# Supplementary material for: A Genomic and Proteomic Approach to Identify and Quantify the Expressed Bacillus thuringiensis Proteins in the Supernatant and Parasporal Crystal
Source: MDPI journal article supplement (doi:10.3390/toxins10050193), 2018-05-10

# Supplementary Materials: A Genomic and Proteomic Approach to Identify and Quantify the Expressed *Bacillus thuringiensis* Proteins in the Supernatant and Parasporal Crystal

Joaquín Gomis-Cebolla, Ana Paula Scaramal Ricietto and Juan Ferré

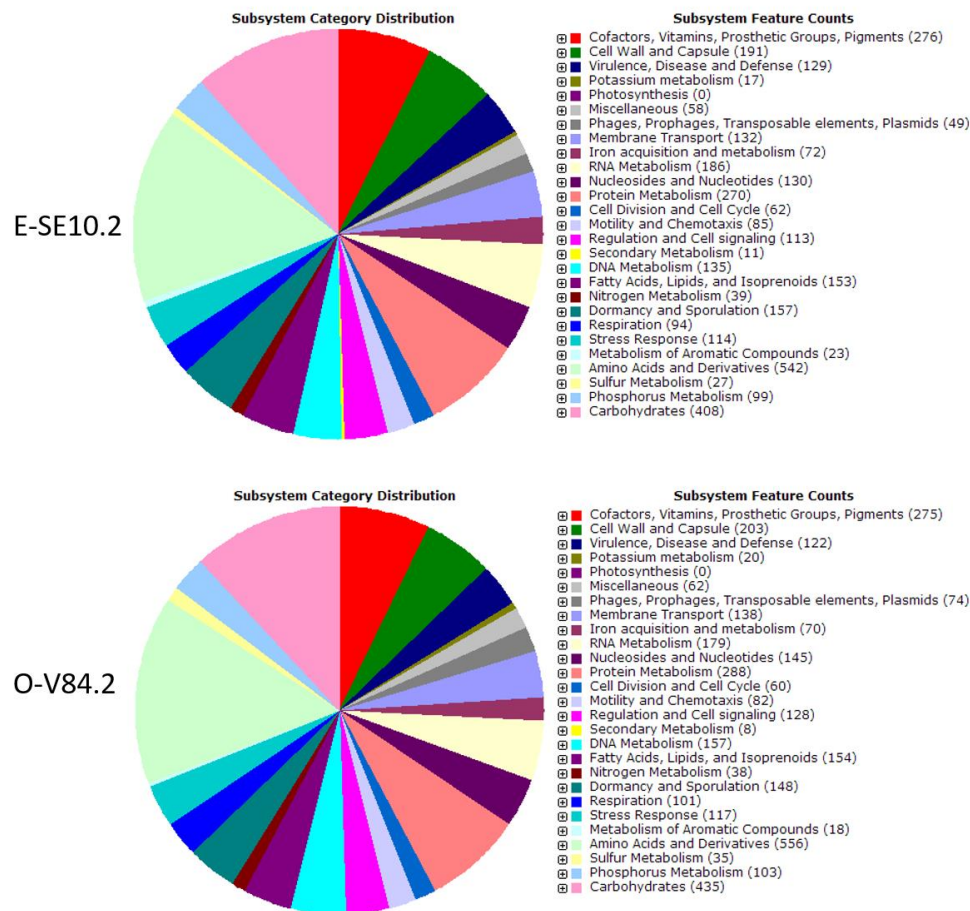

**Figure S1.** Subsystem category distribution of the *Bt* isolates E-SE10.2 and O-V84.2 by the genome annotation based on the Rast server. The right pie chart indicates the percentage or predicted encoding genes associated to at least one subsystem.

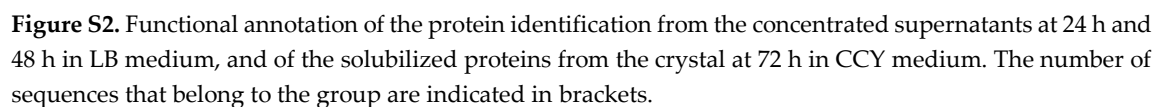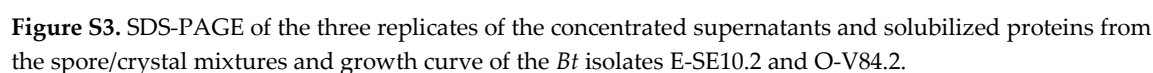

Supplement: s1 [file s1]
