# Supplementary material for: A Genomic and Proteomic Approach to Identify and Quantify the Expressed Bacillus thuringiensis Proteins in the Supernatant and Parasporal Crystal
Source: Toxins (Basel). 2018 May 10;10(5):193. doi: 10.3390/toxins10050193 (PMC5983249; doi:10.3390/toxins10050193)
Supplement: Supplementary file 1 [file toxins-10-00193-s001.zip]

Archive with 6 entries (6 files):
- Table S1.xlsx
- Table S2.xlsx
- Table S3.xlsx
- Table S4.xlsx
- Table S5.xlsx
- toxins-298293 Supplementary.pdf
