# Supplementary material for: A Genomic and Proteomic Approach to Identify and Quantify the Expressed Bacillus thuringiensis Proteins in the Supernatant and Parasporal Crystal
Source: Toxins (Basel). 2018 May 10;10(5):193. doi: 10.3390/toxins10050193 (PMC5983249; doi:10.3390/toxins10050193)
Supplement: Supplementary file 1 [file toxins-10-00193-s001.zip › Table S1.xlsx]

## Sheet: Protein summary
Table S1. Protein summary of three replicates of concentrated supernatants and solubilized proteins from spore/crystal mixtures with Protein Pilot v4.5
Bt isolate	Sample	Replicate	N	Unused	%Cov	%Cov(50)	%Cov(95)	Name	Homology	Peptides(95%)
E-SE10.2	Supernatant 24 h	1	58	19.33	44.89	28.44	22.22	fig|11428.3.peg.6	Vip2Ac-like_1	10
			65	17.79	45.6	38.46	38.19	fig|11428.3.peg.27	Sip1Aa-like_1	9
			24	30.88	70.9	66.79	66.79	fig|11428.3.peg.70	Cry23Aa-like	30
		2	86	16.85	38.67	27.78	20.22	fig|11428.3.peg.6	Vip2Ac-like_1	8
			198	8.7	31.32	26.65	22.53	fig|11428.3.peg.27	Sip1Aa-like_1	7
			21	35.08	70.9	70.9	70.9	fig|11428.3.peg.70	Cry23Aa-like	34
		3	52	22.63	43.33	36.22	30.89	fig|11428.3.peg.6	Vip2Ac-like_1	12
			83	16	38.19	35.99	35.99	fig|11428.3.peg.27	Sip1Aa-like_1	9
			18	40.59	76.49	72.01	70.9	fig|11428.3.peg.70	Cry23Aa-like	39
	Supernatant 48 h	1	96	16.84	35.56	28.89	22	fig|11428.3.peg.6	Vip2Ac-like_1	9
			118	14.29	35.44	29.67	27.75	fig|11428.3.peg.27	Sip1Aa-like_1	8
			34	30.69	72.39	69.4	62.69	fig|11428.3.peg.70	Cry23Aa-like	34
		2	98	16.41	40	26.67	24.67	fig|11428.3.peg.6	Vip2Ac-like_1	8
			175	10.11	28.3	23.63	18.96	fig|11428.3.peg.27	Sip1Aa-like_1	7
			59	21.53	45.15	45.15	45.15	fig|11428.3.peg.70	Cry23Aa-like	21
		3	138	14.95	34.22	27.78	23.11	fig|11428.3.peg.6	Vip2Ac-like_1	7
			275	6.8	25.55	18.41	18.41	fig|11428.3.peg.27	Sip1Aa-like_1	5
			81	21.56	47.39	45.9	45.9	fig|11428.3.peg.70	Cry23A-like	21
	Crystal 72 h	1	1	67.44	94.78	94.4	93.28	fig|11428.3.peg.70	Cry23A-like	68
		2	2	60.41	91.04	89.93	86.57	fig|11428.3.peg.70	Cry23Aa-like_1	61
		3	9	39.33	71.27	70.15	63.81	fig|11428.3.peg.70	Cry23Aa-like	31
O-V84.2	Supernatant 24 h	1	46	12.71	22.34	13.06	11.68	fig|1428.368.peg.1872	Vip4Aa-like_1	7
			74	6.02	15.69	7.908	6.888	fig|1428.368.peg.707	Vip4Aa-like_2	4
			63	8.94	13.03	11.76	9.244	fig|1428.368.peg.1873	Vip2Ac-like_2	5
		2	58	12.18	22.91	15.35	11.34	fig|1428.368.peg.1872	Vip4Aa-like_1	6
			178	1.53	4.592	3.189	1.786	fig|1428.368.peg.707	Vip4Aa-like_2	1
			176	1.73	5.322	1.821	1.821	fig|1428.368.peg.1873	Vip2Ac-like_2	1
		3	54	10.01	8.133	6.529	6.529	fig|1428.368.peg.1872	Vip4Aa-like_1	7
			95	4.02	10.22	3.361	3.361	fig|1428.368.peg.1873	Vip2Ac-like_2	2
			173	1.57	7.649	4.249	2.55	fig|1428.368.peg.3296	Sip1Aa-like_2	1
	Supernatant 48 h	1	289	2.74	8.018	6.071	2.062	fig|1428.368.peg.1872	Vip4Aa-like_1	1
		2	142	8.41	11.91	10.31	9.393	fig|1428.368.peg.1872	Vip4Aa-like_1	6
			277	3.09	11.2	7.563	3.782	fig|1428.368.peg.1873	Vip2Ac-like_2	2
		3	241	4.02	14.78	4.238	3.322	fig|1428.368.peg.1872	Vip4Aa-like_1	2
			227	4.74	11.48	4.062	4.062	fig|1428.368.peg.1873	Vip2Ac-like_2	3
	Crystal 72 h	1	8	29.44	59.71	57.14	49.08	fig|1428.368.peg.6440	Cry45Aa-like_1	17
			9	26	59.11	48.33	44.98	fig|1428.368.peg.5334	Cry45Aa-like_2	18
			13	23.1	83.4	71.06	65.53	fig|1428.368.peg.6442	Cry45Aa-like_3	17
			1	163.91	70.94	66.27	64.64	fig|1428.368.peg.1765	Cry32Ea-like	48
			2	80.18	49.56	41.43	40.1	fig|1428.368.peg.1846	Cry32Da-like	121
			4	55.05	53.35	46.35	43.52	fig|1428.368.peg.6268	Cry32Eb-like	38
			5	54.18	60	53.64	51.16	fig|1428.368.peg.6270	Cry73Aa-like	35
		2	9	39.49	90.48	80.22	72.16	fig|1428.368.peg.6440	Cry45Aa-like_1	29
			17	23.59	72.86	52.79	50.19	fig|1428.368.peg.5334	Cry45Aa-like_2	21
			10	33.54	89.36	83.4	83.4	fig|1428.368.peg.6442	Cry45Aa-like_3	27
			1	180.55	82.06	77.61	76.5	fig|1428.368.peg.1765	Cry32Ea-like	163
			2	101.1	67.87	61.3	57.61	fig|1428.368.peg.1846	Cry32Da-like	64
			7	57.44	67.66	57.53	52.31	fig|1428.368.peg.6268	Cry32Eb-like	49
			3	79.34	76.28	70.85	69.46	fig|1428.368.peg.6270	Cry73Aa-like	62
		3	8	27.66	58.24	49.45	44.32	fig|1428.368.peg.6440	Cry45Aa-like_1	17
			13	23.45	65.06	46.84	44.24	fig|1428.368.peg.5334	Cry45Aa-like_2	19
			11	23.59	83.4	81.28	75.32	fig|1428.368.peg.6442	Cry45Aa-like_3	17
			1	172.42	73.31	69.98	68.12	fig|1428.368.peg.1765	Cry32Ea-like	136
			5	47.1	54.25	45.01	43.96	fig|1428.368.peg.6268	Cry32Da-like	32
			2	74.45	52.95	43.21	41.21	fig|1428.368.peg.1846	Cry32Eb-like	45
			3	59.08	61.24	57.21	55.35	fig|1428.368.peg.6270	Cry73Aa-like	40
PROTEIN SUMMARY INTERPRETATION
Proteins Detected Table
The Proteins Detected table lists the winner protein for each group, sorted by Unused ProtScore. Table fields and their definitions are listed below.
N
The rank of the specified protein relative to all other proteins in the list of detected proteins.
Unused (ProtScore)
A measure of the protein confidence for a detected protein, calculated from the peptide confidence for peptides from spectra that are not already completely “used” by higher scoring winning proteins.
% Cov (Coverage)
The percentage of matching amino acids from identified peptides having confidence greater than 0 divided by the total number of amino acids in the sequence.
% Cov (50)
The percentage of matching amino acids from identified peptides having confidence greater than or equal to 50% divided by the total number of amino acids in the sequence.
% Cov (95)
The percentage of matching amino acids from identified peptides having confidence greater than or equal to 95% divided by the total number of amino acids in the sequence.
Name
The name of the protein.
Peptides (95%)
The number of distinct peptides having at least 95% confidence. Multiple modified and cleaved states of the same underlying peptide sequence are considered distinct peptides because they have different
molecular formulas. Multiple spectra of the same peptide, due to replicate acquisition or different charge states, only count once
