# Supplementary material for: A Genomic and Proteomic Approach to Identify and Quantify the Expressed Bacillus thuringiensis Proteins in the Supernatant and Parasporal Crystal
Source: Toxins (Basel). 2018 May 10;10(5):193. doi: 10.3390/toxins10050193 (PMC5983249; doi:10.3390/toxins10050193)
Supplement: Supplementary file 1 [file toxins-10-00193-s001.zip › Table S2.xlsx]

## Sheet: Peptide summary
Table S2. Peptide summary of three replicates of concentrated supernatants and solubilized proteins from spore/crystal mixtures identified with Protein Pilot v4.5
Bt isolate	Sample	Replicate	Homology	Names	Contrib	Conf	Sequence	Modifications	Cleavages	dMass	Prec MW	Prec m/z	Theor MW	Theor m/z	Theor z	Sc	Spectrum
E-SE10.2	Supernatant 24 h	1	Vip2Ac-like_1	fig|11428.3.peg.6	2	99	AKEWAESNFKDWKK		missed K-E@2; missed K-D@10; missed K-K@13	-0.00472554	1765.87	883.944	1765.88	883.947	2	15	1.1.1.1505.26
				fig|11428.3.peg.6	2	99	FIKDLINSLN		missed K-D@3	-0.00116109	1175.65	588.834	1175.66	588.835	2	16	1.1.1.2014.2
				fig|11428.3.peg.6	2	99	IDNLYASASIDR			-0.00177917	1336.66	669.337	1336.66	669.338	2	18	1.1.1.1598.10
				fig|11428.3.peg.6	2	99	KNITIEPYIKK		missed K-N@1; missed K-K@10	-0.00103562	1345.8	673.905	1345.8	673.906	2	13	1.1.1.1481.20
				fig|11428.3.peg.6	2	99	LKEMNDKIDRYDQISGK		missed K-E@2; missed K-I@7; missed R-Y@10	-0.000577291	2052.03	1027.02	2052.03	1027.02	2	18	1.1.1.1471.24
				fig|11428.3.peg.6	2	99	NLGIEITR			-0.00392248	914.515	458.265	914.519	458.267	2	13	1.1.1.1583.6
				fig|11428.3.peg.6	2	99	QLVSNVPNNLLLNIMK	Gln->pyro-Glu@N-term		0.00177049	1791.99	897.004	1791.99	897.003	2	22	1.1.1.3162.2
				fig|11428.3.peg.6	2	99	SAPILLSLTLAK			0.000916716	1225.77	613.89	1225.76	613.89	2	18	1.1.1.2257.2
				fig|11428.3.peg.6	1.19382	96.38	EMNDKIDRYDQISGK		missed K-I@5; missed R-Y@8	0.00407126	1810.86	906.435	1810.85	906.433	2	11	1.1.1.1472.26
				fig|11428.3.peg.6	0.879426	92.29	NITIEPYIKK		missed K-K@9	-0.00179971	1217.7	609.857	1217.7	609.858	2	12	1.1.1.1567.14
				fig|11428.3.peg.6	0.732828	88.92	GTSIGHLNEDHIITER			0.000222287	1790.89	597.971	1790.89	597.971	3	11	1.1.1.1509.19
				fig|11428.3.peg.6	0.383	93.68	TLFIQIDHYGHK			-0.0348875	1470.73	491.25	1470.76	491.261	3	13	1.1.1.1616.2
				fig|11428.3.peg.6	0.0510982	18.54	SLTSEQQK			-5.10253e-05	919.461	460.738	919.461	460.738	2	6	1.1.1.1200.5
			Sip1Aa-like_1	fig|11428.3.peg.27	2	99	AETTSSHAVTNQQPITQR		cleaved A-A@N-term	0.00035705	1967.97	656.996	1967.97	656.996	3	13	1.1.1.1352.19
				fig|11428.3.peg.27	2	99	AIDLSNIR			-0.00250775	900.5	451.257	900.503	451.259	2	12	1.1.1.1592.5
				fig|11428.3.peg.27	2	99	FISWFKDNLASPGGYDSIAEQMGLK		missed K-D@6	0.00440813	2773.35	925.456	2773.34	925.455	3	24	1.1.1.2506.4
				fig|11428.3.peg.27	2	99	FTVPSQEVTLAPGHK			-0.00060687	1609.85	537.623	1609.85	537.623	3	18	1.1.1.1609.9
				fig|11428.3.peg.27	2	99	NYIKNGDTLYIETPAK	Deamidated(N)@5	missed K-N@4	-0.00333476	1839.92	920.968	1839.93	920.97	2	23	1.1.1.1619.16
				fig|11428.3.peg.27	2	99	SINMQEQIIDGWFLAR			-0.00400539	1919.95	960.984	1919.96	960.985	2	22	1.1.1.2684.2
				fig|11428.3.peg.27	2	99	TGDTIYNGVSELK	Deamidated(N)@7		-0.00220597	1396.67	699.342	1396.67	699.343	2	20	1.1.1.1662.7
				fig|11428.3.peg.27	2	99	VAALNDMNISNVNYTSK	Oxidation(M)@7		-0.0239267	1868.87	935.442	1868.89	935.454	2	20	1.1.1.1579.21
				fig|11428.3.peg.27	1.48149	98.26	AESYIDIVHNR			-0.00569649	1315.65	439.556	1315.65	439.558	3	13	1.1.1.1561.3
				fig|11428.3.peg.27	0.238072	58.2	AIDLSNIRK		missed R-K@8	-0.00151321	1028.6	515.305	1028.6	515.306	2	10	1.1.1.1500.13
				fig|11428.3.peg.27	0.0555173	20.62	NITGTTQK			-0.000855366	861.455	431.735	861.456	431.735	2	6	1.1.1.1195.4
			Cry23Aa-like	fig|11428.3.peg.70	2	99	DGALIAAAYVSITDLADYNPNLGLTNEGNGVAHFK	Deamidated(N)@29		0.0138015	3604.78	902.203	3604.77	902.199	4	33	1.1.1.4106.2
				fig|11428.3.peg.70	2	99	FKGEGYIEGAQGLR		cleaved H-F@N-term; missed K-G@2	-0.000195962	1523.77	508.932	1523.77	508.932	3	17	1.1.1.1575.9
				fig|11428.3.peg.70	2	99	GEGYIEGAQGLR			-0.00291714	1248.61	625.311	1248.61	625.312	2	20	1.1.1.1536.8
				fig|11428.3.peg.70	2	99	GIINIQDEINDYMK	Ammonia-loss(N)@10	cleaved M-G@N-term	0.00519482	1647.79	824.901	1647.78	824.898	2	19	1.1.1.2218.6
				fig|11428.3.peg.70	2	99	GIINIQDEINDYMKGMYGATSVK	Deamidated(N)@10	cleaved M-G@N-term; missed K-G@14	0.00670283	2560.23	854.416	2560.22	854.414	3	18	1.1.1.2159.3
				fig|11428.3.peg.70	2	99	GMYGATSVK			-0.000106542	912.438	457.226	912.438	457.226	2	14	1.1.1.1386.4
				fig|11428.3.peg.70	2	99	GMYGATSVKSTYDSSFK		missed K-S@9	-0.00180963	1827.83	914.924	1827.83	914.925	2	24	1.1.1.1528.25
				fig|11428.3.peg.70	2	99	MGIINIQDEINDYMK			0.000966181	1795.85	898.932	1795.85	898.932	2	22	1.1.1.2426.3
				fig|11428.3.peg.70	2	99	SYIQVTEYPMDDNGRR	Deamidated(N)@13	cleaved R-P@C-term; missed R-R@15	0.00157306	1943.87	648.964	1943.87	648.963	3	16	1.1.1.1623.10
				fig|11428.3.peg.70	2	99	TDTRTWTDTTTVK		missed R-T@4	0.000156285	1524.74	763.378	1524.74	763.378	2	17	1.1.1.1429.25
				fig|11428.3.peg.70	2	99	TWTDTTTVK			0.00232511	1051.52	526.768	1051.52	526.767	2	14	1.1.1.1441.15
				fig|11428.3.peg.70	2	99	TWTDTTTVKAPPR		missed K-A@9	0.00112815	1472.76	491.928	1472.76	491.928	3	16	1.1.1.1465.3
				fig|11428.3.peg.70	2	99	VFNESVTPQYDVIPTEPVNNHITTK			0.000911806	2841.42	948.147	2841.42	948.147	3	21	1.1.1.1856.3
				fig|11428.3.peg.70	2	99	VIDNPGTSEVTSTVTFTWTETDTVTSAVTK			0.00113535	3186.55	1063.19	3186.55	1063.19	3	20	1.1.1.4110.2
				fig|11428.3.peg.70	1.60206	98.22	VGGSVSSK			0.000666621	719.382	360.698	719.381	360.698	2	9	1.1.1.1073.2
				fig|11428.3.peg.70	0.8041	99	SYIQVTEYPMDDNGR	Oxidation(M)@10; Deamidated(N)@13		-0.00145645	1803.76	902.888	1803.76	902.888	2	15	1.1.1.1613.25
				fig|11428.3.peg.70	0.20621	45.73	STYDSSFK			0.000449072	933.408	467.712	933.408	467.711	2	10	1.1.1.1395.2
				fig|11428.3.peg.70	0.116339	95.21	SYIQVTEYPMDDNGRRPASN	Deamidated(N)@13	cleaved N-T@C-term; missed R-R@15	0.00746119	2313.04	772.021	2313.03	772.018	3	14	1.1.1.1612.18
				fig|11428.3.peg.70	0.0846002	93.42	VIPTEPVNNHITTK		cleaved D-V@N-term	0.00446874	1561.85	521.624	1561.85	521.623	3	12	1.1.1.1462.10
				fig|11428.3.peg.70	0.0710923	65.84	IEGAQGLR		cleaved Y-I@N-term	-0.000678528	842.46	422.238	842.461	422.238	2	7	1.1.1.1366.3
				fig|11428.3.peg.70	0.000434512	52.11	LGLTNEGNGVAHFK	Deamidated(N)@5; Deamidated(N)@8	cleaved N-L@N-term	0.0390587	1457.75	486.925	1457.72	486.912	3	13	1.1.1.1579.6
		2	Vip2Ac-like_1	fig|11428.3.peg.6	2	99	DSTEFFAGVFNYLYSPK			0.00141656	1983.93	992.971	1983.93	992.97	2	23	1.1.1.3613.2
				fig|11428.3.peg.6	2	99	GTSIGHLNEDHIITER			0.000793819	1790.89	597.971	1790.89	597.971	3	22	1.1.1.1644.15
				fig|11428.3.peg.6	2	99	IDNLYASASIDR			-0.000684247	1336.66	669.338	1336.66	669.338	2	19	1.1.1.1731.5
				fig|11428.3.peg.6	2	99	IDNLYASASIDRTETIIK		missed R-T@12	0.00152954	2022.06	675.029	2022.06	675.028	3	17	1.1.1.1859.5
				fig|11428.3.peg.6	2	99	NMNDKTLFTITDK		missed K-T@5	-0.000726547	1539.76	514.26	1539.76	514.261	3	16	1.1.1.1783.7
				fig|11428.3.peg.6	2	99	SEDLGYADKYFYAANDSR		missed K-Y@9	0.00300536	2083.92	695.646	2083.91	695.645	3	25	1.1.1.1849.5
				fig|11428.3.peg.6	1.69897	98.93	TSIVVVNGR			0.00380472	943.549	472.782	943.545	472.78	2	10	1.1.1.1572.7
				fig|11428.3.peg.6	1.40894	97.97	YFYAANDSR			0.00261948	1105.49	553.75	1105.48	553.749	2	10	1.1.1.1580.13
				fig|11428.3.peg.6	0.924453	93.48	AKEWAESNFKDWKK		missed K-E@2; missed K-D@10; missed K-K@13	0.00954567	1765.89	589.637	1765.88	589.634	3	10	1.1.1.1627.13
				fig|11428.3.peg.6	0.50307	80.89	TLFIQIDHYGHK			-0.00346895	1470.76	491.26	1470.76	491.261	3	12	1.1.1.1754.8
				fig|11428.3.peg.6	0.195861	52.41	NLGIEITR			-0.000854132	914.518	458.266	914.519	458.267	2	10	1.1.1.1717.9
				fig|11428.3.peg.6	0.110698	35.89	NITIEPYIK			-0.00291397	1089.6	545.809	1089.61	545.811	2	10	1.1.1.1819.6
			Sip1Aa-like_1	fig|11428.3.peg.27	2	99	AIDLSNIR			5.85569e-05	900.503	451.259	900.503	451.259	2	12	1.1.1.1726.6
				fig|11428.3.peg.27	2	99	TGDTIYNGVSELK			-0.002597	1395.69	698.85	1395.69	698.851	2	14	1.1.1.1760.22
				fig|11428.3.peg.27	2	99	VAALNDMNISNVNYTSK			-0.00158645	1852.9	927.456	1852.9	927.457	2	25	1.1.1.1828.15
				fig|11428.3.peg.27	1.25181	98.27	AESYIDIVHNR			-0.00283159	1315.65	439.557	1315.65	439.558	3	12	1.1.1.1694.3
				fig|11428.3.peg.27	0.694649	99	ETTSSHAVTNQQPITQR		cleaved A-E@N-term	-0.000217152	1896.93	633.317	1896.93	633.317	3	13	1.1.1.1454.19
				fig|11428.3.peg.27	0.568636	97.46	NYIKNGDTLYIETPAK	Deamidated(N)@5	missed K-N@4	0.000835966	1839.93	614.316	1839.93	614.316	3	12	1.1.1.1746.16
				fig|11428.3.peg.27	0.134304	54.85	FTVPSQEVTLAPGHK			0.000392233	1609.85	537.623	1609.85	537.623	3	10	1.1.1.1742.12
				fig|11428.3.peg.27	0.02365	15.77	MVYSGTHDLK			0.0018537	1149.55	384.191	1149.55	384.19	3	10	1.1.1.1497.2
			Cry23Aa-like	fig|11428.3.peg.70	2	99	DGALIAAAYVSITDLADYNPNLGLTNEGNGVAHFK	Deamidated(N)@29		0.0114515	3604.78	902.202	3604.77	902.199	4	32	1.1.1.4460.2
				fig|11428.3.peg.70	2	99	ESVTPQYDVIPTEPVNNHITTK	Deamidated(N)@16	cleaved N-E@N-term	0.00790669	2482.23	828.418	2482.22	828.415	3	18	1.1.1.1825.13
				fig|11428.3.peg.70	2	99	GEGYIEGAQGLR			-0.00529896	1248.6	625.31	1248.61	625.312	2	18	1.1.1.1654.12
				fig|11428.3.peg.70	2	99	GIINIQDEINDYMK		cleaved M-G@N-term	0.00446346	1664.81	833.413	1664.81	833.411	2	23	1.1.1.2497.3
				fig|11428.3.peg.70	2	99	GMYGATSVK			-0.00221923	912.435	457.225	912.438	457.226	2	10	1.1.1.1490.7
				fig|11428.3.peg.70	2	99	GMYGATSVKSTYDSSFK	Oxidation(M)@2	missed K-S@9	-0.00236617	1843.83	922.921	1843.83	922.922	2	15	1.1.1.1615.26
				fig|11428.3.peg.70	2	99	MGIINIQDEINDYMK			4.7735e-05	1795.85	898.932	1795.85	898.932	2	24	1.1.1.2728.2
				fig|11428.3.peg.70	2	99	RPASNTYLIQGSLAPNVTLINDRK		missed R-K@23	0.00224366	2640.44	881.153	2640.43	881.152	3	22	1.1.1.1864.4
				fig|11428.3.peg.70	2	99	SYIQVTEYPMDDNGR			3.56975e-05	1786.78	894.399	1786.78	894.399	2	17	1.1.1.1813.25
				fig|11428.3.peg.70	2	99	SYIQVTEYPMDDNGRR	Deamidated(N)@13	cleaved R-P@C-term; missed R-R@15	-0.00185797	1943.87	648.963	1943.87	648.963	3	16	1.1.1.1772.21
				fig|11428.3.peg.70	2	99	SYIQVTEYPMDDNGRRPASNTYLIQGSLAPNVTLINDR	Deamidated(N)@20	missed R-R@15	0.020051	4282.11	1071.54	4282.1	1071.53	4	27	1.1.1.2362.3
				fig|11428.3.peg.70	2	99	SYIQVTEYPMDDNGRRPASNTYLIQGSLAPNVTLINDRK	Deamidated(N)@20	missed R-R@15; missed R-K@38	0.0203669	4410.21	883.05	4410.19	883.046	5	18	1.1.1.2166.2
				fig|11428.3.peg.70	2	99	TDTRTWTDTTTVK		missed R-T@4	0.000372757	1524.74	509.255	1524.74	509.255	3	19	1.1.1.1555.13
				fig|11428.3.peg.70	2	99	VFNESVTPQYDVIPTEPVNNHITTK			0.00205504	2841.42	711.362	2841.42	711.362	4	18	1.1.1.1821.10
				fig|11428.3.peg.70	2	99	VIDNPGTSEVTSTVTFTWTETDTVTSAVTK			0.00809933	3186.55	1063.19	3186.55	1063.19	3	20	1.1.1.4643.2
				fig|11428.3.peg.70	1.37675	96.68	TWTDTTTVKAPPR		missed K-A@9	0.00268412	1472.77	491.929	1472.76	491.928	3	13	1.1.1.1583.4
				fig|11428.3.peg.70	1.27572	99	TWTDTTTVK	Dioxidation(W)@2		-0.00259614	1083.51	542.76	1083.51	542.761	2	15	1.1.1.1509.7
				fig|11428.3.peg.70	1.22915	99	LGLTNEGNGVAHFK	Deamidated(N)@8	cleaved N-L@N-term	-0.000965098	1456.73	486.584	1456.73	486.584	3	16	1.1.1.1710.8
				fig|11428.3.peg.70	0.545155	99	FKGEGYIEGAQGLR		cleaved H-F@N-term; missed K-G@2	-0.00675057	1523.77	762.89	1523.77	762.894	2	13	1.1.1.1708.19
				fig|11428.3.peg.70	0.449772	70.09	STYDSSFK			-0.00232894	933.406	467.71	933.408	467.711	2	11	1.1.1.1501.9
				fig|11428.3.peg.70	0.111259	95.47	SYIQVTEYPMDDNGRRPASN	Deamidated(N)@13	cleaved N-T@C-term; missed R-R@15	-0.00454993	2313.03	772.017	2313.03	772.018	3	14	1.1.1.1764.20
				fig|11428.3.peg.70	0.047692	67.6	GVAHFKGEGYIEGAQGLR		cleaved N-G@N-term; missed K-G@6	0.00937117	1887.97	472.999	1887.96	472.997	4	12	1.1.1.1702.3
				fig|11428.3.peg.70	0.032452	74.44	SVTPQYDVIPTEPVNNHITTK		cleaved E-S@N-term	0.00735378	2352.2	785.075	2352.2	785.073	3	11	1.1.1.1783.18
				fig|11428.3.peg.70	0.00966115	72.63	SYIQVTEYPMDDNGRRPA	Deamidated(N)@13	cleaved A-S@C-term; missed R-R@15	0.00359234	2111.96	704.995	2111.96	704.993	3	12	1.1.1.1781.10
				fig|11428.3.peg.70	0.00130484	24.69	GYIEGAQGLR		cleaved E-G@N-term	-0.00660921	1062.54	532.277	1062.55	532.28	2	10	1.1.1.1633.6
		3	Vip2Ac-like_1	fig|11428.3.peg.6	2	99	AKEWAESNFKDWKK		missed K-E@2; missed K-D@10; missed K-K@13	0.00739262	1765.89	883.95	1765.88	883.947	2	14	1.1.1.1675.26
				fig|11428.3.peg.6	2	99	DSTEFFAGVFNYLYSPK			-0.00236595	1983.92	992.969	1983.93	992.97	2	22	1.1.1.3441.2
				fig|11428.3.peg.6	2	99	FIKDLINSLN		missed K-D@3	-0.00231051	1175.65	588.834	1175.66	588.835	2	16	1.1.1.2174.2
				fig|11428.3.peg.6	2	99	IDNLYASASIDR			-0.00264103	1336.66	669.337	1336.66	669.338	2	16	1.1.1.1774.15
				fig|11428.3.peg.6	2	99	IDNLYASASIDRTETIIK		missed R-T@12	-0.00373452	2022.06	675.027	2022.06	675.028	3	17	1.1.1.1913.5
				fig|11428.3.peg.6	2	99	LKEMNDKIDRYDQISGK		missed K-E@2; missed K-I@7; missed R-Y@10	-0.00387744	2052.03	1027.02	2052.03	1027.02	2	16	1.1.1.1637.19
				fig|11428.3.peg.6	2	99	NMNDKTLFTITDK		missed K-T@5	-0.00176766	1539.76	770.886	1539.76	770.887	2	20	1.1.1.1821.14
				fig|11428.3.peg.6	2	99	QLVSNVPNNLLLNIMK	Gln->pyro-Glu@N-term		0.000549917	1791.99	897.003	1791.99	897.003	2	22	1.1.1.3408.2
				fig|11428.3.peg.6	2	99	SAPILLSLTLAK			-0.00414091	1225.76	613.888	1225.76	613.89	2	19	1.1.1.2491.2
				fig|11428.3.peg.6	2	99	TSIVVVNGREVIK	Deamidated(N)@7	missed R-E@9	-0.00366638	1413.82	707.915	1413.82	707.917	2	16	1.1.1.1745.22
				fig|11428.3.peg.6	1.08092	95.23	NITIEPYIK			-0.00403296	1089.6	545.809	1089.61	545.811	2	12	1.1.1.1858.2
				fig|11428.3.peg.6	0.521434	80.67	NLGIEITR			-0.00237494	914.516	458.265	914.519	458.267	2	10	1.1.1.1756.6
				fig|11428.3.peg.6	0.440093	75.94	EMNDKIDRYDQISGK		missed K-I@5; missed R-Y@8	0.00382117	1810.86	604.626	1810.85	604.625	3	12	1.1.1.1639.18
				fig|11428.3.peg.6	0.421361	74.7	GTSIGHLNEDHIITER			-0.00115451	1790.89	448.73	1790.89	448.73	4	12	1.1.1.1690.2
				fig|11428.3.peg.6	0.101275	32.11	NLLQLK			-0.00115272	727.458	364.736	727.459	364.737	2	9	1.1.1.1753.2
			Sip1Aa-like_1	fig|11428.3.peg.27	2	99	AESYIDIVHNR			0.00108235	1315.65	658.834	1315.65	658.833	2	14	1.1.1.1736.19
				fig|11428.3.peg.27	2	99	AETTSSHAVTNQQPITQR		cleaved A-A@N-term	0.0100595	1967.98	656.999	1967.97	656.996	3	15	1.1.1.1517.10
				fig|11428.3.peg.27	2	99	FISWFKDNLASPGGYDSIAEQMGLK		missed K-D@6	0.000600606	2773.34	925.455	2773.34	925.455	3	25	1.1.1.2758.5
				fig|11428.3.peg.27	2	99	FTVPSQEVTLAPGHK			-0.00288798	1609.84	537.622	1609.85	537.623	3	19	1.1.1.1782.9
				fig|11428.3.peg.27	2	99	NYIKNGDTLYIETPAK	Deamidated(N)@5	missed K-N@4	-0.00196254	1839.92	614.315	1839.93	614.316	3	18	1.1.1.1785.19
				fig|11428.3.peg.27	2	99	SINMQEQIIDGWFLAR			-0.00551068	1919.95	960.983	1919.96	960.985	2	22	1.1.1.2954.3
				fig|11428.3.peg.27	2	99	TGDTIYNGVSELK	Deamidated(N)@7		-0.0024077	1396.67	699.342	1396.67	699.343	2	23	1.1.1.1839.8
				fig|11428.3.peg.27	2	99	VAALNDMNISNVNYTSK			2.14633e-05	1852.9	927.457	1852.9	927.457	2	25	1.1.1.1872.7
			Cry23Aa-like	fig|11428.3.peg.70	2	99	DGALIAAAYVSITDLADYNPNLGLTNEGNGVAHFK	Deamidated(N)@29		-0.00171206	3604.77	1202.6	3604.77	1202.6	3	24	1.1.1.3527.2
				fig|11428.3.peg.70	2	99	ESVTPQYDVIPTEPVNNHITTK		cleaved N-E@N-term	0.00308673	2481.24	828.088	2481.24	828.087	3	18	1.1.1.1835.11
				fig|11428.3.peg.70	2	99	FKGEGYIEGAQGLR		cleaved H-F@N-term; missed K-G@2	-0.00256072	1523.77	762.893	1523.77	762.894	2	19	1.1.1.1750.21
				fig|11428.3.peg.70	2	99	GEGYIEGAQGLR			0.00216496	1248.61	625.313	1248.61	625.312	2	17	1.1.1.1704.16
				fig|11428.3.peg.70	2	99	GIINIQDEINDYMK	Ammonia-loss(N)@10	cleaved M-G@N-term	-0.00348142	1647.78	824.896	1647.78	824.898	2	20	1.1.1.2435.3
				fig|11428.3.peg.70	2	99	GIINIQDEINDYMKGMYGATSVK	Deamidated(N)@10	cleaved M-G@N-term; missed K-G@14	0.00159771	2560.22	854.414	2560.22	854.414	3	17	1.1.1.2954.2
				fig|11428.3.peg.70	2	99	GMYGATSVK			0.000655988	912.438	457.226	912.438	457.226	2	14	1.1.1.1558.5
				fig|11428.3.peg.70	2	99	GMYGATSVKSTYDSSFK		missed K-S@9	0.00468991	1827.84	914.927	1827.83	914.925	2	27	1.1.1.1709.12
				fig|11428.3.peg.70	2	99	GVAHFKGEGYIEGAQGLR		cleaved N-G@N-term; missed K-G@6	0.00303689	1887.96	472.998	1887.96	472.997	4	16	1.1.1.1744.8
				fig|11428.3.peg.70	2	99	IINIQDEINDYMK		cleaved G-I@N-term	0.000402522	1607.79	804.901	1607.79	804.901	2	19	1.1.1.2489.5
				fig|11428.3.peg.70	2	99	MGIINIQDEINDYMK			-0.00442775	1795.84	898.929	1795.85	898.932	2	21	1.1.1.2674.5
				fig|11428.3.peg.70	2	99	RPASNTYLIQGSLAPNVTLINDRK		missed R-K@23	0.00505262	2640.44	661.117	2640.43	661.116	4	24	1.1.1.1914.8
				fig|11428.3.peg.70	2	99	SYIQVTEYPMDDNGR			-0.000787775	1786.78	894.399	1786.78	894.399	2	17	1.1.1.1857.11
				fig|11428.3.peg.70	2	99	SYIQVTEYPMDDNGRR	Deamidated(N)@13	cleaved R-P@C-term; missed R-R@15	-0.0036594	1943.86	972.94	1943.87	972.941	2	17	1.1.1.1797.23
				fig|11428.3.peg.70	2	99	SYIQVTEYPMDDNGRRPASNTYLIQGSLAPNVTLINDRK	Deamidated(N)@20; Deamidated(N)@36	missed R-R@15; missed R-K@38	0.0103299	4411.19	883.244	4411.18	883.242	5	23	1.1.1.2350.5
				fig|11428.3.peg.70	2	99	TDTRTWTDTTTVK		missed R-T@4	-0.000377133	1524.74	763.378	1524.74	763.378	2	15	1.1.1.1609.23
				fig|11428.3.peg.70	2	99	TWTDTTTVKAPPR		missed K-A@9	-0.00206125	1472.76	737.387	1472.76	737.388	2	16	1.1.1.1629.26
				fig|11428.3.peg.70	2	99	VFNESVTPQYDVIPTEPVNNHITTK			-0.000744837	2841.42	948.146	2841.42	948.147	3	19	1.1.1.1946.2
				fig|11428.3.peg.70	2	99	VIDNPGTSEVTSTVTFTWTETDTVTSAVTK			0.00685324	3186.55	1063.19	3186.55	1063.19	3	22	1.1.1.4262.2
				fig|11428.3.peg.70	1.16749	99	TWTETDTVTSAVTK		cleaved F-T@N-term	0.0079623	1538.75	770.385	1538.75	770.38	2	12	1.1.1.1774.20
				fig|11428.3.peg.70	0.551294	99	SYIQVTEYPMDDNGRRPASN	Deamidated(N)@13	cleaved N-T@C-term; missed R-R@15	0.00193887	2313.04	772.019	2313.03	772.018	3	15	1.1.1.1800.18
				fig|11428.3.peg.70	0.465974	99	TWTDTTTVK	Dioxidation(W)@2		-0.000390271	1083.51	542.761	1083.51	542.761	2	14	1.1.1.1565.4
				fig|11428.3.peg.70	0.284833	55.57	STYDSSFK			0.000698376	933.409	467.712	933.408	467.711	2	10	1.1.1.1561.8
				fig|11428.3.peg.70	0.0716041	90.42	GYRDGALIAAAY		cleaved Y-V@C-term; missed R-D@3	-0.00234593	1239.62	620.818	1239.62	620.82	2	13	1.1.1.1841.9
				fig|11428.3.peg.70	0.0486625	93.47	SYIQVTEYPMDDNGRRPA	Deamidated(N)@13	cleaved A-S@C-term; missed R-R@15	0.00744423	2111.97	704.996	2111.96	704.993	3	14	1.1.1.1822.10
				fig|11428.3.peg.70	0.000434512	15.63	IQDEINDYMK	Deamidated(N)@6	cleaved N-I@N-term	0.0288013	1268.59	635.301	1268.56	635.287	2	10	1.1.1.1725.17
	Supernatant 48 h	1	Vip2Ac-like_1	fig|11428.3.peg.6	2	99	DSTEFFAGVFNYLYSPK			-0.00373165	1983.92	992.968	1983.93	992.97	2	23	1.1.1.3188.2
				fig|11428.3.peg.6	2	99	EGVLGYYDTISK			0.00218275	1343.66	672.839	1343.66	672.838	2	19	1.1.1.1886.6
				fig|11428.3.peg.6	2	99	IDNLYASASIDR			0.00391441	1336.67	669.34	1336.66	669.338	2	15	1.1.1.1728.17
				fig|11428.3.peg.6	2	99	IDNLYASASIDRTETIIK		missed R-T@12	0.000968276	2022.06	675.029	2022.06	675.028	3	16	1.1.1.1868.14
				fig|11428.3.peg.6	2	99	NLGIEITR			-0.000575018	914.518	458.266	914.519	458.267	2	11	1.1.1.1715.7
				fig|11428.3.peg.6	2	99	SEDLGYADKYFYAANDSR		missed K-Y@9	0.00340573	2083.92	695.646	2083.91	695.645	3	24	1.1.1.1858.11
				fig|11428.3.peg.6	2	99	TSIVVVNGR			-0.000219024	943.545	472.78	943.545	472.78	2	10	1.1.1.1567.7
				fig|11428.3.peg.6	1.20066	96.88	LKEMNDKIDRYDQISGK		missed K-E@2; missed K-I@7; missed R-Y@10	-0.00282911	2052.03	685.017	2052.03	685.018	3	12	1.1.1.1588.21
				fig|11428.3.peg.6	0.701147	89.44	NMNDKTLFTITDK		missed K-T@5	-0.00624299	1539.75	514.259	1539.76	514.261	3	10	1.1.1.1786.4
				fig|11428.3.peg.6	0.307153	68.34	TLFIQIDHYGHK			-0.00132595	1470.76	491.261	1470.76	491.261	3	9	1.1.1.1756.3
				fig|11428.3.peg.6	0.296709	67.32	NLLQLK			-0.00297834	727.456	364.735	727.459	364.737	2	8	1.1.1.1712.2
				fig|11428.3.peg.6	0.197911	54.81	LKEMNDKIDR		missed K-E@2; missed K-I@7	-0.00168432	1260.65	421.223	1260.65	421.224	3	7	1.1.1.1417.3
				fig|11428.3.peg.6	0.121478	40.45	SLDFEKDKEK		missed K-D@6; missed K-E@8	0.00177258	1237.62	413.548	1237.62	413.547	3	9	1.1.1.1447.3
			Sip1Aa-like_1	fig|11428.3.peg.27	2	99	AIDLSNIR			0.00120732	900.504	451.259	900.503	451.259	2	11	1.1.1.1725.2
				fig|11428.3.peg.27	2	99	ETTSSHAVTNQQPITQR		cleaved A-E@N-term	-0.00357608	1896.93	633.316	1896.93	633.317	3	14	1.1.1.1451.10
				fig|11428.3.peg.27	2	99	FTVPSQEVTLAPGHK			-0.000828261	1609.85	537.622	1609.85	537.623	3	17	1.1.1.1742.7
				fig|11428.3.peg.27	2	99	NYIKNGDTLYIETPAK	Deamidated(N)@5	missed K-N@4	-0.00479122	1839.92	920.968	1839.93	920.97	2	15	1.1.1.1753.18
				fig|11428.3.peg.27	2	99	SQSTSITNGLQLGFK			0.00166637	1579.82	790.918	1579.82	790.918	2	18	1.1.1.1908.11
				fig|11428.3.peg.27	2	99	TGDTIYNGVSELK	Deamidated(N)@7		0.000634694	1396.67	699.344	1396.67	699.343	2	15	1.1.1.1726.10
				fig|11428.3.peg.27	2	99	VAALNDMNISNVNYTSK			0.00364707	1852.9	927.459	1852.9	927.457	2	18	1.1.1.1836.13
				fig|11428.3.peg.27	0.208309	59.34	FISWFK			-0.0030813	826.435	414.225	826.438	414.226	2	9	1.1.1.1966.2
				fig|11428.3.peg.27	0.0783135	87.71	AETTSSHAVTNQQPITQR		cleaved A-A@N-term	8.05055e-05	1967.97	656.996	1967.97	656.996	3	11	1.1.1.1461.19
			Cry23Aa-like	fig|11428.3.peg.70	2	99	DGALIAAAYVSITDLADYNPNLGLTNEGNGVAHFK	Deamidated(N)@29		-0.00445388	3604.76	902.198	3604.77	902.199	4	29	1.1.1.3616.2
				fig|11428.3.peg.70	2	99	GEGYIEGAQGLR			0.00114342	1248.61	417.211	1248.61	417.211	3	19	1.1.1.1666.4
				fig|11428.3.peg.70	2	99	GIINIQDEINDYMK		cleaved M-G@N-term	-0.000265152	1664.81	833.411	1664.81	833.411	2	22	1.1.1.2244.9
				fig|11428.3.peg.70	2	99	GYRDGALIAAAYVSITDLADYNPNLGLTNEGNGVAHFK	Deamidated(N)@32	missed R-D@3	0.00673949	3980.96	996.248	3980.95	996.246	4	27	1.1.1.2975.2
				fig|11428.3.peg.70	2	99	MGIINIQDEINDYMK			-0.00722397	1795.84	898.928	1795.85	898.932	2	24	1.1.1.2436.5
				fig|11428.3.peg.70	2	99	RPASNTYLIQGSLAPNVTLINDR			0.00133757	2512.34	838.454	2512.34	838.454	3	25	1.1.1.1960.9
				fig|11428.3.peg.70	2	99	RPASNTYLIQGSLAPNVTLINDRK		missed R-K@23	0.00951835	2640.44	881.155	2640.43	881.152	3	22	1.1.1.1872.15
				fig|11428.3.peg.70	2	99	RPASNTYLIQGSLAPNVTLINDRKE		cleaved E-G@C-term; missed R-K@23; missed K-E@24	0.015369	2769.49	693.38	2769.48	693.377	4	19	1.1.1.1877.10
				fig|11428.3.peg.70	2	99	SYIQVTEYPMDDNGR			0.000336386	1786.78	894.399	1786.78	894.399	2	18	1.1.1.1817.23
				fig|11428.3.peg.70	2	99	SYIQVTEYPMDDNGRR	Deamidated(N)@13	cleaved R-P@C-term; missed R-R@15	0.011257	1943.88	648.967	1943.87	648.963	3	17	1.1.1.1760.15
				fig|11428.3.peg.70	2	99	SYIQVTEYPMDDNGRRPASNTYLIQGSLAPNVTLINDR	Deamidated(N)@20	missed R-R@15	0.000563695	4282.09	1071.53	4282.1	1071.53	4	27	1.1.1.2130.2
				fig|11428.3.peg.70	2	99	SYIQVTEYPMDDNGRRPASNTYLIQGSLAPNVTLINDRK	Deamidated(N)@20	missed R-R@15; missed R-K@38	0.00954803	4410.2	883.048	4410.19	883.046	5	20	1.1.1.2013.6
				fig|11428.3.peg.70	2	99	VFNESVTPQYDVIPTEPVNNHITTK			0.00672724	2841.43	948.149	2841.42	948.147	3	19	1.1.1.1872.16
				fig|11428.3.peg.70	2	99	VIDNPGTSEVTSTVTFTWTETDTVTSAVTK			-0.00757552	3186.54	1063.19	3186.55	1063.19	3	19	1.1.1.3747.3
				fig|11428.3.peg.70	1.16115	95.08	STYDSSFK			-0.00139071	933.407	467.711	933.408	467.711	2	8	1.1.1.1504.11
				fig|11428.3.peg.70	1.14874	94.89	GMYGATSVKSTYDSSFK		missed K-S@9	0.00162005	1827.84	610.286	1827.83	610.286	3	13	1.1.1.1674.18
				fig|11428.3.peg.70	0.325139	97.21	GSLAPNVTLINDR		cleaved Q-G@N-term	0.00316464	1368.74	685.377	1368.74	685.375	2	13	1.1.1.1810.6
				fig|11428.3.peg.70	0.0181814	22.21	GMYGATSVK	Oxidation(M)@2		-0.00423941	928.428	465.221	928.432	465.223	2	7	1.1.1.1410.6
				fig|11428.3.peg.70	0.00966115	77.35	TWTDTTTVK	Dioxidation(W)@2		-0.00194974	1083.51	542.76	1083.51	542.761	2	12	1.1.1.1510.14
		2	Vip2Ac-like_1	fig|11428.3.peg.6	2	99	AKEWAESNFKDWKK		missed K-E@2; missed K-D@10; missed K-K@13	0.00385572	1765.88	589.635	1765.88	589.634	3	12	1.1.1.1687.16
				fig|11428.3.peg.6	2	99	EGVLGYYDTISK			0.0046425	1343.67	672.84	1343.66	672.838	2	19	1.1.1.1945.4
				fig|11428.3.peg.6	2	99	GTSIGHLNEDHIITER			0.00552749	1790.9	597.973	1790.89	597.971	3	23	1.1.1.1700.12
				fig|11428.3.peg.6	2	99	IDNLYASASIDR			0.00289789	1336.67	669.34	1336.66	669.338	2	17	1.1.1.1794.9
				fig|11428.3.peg.6	2	99	IDNLYASASIDRTETIIK		missed R-T@12	-0.000712142	2022.06	675.028	2022.06	675.028	3	17	1.1.1.1932.4
				fig|11428.3.peg.6	2	99	LKEMNDKIDRYDQISGK		missed K-E@2; missed K-I@7; missed R-Y@10	0.00854273	2052.04	685.02	2052.03	685.018	3	17	1.1.1.1647.13
				fig|11428.3.peg.6	2	99	QLVSNVPNNLLLNIMK	Gln->pyro-Glu@N-term		-0.00040095	1791.99	897.003	1791.99	897.003	2	20	1.1.1.3535.2
				fig|11428.3.peg.6	2	99	SEDLGYADKYFYAANDSR		missed K-Y@9	0.00719882	2083.92	695.647	2083.91	695.645	3	24	1.1.1.1920.9
				fig|11428.3.peg.6	0.269218	62.75	YFYAANDSR			0.00246349	1105.49	553.75	1105.48	553.749	2	8	1.1.1.1642.17
				fig|11428.3.peg.6	0.104025	69.29	TSIVVVNGR	Deamidated(N)@7		-0.0019591	944.527	473.271	944.529	473.272	2	9	1.1.1.1665.10
			Sip1Aa-like_1	fig|11428.3.peg.27	2	99	AIDLSNIR			-0.0020478	900.501	451.258	900.503	451.259	2	12	1.1.1.1786.10
				fig|11428.3.peg.27	2	99	FTVPSQEVTLAPGHK			0.000701422	1609.85	537.623	1609.85	537.623	3	20	1.1.1.1804.9
				fig|11428.3.peg.27	2	99	NYIKNGDTLYIETPAK	Deamidated(N)@5	missed K-N@4	0.00515311	1839.93	920.973	1839.93	920.97	2	18	1.1.1.1817.15
				fig|11428.3.peg.27	2	99	TGDTIYNGVSELK	Deamidated(N)@7		4.31136e-05	1396.67	699.343	1396.67	699.343	2	18	1.1.1.1791.12
				fig|11428.3.peg.27	2	99	VAALNDMNISNVNYTSK			0.00259322	1852.9	927.458	1852.9	927.457	2	25	1.1.1.1896.8
				fig|11428.3.peg.27	0.0899095	91.82	ETTSSHAVTNQQPITQR		cleaved A-E@N-term	0.00126768	1896.93	633.317	1896.93	633.317	3	12	1.1.1.1517.11
			Cry23Aa-like	fig|11428.3.peg.70	2	99	GEGYIEGAQGLR			0.0011138	1248.61	625.313	1248.61	625.312	2	20	1.1.1.1727.8
				fig|11428.3.peg.70	2	99	GIINIQDEINDYMK		cleaved M-G@N-term	-0.00111956	1664.81	833.411	1664.81	833.411	2	23	1.1.1.2474.6
				fig|11428.3.peg.70	2	99	GMYGATSVK			-0.00233914	912.435	457.225	912.438	457.226	2	14	1.1.1.1566.3
				fig|11428.3.peg.70	2	99	GMYGATSVKSTYDSSFK		missed K-S@9	0.00111488	1827.84	914.925	1827.83	914.925	2	21	1.1.1.1732.25
				fig|11428.3.peg.70	2	99	MGIINIQDEINDYMK			-0.00122168	1795.85	898.931	1795.85	898.932	2	23	1.1.1.2696.3
				fig|11428.3.peg.70	2	99	RPASNTYLIQGSLAPNVTLINDRK		missed R-K@23	0.0124732	2640.45	881.156	2640.43	881.152	3	24	1.1.1.1936.6
				fig|11428.3.peg.70	2	99	SYIQVTEYPMDDNGR			-0.000526806	1786.78	894.399	1786.78	894.399	2	18	1.1.1.1872.11
				fig|11428.3.peg.70	2	99	SYIQVTEYPMDDNGRRPASNTYLIQGSLAPNVTLINDR	Deamidated(N)@20	missed R-R@15	0.0194575	4282.11	1071.54	4282.1	1071.53	4	27	1.1.1.2334.6
				fig|11428.3.peg.70	2	99	TWTDTTTVKAPPR		missed K-A@9	-0.000205887	1472.76	737.388	1472.76	737.388	2	11	1.1.1.1643.24
				fig|11428.3.peg.70	2	99	VFNESVTPQYDVIPTEPVNNHITTK			-0.0343851	2841.38	569.284	2841.42	569.291	5	20	1.1.1.1941.5
				fig|11428.3.peg.70	1.29243	99	SYIQVTEYPMDDNGRR	Deamidated(N)@13	cleaved R-P@C-term; missed R-R@15	0.00460847	1943.87	648.965	1943.87	648.963	3	15	1.1.1.1820.20
				fig|11428.3.peg.70	0.130182	35.72	STYDSSFK			-3.97723e-05	933.408	467.711	933.408	467.711	2	7	1.1.1.1570.14
				fig|11428.3.peg.70	0.101824	97.88	TWTDTTTVK	Dioxidation(W)@2		-0.00293282	1083.51	542.76	1083.51	542.761	2	13	1.1.1.1576.12
				fig|11428.3.peg.70	0.00130484	19.89	ESVTPQYDVIPTEPVNNHITTK		cleaved N-E@N-term	0.00204863	2481.24	828.087	2481.24	828.087	3	12	1.1.1.1857.18
		3	Vip2Ac-like_1	fig|11428.3.peg.6	2	99	AKEWAESNFKDWKK		missed K-E@2; missed K-D@10; missed K-K@13	0.00133961	1765.88	589.634	1765.88	589.634	3	20	1.1.1.1488.13
				fig|11428.3.peg.6	2	99	DSTEFFAGVFNYLYSPK			-1.90549e-05	1983.93	992.97	1983.93	992.97	2	23	1.1.1.2700.5
				fig|11428.3.peg.6	2	99	GTSIGHLNEDHIITER			-0.00031657	1790.89	597.971	1790.89	597.971	3	24	1.1.1.1502.16
				fig|11428.3.peg.6	2	99	IDNLYASASIDR			-0.00279686	1336.66	669.337	1336.66	669.338	2	19	1.1.1.1585.4
				fig|11428.3.peg.6	2	99	LKEMNDKIDRYDQISGK		missed K-E@2; missed K-I@7; missed R-Y@10	0.000971679	2052.03	685.018	2052.03	685.018	3	19	1.1.1.1452.15
				fig|11428.3.peg.6	2	99	QLVSNVPNNLLLNIMK			-0.00382568	1809.01	905.514	1809.02	905.516	2	22	1.1.1.2226.2
				fig|11428.3.peg.6	2	99	SAPILLSLTLAK			-0.000265617	1225.76	613.889	1225.76	613.89	2	18	1.1.1.2119.3
				fig|11428.3.peg.6	0.454693	82.52	TLFIQIDHYGHK			-0.00755165	1470.75	491.259	1470.76	491.261	3	12	1.1.1.1602.5
				fig|11428.3.peg.6	0.441291	81.86	TSIVVVNGR			-0.000721341	943.544	472.779	943.545	472.78	2	9	1.1.1.1443.5
				fig|11428.3.peg.6	0.0560111	26.1	FKEITGLRK		missed K-E@2; missed R-K@8	3.31254e-05	1090.65	364.557	1090.65	364.557	3	7	1.1.1.1387.4
			Sip1Aa-like_1	fig|11428.3.peg.27	2	99	AETTSSHAVTNQQPITQR		cleaved A-A@N-term	0.00159034	1967.97	656.996	1967.97	656.996	3	17	1.1.1.1340.23
				fig|11428.3.peg.27	2	99	FISWFKDNLASPGGYDSIAEQMGLK		missed K-D@6	0.00191579	2773.34	925.455	2773.34	925.455	3	23	1.1.1.2248.8
				fig|11428.3.peg.27	2	99	TGDTIYNGVSELK			2.31085e-05	1395.69	698.851	1395.69	698.851	2	20	1.1.1.1611.16
				fig|11428.3.peg.27	0.767004	99	QRAESYIDIVHNR	Gln->pyro-Glu@N-term	cleaved T-Q@N-term; missed R-A@2	0.00493743	1582.79	528.604	1582.79	528.602	3	16	1.1.1.1597.8
				fig|11428.3.peg.27	0.0154727	75.26	ETTSSHAVTNQQPITQR		cleaved A-E@N-term	0.00438643	1896.93	633.318	1896.93	633.317	3	9	1.1.1.1333.24
			Cry23Aa-like	fig|11428.3.peg.70	2	99	GEGYIEGAQGLR	Deamidated(Q)@9		0.00217397	1249.6	625.805	1249.59	625.804	2	18	1.1.1.1554.13
				fig|11428.3.peg.70	2	99	GIINIQDEINDYMK		cleaved M-G@N-term	-0.00115195	1664.81	833.411	1664.81	833.411	2	19	1.1.1.2159.4
				fig|11428.3.peg.70	2	99	GIINIQDEINDYMKGMYGATSVK	Deamidated(N)@10	cleaved M-G@N-term; missed K-G@14	0.00802387	2560.23	854.416	2560.22	854.414	3	19	1.1.1.2051.4
				fig|11428.3.peg.70	2	99	GMYGATSVKSTYDSSFK		missed K-S@9	-0.00340121	1827.83	914.923	1827.83	914.925	2	20	1.1.1.1528.23
				fig|11428.3.peg.70	2	99	MGIINIQDEINDYMK			-0.00442586	1795.84	898.929	1795.85	898.932	2	22	1.1.1.2213.3
				fig|11428.3.peg.70	2	99	PASNTYLIQGSLAPNVTLINDR		cleaved R-P@N-term	-0.0014324	2356.24	786.42	2356.24	786.42	3	19	1.1.1.2058.9
				fig|11428.3.peg.70	2	99	SYIQVTEYPMDDNGRRPASNTYLIQGSLAPNVTLINDRK	Deamidated(N)@20	missed R-R@15; missed R-K@38	0.0108677	4410.2	883.048	4410.19	883.046	5	20	1.1.1.1992.10
				fig|11428.3.peg.70	2	99	TWTDTTTVK			-0.00259694	1051.52	526.765	1051.52	526.767	2	14	1.1.1.1429.15
				fig|11428.3.peg.70	2	99	TWTDTTTVKAPPR		missed K-A@9	0.000690157	1472.76	737.389	1472.76	737.388	2	17	1.1.1.1449.23
				fig|11428.3.peg.70	2	99	VFNESVTPQYDVIPTEPVNNHITTK			-0.00199101	2841.42	948.146	2841.42	948.147	3	18	1.1.1.1789.6
				fig|11428.3.peg.70	1.55284	99	FKGEGYIEGAQGLR		cleaved H-F@N-term; missed K-G@2	-0.00227799	1523.77	762.893	1523.77	762.894	2	14	1.1.1.1559.17
	Crystal 72 h	1	Cry23Aa-like	fig|11428.3.peg.70	2	99	DGALIAAAYVSITDLADYNPNLGLTNEGNGVAHFK	Deamidated(N)@29		0.0153162	3604.78	902.203	3604.77	902.199	4	26	1.1.1.4142.2
				fig|11428.3.peg.70	2	99	DGALIAAAYVSITDLADYNPNLGLTNEGNGVAHFKGEGYIEGAQGLR	Deamidated(N)@29	missed K-G@35	0.0233033	4835.39	1209.86	4835.37	1209.85	4	28	1.1.1.4549.2
				fig|11428.3.peg.70	2	99	ESVTPQYDVIPTEPVNNHITTK		cleaved N-E@N-term	-0.00941625	2481.23	828.084	2481.24	828.087	3	21	1.1.1.1697.2
				fig|11428.3.peg.70	2	99	FKGEGYIEGAQGLR		cleaved H-F@N-term; missed K-G@2	-0.00180246	1523.77	508.931	1523.77	508.932	3	19	1.1.1.1585.5
				fig|11428.3.peg.70	2	99	GEGYIEGAQGLR			-0.00404747	1248.61	625.31	1248.61	625.312	2	16	1.1.1.1581.10
				fig|11428.3.peg.70	2	99	GIINIQDEINDYMK	Ammonia-loss(N)@10	cleaved M-G@N-term	-0.00020426	1647.78	824.898	1647.78	824.898	2	20	1.1.1.2435.3
				fig|11428.3.peg.70	2	99	GIINIQDEINDYMKGMYGATSVK		cleaved M-G@N-term; missed K-G@14	0.00905391	2559.24	854.089	2559.23	854.086	3	19	1.1.1.3028.3
				fig|11428.3.peg.70	2	99	GMYGATSVK			-0.000647224	912.437	457.226	912.438	457.226	2	14	1.1.1.1400.4
				fig|11428.3.peg.70	2	99	GMYGATSVKSTYDSSFK		missed K-S@9	-0.0129859	1827.82	914.918	1827.83	914.925	2	17	1.1.1.1529.26
				fig|11428.3.peg.70	2	99	GYRDGALIAAAYVSITDLADYNPNLGLTNEGNGVAHFK	Deamidated(N)@32	missed R-D@3	0.0175939	3980.97	996.25	3980.95	996.246	4	27	1.1.1.3411.4
				fig|11428.3.peg.70	2	99	IQDEINDYMK		cleaved N-I@N-term	-0.00296181	1267.57	634.793	1267.58	634.795	2	15	1.1.1.1615.11
				fig|11428.3.peg.70	2	99	MGIINIQDEINDYMK			-0.00420269	1795.84	898.929	1795.85	898.932	2	23	1.1.1.2814.2
				fig|11428.3.peg.70	2	99	PASNTYLIQGSLAPNVTLINDRK		cleaved R-P@N-term; missed R-K@22	0.00570482	2484.34	829.12	2484.33	829.118	3	26	1.1.1.2128.2
				fig|11428.3.peg.70	2	99	PNLGLTNEGNGVAHFK	Deamidated(N)@10	cleaved N-P@N-term	0.00168773	1667.83	556.95	1667.83	556.95	3	25	1.1.1.1628.3
				fig|11428.3.peg.70	2	99	RPASNTYLIQGSLAPNVTLINDR			-0.0005183	2512.34	838.454	2512.34	838.454	3	25	1.1.1.2134.2
				fig|11428.3.peg.70	2	99	RPASNTYLIQGSLAPNVTLINDRK		missed R-K@23	-0.00495992	2640.43	881.15	2640.43	881.152	3	23	1.1.1.1822.7
				fig|11428.3.peg.70	2	99	STYDSSFKVFNESVTPQYDVIPTEPVNNHITTK		missed K-V@8	0.00325082	3756.82	940.212	3756.82	940.211	4	17	1.1.1.2189.2
				fig|11428.3.peg.70	2	99	SYIQVTEYPMDDNGR			-0.00627764	1786.78	894.396	1786.78	894.399	2	19	1.1.1.1724.3
				fig|11428.3.peg.70	2	99	SYIQVTEYPMDDNGRR	Deamidated(N)@13	cleaved R-P@C-term; missed R-R@15	-0.00697134	1943.86	972.938	1943.87	972.941	2	21	1.1.1.1637.16
				fig|11428.3.peg.70	2	99	SYIQVTEYPMDDNGRRPASN	Deamidated(N)@13	cleaved N-T@C-term; missed R-R@15	-0.00520039	2313.03	772.017	2313.03	772.018	3	17	1.1.1.1652.10
				fig|11428.3.peg.70	2	99	SYIQVTEYPMDDNGRRPASNTYLIQGSLAPNVTLINDR	Deamidated(N)@20	missed R-R@15	0.0152146	4282.11	1071.54	4282.1	1071.53	4	27	1.1.1.2460.3
				fig|11428.3.peg.70	2	99	SYIQVTEYPMDDNGRRPASNTYLIQGSLAPNVTLINDRK	Deamidated(N)@13	missed R-R@15; missed R-K@38	0.00864548	4410.2	1103.56	4410.19	1103.56	4	30	1.1.1.2224.2
				fig|11428.3.peg.70	2	99	TDTRTWTDTTTVK		missed R-T@4	-0.00459478	1524.74	509.253	1524.74	509.255	3	22	1.1.1.1448.2
				fig|11428.3.peg.70	2	99	TDTRTWTDTTTVKAPPR		missed R-T@4; missed K-A@13	-0.00153993	1945.98	487.503	1945.99	487.504	4	21	1.1.1.1455.11
				fig|11428.3.peg.70	2	99	TNVEVAYIIQTGNYNVPVNVESDMTGTLFCR	Carbamidomethyl(C)@30		0.0170272	3503.69	1168.9	3503.67	1168.9	3	22	1.1.1.4653.2
				fig|11428.3.peg.70	2	99	TWTDTTTVK			-0.00174558	1051.52	526.766	1051.52	526.767	2	15	1.1.1.1449.3
				fig|11428.3.peg.70	2	99	TWTDTTTVKAPPR		missed K-A@9	-0.00140296	1472.76	491.928	1472.76	491.928	3	17	1.1.1.1466.7
				fig|11428.3.peg.70	2	99	TWTETDTVTSAVTK		cleaved F-T@N-term	-0.00753112	1538.74	770.377	1538.75	770.38	2	22	1.1.1.1611.18
				fig|11428.3.peg.70	2	99	VFNESVTPQYDVIPTEPVNNHITTK			-0.0106577	2841.41	948.143	2841.42	948.147	3	19	1.1.1.1825.3
				fig|11428.3.peg.70	2	99	VGGSVSSKATF	Delta:H(4)C(2)(K)@8	cleaved F-K@C-term; missed K-A@8	-0.00371164	1066.56	534.288	1066.57	534.29	2	15	1.1.1.1461.13
				fig|11428.3.peg.70	2	99	VIDNPGTSEVTSTVTFTWTETDTVTSAVTK			-0.00170285	3186.55	1063.19	3186.55	1063.19	3	20	1.1.1.2704.2
				fig|11428.3.peg.70	2	99	VSAEYNYSTTETTTK		cleaved T-V@N-term	-0.00654568	1693.76	847.888	1693.77	847.891	2	13	1.1.1.1455.26
				fig|11428.3.peg.70	1.5376	97.06	STYDSSFK			-0.00127127	933.407	467.711	933.408	467.711	2	12	1.1.1.1395.4
				fig|11428.3.peg.70	0.928118	99	GSLAPNVTLINDRK		cleaved Q-G@N-term; missed R-K@13	-0.00683355	1496.82	749.419	1496.83	749.423	2	14	1.1.1.1593.11
				fig|11428.3.peg.70	0.422508	62.16	GYKVGGSVSSK		missed K-V@3	0.00347547	1067.56	356.862	1067.56	356.861	3	6	1.1.1.1296.2
				fig|11428.3.peg.70	0.350665	97.94	SLAPNVTLINDRK		cleaved G-S@N-term; missed R-K@12	-0.000519986	1439.81	480.944	1439.81	480.944	3	14	1.1.1.1589.7
				fig|11428.3.peg.70	0.0670192	94.14	SYIQVTEYPMDDNGRRPA	Deamidated(N)@13	cleaved A-S@C-term; missed R-R@15	0.000811574	2111.96	704.994	2111.96	704.993	3	14	1.1.1.1653.9
				fig|11428.3.peg.70	0.0472076	85.59	VIPTEPVNNHITTK		cleaved D-V@N-term	-0.00134419	1561.85	521.622	1561.85	521.623	3	13	1.1.1.1462.8
				fig|11428.3.peg.70	0.0301184	68.52	SVKSTYDSSFK		cleaved T-S@N-term; missed K-S@3	0.00219626	1247.61	416.876	1247.6	416.875	3	8	1.1.1.1378.5
				fig|11428.3.peg.70	0.00480371	63.06	GVAHFKGEGYIEGAQGLR	Deamidated(Q)@15	cleaved N-G@N-term; missed K-G@6	0.0289357	1888.97	473.25	1888.94	473.243	4	13	1.1.1.1578.7
				fig|11428.3.peg.70	0.00305075	62.61	TDTTTVK		cleaved W-T@N-term	5.19319e-05	764.392	383.203	764.392	383.203	2	9	1.1.1.1085.2
				fig|11428.3.peg.70	0.000869459	98.53	MGIINIQDEINDYMKGMYGATSVKSTYDSSFK	Deamidated(N)@5; Deamidated(N)@11; Oxidation(M)@14; Dioxidation(M)@17	missed K-G@15; missed K-S@24	0.0349958	3655.66	1219.56	3655.63	1219.55	3	15	1.1.1.1556.26
				fig|11428.3.peg.70	0.000434512	29.24	WTETDTVTSAVTK		cleaved T-W@N-term	-0.00396285	1437.69	719.855	1437.7	719.857	2	12	1.1.1.1575.18
		2	Cry23Aa-like	fig|11428.3.peg.70	2	99	DGALIAAAYVSITDLADYN		cleaved N-P@C-term	-0.000119111	1954.95	978.483	1954.95	978.483	2	19	1.1.1.5288.2
				fig|11428.3.peg.70	2	99	DGALIAAAYVSITDLADYNPNLGLTNEGNGVAHFK	Deamidated(N)@29		0.0049325	3604.77	1202.6	3604.77	1202.6	3	22	1.1.1.3776.2
				fig|11428.3.peg.70	2	99	ESVTPQYDVIPTEPVNNHITTK		cleaved N-E@N-term	-0.00118336	2481.24	828.087	2481.24	828.087	3	18	1.1.1.1686.3
				fig|11428.3.peg.70	2	99	FKGEGYIEGAQGLR		cleaved H-F@N-term; missed K-G@2	0.000308506	1523.77	508.932	1523.77	508.932	3	17	1.1.1.1596.5
				fig|11428.3.peg.70	2	99	GEGYIEGAQGLR			-0.00273947	1248.61	625.311	1248.61	625.312	2	19	1.1.1.1548.13
				fig|11428.3.peg.70	2	99	GIINIQDEINDYMK	Dethiomethyl(M)@13	cleaved M-G@N-term	-0.00317328	1616.8	539.941	1616.8	539.942	3	20	1.1.1.1811.3
				fig|11428.3.peg.70	2	99	GMYGATSVK			0.0032629	912.441	457.228	912.438	457.226	2	15	1.1.1.1398.2
				fig|11428.3.peg.70	2	99	GMYGATSVKSTYDSSFK	Dethiomethyl(M)@2	missed K-S@9	0.00374314	1779.84	594.286	1779.83	594.284	3	17	1.1.1.1450.18
				fig|11428.3.peg.70	2	99	IEGAQGLR		cleaved Y-I@N-term	0.00150294	842.462	422.238	842.461	422.238	2	13	1.1.1.1376.2
				fig|11428.3.peg.70	2	99	LGLTNEGNGVAHFK	Deamidated(N)@8	cleaved N-L@N-term	-0.00630095	1456.72	729.37	1456.73	729.373	2	18	1.1.1.1592.15
				fig|11428.3.peg.70	2	99	MGIINIQDEINDYMK			0.000210948	1795.85	898.932	1795.85	898.932	2	23	1.1.1.3053.2
				fig|11428.3.peg.70	2	99	PNLGLTNEGNGVAHFK	Deamidated(N)@10	cleaved N-P@N-term	-0.0222895	1667.8	834.909	1667.83	834.921	2	21	1.1.1.1641.13
				fig|11428.3.peg.70	2	99	RPASNTYLIQGSLAPNVTLINDR			-0.00690281	2512.33	838.452	2512.34	838.454	3	26	1.1.1.2133.2
				fig|11428.3.peg.70	2	99	SVKSTYDSSFK		cleaved T-S@N-term; missed K-S@3	0.00607997	1247.61	416.877	1247.6	416.875	3	13	1.1.1.1380.8
				fig|11428.3.peg.70	2	99	SVTPQYDVIPTEPVNNHITTK		cleaved E-S@N-term	-0.000101081	2352.2	785.073	2352.2	785.073	3	18	1.1.1.1677.7
				fig|11428.3.peg.70	2	99	SYIQVTEYPMDDNGR	Deamidated(N)@13		-0.00977095	1787.76	894.886	1787.77	894.891	2	20	1.1.1.1751.2
				fig|11428.3.peg.70	2	99	SYIQVTEYPMDDNGRR	Deamidated(N)@13	cleaved R-P@C-term; missed R-R@15	0.000646881	1943.87	648.964	1943.87	648.963	3	19	1.1.1.1662.7
				fig|11428.3.peg.70	2	99	SYIQVTEYPMDDNGRRPASN	Deamidated(N)@13	cleaved N-T@C-term; missed R-R@15	-0.001842	2313.03	772.018	2313.03	772.018	3	17	1.1.1.1667.3
				fig|11428.3.peg.70	2	99	SYIQVTEYPMDDNGRRPASNTYLIQGSLAPNVTLINDRK	Deamidated(N)@13	missed R-R@15; missed R-K@38	0.00131047	4410.19	1103.56	4410.19	1103.56	4	24	1.1.1.2283.2
				fig|11428.3.peg.70	2	99	TDTRTWTDTTTVK		missed R-T@4	-0.00582597	1524.74	763.375	1524.74	763.378	2	18	1.1.1.1437.24
				fig|11428.3.peg.70	2	99	TNVEVAYIIQTGNYNVPVNVESDMTGTLFCR	Deamidated(N)@15; Carbamidomethyl(C)@30		0.0267022	3504.68	877.178	3504.65	877.171	4	19	1.1.1.5213.3
				fig|11428.3.peg.70	2	99	TWTDTTTVK			0.000889112	1051.52	526.767	1051.52	526.767	2	15	1.1.1.1450.14
				fig|11428.3.peg.70	2	99	TWTDTTTVKAPPR		missed K-A@9	-0.000428461	1472.76	737.388	1472.76	737.388	2	15	1.1.1.1477.25
				fig|11428.3.peg.70	2	99	TWTETDTVTSAVTK		cleaved F-T@N-term	-0.00539902	1538.74	770.378	1538.75	770.38	2	21	1.1.1.1620.13
				fig|11428.3.peg.70	2	99	VFNESVTPQYDVIPTEPVNNHITTK			-0.0106648	2841.41	948.143	2841.42	948.147	3	20	1.1.1.1867.2
				fig|11428.3.peg.70	2	99	VGGSVSSKATF	Delta:H(4)C(2)(K)@8	cleaved F-K@C-term; missed K-A@8	-0.000882899	1066.57	534.29	1066.57	534.29	2	17	1.1.1.1476.17
				fig|11428.3.peg.70	2	99	VIDNPGTSEVTSTVTFTWTETDTVTSAVTK			0.00776267	3186.55	1063.19	3186.55	1063.19	3	25	1.1.1.5194.2
				fig|11428.3.peg.70	1.65758	99	IQDEINDYMK		cleaved N-I@N-term	-0.00246147	1267.57	634.794	1267.58	634.795	2	15	1.1.1.1626.7
				fig|11428.3.peg.70	1.24413	99	TSVKSTYDSSFK		cleaved A-T@N-term; missed K-S@4	0.00199867	1348.65	675.334	1348.65	675.333	2	12	1.1.1.1405.5
				fig|11428.3.peg.70	1.01773	99	SYIQVTEYPMDDNGRRPA	Deamidated(N)@13	cleaved A-S@C-term; missed R-R@15	-0.00279706	2111.96	704.992	2111.96	704.993	3	16	1.1.1.1673.6
				fig|11428.3.peg.70	0.68403	99	GYIEGAQGLR		cleaved E-G@N-term	-0.00177425	1062.54	532.279	1062.55	532.28	2	14	1.1.1.1528.14
				fig|11428.3.peg.70	0.617983	76.35	STYDSSFK			0.00258058	933.411	467.713	933.408	467.711	2	11	1.1.1.1433.7
				fig|11428.3.peg.70	0.614394	76.1	VGGSVSSK			0.00405428	719.385	360.7	719.381	360.698	2	8	1.1.1.1070.2
				fig|11428.3.peg.70	0.341989	98.54	EGYIEGAQGLR		cleaved G-E@N-term	-0.00363939	1191.58	596.8	1191.59	596.801	2	14	1.1.1.1549.11
				fig|11428.3.peg.70	0.143876	90.01	YSTTETTTK		cleaved N-Y@N-term	0.00264865	1030.48	516.25	1030.48	516.248	2	8	1.1.1.1251.9
				fig|11428.3.peg.70	0.0660068	86.77	SLAPNVTLINDRK		cleaved G-S@N-term; missed R-K@12	-0.00135685	1439.81	480.943	1439.81	480.944	3	13	1.1.1.1600.5
				fig|11428.3.peg.70	0.0145735	73.15	GLTNEGNGVAHFK	Deamidated(N)@7	cleaved L-G@N-term	0.00730027	1343.65	448.892	1343.65	448.89	3	12	1.1.1.1499.5
				fig|11428.3.peg.70	0.00833099	29.39	NHITTK		cleaved N-N@N-term	0.00570071	712.392	357.204	712.387	357.201	2	8	1.1.1.969.2
				fig|11428.3.peg.70	0.000434512	94.95	MGIINIQDEINDYMKGMYGATSVKSTYDSSFK	Deamidated(N)@5; Deamidated(N)@11; Oxidation(M)@14; Dioxidation(M)@17	missed K-G@15; missed K-S@24	0.0369841	3655.66	1219.56	3655.63	1219.55	3	14	1.1.1.1570.22
		3	Cry23Aa-like	fig|11428.3.peg.70	2	99	DGALIAAAYVSITDLADYNPNLGLTNEGNGVAHFK	Deamidated(N)@29		-0.00482878	3604.76	902.198	3604.77	902.199	4	28	1.1.1.4779.2
				fig|11428.3.peg.70	2	99	DGALIAAAYVSITDLADYNPNLGLTNEGNGVAHFKGEGYIEGAQGLR	Deamidated(N)@29	missed K-G@35	0.00502087	4835.37	1209.85	4835.37	1209.85	4	28	1.1.1.4964.2
				fig|11428.3.peg.70	2	99	GEGYIEGAQGLR			-0.00359108	1248.61	625.31	1248.61	625.312	2	19	1.1.1.1504.18
				fig|11428.3.peg.70	2	99	GIINIQDEINDYMK	Ammonia-loss(N)@10	cleaved M-G@N-term	0.00109868	1647.78	824.899	1647.78	824.898	2	20	1.1.1.2400.2
				fig|11428.3.peg.70	2	99	GIINIQDEINDYMKGMYGATSVK		cleaved M-G@N-term; missed K-G@14	-0.00159342	2559.23	854.085	2559.23	854.086	3	17	1.1.1.3065.2
				fig|11428.3.peg.70	2	99	GMYGATSVK			-0.000543798	912.437	457.226	912.438	457.226	2	13	1.1.1.1355.3
				fig|11428.3.peg.70	2	99	GMYGATSVKSTYDSSFK		missed K-S@9	-0.00183185	1827.83	610.285	1827.83	610.286	3	18	1.1.1.1504.17
				fig|11428.3.peg.70	2	99	MGIINIQDEINDYMK			0.00249839	1795.85	898.933	1795.85	898.932	2	23	1.1.1.2799.2
				fig|11428.3.peg.70	2	99	SVTPQYDVIPTEPVNNHITTK		cleaved E-S@N-term	0.00307553	2352.2	785.074	2352.2	785.073	3	17	1.1.1.1638.6
				fig|11428.3.peg.70	2	99	SYIQVTEYPMDDNGR	Deamidated(N)@13		-0.0010222	1787.77	894.89	1787.77	894.891	2	20	1.1.1.1699.5
				fig|11428.3.peg.70	2	99	SYIQVTEYPMDDNGRR	Deamidated(N)@13	cleaved R-P@C-term; missed R-R@15	0.00237618	1943.87	648.964	1943.87	648.963	3	17	1.1.1.1619.11
				fig|11428.3.peg.70	2	99	TDTRTWTDTTTVK		missed R-T@4	-0.00266787	1524.74	509.254	1524.74	509.255	3	22	1.1.1.1405.12
				fig|11428.3.peg.70	2	99	TDTRTWTDTTTVKAPPR		missed R-T@4; missed K-A@13	0.00276842	1945.99	649.67	1945.99	649.669	3	12	1.1.1.1433.16
				fig|11428.3.peg.70	2	99	TWTDTTTVKAPPR		missed K-A@9	-0.000225749	1472.76	491.928	1472.76	491.928	3	10	1.1.1.1419.6
				fig|11428.3.peg.70	2	99	VFNESVTPQYDVIPTEPVNNHITTK			0.00432762	2841.42	948.148	2841.42	948.147	3	19	1.1.1.1764.2
				fig|11428.3.peg.70	2	99	VIDNPGTSEVTSTVTFTWTETDTVTSAVTK			-0.00295284	3186.54	1063.19	3186.55	1063.19	3	21	1.1.1.4694.2
				fig|11428.3.peg.70	1.74473	98.4	TWTDTTTVK			-0.00221166	1051.52	526.765	1051.52	526.767	2	13	1.1.1.1430.18
				fig|11428.3.peg.70	1.69897	99	IQDEINDYMK		cleaved N-I@N-term	0.00232189	1267.58	634.796	1267.58	634.795	2	15	1.1.1.1586.14
				fig|11428.3.peg.70	1.12494	93.26	VGGSVSSK			-0.00252645	719.379	360.697	719.381	360.698	2	8	1.1.1.1054.2
				fig|11428.3.peg.70	1.02228	99	SYIQVTEYPMDDNGRRPA	Deamidated(N)@13	cleaved A-S@C-term; missed R-R@15	0.00409799	2111.96	704.995	2111.96	704.993	3	16	1.1.1.1634.4
				fig|11428.3.peg.70	0.847712	98.73	TWTETDTVTSAVTK		cleaved F-T@N-term	-0.00348625	1538.74	770.379	1538.75	770.38	2	14	1.1.1.1581.20
				fig|11428.3.peg.70	0.428291	98.33	FKGEGYIEGAQGLR		cleaved H-F@N-term; missed K-G@2	0.000756439	1523.77	508.932	1523.77	508.932	3	14	1.1.1.1553.8
				fig|11428.3.peg.70	0.278189	50.22	STYDSSFK			-0.000311075	933.408	467.711	933.408	467.711	2	10	1.1.1.1366.9
				fig|11428.3.peg.70	0.134304	95.14	SYIQVTEYPMDDNGRRPASN	Deamidated(N)@13	cleaved N-T@C-term; missed R-R@15	0.00384867	2313.04	772.02	2313.03	772.018	3	14	1.1.1.1614.9
				fig|11428.3.peg.70	0.0452752	73.33	YSTTETTTK		cleaved N-Y@N-term	0.00306804	1030.49	516.25	1030.48	516.248	2	8	1.1.1.1218.5
O-V84.2	Supernatant 24 h	1	Vip4Aa-like_1	fig|1428.368.peg.1872	2	99	AAGHMDTAIKQEAR		missed K-Q@10	-0.00235918	1497.73	500.252	1497.74	500.253	3	22	1.1.1.1440.4
				fig|1428.368.peg.1872	2	99	AFYYYGGSSSYR			-0.00275982	1419.61	710.811	1419.61	710.812	2	15	1.1.1.1773.6
				fig|1428.368.peg.1872	2	99	DYRDPEDLTPEVTLGDAIAMAFDTTEKDGELYYK		missed R-D@3; missed K-D@27	0.0264376	3880.81	971.211	3880.79	971.204	4	28	1.1.1.4479.3
				fig|1428.368.peg.1872	2	99	GMNIMLQK		cleaved K-P@C-term	0.00112495	933.479	467.747	933.478	467.746	2	12	1.1.1.1712.6
				fig|1428.368.peg.1872	2	99	GQGIKGDAGHFNGK		missed K-G@5	-0.00145241	1384.68	462.568	1384.68	462.569	3	14	1.1.1.1416.2
				fig|1428.368.peg.1872	2	99	YVSDPYNSHTVRDPYTDWEK		missed R-D@12	-0.00242181	2471.1	618.782	2471.1	618.783	4	15	1.1.1.1767.9
				fig|1428.368.peg.1872	0.394695	85.85	DPYTDWEK			0.000708175	1052.45	527.23	1052.45	527.23	2	10	1.1.1.1726.4
				fig|1428.368.peg.1872	0.264401	77.46	YVSDPYNSHTVR			0.00396815	1436.67	479.898	1436.67	479.897	3	11	1.1.1.1523.3
				fig|1428.368.peg.1872	0.0472076	66.58	FNGIASNGTYQG	Deamidated(N)@7		0.00419741	1228.54	615.277	1228.54	615.275	2	11	1.1.1.1713.17
			Vip4Aa-like_2	fig|1428.368.peg.707	2	99	GMNIMIK			0.000664955	805.42	403.717	805.419	403.717	2	11	1.1.1.1713.3
				fig|1428.368.peg.707	2	99	HLKPNTIYQLSASVK			0.0023179	1697.95	566.99	1697.95	566.989	3	21	1.1.1.1720.3
				fig|1428.368.peg.707	2	99	QHNWANTTLATGEGVTGNAGK			0.010669	2126.02	709.682	2126.01	709.679	3	22	1.1.1.1712.17
				fig|1428.368.peg.707	0.0105502	96.99	AKENQLGDVLK		missed K-E@2	0.975223	1214.64	405.888	1213.67	405.563	3	11	1.1.1.1610.4
			Vip2Ac-like_2	fig|1428.368.peg.1873	2	99	HIGSNANISDDPK			0.00165281	1366.65	456.557	1366.65	456.557	3	12	1.1.1.1445.4
				fig|1428.368.peg.1873	2	99	LFSETFTNTTR			-0.00147522	1315.64	658.827	1315.64	658.828	2	18	1.1.1.1779.4
				fig|1428.368.peg.1873	2	99	NTGLEINNVTIINQK			-0.00409824	1669.9	835.955	1669.9	835.957	2	19	1.1.1.2020.21
				fig|1428.368.peg.1873	2	99	SIEELKSPAKPGEYDINR		missed K-S@6	0.0050292	2045.05	682.69	2045.04	682.688	3	16	1.1.1.1666.12
				fig|1428.368.peg.1873	0.69897	95.87	NVVEYMVEK			-0.00138296	1109.54	555.778	1109.54	555.779	2	12	1.1.1.1761.5
				fig|1428.368.peg.1873	0.120904	65.05	WTNSLSSTHIK			-0.00293443	1272.64	637.329	1272.65	637.33	2	9	1.1.1.1605.16
				fig|1428.368.peg.1873	0.115771	63.91	FTNIYFK			0.000584146	931.481	466.748	931.48	466.747	2	9	1.1.1.1813.2
		2	Vip4Aa-like_1	fig|1428.368.peg.1872	2	99	AFYYYGGSSSYR			-1.86498e-05	1419.61	710.812	1419.61	710.812	2	16	1.1.1.1892.11
				fig|1428.368.peg.1872	2	99	GDSIVTVK			-0.00112937	817.453	409.734	817.455	409.735	2	10	1.1.1.1644.2
				fig|1428.368.peg.1872	2	99	LNLQTTQASGLYGVIK			-0.00390464	1704.94	853.476	1704.94	853.478	2	21	1.1.1.2069.5
				fig|1428.368.peg.1872	2	99	LPQYGPETTLNASQGYQR			-0.00791052	2021.97	1011.99	2021.98	1012	2	14	1.1.1.1904.13
				fig|1428.368.peg.1872	2	99	TFVNLNEYGGFKPNTAYLFSVYTK			0.00334427	2772.38	925.135	2772.38	925.134	3	23	1.1.1.2499.2
				fig|1428.368.peg.1872	1.45593	99	YYNTGTAPIYNVKPTTNFVLK			-0.00661859	2403.24	802.087	2403.25	802.09	3	14	1.1.1.2044.11
				fig|1428.368.peg.1872	0.554396	93.1	NPLVAAYPSVGVHMENLIISNNR			-0.00240515	2507.29	836.772	2507.3	836.772	3	11	1.1.1.2313.19
				fig|1428.368.peg.1872	0.17134	71.6	YVSDPYNSHTVR			0.00323787	1436.67	479.898	1436.67	479.897	3	8	1.1.1.1640.5
			Vip4Aa-like_2	fig|1428.368.peg.707	1.50864	99	LTLETTQASGLYGR			-0.00687726	1508.78	755.396	1508.78	755.399	2	13	1.1.1.1916.8
				fig|1428.368.peg.707	0.0209071	89.21	IAFDTTEQNGK	Deamidated(N)@9		-0.00272388	1223.56	612.789	1223.57	612.791	2	9	1.1.1.1723.7
				fig|1428.368.peg.707	0.00392635	26.75	AKENQLGDVLK		missed K-E@2	-0.000408057	1213.67	405.563	1213.67	405.563	3	7	1.1.1.1730.2
			Vip2Ac-like_2	fig|1428.368.peg.1873	1.72125	99	HIGSNANISDDPK			-0.00441464	1366.64	456.555	1366.65	456.557	3	11	1.1.1.1557.3
				fig|1428.368.peg.1873	0.00788851	40.47	NVVEYMVEK			-0.00217482	1109.54	555.778	1109.54	555.779	2	7	1.1.1.1878.6
				fig|1428.368.peg.1873	0.00436481	27.83	FTNIYFK			3.9504e-05	931.48	466.748	931.48	466.747	2	7	1.1.1.1924.3
		3	Vip4Aa-like_1	fig|1428.368.peg.1872	2	99	AAGHMDTAIK			-0.005113	1013.49	507.753	1013.5	507.755	2	10	1.1.1.1338.9
				fig|1428.368.peg.1872	2	99	AAGHMDTAIKQEAR		missed K-Q@10	-0.00424055	1497.73	500.251	1497.74	500.253	3	20	1.1.1.1369.6
				fig|1428.368.peg.1872	2	99	AFYYYGGSSSYR			0.00174875	1419.61	710.813	1419.61	710.812	2	18	1.1.1.1726.7
				fig|1428.368.peg.1872	2	99	ESVTGIVFDQK			0.00243306	1221.63	611.821	1221.62	611.819	2	19	1.1.1.1834.2
				fig|1428.368.peg.1872	2	99	YVSDPYNSHTVR			0.00162857	1436.67	479.897	1436.67	479.897	3	15	1.1.1.1445.7
				fig|1428.368.peg.1872	0.0145735	98.17	GDSIVTVK			2.00643	819.461	410.738	817.455	409.735	2	11	1.1.1.1449.2
			Vip2Ac-like_2	fig|1428.368.peg.1873	2	99	HIGSNANISDDPK			-0.00342111	1366.64	456.555	1366.65	456.557	3	14	1.1.1.1373.8
				fig|1428.368.peg.1873	2	99	WTNSLSSTHIK			-0.00161524	1272.64	637.33	1272.65	637.33	2	13	1.1.1.1526.10
				fig|1428.368.peg.1873	0.0136762	23.82	EFHQLTPYAK			0.00199586	1232.62	411.881	1232.62	411.88	3	8	1.1.1.1532.5
			Sip1Aa-like_2	fig|1428.368.peg.3296	1.50864	99	AIVTYTLQK			-0.000576183	1035.6	518.805	1035.6	518.805	2	14	1.1.1.1619.5
				fig|1428.368.peg.3296	0.0639892	83.65	YLVEVK			-0.000156857	749.432	375.723	749.432	375.723	2	7	1.1.1.1534.6
	Supernatant 48 h	1	Vip4Aa-like_1	fig|1428.368.peg.1872	2	99	LPQYGPETTLNASQGYQR			0.00250226	2021.98	1012	2021.98	1012	2	23	1.1.1.1591.14
				fig|1428.368.peg.1872	0.243364	91.05	AAGHMDTAIKQEAR		missed K-Q@10	-0.00585753	1497.73	749.872	1497.74	749.875	2	6	1.1.1.1275.16
				fig|1428.368.peg.1872	0.21467	89.64	DPYTDWEK			-0.000935961	1052.44	527.229	1052.45	527.23	2	9	1.1.1.1531.10
				fig|1428.368.peg.1872	0.133713	82.98	KYVSDPYNSHTVR		missed K-Y@1	0.00427428	1564.77	522.596	1564.76	522.595	3	8	1.1.1.1316.10
				fig|1428.368.peg.1872	0.132533	82.88	AAGHMDTAIK			-0.000435475	1013.5	507.755	1013.5	507.755	2	7	1.1.1.1247.6
				fig|1428.368.peg.1872	0.0127808	28.57	YVSDPYNSHTVRDPYTDWEK		missed R-D@12	0.0083241	2471.11	824.711	2471.1	824.708	3	11	1.1.1.1571.14
		2	Vip4Aa-like_1	fig|1428.368.peg.1872	2	99	ESVTGIVFDQK			-0.00176571	1221.62	611.818	1221.62	611.819	2	17	1.1.1.1876.2
				fig|1428.368.peg.1872	2	99	LPQYGPETTLNASQGYQR			-0.00429613	2021.98	1012	2021.98	1012	2	15	1.1.1.1828.16
				fig|1428.368.peg.1872	1.74473	99	AAGHMDTAIKQEAR		missed K-Q@10	0.00469331	1497.74	375.442	1497.74	375.441	4	10	1.1.1.1484.4
				fig|1428.368.peg.1872	1.56864	99	AKENQIGNVLQAGSTYPDK		missed K-E@2	-0.00333544	2032.02	678.347	2032.02	678.348	3	14	1.1.1.1779.13
				fig|1428.368.peg.1872	1.08092	97.95	YVSDPYNSHTVRDPYTDWEK		missed R-D@12	0.00537113	2471.11	824.71	2471.1	824.708	3	13	1.1.1.1809.16
				fig|1428.368.peg.1872	0.0123337	34.43	YVSDPYNSHTVR	Deamidated(N)@7		-0.00423689	1437.65	480.223	1437.65	480.225	3	8	1.1.1.1606.7
			Vip2Ac-like_2	fig|1428.368.peg.1873	2	99	HIGSNANISDDPK			-0.00400029	1366.64	684.329	1366.65	684.331	2	11	1.1.1.1492.13
				fig|1428.368.peg.1873	0.345823	93.38	NVVEYMVEK			-0.0016289	1109.54	555.778	1109.54	555.779	2	12	1.1.1.1799.4
				fig|1428.368.peg.1873	0.340084	93.24	FTNIYFK			-0.00460017	931.476	466.745	931.48	466.747	2	10	1.1.1.1851.2
				fig|1428.368.peg.1873	0.331614	98.26	SINGDAGMSSGPLK	Deamidated(N)@3		0.000737464	1333.62	667.817	1333.62	667.816	2	13	1.1.1.1697.17
				fig|1428.368.peg.1873	0.0741724	68.43	WTNSLSSTHIK			0.00138919	1272.65	425.223	1272.65	425.223	3	11	1.1.1.1651.4
		3	Vip4Aa-like_1	fig|1428.368.peg.1872	2	99	ESVTGIVFDQK			1.73586e-05	1221.62	611.819	1221.62	611.819	2	17	1.1.1.1855.2
				fig|1428.368.peg.1872	2	99	LPQYGPETTLNASQGYQR			-0.00125189	2021.98	1012	2021.98	1012	2	19	1.1.1.1811.18
				fig|1428.368.peg.1872	0.0190881	27.37	AKENQIGNVLQAGSTYPDK		missed K-E@2	-1.01489e-05	2032.02	678.348	2032.02	678.348	3	11	1.1.1.1759.19
			Vip2Ac-like_2	fig|1428.368.peg.1873	2	99	HIGSNANISDDPK			-0.00343107	1366.64	684.329	1366.65	684.331	2	11	1.1.1.1484.11
				fig|1428.368.peg.1873	2	99	NVVEYMVEK			0.00510042	1109.55	555.781	1109.54	555.779	2	12	1.1.1.1779.12
				fig|1428.368.peg.1873	0.742321	97.16	FTNIYFK			-0.00272585	931.478	466.746	931.48	466.747	2	10	1.1.1.1827.6
	Crystal 72 h	1	Cry45Aa-like_1	fig|1428.368.peg.6440	2	99	AGQTREYQIPVTR		missed R-E@5	-0.00566503	1517.79	759.902	1517.8	759.905	2	12	1.1.1.1600.22
				fig|1428.368.peg.6440	2	99	GVTPNPTSQPIVR			-0.00143786	1364.74	683.377	1364.74	683.378	2	18	1.1.1.1635.20
				fig|1428.368.peg.6440	2	99	ILHEMGYTDSTHIYVAHFIGSGK			0.00339614	2575.26	644.821	2575.25	644.82	4	33	1.1.1.2033.3
				fig|1428.368.peg.6440	2	99	LYNLNVQVPDPIVTDNPTNSAVAR			-0.00246236	2609.34	870.788	2609.34	870.789	3	25	1.1.1.2660.2
				fig|1428.368.peg.6440	2	99	MGLQSYVNVVETPLPGR			0.00180536	1858.96	930.489	1858.96	930.488	2	23	1.1.1.2628.2
				fig|1428.368.peg.6440	2	99	PIVTDNPTNSAVAR	Deamidated(N)@9	cleaved D-P@N-term	0.0136512	1454.75	728.382	1454.74	728.376	2	16	1.1.1.1617.23
				fig|1428.368.peg.6440	2	99	RSGLDIPIFDPIVSR		missed R-S@1	-0.000296859	1683.93	562.317	1683.93	562.318	3	22	1.1.1.2815.2
				fig|1428.368.peg.6440	2	99	RSGLDIPIFDPIVSRQ		missed R-S@1; missed R-Q@15	-0.000778911	1811.99	605.004	1811.99	605.004	3	23	1.1.1.2799.2
				fig|1428.368.peg.6440	2	99	SEAGFLFAK			-0.000848657	968.496	485.255	968.497	485.256	2	14	1.1.1.1965.2
				fig|1428.368.peg.6440	2	99	SGLDIPIFDPIVSR			-0.000985646	1527.83	764.922	1527.83	764.922	2	22	1.1.1.3397.2
				fig|1428.368.peg.6440	2	99	SGLDIPIFDPIVSRQ		missed R-Q@14	-0.00293177	1655.89	828.95	1655.89	828.951	2	23	1.1.1.3298.6
				fig|1428.368.peg.6440	2	99	TFIVQTGPFDK		cleaved H-T@N-term	0.000891651	1251.65	626.833	1251.65	626.832	2	17	1.1.1.2033.2
				fig|1428.368.peg.6440	1.88606	99	IVQTGPFDK		cleaved F-I@N-term	0.00112187	1003.53	502.775	1003.53	502.774	2	12	1.1.1.1609.13
				fig|1428.368.peg.6440	1.20066	96.05	TYTTEISR			-0.000502683	969.476	485.745	969.477	485.746	2	8	1.1.1.1518.7
				fig|1428.368.peg.6440	0.777284	89	KLTEDYWR		missed K-L@1	-0.000923165	1109.55	370.857	1109.55	370.857	3	12	1.1.1.1647.3
				fig|1428.368.peg.6440	0.744727	88.1	YVNHSMAR			-0.00227749	976.453	489.234	976.455	489.235	2	11	1.1.1.1336.2
				fig|1428.368.peg.6440	0.628932	84.1	AILDLKK		cleaved M-A@N-term; missed K-K@6	-0.00240738	799.514	400.764	799.517	400.766	2	11	1.1.1.1573.2
				fig|1428.368.peg.6440	0.102373	90.25	VVETPLPGR		cleaved N-V@N-term	-0.00156308	966.548	484.281	966.55	484.282	2	10	1.1.1.1594.12
				fig|1428.368.peg.6440	0.025028	70.12	VPDPIVTDN		cleaved Q-V@N-term; cleaved N-P@C-term	0.000186408	968.482	485.248	968.482	485.248	2	11	1.1.1.1707.7
				fig|1428.368.peg.6440	0.0141246	27.23	EYQIPVTR	Glu->pyro-Glu@N-term		0.00156108	986.52	494.267	986.519	494.267	2	10	1.1.1.1660.2
			Cry45Aa-like_2	fig|1428.368.peg.5334	2	99	DPGNIYNYNMK			-0.00105664	1327.59	443.536	1327.59	443.536	3	16	1.1.1.1727.2
				fig|1428.368.peg.5334	2	99	GTTPNPTSQPIVR			-0.00171664	1366.72	684.367	1366.72	684.367	2	17	1.1.1.1586.19
				fig|1428.368.peg.5334	2	99	MGLQSFVNVVERPLLGR			-0.000432789	1914.05	639.024	1914.05	639.024	3	19	1.1.1.3022.2
				fig|1428.368.peg.5334	2	99	PGNIYNYNMK		cleaved D-P@N-term	-0.00231762	1212.56	607.286	1212.56	607.287	2	16	1.1.1.1663.5
				fig|1428.368.peg.5334	2	99	PIVTDNPTNSAYAK	Deamidated(N)@9	cleaved D-P@N-term	-0.00584845	1490.72	746.367	1490.73	746.37	2	18	1.1.1.1646.16
				fig|1428.368.peg.5334	2	99	QHNTTLKSSGYLGR	Gln->pyro-Glu@N-term	missed K-S@7	-0.000557165	1543.77	772.894	1543.77	772.894	2	20	1.1.1.1573.6
				fig|1428.368.peg.5334	2	99	SEAGLLFAK			-0.00145773	934.511	468.263	934.512	468.263	2	14	1.1.1.1802.2
				fig|1428.368.peg.5334	2	99	VPDPIVTDNPTNSAYAK			-0.0025498	1800.89	901.451	1800.89	901.452	2	28	1.1.1.1773.6
				fig|1428.368.peg.5334	2	99	YNPNPYTAHFTGSGK			2.89645e-05	1652.76	551.927	1652.76	551.927	3	17	1.1.1.1678.3
				fig|1428.368.peg.5334	2	99	YNPNPYTAHFTGSGKLTGK		missed K-L@15	0.00680456	2052.01	514.011	2052.01	514.009	4	15	1.1.1.1687.9
				fig|1428.368.peg.5334	1.95861	99	SGLDIPIFDPVISR			0.0012116	1527.83	764.923	1527.83	764.922	2	23	1.1.1.3298.5
				fig|1428.368.peg.5334	1.5376	98.26	AIIDLLK		cleaved M-A@N-term	-0.000554615	784.505	393.26	784.506	393.26	2	11	1.1.1.2294.2
				fig|1428.368.peg.5334	0.966576	93.34	EYQIPVTGR			-0.00184819	1061.55	531.782	1061.55	531.783	2	11	1.1.1.1666.9
				fig|1428.368.peg.5334	0.896196	95.2	QHNTTLK	Gln->pyro-Glu@N-term		-0.00042431	823.418	412.716	823.419	412.717	2	10	1.1.1.1320.2
				fig|1428.368.peg.5334	0.60206	83.55	SSGYLGR			-0.00027047	738.366	370.19	738.366	370.19	2	7	1.1.1.1459.3
				fig|1428.368.peg.5334	0.0329203	74.69	DPIVTDNPTNSAYAK		cleaved P-D@N-term	-0.0050624	1604.76	803.389	1604.77	803.391	2	10	1.1.1.1666.23
				fig|1428.368.peg.5334	0.00392635	25.5	PYTAHFTGSGK		cleaved N-P@N-term	4.50442e-05	1164.56	389.193	1164.56	389.193	3	7	1.1.1.1486.5
				fig|1428.368.peg.5334	0.00261362	21.44	GNIYNYNMK		cleaved P-G@N-term	-0.000593833	1115.51	558.76	1115.51	558.761	2	8	1.1.1.1645.8
			Cry45Aa-like_3	fig|1428.368.peg.6442	2	99	AGQTRKYQIPLTGR		missed R-K@5; missed K-Y@6	-0.000553342	1587.88	397.978	1587.88	397.978	4	14	1.1.1.1594.5
				fig|1428.368.peg.6442	2	99	GLDIPIFDPVVSR			0.000278507	1426.78	714.398	1426.78	714.398	2	21	1.1.1.3175.2
				fig|1428.368.peg.6442	2	99	GLDIPIFDPVVSRQ		missed R-Q@13	-0.00213191	1554.84	778.427	1554.84	778.428	2	22	1.1.1.3105.2
				fig|1428.368.peg.6442	2	99	GYTPNPTSQPIVR			0.000127395	1428.74	715.375	1428.74	715.375	2	20	1.1.1.1671.3
				fig|1428.368.peg.6442	2	99	MGLQSYVDVVETPLSGR			-0.00618396	1849.92	925.966	1849.92	925.969	2	21	1.1.1.2867.2
				fig|1428.368.peg.6442	2	99	MTGYNGGVISEILDMQGVANITYPQFGIAHFTGSGK	Deamidated(N)@5		0.0287541	3773.84	944.466	3773.81	944.459	4	24	1.1.1.4270.2
				fig|1428.368.peg.6442	2	99	NVVLECDITGTTTCVYR	Carbamidomethyl(C)@6; Carbamidomethyl(C)@14		-0.0049186	1999.93	1000.97	1999.93	1000.97	2	23	1.1.1.2041.3
				fig|1428.368.peg.6442	2	99	PVVIDNPTNSALAR		cleaved D-P@N-term	-0.0012244	1465.79	733.901	1465.79	733.902	2	25	1.1.1.1739.6
				fig|1428.368.peg.6442	2	99	RGLDIPIFDPVVSR		missed R-G@1	0.00495963	1582.89	528.637	1582.88	528.635	3	18	1.1.1.2680.2
				fig|1428.368.peg.6442	2	99	SEAGFVFAK			-0.00168807	954.479	478.247	954.481	478.248	2	14	1.1.1.1756.4
				fig|1428.368.peg.6442	1.34679	99	YPGNSVDR	Deamidated(N)@4		-0.00283563	907.401	454.708	907.404	454.709	2	9	1.1.1.1446.5
				fig|1428.368.peg.6442	0.752027	90.06	KYQIPLTGRR		missed K-Y@1; missed R-R@9	-0.000192763	1230.72	616.367	1230.72	616.367	2	12	1.1.1.1556.6
				fig|1428.368.peg.6442	0.640165	86.76	YQIPLTGRR		missed R-R@8	-0.00292983	1102.62	368.548	1102.62	368.549	3	9	1.1.1.1635.3
				fig|1428.368.peg.6442	0.293282	99	KYQIPLTGR	Formyl(K)@1	missed K-Y@1	-0.00213988	1102.61	552.313	1102.61	552.314	2	15	1.1.1.1770.2
				fig|1428.368.peg.6442	0.0319843	81.5	PTNSALAR		cleaved N-P@N-term	-0.00363426	828.442	415.228	828.445	415.23	2	10	1.1.1.1373.2
				fig|1428.368.peg.6442	0.0141246	68.8	YTTSNTYTTETSR		cleaved N-Y@N-term	-0.00624412	1523.67	762.841	1523.67	762.844	2	10	1.1.1.1514.11
			Cry32Ea-like	fig|1428.368.peg.1765	2	99	AQAITELQGIQAAIR			0.00134468	1581.89	791.95	1581.88	791.949	2	26	1.1.1.2431.2
				fig|1428.368.peg.1765	2	99	AVQAAQSAIQALFTDQNQTR			0.00351893	2160.1	721.039	2160.09	721.038	3	27	1.1.1.2765.2
				fig|1428.368.peg.1765	2	99	DAACNWEK	Carbamidomethyl(C)@4		-0.000727484	992.401	497.208	992.402	497.208	2	11	1.1.1.1514.5
				fig|1428.368.peg.1765	2	99	DAACNWEKNPNNPQLK	Carbamidomethyl(C)@4	missed K-N@8	0.0125523	1897.89	633.636	1897.87	633.632	3	20	1.1.1.1617.18
				fig|1428.368.peg.1765	2	99	DAACNWEKNPNNPQLKETVR	Carbamidomethyl(C)@4	missed K-N@8; missed K-E@16	0.004033	2383.14	596.792	2383.13	596.791	4	19	1.1.1.1635.13
				fig|1428.368.peg.1765	2	99	DLIIDGGYQGER			-0.00229733	1334.64	668.33	1334.65	668.331	2	18	1.1.1.1788.4
				fig|1428.368.peg.1765	2	99	EGAGEGYVTISDGTEDNTETVK			0.00153911	2271	758.009	2271	758.008	3	20	1.1.1.1700.14
				fig|1428.368.peg.1765	2	99	ERNMTNQPSEVSGTNAYPGNNNR	Deamidated(N)@3; Deamidated(N)@20	missed R-N@2	0.00259429	2551.1	851.375	2551.1	851.374	3	24	1.1.1.1588.10
				fig|1428.368.peg.1765	2	99	ETLPVTLPVGSEDR			-0.00347166	1511.78	756.897	1511.78	756.899	2	20	1.1.1.2059.2
				fig|1428.368.peg.1765	2	99	FTAGVETPR			-0.00160939	976.496	489.255	976.498	489.256	2	15	1.1.1.1573.5
				fig|1428.368.peg.1765	2	99	GFVGNSKELEVFVQR	Deamidated(N)@5	missed K-E@7	0.00107827	1708.88	570.634	1708.88	570.633	3	24	1.1.1.2430.2
				fig|1428.368.peg.1765	2	99	GMEPDLLSAIPVFWDIN		cleaved N-S@C-term	0.0125	1915.95	958.983	1915.94	958.977	2	18	1.1.1.5233.2
				fig|1428.368.peg.1765	2	99	GMEPDLLSAIPVFWDINSSYN		cleaved N-S@C-term	0.0113403	2367.12	790.048	2367.11	790.044	3	17	1.1.1.5194.2
				fig|1428.368.peg.1765	2	99	GMEPDLLSAIPVFWDINSSYNSSSGLPCR	Carbamidomethyl(C)@28		0.0136629	3211.51	1071.51	3211.5	1071.51	3	23	1.1.1.4570.2
				fig|1428.368.peg.1765	2	99	GPGSTGGDLVK			-0.00155421	986.502	494.258	986.503	494.259	2	17	1.1.1.1489.3
				fig|1428.368.peg.1765	2	99	GPGSTGGDLVKLPVPEGR		missed K-L@11	-0.00113828	1734.93	579.316	1734.93	579.316	3	26	1.1.1.1807.2
				fig|1428.368.peg.1765	2	99	GSETSLLTAYVEAATLHLGLLK			0.00924573	2286.26	763.093	2286.25	763.09	3	25	1.1.1.4012.2
				fig|1428.368.peg.1765	2	99	GYITYGNASVVK			-0.000696858	1270.66	636.335	1270.66	636.335	2	20	1.1.1.1724.3
				fig|1428.368.peg.1765	2	99	IDESKLKPYTR		missed K-L@5	0.00217085	1348.74	675.376	1348.74	675.375	2	15	1.1.1.1522.15
				fig|1428.368.peg.1765	2	99	IGNASVLVLSNWSANLSQNVCVNPAHGYILR	Carbamidomethyl(C)@21		-0.00257452	3365.73	1122.92	3365.73	1122.92	3	18	1.1.1.3352.2
				fig|1428.368.peg.1765	2	99	IGTTDGVANIDNLEVIEANPLTGEALAR			0.00172073	2865.47	956.165	2865.47	956.165	3	23	1.1.1.3299.2
				fig|1428.368.peg.1765	2	99	IHIYNEGGGDLILDK			0.000186718	1655.85	552.958	1655.85	552.958	3	23	1.1.1.1908.2
				fig|1428.368.peg.1765	2	99	IHIYNEGGGDLILDKIEFIPIEGTLEEYQANQDLEK		missed K-I@15	0.013052	4116.07	1030.03	4116.06	1030.02	4	29	1.1.1.3627.3
				fig|1428.368.peg.1765	2	99	IPYVYHPFLQGSLPAVPGETYDIFQQLSNAIGK			0.0169946	3661.9	916.482	3661.88	916.478	4	21	1.1.1.4311.2
				fig|1428.368.peg.1765	2	99	ITQIPAVK		cleaved M-I@N-term	0.00124848	868.539	435.277	868.538	435.276	2	13	1.1.1.1604.2
				fig|1428.368.peg.1765	2	99	KAVNALFKSDAK		missed K-A@1; missed K-S@8	0.00195528	1290.73	431.251	1290.73	431.25	3	10	1.1.1.1526.4
				fig|1428.368.peg.1765	2	99	KEGAGEGYVTISDGTEDN		cleaved N-T@C-term; missed K-E@1	0.00178589	1840.8	921.406	1840.8	921.405	2	20	1.1.1.1666.26
				fig|1428.368.peg.1765	2	99	KEGAGEGYVTISDGTEDNTETVK		missed K-E@1	-0.0024601	2399.1	1200.56	2399.1	1200.56	2	25	1.1.1.1664.4
				fig|1428.368.peg.1765	2	99	KETLPVTLPVGSEDR		missed K-E@1	-1.39493e-05	1639.88	547.633	1639.88	547.633	3	21	1.1.1.1803.2
				fig|1428.368.peg.1765	2	99	LPVPEGR			0.000449369	766.434	384.224	766.434	384.224	2	9	1.1.1.1529.3
				fig|1428.368.peg.1765	2	99	LRPDITLNHILHAETLVQK			0.00550538	2210.26	553.572	2210.25	553.571	4	29	1.1.1.2292.2
				fig|1428.368.peg.1765	2	99	LSYVGLGMLNSDYR			0.000231804	1586.78	794.395	1586.78	794.395	2	25	1.1.1.2587.2
				fig|1428.368.peg.1765	2	99	LSYVGLGMLNSDYRDFVSSPTR		missed R-D@14	0.000475998	2476.21	826.409	2476.21	826.409	3	21	1.1.1.2920.2
				fig|1428.368.peg.1765	2	99	LVECMSDEIYPQEK	Carbamidomethyl(C)@4		-0.00411787	1739.77	870.893	1739.77	870.895	2	19	1.1.1.1798.2
				fig|1428.368.peg.1765	2	99	LYEVPTKSQLTR		missed K-S@7	0.0020771	1433.79	478.937	1433.79	478.937	3	17	1.1.1.1631.4
				fig|1428.368.peg.1765	2	99	LYRDAACNWEKNPNNPQLK	Carbamidomethyl(C)@7	missed R-D@3; missed K-N@11	0.00382399	2330.13	583.539	2330.12	583.538	4	15	1.1.1.1650.9
				fig|1428.368.peg.1765	2	99	MDQYYNNNEYEILDHGR			-0.00413864	2172.91	725.312	2172.92	725.313	3	21	1.1.1.1868.3
				fig|1428.368.peg.1765	2	99	MDQYYNNNEYEILDHGRR		missed R-R@17	0.00496756	2329.02	583.263	2329.02	583.262	4	21	1.1.1.1751.5
				fig|1428.368.peg.1765	2	99	MDSYVSTSLMTAQNGSPLSGYVTK	Deamidated(N)@14		0.00504975	2537.17	846.731	2537.17	846.729	3	22	1.1.1.2615.2
				fig|1428.368.peg.1765	2	99	MMTAAEQITNK			-0.00823082	1236.58	619.295	1236.58	619.299	2	17	1.1.1.1587.11
				fig|1428.368.peg.1765	2	99	MMTAAEQITNKAIAEQAR	Deamidated(N)@10	missed K-A@11	0.00232659	1976.97	659.997	1976.97	659.996	3	20	1.1.1.1699.6
				fig|1428.368.peg.1765	2	99	NMNVPYGIPPTNPCDRDYQR	Carbamidomethyl(C)@14	missed R-D@16	-0.00378374	2406.08	803.034	2406.08	803.035	3	16	1.1.1.1797.3
				fig|1428.368.peg.1765	2	99	NMTNQPSEVSGTNAYPGNNNR			0.00295769	2263.99	755.671	2263.99	755.67	3	19	1.1.1.1594.26
				fig|1428.368.peg.1765	2	99	NPNNPQLKETVR		missed K-E@8	-0.00205102	1408.74	705.377	1408.74	705.378	2	12	1.1.1.1469.16
				fig|1428.368.peg.1765	2	99	NTLQLNVTDYLVDQAAK			0.00300701	1904.99	953.501	1904.98	953.499	2	23	1.1.1.2812.4
				fig|1428.368.peg.1765	2	99	NVLRNGDFSAGLSNWQGAEGALVQK	Deamidated(N)@5	missed R-N@4	0.00858216	2631.31	878.111	2631.3	878.109	3	29	1.1.1.2544.2
				fig|1428.368.peg.1765	2	99	PGTPQAQISWDK		cleaved D-P@N-term	0.000910089	1326.66	664.336	1326.66	664.336	2	20	1.1.1.1710.6
				fig|1428.368.peg.1765	2	99	SDYRDFVSSPTR		cleaved N-S@N-term; missed R-D@4	0.00137655	1428.66	477.229	1428.66	477.228	3	16	1.1.1.1665.3
				fig|1428.368.peg.1765	2	99	SPIQEGYK			-0.000886345	920.459	461.237	920.46	461.237	2	13	1.1.1.1482.4
				fig|1428.368.peg.1765	2	99	SPIQEGYKERNMTNQPSEVSGTNAYPGNNNR	Deamidated(N)@28	missed K-E@8; missed R-N@10	0.00837958	3452.57	864.151	3452.57	864.149	4	18	1.1.1.1634.15
				fig|1428.368.peg.1765	2	99	SSYNSSSGLPCR	Deamidated(N)@4; Carbamidomethyl(C)@11	cleaved N-S@N-term	0.00145873	1314.55	658.284	1314.55	658.283	2	17	1.1.1.1553.4
				fig|1428.368.peg.1765	2	99	TAALGIPFTHPFNDTSLIK			0.00235061	2042.09	681.703	2042.08	681.702	3	20	1.1.1.2659.2
				fig|1428.368.peg.1765	2	99	TGLQQQYNTGDWNK		cleaved N-T@N-term	-0.00208639	1651.76	826.886	1651.76	826.887	2	21	1.1.1.1702.9
				fig|1428.368.peg.1765	2	99	TLQLNVTDYLVDQAAK		cleaved N-T@N-term	0.000323001	1790.94	896.478	1790.94	896.478	2	22	1.1.1.2811.6
				fig|1428.368.peg.1765	2	99	TQFVATNTILYNR			-0.00475586	1539.8	770.907	1539.8	770.91	2	20	1.1.1.1966.2
				fig|1428.368.peg.1765	2	99	TSSNVSVR			-0.00118151	848.434	425.224	848.435	425.225	2	11	1.1.1.1310.3
				fig|1428.368.peg.1765	2	99	TVYTPLEGNVGGNWLSPEPVPSIDVIEGNIVDTPGLFK			0.0233871	4023.07	1006.78	4023.05	1006.77	4	21	1.1.1.4326.2
				fig|1428.368.peg.1765	2	99	TYPVLTNQTIPQDMACDSCDAGTVMR	Carbamidomethyl(C)@16; Carbamidomethyl(C)@19		0.00179364	2943.29	982.104	2943.29	982.103	3	23	1.1.1.2394.2
				fig|1428.368.peg.1765	2	99	VTARKEGAGEGYVTISDGTEDNTETVK		missed R-K@4; missed K-E@5	0.0163815	2826.37	707.599	2826.35	707.595	4	16	1.1.1.1622.19
				fig|1428.368.peg.1765	2	99	VTDYLVDQAAK		cleaved N-V@N-term	-0.000975876	1221.62	611.819	1221.62	611.819	2	18	1.1.1.1682.3
				fig|1428.368.peg.1765	2	99	WLHNISFEAIDGGVNTSVIK			0.00153243	2199.13	734.052	2199.13	734.051	3	25	1.1.1.2613.2
				fig|1428.368.peg.1765	2	99	WQGAEGALVQK		cleaved N-W@N-term	-0.00297135	1185.61	593.813	1185.61	593.814	2	15	1.1.1.1662.2
				fig|1428.368.peg.1765	2	99	WYNTGLQQQYNTGDWNK			-0.00517601	2114.94	1058.48	2114.94	1058.48	2	23	1.1.1.2039.2
				fig|1428.368.peg.1765	2	99	YASNADVNVFCTLQK	Carbamidomethyl(C)@11		-0.00236938	1728.81	865.413	1728.81	865.414	2	24	1.1.1.2095.2
				fig|1428.368.peg.1765	2	99	YDKEIHK		missed K-E@3	-0.00279718	931.473	466.744	931.476	466.745	2	11	1.1.1.1163.2
				fig|1428.368.peg.1765	2	99	YDKEIHKNMNVPYGIPPTNPCDRDYQR	Carbamidomethyl(C)@21	missed K-E@3; missed K-N@7; missed R-D@23	0.0203908	3319.57	554.269	3319.55	554.266	6	17	1.1.1.1692.4
				fig|1428.368.peg.1765	2	99	YGDFDSDNWSGENGWK	Deamidated(N)@13		-0.000374278	1876.72	939.366	1876.72	939.366	2	26	1.1.1.2236.2
				fig|1428.368.peg.1765	2	99	YLHMPGANIPQFSDTVFPTYAYQK			0.00726	2787.34	930.122	2787.34	930.12	3	21	1.1.1.2862.2
				fig|1428.368.peg.1765	2	99	YPLAQAPGSVLQNMDYK			0.000617758	1893.93	947.972	1893.93	947.972	2	23	1.1.1.2354.2
				fig|1428.368.peg.1765	2	99	YPLAQAPGSVLQNMDYKELMNK		missed K-E@17	0.00279161	2509.24	837.42	2509.23	837.419	3	26	1.1.1.2601.2
				fig|1428.368.peg.1765	1.95861	98.92	LESIELIR			-0.000134384	971.565	486.79	971.565	486.79	2	13	1.1.1.1916.2
				fig|1428.368.peg.1765	1.92082	98.75	LTQSDMR			0.000754841	849.402	425.708	849.401	425.708	2	9	1.1.1.1386.2
				fig|1428.368.peg.1765	1.88606	98.66	AKQTLVK		missed K-Q@2	-0.00150397	786.495	394.255	786.496	394.255	2	10	1.1.1.1228.2
				fig|1428.368.peg.1765	1.85387	98.56	AIAEQAR			-0.00140479	757.407	379.711	757.408	379.711	2	10	1.1.1.1311.4
				fig|1428.368.peg.1765	1.82391	98.46	LYEVPTK			-0.00319592	848.461	425.238	848.464	425.239	2	8	1.1.1.1583.4
				fig|1428.368.peg.1765	1.79588	98.44	MCLLDLVK	Carbamidomethyl(C)@2		-0.00415032	990.52	496.267	990.524	496.269	2	13	1.1.1.2696.2
				fig|1428.368.peg.1765	1.55284	97.19	KAVNALFK		missed K-A@1	0.000509004	889.539	445.777	889.539	445.777	2	12	1.1.1.1561.2
				fig|1428.368.peg.1765	1.46852	99	AVNALFK	Deamidated(N)@3		-0.00320072	762.424	382.219	762.428	382.221	2	11	1.1.1.1723.2
				fig|1428.368.peg.1765	1.40894	96.09	AVNALFKSDAK		missed K-S@7	0.000264566	1162.63	582.325	1162.63	582.325	2	12	1.1.1.1605.5
				fig|1428.368.peg.1765	1.22915	94.09	DLIIDGGYQGERGTKK		missed R-G@12; missed K-K@15	-0.000971429	1748.9	438.233	1748.91	438.234	4	11	1.1.1.1619.5
				fig|1428.368.peg.1765	1.03152	90.74	LTQSDMRSPIQEGYKER		missed R-S@7; missed K-E@15	0.00114489	2037	510.256	2036.99	510.256	4	10	1.1.1.1594.15
				fig|1428.368.peg.1765	0.943095	98.4	SKELEVFVQR		cleaved N-S@N-term; missed K-E@2	-0.00394603	1233.67	412.23	1233.67	412.231	3	13	1.1.1.1688.2
				fig|1428.368.peg.1765	0.863279	86.3	ADDPIFK			-0.00105935	804.401	403.208	804.402	403.208	2	11	1.1.1.1632.2
				fig|1428.368.peg.1765	0.847712	85.81	NPNNPQLK			-0.00229053	923.48	462.747	923.482	462.749	2	10	1.1.1.1378.2
				fig|1428.368.peg.1765	0.716699	80.77	DLIIDGGYQGERGTK		missed R-G@12	-0.00623243	1620.8	541.275	1620.81	541.278	3	12	1.1.1.1698.5
				fig|1428.368.peg.1765	0.701147	80.12	MPYFSAR			0.000816116	870.407	436.211	870.406	436.21	2	11	1.1.1.1719.2
				fig|1428.368.peg.1765	0.681937	98.91	NEYEILDHGR		cleaved N-N@N-term	0.000795259	1244.58	623.297	1244.58	623.297	2	12	1.1.1.1639.8
				fig|1428.368.peg.1765	0.336299	95.98	NNEYEILDHGR		cleaved N-N@N-term	0.00725528	1358.63	680.322	1358.62	680.318	2	10	1.1.1.1649.17
				fig|1428.368.peg.1765	0.28735	48.43	SLYGQRNVLR		missed R-N@6	-0.0033478	1204.66	603.339	1204.67	603.341	2	8	1.1.1.1580.18
				fig|1428.368.peg.1765	0.208309	38.06	LYRDAACNWEK	Carbamidomethyl(C)@7	missed R-D@3	0.00315633	1424.65	475.892	1424.65	475.891	3	9	1.1.1.1595.12
				fig|1428.368.peg.1765	0.185752	69.41	GFVGNSK	Deamidated(N)@5		-0.00188603	708.342	355.178	708.344	355.179	2	9	1.1.1.1420.2
				fig|1428.368.peg.1765	0.0958256	99	ADDPIFKGR	Formyl(K)@7	missed K-G@7	-0.000688138	1045.52	523.766	1045.52	523.767	2	11	1.1.1.1687.10
				fig|1428.368.peg.1765	0.0788339	75.44	GPSNNYEASAYR		cleaved N-G@N-term	0.00286222	1327.58	664.798	1327.58	664.797	2	9	1.1.1.1537.11
				fig|1428.368.peg.1765	0.0141246	22.94	MITQIPAVK		cleaved N-M@N-term	-0.000291629	999.578	500.796	999.579	500.797	2	10	1.1.1.1725.4
				fig|1428.368.peg.1765	0.00174066	97.95	THPFNDTSLIK		cleaved F-T@N-term	1.00505	1272.66	425.226	1271.65	424.891	3	15	1.1.1.1665.2
				fig|1428.368.peg.1765	0.00174066	16.83	TLEEYQANQDLEK		cleaved G-T@N-term	-0.0139588	1579.72	790.869	1579.74	790.876	2	8	1.1.1.1647.26
				fig|1428.368.peg.1765	0.00130484	18.92	NPLTGEALAR		cleaved A-N@N-term	-0.00256302	1040.56	521.287	1040.56	521.288	2	8	1.1.1.1654.6
			Cry32Da-like	fig|1428.368.peg.1846	2	99	ASGGTDYQVIK			-0.00193403	1137.56	569.79	1137.57	569.791	2	19	1.1.1.1568.3
				fig|1428.368.peg.1846	2	99	ATFDNLEVIEANPLTGEALAR			-0.00434366	2243.14	1122.58	2243.14	1122.58	2	22	1.1.1.3115.2
				fig|1428.368.peg.1846	2	99	AVNALFTSDAK			-0.00165641	1135.59	568.8	1135.59	568.801	2	19	1.1.1.1718.2
				fig|1428.368.peg.1846	2	99	DNATTFVDPK			0.00171164	1106.53	554.27	1106.52	554.269	2	14	1.1.1.1620.8
				fig|1428.368.peg.1846	2	99	EGSGEGYVTISDGTEDNTETLK			0.00405654	2301.02	768.013	2301.01	768.012	3	28	1.1.1.1774.3
				fig|1428.368.peg.1846	2	99	FEPVRDNATTFVDPK		missed R-D@5	0.00517157	1734.86	579.295	1734.86	579.293	3	19	1.1.1.1730.5
				fig|1428.368.peg.1846	2	99	FTVGEVATR			-0.000674138	978.513	490.264	978.513	490.264	2	14	1.1.1.1663.4
				fig|1428.368.peg.1846	2	99	GPGSTGGDLVSLPTYAK			-0.00498735	1618.82	810.415	1618.82	810.417	2	31	1.1.1.1964.2
				fig|1428.368.peg.1846	2	99	GQALIGLK			-0.0039715	798.492	400.253	798.496	400.255	2	13	1.1.1.1670.2
				fig|1428.368.peg.1846	2	99	GTTYRSDPAQNTMSAIEAR		missed R-S@5	0.00118457	2067.97	690.329	2067.96	690.329	3	14	1.1.1.1732.6
				fig|1428.368.peg.1846	2	99	GYETILLPLYAQAANIHLIVLR			0.00676475	2480.42	827.815	2480.42	827.812	3	19	1.1.1.4113.2
				fig|1428.368.peg.1846	2	99	IEIPLTSSAGQLYTIR			-5.44499e-05	1760.97	881.491	1760.97	881.491	2	26	1.1.1.2631.3
				fig|1428.368.peg.1846	2	99	INDYQIDYK			-0.00279416	1170.55	586.284	1170.56	586.285	2	14	1.1.1.1672.3
				fig|1428.368.peg.1846	2	99	IPYVYNAFLQGALPPVPGETSDIFQQLSSAVAIAR			0.0265381	3731.98	934.003	3731.96	933.996	4	21	1.1.1.4906.2
				fig|1428.368.peg.1846	2	99	IWETNPTPGNTSQLLDAFR			0.00218073	2159.07	1080.54	2159.06	1080.54	2	23	1.1.1.2980.2
				fig|1428.368.peg.1846	2	99	KEGSGEGYVTISDGTEDNTETLK		missed K-E@1	0.00350867	2429.11	810.711	2429.11	810.71	3	20	1.1.1.1695.12
				fig|1428.368.peg.1846	2	99	LKPDITLNHILQAETEVQK			0.00322849	2189.21	730.744	2189.21	730.742	3	23	1.1.1.2266.5
				fig|1428.368.peg.1846	2	99	LVECMSDKIYPQEK	Carbamidomethyl(C)@4	missed K-I@8	-0.00215719	1738.82	870.42	1738.83	870.421	2	23	1.1.1.1691.11
				fig|1428.368.peg.1846	2	99	NLALDHIDR			-0.00204822	1065.55	533.785	1065.56	533.786	2	15	1.1.1.1631.5
				fig|1428.368.peg.1846	2	99	NLALDHIDRINDYQIDYK		missed R-I@9	0.00476562	2218.11	740.376	2218.1	740.375	3	22	1.1.1.2093.3
				fig|1428.368.peg.1846	2	99	NLLNHGDFEFPDWSGENGWK	Deamidated(N)@17		-0.0018316	2362.03	788.35	2362.03	788.35	3	24	1.1.1.3003.2
				fig|1428.368.peg.1846	2	99	QIGATIFGWTHTSVDPNNTIDTTK			0.00431253	2616.29	873.103	2616.28	873.101	3	19	1.1.1.2542.3
				fig|1428.368.peg.1846	2	99	SCQDAMPHLDTR	Carbamidomethyl(C)@2		0.000161102	1429.61	477.543	1429.61	477.543	3	17	1.1.1.1599.6
				fig|1428.368.peg.1846	2	99	SDPAQNTMSAIEAR			-0.000277414	1489.68	745.849	1489.68	745.849	2	22	1.1.1.1732.7
				fig|1428.368.peg.1846	2	99	TDSYPMTAHSSSLSGYVTK			0.00417511	2030.93	677.984	2030.93	677.982	3	18	1.1.1.1738.4
				fig|1428.368.peg.1846	2	99	TFEIFPETNR			0.00100403	1252.61	627.312	1252.61	627.312	2	17	1.1.1.2162.2
				fig|1428.368.peg.1846	2	99	THTNNKTDSYPMTAHSSSLSGYVTK	Deamidated(N)@4	missed K-T@6	0.00911752	2727.25	682.821	2727.24	682.818	4	16	1.1.1.1654.20
				fig|1428.368.peg.1846	2	99	TKQWFEPR		missed K-Q@2	-0.000553336	1090.56	546.285	1090.56	546.285	2	13	1.1.1.1630.4
				fig|1428.368.peg.1846	2	99	TLDTNMITALQGLTDEYEYYHIPLDVSTGQK			0.0144267	3528.71	1177.24	3528.7	1177.24	3	19	1.1.1.4049.2
				fig|1428.368.peg.1846	2	99	TSNHVSVMSGNPIFK			-0.000422575	1616.8	539.94	1616.8	539.94	3	22	1.1.1.1775.2
				fig|1428.368.peg.1846	2	99	VESIELIR			-0.00176709	957.548	479.781	957.549	479.782	2	13	1.1.1.1789.2
				fig|1428.368.peg.1846	2	99	VWESMIGYAQALIK			-0.00141787	1607.84	804.926	1607.84	804.926	2	23	1.1.1.3530.2
				fig|1428.368.peg.1846	2	99	VYTAAVKTEFTR		missed K-T@7	0.00255575	1384.74	462.587	1384.74	462.586	3	12	1.1.1.1619.8
				fig|1428.368.peg.1846	2	99	YLHMPGADNPQLSDQVYPTYAYQK			0.00112032	2798.3	933.775	2798.3	933.774	3	20	1.1.1.2145.2
				fig|1428.368.peg.1846	2	99	YSNGEYKDVEAWNLR	Deamidated(N)@3	missed K-D@7	-0.000187109	1843.84	615.62	1843.84	615.62	3	25	1.1.1.1960.2
				fig|1428.368.peg.1846	2	99	YTWVGNSWTK			-0.00290636	1240.58	621.3	1240.59	621.301	2	15	1.1.1.1967.2
				fig|1428.368.peg.1846	1.88606	98.9	DLEVFITR			0.000792169	991.535	496.775	991.534	496.774	2	13	1.1.1.2250.2
				fig|1428.368.peg.1846	1.72125	99	PAQNTMSAIEAR		cleaved D-P@N-term	-0.026604	1287.6	644.806	1287.62	644.819	2	14	1.1.1.1617.20
				fig|1428.368.peg.1846	1.60206	99	FEPVRDNATTFVD		cleaved D-P@C-term; missed R-D@5	-0.00169826	1509.71	755.861	1509.71	755.862	2	15	1.1.1.1803.7
				fig|1428.368.peg.1846	0.570248	93.81	MCLLDQVK	Oxidation(M)@1; Carbamidomethyl(C)@2		-0.000991796	1021.49	511.754	1021.49	511.754	2	12	1.1.1.1681.4
				fig|1428.368.peg.1846	0.457175	69.03	INDYQIDYKNK		missed K-N@9	-0.00578483	1412.69	471.903	1412.69	471.905	3	10	1.1.1.1590.5
				fig|1428.368.peg.1846	0.406714	88.75	KAVNALFTSDAK	Deamidated(N)@4	missed K-A@1	0.00356179	1264.67	422.564	1264.67	422.563	3	10	1.1.1.1609.6
				fig|1428.368.peg.1846	0.390406	63.49	VQQTFVK			0.00119556	848.477	425.246	848.476	425.245	2	7	1.1.1.1504.6
				fig|1428.368.peg.1846	0.267606	50.47	IFPETNR		cleaved E-I@N-term	-0.00233131	875.448	438.731	875.45	438.732	2	6	1.1.1.1577.5
				fig|1428.368.peg.1846	0.216811	92.01	ALDHIDR		cleaved L-A@N-term	-0.00185266	838.428	420.221	838.43	420.222	2	10	1.1.1.1632.3
				fig|1428.368.peg.1846	0.154282	33.72	GQALIGLKTESTR		missed K-T@8	-0.00123692	1372.77	687.39	1372.77	687.391	2	8	1.1.1.1618.21
				fig|1428.368.peg.1846	0.136677	30.63	YRDMQWR		missed R-D@2	0.00462309	1053.49	352.169	1053.48	352.168	3	10	1.1.1.1562.2
				fig|1428.368.peg.1846	0.114639	26.57	EIYTSIR			0.000503012	880.466	441.24	880.465	441.24	2	8	1.1.1.1609.7
				fig|1428.368.peg.1846	0.100727	23.76	EFIFYR			9.50654e-05	873.439	437.727	873.438	437.727	2	9	1.1.1.2040.2
				fig|1428.368.peg.1846	0.0746879	18.35	YTGEEQAGGLIR			-0.000386108	1292.64	647.325	1292.64	647.325	2	7	1.1.1.1654.19
				fig|1428.368.peg.1846	0.000869459	22.74	SQNGFNPSFAGNAR	Deamidated(N)@3	cleaved Q-S@N-term	0.0084381	1466.66	734.338	1466.65	734.334	2	11	1.1.1.1707.12
			Cry32Eb-like	fig|1428.368.peg.6268	2	99	ALPVVPGETYDIFLQLSDAINIAR			0.0145176	2614.42	872.479	2614.4	872.474	3	20	1.1.1.4919.2
				fig|1428.368.peg.6268	2	99	ALYDQRNALVNGDFSAR	Deamidated(N)@11	missed R-N@6	0.000781198	1909.93	637.65	1909.93	637.65	3	25	1.1.1.1800.4
				fig|1428.368.peg.6268	2	99	ATSPVSSNVFPTLR			-0.00322703	1474.77	738.395	1474.78	738.396	2	23	1.1.1.2041.2
				fig|1428.368.peg.6268	2	99	DAIQMLFTDSNQNR			-0.000940667	1651.76	826.888	1651.76	826.888	2	22	1.1.1.2627.2
				fig|1428.368.peg.6268	2	99	EAVNTLFLNDALQLK			0.000448678	1687.91	844.965	1687.91	844.965	2	24	1.1.1.3043.2
				fig|1428.368.peg.6268	2	99	EGSGEGYVTISDGTEENTETLK			0.00572923	2315.03	772.686	2315.03	772.684	3	28	1.1.1.1772.2
				fig|1428.368.peg.6268	2	99	FIADEKATSPVSSN		cleaved N-V@C-term; missed K-A@6	0.00723824	1464.72	733.366	1464.71	733.362	2	17	1.1.1.1615.14
				fig|1428.368.peg.6268	2	99	FIADEKATSPVSSNVFPTLR		missed K-A@6	0.0038943	2178.14	727.053	2178.13	727.051	3	26	1.1.1.2161.2
				fig|1428.368.peg.6268	2	99	GAVQIAR			-0.000649207	713.418	357.716	713.418	357.716	2	11	1.1.1.1448.2
				fig|1428.368.peg.6268	2	99	IKGAVQIAR		missed K-G@2	-0.00166214	954.596	478.305	954.597	478.306	2	14	1.1.1.1473.5
				fig|1428.368.peg.6268	2	99	IPYVYNQFLQR			0.00101377	1439.76	720.886	1439.76	720.885	2	19	1.1.1.2375.2
				fig|1428.368.peg.6268	2	99	ISNHVYVTSDNPIFK			-0.00150864	1732.88	578.633	1732.88	578.633	3	26	1.1.1.1792.2
				fig|1428.368.peg.6268	2	99	KEGSGEGYVTISDGTEEN		cleaved N-T@C-term; missed K-E@1	-0.000290429	1870.81	936.411	1870.81	936.411	2	17	1.1.1.1649.25
				fig|1428.368.peg.6268	2	99	KEGSGEGYVTISDGTEENTETLK		missed K-E@1	0.00591164	2443.13	815.384	2443.12	815.382	3	20	1.1.1.1691.10
				fig|1428.368.peg.6268	2	99	LDHVEVVEVGPLTGDALTR			0.00254846	2019.07	674.029	2019.06	674.029	3	27	1.1.1.2252.2
				fig|1428.368.peg.6268	2	99	LVECISDPIHTK	Carbamidomethyl(C)@4		0.000916732	1410.72	471.247	1410.72	471.247	3	17	1.1.1.1687.6
				fig|1428.368.peg.6268	2	99	LVECISDPIHTKEK	Carbamidomethyl(C)@4	missed K-E@12	0.00578513	1667.86	417.973	1667.86	417.971	4	13	1.1.1.1619.4
				fig|1428.368.peg.6268	2	99	MCLLEQVK	Carbamidomethyl(C)@2		0.0106375	1019.53	510.77	1019.51	510.764	2	13	1.1.1.1791.2
				fig|1428.368.peg.6268	2	99	NALVNGDFSAR	Deamidated(N)@5		-0.00229948	1163.55	582.785	1163.56	582.786	2	18	1.1.1.1720.3
				fig|1428.368.peg.6268	2	99	NLLHHGDFESPDWSGENR			0.00609081	2108.94	703.986	2108.93	703.984	3	26	1.1.1.1748.2
				fig|1428.368.peg.6268	2	99	NLLHHGDFESPDWSGENRWK		missed R-W@18	0.00616888	2423.11	606.785	2423.1	606.783	4	16	1.1.1.1807.3
				fig|1428.368.peg.6268	2	99	QILEAETWVQK			-0.00346073	1343.71	672.86	1343.71	672.862	2	19	1.1.1.1961.3
				fig|1428.368.peg.6268	2	99	SKDLELLVAR		cleaved N-S@N-term; missed K-D@2	-0.00107821	1142.66	572.34	1142.67	572.34	2	15	1.1.1.1742.5
				fig|1428.368.peg.6268	2	99	VTDYQVDQAAK			0.00179532	1236.6	619.308	1236.6	619.307	2	17	1.1.1.1517.17
				fig|1428.368.peg.6268	2	99	YLNMPNANTPQFSDK			-0.00598257	1738.79	870.404	1738.8	870.406	2	22	1.1.1.1867.3
				fig|1428.368.peg.6268	1.29243	96.08	MSYASNHYK			0.000662255	1099.48	367.499	1099.48	367.499	3	8	1.1.1.1432.2
				fig|1428.368.peg.6268	1.22185	95.4	LQSAITLK			-0.0016922	872.531	437.273	872.533	437.274	2	12	1.1.1.1634.3
				fig|1428.368.peg.6268	1.07058	93.44	DLELLVAR			0.000856684	927.54	464.777	927.539	464.777	2	12	1.1.1.2187.2
				fig|1428.368.peg.6268	0.735182	85.49	MNQDVTR			-0.00240492	862.394	432.204	862.397	432.206	2	9	1.1.1.1341.2
				fig|1428.368.peg.6268	0.413413	67.9	FIADEK			-0.000525654	721.364	361.689	721.365	361.69	2	8	1.1.1.1449.2
				fig|1428.368.peg.6268	0.09691	73.14	MPNANTPQFSDK		cleaved N-M@N-term	0.00127947	1348.61	675.312	1348.61	675.311	2	10	1.1.1.1616.21
				fig|1428.368.peg.6268	0.0634863	17.24	IGTTDGMAK			-0.00118135	892.431	447.223	892.432	447.223	2	8	1.1.1.1428.5
				fig|1428.368.peg.6268	0.0579919	15.9	VTARKEGSGEGYVTISDGTEENTETLK		missed R-K@4; missed K-E@5	0.00782452	2870.39	718.604	2870.38	718.602	4	10	1.1.1.1654.24
				fig|1428.368.peg.6268	0.0268721	67.1	ISNHVYVTSDN		cleaved N-P@C-term	0.000248509	1247.58	624.797	1247.58	624.796	2	12	1.1.1.1534.6
				fig|1428.368.peg.6268	0.00480371	66.22	ECISDPIHTK	Carbamidomethyl(C)@2	cleaved V-E@N-term	-0.00352381	1198.56	600.288	1198.57	600.29	2	12	1.1.1.1690.10
			Cry73Aa-like	fig|1428.368.peg.6270	2	99	EVYSTVYGR			0.00222871	1072.52	537.268	1072.52	537.267	2	14	1.1.1.1609.15
				fig|1428.368.peg.6270	2	99	FGAGWGLPSTEVEDNYTR			-0.00289199	1997.91	999.962	1997.91	999.963	2	24	1.1.1.2431.3
				fig|1428.368.peg.6270	2	99	FGTDPQAQWK			-0.00327083	1176.55	589.284	1176.56	589.285	2	17	1.1.1.1681.7
				fig|1428.368.peg.6270	2	99	GPGSTGGDLIQLASGYLQYSFPSTDNR			0.00363545	2800.33	934.452	2800.33	934.451	3	24	1.1.1.3920.2
				fig|1428.368.peg.6270	2	99	IYNNPYGVQIQLSR			-0.00418285	1663.86	832.939	1663.87	832.941	2	24	1.1.1.2070.3
				fig|1428.368.peg.6270	2	99	MNQNCNHNEYEILDSGNVSCQPK	Carbamidomethyl(C)@5; Carbamidomethyl(C)@20		0.00472428	2750.15	917.725	2750.15	917.723	3	19	1.1.1.1725.9
				fig|1428.368.peg.6270	2	99	NLYEAETVPIAFR			-0.000731038	1521.78	761.898	1521.78	761.899	2	22	1.1.1.2397.2
				fig|1428.368.peg.6270	2	99	NLYEAETVPIAFRK		missed R-K@13	-0.00104735	1649.88	550.966	1649.88	550.966	3	19	1.1.1.1963.2
				fig|1428.368.peg.6270	2	99	NQNCNHNEYEILDSGNVSCQPK	Carbamidomethyl(C)@4; Carbamidomethyl(C)@19	cleaved M-N@N-term	0.0050666	2619.11	874.045	2619.11	874.043	3	22	1.1.1.1710.7
				fig|1428.368.peg.6270	2	99	QAYDLAPNPTDYNK			-0.000492421	1608.74	805.378	1608.74	805.378	2	20	1.1.1.1742.8
				fig|1428.368.peg.6270	2	99	QAYDLAPNPTDYNKYPYLDPYSKDPIYGK		missed K-Y@14; missed K-D@23	0.0137324	3408.63	853.165	3408.62	853.162	4	20	1.1.1.2396.2
				fig|1428.368.peg.6270	2	99	QFMDAVEYLVSQK	Gln->pyro-Glu@N-term		-0.000287883	1539.73	770.871	1539.73	770.871	2	22	1.1.1.4427.2
				fig|1428.368.peg.6270	2	99	QFTSTNTVIEYAMPSFR	Gln->pyro-Glu@N-term		-0.00235056	1973.92	987.966	1973.92	987.967	2	24	1.1.1.3627.2
				fig|1428.368.peg.6270	2	99	RFGTDPQAQWK		missed R-F@1	0.000797254	1332.66	667.336	1332.66	667.336	2	15	1.1.1.1613.3
				fig|1428.368.peg.6270	2	99	SLTSTNTIATDKTTQIPAVK		cleaved N-S@N-term; missed K-T@12	0.00788171	2089.13	697.385	2089.13	697.383	3	17	1.1.1.1712.13
				fig|1428.368.peg.6270	2	99	SPHLVTELTK			0.00100085	1123.62	562.82	1123.62	562.819	2	16	1.1.1.1623.14
				fig|1428.368.peg.6270	2	99	SSVDAIESTLVR		cleaved N-S@N-term	0.00017239	1275.67	638.841	1275.67	638.841	2	19	1.1.1.2025.2
				fig|1428.368.peg.6270	2	99	TAEYTNHCTNTYDK	Carbamidomethyl(C)@8		0.00150873	1716.71	573.243	1716.7	573.242	3	14	1.1.1.1435.6
				fig|1428.368.peg.6270	2	99	TVHNVSATDIGNLSLSLGAIPFGFSFYNK			0.00782101	3068.57	1023.86	3068.56	1023.86	3	27	1.1.1.3870.2
				fig|1428.368.peg.6270	2	99	VGGFEVPLLTTFAQAANLHLLLLR			0.0122581	2592.49	865.171	2592.48	865.167	3	20	1.1.1.4883.2
				fig|1428.368.peg.6270	2	99	YASTNGSTLTLK	Deamidated(N)@5		-0.00162935	1255.63	628.821	1255.63	628.822	2	19	1.1.1.1663.7
				fig|1428.368.peg.6270	2	99	YASTNGSTLTLKK	Deamidated(N)@5	missed K-K@12	-0.00168257	1383.72	692.869	1383.72	692.87	2	20	1.1.1.1544.2
				fig|1428.368.peg.6270	2	99	YYTAPVDWNLFNDFRR		missed R-R@15	-0.00242652	2075.98	693.002	2075.99	693.002	3	15	1.1.1.3073.2
				fig|1428.368.peg.6270	1.88606	99	PYSKDPIYGK		cleaved D-P@N-term; missed K-D@4	0.000396417	1166.6	389.873	1166.6	389.873	3	12	1.1.1.1508.2
				fig|1428.368.peg.6270	1.82391	98.92	TTQIPAVK			-0.00188639	856.5	429.257	856.502	429.258	2	12	1.1.1.1535.3
				fig|1428.368.peg.6270	1.40894	97.21	LEGVQR			-0.000542347	700.386	351.2	700.387	351.201	2	8	1.1.1.1391.2
				fig|1428.368.peg.6270	0.995679	92.62	SEAVSRLEGVQR		missed R-L@6	-0.000509207	1329.7	665.857	1329.7	665.857	2	9	1.1.1.1526.16
				fig|1428.368.peg.6270	0.879426	99	YQGVMNTSIGR		cleaved N-Y@N-term	-0.00182734	1224.59	613.302	1224.59	613.303	2	14	1.1.1.1661.4
				fig|1428.368.peg.6270	0.44855	95.7	SLTSTNTIATDK		cleaved N-S@N-term	-0.00153923	1250.63	626.324	1250.64	626.325	2	10	1.1.1.1541.20
				fig|1428.368.peg.6270	0.295849	98.79	HLVTELTK		cleaved P-H@N-term	-0.00106903	939.538	470.776	939.539	470.777	2	11	1.1.1.1527.3
				fig|1428.368.peg.6270	0.280669	91.68	TIATDKTTQIPAVK		cleaved N-T@N-term; missed K-T@6	0.00162778	1485.84	496.288	1485.84	496.287	3	10	1.1.1.1600.5
				fig|1428.368.peg.6270	0.0510982	91.99	ITNTLHYVGS		cleaved S-S@C-term	5.11001e-05	1103.56	552.788	1103.56	552.788	2	11	1.1.1.1646.7
				fig|1428.368.peg.6270	0.0362122	34.19	LTPYNSNTKVIK	Deamidated(N)@5	missed K-V@9	0.00630722	1377.76	460.26	1377.75	460.257	3	10	1.1.1.1605.3
				fig|1428.368.peg.6270	0.0105502	45.01	TVHNVSATDIGN		cleaved N-L@C-term	0.00113192	1226.59	614.302	1226.59	614.302	2	10	1.1.1.1530.18
				fig|1428.368.peg.6270	0.00348833	21.79	NNQHITTVGY		cleaved Y-S@C-term	-0.0011009	1145.55	573.78	1145.55	573.781	2	8	1.1.1.1592.15
		2	Cry45Aa-like_1	fig|1428.368.peg.6440	2	99	GVTPNPTSQPIVR			-0.00527273	1364.74	683.375	1364.74	683.378	2	19	1.1.1.1668.10
				fig|1428.368.peg.6440	2	99	ILHEMGYTDSTHIYVAHFIGSGK			-0.0253738	2575.23	859.416	2575.25	859.425	3	19	1.1.1.1919.5
				fig|1428.368.peg.6440	2	99	LYNLNVQVPDPIVTDNPTNSAVAR			0.00259105	2609.35	870.79	2609.34	870.789	3	25	1.1.1.2116.3
				fig|1428.368.peg.6440	2	99	MGLQSYVNVVETPLPGR			0.00599059	1858.97	620.663	1858.96	620.661	3	22	1.1.1.2117.2
				fig|1428.368.peg.6440	2	99	NKYEFVNAEMSWLNGQYPVR		missed K-Y@2	0.00595273	2444.16	815.729	2444.16	815.727	3	25	1.1.1.2212.2
				fig|1428.368.peg.6440	2	99	NVVLECDIDGYTMCYYR	Carbamidomethyl(C)@6; Carbamidomethyl(C)@14		0.00657363	2169.92	724.315	2169.92	724.313	3	23	1.1.1.2107.3
				fig|1428.368.peg.6440	2	99	PIVTDNPTNSAVAR		cleaved D-P@N-term	-0.00451001	1453.75	727.881	1453.75	727.884	2	21	1.1.1.1646.6
				fig|1428.368.peg.6440	2	99	RSGLDIPIFDPIVSR		missed R-S@1	0.000737053	1683.93	562.318	1683.93	562.318	3	18	1.1.1.2216.3
				fig|1428.368.peg.6440	2	99	RSGLDIPIFDPIVSRQ		missed R-S@1; missed R-Q@15	-0.000643371	1811.99	605.004	1811.99	605.004	3	23	1.1.1.2211.2
				fig|1428.368.peg.6440	2	99	SEAGFLFAK			0.000365941	968.497	485.256	968.497	485.256	2	10	1.1.1.1890.3
				fig|1428.368.peg.6440	2	99	SGLDIPIFDPIVSR			-5.67158e-05	1527.83	764.922	1527.83	764.922	2	22	1.1.1.2518.2
				fig|1428.368.peg.6440	2	99	SGLDIPIFDPIVSRQ		missed R-Q@14	-0.00207931	1655.89	828.95	1655.89	828.951	2	23	1.1.1.2569.2
				fig|1428.368.peg.6440	2	99	TFIVQTGPFDK		cleaved H-T@N-term	-0.00195603	1251.65	626.831	1251.65	626.832	2	15	1.1.1.1905.2
				fig|1428.368.peg.6440	2	99	TYTTEISR			-0.00283587	969.474	485.744	969.477	485.746	2	11	1.1.1.1540.4
				fig|1428.368.peg.6440	2	99	VQVPDPIVTDNPTNSAVAR		cleaved N-V@N-term	-0.00743775	1992.02	665.014	1992.03	665.016	3	19	1.1.1.1880.7
				fig|1428.368.peg.6440	1.79588	99	EYQIPVTR			-0.00114364	1004.53	503.271	1004.53	503.272	2	13	1.1.1.1697.4
				fig|1428.368.peg.6440	1.74473	99	SGLDIPIFD		cleaved D-P@C-term	-0.00110113	975.49	488.752	975.491	488.753	2	15	1.1.1.2575.2
				fig|1428.368.peg.6440	1.5376	99	ILHEMGYTDSTHIYVAH		cleaved H-F@C-term	-0.000734773	1985.93	497.49	1985.93	497.49	4	14	1.1.1.1761.4
				fig|1428.368.peg.6440	1.16115	95.67	TVGYTETLTDSQSTTTEHGVTAGASVTVK			0.00632647	2940.43	981.149	2940.42	981.147	3	12	1.1.1.1820.17
				fig|1428.368.peg.6440	1.04096	94.26	YVNHSMAR			0.000887841	976.456	489.235	976.455	489.235	2	10	1.1.1.1307.2
				fig|1428.368.peg.6440	0.931814	92.52	AILDLKK		cleaved M-A@N-term; missed K-K@6	0.000167719	799.517	400.766	799.517	400.766	2	11	1.1.1.1607.2
				fig|1428.368.peg.6440	0.59176	99	THTFIVQTGPFDK		cleaved T-T@N-term	0.00201292	1489.76	497.593	1489.76	497.593	3	10	1.1.1.1821.6
				fig|1428.368.peg.6440	0.563837	81.34	KLTEDYWR		missed K-L@1	0.00212777	1109.55	370.858	1109.55	370.857	3	9	1.1.1.1685.3
				fig|1428.368.peg.6440	0.0457575	81.24	VVETPLPGR		cleaved N-V@N-term	-0.00344575	966.546	484.281	966.55	484.282	2	8	1.1.1.1623.10
				fig|1428.368.peg.6440	0.0254883	74.42	ILHEMGYTDSTHIY		cleaved Y-V@C-term	0.00579269	1678.77	560.598	1678.77	560.596	3	9	1.1.1.1802.4
				fig|1428.368.peg.6440	0.0141246	77.7	AILDLK	Carbamidomethyl@N-term	cleaved M-A@N-term	-0.000323743	728.443	365.229	728.443	365.229	2	7	1.1.1.1730.2
				fig|1428.368.peg.6440	0.00788851	25.14	LYNLNVQVPD		cleaved D-P@C-term	0.000570463	1173.6	587.809	1173.6	587.809	2	11	1.1.1.2011.2
			Cry45Aa-like_2	fig|1428.368.peg.5334	2	99	DPGNIYNYNMK	Deamidated(N)@4		-0.00110576	1328.57	665.292	1328.57	665.293	2	14	1.1.1.1788.14
				fig|1428.368.peg.5334	2	99	GTTPNPTSQPIVR			-0.00190694	1366.72	684.367	1366.72	684.367	2	13	1.1.1.1626.10
				fig|1428.368.peg.5334	2	99	GYWVAISQILMENGVPGIR			0.0032938	2102.1	701.708	2102.1	701.707	3	24	1.1.1.3185.2
				fig|1428.368.peg.5334	2	99	MGLQSFVNVVER		cleaved R-P@C-term	0.000282471	1377.71	689.861	1377.71	689.861	2	21	1.1.1.2134.2
				fig|1428.368.peg.5334	2	99	MGLQSFVNVVERPLLGR			0.0088952	1914.06	639.027	1914.05	639.024	3	20	1.1.1.2520.3
				fig|1428.368.peg.5334	2	99	PGNIYNYNMK		cleaved D-P@N-term	-0.000923512	1212.56	607.287	1212.56	607.287	2	11	1.1.1.1703.13
				fig|1428.368.peg.5334	2	99	PIVTDNPTNSAYAK	Deamidated(N)@9	cleaved D-P@N-term	-0.00116541	1490.72	746.369	1490.73	746.37	2	19	1.1.1.1646.7
				fig|1428.368.peg.5334	2	99	SEAGLLFAK			-0.00192754	934.51	468.262	934.512	468.263	2	12	1.1.1.1827.2
				fig|1428.368.peg.5334	2	99	VPDPIVTDNPTNSAYAK			-0.00415183	1800.89	901.45	1800.89	901.452	2	18	1.1.1.1761.20
				fig|1428.368.peg.5334	2	99	YNPNPYTAHFTGSGK			0.000406924	1652.76	551.927	1652.76	551.927	3	17	1.1.1.1695.3
				fig|1428.368.peg.5334	1.18709	99	DPGNIYNYNMKVPDPIVTDNPTNSAYAK	Oxidation(M)@10; Deamidated(N)@20	missed K-V@11	0.0121596	3127.46	1043.49	3127.44	1043.49	3	16	1.1.1.1931.3
				fig|1428.368.peg.5334	1.08092	99	EYQIPVTGR	Deamidated(Q)@3		0.0151925	1062.55	532.282	1062.53	532.275	2	14	1.1.1.1708.3
				fig|1428.368.peg.5334	0.617983	86.94	AIIDLLK		cleaved M-A@N-term	0.00127661	784.507	393.261	784.506	393.26	2	11	1.1.1.1989.2
				fig|1428.368.peg.5334	0.47237	97.78	SFIVQTGPFNK		cleaved H-S@N-term	-0.00141787	1236.65	619.332	1236.65	619.332	2	12	1.1.1.1885.5
				fig|1428.368.peg.5334	0.122053	40.57	SSGYLGR			-0.000424206	738.366	370.19	738.366	370.19	2	6	1.1.1.1472.4
				fig|1428.368.peg.5334	0.102373	92.51	PYTAHFTGSGK		cleaved N-P@N-term	0.000226245	1164.56	389.193	1164.56	389.193	3	9	1.1.1.1511.5
				fig|1428.368.peg.5334	0.00524306	29.41	IVQTGPFNK		cleaved F-I@N-term	-0.00225472	1002.55	502.281	1002.55	502.282	2	8	1.1.1.1612.2
			Cry45Aa-like_3	fig|1428.368.peg.6442	2	99	GLDIPIFDPVVSR			0.00248423	1426.78	714.399	1426.78	714.398	2	19	1.1.1.2438.2
				fig|1428.368.peg.6442	2	99	GLDIPIFDPVVSRQ		missed R-Q@13	0.0048986	1554.85	778.43	1554.84	778.428	2	23	1.1.1.2389.2
				fig|1428.368.peg.6442	2	99	GYTPNPTSQPIVR			-0.00488636	1428.73	715.373	1428.74	715.375	2	17	1.1.1.1708.4
				fig|1428.368.peg.6442	2	99	ITYPQFGIAHFTGSGK		cleaved N-I@N-term	0.000247863	1722.87	575.298	1722.87	575.298	3	16	1.1.1.1953.2
				fig|1428.368.peg.6442	2	99	LTGKMGLQSYVDVVETPLSGR		missed K-M@4	0.00413385	2249.18	750.733	2249.17	750.731	3	24	1.1.1.2100.4
				fig|1428.368.peg.6442	2	99	MGLQSYVDVVETPLSGR	Dethiomethyl(M)@1		0.00349295	1801.92	601.649	1801.92	601.648	3	20	1.1.1.1975.2
				fig|1428.368.peg.6442	2	99	MSVPDPVVIDNPTNSALAR			0.00217893	1995.01	666.011	1995.01	666.01	3	23	1.1.1.1992.3
				fig|1428.368.peg.6442	2	99	MTGYNGGVISEILDMQGVANITYPQFGIAHFTGSGK	Deamidated(N)@5		0.0165942	3773.82	944.463	3773.81	944.459	4	25	1.1.1.3169.2
				fig|1428.368.peg.6442	2	99	NVVLECDITGTTTCVYR	Carbamidomethyl(C)@6; Carbamidomethyl(C)@14		-0.00402566	1999.93	1000.97	1999.93	1000.97	2	18	1.1.1.1907.3
				fig|1428.368.peg.6442	2	99	PVVIDNPTNSALAR		cleaved D-P@N-term	-0.0018097	1465.79	733.901	1465.79	733.902	2	16	1.1.1.1770.7
				fig|1428.368.peg.6442	2	99	RGLDIPIFDPVVSR		missed R-G@1	0.0022517	1582.89	528.636	1582.88	528.635	3	17	1.1.1.2136.2
				fig|1428.368.peg.6442	2	99	RGLDIPIFDPVVSRQ		missed R-G@1; missed R-Q@14	0.000183872	1710.94	571.321	1710.94	571.321	3	21	1.1.1.2123.2
				fig|1428.368.peg.6442	2	99	SVPDPVVIDNPTNSALAR		cleaved M-S@N-term	-0.00604707	1863.96	932.989	1863.97	932.992	2	17	1.1.1.1903.3
				fig|1428.368.peg.6442	2	99	SWEDSLQITVPPGYQTTHTFIVQTGPFDK			0.00696413	3291.62	1098.21	3291.61	1098.21	3	21	1.1.1.2375.2
				fig|1428.368.peg.6442	2	99	TITFNETQSDSQSTTTEHGITAGVSATVK			-0.00487673	3010.43	1004.49	3010.44	1004.49	3	20	1.1.1.1810.9
				fig|1428.368.peg.6442	2	99	YPGNSVDR	Deamidated(N)@4		-0.000652225	907.403	454.709	907.404	454.709	2	12	1.1.1.1457.2
				fig|1428.368.peg.6442	1.18046	96.02	KYQIPLTGR		missed K-Y@1	0.00256036	1074.62	359.214	1074.62	359.213	3	12	1.1.1.1673.2
				fig|1428.368.peg.6442	0.219683	53.11	YQIPLTGR			0.00184709	946.525	474.27	946.524	474.269	2	10	1.1.1.1772.6
				fig|1428.368.peg.6442	0.0925886	28.92	YQIPLTGRR		missed R-R@8	0.00163543	1102.63	368.549	1102.62	368.549	3	7	1.1.1.1680.2
			Cry32Ea-like	fig|1428.368.peg.1765	2	99	AIAEQAR			-0.00151234	757.407	379.711	757.408	379.711	2	10	1.1.1.1273.2
				fig|1428.368.peg.1765	2	99	AQAITELQGIQAAIR			0.00190238	1581.89	791.95	1581.88	791.949	2	26	1.1.1.2040.2
				fig|1428.368.peg.1765	2	99	AVNALFK	Deamidated(N)@3		0.000500563	762.428	382.221	762.428	382.221	2	10	1.1.1.1760.2
				fig|1428.368.peg.1765	2	99	AVQAAQSAIQAL		cleaved L-F@C-term	-0.000799018	1169.64	585.827	1169.64	585.828	2	16	1.1.1.1914.3
				fig|1428.368.peg.1765	2	99	AVQAAQSAIQALFTDQNQTR			0.00152247	2160.09	721.039	2160.09	721.038	3	27	1.1.1.2170.2
				fig|1428.368.peg.1765	2	99	CEWGESGELFADELGPVR	Carbamidomethyl(C)@1		-0.000934039	2049.91	1025.96	2049.91	1025.96	2	23	1.1.1.2227.2
				fig|1428.368.peg.1765	2	99	DAACNWEKNPNNPQLK	Carbamidomethyl(C)@4	missed K-N@8	0.00132977	1897.88	633.632	1897.87	633.632	3	24	1.1.1.1656.12
				fig|1428.368.peg.1765	2	99	DLIIDGGYQGER			-0.00037416	1334.65	668.33	1334.65	668.331	2	17	1.1.1.1819.8
				fig|1428.368.peg.1765	2	99	DQYYNNNEYEILDHGR		cleaved M-D@N-term	0.0017606	2041.88	681.633	2041.88	681.633	3	15	1.1.1.1832.12
				fig|1428.368.peg.1765	2	99	DQYYNNNEYEILDHGRR		cleaved M-D@N-term; missed R-R@16	0.00391237	2197.98	550.503	2197.98	550.502	4	12	1.1.1.1771.7
				fig|1428.368.peg.1765	2	99	EGAGEGYVTISDGTEDNTETVK			0.00403627	2271.01	758.01	2271	758.008	3	14	1.1.1.1761.18
				fig|1428.368.peg.1765	2	99	ELEVFVQR			0.000800733	1018.55	510.28	1018.54	510.28	2	11	1.1.1.1829.5
				fig|1428.368.peg.1765	2	99	ERNMTNQPSEVSGTNAYPGNNNR	Deamidated(N)@6	missed R-N@2	-0.00716322	2550.11	851.043	2550.12	851.046	3	13	1.1.1.1615.18
				fig|1428.368.peg.1765	2	99	ETVRTQFVATNTILYNR		missed R-T@4	-0.000437054	2025.06	676.029	2025.06	676.029	3	15	1.1.1.1845.13
				fig|1428.368.peg.1765	2	99	FTAGVETPR			-0.00259473	976.495	489.255	976.498	489.256	2	15	1.1.1.1603.2
				fig|1428.368.peg.1765	2	99	GFVGNSKELEVFVQR		missed K-E@7	0.00247616	1707.9	570.306	1707.89	570.305	3	20	1.1.1.1947.3
				fig|1428.368.peg.1765	2	99	GMEPDLLSAIPVFWDINSSYNSSSGLPCR	Carbamidomethyl(C)@28		0.00782065	3211.5	1071.51	3211.5	1071.51	3	23	1.1.1.3398.2
				fig|1428.368.peg.1765	2	99	GMNSVCETCDPNCMPEIPSGGSICDRPSQYGNR	Carbamidomethyl(C)@6; Carbamidomethyl(C)@9; Carbamidomethyl(C)@13; Carbamidomethyl(C)@24		0.0111393	3744.53	937.139	3744.52	937.136	4	19	1.1.1.1872.10
				fig|1428.368.peg.1765	2	99	GPGSTGGDLVK			-0.00286366	986.5	494.257	986.503	494.259	2	14	1.1.1.1507.4
				fig|1428.368.peg.1765	2	99	GSETSLLTAYVEAATLHLGLLK			0.0040973	2286.25	763.091	2286.25	763.09	3	25	1.1.1.3031.2
				fig|1428.368.peg.1765	2	99	GYITYGNASVVK			-0.00151154	1270.65	636.334	1270.66	636.335	2	16	1.1.1.1761.12
				fig|1428.368.peg.1765	2	99	IEFIPIEGTLEEYQANQDLEK			0.00701955	2478.22	827.082	2478.22	827.079	3	24	1.1.1.2457.3
				fig|1428.368.peg.1765	2	99	IGNASVLVLSNWSANLSQNVCVNPAHGYILR	Carbamidomethyl(C)@21		0.00435104	3365.74	1122.92	3365.73	1122.92	3	18	1.1.1.2545.3
				fig|1428.368.peg.1765	2	99	IGTTDGVANIDNLEVIEANPLTGEALAR			0.0054492	2865.48	956.166	2865.47	956.165	3	25	1.1.1.2551.3
				fig|1428.368.peg.1765	2	99	IHIYNEGGGDLILDK			0.000355883	1655.85	552.958	1655.85	552.958	3	21	1.1.1.1860.6
				fig|1428.368.peg.1765	2	99	IHIYNEGGGDLILDKIEFIPIEGTLEEYQANQDLEK		missed K-I@15	0.0249442	4116.08	1030.03	4116.06	1030.02	4	31	1.1.1.2753.2
				fig|1428.368.peg.1765	2	99	IPYVYHPFLQGSLPAVPGETYDIFQQLSNAIGK			0.0151753	3661.9	916.482	3661.88	916.478	4	22	1.1.1.3230.2
				fig|1428.368.peg.1765	2	99	KEGAGEGYVTISDGTEDN		cleaved N-T@C-term; missed K-E@1	-0.00751773	1840.79	921.402	1840.8	921.405	2	14	1.1.1.1703.22
				fig|1428.368.peg.1765	2	99	KEGAGEGYVTISDGTEDNTETVK		missed K-E@1	-0.000605854	2399.1	800.706	2399.1	800.706	3	24	1.1.1.1708.5
				fig|1428.368.peg.1765	2	99	KEGAGEGYVTISDGTEDNTETVKFTAGVETPR		missed K-E@1; missed K-F@23	-0.00619614	3357.58	840.402	3357.58	840.404	4	19	1.1.1.1868.5
				fig|1428.368.peg.1765	2	99	KETLPVTLPVGSEDR		missed K-E@1	0.00120323	1639.88	547.634	1639.88	547.633	3	18	1.1.1.1826.2
				fig|1428.368.peg.1765	2	99	LESIELIR			-0.000470071	971.565	486.79	971.565	486.79	2	13	1.1.1.1872.3
				fig|1428.368.peg.1765	2	99	LQGSLPAVPGETYDIFQQLSNAIGK		cleaved F-L@N-term	0.00640855	2645.38	882.799	2645.37	882.797	3	23	1.1.1.3116.2
				fig|1428.368.peg.1765	2	99	LRPDITLNHILHAETLVQK			0.00609775	2210.26	737.76	2210.25	737.758	3	28	1.1.1.1997.2
				fig|1428.368.peg.1765	2	99	LSYVGLGMLNSDYR			-0.00303945	1586.77	794.394	1586.78	794.395	2	24	1.1.1.2118.3
				fig|1428.368.peg.1765	2	99	LSYVGLGMLNSDYRDFVSSPTR		missed R-D@14	0.004938	2476.21	826.411	2476.21	826.409	3	20	1.1.1.2244.2
				fig|1428.368.peg.1765	2	99	LVECMSDEIYPQEK	Carbamidomethyl(C)@4		-0.00184949	1739.77	870.894	1739.77	870.895	2	15	1.1.1.1802.13
				fig|1428.368.peg.1765	2	99	LYEVPTKSQLTR		missed K-S@7	0.000295842	1433.79	478.937	1433.79	478.937	3	10	1.1.1.1669.9
				fig|1428.368.peg.1765	2	99	MCLLDLVK	Carbamidomethyl(C)@2		0.000550424	990.525	496.27	990.524	496.269	2	13	1.1.1.2147.2
				fig|1428.368.peg.1765	2	99	MDQYYNNNEYEILDHGR	Oxidation(M)@1; Dehydrated(D)@2		0.00150227	2170.9	724.642	2170.9	724.641	3	21	1.1.1.1825.7
				fig|1428.368.peg.1765	2	99	MDQYYNNNEYEILDHGRR	Deamidated(N)@7	missed R-R@17	0.00598509	2330.01	583.509	2330	583.508	4	19	1.1.1.1795.9
				fig|1428.368.peg.1765	2	99	MDSYVSTSLMTAQNGSPLSGYVTK	Deamidated(N)@14		0.00143875	2537.17	846.73	2537.17	846.729	3	22	1.1.1.2100.5
				fig|1428.368.peg.1765	2	99	MITQIPAVK		cleaved N-M@N-term	-0.00127878	999.577	500.796	999.579	500.797	2	14	1.1.1.1759.4
				fig|1428.368.peg.1765	2	99	MMTAAEQITNK	Oxidation(M)@1		-0.00284718	1252.58	627.295	1252.58	627.297	2	19	1.1.1.1570.2
				fig|1428.368.peg.1765	2	99	MMTAAEQITNKAIAEQAR	Deamidated(Q)@7	missed K-A@11	0.0107404	1976.98	660	1976.97	659.996	3	20	1.1.1.1792.13
				fig|1428.368.peg.1765	2	99	NGDFSAGLSNWQGAEGALVQK			0.0102492	2148.03	717.019	2148.02	717.015	3	24	1.1.1.2063.5
				fig|1428.368.peg.1765	2	99	NLGIWVGFK		cleaved Q-N@N-term	0.00122046	1032.58	517.296	1032.58	517.295	2	13	1.1.1.2119.3
				fig|1428.368.peg.1765	2	99	NMNVPYGIPPTNPCDR	Carbamidomethyl(C)@14		-0.00103425	1843.83	922.924	1843.83	922.925	2	15	1.1.1.1851.17
				fig|1428.368.peg.1765	2	99	NMNVPYGIPPTNPCDRDYQR	Carbamidomethyl(C)@14	missed R-D@16	-0.00057812	2406.08	1204.05	2406.08	1204.05	2	14	1.1.1.1822.2
				fig|1428.368.peg.1765	2	99	NMTMAVLDIVAVWPTFDIK			0.00565103	2163.12	1082.57	2163.11	1082.56	2	21	1.1.1.3700.2
				fig|1428.368.peg.1765	2	99	NMTNQPSEVSGTNAYPGNNNR			-0.0127918	2263.97	755.665	2263.99	755.67	3	22	1.1.1.1617.7
				fig|1428.368.peg.1765	2	99	NPNNPQLK			-0.00365041	923.479	462.747	923.482	462.749	2	11	1.1.1.1367.3
				fig|1428.368.peg.1765	2	99	NPNNPQLKETVR		missed K-E@8	-0.000476682	1408.74	470.588	1408.74	470.588	3	12	1.1.1.1459.4
				fig|1428.368.peg.1765	2	99	NTLQLNVTDYLVDQAAK			0.00139325	1904.99	953.5	1904.98	953.499	2	18	1.1.1.2138.5
				fig|1428.368.peg.1765	2	99	NVLRNGDFSAGLSNWQGAEGALVQK	Deamidated(N)@5	missed R-N@4	0.0020773	2631.31	878.109	2631.3	878.109	3	28	1.1.1.2074.3
				fig|1428.368.peg.1765	2	99	NYQSESFGITPYSDETTMMNGPSNNYEASAYR	Deamidated(N)@20		0.00394427	3624.5	1209.17	3624.49	1209.17	3	22	1.1.1.2061.2
				fig|1428.368.peg.1765	2	99	PVFWDINSSYNSSSGLPCR	Carbamidomethyl(C)@18	cleaved I-P@N-term	-5.97063	2179.02	1090.52	2184.99	1093.5	2	23	1.1.1.2940.4
				fig|1428.368.peg.1765	2	99	SANLSQNVCVNPAHGYILR	Carbamidomethyl(C)@9	cleaved W-S@N-term	0.00374865	2112.06	705.026	2112.05	705.025	3	17	1.1.1.1841.6
				fig|1428.368.peg.1765	2	99	SDAKNTLQLNVTDYLVDQAAK		missed K-N@4	-0.00012617	2306.18	769.732	2306.18	769.732	3	28	1.1.1.2079.4
				fig|1428.368.peg.1765	2	99	SPIQEGYK			-0.00124606	920.459	461.237	920.46	461.237	2	12	1.1.1.1505.5
				fig|1428.368.peg.1765	2	99	SPIQEGYKER		missed K-E@8	0.00245449	1205.61	402.876	1205.6	402.875	3	11	1.1.1.1474.3
				fig|1428.368.peg.1765	2	99	TAALGIPFTHPFNDTSLIK			0.00433295	2042.09	681.703	2042.08	681.702	3	20	1.1.1.2186.2
				fig|1428.368.peg.1765	2	99	TGLQQQYNTGDWNK		cleaved N-T@N-term	-0.00595636	1651.75	826.884	1651.76	826.887	2	18	1.1.1.1738.20
				fig|1428.368.peg.1765	2	99	THPFNDTSLIK		cleaved F-T@N-term	-0.000162537	1271.65	424.891	1271.65	424.891	3	12	1.1.1.1703.3
				fig|1428.368.peg.1765	2	99	TQFVATNTILYNR			-0.00137239	1539.8	770.909	1539.8	770.91	2	17	1.1.1.1886.9
				fig|1428.368.peg.1765	2	99	TVEIFPETNHVCIEIGETAGTFK	Carbamidomethyl(C)@12		0.00039219	2591.26	864.76	2591.26	864.76	3	16	1.1.1.2118.5
				fig|1428.368.peg.1765	2	99	TVYTPLEGNVGGN		cleaved N-W@C-term	0.000782826	1319.64	660.826	1319.64	660.825	2	18	1.1.1.1846.11
				fig|1428.368.peg.1765	2	99	TVYTPLEGNVGGNWLSPEPVPSIDVIEGNIVDTPGLFK			0.0276344	4023.08	1006.78	4023.05	1006.77	4	23	1.1.1.3234.2
				fig|1428.368.peg.1765	2	99	TYPVLTNQTIPQDMACDSCDAGTVMR	Carbamidomethyl(C)@16; Carbamidomethyl(C)@19		-0.00181512	2943.29	982.102	2943.29	982.103	3	23	1.1.1.2002.3
				fig|1428.368.peg.1765	2	99	VTDYLVDQAAK		cleaved N-V@N-term	-0.00185654	1221.62	611.818	1221.62	611.819	2	16	1.1.1.1720.11
				fig|1428.368.peg.1765	2	99	WLHNISFEAIDGGVNTSVIK			0.00156593	2199.13	734.052	2199.13	734.051	3	24	1.1.1.2077.3
				fig|1428.368.peg.1765	2	99	WYNTGLQQQYN		cleaved N-T@C-term	-0.00149662	1413.63	707.822	1413.63	707.823	2	16	1.1.1.1858.7
				fig|1428.368.peg.1765	2	99	WYNTGLQQQYNTGDWNK			0.000704904	2114.95	1058.48	2114.94	1058.48	2	20	1.1.1.1899.5
				fig|1428.368.peg.1765	2	99	YAAYIGYGWTHVSADENNQIYPNMITQIPAVK			0.0114641	3626.76	1209.93	3626.75	1209.92	3	20	1.1.1.2347.2
				fig|1428.368.peg.1765	2	99	YASNADVNVFCTLQK	Carbamidomethyl(C)@11		0.00110017	1728.82	865.415	1728.81	865.414	2	17	1.1.1.1893.10
				fig|1428.368.peg.1765	2	99	YGDFDSDNWSGENGWK	Deamidated(N)@13		0.0016994	1876.72	939.367	1876.72	939.366	2	25	1.1.1.1968.3
				fig|1428.368.peg.1765	2	99	YGDFDSDNWSGENGWKTSSNVSVR	Deamidated(N)@13	missed K-T@16	0.000546534	2707.14	903.388	2707.14	903.388	3	16	1.1.1.1921.11
				fig|1428.368.peg.1765	2	99	YLHMPGANIPQFSDTVFPTYAYQK			0.00367636	2787.34	930.121	2787.34	930.12	3	21	1.1.1.2235.3
				fig|1428.368.peg.1765	2	99	YLPVGNVWHVTN		cleaved N-Q@C-term	0.00101396	1397.71	699.862	1397.71	699.862	2	18	1.1.1.1985.2
				fig|1428.368.peg.1765	2	99	YLPVGNVWHVTNQLFSSGGASVVTGWLFR			0.0116257	3190.65	1064.56	3190.64	1064.55	3	22	1.1.1.3201.2
				fig|1428.368.peg.1765	2	99	YPLAQAPGSVLQNMDYK			0.0037481	1893.93	947.974	1893.93	947.972	2	21	1.1.1.1980.4
				fig|1428.368.peg.1765	2	99	YPLAQAPGSVLQNMDYKELMNK		missed K-E@17	0.00182058	2509.24	837.419	2509.23	837.419	3	26	1.1.1.2104.3
				fig|1428.368.peg.1765	1.67778	97.87	ITQIPAVK		cleaved M-I@N-term	-0.000296772	868.538	435.276	868.538	435.276	2	12	1.1.1.1642.5
				fig|1428.368.peg.1765	1.42022	99	VATNTILYNR		cleaved F-V@N-term	-0.00160608	1163.63	582.821	1163.63	582.822	2	8	1.1.1.1693.12
				fig|1428.368.peg.1765	1.3279	95.34	AVNALFKSDAK		missed K-S@7	0.000769628	1162.64	388.552	1162.63	388.552	3	10	1.1.1.1638.4
				fig|1428.368.peg.1765	1.18046	99	SKELEVFVQR		cleaved N-S@N-term; missed K-E@2	-0.00268804	1233.67	617.842	1233.67	617.843	2	11	1.1.1.1729.11
				fig|1428.368.peg.1765	0.906578	99	ADVNVFCTLQK	Carbamidomethyl(C)@7	cleaved N-A@N-term	-0.00185463	1293.64	647.826	1293.64	647.827	2	12	1.1.1.1890.10
				fig|1428.368.peg.1765	0.906578	87.59	LYEVPTK			5.02424e-05	848.464	425.24	848.464	425.239	2	11	1.1.1.1606.4
				fig|1428.368.peg.1765	0.89279	98.49	MTAAEQITNK		cleaved M-M@N-term	-0.00264353	1105.54	553.778	1105.54	553.779	2	10	1.1.1.1536.7
				fig|1428.368.peg.1765	0.876148	86.67	ETLPVTLPVGSEDR			0.000288419	1511.78	756.899	1511.78	756.899	2	12	1.1.1.1917.8
				fig|1428.368.peg.1765	0.838632	85.51	KAVNALFK		missed K-A@1	-0.000953396	889.538	445.776	889.539	445.777	2	10	1.1.1.1588.5
				fig|1428.368.peg.1765	0.823909	84.98	LTQSDMR			-0.000278525	849.401	425.708	849.401	425.708	2	8	1.1.1.1403.3
				fig|1428.368.peg.1765	0.764472	82.84	ADDPIFK			-0.000534569	804.401	403.208	804.402	403.208	2	11	1.1.1.1667.3
				fig|1428.368.peg.1765	0.735182	81.55	DFVSSPTR			-0.00102755	907.439	454.727	907.44	454.727	2	11	1.1.1.1569.2
				fig|1428.368.peg.1765	0.707744	98.93	GPSNNYEASAYR		cleaved N-G@N-term	-0.00528433	1327.57	664.794	1327.58	664.797	2	12	1.1.1.1562.10
				fig|1428.368.peg.1765	0.634512	99	SICDRPSQYGNR	Carbamidomethyl(C)@3	cleaved G-S@N-term	-0.00173884	1451.66	484.892	1451.66	484.893	3	11	1.1.1.1489.9
				fig|1428.368.peg.1765	0.496209	99	FGLQWGMDPSIVNVYYGYLTNNIATYTNHCTR	Carbamidomethyl(D)@8; Carbamidomethyl(C)@30		0.020947	3824.79	957.205	3824.77	957.2	4	17	1.1.1.2780.2
				fig|1428.368.peg.1765	0.477556	66.67	LPVPEGR			9.32814e-05	766.434	384.224	766.434	384.224	2	6	1.1.1.1548.2
				fig|1428.368.peg.1765	0.419075	99	SPIQEGYKERNMTNQPSEVSGTNAYPGNNNR	Deamidated(N)@14; Deamidated(N)@23; Deamidated(N)@28	missed K-E@8; missed R-N@10	0.034113	3454.57	864.649	3454.53	864.641	4	13	1.1.1.1703.21
				fig|1428.368.peg.1765	0.276544	47.14	MPYFSAR			0.000477263	870.406	436.21	870.406	436.21	2	10	1.1.1.1750.2
				fig|1428.368.peg.1765	0.235077	92.67	IATYTNHCTR	Carbamidomethyl(C)@8	cleaved N-I@N-term	0.00103115	1235.57	412.865	1235.57	412.865	3	11	1.1.1.1402.2
				fig|1428.368.peg.1765	0.226945	96.3	IGNASVLVLSN		cleaved N-W@C-term	-0.00180529	1085.61	543.81	1085.61	543.811	2	12	1.1.1.1929.4
				fig|1428.368.peg.1765	0.217527	82.03	YAAYIGYGWTHVSADENNQIYPN		cleaved N-M@C-term	0.00707914	2645.19	882.737	2645.18	882.735	3	13	1.1.1.2102.4
				fig|1428.368.peg.1765	0.153663	29.83	GFVGNSK			0.00161124	707.362	354.688	707.36	354.687	2	8	1.1.1.1376.2
				fig|1428.368.peg.1765	0.0783135	16.45	SLYGQRNVLR		missed R-N@6	-0.00284639	1204.66	402.562	1204.67	402.563	3	9	1.1.1.1614.2
				fig|1428.368.peg.1765	0.0555173	88.54	SSYNSSSGLPCR	Deamidated(N)@4; Carbamidomethyl(C)@11	cleaved N-S@N-term	-0.00413239	1314.55	658.281	1314.55	658.283	2	11	1.1.1.1584.6
				fig|1428.368.peg.1765	0.047692	98.74	ADDPIFKGR	Formyl(K)@7	missed K-G@7	-0.00241379	1045.52	523.766	1045.52	523.767	2	10	1.1.1.1723.6
				fig|1428.368.peg.1765	0.0329203	66.37	LRPDITLN		cleaved N-H@C-term	-0.000383116	940.534	471.274	940.534	471.274	2	8	1.1.1.1748.5
				fig|1428.368.peg.1765	0.0305841	80.1	WYNTGLQQQY		cleaved Y-N@C-term	0.000509424	1299.59	650.802	1299.59	650.801	2	12	1.1.1.1909.6
				fig|1428.368.peg.1765	0.0254883	38.3	IPYVYHPF		cleaved F-L@C-term	0.000331698	1034.52	518.269	1034.52	518.269	2	11	1.1.1.1948.2
				fig|1428.368.peg.1765	0.0136762	42.31	NIATYTNHCTR	Carbamidomethyl(C)@9	cleaved N-N@N-term	-0.00133346	1349.61	450.878	1349.61	450.879	3	11	1.1.1.1496.3
				fig|1428.368.peg.1765	0.0132283	48.89	HILHAETLVQK		cleaved N-H@N-term	-0.00456946	1287.73	644.87	1287.73	644.872	2	7	1.1.1.1566.24
				fig|1428.368.peg.1765	0.00877392	32.6	TVEIFPETN		cleaved N-H@C-term	0.00117013	1048.51	525.262	1048.51	525.261	2	11	1.1.1.1919.3
				fig|1428.368.peg.1765	0.00480371	18.82	IMPGYER		cleaved N-I@N-term	-0.00139006	864.415	433.215	864.416	433.215	2	6	1.1.1.1565.3
				fig|1428.368.peg.1765	0.00348833	50.79	IQEGYKER		cleaved P-I@N-term; missed K-E@6	-0.0015933	1021.52	511.766	1021.52	511.767	2	8	1.1.1.1478.6
				fig|1428.368.peg.1765	0.00348833	18.94	PLTGEALAR		cleaved N-P@N-term	-0.00233465	926.516	464.265	926.519	464.267	2	10	1.1.1.1614.5
				fig|1428.368.peg.1765	0.00174066	49.44	TVEIFPETNHV		cleaved V-C@C-term	0.000178621	1284.64	643.325	1284.64	643.325	2	11	1.1.1.1883.7
			Cry32Da-like	fig|1428.368.peg.1846	2	99	ASGGTDYQVIK			-0.00503185	1137.56	569.788	1137.57	569.791	2	19	1.1.1.1606.8
				fig|1428.368.peg.1846	2	99	ATFDNLEVIEANPLTGEALAR			0.0028583	2243.15	748.723	2243.14	748.722	3	24	1.1.1.2385.2
				fig|1428.368.peg.1846	2	99	AVQTAQGAIQALFTDSNQNR			0.00135141	2132.06	711.695	2132.06	711.694	3	24	1.1.1.2188.2
				fig|1428.368.peg.1846	2	99	EGSGEGYVTISDGTEDNTETLK			-0.000493652	2301.01	768.011	2301.01	768.012	3	14	1.1.1.1812.10
				fig|1428.368.peg.1846	2	99	ELGTSQGVLELSIER			-0.00315079	1629.85	815.934	1629.86	815.936	2	23	1.1.1.1997.3
				fig|1428.368.peg.1846	2	99	FEPVRDNATTFVDPK	Deamidated(N)@7	missed R-D@5	0.00868426	1735.85	579.624	1735.84	579.621	3	15	1.1.1.1814.6
				fig|1428.368.peg.1846	2	99	GPGSTGGDLVSLPTYAK			-0.00171729	1618.82	810.417	1618.82	810.417	2	29	1.1.1.1887.8
				fig|1428.368.peg.1846	2	99	GQALIGLK			-0.000595386	798.496	400.255	798.496	400.255	2	10	1.1.1.1706.2
				fig|1428.368.peg.1846	2	99	GSTGGDLVSLPTYAK		cleaved P-G@N-term	-0.00482105	1464.74	733.378	1464.75	733.38	2	16	1.1.1.1878.7
				fig|1428.368.peg.1846	2	99	GTTYRSDPAQNTMSAIEAR		missed R-S@5	-0.00292113	2067.96	690.328	2067.96	690.329	3	16	1.1.1.1767.7
				fig|1428.368.peg.1846	2	99	GYETILLPLYAQAANIHLIVLR			0.0124694	2480.43	827.817	2480.42	827.812	3	20	1.1.1.3097.2
				fig|1428.368.peg.1846	2	99	ICIEIGEISGTFK	Carbamidomethyl(C)@2		0.00460279	1465.75	733.884	1465.75	733.882	2	18	1.1.1.2131.2
				fig|1428.368.peg.1846	2	99	IDPFDEPIIIDK			0.00152212	1413.74	707.878	1413.74	707.877	2	20	1.1.1.2106.2
				fig|1428.368.peg.1846	2	99	IDPFDEPIIIDKIEFIPIQGSVETYEADQDLEK		missed K-I@12	0.0158491	3818.92	955.737	3818.9	955.733	4	26	1.1.1.2981.2
				fig|1428.368.peg.1846	2	99	IEFIPIQGSVETYEADQDLEK			0.00143162	2423.18	808.732	2423.17	808.732	3	26	1.1.1.2214.3
				fig|1428.368.peg.1846	2	99	IEIPLTSSAGQLYTIR			-0.000670354	1760.97	881.49	1760.97	881.491	2	23	1.1.1.2118.6
				fig|1428.368.peg.1846	2	99	INDYQIDYK			-0.00336222	1170.55	586.283	1170.56	586.285	2	14	1.1.1.1710.2
				fig|1428.368.peg.1846	2	99	IPYVYNAFLQGALPPVPGETSDIFQQLSSAVAIAR			0.0218565	3731.98	934.002	3731.96	933.996	4	21	1.1.1.3661.2
				fig|1428.368.peg.1846	2	99	IWETNPTPGNTSQLLDAFR			0.00431163	2159.07	720.697	2159.06	720.695	3	26	1.1.1.2288.2
				fig|1428.368.peg.1846	2	99	KEGSGEGYVTISDGTEDNTETLK		missed K-E@1	-0.000566425	2429.11	810.71	2429.11	810.71	3	20	1.1.1.1731.17
				fig|1428.368.peg.1846	2	99	LKPDITLNHILQAETEVQK			0.00567679	2189.21	548.31	2189.21	548.309	4	26	1.1.1.1980.2
				fig|1428.368.peg.1846	2	99	LVECMSDKIYPQEK	Carbamidomethyl(C)@4	missed K-I@8	-0.003542	1738.82	870.419	1738.83	870.421	2	19	1.1.1.1726.13
				fig|1428.368.peg.1846	2	99	MIRPPHLFEWPQTMTFFFEDVNVR			0.0128096	3036.49	760.13	3036.48	760.127	4	23	1.1.1.2953.2
				fig|1428.368.peg.1846	2	99	NEFISSMTIQVLDTVALWPTYDPK			0.0170075	2767.39	923.472	2767.38	923.467	3	22	1.1.1.3798.2
				fig|1428.368.peg.1846	2	99	NLALDHIDRINDYQIDYK	Deamidated(N)@11	missed R-I@9	0.00624438	2219.09	555.78	2219.09	555.779	4	15	1.1.1.1944.2
				fig|1428.368.peg.1846	2	99	NLLNHGDFEFPDWSGENGWK	Deamidated(N)@17		0.00459692	2362.03	788.352	2362.03	788.35	3	23	1.1.1.2308.4
				fig|1428.368.peg.1846	2	99	NNPSNENGSDYGCGCR	Deamidated(N)@7; Carbamidomethyl(C)@13; Carbamidomethyl(C)@15		-0.0124102	1800.63	901.322	1800.64	901.329	2	15	1.1.1.1473.4
				fig|1428.368.peg.1846	2	99	NVLRNGDFMAGLSNWR	Deamidated(N)@5	missed R-N@4	0.00504081	1849.89	617.639	1849.89	617.637	3	23	1.1.1.2116.2
				fig|1428.368.peg.1846	2	99	QASLTNEYTQSQNGFNPSFAGNAR	Gln->pyro-Glu@N-term; Deamidated(N)@13		-0.00299387	2585.14	862.72	2585.14	862.721	3	22	1.1.1.2018.3
				fig|1428.368.peg.1846	2	99	QIGATIFGWTHTSVDPNNTIDTTK	Gln->pyro-Glu@N-term		0.0104813	2599.27	867.429	2599.26	867.426	3	23	1.1.1.2512.2
				fig|1428.368.peg.1846	2	99	QNTFPPIEVPEGTPPPSHR			0.00236324	2099.05	700.689	2099.04	700.688	3	19	1.1.1.1860.9
				fig|1428.368.peg.1846	2	99	SCQDAMPHLDTR	Carbamidomethyl(C)@2		-0.00195326	1429.61	477.543	1429.61	477.543	3	13	1.1.1.1639.13
				fig|1428.368.peg.1846	2	99	SDPAQNTMSAIEAR			-0.00596079	1489.68	745.846	1489.68	745.849	2	14	1.1.1.1770.8
				fig|1428.368.peg.1846	2	99	TFEIFPETNR			-0.000997442	1252.61	627.311	1252.61	627.312	2	13	1.1.1.1946.3
				fig|1428.368.peg.1846	2	99	TLDTNMITALQGLTDEYEYYHIPLDVSTGQK			0.0116817	3528.71	1177.24	3528.7	1177.24	3	18	1.1.1.3062.2
				fig|1428.368.peg.1846	2	99	TSNHVSVMSGNPIFK			0.00409806	1616.8	539.941	1616.8	539.94	3	23	1.1.1.1808.7
				fig|1428.368.peg.1846	2	99	VWESMIGYAQALIK			0.00268567	1607.84	804.928	1607.84	804.926	2	24	1.1.1.2683.2
				fig|1428.368.peg.1846	2	99	YLHMPGADNPQLSDQVYPTYAYQK			0.000545265	2798.3	933.774	2798.3	933.774	3	21	1.1.1.1943.6
				fig|1428.368.peg.1846	2	99	YNQDEFYSGFFGPENSCK	Carbamidomethyl(C)@17		0.0034677	2187.89	730.303	2187.88	730.302	3	21	1.1.1.2100.2
				fig|1428.368.peg.1846	2	99	YRELGTSQGVLELSIER		missed R-E@2	0.00524387	1949.03	650.683	1949.02	650.681	3	22	1.1.1.1928.2
				fig|1428.368.peg.1846	2	99	YTDYDVPSTPYSGGNLTYNAFR			0.00360244	2500.12	834.381	2500.12	834.38	3	22	1.1.1.2042.8
				fig|1428.368.peg.1846	2	99	YTGEEQAGGLIR			-0.00407711	1292.63	647.323	1292.64	647.325	2	19	1.1.1.1694.6
				fig|1428.368.peg.1846	1.95861	99	DLEVFITR			0.00170066	991.536	496.775	991.534	496.774	2	13	1.1.1.1969.2
				fig|1428.368.peg.1846	1.74473	99	FEPVRDNATTFVD		cleaved D-P@C-term; missed R-D@5	0.00134817	1509.71	755.863	1509.71	755.862	2	15	1.1.1.1825.8
				fig|1428.368.peg.1846	1.67778	98.21	TDSYPMTAHSSSLSGYVTK			3.03581e-05	2030.93	677.982	2030.93	677.982	3	11	1.1.1.1763.13
				fig|1428.368.peg.1846	1.55284	97.57	AVNALFTSDAK			-0.00241834	1135.58	568.8	1135.59	568.801	2	10	1.1.1.1776.4
				fig|1428.368.peg.1846	1.49485	99	KAVNALFTSDAK	Deamidated(N)@4	missed K-A@1	0.00157884	1264.67	633.341	1264.67	633.34	2	11	1.1.1.1642.15
				fig|1428.368.peg.1846	1.46852	97.1	FTVGEVATR			-0.00167557	978.512	490.263	978.513	490.264	2	12	1.1.1.1707.2
				fig|1428.368.peg.1846	1.37675	99	PQLSDQVYPTYAYQK		cleaved N-P@N-term	-0.00838359	1799.86	900.94	1799.87	900.944	2	13	1.1.1.1832.18
				fig|1428.368.peg.1846	0.832683	87.25	DVEAWNLR			0.00456109	1001.5	501.756	1001.49	501.754	2	10	1.1.1.1839.3
				fig|1428.368.peg.1846	0.661543	80.85	IFPETNR		cleaved E-I@N-term	-0.00112189	875.449	438.732	875.45	438.732	2	6	1.1.1.1623.6
				fig|1428.368.peg.1846	0.614394	78.58	VESIELIR			0.000999262	957.55	479.783	957.549	479.782	2	11	1.1.1.1812.4
				fig|1428.368.peg.1846	0.501689	92.29	MCLLDQVK	Oxidation(M)@1; Carbamidomethyl(C)@2		0.00205552	1021.5	511.755	1021.49	511.754	2	12	1.1.1.1718.4
				fig|1428.368.peg.1846	0.488117	70.93	NLALDHIDR			0.00221068	1065.56	356.194	1065.56	356.193	3	10	1.1.1.1668.2
				fig|1428.368.peg.1846	0.471083	69.75	EIYTSIR			-0.000706423	880.465	441.24	880.465	441.24	2	8	1.1.1.1641.6
				fig|1428.368.peg.1846	0.367543	61.06	VYTAAVK			-0.00176916	750.426	376.22	750.428	376.221	2	6	1.1.1.1443.3
				fig|1428.368.peg.1846	0.335358	57.79	YTWVGNSWTK			-0.000287722	1240.59	621.301	1240.59	621.301	2	11	1.1.1.1892.7
				fig|1428.368.peg.1846	0.314258	94.74	ALDHIDR		cleaved L-A@N-term	-0.00115514	838.429	420.222	838.43	420.222	2	7	1.1.1.1670.4
				fig|1428.368.peg.1846	0.252588	48.16	VQQTFVK			-0.000196995	848.475	425.245	848.476	425.245	2	9	1.1.1.1524.3
				fig|1428.368.peg.1846	0.199971	74.56	INDYQIDYKNK	Deamidated(N)@10	missed K-N@9	-0.00687244	1413.67	472.231	1413.68	472.233	3	7	1.1.1.1639.12
				fig|1428.368.peg.1846	0.188425	38.97	VYTAAVKTEFTR		missed K-T@7	-0.00369166	1384.73	462.584	1384.74	462.586	3	7	1.1.1.1658.10
				fig|1428.368.peg.1846	0.140261	30.99	LVECMSDK	Carbamidomethyl(C)@4		-0.000568301	980.43	491.222	980.431	491.223	2	6	1.1.1.1505.6
				fig|1428.368.peg.1846	0.109579	25.27	QWFEPR			-0.000138945	861.413	431.714	861.413	431.714	2	6	1.1.1.1768.2
				fig|1428.368.peg.1846	0.101824	23.69	LLYEQR			-0.00430415	820.44	411.227	820.444	411.229	2	9	1.1.1.1572.2
				fig|1428.368.peg.1846	0.0888424	21.13	ELTETVR			-0.00264632	846.442	424.228	846.445	424.23	2	7	1.1.1.1488.6
				fig|1428.368.peg.1846	0.0716041	17.38	DNATTFVDPK			-0.00112704	1106.52	554.269	1106.52	554.269	2	7	1.1.1.1649.7
				fig|1428.368.peg.1846	0.00261362	99	NMANAPLEAYGTNGYTNNPMTNYPSDNAGANAYPGNHNR	Deamidated(N)@22; Carbamidomethyl(S)@25; Deamidated(N)@31		0.00430404	4214.77	1054.7	4214.77	1054.7	4	17	1.1.1.1815.4
			Cry32Eb-like	fig|1428.368.peg.6268	2	99	ALPVVPGETYDIFLQLSDAINIAR			0.0092698	2614.41	872.477	2614.4	872.474	3	21	1.1.1.3664.2
				fig|1428.368.peg.6268	2	99	ALYDQRNALVNGDFSAR	Deamidated(N)@7; Deamidated(N)@11	missed R-N@6	0.00426151	1910.92	637.979	1910.91	637.978	3	19	1.1.1.1845.11
				fig|1428.368.peg.6268	2	99	ATSPVSSNVFPTLR			0.000745369	1474.78	738.397	1474.78	738.396	2	22	1.1.1.1923.4
				fig|1428.368.peg.6268	2	99	DAIQMLFTDSNQNR			-0.0020031	1651.76	826.888	1651.76	826.888	2	19	1.1.1.2094.3
				fig|1428.368.peg.6268	2	99	EAVNTLFLNDALQLK			0.00112591	1687.92	844.965	1687.91	844.965	2	24	1.1.1.2351.2
				fig|1428.368.peg.6268	2	99	EGSGEGYVTISDGTEENTETLK			0.00251626	2315.03	772.684	2315.03	772.684	3	26	1.1.1.1805.13
				fig|1428.368.peg.6268	2	99	FIADEKATSPVSSNVFPTLR		missed K-A@6	0.00558127	2178.14	727.053	2178.13	727.051	3	27	1.1.1.1952.3
				fig|1428.368.peg.6268	2	99	GFVGNSKDLELLVAR		missed K-D@7	0.00328869	1616.89	539.971	1616.89	539.97	3	24	1.1.1.1986.2
				fig|1428.368.peg.6268	2	99	GNAYPGATNMNYQSESFGFTPYSEENSK			-0.0010529	3089.3	1030.77	3089.3	1030.77	3	21	1.1.1.1996.4
				fig|1428.368.peg.6268	2	99	IKGAVQIAR		missed K-G@2	-0.00113068	954.596	478.305	954.597	478.306	2	12	1.1.1.1487.6
				fig|1428.368.peg.6268	2	99	IPYVYNQFLQR			-0.000680657	1439.76	720.885	1439.76	720.885	2	19	1.1.1.2011.3
				fig|1428.368.peg.6268	2	99	ISNHVYVTSDN		cleaved N-P@C-term	0.00305106	1247.58	624.798	1247.58	624.796	2	12	1.1.1.1553.6
				fig|1428.368.peg.6268	2	99	ISNHVYVTSDNPIFK			0.00201496	1732.88	867.447	1732.88	867.446	2	16	1.1.1.1818.13
				fig|1428.368.peg.6268	2	99	KEGSGEGYVTISDGTEENTETLK		missed K-E@1	0.00097489	2443.12	815.382	2443.12	815.382	3	17	1.1.1.1726.12
				fig|1428.368.peg.6268	2	99	LDHVEVVEVGPLTGDALTR			0.00403386	2019.07	505.774	2019.06	505.773	4	15	1.1.1.1892.3
				fig|1428.368.peg.6268	2	99	LVECISDPIHTK	Carbamidomethyl(C)@4		-0.0039535	1410.71	706.364	1410.72	706.366	2	17	1.1.1.1725.14
				fig|1428.368.peg.6268	2	99	MCLLEQVK	Oxidation(M)@1; Carbamidomethyl(C)@2		-0.00338668	1035.51	518.76	1035.51	518.762	2	11	1.1.1.1705.8
				fig|1428.368.peg.6268	2	99	MGAYPDKINMPVNQGLDCR	Deamidated(N)@13; Carbamidomethyl(C)@18	missed K-I@7	0.00727125	2178.99	727.338	2178.99	727.336	3	20	1.1.1.1869.6
				fig|1428.368.peg.6268	2	99	NALVNGDFSAR	Deamidated(N)@5		-0.000855313	1163.56	582.785	1163.56	582.786	2	15	1.1.1.1759.8
				fig|1428.368.peg.6268	2	99	NLLHHGDFESPDWSGENR			0.00351167	2108.93	528.241	2108.93	528.24	4	19	1.1.1.1792.6
				fig|1428.368.peg.6268	2	99	NMQMPEAYGTSEYASNQNIMNYPSESYR			0.00818449	3274.37	1092.46	3274.36	1092.46	3	20	1.1.1.2005.5
				fig|1428.368.peg.6268	2	99	QILEAETWVQK	Gln->pyro-Glu@N-term		-0.00296203	1326.68	664.347	1326.68	664.348	2	18	1.1.1.2234.3
				fig|1428.368.peg.6268	2	99	VTDYQVDQAAK			-0.00238761	1236.6	619.305	1236.6	619.307	2	18	1.1.1.1539.4
				fig|1428.368.peg.6268	2	99	YLNMPNANTPQFSDK			-4.30006e-05	1738.8	870.407	1738.8	870.406	2	18	1.1.1.1840.7
				fig|1428.368.peg.6268	1.85387	99	LQSAITLK			-0.0013149	872.532	437.273	872.533	437.274	2	12	1.1.1.1670.6
				fig|1428.368.peg.6268	1.67778	98.55	GAVQIAR			-0.000870061	713.418	357.716	713.418	357.716	2	11	1.1.1.1454.2
				fig|1428.368.peg.6268	1.42022	99	SKDLELLVAR		cleaved N-S@N-term; missed K-D@2	3.12067e-07	1142.67	381.896	1142.67	381.896	3	12	1.1.1.1780.3
				fig|1428.368.peg.6268	1.38722	97.22	DLELLVAR			-0.000351875	927.539	464.777	927.539	464.777	2	12	1.1.1.1956.2
				fig|1428.368.peg.6268	1.11351	99	ISNHVYVTSDNPIFKGR	Formyl(K)@15	missed K-G@15	0.00150609	1974	659.006	1974	659.006	3	16	1.1.1.1846.10
				fig|1428.368.peg.6268	1.06048	93.94	MNQDVTR			0.00427533	862.401	432.208	862.397	432.206	2	9	1.1.1.1334.2
				fig|1428.368.peg.6268	0.514279	77.04	MSYASNHYK			0.00131324	1099.48	367.5	1099.48	367.499	3	9	1.1.1.1442.3
				fig|1428.368.peg.6268	0.241088	52.36	NLLHHGDFESPDWSGENRWK		missed R-W@18	0.00653289	2423.11	606.785	2423.1	606.783	4	10	1.1.1.1832.8
				fig|1428.368.peg.6268	0.0809219	23.3	IGTTDGMAK			-0.00229987	892.43	447.222	892.432	447.223	2	9	1.1.1.1439.3
				fig|1428.368.peg.6268	0.0186345	56	KEGSGEGYVTISDGTEEN		cleaved N-T@C-term; missed K-E@1	-0.0103673	1870.8	936.405	1870.81	936.411	2	10	1.1.1.1688.15
				fig|1428.368.peg.6268	0.00348833	85.89	LVECISDPIHTKEK	Carbamidomethyl(C)@4; Formyl(K)@14	missed K-E@12	0.00499717	1695.86	566.292	1695.85	566.291	3	10	1.1.1.1748.13
			Cry73Aa-like	fig|1428.368.peg.6270	2	99	ALELYQEAAADWNMNPNDADAKER		missed K-E@22	0.000687362	2734.23	912.417	2734.23	912.417	3	24	1.1.1.2049.3
				fig|1428.368.peg.6270	2	99	CNHNEYEILDSGNVSCQPK	Carbamidomethyl(C)@1; Carbamidomethyl(C)@16	cleaved N-C@N-term	-0.000189876	2262.96	755.328	2262.96	755.328	3	23	1.1.1.1750.4
				fig|1428.368.peg.6270	2	99	DMTLMVLDIVAVWPTYNPR			0.0105255	2233.14	745.387	2233.13	745.383	3	21	1.1.1.3960.2
				fig|1428.368.peg.6270	2	99	FGAGWGLPSTEVEDNYTR			0.00103886	1997.91	666.978	1997.91	666.978	3	25	1.1.1.2039.2
				fig|1428.368.peg.6270	2	99	FGTDPQAQWK			-0.00144831	1176.55	589.285	1176.56	589.285	2	17	1.1.1.1720.10
				fig|1428.368.peg.6270	2	99	GPGSTGGDLIQLASGYLQY		cleaved Y-S@C-term	0.00180305	1895.93	948.971	1895.93	948.971	2	17	1.1.1.2967.2
				fig|1428.368.peg.6270	2	99	GPGSTGGDLIQLASGYLQYSFPSTDNR			0.0107314	2800.34	934.454	2800.33	934.451	3	24	1.1.1.2969.2
				fig|1428.368.peg.6270	2	99	GWTNNSSVDAIESTLVR			-0.00164654	1847.9	924.957	1847.9	924.958	2	26	1.1.1.2119.9
				fig|1428.368.peg.6270	2	99	ITNTLHYVGSSTTWEQSFSATPIGSIK			0.00058531	2924.46	975.826	2924.46	975.826	3	25	1.1.1.2114.6
				fig|1428.368.peg.6270	2	99	IYNNPYGVQIQLSR			-0.00023055	1663.87	832.941	1663.87	832.941	2	21	1.1.1.1922.5
				fig|1428.368.peg.6270	2	99	KITNTLHYVGSSTTWEQSFSATPIGSIK		missed K-I@1	0.0106217	3052.56	764.148	3052.55	764.145	4	25	1.1.1.2039.3
				fig|1428.368.peg.6270	2	99	MNQNCNHNEYEILDSGNVSCQPK	Carbamidomethyl(C)@5; Carbamidomethyl(C)@20		0.00112724	2750.15	917.724	2750.15	917.723	3	17	1.1.1.1762.22
				fig|1428.368.peg.6270	2	99	NLYEAETVPIAFR			0.000130745	1521.78	761.899	1521.78	761.899	2	19	1.1.1.2019.3
				fig|1428.368.peg.6270	2	99	NLYEAETVPIAFRK		missed R-K@13	-6.76415e-05	1649.88	825.946	1649.88	825.946	2	17	1.1.1.1890.12
				fig|1428.368.peg.6270	2	99	NNQHITTVGYSGGWWNGIPK			0.00411168	2228.08	743.701	2228.08	743.699	3	25	1.1.1.1987.3
				fig|1428.368.peg.6270	2	99	NQNCNHNEYEILDSGNVSCQPK	Carbamidomethyl(C)@4; Carbamidomethyl(C)@19	cleaved M-N@N-term	0.00270438	2619.11	874.044	2619.11	874.043	3	20	1.1.1.1747.22
				fig|1428.368.peg.6270	2	99	PTDYNKYPYLDPYSKDPIYGK		cleaved N-P@N-term; missed K-Y@6; missed K-D@15	0.00471729	2536.22	635.062	2536.22	635.061	4	22	1.1.1.1885.6
				fig|1428.368.peg.6270	2	99	QAYDLAPNPTDYNK			-0.00115786	1608.74	805.378	1608.74	805.378	2	14	1.1.1.1774.20
				fig|1428.368.peg.6270	2	99	QAYDLAPNPTDYNKYPYLDPYSK		missed K-Y@14	-0.00128755	2735.27	912.765	2735.28	912.766	3	18	1.1.1.2006.3
				fig|1428.368.peg.6270	2	99	QAYDLAPNPTDYNKYPYLDPYSKDPIYGK		missed K-Y@14; missed K-D@23	0.00696902	3408.63	853.164	3408.62	853.162	4	22	1.1.1.2016.2
				fig|1428.368.peg.6270	2	99	QFMDAVEYLVSQK	Gln->pyro-Glu@N-term		0.00199763	1539.73	770.872	1539.73	770.871	2	20	1.1.1.3311.2
				fig|1428.368.peg.6270	2	99	QFTSTNTVIEYAMPSFR	Gln->pyro-Glu@N-term		0.00404185	1973.92	987.969	1973.92	987.967	2	24	1.1.1.2745.4
				fig|1428.368.peg.6270	2	99	RQFTSTNTVIEYAMPSFR		missed R-Q@1	0.00104938	2147.05	716.69	2147.05	716.69	3	25	1.1.1.2023.3
				fig|1428.368.peg.6270	2	99	SEAVSRLEGVQR		missed R-L@6	-0.000196728	1329.7	444.241	1329.7	444.241	3	11	1.1.1.1550.10
				fig|1428.368.peg.6270	2	99	SLTSTNTIATDK		cleaved N-S@N-term	-0.00205885	1250.63	626.324	1250.64	626.325	2	11	1.1.1.1565.9
				fig|1428.368.peg.6270	2	99	SPHLVTELTK			0.00115087	1123.62	375.549	1123.62	375.549	3	14	1.1.1.1658.2
				fig|1428.368.peg.6270	2	99	SSVDAIESTLVR		cleaved N-S@N-term	0.00175563	1275.67	638.842	1275.67	638.841	2	17	1.1.1.1903.2
				fig|1428.368.peg.6270	2	99	TAEYTNHCTNTYDK	Carbamidomethyl(C)@8		-0.00121082	1716.7	573.242	1716.7	573.242	3	17	1.1.1.1448.7
				fig|1428.368.peg.6270	2	99	TVHNVSATDIGNLSLSLGAIPFGFSFYNK			0.0150883	3068.58	1023.87	3068.56	1023.86	3	28	1.1.1.2940.3
				fig|1428.368.peg.6270	2	99	VGGFEVPLLTTFAQAANLHLLLLR			0.0103282	2592.49	865.17	2592.48	865.167	3	22	1.1.1.3626.2
				fig|1428.368.peg.6270	2	99	YASTNGSTLTLK	Deamidated(N)@5		-0.00231411	1255.63	628.821	1255.63	628.822	2	16	1.1.1.1684.18
				fig|1428.368.peg.6270	2	99	YASTNGSTLTLKK	Deamidated(N)@5	missed K-K@12	-0.000250842	1383.72	462.249	1383.72	462.249	3	20	1.1.1.1579.2
				fig|1428.368.peg.6270	2	99	YPLAQAPGFELPSMNYQGVMNTSIGR			0.00774738	2840.37	947.797	2840.36	947.795	3	26	1.1.1.2472.2
				fig|1428.368.peg.6270	2	99	YPYLDPYSKDPIYGK		missed K-D@9	0.00487751	1817.89	909.953	1817.89	909.951	2	16	1.1.1.1901.7
				fig|1428.368.peg.6270	2	99	YYTAPVDWNLFNDFR			0.00342999	1919.89	960.951	1919.88	960.949	2	20	1.1.1.2741.2
				fig|1428.368.peg.6270	2	99	YYTAPVDWNLFNDFRR		missed R-R@15	0.00603082	2075.99	693.004	2075.99	693.002	3	14	1.1.1.2376.2
				fig|1428.368.peg.6270	1.72125	98.48	EVYSTVYGR			-0.000694849	1072.52	537.266	1072.52	537.267	2	10	1.1.1.1640.16
				fig|1428.368.peg.6270	1.3279	99	HLVTELTK		cleaved P-H@N-term	-0.00292112	939.536	470.775	939.539	470.777	2	10	1.1.1.1546.6
				fig|1428.368.peg.6270	0.906578	89.87	TTQIPAVK			-0.000532278	856.501	429.258	856.502	429.258	2	11	1.1.1.1553.4
				fig|1428.368.peg.6270	0.692504	83.13	RFGTDPQAQWK		missed R-F@1	-0.00214487	1332.66	667.335	1332.66	667.336	2	8	1.1.1.1650.17
				fig|1428.368.peg.6270	0.640165	97.88	PYSKDPIYGK		cleaved D-P@N-term; missed K-D@4	-0.00154299	1166.6	389.873	1166.6	389.873	3	10	1.1.1.1528.4
				fig|1428.368.peg.6270	0.632644	80.45	LEGVQR			-0.00042771	700.386	351.2	700.387	351.201	2	7	1.1.1.1381.2
				fig|1428.368.peg.6270	0.463442	96.12	TVIEYAMPSFR		cleaved N-T@N-term	-0.00104188	1312.65	657.331	1312.65	657.332	2	13	1.1.1.1996.2
				fig|1428.368.peg.6270	0.28735	97.32	NNQHITTVGY		cleaved Y-S@C-term	-0.00438778	1145.54	573.778	1145.55	573.781	2	10	1.1.1.1623.15
				fig|1428.368.peg.6270	0.185087	86.84	TFAIFDTGR		cleaved N-T@N-term	-0.000194704	1026.51	514.264	1026.51	514.264	2	12	1.1.1.1954.2
				fig|1428.368.peg.6270	0.172631	96.86	NTFAIFDTGR		cleaved Y-N@N-term	0.00331653	1140.56	571.287	1140.56	571.285	2	13	1.1.1.1967.2
				fig|1428.368.peg.6270	0.134896	31.27	LTFDER			-0.000946631	779.38	390.697	779.381	390.698	2	7	1.1.1.1625.7
				fig|1428.368.peg.6270	0.069051	94.36	TVHNVSATDIGN		cleaved N-L@C-term	-0.0155381	1226.57	614.294	1226.59	614.302	2	10	1.1.1.1552.11
				fig|1428.368.peg.6270	0.0282604	68.82	PYGVQIQLSR		cleaved N-P@N-term	-0.00137418	1159.63	580.824	1159.64	580.825	2	9	1.1.1.1857.2
				fig|1428.368.peg.6270	0.0145735	97.01	ALELYQEAAADWNMNPNDADAK	Carbamidomethyl(D)@11		0.00793016	2506.12	836.379	2506.11	836.376	3	15	1.1.1.1964.4
		3	Cry45Aa-like_1	fig|1428.368.peg.6440	2	99	GVTPNPTSQPIVR			-0.000498593	1364.74	683.378	1364.74	683.378	2	19	1.1.1.1665.8
				fig|1428.368.peg.6440	2	99	ILHEMGYTDSTHIYVAHFIGSGK			0.00706815	2575.26	644.822	2575.25	644.82	4	32	1.1.1.1995.2
				fig|1428.368.peg.6440	2	99	LYNLNVQVPDPIVTDNPTNSAVAR			0.00080893	2609.35	870.789	2609.34	870.789	3	27	1.1.1.2491.2
				fig|1428.368.peg.6440	2	99	MGLQSYVNVVETPLPGR			-0.00547705	1858.96	930.485	1858.96	930.488	2	24	1.1.1.2473.4
				fig|1428.368.peg.6440	2	99	RSGLDIPIFDPIVSR		missed R-S@1	0.00208991	1683.93	562.318	1683.93	562.318	3	17	1.1.1.2637.2
				fig|1428.368.peg.6440	2	99	RSGLDIPIFDPIVSRQ		missed R-S@1; missed R-Q@15	0.00150006	1811.99	605.004	1811.99	605.004	3	24	1.1.1.2613.2
				fig|1428.368.peg.6440	2	99	SEAGFLFAK			0.00321942	968.5	485.257	968.497	485.256	2	14	1.1.1.1935.2
				fig|1428.368.peg.6440	2	99	SGLDIPIFDPIVSR			0.00114787	1527.83	764.923	1527.83	764.922	2	22	1.1.1.3172.2
				fig|1428.368.peg.6440	2	99	SGLDIPIFDPIVSRQ		missed R-Q@14	-0.00052771	1655.89	828.951	1655.89	828.951	2	21	1.1.1.3064.3
				fig|1428.368.peg.6440	2	99	TFIVQTGPFDK		cleaved H-T@N-term	-0.00160026	1251.65	626.831	1251.65	626.832	2	17	1.1.1.1990.2
				fig|1428.368.peg.6440	2	99	YVNHSMAR			-0.00343618	976.451	489.233	976.455	489.235	2	11	1.1.1.1362.3
				fig|1428.368.peg.6440	1.82391	99	VPDPIVTDN		cleaved Q-V@N-term; cleaved N-P@C-term	0.000287328	968.482	485.248	968.482	485.248	2	11	1.1.1.1735.3
				fig|1428.368.peg.6440	1.76955	99	PIVTDNPTNSAVAR		cleaved D-P@N-term	-0.00393788	1453.75	727.881	1453.75	727.884	2	13	1.1.1.1618.19
				fig|1428.368.peg.6440	0.896196	98.78	VPDPIVTDNPTN		cleaved Q-V@N-term; cleaved N-S@C-term	0.00110919	1280.63	641.32	1280.62	641.32	2	13	1.1.1.1783.11
				fig|1428.368.peg.6440	0.58336	81.3	AILDLKK		cleaved M-A@N-term; missed K-K@6	-0.0016892	799.515	400.765	799.517	400.766	2	11	1.1.1.1604.2
				fig|1428.368.peg.6440	0.38405	68.51	KLTEDYWR		missed K-L@1	0.000834488	1109.55	370.858	1109.55	370.857	3	11	1.1.1.1680.2
				fig|1428.368.peg.6440	0.119758	32.76	AGQTREYQIPVTR		missed R-E@5	-0.00604012	1517.79	759.902	1517.8	759.905	2	10	1.1.1.1631.15
				fig|1428.368.peg.6440	0.0181814	47.23	IVQTGPFDK		cleaved F-I@N-term	0.00025754	1003.53	502.774	1003.53	502.774	2	8	1.1.1.1641.16
				fig|1428.368.peg.6440	0.0123337	23.76	EYQIPVTR	Glu->pyro-Glu@N-term		-0.00263757	986.516	494.265	986.519	494.267	2	10	1.1.1.1692.3
				fig|1428.368.peg.6440	0.00788851	38.77	TPNPTSQPIVR		cleaved V-T@N-term	0.00358763	1208.65	605.335	1208.65	605.333	2	9	1.1.1.1591.15
				fig|1428.368.peg.6440	0.00217692	50.48	LTEDYWR			-0.00319368	981.452	982.46	981.456	982.463	1	11	1.1.1.1756.10
			Cry45Aa-like_2	fig|1428.368.peg.5334	2	99	DPGNIYNYNMK			-0.000709058	1327.59	664.8	1327.59	664.801	2	19	1.1.1.1757.5
				fig|1428.368.peg.5334	2	99	GTTPNPTSQPIVR			-0.00518239	1366.72	684.365	1366.72	684.367	2	11	1.1.1.1610.22
				fig|1428.368.peg.5334	2	99	MGLQSFVNVVERPLLGR			0.000947784	1914.05	639.025	1914.05	639.024	3	19	1.1.1.2814.2
				fig|1428.368.peg.5334	2	99	PIVTDNPTNSAYAK	Deamidated(N)@9	cleaved D-P@N-term	-0.00265811	1490.72	746.369	1490.73	746.37	2	23	1.1.1.1646.10
				fig|1428.368.peg.5334	2	99	QHNTTLKSSGYLGR		missed K-S@7	0.00167714	1560.8	521.275	1560.8	521.274	3	17	1.1.1.1523.4
				fig|1428.368.peg.5334	2	99	SEAGLLFAK			-0.00222966	934.51	468.262	934.512	468.263	2	14	1.1.1.1824.2
				fig|1428.368.peg.5334	2	99	SSGYLGRDPGNIYNYNMK		missed R-D@7	0.0034803	2047.95	683.656	2047.94	683.655	3	22	1.1.1.1818.8
				fig|1428.368.peg.5334	2	99	VPDPIVTDNPTNSAYAK			-0.000836306	1800.89	901.452	1800.89	901.452	2	25	1.1.1.1803.6
				fig|1428.368.peg.5334	2	99	YNPNPYTAHFTGSGK			-0.00255313	1652.76	551.926	1652.76	551.927	3	18	1.1.1.1711.4
				fig|1428.368.peg.5334	1.92082	99	SGLDIPIFDPVISR			0.001392	1527.83	764.923	1527.83	764.922	2	22	1.1.1.3113.2
				fig|1428.368.peg.5334	1.52288	98.27	EYQIPVTGR			-0.00239032	1061.55	531.781	1061.55	531.783	2	13	1.1.1.1701.15
				fig|1428.368.peg.5334	0.946922	93.35	AIIDLLK		cleaved M-A@N-term	0.0015749	784.507	393.261	784.506	393.26	2	11	1.1.1.2190.2
				fig|1428.368.peg.5334	0.882729	99	PGNIYNYNMK		cleaved D-P@N-term	-0.00448401	1212.56	607.285	1212.56	607.287	2	14	1.1.1.1698.4
				fig|1428.368.peg.5334	0.170696	46.24	SSGYLGR			-0.000313446	738.366	370.19	738.366	370.19	2	6	1.1.1.1487.3
			Cry45Aa-like_3	fig|1428.368.peg.6442	2	99	GLDIPIFDPVVSR			-0.0024106	1426.78	714.397	1426.78	714.398	2	21	1.1.1.2958.2
				fig|1428.368.peg.6442	2	99	GLDIPIFDPVVSRQ		missed R-Q@13	-0.00356424	1554.84	778.426	1554.84	778.428	2	22	1.1.1.2897.2
				fig|1428.368.peg.6442	2	99	GYTPNPTSQPIVR			-0.00318258	1428.73	715.374	1428.74	715.375	2	19	1.1.1.1705.2
				fig|1428.368.peg.6442	2	99	KYQIPLTGR		missed K-Y@1	0.000215572	1074.62	538.317	1074.62	538.317	2	15	1.1.1.1673.6
				fig|1428.368.peg.6442	2	99	MGLQSYVDVVETPLSGR			-0.00401573	1849.92	925.967	1849.92	925.969	2	22	1.1.1.2688.2
				fig|1428.368.peg.6442	2	99	MTGYNGGVISEILDMQGVANITYPQFGIAHFTGSGK	Deamidated(N)@5		0.00654701	3773.81	944.461	3773.81	944.459	4	28	1.1.1.3931.2
				fig|1428.368.peg.6442	2	99	NVVLECDITGTTTCVYR	Carbamidomethyl(C)@6; Carbamidomethyl(C)@14		-0.00653783	1999.93	1000.97	1999.93	1000.97	2	22	1.1.1.1997.4
				fig|1428.368.peg.6442	2	99	PVVIDNPTNSALAR		cleaved D-P@N-term	-0.00229319	1465.79	733.901	1465.79	733.902	2	21	1.1.1.1770.9
				fig|1428.368.peg.6442	2	99	SEAGFVFAK			0.000861305	954.482	478.248	954.481	478.248	2	14	1.1.1.1790.4
				fig|1428.368.peg.6442	2	99	TITFNETQSDSQSTTTEHGITAGVSATVK			0.00219903	3010.44	1004.49	3010.44	1004.49	3	23	1.1.1.1842.4
				fig|1428.368.peg.6442	1.36653	97.35	YQIPLTGR			-0.00159228	946.522	474.268	946.524	474.269	2	12	1.1.1.1769.5
				fig|1428.368.peg.6442	1.30103	99	YPGNSVDR	Deamidated(N)@4		-0.000242561	907.403	454.709	907.404	454.709	2	9	1.1.1.1486.7
				fig|1428.368.peg.6442	0.853872	91.07	KYQIPLTGRR		missed K-Y@1; missed R-R@9	-0.00245348	1230.72	616.366	1230.72	616.367	2	10	1.1.1.1586.11
				fig|1428.368.peg.6442	0.0501223	85.77	YTTSNTYTTETSR		cleaved N-Y@N-term	-0.00384372	1523.67	762.842	1523.67	762.844	2	10	1.1.1.1545.20
			Cry32Ea-like	fig|1428.368.peg.1765	2	99	AIAEQAR			-0.0018992	757.406	379.71	757.408	379.711	2	10	1.1.1.1332.2
				fig|1428.368.peg.1765	2	99	AQAITELQGIQAAIR			-0.000236316	1581.88	791.949	1581.88	791.949	2	26	1.1.1.2307.3
				fig|1428.368.peg.1765	2	99	AVNALFKSDAK		missed K-S@7	-5.75124e-05	1162.63	582.325	1162.63	582.325	2	11	1.1.1.1640.22
				fig|1428.368.peg.1765	2	99	AVQAAQSAIQALFTDQNQTR			0.0030399	2160.1	721.039	2160.09	721.038	3	27	1.1.1.2590.2
				fig|1428.368.peg.1765	2	99	DAACNWEKNPNNPQLK	Carbamidomethyl(C)@4	missed K-N@8	0.00797528	1897.88	633.635	1897.87	633.632	3	23	1.1.1.1654.20
				fig|1428.368.peg.1765	2	99	DAACNWEKNPNNPQLKETVR	Carbamidomethyl(C)@4	missed K-N@8; missed K-E@16	-0.00130336	2383.13	596.79	2383.13	596.791	4	21	1.1.1.1672.7
				fig|1428.368.peg.1765	2	99	DLIIDGGYQGER			-0.0019304	1334.64	668.33	1334.65	668.331	2	16	1.1.1.1837.5
				fig|1428.368.peg.1765	2	99	EGAGEGYVTISDGTEDNTETVK			0.001923	2271	758.009	2271	758.008	3	17	1.1.1.1734.21
				fig|1428.368.peg.1765	2	99	ETLPVTLPVGSEDR			-0.00161672	1511.78	756.898	1511.78	756.899	2	21	1.1.1.2004.2
				fig|1428.368.peg.1765	2	99	ETLPVTLPVGSEDRYLPVGNVWHVTNQLFSSGGASVVTGWLFR		missed R-Y@14	0.0274342	4684.43	1172.12	4684.41	1172.11	4	24	1.1.1.4195.2
				fig|1428.368.peg.1765	2	99	FTAGVETPR			-0.00215795	976.496	489.255	976.498	489.256	2	15	1.1.1.1602.3
				fig|1428.368.peg.1765	2	99	GFVGNSKELEVFVQR	Deamidated(N)@5	missed K-E@7	0.00114076	1708.88	570.634	1708.88	570.633	3	25	1.1.1.2304.2
				fig|1428.368.peg.1765	2	99	GMEPDLLSAIPVFWDIN		cleaved N-S@C-term	0.0136818	1915.95	958.984	1915.94	958.977	2	16	1.1.1.4857.2
				fig|1428.368.peg.1765	2	99	GMEPDLLSAIPVFWDINSSYN		cleaved N-S@C-term	0.0106482	2367.12	790.047	2367.11	790.044	3	17	1.1.1.4824.2
				fig|1428.368.peg.1765	2	99	GMEPDLLSAIPVFWDINSSYNSSSGLPCR	Carbamidomethyl(C)@28		0.00305049	3211.5	1071.51	3211.5	1071.51	3	23	1.1.1.4254.2
				fig|1428.368.peg.1765	2	99	GPGSTGGDLVK			-0.00355553	986.5	494.257	986.503	494.259	2	15	1.1.1.1520.3
				fig|1428.368.peg.1765	2	99	GPGSTGGDLVKLPVPEGR		missed K-L@11	0.00300244	1734.93	579.317	1734.93	579.316	3	25	1.1.1.1830.3
				fig|1428.368.peg.1765	2	99	GSETSLLTAYVEAATLHLGLLK			0.000940514	2286.25	763.09	2286.25	763.09	3	24	1.1.1.3967.3
				fig|1428.368.peg.1765	2	99	GYITYGNASVVK	Deamidated(N)@7		-0.00135589	1271.64	636.827	1271.64	636.827	2	20	1.1.1.1769.9
				fig|1428.368.peg.1765	2	99	GYITYGNASVVKGPGSTGGDLVK		missed K-G@12	0.00629968	2239.15	747.392	2239.15	747.39	3	19	1.1.1.1818.9
				fig|1428.368.peg.1765	2	99	IDESKLKPYTR		missed K-L@5	-0.000722066	1348.73	450.585	1348.74	450.586	3	15	1.1.1.1551.3
				fig|1428.368.peg.1765	2	99	IEFIPIEGTLEEYQANQDLEK			0.00218518	2478.22	827.08	2478.22	827.079	3	24	1.1.1.3000.2
				fig|1428.368.peg.1765	2	99	IGTTDGVANIDNLEVIEANPLTGEALAR			0.00445719	2865.48	956.166	2865.47	956.165	3	23	1.1.1.3063.4
				fig|1428.368.peg.1765	2	99	IHIYNEGGGDLILDK			0.00619482	1655.86	552.96	1655.85	552.958	3	24	1.1.1.1874.2
				fig|1428.368.peg.1765	2	99	IHIYNEGGGDLILDKIEFIPIEGTLEEYQANQDLEK		missed K-I@15	0.0135372	4116.07	1030.03	4116.06	1030.02	4	30	1.1.1.3385.2
				fig|1428.368.peg.1765	2	99	IPYVYHPFLQGSLPAVPGETYDIFQQLSNAIGK			0.00379179	3661.89	1221.64	3661.88	1221.63	3	21	1.1.1.4040.2
				fig|1428.368.peg.1765	2	99	KAVNALFK		missed K-A@1	-0.000596949	889.538	445.776	889.539	445.777	2	9	1.1.1.1590.7
				fig|1428.368.peg.1765	2	99	KAVNALFKSDAK		missed K-A@1; missed K-S@8	-0.00245608	1290.73	646.371	1290.73	646.372	2	11	1.1.1.1555.15
				fig|1428.368.peg.1765	2	99	KEGAGEGYVTISDGTEDN		cleaved N-T@C-term; missed K-E@1	0.000587971	1840.8	921.406	1840.8	921.405	2	20	1.1.1.1697.11
				fig|1428.368.peg.1765	2	99	KEGAGEGYVTISDGTEDNTETVK		missed K-E@1	-0.00348463	2399.09	1200.55	2399.1	1200.56	2	24	1.1.1.1697.12
				fig|1428.368.peg.1765	2	99	KETLPVTLPVGSEDR		missed K-E@1	0.000947975	1639.88	547.634	1639.88	547.633	3	21	1.1.1.1825.3
				fig|1428.368.peg.1765	2	99	LESIELIR			-0.000841959	971.564	486.789	971.565	486.79	2	13	1.1.1.1967.2
				fig|1428.368.peg.1765	2	99	LRPDITLNHILHAETLVQK			0.00715618	2210.26	553.572	2210.25	553.571	4	29	1.1.1.2225.2
				fig|1428.368.peg.1765	2	99	LSYVGLGMLNSDYR			-0.001132	1586.78	794.395	1586.78	794.395	2	24	1.1.1.2437.2
				fig|1428.368.peg.1765	2	99	LSYVGLGMLNSDYRDFVSSPTR		missed R-D@14	0.00247652	2476.21	826.41	2476.21	826.409	3	22	1.1.1.2721.2
				fig|1428.368.peg.1765	2	99	LTQSDMR			-0.00040601	849.401	425.708	849.401	425.708	2	10	1.1.1.1428.3
				fig|1428.368.peg.1765	2	99	LVECMSDEIYPQEK	Carbamidomethyl(C)@4		0.000991462	1739.78	870.895	1739.77	870.895	2	18	1.1.1.1803.5
				fig|1428.368.peg.1765	2	99	LYEVPTKSQLTR		missed K-S@7	0.00085577	1433.79	478.937	1433.79	478.937	3	15	1.1.1.1667.8
				fig|1428.368.peg.1765	2	99	MDQYYNNNEYEILDHGR	Deamidated(N)@6		0.00243283	2173.9	725.642	2173.9	725.641	3	22	1.1.1.1876.2
				fig|1428.368.peg.1765	2	99	MDQYYNNNEYEILDHGRR	Oxidation(M)@1; Dehydrated(D)@2; Deamidated(N)@6	missed R-R@17	0.00812079	2327.99	583.006	2327.99	583.004	4	20	1.1.1.1778.4
				fig|1428.368.peg.1765	2	99	MDSYVSTSLMTAQNGSPLSGYVTK	Deamidated(N)@14		0.00451359	2537.17	846.731	2537.17	846.729	3	22	1.1.1.2457.2
				fig|1428.368.peg.1765	2	99	MMTAAEQITNK			-0.00327674	1236.58	413.201	1236.58	413.202	3	16	1.1.1.1642.4
				fig|1428.368.peg.1765	2	99	NGDFSAGLSNWQGAEGALVQK	Deamidated(N)@1		-0.00313533	2149.01	1075.51	2149.01	1075.51	2	23	1.1.1.2473.6
				fig|1428.368.peg.1765	2	99	NLGIWVGFK		cleaved Q-N@N-term	-0.00134113	1032.57	517.294	1032.58	517.295	2	15	1.1.1.2476.2
				fig|1428.368.peg.1765	2	99	NMNVPYGIPPTNPCDRDYQR	Carbamidomethyl(C)@14	missed R-D@16	0.00391514	2406.09	803.037	2406.08	803.035	3	15	1.1.1.1832.8
				fig|1428.368.peg.1765	2	99	NMTMAVLDIVAVWPTFDIK			0.00997152	2163.12	722.048	2163.11	722.044	3	24	1.1.1.4547.2
				fig|1428.368.peg.1765	2	99	NMTNQPSEVSGTNAYPGNNNR			-0.00376118	2263.98	755.669	2263.99	755.67	3	17	1.1.1.1616.9
				fig|1428.368.peg.1765	2	99	NTLQLNVTDYLVDQAAK			-0.00185202	1904.98	953.499	1904.98	953.499	2	21	1.1.1.2636.4
				fig|1428.368.peg.1765	2	99	NVLRNGDFSAGLSNWQGAEGALVQK	Deamidated(N)@5	missed R-N@4	-0.00017162	2631.3	878.109	2631.3	878.109	3	30	1.1.1.2367.2
				fig|1428.368.peg.1765	2	99	PGTPQAQISWDK		cleaved D-P@N-term	-0.00258682	1326.65	664.334	1326.66	664.336	2	19	1.1.1.1743.3
				fig|1428.368.peg.1765	2	99	PVFWDINSSYNSSSGLPCR	Carbamidomethyl(C)@18	cleaved I-P@N-term	-5.97146	2179.02	1090.52	2184.99	1093.5	2	23	1.1.1.3637.2
				fig|1428.368.peg.1765	2	99	SPIQEGYK			-0.00177375	920.459	461.237	920.46	461.237	2	9	1.1.1.1514.9
				fig|1428.368.peg.1765	2	99	SPIQEGYKER		missed K-E@8	0.00206727	1205.61	402.876	1205.6	402.875	3	16	1.1.1.1489.6
				fig|1428.368.peg.1765	2	99	SPIQEGYKERNMTNQPSEVSGTNAYPGNNNR	Deamidated(N)@30	missed K-E@8; missed R-N@10	0.0050778	3452.57	864.15	3452.57	864.149	4	21	1.1.1.1671.25
				fig|1428.368.peg.1765	2	99	SSYNSSSGLPCR	Carbamidomethyl(C)@11	cleaved N-S@N-term	-0.00317392	1313.56	657.789	1313.57	657.791	2	17	1.1.1.1564.5
				fig|1428.368.peg.1765	2	99	TAALGIPFTHPFNDTSLIK			0.00213837	2042.09	681.703	2042.08	681.702	3	18	1.1.1.2493.2
				fig|1428.368.peg.1765	2	99	TGLQQQYNTGDWNK		cleaved N-T@N-term	-0.00319936	1651.76	826.885	1651.76	826.887	2	19	1.1.1.1736.16
				fig|1428.368.peg.1765	2	99	TQFVATNTILYNR			-0.00207751	1539.8	770.909	1539.8	770.91	2	21	1.1.1.1935.3
				fig|1428.368.peg.1765	2	99	TVYTPLEGNVGGNWLSPEPVPSIDVIEGNIVDTPGLFK			0.009517	4023.06	1006.77	4023.05	1006.77	4	23	1.1.1.4036.3
				fig|1428.368.peg.1765	2	99	TYPVLTNQTIPQDMACDSCDAGTVMR	Carbamidomethyl(C)@16; Carbamidomethyl(C)@19		0.0020705	2943.29	982.104	2943.29	982.103	3	25	1.1.1.2278.2
				fig|1428.368.peg.1765	2	99	VTARKEGAGEGYVTISDGTEDNTETVK		missed R-K@4; missed K-E@5	0.00284899	2826.35	707.596	2826.35	707.595	4	20	1.1.1.1663.14
				fig|1428.368.peg.1765	2	99	VTDYLVDQAAK		cleaved N-V@N-term	-0.000381733	1221.62	611.819	1221.62	611.819	2	18	1.1.1.1715.10
				fig|1428.368.peg.1765	2	99	WLHNISFEAIDGGVNTSVIK			0.00560296	2199.14	734.053	2199.13	734.051	3	24	1.1.1.2463.2
				fig|1428.368.peg.1765	2	99	WQGAEGALVQK		cleaved N-W@N-term	-0.00658534	1185.61	593.811	1185.61	593.814	2	17	1.1.1.1695.2
				fig|1428.368.peg.1765	2	99	WYNTGLQQQYNTGDWNK			-0.000731447	2114.94	705.989	2114.94	705.989	3	24	1.1.1.1996.2
				fig|1428.368.peg.1765	2	99	YAAYIGYGWTHVSADENNQIYPNMITQIPAVK			-0.00189755	3626.75	1209.92	3626.75	1209.92	3	21	1.1.1.2815.5
				fig|1428.368.peg.1765	2	99	YASNADVNVFCTLQK	Carbamidomethyl(C)@11		-0.0029358	1728.81	865.413	1728.81	865.414	2	24	1.1.1.1936.2
				fig|1428.368.peg.1765	2	99	YDKEIHK		missed K-E@3	-0.00129619	931.475	466.745	931.476	466.745	2	11	1.1.1.1180.2
				fig|1428.368.peg.1765	2	99	YDKEIHKNMNVPYGIPPTNPCDRDYQR	Deamidated(N)@8; Carbamidomethyl(C)@21	missed K-E@3; missed K-N@7; missed R-D@23	0.0118249	3320.55	831.144	3320.53	831.141	4	20	1.1.1.1743.5
				fig|1428.368.peg.1765	2	99	YGDFDSDNWSGENGWK	Deamidated(N)@13		-6.73631e-05	1876.72	939.366	1876.72	939.366	2	25	1.1.1.2142.3
				fig|1428.368.peg.1765	2	99	YLHMPGANIPQFSDTVFPTYAYQK			-0.00127704	2787.34	930.119	2787.34	930.12	3	20	1.1.1.2637.12
				fig|1428.368.peg.1765	2	99	YLPVGNVWHVTNQLFSSGGASVVTGWLFR			0.0159284	3190.65	1064.56	3190.64	1064.55	3	20	1.1.1.4193.2
				fig|1428.368.peg.1765	2	99	YPLAQAPGSVLQNMDYK			-0.00124855	1893.93	947.971	1893.93	947.972	2	22	1.1.1.2250.2
				fig|1428.368.peg.1765	2	99	YPLAQAPGSVLQNMDYKELMNK		missed K-E@17	-0.003265	2509.23	837.418	2509.23	837.419	3	27	1.1.1.2452.3
				fig|1428.368.peg.1765	1.95861	98.88	AKQTLVK		missed K-Q@2	-0.000543178	786.496	394.255	786.496	394.255	2	10	1.1.1.1216.2
				fig|1428.368.peg.1765	1.92082	99	AVNALFK	Deamidated(N)@3		-0.00371772	762.424	382.219	762.428	382.221	2	10	1.1.1.1755.2
				fig|1428.368.peg.1765	1.92082	98.75	ITQIPAVK		cleaved M-I@N-term	0.000424998	868.539	435.277	868.538	435.276	2	13	1.1.1.1638.6
				fig|1428.368.peg.1765	1.79588	98.4	MCLLDLVK	Carbamidomethyl(C)@2		-0.000128949	990.524	496.269	990.524	496.269	2	13	1.1.1.2531.2
				fig|1428.368.peg.1765	1.50864	96.9	NPNNPQLKETVR		missed K-E@8	0.000281486	1408.74	470.588	1408.74	470.588	3	9	1.1.1.1477.5
				fig|1428.368.peg.1765	1.50864	96.9	TSSNVSVR			-0.00252094	848.433	425.224	848.435	425.225	2	10	1.1.1.1333.2
				fig|1428.368.peg.1765	1.36653	99	SKELEVFVQR		cleaved N-S@N-term; missed K-E@2	0.00081796	1233.67	412.231	1233.67	412.231	3	10	1.1.1.1730.2
				fig|1428.368.peg.1765	1.35655	99	HILHAETLVQK		cleaved N-H@N-term	-0.00345734	1287.73	430.249	1287.73	430.251	3	15	1.1.1.1567.4
				fig|1428.368.peg.1765	1.27572	94.69	NPNNPQLK			-0.0027652	923.48	462.747	923.482	462.749	2	11	1.1.1.1405.5
				fig|1428.368.peg.1765	1.24413	98.61	MMTAAEQITNKAIAEQAR	Deamidated(N)@10	missed K-A@11	-0.00376539	1976.96	659.995	1976.97	659.996	3	14	1.1.1.1733.12
				fig|1428.368.peg.1765	1.02687	98.91	MITQIPAVK		cleaved N-M@N-term	-0.00156372	999.577	500.796	999.579	500.797	2	10	1.1.1.1759.6
				fig|1428.368.peg.1765	0.966576	89.16	LYEVPTK			0.000103144	848.464	425.24	848.464	425.239	2	11	1.1.1.1602.2
				fig|1428.368.peg.1765	0.931814	88.27	DLIIDGGYQGERGTK		missed R-G@12	-0.000413731	1620.81	541.277	1620.81	541.278	3	12	1.1.1.1730.7
				fig|1428.368.peg.1765	0.806875	84.36	ADDPIFK			-0.00121809	804.401	403.208	804.402	403.208	2	11	1.1.1.1665.2
				fig|1428.368.peg.1765	0.785156	99	ERNMTNQPSEVSGTNAYPGNNNR	Deamidated(N)@3; Deamidated(N)@20	missed R-N@2	0.00619172	2551.11	851.376	2551.1	851.374	3	12	1.1.1.1610.25
				fig|1428.368.peg.1765	0.705534	80.29	MPYFSAR			-0.000260312	870.406	436.21	870.406	436.21	2	11	1.1.1.1747.2
				fig|1428.368.peg.1765	0.686133	79.42	LYRDAACNWEK	Carbamidomethyl(C)@7	missed R-D@3	0.00161312	1424.65	475.891	1424.65	475.891	3	9	1.1.1.1627.7
				fig|1428.368.peg.1765	0.552842	98.11	NEYEILDHGR		cleaved N-N@N-term	0.0107913	1244.59	623.302	1244.58	623.297	2	13	1.1.1.1674.11
				fig|1428.368.peg.1765	0.536107	70.92	GFVGNSK			0.00109013	707.361	354.688	707.36	354.687	2	7	1.1.1.1413.2
				fig|1428.368.peg.1765	0.531653	70.56	DLIIDGGYQGERGTKK		missed R-G@12; missed K-K@15	0.00135407	1748.91	438.234	1748.91	438.234	4	11	1.1.1.1654.4
				fig|1428.368.peg.1765	0.464706	99	ADDPIFKGR	Formyl(K)@7	missed K-G@7	-0.0018826	1045.52	523.766	1045.52	523.767	2	13	1.1.1.1721.15
				fig|1428.368.peg.1765	0.185752	34.81	LYRDAACNWEKNPNNPQLK	Carbamidomethyl(C)@7	missed R-D@3; missed K-N@11	0.000896679	2330.12	777.715	2330.12	777.715	3	8	1.1.1.1682.23
				fig|1428.368.peg.1765	0.0963675	19.92	SLYGQRNVLR		missed R-N@6	-0.000306619	1204.67	402.563	1204.67	402.563	3	8	1.1.1.1610.3
				fig|1428.368.peg.1765	0.0824945	79.28	GPSNNYEASAYR		cleaved N-G@N-term	-0.00149407	1327.58	664.796	1327.58	664.797	2	8	1.1.1.1568.18
				fig|1428.368.peg.1765	0.0649968	54.84	SPIQEGYKERN		cleaved N-M@C-term; missed K-E@8; missed R-N@10	0.00124026	1319.65	440.89	1319.65	440.89	3	9	1.1.1.1479.5
				fig|1428.368.peg.1765	0.0277972	21.87	DQYYNNNEYEILDHGRR	Deamidated(N)@6	cleaved M-D@N-term; missed R-R@16	0.00859397	2198.97	550.75	2198.96	550.748	4	11	1.1.1.1789.8
				fig|1428.368.peg.1765	0.00877392	33.96	LRPDITLN		cleaved N-H@C-term	-0.000911067	940.533	471.274	940.534	471.274	2	8	1.1.1.1746.3
				fig|1428.368.peg.1765	0.00612309	67.23	LPVPEGR			1.00131	767.435	384.725	766.434	384.224	2	10	1.1.1.1559.4
				fig|1428.368.peg.1765	0.00261362	42.41	IQEGYKER		cleaved P-I@N-term; missed K-E@6	0.00160848	1021.52	511.768	1021.52	511.767	2	8	1.1.1.1490.10
			Cry32Da-like	fig|1428.368.peg.1846	2	99	ASGGTDYQVIK			-0.00115134	1137.57	569.79	1137.57	569.791	2	19	1.1.1.1601.7
				fig|1428.368.peg.1846	2	99	ATFDNLEVIEANPLTGEALAR			0.00284184	2243.15	748.723	2243.14	748.722	3	25	1.1.1.2911.2
				fig|1428.368.peg.1846	2	99	AVNALFTSDAK			-0.00147397	1135.59	568.8	1135.59	568.801	2	16	1.1.1.1776.3
				fig|1428.368.peg.1846	2	99	AVQTAQGAIQALFTDSNQNR			2.27864e-05	2132.06	711.694	2132.06	711.694	3	26	1.1.1.2613.3
				fig|1428.368.peg.1846	2	99	DLEVFITR			0.000414085	991.534	496.774	991.534	496.774	2	13	1.1.1.2147.2
				fig|1428.368.peg.1846	2	99	DNATTFVDPK			8.85921e-05	1106.52	554.269	1106.52	554.269	2	13	1.1.1.1652.11
				fig|1428.368.peg.1846	2	99	EGSGEGYVTISDGTEDNTETLK			0.00336093	2301.02	768.013	2301.01	768.012	3	27	1.1.1.1801.9
				fig|1428.368.peg.1846	2	99	FEPVRDNATTFVDPK		missed R-D@5	0.000998851	1734.86	868.437	1734.86	868.436	2	20	1.1.1.1764.6
				fig|1428.368.peg.1846	2	99	FTVGEVATR			-0.00123255	978.512	490.263	978.513	490.264	2	14	1.1.1.1702.3
				fig|1428.368.peg.1846	2	99	GPGSTGGDLVSLPTYAK			-0.00237773	1618.82	810.416	1618.82	810.417	2	31	1.1.1.1929.4
				fig|1428.368.peg.1846	2	99	GQALIGLK			-0.00129554	798.495	400.255	798.496	400.255	2	13	1.1.1.1702.2
				fig|1428.368.peg.1846	2	99	GYETILLPLYAQAANIHLIVLR			0.00434738	2480.42	827.814	2480.42	827.812	3	20	1.1.1.3877.2
				fig|1428.368.peg.1846	2	99	IDPFDEPIIIDK			0.00366106	1413.74	707.879	1413.74	707.877	2	21	1.1.1.2465.3
				fig|1428.368.peg.1846	2	99	IEIPLTSSAGQLYTIR			-0.00177798	1760.97	881.49	1760.97	881.491	2	26	1.1.1.2475.4
				fig|1428.368.peg.1846	2	99	INDYQIDYK			0.000505172	1170.56	586.285	1170.56	586.285	2	14	1.1.1.1707.3
				fig|1428.368.peg.1846	2	99	IPYVYNAFLQGALPPVPGETSDIFQQLSSAVAIAR			0.0287388	3731.98	934.004	3731.96	933.996	4	22	1.1.1.4536.2
				fig|1428.368.peg.1846	2	99	IWETNPTPGNTSQLLDAFR			0.00289578	2159.07	720.697	2159.06	720.695	3	27	1.1.1.2776.2
				fig|1428.368.peg.1846	2	99	KAVNALFTSDAK		missed K-A@1	-0.00141249	1263.68	422.234	1263.68	422.235	3	15	1.1.1.1647.3
				fig|1428.368.peg.1846	2	99	KEGSGEGYVTISDGTEDNTETLK		missed K-E@1	0.00760129	2429.12	810.712	2429.11	810.71	3	21	1.1.1.1729.16
				fig|1428.368.peg.1846	2	99	LVECMSDKIYPQEK	Carbamidomethyl(C)@4	missed K-I@8	-0.00107082	1738.83	870.42	1738.83	870.421	2	19	1.1.1.1724.12
				fig|1428.368.peg.1846	2	99	NLALDHIDRINDYQIDYK		missed R-I@9	0.00305706	2218.1	740.375	2218.1	740.375	3	21	1.1.1.2039.3
				fig|1428.368.peg.1846	2	99	NLLNHGDFEFPDWSGENGWK	Deamidated(N)@17		0.00134942	2362.03	788.351	2362.03	788.35	3	24	1.1.1.2802.2
				fig|1428.368.peg.1846	2	99	QIGATIFGWTHTSVDPNNTIDTTK			0.0044321	2616.29	873.103	2616.28	873.101	3	19	1.1.1.2401.2
				fig|1428.368.peg.1846	2	99	QNTFPPIEVPEGTPPPSHR			-0.000363793	2099.04	700.688	2099.04	700.688	3	24	1.1.1.1860.5
				fig|1428.368.peg.1846	2	99	SCQDAMPHLDTR	Carbamidomethyl(C)@2		0.00243903	1429.61	477.544	1429.61	477.543	3	19	1.1.1.1635.3
				fig|1428.368.peg.1846	2	99	SDPAQNTMSAIEAR			-0.00123178	1489.68	745.848	1489.68	745.849	2	16	1.1.1.1767.10
				fig|1428.368.peg.1846	2	99	TFEIFPETNR			0.000338128	1252.61	627.312	1252.61	627.312	2	16	1.1.1.2095.2
				fig|1428.368.peg.1846	2	99	TLDTNMITALQGLTDEYEYYHIPLDVSTGQK			0.000120861	3528.7	1177.24	3528.7	1177.24	3	19	1.1.1.3818.2
				fig|1428.368.peg.1846	2	99	TSNHVSVMSGNPIFK			0.001388	1616.8	539.94	1616.8	539.94	3	23	1.1.1.1804.3
				fig|1428.368.peg.1846	2	99	VESIELIR			0.00137773	957.551	479.783	957.549	479.782	2	13	1.1.1.1811.2
				fig|1428.368.peg.1846	2	99	YLHMPGADNPQLSDQVYPTYAYQK			0.00369025	2798.3	933.775	2798.3	933.774	3	22	1.1.1.2091.2
				fig|1428.368.peg.1846	2	99	YSNGEYKDVEAWNLR	Deamidated(N)@3	missed K-D@7	0.000827945	1843.84	615.62	1843.84	615.62	3	25	1.1.1.1925.2
				fig|1428.368.peg.1846	2	99	YTDYDVPSTPYSGGNLTYNAFR			0.0111171	2500.13	834.384	2500.12	834.38	3	23	1.1.1.2322.2
				fig|1428.368.peg.1846	2	99	YTWVGNSWTK			-0.0015564	1240.59	621.3	1240.59	621.301	2	15	1.1.1.1937.2
				fig|1428.368.peg.1846	1.50864	97.38	VQQTFVK			-0.00197509	848.474	425.244	848.476	425.245	2	9	1.1.1.1534.6
				fig|1428.368.peg.1846	1.33724	96.13	TKQWFEPR		missed K-Q@2	-0.00156118	1090.55	364.525	1090.56	364.526	3	11	1.1.1.1668.2
				fig|1428.368.peg.1846	0.899629	89.21	LAQSDMR			-0.00327157	819.388	410.701	819.391	410.703	2	7	1.1.1.1421.3
				fig|1428.368.peg.1846	0.764472	85.11	VYTAAVKTEFTR		missed K-T@7	-0.00623748	1384.73	693.372	1384.74	693.375	2	9	1.1.1.1655.24
				fig|1428.368.peg.1846	0.716699	83.37	NLALDHIDR			-0.00358697	1065.55	533.784	1065.56	533.786	2	11	1.1.1.1666.4
				fig|1428.368.peg.1846	0.402305	64.45	IFPETNR		cleaved E-I@N-term	-0.0030043	875.447	438.731	875.45	438.732	2	8	1.1.1.1585.4
				fig|1428.368.peg.1846	0.231362	45.61	YPWVR			-0.00130046	719.374	360.694	719.375	360.695	2	6	1.1.1.1737.2
				fig|1428.368.peg.1846	0.221849	78.72	MCLLDQVK	Oxidation(M)@1; Carbamidomethyl(C)@2		0.0023886	1021.5	511.755	1021.49	511.754	2	9	1.1.1.1716.7
				fig|1428.368.peg.1846	0.131356	29.57	YTGEEQAGGLIR			-0.000163349	1292.64	647.325	1292.64	647.325	2	9	1.1.1.1700.14
				fig|1428.368.peg.1846	0.0777937	49.87	INDYQIDYKNK	Deamidated(N)@10	missed K-N@9	0.000217777	1413.68	472.233	1413.68	472.233	3	8	1.1.1.1631.4
				fig|1428.368.peg.1846	0.0338583	89.99	PAQNTMSAIEAR		cleaved D-P@N-term	-0.0226926	1287.6	644.808	1287.62	644.819	2	11	1.1.1.1651.19
			Cry32Eb-like	fig|1428.368.peg.6268	2	99	ALPVVPGETYDIFLQLSDAINIAR			0.0131829	2614.41	872.479	2614.4	872.474	3	20	1.1.1.4543.2
				fig|1428.368.peg.6268	2	99	ALYDQRNALVNGDFSAR	Deamidated(N)@11	missed R-N@6	0.00676097	1909.94	637.652	1909.93	637.65	3	23	1.1.1.1821.4
				fig|1428.368.peg.6268	2	99	ATSPVSSNVFPTLR			-0.000926642	1474.78	738.396	1474.78	738.396	2	23	1.1.1.1997.3
				fig|1428.368.peg.6268	2	99	DAIQMLFTDSNQNR			0.000387696	1651.76	826.889	1651.76	826.888	2	22	1.1.1.2474.2
				fig|1428.368.peg.6268	2	99	EAVNTLFLNDALQLK			-0.00367317	1687.91	844.963	1687.91	844.965	2	24	1.1.1.2831.2
				fig|1428.368.peg.6268	2	99	EGSGEGYVTISDGTEENTETLK			0.00513998	2315.03	772.685	2315.03	772.684	3	28	1.1.1.1799.4
				fig|1428.368.peg.6268	2	99	FIADEKATSPVSSNVFPTLR		missed K-A@6	0.00441643	2178.14	727.053	2178.13	727.051	3	27	1.1.1.2096.2
				fig|1428.368.peg.6268	2	99	GAVQIAR			-0.001009	713.417	357.716	713.418	357.716	2	10	1.1.1.1475.2
				fig|1428.368.peg.6268	2	99	GFVGNSKDLELLVAR		missed K-D@7	0.00808614	1616.9	539.973	1616.89	539.97	3	25	1.1.1.2178.2
				fig|1428.368.peg.6268	2	99	IKGAVQIAR		missed K-G@2	-0.00295849	954.594	478.305	954.597	478.306	2	10	1.1.1.1497.7
				fig|1428.368.peg.6268	2	99	IPYVYNQFLQR			0.000696078	1439.76	720.886	1439.76	720.885	2	19	1.1.1.2269.2
				fig|1428.368.peg.6268	2	99	ISNHVYVTSDNPIFK			0.0050229	1732.88	578.635	1732.88	578.633	3	24	1.1.1.1828.3
				fig|1428.368.peg.6268	2	99	KEGSGEGYVTISDGTEENTETLK		missed K-E@1	0.00406737	2443.13	815.383	2443.12	815.382	3	17	1.1.1.1724.11
				fig|1428.368.peg.6268	2	99	LDHVEVVEVGPLTGDALTR			0.00685321	2019.07	674.031	2019.06	674.029	3	26	1.1.1.2147.3
				fig|1428.368.peg.6268	2	99	LVECISDPIHTK	Carbamidomethyl(C)@4		-0.00170319	1410.72	706.365	1410.72	706.366	2	19	1.1.1.1720.18
				fig|1428.368.peg.6268	2	99	MCLLEQVK	Carbamidomethyl(C)@2		0.0123187	1019.53	510.771	1019.51	510.764	2	13	1.1.1.1813.2
				fig|1428.368.peg.6268	2	99	NALVNGDFSAR	Deamidated(N)@5		-0.000184905	1163.56	582.786	1163.56	582.786	2	15	1.1.1.1748.4
				fig|1428.368.peg.6268	2	99	NLLHHGDFESPDWSGENR			0.00438689	2108.93	528.241	2108.93	528.24	4	18	1.1.1.1782.4
				fig|1428.368.peg.6268	2	99	NLLHHGDFESPDWSGENRWK		missed R-W@18	0.00697336	2423.11	606.785	2423.1	606.783	4	19	1.1.1.1831.2
				fig|1428.368.peg.6268	2	99	QILEAETWVQK	Gln->pyro-Glu@N-term		0.0008251	1326.68	664.349	1326.68	664.348	2	18	1.1.1.2682.2
				fig|1428.368.peg.6268	2	99	VTDYQVDQAAK			-0.00269325	1236.6	619.305	1236.6	619.307	2	18	1.1.1.1549.18
				fig|1428.368.peg.6268	2	99	YLNMPNANTPQFSDK			-0.00355326	1738.79	870.405	1738.8	870.406	2	22	1.1.1.1856.4
				fig|1428.368.peg.6268	1.21467	95.5	LQSAITLK			-0.00119176	872.532	437.273	872.533	437.274	2	12	1.1.1.1668.6
				fig|1428.368.peg.6268	1.20761	95.47	DLELLVAR			-0.000858204	927.538	464.776	927.539	464.777	2	12	1.1.1.2117.2
				fig|1428.368.peg.6268	0.449772	94.61	SKDLELLVAR		cleaved N-S@N-term; missed K-D@2	0.00117747	1142.67	381.896	1142.67	381.896	3	13	1.1.1.1775.2
				fig|1428.368.peg.6268	0.106238	27.82	MSYASNHYK			0.00154922	1099.48	367.5	1099.48	367.499	3	7	1.1.1.1462.2
				fig|1428.368.peg.6268	0.0660068	90.42	ISNHVYVTSDN		cleaved N-P@C-term	-0.00881384	1247.57	624.792	1247.58	624.796	2	12	1.1.1.1563.8
				fig|1428.368.peg.6268	0.0070049	17.97	KEGSGEGYVTISDGTEEN		cleaved N-T@C-term; missed K-E@1	0.00114875	1870.81	936.411	1870.81	936.411	2	9	1.1.1.1682.26
			Cry73Aa-like	fig|1428.368.peg.6270	2	99	FGAGWGLPSTEVEDNYTR			-0.00315684	1997.91	999.962	1997.91	999.963	2	24	1.1.1.2307.4
				fig|1428.368.peg.6270	2	99	FGTDPQAQWK			-0.000368547	1176.56	589.285	1176.56	589.285	2	17	1.1.1.1715.9
				fig|1428.368.peg.6270	2	99	GPGSTGGDLIQLASGYLQYSFPSTDNR			0.00381349	2800.33	934.452	2800.33	934.451	3	24	1.1.1.3691.2
				fig|1428.368.peg.6270	2	99	GWTNNSSVDAIESTLVR			0.000260739	1847.9	924.958	1847.9	924.958	2	26	1.1.1.2478.2
				fig|1428.368.peg.6270	2	99	IRYASTNGSTLTLKK	Deamidated(N)@7	missed R-Y@2; missed K-K@14	0.00131205	1652.91	414.235	1652.91	414.235	4	11	1.1.1.1632.3
				fig|1428.368.peg.6270	2	99	ITNTLHYVGSSTTWEQSFSATPIGSIK			0.00403193	2924.46	975.827	2924.46	975.826	3	23	1.1.1.2473.5
				fig|1428.368.peg.6270	2	99	IYNNPYGVQIQLSR			-0.00243349	1663.87	832.94	1663.87	832.941	2	23	1.1.1.2035.2
				fig|1428.368.peg.6270	2	99	LQARTAEYTNHCTNTYDK	Carbamidomethyl(C)@12	missed R-T@4	-0.00409296	2184.98	547.253	2184.99	547.254	4	12	1.1.1.1532.14
				fig|1428.368.peg.6270	2	99	MNQNCNHNEYEILDSGNVSCQPK	Carbamidomethyl(C)@5; Carbamidomethyl(C)@20		0.00115897	2750.15	917.724	2750.15	917.723	3	18	1.1.1.1765.7
				fig|1428.368.peg.6270	2	99	NLYEAETVPIAFR			-0.0016162	1521.78	761.898	1521.78	761.899	2	21	1.1.1.2282.2
				fig|1428.368.peg.6270	2	99	NLYEAETVPIAFRK		missed R-K@13	0.00462476	1649.88	550.968	1649.88	550.966	3	18	1.1.1.1929.2
				fig|1428.368.peg.6270	2	99	NQNCNHNEYEILDSGNVSCQPK	Carbamidomethyl(C)@4; Carbamidomethyl(C)@19	cleaved M-N@N-term	0.00132516	2619.11	874.044	2619.11	874.043	3	20	1.1.1.1745.20
				fig|1428.368.peg.6270	2	99	QAYDLAPNPTDYNK			0.00205083	1608.74	805.379	1608.74	805.378	2	20	1.1.1.1776.9
				fig|1428.368.peg.6270	2	99	QAYDLAPNPTDYNKYPYLDPYSKDPIYGK		missed K-Y@14; missed K-D@23	0.00408481	3408.62	853.163	3408.62	853.162	4	22	1.1.1.2280.2
				fig|1428.368.peg.6270	2	99	QFMDAVEYLVSQK	Gln->pyro-Glu@N-term		0.00275707	1539.73	770.873	1539.73	770.871	2	20	1.1.1.4134.2
				fig|1428.368.peg.6270	2	99	QFTSTNTVIEYAMPSFR			0.00537514	1990.95	664.658	1990.95	664.656	3	21	1.1.1.2635.3
				fig|1428.368.peg.6270	2	99	RFGTDPQAQWK		missed R-F@1	-0.00115627	1332.66	445.226	1332.66	445.226	3	14	1.1.1.1647.4
				fig|1428.368.peg.6270	2	99	SPHLVTELTK			-0.00107514	1123.62	562.819	1123.62	562.819	2	17	1.1.1.1657.8
				fig|1428.368.peg.6270	2	99	SSVDAIESTLVR		cleaved N-S@N-term	-0.00268942	1275.66	638.84	1275.67	638.841	2	19	1.1.1.1978.3
				fig|1428.368.peg.6270	2	99	TAEYTNHCTNTYDK	Carbamidomethyl(C)@8; Deamidated(N)@10		-0.00215107	1717.69	573.57	1717.69	573.57	3	17	1.1.1.1491.7
				fig|1428.368.peg.6270	2	99	TTQIPAVK			-0.000883265	856.501	429.258	856.502	429.258	2	13	1.1.1.1561.2
				fig|1428.368.peg.6270	2	99	TVHNVSATDIGNLSLSLGAIPFGFSFYNK			0.0070101	3068.57	1023.86	3068.56	1023.86	3	27	1.1.1.3641.2
				fig|1428.368.peg.6270	2	99	VGGFEVPLLTTFAQAANLHLLLLR			0.0134267	2592.49	865.172	2592.48	865.167	3	19	1.1.1.4499.2
				fig|1428.368.peg.6270	2	99	YASTNGSTLTLK	Deamidated(N)@5		-0.000602067	1255.63	628.822	1255.63	628.822	2	18	1.1.1.1685.14
				fig|1428.368.peg.6270	2	99	YASTNGSTLTLKK	Deamidated(N)@5	missed K-K@12	-0.00291986	1383.72	692.868	1383.72	692.87	2	17	1.1.1.1586.17
				fig|1428.368.peg.6270	2	99	YYTAPVDWNLFNDFRR		missed R-R@15	0.00322264	2075.99	693.004	2075.99	693.002	3	14	1.1.1.2873.2
				fig|1428.368.peg.6270	1.82391	99	PYSKDPIYGK		cleaved D-P@N-term; missed K-D@4	-0.00231397	1166.59	389.872	1166.6	389.873	3	9	1.1.1.1538.6
				fig|1428.368.peg.6270	1.30103	95.95	EVYSTVYGR			0.000288822	1072.52	537.267	1072.52	537.267	2	11	1.1.1.1639.10
				fig|1428.368.peg.6270	1.25964	95.57	LEGVQR			-0.000417796	700.386	351.2	700.387	351.201	2	9	1.1.1.1417.2
				fig|1428.368.peg.6270	0.879426	98.37	SLTSTNTIATDK		cleaved N-S@N-term	0.00232175	1250.64	626.326	1250.64	626.325	2	9	1.1.1.1570.18
				fig|1428.368.peg.6270	0.552842	99	ITNTLHYVGS		cleaved S-S@C-term	0.0002741	1103.56	552.788	1103.56	552.788	2	13	1.1.1.1679.8
				fig|1428.368.peg.6270	0.530178	74.92	SEAVSRLEGVQR		missed R-L@6	0.00426101	1329.7	444.242	1329.7	444.241	3	10	1.1.1.1586.3
				fig|1428.368.peg.6270	0.255707	50	ITDAVRSEAVSR		missed R-S@6	-0.000343894	1302.69	435.237	1302.69	435.237	3	16	1.1.1.1506.2
				fig|1428.368.peg.6270	0.234331	96.03	TVHNVSATDIGN		cleaved N-L@C-term	-0.00208386	1226.59	614.301	1226.59	614.302	2	10	1.1.1.1559.21
				fig|1428.368.peg.6270	0.0716041	18.29	LTFDER			-0.00127295	779.38	390.697	779.381	390.698	2	7	1.1.1.1624.4
				fig|1428.368.peg.6270	0.0710923	59.16	SLTSTNTIATDKTTQIPAVK		cleaved N-S@N-term; missed K-T@12	0.00924912	2089.14	697.386	2089.13	697.383	3	10	1.1.1.1745.18
				fig|1428.368.peg.6270	0.0574959	85	SFSATPIGSIK		cleaved Q-S@N-term	0.00275602	1106.6	554.307	1106.6	554.306	2	12	1.1.1.1791.3
				fig|1428.368.peg.6270	0.00921731	51.8	PHLVTELTK		cleaved S-P@N-term	-0.00278977	1036.59	519.302	1036.59	519.303	2	8	1.1.1.1657.6
PEPTIDE SUMMARY INTERPRETATION
Name
The name of the protein.
Contrib
The contribution of this peptide, in ProtScore units, to the Unused ProtScore for a protein in this group. The sum of Contrib values from all black peptides in a group equals the Unused ProtScore of the winner
protein in that group. If a peptide does not belong to the winner (i.e., it is a blue peptide) and if no other peptides from the same spectrum belong to the winner, Contrib is the peptide’s contribution to the best other protein in the group
it belongs to (where "best" is the protein with the highest Unused ProtScore).
Conf (Confidence)
The confidence for the peptide identification, expressed as a percentage.
Sequence
The sequence of the peptide identified by the search.
Modifications
Modifications found by the search.
Cleavages
Indicates any atypical or missed cleavage sites. Missed cleavages are shown as “Missed Residue1-Residue2@Position”. Atypical cleavages are shown as “Cleaved Residue1-Residue2@Position”, where
“Position” is either “N-term” or “C-term”.
DMass (Delta Mass)
The difference in mass between the precursor MW and the theoretical MW of the matching peptide
sequence.
Theor MW (Theoretical MW)
The theoretical precursor molecular weight for peptide sequence, including modifications.
z (Theoretical z)
The charge for the fragmented ion, as calculated by the Paragon Algorithm.
Sc (Score)
The score for the peptide; this is based on matching ions of various charge states.
Spectrum
Denotes a particular MS/MS spectrum in this processing run. For .wiff data, Spectrum is: Data
Set.Sample.Period.Cycle.Experiment. For TOF/TOF Series Explorer Software data, Spectrum is: Data
Set.Chromatogram Name.MS/MS Job Run.Fraction.MS/MS Spectrum. The Data Set number is the order
