# Supplementary material for: A Genomic and Proteomic Approach to Identify and Quantify the Expressed Bacillus thuringiensis Proteins in the Supernatant and Parasporal Crystal
Source: Toxins (Basel). 2018 May 10;10(5):193. doi: 10.3390/toxins10050193 (PMC5983249; doi:10.3390/toxins10050193)
Supplement: Supplementary file 1 [file toxins-10-00193-s001.zip › Table S3.xlsx]

## Sheet: Mascot identification and emPAI
Table S3. Result of the Mascot search in the three replicates of the concentrated supernatants and solubilized proteins form spore/crystal mixtures.
Bt isolate	Sample	Replicate	Protein	Accession	Score	Mass protein (Da)	Num.sig.matches	Num.sig.sequen.	emPAI	% mol emPAI	% weight emPAI
E-SE10.2	Supernatant_24h	1	Cry23Aa-like	>fig|11428.3.peg.70	2463	29277	47	15	30.98	1.74375	1.26257
			Vip2Ac-like_1	>fig|11428.3.peg.6	375	51622	12	10	1.28	0.0720465	0.0919798
			Sip1Aa-like_1	>fig|11428.3.peg.27	465	40792	9	9	1.56	0.0878067	0.0885824
		2	Cry23Aa-like	>fig|11428.3.peg.70	2346	29277	41	15	41.69	1.16451	0.858279
			Vip2Ac-like_1	>fig|11428.3.peg.6	502	51622	12	12	1.69	0.0472062	0.0613467
			Sip1Aa-like_1	>fig|11428.3.peg.27	363	40792	7	6	1.08	0.0301673	0.0309791
		3	Cry23Aa-like	>fig|11428.3.peg.70	3031	29277	57	16	64.83	0.806017	0.595781
			Vip2Ac-like_1	>fig|11428.3.peg.6	497	51622	12	12	1.69	0.0210114	0.0273846
			Sip1Aa-like_1	>fig|11428.3.peg.27	635	40792	11	8	1.56	0.0193951	0.0199749
	Supernatant_48h	1	Cry23Aa-like	>fig|11428.3.peg.70	2245	29277	39	15	47.46	2.65896	1.98705
			Vip2Ac-like_1	>fig|11428.3.peg.6	444	51622	10	9	1.27	0.071152	0.0937547
			Sip1Aa-like_1	>fig|11428.3.peg.27	375	40792	9	6	1.07	0.059947	0.0624185
		2	Cry23Aa-like	>fig|11428.3.peg.70	1322	29277	24	11	12.45	0.769359	0.41884
			Vip2Ac-like_1	>fig|11428.3.peg.6	299	51622	10	10	1.28	0.0790988	0.00973931
			Sip1Aa-like_1	>fig|11428.3.peg.27	398	40792	9	6	1.3	0.0803347	0.0131666
		3	Cry23Aa-like	>fig|11428.3.peg.70	1142	29277	22	9	8.92	0.415481	0.298216
			Vip2Ac-like_1	>fig|11428.3.peg.6	350	51622	9	9	1.09	0.0507706	0.0642541
			Sip1Aa-like_1	>fig|11428.3.peg.27	241	40792	4	3	0.51	0.0237551	0.0237566
	Crystal_72h	1	Cry23Aa-like	>fig|11428.3.peg.70	8268	29277	129	23	312.97	33.8394	30.48
		2	Cry23Aa-like	>fig|11428.3.peg.70	5628	29277	92	16	30.49	5.59902	4.74379
		3	Cry23Aa-like	>fig|11428.3.peg.70	2620	29277	51	16	19.46	2.78581	2.49251
O-V84.2	Supernatant_24h	1	Vip4Aa-like_1	>fig|1428.368.peg.1872	319	97552	7	6	0.35	0.000567928	1.08115e-05
			Vip4Aa-like_2	>fig|1428.368.peg.707	206	87546	3	3	0.16	0.000259624	3.19164e-06
			Vip2Ac-like_2	>fig|1428.368.peg.1873	315	80797	7	6	0.37	0.000600381	1.1286e-05
		2	Vip4Aa-like_1	>fig|1428.368.peg.1872	401	97552	8	8	0.42	0.000349087	0.000867311
			Vip4Aa-like_2	>fig|1428.368.peg.707	127	87546	3	2	0.1	8.31159e-05	0.000185321
			Vip2Ac-like_2	>fig|1428.368.peg.1873	62	80797	3	3	0.17	0.000141297	0.000290759
			Vip2Ac-like_3	>fig|1428.368.peg.706	29	23282	1	1	0.2	0.000166232	9.85688e-05
			Sip1Aa-like_2	>fig|1428.368.peg.3296	20	38717	1	1	0.11	9.14275e-05	9.01537e-05
		3	Vip4Aa-like_1	>fig|1428.368.peg.1872	354	97552	6	5	0.3	0.00064811	0.0016099
			Vip4Aa-like_2	>fig|1428.368.peg.707	24	87546	1	1	0.05	0.000108018	0.000240796
			Vip2Ac-like_2	>fig|1428.368.peg.1873	84	80797	4	4	0.23	0.000496884	0.00102227
			Sip1Aa-like_2	>fig|1428.368.peg.3296	53	38717	1	1	0.11	0.00023764	0.000234281
	Supernatant_48h	1	Vip4Aa-like_1	>fig|1428.368.peg.1872	158	97552	6	6	0.3	0.0078872	0.0196463
			Vip4Aa-like_2	>fig|1428.368.peg.1873	45	80797	3	3	0.17	0.00446941	0.00922079
		2	Vip4Aa-like_1	>fig|1428.368.peg.1872	192	97552	7	6	0.36	0.00267574	0.00664459
			Vip4Aa-like_2	>fig|1428.368.peg.1873	143	80797	6	6	0.37	0.00275007	0.00565622
		3	Vip4Aa-like_1	>fig|1428.368.peg.1872	119	97552	2	2	0.09	0.00119419	0.00299152
			Vip4Aa-like_2	>fig|1428.368.peg.1873	79	80797	3	3	0.17	0.00225569	0.00468013
	Crystal_72h	1	Cry45Aa-like_1	>fig|1428.368.peg.6440	771	30698	21	16	9.24	3.7222	2.82519
			Cry45Aa-like_2	>fig|1428.368.peg.5334	1217	29334	28	12	10.47	4.21769	3.05903
			Cry45Aa-like_3	>fig|1428.368.peg.6442	701	25605	21	11	7.39	2.97696	1.88467
			Cry32Ea-like	>fig|1428.368.peg.1765	6700	151178	146	70	16.14	6.50177	24.3029
			Cry32Da-like	>fig|1428.368.peg.1846	2605	153302	62	51	4	1.61134	6.10764
			Cry32Eb-like	>fig|1428.368.peg.6268	2292	76802	50	33	8.11	3.267	6.20382
			Cry73Aa-like	>fig|1428.368.peg.6270	1957	72173	43	24	3.89	1.56703	2.79634
		2	Cry45Aa-like_1	>fig|1428.368.peg.6440	1834	30698	37	17	19.1	3.03763	2.46583
			Cry45Aa-like_2	>fig|1428.368.peg.5334	1750	29334	40	14	16.47	2.61936	2.03181
			Cry45Aa-like_3	>fig|1428.368.peg.6442	2191	25605	45	17	49.17	7.81991	5.29473
			Cry32Ea-like	>fig|1428.368.peg.1765	10268	151178	223	79	39.43	6.27087	25.0688
			Cry32Da-like	>fig|1428.368.peg.1846	4007	153302	99	61	8.38	1.33274	5.4027
			Cry32Eb-like	>fig|1428.368.peg.6268	3380	76802	84	32	13.82	2.19791	4.46375
			Cry73Aa-like	>fig|1428.368.peg.6270	3236	72173	68	36	13.79	2.19314	4.1856
		3	Cry45Aa-like_1	>fig|1428.368.peg.6440	870	30698	28	13	5.87	1.80983	2.8243
			Cry45Aa-like_2	>fig|1428.368.peg.5334	1463	29334	36	13	14.54	4.48295	6.26606
			Cry45Aa-like_3	>fig|1428.368.peg.6442	903	25605	21	12	10.82	3.33601	5.27908
			Cry32Ea-like	>fig|1428.368.peg.1765	7950	151178	170	77	21.56	6.64735	25.8941
			Cry32Da-like	>fig|1428.368.peg.1846	2585	153302	62	48	3.78	1.16544	6.21226
			Cry32Eb-like	>fig|1428.368.peg.6268	2259	76802	52	32	8.24	2.54054	7.23376
			Cry73Aa-like	>fig|1428.368.peg.6270	2088	72173	49	27	7.42	2.28772	6.59862
