# Supplementary material for: A Genomic and Proteomic Approach to Identify and Quantify the Expressed Bacillus thuringiensis Proteins in the Supernatant and Parasporal Crystal
Source: Toxins (Basel). 2018 May 10;10(5):193. doi: 10.3390/toxins10050193 (PMC5983249; doi:10.3390/toxins10050193)
Supplement: Supplementary file 1 [file toxins-10-00193-s001.zip › Table S4.xlsx]

## Sheet: ProtsumE24v48
Table S5.1 Protein summary of the specific search with the supernatant of Bt isoalte E-SE10.2 at 24h and 48 h with Protein Pilot v4.5
Name	Unused	Total	%Cov	%Cov(50)	%Cov(95)	Peptides(95%)
fig|11428.3.peg.2783	127.14	127.14	99.18	98.1	96.47	183
fig|11428.3.peg.2649	121.26	121.26	91.18	89.71	88.42	103
fig|11428.3.peg.1595	119.03	119.03	76.6	76.24	75.71	77
fig|11428.3.peg.4	110.44	110.44	92.25	84.5	82.61	112
fig|11428.3.peg.1963	106.09	106.09	84.25	82.37	80.35	68
fig|11428.3.peg.1597	100.14	100.14	70.27	68.67	65.84	62
fig|11428.3.peg.2209	99.42	99.42	97.91	97.49	92.47	69
fig|11428.3.peg.2174	92.41	92.41	88.16	83.3	83.3	53
fig|11428.3.peg.4831	87.99	87.99	80.34	75.19	71.56	46
fig|11428.3.peg.4925	81.6	81.6	84.47	83.3	78.25	49
fig|11428.3.peg.3413	80.79	80.79	67.98	64.57	62.2	49
fig|11428.3.peg.4825	78.24	78.24	67.67	61.81	54.52	44
fig|11428.3.peg.2069	77.54	77.54	78.07	77.25	74.8	53
fig|11428.3.peg.3356	74.57	74.57	46.43	39.02	36.85	39
fig|11428.3.peg.446	74.48	74.48	93.82	89.78	88.98	44
fig|11428.3.peg.5599	72.29	72.29	75	67.59	64.26	42
fig|11428.3.peg.3215	72.08	72.08	70.08	63.48	60.11	39
fig|11428.3.peg.1958	71.61	71.61	42.57	35.51	33.14	35
fig|11428.3.peg.2213	70.9	70.9	80.45	74.69	72.43	48
fig|11428.3.peg.4960	68.13	68.13	94.9	88.86	85.15	42
fig|1428.368.peg.2705	67.65	67.65	66.81	64.47	64.47	54
fig|11428.3.peg.5059	67.14	67.14	74.92	65.99	64.65	39
fig|11428.3.peg.3127	66.7	66.7	65.58	51.79	47.01	34
fig|11428.3.peg.2715	65.93	65.93	66.52	52.89	47.11	37
fig|11428.3.peg.2032	65.33	65.33	62.83	57.24	54.61	41
fig|11428.3.peg.2567	63.6	63.6	79.69	75.28	72.85	52
fig|11428.3.peg.4698	63.05	63.05	67	60.67	54	36
fig|11428.3.peg.1625	61.16	61.16	50.39	43.55	40.24	30
fig|11428.3.peg.4662	59.4	59.4	84.7	82.79	80.33	47
fig|11428.3.peg.2039	58.41	62.39	66.79	59.31	57.12	42
fig|1428.368.peg.3333	58.33	58.33	66.31	66.31	64.61	38
fig|11428.3.peg.5528	56.1	56.1	73.21	71.62	71.62	42
fig|11428.3.peg.70	55.5	55.5	76.87	76.49	75.37	63
fig|11428.3.peg.1964	53.95	53.95	77.72	67.59	65.82	29
fig|11428.3.peg.1897	53.31	53.31	67.06	64.26	60.74	31
fig|11428.3.peg.4018	53.3	53.31	61.17	58.33	55.87	33
fig|11428.3.peg.2830	52.43	52.43	51.34	50.52	48.45	29
fig|11428.3.peg.1959	51.96	51.96	44.64	28.01	24.11	25
fig|11428.3.peg.4664	51.87	51.87	70.61	70.19	68.71	32
fig|11428.3.peg.1498	50.34	52.27	70.89	49.91	49.73	28
fig|11428.3.peg.1596	50.31	70.53	78.46	63.57	62.17	46
fig|11428.3.peg.3438	49.98	49.98	56.78	51.41	51.41	29
fig|11428.3.peg.2474	49.19	49.19	72.67	70.04	65.18	30
fig|11428.3.peg.5677	48.88	48.88	69.5	67.97	67.97	34
fig|11428.3.peg.4171	47.26	47.26	50.47	42.19	40.45	26
fig|11428.3.peg.2733	46.46	46.46	68.22	63.78	60.22	38
fig|11428.3.peg.6139	46.37	46.37	71.15	65.93	62.09	24
fig|11428.3.peg.2955	45.24	45.24	54.98	50.89	50.89	27
fig|1428.368.peg.3335	44.93	44.93	48.8	44.02	38.84	27
fig|11428.3.peg.4957	44.68	44.68	89.34	78.43	76.65	27
fig|11428.3.peg.5201	44.43	44.43	22.6	16.26	13.11	23
fig|11428.3.peg.5056	43.74	43.74	44.39	34.55	33.04	25
fig|11428.3.peg.3379	43.58	43.58	72.99	69.19	67.3	25
fig|1428.368.peg.4584	43.57	43.57	100	100	100	33
fig|11428.3.peg.1862	43.47	43.47	63.04	57.61	50.72	27
fig|11428.3.peg.685	43.09	43.09	60.59	58.78	55.18	27
fig|11428.3.peg.2690	42.61	42.61	55.22	53.3	51.1	23
fig|11428.3.peg.1938	42.46	42.46	47.84	30.58	28.85	22
fig|11428.3.peg.4500	41.82	41.82	58.63	51.8	50.18	21
fig|11428.3.peg.787	41.63	41.63	58.69	51.77	49.65	22
fig|11428.3.peg.2212	40.72	40.72	70.61	70.61	70.61	24
fig|11428.3.peg.5908	40.6	40.6	60.85	53.16	49.91	20
fig|11428.3.peg.3233	40.5	40.5	69.1	62.5	60.38	25
fig|11428.3.peg.3234	40.37	40.37	67.29	59.11	59.11	22
fig|11428.3.peg.4506	39.63	39.63	23.34	10.57	9.196	20
fig|11428.3.peg.5223	39.57	39.57	82.46	80.92	80.92	21
fig|11428.3.peg.5409	39.48	39.48	61.59	55.27	51.76	21
fig|1428.368.peg.4721	39.46	39.46	68.69	58.18	54.21	23
fig|11428.3.peg.2315	39.19	39.19	58.11	43.53	41.48	23
fig|11428.3.peg.3958	38.94	38.94	65.81	60.04	60.04	22
fig|11428.3.peg.5686	38.93	38.94	74.44	72.67	72.44	20
fig|11428.3.peg.1454	38.34	38.34	68.03	64.48	61.75	20
fig|11428.3.peg.5764	38.14	38.14	50	38.79	35.91	22
fig|11428.3.peg.4387	37.97	37.97	57.11	47.55	43.59	21
fig|11428.3.peg.6	37.89	37.89	60	47.33	43.33	21
fig|11428.3.peg.1456	37.78	37.78	51.12	46.84	40.94	19
fig|11428.3.peg.2444	37.6	37.6	38.61	23.06	21.32	25
fig|11428.3.peg.1012	37.48	37.48	51.68	48.12	45.94	19
fig|11428.3.peg.5725	36.94	36.94	60.72	48.7	41.68	19
fig|11428.3.peg.5734	36.82	36.82	75.9	71.66	66.78	20
fig|11428.3.peg.5676	36.43	36.43	63.89	57.07	51.26	24
fig|11428.3.peg.4520	36.29	36.29	44.73	39.81	36.77	19
fig|11428.3.peg.5480	36.22	36.22	76.45	65.22	52.9	18
fig|11428.3.peg.1863	35.93	35.93	64.03	60.28	60.28	26
fig|11428.3.peg.5707	35.61	35.61	49.83	44.43	36.41	18
fig|11428.3.peg.5228	35.19	35.19	57.79	46.23	41.71	18
fig|11428.3.peg.947	34.1	34.1	44.76	40.31	37.96	19
fig|11428.3.peg.6020	34.01	34.01	61.94	54.59	54.59	19
fig|11428.3.peg.4908	33.96	33.96	51.35	44.93	44.51	20
fig|11428.3.peg.2833	33.92	33.92	45.54	33.13	28.9	16
fig|11428.3.peg.3	33.74	33.74	74.15	67.35	67.35	26
fig|11428.3.peg.5200	33.65	33.65	16.9	8.179	7.609	18
fig|11428.3.peg.2319	33.43	33.43	48.82	42.92	35.38	17
fig|11428.3.peg.6125	33.25	33.25	48.43	42.86	42.86	18
fig|11428.3.peg.268	33.18	33.18	51.76	40.43	40.43	20
fig|11428.3.peg.5675	33.09	33.09	72.67	64.53	62.79	20
fig|11428.3.peg.4505	32.7	32.7	64.59	59.44	54.72	19
fig|11428.3.peg.1617	32.55	32.55	56.05	45.35	43.95	17
fig|11428.3.peg.3993	32.37	32.37	26.31	21.57	19.2	17
fig|11428.3.peg.3387	32.17	32.17	41.8	35.86	30.99	17
fig|11428.3.peg.5500	31.55	31.55	51.77	41.92	41.92	19
fig|1428.368.peg.6367	31.01	31.01	51.37	41.21	37.5	17
fig|11428.3.peg.4550	30.89	30.9	61.74	56.17	47.46	16
fig|11428.3.peg.4325	30.73	30.73	50.81	44.08	41.76	17
fig|11428.3.peg.522	30.69	30.69	76.15	76.15	73.46	16
fig|11428.3.peg.4477	30.53	30.53	61.61	56.97	56.97	15
fig|11428.3.peg.4414	30.49	30.49	34.63	22.24	20.9	16
fig|11428.3.peg.3217	30.07	30.07	54.96	45.04	45.04	18
fig|11428.3.peg.2375	29.98	29.98	46.96	43.65	36.87	17
fig|11428.3.peg.3223	29.93	29.93	72.26	69.86	61.64	21
fig|1428.368.peg.6174	29.61	29.61	49.86	45.43	45.43	18
fig|11428.3.peg.2888	29.53	29.53	45.5	38.63	38.63	17
fig|11428.3.peg.4966	29.48	29.48	41.96	28.59	21.29	15
fig|11428.3.peg.1177	29.19	29.19	63.04	52.8	47.2	17
fig|11428.3.peg.5162	29.06	29.06	65.91	62.5	53.03	16
fig|11428.3.peg.4367	29.04	29.04	95.19	95.19	95.19	29
fig|11428.3.peg.4628	28.73	28.73	69.97	64.02	61.76	14
fig|11428.3.peg.2673	28.71	28.71	37.38	28.41	24.25	13
fig|11428.3.peg.5656	28.69	28.69	39.56	36.48	33.63	18
fig|11428.3.peg.259	28.63	28.63	65.83	63.31	60.07	14
fig|11428.3.peg.3950	28.45	28.45	68.91	61.9	61.9	17
fig|11428.3.peg.5709	28.39	28.39	37.85	29.35	29.35	19
fig|11428.3.peg.1455	28.33	28.33	45.41	45.41	43.62	16
fig|11428.3.peg.6146	28.3	28.3	83.33	76.09	76.09	14
fig|11428.3.peg.3802	28.22	28.22	46.03	39.23	32.43	15
fig|1428.368.peg.6130	28.09	28.7	57.81	51.23	49.04	14
fig|11428.3.peg.4521	27.85	27.85	69.96	56.54	54.42	20
fig|11428.3.peg.2045	27.65	32.97	41.2	31.03	27.77	17
fig|11428.3.peg.6121	27.48	27.48	72.27	69.14	69.14	15
fig|11428.3.peg.5623	27.47	27.47	62.14	56.96	56.63	18
fig|1428.368.peg.5202	27.27	27.27	39.61	26.51	24.06	14
fig|11428.3.peg.4959	27.11	27.11	44.4	34.97	31.24	14
fig|11428.3.peg.4910	27.04	27.04	41.63	38.55	33.26	13
fig|11428.3.peg.4327	26.87	26.87	41.67	35.88	33.33	13
fig|11428.3.peg.2612	26.74	26.74	49.36	44.47	44.47	16
fig|11428.3.peg.2850	26.74	26.74	49.14	43.99	43.99	14
fig|11428.3.peg.1944	26.53	26.53	41.86	35.88	32.37	14
fig|11428.3.peg.3810	26.53	26.53	60.92	44.47	42.32	15
fig|11428.3.peg.4476	26.39	26.39	70.45	51.82	48.99	15
fig|11428.3.peg.1785	26.13	26.13	38.87	33.73	31.16	15
fig|11428.3.peg.3381	26.04	26.04	45.28	39.08	39.08	19
fig|11428.3.peg.5903	26	26	45.39	43.69	43.69	16
fig|11428.3.peg.2317	25.88	25.88	65.08	55.93	53.56	18
fig|11428.3.peg.1313	25.83	25.83	64.86	52.7	51.08	14
fig|11428.3.peg.448	25.69	25.69	47.18	42.82	40.51	14
fig|11428.3.peg.2866	25.66	25.66	49.01	39.41	36.45	13
fig|11428.3.peg.4661	25.62	25.62	60.54	49.83	49.83	14
fig|11428.3.peg.2211	25.22	27.29	36.38	29.17	26.71	13
fig|11428.3.peg.4557	25.13	25.13	62.5	57.74	57.74	15
fig|11428.3.peg.4526	25.06	25.06	44.86	41.68	32.9	13
fig|11428.3.peg.3502	25.03	25.03	50.25	41.88	41.88	15
fig|11428.3.peg.2250	24.93	24.93	53.04	44.75	44.75	14
fig|11428.3.peg.5454	24.8	24.8	85.58	80.93	80.93	14
fig|11428.3.peg.3224	24.74	24.74	45.32	33.27	27.16	13
fig|11428.3.peg.108	24.72	24.72	36.77	30.37	25.93	13
fig|1428.368.peg.6151	24.7	24.7	46.05	40.7	37.21	13
fig|11428.3.peg.4268	24.65	24.65	28.68	22.82	19.45	14
fig|11428.3.peg.4995	24.63	24.63	54.34	49.23	45.66	13
fig|11428.3.peg.2074	24.6	24.6	51.52	47.73	46.21	15
fig|11428.3.peg.3380	24.59	24.59	61.23	54.15	54.15	13
fig|1428.368.peg.4585	24.56	24.56	47.44	36.61	31.1	14
fig|11428.3.peg.4829	24.4	24.4	25.08	14.82	14.82	13
fig|11428.3.peg.967	24.32	24.32	47.3	40.27	37.3	12
fig|11428.3.peg.2389	24.02	24.02	66.07	66.07	66.07	20
fig|11428.3.peg.351	23.7	23.7	49.17	45.28	43.33	12
fig|11428.3.peg.27	23.45	23.45	53.3	42.58	42.31	14
fig|11428.3.peg.5714	23.31	23.35	62.01	50.76	43.47	16
fig|1428.368.peg.5533	23.27	23.27	48.61	46.22	46.22	13
fig|11428.3.peg.2139	23.06	23.06	35.66	33.59	29.72	11
fig|1428.368.peg.4694	22.98	22.98	79.15	76.17	76.17	14
fig|11428.3.peg.5259	22.96	22.96	64.71	62.25	62.25	13
fig|11428.3.peg.5598	22.82	22.82	61.26	57.06	51.95	14
fig|11428.3.peg.3353	22.8	22.8	54.73	45.56	42.98	13
fig|11428.3.peg.5912	22.78	22.78	57.07	48.95	41.62	11
fig|11428.3.peg.3247	22.55	22.55	34.53	27.52	21.54	11
fig|11428.3.peg.3220	22.5	22.5	66.83	66.83	66.83	17
fig|1428.368.peg.3334	22.32	22.32	72.03	62.94	51.05	12
fig|11428.3.peg.614	22.32	22.32	50	43.18	34.55	11
fig|11428.3.peg.3188	22.24	22.24	26.3	22.11	20.81	11
fig|11428.3.peg.2515	22.1	22.1	49.88	42.58	38.44	11
fig|11428.3.peg.13	22.1	22.1	74.15	62.44	46.34	11
fig|11428.3.peg.4694	22.07	22.07	39.06	36.7	36.7	11
fig|11428.3.peg.5308	22.03	22.03	40.97	37.2	37.2	11
fig|1428.368.peg.2890	21.92	21.92	38.71	35.48	31.99	11
fig|1428.368.peg.3918	21.85	21.85	34.13	30.67	23.54	11
fig|11428.3.peg.1527	21.8	21.8	55.88	52.94	49.26	12
fig|1428.368.peg.3916	21.75	21.75	60.94	48.93	46.35	14
fig|11428.3.peg.4173	21.64	21.64	55.45	47.98	33.33	10
fig|11428.3.peg.137	21.25	21.25	60.65	47.44	42.86	17
fig|11428.3.peg.5914	21.2	21.2	54.81	54.81	52.88	11
fig|11428.3.peg.5125	21.15	21.15	41.39	28.99	28.99	11
fig|11428.3.peg.1274	21.04	21.04	53.25	47.73	47.73	12
fig|11428.3.peg.4245	20.95	20.95	45.45	38.84	32.51	10
fig|11428.3.peg.479	20.92	20.92	44.71	37.35	35.29	12
fig|11428.3.peg.3195	20.66	20.66	53.22	46.78	35.25	12
fig|11428.3.peg.1427	20.42	21.1	35.9	25.41	23.11	10
fig|11428.3.peg.5737	20.22	20.22	33.49	23.85	19.27	11
fig|11428.3.peg.1769	20.22	20.22	67.53	67.53	64.94	16
fig|1428.368.peg.3861	20.18	20.18	62.22	58.33	58.33	11
fig|11428.3.peg.3775	20.15	20.15	32.75	29.09	21.08	12
fig|11428.3.peg.2902	20	20	43.14	41.18	38.1	11
fig|11428.3.peg.535	19.97	19.97	36.45	24.03	20.97	10
fig|11428.3.peg.1200	19.94	19.94	44.69	31.84	28.49	11
fig|11428.3.peg.964	19.87	19.87	91.22	86.49	77.03	15
fig|11428.3.peg.2848	19.84	19.84	40.55	38.11	35.67	12
fig|11428.3.peg.5948	19.58	19.58	51.19	34.56	31.1	10
fig|11428.3.peg.1343	19.53	19.53	46.5	42.99	32.94	11
fig|11428.3.peg.2208	19.4	19.4	43.43	34.05	31.64	14
fig|11428.3.peg.5081	19.33	19.33	42.12	33.99	31.77	12
fig|11428.3.peg.5211	19.26	19.26	14.05	7.26	5.582	11
fig|11428.3.peg.5204	19.17	19.17	47.12	39.53	37.7	10
fig|11428.3.peg.1771	19.17	19.17	51.72	46.95	35.81	10
fig|11428.3.peg.4667	18.78	18.78	41	32.8	27.79	10
fig|11428.3.peg.2041	18.66	18.66	50.16	46.62	44.69	10
fig|11428.3.peg.1467	18.55	18.55	32.75	30.75	30.5	11
fig|11428.3.peg.4945	18.47	18.47	46.9	26.9	24.37	10
fig|11428.3.peg.6129	18.41	18.41	19.72	14.74	12.55	10
fig|11428.3.peg.1972	18.31	18.31	72.15	60.73	45.21	10
fig|1428.368.peg.2255	18.27	18.27	35.37	31.46	26.59	10
fig|11428.3.peg.2056	18.12	22.16	26.44	14.78	14.78	11
fig|11428.3.peg.994	18.03	18.03	39.24	37.72	32.91	9
fig|11428.3.peg.5205	17.98	17.98	31.2	29.07	23.73	10
fig|11428.3.peg.2210	17.92	17.92	38.41	34.77	34.77	12
fig|11428.3.peg.1285	17.76	17.76	41.4	35.91	35.91	9
fig|11428.3.peg.4028	17.75	17.75	52.04	40.89	38.66	9
fig|11428.3.peg.2860	17.71	17.71	41.45	37.68	33.62	9
fig|11428.3.peg.5022	17.46	17.46	24.87	19.12	19.12	10
fig|11428.3.peg.1754	17.45	17.45	22.05	13.64	11.82	9
fig|11428.3.peg.4017	17.22	17.22	43.86	28.07	26.07	10
fig|11428.3.peg.5000	17.22	17.22	43.46	29.74	29.74	9
fig|1428.368.peg.6144	17.18	17.18	42.63	38.24	38.24	12
fig|11428.3.peg.4424	17.18	17.18	49.69	39.44	39.44	9
fig|11428.3.peg.958	17.12	17.12	31.3	21.95	21.95	12
fig|11428.3.peg.2071	17.06	17.06	28.62	19.84	18.05	10
fig|11428.3.peg.6026	16.95	16.95	19.97	17.65	17.65	9
fig|11428.3.peg.2099	16.92	16.92	27.76	25.88	20.24	9
fig|11428.3.peg.5753	16.9	16.9	38.78	21.57	21.57	10
fig|11428.3.peg.3463	16.81	16.81	36.49	25.09	18.07	9
fig|11428.3.peg.2549	16.66	16.66	48.39	39.3	33.14	9
fig|11428.3.peg.4484	16.38	16.38	45.51	34.94	32.69	8
fig|11428.3.peg.1530	16.24	16.24	29.53	24.09	24.09	11
fig|11428.3.peg.1107	16.2	16.2	50.18	41.7	39.22	8
fig|11428.3.peg.1679	16.13	16.13	32.95	32.38	26.93	8
fig|11428.3.peg.5136	16.09	16.09	25.82	18.25	16.91	9
fig|11428.3.peg.2684	16.07	16.07	40.76	35.99	32.48	9
fig|11428.3.peg.638	16	16	33.5	23.6	23.6	8
fig|11428.3.peg.3927	16	16	20.2	13.47	13.47	8
fig|11428.3.peg.3209	16	16	17.93	14.72	14.72	8
fig|11428.3.peg.2051	15.97	15.97	45.48	35.81	31.94	8
fig|11428.3.peg.3643	15.97	15.97	49.8	49.8	39.18	9
fig|11428.3.peg.1987	15.94	15.94	62.96	52.31	43.98	9
fig|11428.3.peg.3528	15.89	15.89	60.78	59.48	59.48	10
fig|11428.3.peg.4103	15.87	15.87	60.56	57.02	19.2	11
fig|11428.3.peg.1111	15.85	15.85	44.66	31.23	28.22	9
fig|11428.3.peg.1137	15.83	15.83	45.02	38.83	33.33	9
fig|11428.3.peg.2889	15.76	15.76	52.17	40.8	37.46	9
fig|11428.3.peg.3042	15.7	15.7	48.48	39.39	35.69	10
fig|11428.3.peg.4494	15.55	15.55	49.09	32.73	30.18	9
fig|11428.3.peg.6123	15.42	15.42	48.61	40.28	40.28	9
fig|11428.3.peg.5953	15.39	15.39	31.06	17.28	17.28	8
fig|11428.3.peg.1288	15.34	15.34	49.41	41.96	38.04	9
fig|11428.3.peg.3776	15.34	15.34	45.17	43.45	34.14	8
fig|11428.3.peg.5077	15.32	15.32	54.07	46.67	38.15	9
fig|11428.3.peg.4228	15.29	15.29	37.08	31.78	28.18	15
fig|1428.368.peg.4752	15.29	15.29	75.29	54.12	54.12	9
fig|11428.3.peg.1209	15.12	15.12	20.55	18.87	17.35	9
fig|11428.3.peg.2042	15.1	15.1	33.72	31.99	29.97	8
fig|11428.3.peg.3858	14.77	15.48	39.31	25.79	23.58	8
fig|11428.3.peg.1403	14.68	14.68	35.6	27.72	25.82	8
fig|11428.3.peg.5221	14.61	14.61	48.45	44.96	42.25	9
fig|11428.3.peg.3391	14.54	14.54	36.67	35	27.5	7
fig|11428.3.peg.4149	14.48	14.48	29.17	23.38	21.3	8
fig|11428.3.peg.4697	14.42	14.42	27.01	21.21	17.41	7
fig|11428.3.peg.452	14.32	14.32	33.41	19.43	19.43	8
fig|11428.3.peg.3829	14.1	14.1	24.31	12.69	12.69	8
fig|11428.3.peg.6021	14.03	14.03	35.96	20.9	20.9	8
fig|11428.3.peg.4558	14.02	14.02	44.44	44.44	39.44	7
fig|11428.3.peg.481	14.01	14.01	18.34	12.94	12.94	8
fig|11428.3.peg.1514	14.01	14.01	86.39	84.35	84.35	9
fig|11428.3.peg.2014	14	14	33.19	29.69	29.69	9
fig|11428.3.peg.5224	14	14	63.46	63.46	63.46	8
fig|11428.3.peg.3229	13.91	13.91	44.88	27.98	27.98	8
fig|11428.3.peg.5597	13.77	13.77	36.54	23.23	23.23	8
fig|11428.3.peg.612	13.76	13.76	44.93	39.13	33.7	9
fig|1428.368.peg.4245	13.61	13.61	21.97	21.97	21.97	8
fig|11428.3.peg.960	13.6	13.6	54.5	43.39	43.39	8
fig|11428.3.peg.1861	13.57	13.57	28.37	22.93	20.57	10
fig|1428.368.peg.5224	13.49	13.49	69.49	51.69	51.69	10
fig|11428.3.peg.524	13.45	13.45	26.73	17.12	16.92	7
fig|1428.368.peg.4628	13.44	13.44	33.1	32.74	29.18	7
fig|11428.3.peg.1655	13.44	13.44	23.63	17.18	17.18	7
fig|11428.3.peg.2989	13.4	13.4	18.2	10.36	10.36	7
fig|11428.3.peg.3861	13.36	13.36	33.45	26.96	26.96	7
fig|11428.3.peg.1208	13.35	13.35	32.16	24.95	17.38	7
fig|11428.3.peg.6025	13.29	13.29	29.43	22.61	13.45	6
fig|1428.368.peg.5950	13.19	13.19	64.33	50.32	50.32	8
fig|1428.368.peg.6295	13.17	13.17	37.9	26.75	24.2	7
fig|11428.3.peg.3457	13.05	13.05	32.88	27.05	27.05	7
fig|11428.3.peg.2050	13.03	13.03	25.73	23.54	21.84	8
fig|11428.3.peg.5179	13.02	13.02	28.85	28.52	28.52	7
fig|11428.3.peg.2316	12.78	12.78	29	21.92	21.92	7
fig|11428.3.peg.2	12.57	12.57	29.66	19.36	15.44	6
fig|11428.3.peg.3365	12.55	12.55	24.92	16.78	16.78	9
fig|11428.3.peg.1891	12.51	12.51	28.74	26.15	26.15	10
fig|11428.3.peg.571	12.46	12.46	17.33	15.24	15.24	8
fig|11428.3.peg.3500	12.33	12.33	29.49	22.58	20.97	7
fig|11428.3.peg.1956	12.2	12.2	80.67	64.71	42.86	7
fig|11428.3.peg.3191	12.19	12.2	54.44	35	35	10
fig|11428.3.peg.223	12.17	12.17	29.9	29.55	26.8	7
fig|11428.3.peg.3196	12.14	12.14	49.17	45.42	42.08	6
fig|1428.368.peg.6172	12.13	12.13	41.53	41.53	31.36	6
fig|11428.3.peg.5173	12.1	12.1	45.5	35.59	31.08	7
fig|11428.3.peg.1469	12.1	12.1	32.95	29.55	29.55	7
fig|11428.3.peg.5229	12.03	12.03	52.17	38.34	38.34	7
fig|1428.368.peg.2904	12.03	12.03	31.5	25.08	25.08	6
fig|11428.3.peg.447	12.01	12.01	31.13	18.55	18.55	6
fig|11428.3.peg.3043	12	16	61.26	50.9	50.9	8
fig|11428.3.peg.2160	12	12	28.67	15.75	15.75	6
fig|11428.3.peg.4218	12	12	43.23	35.94	35.94	6
fig|1428.368.peg.6102	12	12	54.22	50	50	8
fig|11428.3.peg.1407	12	12	49.26	49.26	49.26	6
fig|11428.3.peg.5057	11.89	11.89	25.38	16.92	16.92	6
fig|11428.3.peg.5622	11.85	11.85	33.94	29.41	29.41	10
fig|11428.3.peg.1080	11.74	11.74	20.92	14.66	13.34	7
fig|1428.368.peg.6319	11.68	11.68	52.54	38.77	33.7	7
fig|11428.3.peg.3202	11.59	11.59	29.19	23.68	19.38	6
fig|11428.3.peg.1205	11.56	11.56	23.38	16.1	12.99	6
fig|11428.3.peg.6126	11.51	11.51	32.44	27.38	22.02	6
fig|1428.368.peg.6066	11.5	11.5	37.95	31.63	23.49	7
fig|11428.3.peg.3553	11.45	11.45	39.73	28.42	24.66	6
fig|11428.3.peg.1168	11.43	11.43	29.6	23.38	17.91	6
fig|1428.368.peg.4545	11.42	11.42	27.24	27.24	20.62	8
fig|1428.368.peg.3929	11.39	11.39	66.67	39.47	38.6	6
fig|1428.368.peg.3917	11.32	11.32	34.75	33.98	30.89	6
fig|11428.3.peg.3501	11.28	11.28	42.86	35.9	35.9	9
fig|1428.368.peg.3417	11.26	11.26	40.14	40.14	40.14	7
fig|11428.3.peg.4642	11.18	11.18	35.19	35.19	35.19	6
fig|11428.3.peg.1294	11.17	11.17	22.37	17.42	16.13	6
fig|11428.3.peg.5991	11.09	11.09	35.29	25.49	22.41	6
fig|11428.3.peg.2270	11.08	11.08	27.81	20.81	11.25	6
fig|1428.368.peg.3570	11.06	11.06	67.42	58.43	58.43	7
fig|11428.3.peg.457	11.03	11.03	39.17	26.11	18.4	7
fig|11428.3.peg.3470	11.02	11.03	30	18.95	15.53	6
fig|11428.3.peg.105	11	11	26.21	19.08	13.84	5
fig|11428.3.peg.4928	10.97	10.97	23.17	15.55	11.96	6
fig|11428.3.peg.4422	10.9	10.9	31.29	22.58	22.58	6
fig|11428.3.peg.5947	10.75	10.75	16.75	10.92	8.313	6
fig|11428.3.peg.4034	10.74	10.74	42.09	38.21	31.64	7
fig|11428.3.peg.1558	10.74	10.74	33.24	19.89	19.89	6
fig|11428.3.peg.4544	10.66	10.66	44.33	40.39	40.39	7
fig|11428.3.peg.4956	10.61	10.61	35.63	25.75	23.65	7
fig|11428.3.peg.3399	10.49	10.49	53.09	40.74	37.04	7
fig|11428.3.peg.3248	10.44	10.44	43.75	32.64	26.39	6
fig|11428.3.peg.3929	10.43	10.43	51.72	51.72	43.1	5
fig|11428.3.peg.981	10.42	10.42	46.62	34.96	23.68	7
fig|11428.3.peg.2711	10.42	10.42	38.3	33.13	27.66	5
fig|11428.3.peg.4279	10.41	10.51	32.72	25.74	23.53	5
fig|11428.3.peg.615	10.4	10.4	23.35	15.23	10.15	5
fig|11428.3.peg.5522	10.37	10.37	17.49	14.18	14.18	7
fig|11428.3.peg.1992	10.28	10.28	48.84	48.06	31.01	6
fig|11428.3.peg.4048	10.18	10.18	42.25	42.25	29.41	5
fig|11428.3.peg.4219	10.01	10.01	42.27	35.05	35.05	5
fig|11428.3.peg.1860	10.01	10.01	28.48	21.05	21.05	6
fig|1428.368.peg.6120	10	30	49.6	49.6	49.6	21
fig|1428.368.peg.3552	10	10	22.73	19.09	19.09	5
fig|1428.368.peg.2804	10	10	30.21	21.53	21.53	5
fig|11428.3.peg.5674	9.98	9.98	39.46	19.88	19.88	6
fig|11428.3.peg.2776	9.76	9.76	34.64	23.1	17.94	5
fig|11428.3.peg.2012	9.75	9.75	42.92	22.57	22.57	5
fig|11428.3.peg.5182	9.64	9.64	53.52	31.92	31.92	6
fig|11428.3.peg.1740	9.6	9.6	18.27	11.17	11.17	6
fig|11428.3.peg.1855	9.59	9.59	22.44	19.23	19.23	5
fig|1428.368.peg.3374	9.58	9.58	17.92	9.815	8.677	5
fig|11428.3.peg.3243	9.42	9.42	37.88	20.58	11.15	5
fig|11428.3.peg.3384	9.37	9.37	54.89	46.74	46.74	6
fig|1428.368.peg.4921	9.27	9.27	27.05	20.67	17.63	5
fig|11428.3.peg.5245	9.26	9.26	34.53	25.11	25.11	5
fig|11428.3.peg.6079	9.23	9.23	23.48	17.38	17.38	5
fig|11428.3.peg.998	9.1	9.1	22.93	12.64	9.732	5
fig|11428.3.peg.5682	8.99	8.99	39.7	36.18	32.66	6
fig|11428.3.peg.6073	8.93	8.93	31.13	22.33	16.67	5
fig|1428.368.peg.4971	8.81	8.81	61.63	46.51	46.51	5
fig|1428.368.peg.4134	8.78	8.78	47.92	36.81	31.25	5
fig|11428.3.peg.3347	8.76	8.76	69.42	52.89	52.89	5
fig|11428.3.peg.3230	8.58	8.58	22.16	13.33	9.608	4
fig|11428.3.peg.833	8.55	8.55	34.78	30.98	30.43	5
fig|11428.3.peg.1064	8.51	8.51	22.94	19.48	15.58	5
fig|11428.3.peg.822	8.49	8.49	26.22	18.25	13.62	4
fig|11428.3.peg.1476	8.46	8.46	31.5	31.5	30.71	4
fig|11428.3.peg.2761	8.42	8.42	27.78	18.29	14.58	4
fig|11428.3.peg.181	8.35	8.35	49.71	49.12	49.12	5
fig|11428.3.peg.350	8.29	8.29	32.82	20.26	20.26	5
fig|11428.3.peg.2204	8.28	8.28	18.99	11.9	9.375	5
fig|11428.3.peg.4234	8.28	8.28	47.06	38.24	34.12	8
fig|11428.3.peg.3165	8.28	8.28	16.49	13.26	12.01	5
fig|11428.3.peg.5249	8.19	8.19	39.59	31.43	24.9	5
fig|11428.3.peg.3262	8.17	8.17	46.18	24.31	15.63	4
fig|11428.3.peg.1153	8.14	8.14	23.72	15.36	15.36	5
fig|11428.3.peg.659	8.13	8.13	39.71	30.88	30.88	6
fig|11428.3.peg.543	8.08	8.08	28.92	14.81	10.76	5
fig|11428.3.peg.3169	8.07	8.07	26.11	23.57	20.7	5
fig|11428.3.peg.4905	8.06	8.06	19.32	19.32	13.94	4
fig|11428.3.peg.2169	8.04	8.04	60.32	42.86	42.86	4
fig|11428.3.peg.2237	8.03	8.03	26.2	15.62	15.62	6
fig|11428.3.peg.1954	8.02	8.02	35.65	25.22	25.22	4
fig|11428.3.peg.303	8.02	8.02	45.56	28.4	28.4	4
fig|1428.368.peg.5479	8	8	37.78	27.78	27.78	4
fig|11428.3.peg.3722	8	8	27.91	16.61	16.61	4
fig|11428.3.peg.2106	8	8	29.71	13.39	13.39	5
fig|11428.3.peg.1705	8	8	45	35.62	35.62	4
fig|1428.368.peg.3416	8	8	50	40.71	40.71	6
fig|11428.3.peg.598	8	8	23.17	17.07	17.07	5
fig|11428.3.peg.2517	8	8	31.43	22.86	22.86	4
fig|11428.3.peg.2886	8	8	30.6	28.02	28.02	4
fig|11428.3.peg.136	8	8	41.08	31.35	31.35	4
fig|1428.368.peg.3996	7.97	7.97	20.57	14.58	14.58	4
fig|11428.3.peg.289	7.89	7.89	52.52	48.92	48.92	5
fig|1428.368.peg.4320	7.74	7.74	26.82	23.18	23.18	5
fig|11428.3.peg.1116	7.71	7.71	27.79	15.76	11.75	4
fig|11428.3.peg.3460	7.62	7.62	22.93	22.93	22.93	5
fig|11428.3.peg.917	7.57	7.57	28.29	25	18.42	4
fig|11428.3.peg.4531	7.56	7.56	22.74	14.95	14.95	4
fig|11428.3.peg.1038	7.54	7.54	16.5	11.26	11.26	6
fig|11428.3.peg.2115	7.42	7.42	29.61	18.45	18.45	6
fig|11428.3.peg.2018	7.41	7.41	25.2	18.8	18.8	4
fig|1428.368.peg.4238	7.39	7.39	27.66	16.6	16.6	5
fig|11428.3.peg.2010	7.39	7.39	30.94	17.13	17.13	4
fig|11428.3.peg.4174	7.33	7.33	23	15.5	11.14	5
fig|11428.3.peg.5523	7.3	7.3	25.46	18.69	17.04	6
fig|11428.3.peg.4673	7.29	7.3	32.05	24.71	21.24	4
fig|11428.3.peg.5080	7.28	7.28	21.4	10.93	8.837	4
fig|11428.3.peg.2953	7.26	7.26	36.76	15.42	11.31	4
fig|11428.3.peg.3539	7.24	7.24	12.1	7.261	7.261	4
fig|1428.368.peg.4740	7.24	7.24	40	34.44	34.44	4
fig|11428.3.peg.5850	7.22	7.22	22.16	13.45	9.659	4
fig|11428.3.peg.1813	7.22	7.22	29.82	18.55	18.55	5
fig|11428.3.peg.1290	7.15	7.15	30.42	16.73	16.73	5
fig|11428.3.peg.1732	7.1	7.1	19.36	8.621	8.621	4
fig|11428.3.peg.2173	7.1	7.1	36.68	22.01	15.83	4
fig|11428.3.peg.2844	7.03	7.03	44.81	44.81	44.81	4
fig|11428.3.peg.3028	6.98	6.98	47.47	26.58	26.58	4
fig|11428.3.peg.5424	6.95	6.95	29.94	17.52	15.29	4
fig|11428.3.peg.4289	6.92	6.92	20.71	16.08	16.08	5
fig|11428.3.peg.1978	6.89	6.89	56.98	35.75	31.84	4
fig|11428.3.peg.4936	6.84	6.84	19.57	12.13	12.13	5
fig|11428.3.peg.1828	6.82	26.08	68.49	62.61	59.66	13
fig|11428.3.peg.3206	6.82	6.82	26.9	19.29	17.12	4
fig|11428.3.peg.211	6.82	6.82	49.41	40	40	4
fig|1428.368.peg.6143	6.78	6.78	37.35	15.74	15.74	4
fig|11428.3.peg.5892	6.76	6.76	23.79	23.79	23.79	5
fig|11428.3.peg.5488	6.72	6.72	30.38	7.595	7.595	4
fig|11428.3.peg.4215	6.72	6.72	32.5	14.72	14.72	4
fig|11428.3.peg.3816	6.71	6.71	27.1	15.13	11.13	4
fig|11428.3.peg.1670	6.71	6.71	35.03	24.37	24.37	4
fig|11428.3.peg.2464	6.67	6.67	47.03	39.46	39.46	4
fig|11428.3.peg.4471	6.66	6.66	15.09	10.7	8.772	4
fig|11428.3.peg.5931	6.65	6.65	23.1	6.512	6.512	4
fig|11428.3.peg.4720	6.64	8.44	37.73	13	7.692	4
fig|11428.3.peg.1829	6.61	6.61	29.92	15.09	14.56	4
fig|11428.3.peg.1607	6.57	6.57	14.87	6.815	6.815	4
fig|11428.3.peg.3853	6.55	6.55	28.48	15.21	15.21	4
fig|11428.3.peg.845	6.54	6.54	24.83	17.45	12.42	3
fig|11428.3.peg.5626	6.52	6.52	34.84	23.77	23.77	4
fig|11428.3.peg.2121	6.5	6.5	23.05	15.89	15.89	4
fig|11428.3.peg.1279	6.5	6.5	54.32	54.32	49.38	4
fig|11428.3.peg.258	6.49	6.49	17.77	10.02	10.02	4
fig|11428.3.peg.2763	6.48	6.48	19.35	12.39	12.39	5
fig|11428.3.peg.5861	6.46	6.46	50	29.5	19	4
fig|11428.3.peg.3352	6.45	6.46	17.42	7.742	7.742	3
fig|11428.3.peg.4523	6.35	6.35	32.45	16.36	11.61	3
fig|11428.3.peg.2009	6.35	6.35	18.89	18.89	12.69	3
fig|11428.3.peg.2661	6.33	6.33	31.18	26.47	26.47	5
fig|11428.3.peg.2332	6.25	6.25	24.76	17.26	12.05	4
fig|11428.3.peg.1826	6.22	6.22	35.11	23.4	18.09	3
fig|11428.3.peg.2407	6.21	6.21	31.63	18.71	15.31	3
fig|11428.3.peg.3462	6.2	6.2	31.4	31.4	24.79	3
fig|1428.368.peg.5590	6.16	6.16	42.47	31.51	27.4	3
fig|11428.3.peg.3865	6.15	6.15	41.97	21.24	21.24	4
fig|11428.3.peg.2712	6.07	6.07	17.02	10.49	8.625	3
fig|11428.3.peg.2709	6.03	6.03	29.77	13.92	13.92	3
fig|11428.3.peg.5198	6.02	6.03	37.11	25.79	25.79	3
fig|11428.3.peg.654	6.02	6.02	30.43	17.39	17.39	5
fig|11428.3.peg.3551	6.01	6.01	21.45	15.14	15.14	3
fig|11428.3.peg.1914	6.01	6.01	26.12	15.67	15.67	3
fig|11428.3.peg.1727	6.01	6.01	51.16	48.84	48.84	4
fig|11428.3.peg.4561	6	39.37	77.11	77.11	77.11	27
fig|11428.3.peg.5191	6	6.28	45.61	33.92	33.92	4
fig|11428.3.peg.5576	6	6.01	24.13	18.18	18.18	3
fig|11428.3.peg.4999	6	6	27.24	13.62	13.62	3
fig|11428.3.peg.3186	6	6	30.67	17.67	17.67	3
fig|11428.3.peg.568	6	6	29.81	16.6	16.6	3
fig|1428.368.peg.4003	6	6	12.67	8.222	8.222	3
fig|11428.3.peg.2660	6	6	37.34	25.32	25.32	5
fig|11428.3.peg.4965	6	6	19.84	15.79	15.79	3
fig|11428.3.peg.3742	6	6	16.45	13.82	13.82	3
fig|11428.3.peg.2554	6	6	31.21	26.24	26.24	4
fig|11428.3.peg.3755	6	6	13.51	13.51	13.51	8
fig|11428.3.peg.1663	6	6	11.69	11.69	11.69	3
fig|11428.3.peg.81	5.95	5.95	20.98	11.8	11.8	3
fig|11428.3.peg.4211	5.92	5.92	58.48	32.16	32.16	3
fig|11428.3.peg.5299	5.92	5.92	24.05	14.77	14.77	3
fig|11428.3.peg.2867	5.9	5.9	29.43	20.57	13.02	4
fig|11428.3.peg.212	5.82	5.82	17.5	17.5	13.75	3
fig|11428.3.peg.5562	5.8	5.8	60.09	31.39	27.8	4
fig|11428.3.peg.2584	5.8	5.8	56.8	35.2	30.4	3
fig|11428.3.peg.4175	5.75	5.75	19.65	12.45	10.7	4
fig|1428.368.peg.4753	5.75	5.75	25.45	14.73	14.73	3
fig|11428.3.peg.4179	5.66	5.66	13.2	9	8.4	3
fig|11428.3.peg.3573	5.64	5.64	50.3	27.81	27.81	4
fig|11428.3.peg.3240	5.56	5.56	17.96	10.68	8.01	3
fig|11428.3.peg.2936	5.55	5.55	16.14	6.357	4.319	4
fig|11428.3.peg.2742	5.55	5.55	28.69	18.03	11.48	3
fig|1428.368.peg.6298	5.46	5.46	56.76	56.76	56.76	4
fig|11428.3.peg.4319	5.43	5.43	39.56	18.67	18.67	3
fig|11428.3.peg.3056	5.42	5.43	31.5	22.05	17.72	4
fig|1428.368.peg.6305	5.4	5.4	42.17	34.34	27.71	4
fig|11428.3.peg.4249	5.37	5.37	24.43	24.43	24.43	8
fig|11428.3.peg.6028	5.35	5.35	44.07	33.05	33.05	4
fig|11428.3.peg.2236	5.3	5.3	24.14	24.14	24.14	4
fig|1428.368.peg.4479	5.2	5.2	41.18	41.18	31.37	3
fig|11428.3.peg.213	5.17	5.17	11.16	6.867	6.867	3
fig|11428.3.peg.5078	5.16	6.4	36.57	25	21.27	5
fig|1428.368.peg.3913	5.15	5.15	40	22.7	18.38	3
fig|11428.3.peg.2884	5.15	5.15	22.49	16.47	13.25	3
fig|1428.368.peg.3360	5.14	5.14	15.13	9.456	9.456	3
fig|1428.368.peg.5668	4.99	4.99	23.49	10.74	10.74	3
fig|11428.3.peg.4447	4.91	4.91	23.28	12.79	12.79	3
fig|11428.3.peg.2100	4.9	4.9	19.47	11.72	9.83	3
fig|11428.3.peg.1991	4.88	4.88	45.45	33.06	25.62	3
fig|11428.3.peg.3147	4.87	4.87	12.46	7.166	5.954	3
fig|11428.3.peg.1703	4.82	4.82	45.98	22.99	22.99	4
fig|11428.3.peg.3015	4.75	4.75	20	17.09	14.18	3
fig|11428.3.peg.6122	4.73	4.73	36.71	9.79	9.79	3
fig|11428.3.peg.5175	4.71	4.71	55.62	33.73	26.63	3
fig|11428.3.peg.476	4.66	4.66	20.26	10.89	10.89	4
fig|11428.3.peg.4527	4.62	4.62	42.53	28.74	23.56	3
fig|1428.368.peg.6322	4.61	4.61	34.29	17.62	17.62	3
fig|1428.368.peg.3122	4.6	4.6	22.08	15.14	11.99	3
fig|1428.368.peg.6136	4.59	4.59	22.73	16.76	9.375	3
fig|11428.3.peg.1507	4.59	4.59	17.67	12.33	9	3
fig|11428.3.peg.71	4.58	4.58	61.11	61.11	61.11	4
fig|11428.3.peg.5310	4.56	4.56	22.65	18.78	9.392	3
fig|1428.368.peg.6385	4.55	4.55	34.17	25	25	3
fig|11428.3.peg.5183	4.51	4.51	33.05	12.07	8.621	3
fig|11428.3.peg.5791	4.44	28.45	46.7	40.11	35.44	15
fig|11428.3.peg.3476	4.44	4.44	53.79	42.07	42.07	3
fig|11428.3.peg.6024	4.4	4.4	23.66	15.65	11.83	3
fig|11428.3.peg.1941	4.4	4.4	16.26	8.401	4.336	3
fig|1428.368.peg.6343	4.38	4.38	17.42	9.677	9.677	4
fig|1428.368.peg.3939	4.38	4.38	51.95	46.75	46.75	3
fig|11428.3.peg.4177	4.36	4.36	41.35	29.32	14.29	2
fig|11428.3.peg.3001	4.35	4.35	23.94	13.83	7.979	2
fig|11428.3.peg.3743	4.33	4.33	37.5	12.5	7.143	2
fig|11428.3.peg.4208	4.29	4.29	14.51	7.644	7.644	4
fig|11428.3.peg.135	4.27	4.27	52.78	37.96	30.56	2
fig|1428.368.peg.1738	4.27	4.27	50	40.91	40.91	2
fig|1428.368.peg.4398	4.25	4.25	22.59	11.7	10.06	4
fig|11428.3.peg.6124	4.24	4.24	24.05	14.08	7.331	2
fig|11428.3.peg.3614	4.22	4.22	21.97	9.249	7.322	3
fig|11428.3.peg.4166	4.22	4.22	20.48	14.89	14.89	4
fig|11428.3.peg.4932	4.22	4.22	52.8	40.8	33.6	2
fig|11428.3.peg.2076	4.22	4.22	20.07	14.05	11.04	2
fig|11428.3.peg.4973	4.21	4.22	22.41	10.1	7.635	2
fig|11428.3.peg.2504	4.19	4.19	26.64	17.03	13.1	2
fig|1428.368.peg.4962	4.18	4.18	25	12.11	8.984	2
fig|1428.368.peg.5256	4.18	4.18	40.63	33.33	25	2
fig|1428.368.peg.5351	4.16	4.16	25	17.01	13.92	4
fig|11428.3.peg.893	4.16	4.16	22.18	15.49	7.394	2
fig|11428.3.peg.871	4.14	4.14	19.58	10.85	7.937	3
fig|1428.368.peg.6288	4.14	4.14	34.62	21.54	13.85	2
fig|11428.3.peg.1501	4.13	4.13	29.86	13.62	10.72	2
fig|11428.3.peg.5505	4.11	4.11	35.71	15.84	8.075	2
fig|1428.368.peg.2141	4.11	4.11	18.71	7.183	4.915	2
fig|11428.3.peg.1937	4.1	4.11	19.21	12.99	7.91	2
fig|1428.368.peg.5901	4.08	4.08	13.85	13.42	13.42	3
fig|11428.3.peg.346	4.08	4.08	37.4	30.53	30.53	2
fig|1428.368.peg.3797	4.07	4.07	50	41.89	32.43	2
fig|1428.368.peg.6162	4.06	4.06	19.3	12.87	9.942	2
fig|11428.3.peg.6012	4.05	4.05	22.12	11.22	8.013	2
fig|11428.3.peg.1346	4.05	4.05	31.5	21	14.5	2
fig|11428.3.peg.2648	4.04	4.04	54.26	35.11	26.6	2
fig|11428.3.peg.6102	4.04	4.04	27.01	26.28	18.98	2
fig|1428.368.peg.3890	4.03	4.03	17.24	6.609	6.609	2
fig|11428.3.peg.5839	4.03	4.03	18.05	10.83	7.942	2
fig|11428.3.peg.4969	4.03	4.03	15.09	3.846	3.846	2
fig|1428.368.peg.6171	4.03	4.03	51.52	36.36	34.85	2
fig|11428.3.peg.5749	4.02	4.02	11.65	2.551	2.551	2
fig|11428.3.peg.5690	4.02	4.02	25.45	24.85	18.18	2
fig|11428.3.peg.3527	4.01	4.01	25.19	3.275	3.275	2
fig|11428.3.peg.731	4.01	4.01	20.73	6.162	6.162	2
fig|1428.368.peg.6308	4.01	4.01	29.55	18.18	18.18	2
fig|11428.3.peg.307	4.01	4.01	19.7	8.978	8.978	2
fig|11428.3.peg.651	4	5.07	18.41	9.066	9.066	3
fig|11428.3.peg.178	4	4.01	12.32	8.099	8.099	2
fig|1428.368.peg.4705	4	4	14.79	4.806	4.806	2
fig|1428.368.peg.5663	4	4	13.98	5.591	5.591	2
fig|11428.3.peg.5782	4	4	20.87	7.174	7.174	2
fig|11428.3.peg.3945	4	4	49.15	17.8	17.8	2
fig|11428.3.peg.1287	4	4	21.99	7.918	7.918	2
fig|11428.3.peg.2520	4	4	13.86	5.693	5.693	2
fig|1428.368.peg.4487	4	4	14.16	7.08	7.08	2
fig|11428.3.peg.3146	4	4	10.02	5.272	5.272	2
fig|11428.3.peg.1858	4	4	17.87	10.67	10.67	2
fig|1428.368.peg.5437	4	4	15.29	6.688	6.688	2
fig|1428.368.peg.4258	4	4	13.73	8.627	8.627	3
fig|1428.368.peg.3886	4	4	21.29	18.07	11.65	2
fig|1428.368.peg.3348	4	4	30.91	19.39	19.39	2
fig|11428.3.peg.5230	4	4	29.73	18.24	18.24	2
fig|11428.3.peg.4779	4	4	24.09	14.55	14.55	2
fig|11428.3.peg.4549	4	4	18.88	12.24	12.24	2
fig|1428.368.peg.4758	4	4	24.34	20.35	20.35	3
fig|1428.368.peg.4136	4	4	44.12	36.76	36.76	2
fig|1428.368.peg.2676	4	4	13.04	8.696	8.696	2
fig|11428.3.peg.6114	4	4	27.78	18.89	18.89	2
fig|11428.3.peg.5209	4	4	9.824	6.045	6.045	2
fig|11428.3.peg.3302	4	4	13.11	10.25	10.25	2
fig|11428.3.peg.1649	4	4	37.86	33.57	33.57	2
fig|1428.368.peg.6078	4	4	12.62	12.62	12.62	2
fig|1428.368.peg.5192	4	4	25	25	25	4
fig|1428.368.peg.3867	4	4	43.02	43.02	43.02	2
fig|11428.3.peg.839	4	4	29.84	29.84	29.84	2
fig|11428.3.peg.644	4	4	26.49	26.49	26.49	2
fig|11428.3.peg.56	4	4	14.8	14.8	14.8	2
fig|11428.3.peg.5280	4	4	14.88	14.88	14.88	2
fig|11428.3.peg.1006	4	4	43.51	43.51	43.51	2
fig|11428.3.peg.1204	3.9	3.9	16.08	9.091	6.294	2
fig|11428.3.peg.3835	3.84	3.92	22.22	9.764	7.744	2
fig|11428.3.peg.1854	3.83	3.83	27.72	12.38	12.38	2
fig|1428.368.peg.2907	3.77	3.77	19.62	7.084	7.084	2
fig|1428.368.peg.4296	3.77	3.77	15.02	8.696	6.522	2
fig|11428.3.peg.3139	3.77	3.77	15.13	15.13	10.5	2
fig|11428.3.peg.4522	3.75	3.75	16.49	8.511	6.117	2
fig|1428.368.peg.6219	3.74	3.74	28.09	15.12	7.716	3
fig|11428.3.peg.1554	3.73	3.73	20.9	16.12	16.12	4
fig|1428.368.peg.3921	3.72	3.72	14.06	9.217	9.217	3
fig|11428.3.peg.4272	3.7	3.7	28.46	20	13.08	3
fig|1428.368.peg.6313	3.69	3.7	25.29	25.29	25.29	3
fig|11428.3.peg.39	3.68	3.68	35.71	15.48	15.48	2
fig|1428.368.peg.1351	3.65	3.65	34.08	20.18	15.7	3
fig|1428.368.peg.4754	3.64	3.64	25.1	11.76	11.76	2
fig|11428.3.peg.1397	3.61	3.61	26.51	13.42	13.42	3
fig|11428.3.peg.2193	3.59	3.59	69.44	69.44	50	3
fig|1428.368.peg.6327	3.54	3.54	22.14	13.57	13.57	2
fig|11428.3.peg.4423	3.54	3.54	10.03	8.091	8.091	2
fig|11428.3.peg.1419	3.52	3.52	15.6	9.174	5.81	2
fig|11428.3.peg.541	3.48	3.48	11.78	9.266	4.44	2
fig|11428.3.peg.3616	3.45	3.45	16.39	9.602	7.963	3
fig|11428.3.peg.1478	3.44	3.44	25.58	19.07	15.81	3
fig|11428.3.peg.4563	3.44	3.44	33.08	27.82	22.56	2
fig|1428.368.peg.1048	3.42	36.65	59.4	41.42	39.78	52
fig|1428.368.peg.6300	3.42	3.42	41.53	21.37	18.15	3
fig|1428.368.peg.4818	3.39	3.39	22.7	11.21	8.908	3
fig|11428.3.peg.1609	3.34	3.34	39.42	20.44	20.44	2
fig|11428.3.peg.3554	3.32	3.35	21.36	18.18	15.45	2
fig|1428.368.peg.421	3.31	3.31	20	15.9	10.26	2
fig|1428.368.peg.5573	3.26	3.26	15.07	15.07	13.7	2
fig|11428.3.peg.1295	3.25	3.25	5.96	5.96	5.96	2
fig|11428.3.peg.1085	3.23	3.23	24.39	24.39	19.51	2
fig|11428.3.peg.2945	3.19	3.19	19.2	12.07	7.121	2
fig|11428.3.peg.2287	3.18	3.18	17.01	11.46	11.46	2
fig|1428.368.peg.4152	3.16	3.16	6.607	6.607	6.607	2
fig|11428.3.peg.1091	3.12	3.12	19.49	12.27	7.22	2
fig|11428.3.peg.898	3.07	3.07	21.39	7.463	7.463	3
fig|11428.3.peg.5473	3.03	3.03	12.68	5.074	5.074	2
fig|11428.3.peg.311	3.03	3.03	33.33	17.42	17.42	2
fig|11428.3.peg.1286	3.01	3.01	14.06	11.87	8.125	2
fig|11428.3.peg.3658	3	3	32.84	24.88	11.94	2
fig|11428.3.peg.608	2.98	2.98	15.72	7.547	5.451	3
fig|11428.3.peg.458	2.94	2.94	20.82	6.427	6.427	2
fig|11428.3.peg.5848	2.91	2.91	22.03	8.046	6.13	2
fig|11428.3.peg.406	2.91	2.91	14.4	14.4	14.4	2
fig|11428.3.peg.1077	2.9	2.9	11.76	7.563	7.563	2
fig|11428.3.peg.2113	2.86	2.86	24.76	24.76	24.76	2
fig|1428.368.peg.3868	2.83	2.83	15.15	13.64	10.61	2
fig|11428.3.peg.1706	2.83	2.83	17	10.53	10.53	2
fig|11428.3.peg.4721	2.81	2.81	9.025	9.025	9.025	2
fig|1428.368.peg.3819	2.8	2.8	50.67	50.67	50.67	2
fig|11428.3.peg.3401	2.79	2.79	18.9	8.268	8.268	2
fig|11428.3.peg.4665	2.75	2.75	25.23	14.41	8.408	2
fig|11428.3.peg.3970	2.74	2.74	26.05	12.26	12.26	2
fig|1428.368.peg.2716	2.73	2.73	14.36	6.117	6.117	2
fig|11428.3.peg.1871	2.72	2.72	18.66	5.85	5.85	2
fig|11428.3.peg.4757	2.72	2.72	22.18	9.728	9.728	2
fig|11428.3.peg.3161	2.7	2.7	28.97	14.02	8.411	2
fig|11428.3.peg.1486	2.67	2.67	44.05	19.64	14.88	3
fig|1428.368.peg.2790	2.66	2.67	50.57	26.44	26.44	2
fig|11428.3.peg.4529	2.65	2.65	17.19	12.63	9.474	3
fig|1428.368.peg.5482	2.63	2.63	12.88	10.12	10.12	3
fig|1428.368.peg.5105	2.63	2.63	18.82	12.94	12.94	2
fig|11428.3.peg.4413	2.61	2.61	21.88	5.625	3.75	2
fig|11428.3.peg.5277	2.61	2.61	13.25	3.487	3.487	2
fig|11428.3.peg.5347	2.6	2.6	12.3	7.937	7.937	2
fig|11428.3.peg.1283	2.58	2.58	24.32	9.563	9.563	2
fig|11428.3.peg.1647	2.56	2.56	29.12	13.03	13.03	4
fig|11428.3.peg.1150	2.54	2.54	10.84	8.672	5.962	2
fig|1428.368.peg.5502	2.53	2.53	9.728	3.243	2.51	2
fig|11428.3.peg.93	2.53	2.53	17.11	11.18	8.882	2
fig|11428.3.peg.1355	2.51	2.51	10.17	2.696	2.696	2
fig|11428.3.peg.5210	2.48	2.48	16.76	4.381	4.381	2
fig|11428.3.peg.4392	2.48	2.48	40.26	29.87	29.87	2
fig|11428.3.peg.2929	2.45	2.45	10.26	8.159	8.159	3
fig|11428.3.peg.4658	2.44	2.44	26.45	9.091	9.091	2
fig|11428.3.peg.3170	2.44	2.44	22.76	15.04	15.04	3
fig|1428.368.peg.3396	2.41	2.41	21.03	10.34	6.552	2
fig|1428.368.peg.807	2.4	2.4	15.64	12.35	12.35	2
fig|1428.368.peg.4924	2.4	2.4	12.62	7.443	7.443	2
fig|11428.3.peg.5263	2.35	2.35	10.82	5.647	5.647	2
fig|11428.3.peg.862	2.34	2.34	14.5	6.509	6.509	2
fig|1428.368.peg.6315	2.34	2.34	25	20.14	20.14	2
fig|11428.3.peg.5286	2.33	2.33	20.8	7.6	7.6	2
fig|11428.3.peg.3148	2.27	2.27	14.43	7.56	7.56	2
fig|11428.3.peg.1387	2.26	2.26	15.56	9.63	9.63	2
fig|1428.368.peg.6386	2.25	2.25	11.89	11.89	11.89	2
fig|11428.3.peg.957	2.23	2.23	20.76	11.86	4.661	1
fig|11428.3.peg.1293	2.22	2.22	14.12	8.397	5.344	1
fig|11428.3.peg.5236	2.19	2.19	14.71	5.637	5.637	2
fig|11428.3.peg.3291	2.16	2.16	8.629	4.949	3.173	3
fig|11428.3.peg.5932	2.16	2.16	40.96	12.05	9.639	1
fig|11428.3.peg.6144	2.16	2.16	36.49	14.19	6.757	1
fig|1428.368.peg.4968	2.16	2.16	12.82	12.82	12.82	2
fig|11428.3.peg.472	2.13	2.13	15.98	12.11	3.351	1
fig|1428.368.peg.5739	2.13	2.13	20.47	20.47	10.24	1
fig|1428.368.peg.3934	2.12	2.12	16.48	8.463	3.563	1
fig|11428.3.peg.717	2.11	2.11	33.57	8.127	4.594	1
fig|11428.3.peg.953	2.11	2.11	20.41	5.046	2.523	1
fig|11428.3.peg.2769	2.1	2.1	15.08	12.02	3.435	1
fig|1428.368.peg.6080	2.08	2.08	13.11	5.594	5.594	2
fig|11428.3.peg.1912	2.08	2.08	31.97	25.85	20.41	2
fig|11428.3.peg.509	2.07	2.07	12.09	4.945	1.832	1
fig|11428.3.peg.5075	2.07	2.07	25.81	7.625	3.812	1
fig|1428.368.peg.3136	2.07	2.07	18.89	12.22	6.111	1
fig|11428.3.peg.1393	2.06	2.06	12.33	8.311	4.021	1
fig|11428.3.peg.816	2.05	2.05	14.88	6.336	3.581	1
fig|1428.368.peg.5143	2.05	2.05	15.96	9.772	6.84	1
fig|1428.368.peg.5849	2.04	2.04	16.97	3.303	1.802	1
fig|11428.3.peg.4712	2.04	2.04	13.81	5.594	3.671	1
fig|1428.368.peg.2673	2.04	2.04	25	8.434	4.819	1
fig|1428.368.peg.4397	2.04	2.04	25.26	12.89	6.701	1
fig|11428.3.peg.4357	2.03	2.03	15.41	2.601	1.349	1
fig|1428.368.peg.4515	2.03	2.03	17.82	10.89	7.921	1
fig|1428.368.peg.325	2.03	2.03	11.58	8.757	4.802	1
fig|11428.3.peg.3490	2.03	2.03	20.69	20.69	12.07	1
fig|11428.3.peg.5148	2.02	2.02	14.27	1.679	1.679	1
fig|11428.3.peg.207	2.02	2.02	11.14	5.819	2.959	2
fig|11428.3.peg.2703	2.02	2.02	16.95	5.021	2.929	1
fig|1428.368.peg.4143	2.02	2.02	18.2	6.221	4.147	1
fig|11428.3.peg.3656	2.02	2.02	26.13	14.29	10.8	2
fig|1428.368.peg.6321	2.02	2.02	22.22	10.63	5.314	1
fig|11428.3.peg.1766	2.02	2.02	26.36	13.64	6.818	1
fig|11428.3.peg.1504	2.02	2.02	14.94	7.622	4.878	1
fig|1428.368.peg.5742	2.02	2.02	21.29	16.13	11.61	1
fig|1428.368.peg.1829	2.02	2.02	7.649	7.649	4.533	1
fig|1428.368.peg.5112	2.01	2.01	14.92	2.311	2.311	1
fig|1428.368.peg.1909	2.01	2.01	13.42	2.079	2.079	1
fig|11428.3.peg.3985	2.01	2.01	17.65	2.674	2.674	1
fig|1428.368.peg.522	2.01	2.01	9.32	4.272	2.913	1
fig|1428.368.peg.4056	2.01	2.01	41.9	23.81	12.38	1
fig|11428.3.peg.5139	2.01	2.01	21.99	4.518	4.518	1
fig|11428.3.peg.3046	2.01	2.01	20.56	5.634	5.634	1
fig|11428.3.peg.224	2.01	2.01	9.317	2.64	2.64	1
fig|1428.368.peg.2685	2.01	2.01	11.09	2.715	2.715	1
fig|1428.368.peg.2159	2.01	2.01	17	4.035	4.035	1
fig|11428.3.peg.5977	2.01	2.01	25.75	7.186	7.186	1
fig|11428.3.peg.112	2.01	2.01	25.97	6.494	6.494	1
fig|1428.368.peg.777	2.01	2.01	40	17.89	10.53	1
fig|1428.368.peg.4724	2.01	2.01	31.25	10.23	10.23	1
fig|11428.3.peg.3013	2.01	2.01	18.88	11.24	6.426	1
fig|1428.368.peg.5459	2.01	2.01	11.36	7.571	5.047	1
fig|1428.368.peg.2927	2.01	2.01	21.54	9.231	9.231	1
fig|11428.3.peg.141	2.01	2.01	16.23	6.415	6.415	1
fig|1428.368.peg.3083	2	11.89	20.93	10.98	10.98	6
fig|11428.3.peg.372	2	2.01	17.71	10.29	10.29	1
fig|11428.3.peg.4699	2	2	20.21	7.087	7.087	1
fig|1428.368.peg.5298	2	2	27.78	4.815	4.815	1
fig|1428.368.peg.3990	2	2	22.32	4.911	4.911	1
fig|11428.3.peg.4430	2	2	22.39	5.672	5.672	1
fig|11428.3.peg.1986	2	2	10.62	4.388	4.388	1
fig|11428.3.peg.1409	2	2	9.887	2.119	2.119	1
fig|1428.368.peg.6099	2	2	19.1	6.367	6.367	1
fig|1428.368.peg.5684	2	2	39.38	8.808	8.808	1
fig|1428.368.peg.4423	2	2	19.94	4.361	4.361	1
fig|11428.3.peg.5713	2	2	14.89	4.467	4.467	1
fig|11428.3.peg.3644	2	2	22.45	5.306	5.306	1
fig|11428.3.peg.3503	2	2	23.48	6.073	6.073	1
fig|11428.3.peg.1718	2	2	28.17	6.573	6.573	1
fig|11428.3.peg.1105	2	2	14.57	3.518	3.518	1
fig|1428.368.peg.6268	2	2	6.557	3.577	3.577	1
fig|1428.368.peg.622	2	2	20.14	7.639	7.639	1
fig|1428.368.peg.6054	2	2	8.257	2.982	2.982	1
fig|1428.368.peg.5506	2	2	15.19	6.296	6.296	1
fig|1428.368.peg.5156	2	2	17.54	4.561	4.561	1
fig|1428.368.peg.3362	2	2	10.72	3.497	3.497	1
fig|11428.3.peg.803	2	2	9.938	3.416	3.416	1
fig|11428.3.peg.5206	2	2	10.37	3.457	3.457	1
fig|11428.3.peg.5174	2	2	24.83	6.04	6.04	1
fig|11428.3.peg.4725	2	2	22.01	4.851	4.851	1
fig|11428.3.peg.4267	2	2	11.45	2.61	2.61	1
fig|11428.3.peg.2610	2	2	12.68	5.282	5.282	1
fig|11428.3.peg.235	2	2	6.283	2.618	2.618	2
fig|11428.3.peg.1112	2	2	11.38	4.308	4.308	1
fig|1428.368.peg.6294	2	2	25.83	12.5	12.5	1
fig|1428.368.peg.6118	2	2	12.5	6.579	6.579	1
fig|1428.368.peg.4495	2	2	8.025	3.704	3.704	1
fig|1428.368.peg.3434	2	2	33.33	18.89	18.89	1
fig|1428.368.peg.2545	2	2	13.81	5.405	5.405	1
fig|1428.368.peg.250	2	2	22.64	16.98	9.434	1
fig|1428.368.peg.2219	2	2	10	4.194	4.194	1
fig|11428.3.peg.5744	2	2	29.41	13.73	13.73	1
fig|11428.3.peg.5560	2	2	19.08	9.924	9.924	1
fig|11428.3.peg.4775	2	2	39.19	17.57	17.57	1
fig|11428.3.peg.4507	2	2	11.69	5.645	5.645	1
fig|11428.3.peg.38	2	2	37.7	37.7	37.7	2
fig|11428.3.peg.3525	2	2	8.108	5.135	5.135	1
fig|11428.3.peg.3101	2	2	15.92	7.643	7.643	1
fig|11428.3.peg.2276	2	2	21.76	13.53	13.53	1
fig|11428.3.peg.2013	2	2	15.79	6.579	6.579	1
fig|11428.3.peg.1965	2	2	28.43	14.71	14.71	1
fig|11428.3.peg.1512	2	2	9.236	3.503	3.503	1
fig|1428.368.peg.6101	2	2	16.79	9.16	9.16	1
fig|1428.368.peg.5471	2	2	13.41	7.246	7.246	1
fig|1428.368.peg.4301	2	2	12.32	6.522	6.522	1
fig|1428.368.peg.3880	2	2	7.955	4.261	4.261	1
fig|1428.368.peg.3478	2	2	11.8	7.865	7.865	1
fig|1428.368.peg.2697	2	2	10.51	4.348	4.348	1
fig|1428.368.peg.2418	2	2	4.489	2.993	2.993	1
fig|1428.368.peg.2392	2	2	9.319	5.376	5.376	1
fig|11428.3.peg.700	2	2	8.127	4.24	4.24	1
fig|11428.3.peg.662	2	2	21.74	10.43	10.43	1
fig|11428.3.peg.4916	2	2	25.64	17.95	17.95	1
fig|11428.3.peg.4092	2	2	30.88	17.65	17.65	1
fig|11428.3.peg.3768	2	2	8.904	5.822	5.822	1
fig|11428.3.peg.3594	2	2	10.61	7.071	7.071	1
fig|11428.3.peg.3540	2	2	9.266	5.792	5.792	1
fig|11428.3.peg.3497	2	2	10.76	7.623	7.623	1
fig|1428.368.peg.760	2	2	8.8	8.8	8.8	1
fig|1428.368.peg.6299	2	2	22.22	22.22	22.22	1
fig|1428.368.peg.6251	2	2	15.49	15.49	15.49	1
fig|1428.368.peg.6070	2	2	15.15	15.15	15.15	1
fig|1428.368.peg.5649	2	2	8.661	8.661	8.661	1
fig|1428.368.peg.538	2	2	12.95	12.95	12.95	2
fig|1428.368.peg.4932	2	2	20.9	20.9	20.9	1
fig|1428.368.peg.4713	2	2	17.07	17.07	17.07	1
fig|1428.368.peg.3615	2	2	8.219	8.219	8.219	1
fig|1428.368.peg.3339	2	2	7.113	7.113	7.113	1
fig|1428.368.peg.2661	2	2	4.183	4.183	4.183	1
fig|11428.3.peg.5427	2	2	3.248	3.248	3.248	1
fig|11428.3.peg.5146	2	2	5.948	5.948	5.948	1
fig|11428.3.peg.4543	2	2	13.04	13.04	13.04	1
fig|11428.3.peg.3397	2	2	20.51	20.51	20.51	1
fig|11428.3.peg.5069	1.86	2.01	31.4	7.438	7.438	1
fig|11428.3.peg.3288	1.86	1.86	8.36	4.18	4.18	1
fig|11428.3.peg.2143	1.85	4	21.79	9.829	9.829	2
fig|11428.3.peg.361	1.85	1.85	28.44	9.174	9.174	1
fig|1428.368.peg.3851	1.82	1.85	7.036	2.772	2.772	1
fig|1428.368.peg.3402	1.82	1.85	15.98	7.692	7.692	1
fig|11428.3.peg.5860	1.78	1.78	11.25	6.65	2.558	1
fig|11428.3.peg.3611	1.71	1.71	16.22	2.973	2.973	1
fig|11428.3.peg.1446	1.71	1.71	13.89	13.89	6.944	1
fig|11428.3.peg.4696	1.7	1.7	21.21	3.03	3.03	1
fig|1428.368.peg.4507	1.7	1.7	5.489	2.387	2.387	1
fig|1428.368.peg.869	1.7	1.7	6	6	6	1
fig|1428.368.peg.6018	1.7	1.7	7.453	7.453	7.453	1
fig|1428.368.peg.4670	1.7	1.7	14.94	14.94	14.94	1
fig|11428.3.peg.1373	1.63	1.63	21.98	6.173	3.704	1
fig|11428.3.peg.570	1.61	1.61	13.82	3.925	3.925	2
fig|11428.3.peg.3952	1.6	1.6	28.87	11.97	11.97	2
fig|11428.3.peg.6057	1.6	1.6	13.16	2.632	2.632	1
fig|1428.368.peg.6133	1.59	1.6	6.636	3.204	3.204	1
fig|11428.3.peg.1284	1.53	1.53	12.65	6.481	2.778	1
fig|1428.368.peg.752	1.37	1.37	12.17	1.738	1.738	1
fig|11428.3.peg.3174	1.35	1.35	10.64	6.383	3.647	1
fig|11428.3.peg.2017	1.34	1.35	11.03	3.915	3.915	1
fig|1428.368.peg.4475	1.34	1.35	6.776	2.804	2.804	1
fig|11428.3.peg.2470	1.34	1.35	11.94	3.548	3.548	1
fig|11428.3.peg.1945	1.34	1.34	22.17	11.76	11.76	2
PROTEIN SUMMARY INTERPRETATION
Proteins Detected Table
The Proteins Detected table lists the winner protein for each group, sorted by Unused ProtScore. Table fields and their definitions are listed below.
N
The rank of the specified protein relative to all other proteins in the list of detected proteins.
Unused (ProtScore)
A measure of the protein confidence for a detected protein, calculated from the peptide confidence for peptides from spectra that are not already completely “used” by higher scoring winning proteins.
% Cov (Coverage)
The percentage of matching amino acids from identified peptides having confidence greater than 0 divided by the total number of amino acids in the sequence.
% Cov (50)
The percentage of matching amino acids from identified peptides having confidence greater than or equal to 50% divided by the total number of amino acids in the sequence.
% Cov (95)
The percentage of matching amino acids from identified peptides having confidence greater than or equal to 95% divided by the total number of amino acids in the sequence.
Name
The name of the protein.
Peptides (95%)
The number of distinct peptides having at least 95% confidence. Multiple modified and cleaved states of the same underlying peptide sequence are considered distinct peptides because they have different
molecular formulas. Multiple spectra of the same peptide, due to replicate acquisition or different charge states, only count once

## Sheet: PepsumE24v48
Table S5.2 Peptide summary of the specific search with the supernatant of Bt isoalte E-SE10.2 at 24h and 48 h with Protein Pilot v4.5
Names	Contrib	Conf	Sequence	Modifications	Cleavages	dMass	Prec MW	Prec m/z	Theor MW	Theor m/z	Theor z	Sc	Spectrum
fig|11428.3.peg.2017	1.33724	99	VSLEQVQENFK			-0.00240655	1319.67	660.842	1319.67	660.843	2	14	2.1.1.1831.13
fig|1428.368.peg.4475	1.33724	99	LTERPQVVVANK			-0.00587474	1352.77	677.393	1352.78	677.396	2	8	5.1.1.1578.23
fig|11428.3.peg.2470	1.33724	99	RVDVDTVGIAK		missed R-V@1	-0.0205816	1171.64	391.553	1171.66	391.559	3	10	5.1.1.1636.6
fig|11428.3.peg.1945	0.812479	99	VLGSITVGENSK			-0.0041159	1202.65	602.331	1202.65	602.333	2	12	6.1.1.1500.12
fig|11428.3.peg.1945	0.524329	99	EVPAHSTVVGIPGR			-0.00502715	1417.76	473.595	1417.77	473.597	3	13	6.1.1.1480.4
fig|11428.3.peg.3174	1.34679	99	EATNVTGIVLTK			-0.00255519	1244.7	623.355	1244.7	623.356	2	14	6.1.1.1594.10
fig|11428.3.peg.3174	0.0070049	81.23	EVQAVISEK			-0.0182031	1001.52	501.768	1001.54	501.777	2	8	2.1.1.1519.14
fig|1428.368.peg.752	1.36653	99	VQPVSDAPVNGISTCVK	Deamidated(N)@10; Carbamidomethyl(C)@15		-0.00867792	1770.87	886.444	1770.88	886.448	2	14	2.1.1.1706.26
fig|11428.3.peg.1284	1.45593	99	QENANIVMR	Gln->pyro-Glu@N-term		0.00744415	1056.51	529.262	1056.5	529.258	2	12	2.1.1.1696.9
fig|11428.3.peg.1284	0.0710923	90.3	IFRGDPENTADR		missed R-G@3	0.00456053	1389.67	464.23	1389.66	464.229	3	9	3.1.1.1537.10
fig|1428.368.peg.6133; fig|11428.3.peg.5895	1.58503	99	VDVEVHHEGNVVGK			0.00300633	1516.77	506.596	1516.76	506.595	3	11	6.1.1.1361.13
fig|11428.3.peg.3952	1.45593	99	NQGVTEESSVYESLEK			0.0015774	1797.83	899.922	1797.83	899.921	2	15	5.1.1.1829.20
fig|11428.3.peg.3952	0.145087	98.87	DGNMLIDSGIGNGKLNEK	Deamidated(N)@12	missed K-L@14	0.010667	1874.91	625.979	1874.9	625.975	3	14	5.1.1.1856.13
fig|11428.3.peg.6057	1.60206	99	AIAEGKDEVISGNDAR		missed K-D@6	-0.0014826	1643.81	548.944	1643.81	548.944	3	11	4.1.1.1520.15
fig|11428.3.peg.570	0.970616	99	AYVQENADEER			0.00821867	1322.58	662.298	1322.57	662.294	2	7	4.1.1.1461.20
fig|11428.3.peg.570	0.640165	99	VNETLAYEPDVK			-0.00848672	1376.67	689.344	1376.68	689.348	2	10	5.1.1.1755.19
fig|11428.3.peg.1373	1.60206	99	FVVEDTETKADVAVK		missed K-A@9	0.00756522	1649.86	550.96	1649.85	550.958	3	15	1.1.1.1532.8
fig|11428.3.peg.1373	0.0172766	67.67	DMNVEAQGIK			0.0230618	1103.55	552.783	1103.53	552.771	2	10	3.1.1.1644.15
fig|11428.3.peg.1373	0.0070049	45.88	ISTGAPDIPALK			-0.00117897	1181.66	591.84	1181.67	591.84	2	10	3.1.1.1817.10
fig|11428.3.peg.4696	1.69897	99	LSNEDQMPAGTTLEK			0.00742354	1632.77	817.394	1632.77	817.391	2	15	6.1.1.1500.18
fig|1428.368.peg.4507; fig|11428.3.peg.5264	1.69897	99	FGLIPEFIGR			-0.00356586	1147.64	574.825	1147.64	574.827	2	14	6.1.1.2167.2
fig|1428.368.peg.869; fig|11428.3.peg.225	1.69897	99	SLPLEYQSEQSR			-0.0034346	1435.69	718.853	1435.69	718.854	2	13	4.1.1.1678.21
fig|1428.368.peg.6018; fig|11428.3.peg.3977	1.69897	99	TAIACSSIVVTK	Carbamidomethyl(C)@5		-0.00398035	1248.67	625.343	1248.67	625.345	2	13	5.1.1.1713.12
fig|1428.368.peg.4670; fig|11428.3.peg.889	1.69897	99	VETVDTNIEYYTK			-0.000979957	1573.75	787.882	1573.75	787.883	2	13	4.1.1.1782.25
fig|11428.3.peg.3611	1.69897	99	VVSELDPNSLK			0.004538	1199.64	600.829	1199.64	600.827	2	12	5.1.1.1759.18
fig|11428.3.peg.1446	1.69897	99	TSSGAFLEDNELTSK			0.00509148	1597.75	799.883	1597.75	799.881	2	12	5.1.1.1837.23
fig|11428.3.peg.1446	0.0127808	59.92	SLNELTLHGGAPVTK			0.00144736	1535.83	512.951	1535.83	512.951	3	10	5.1.1.1739.12
fig|11428.3.peg.5860	1.72125	99	GGGVISFSVK			-0.00680675	949.516	475.765	949.523	475.769	2	14	1.1.1.1627.2
fig|11428.3.peg.5860	0.0371573	81.46	EMGIFDNLIR			0.00383981	1206.61	604.313	1206.61	604.311	2	12	6.1.1.2115.2
fig|11428.3.peg.5860	0.015923	64.82	IVSFLR			-0.00268179	733.446	367.73	733.449	367.732	2	7	5.1.1.1821.2
fig|1428.368.peg.3851	1.82391	99	GAHPPGIQNDVPK			-0.0049194	1328.68	443.9	1328.68	443.902	3	11	2.1.1.1535.9
fig|1428.368.peg.3402; fig|11428.3.peg.4488	1.82391	99	HIMVEHMDESSKK		missed K-K@12	0.00191923	1569.73	393.44	1569.73	393.439	4	11	5.1.1.1482.2
fig|11428.3.peg.2143	1.85387	99	EVVAQEEAPAR			0.00194314	1197.6	599.808	1197.6	599.807	2	11	1.1.1.1356.11
fig|11428.3.peg.361	1.85387	99	VYIDTETGEK			0.0012937	1153.55	577.783	1153.55	577.782	2	8	2.1.1.1538.17
fig|11428.3.peg.5069	1.85387	99	YRELGLKDK		missed R-E@2; missed K-D@7	0.000372803	1120.62	374.549	1120.62	374.549	3	9	5.1.1.1518.2
fig|11428.3.peg.3288	1.85387	99	AVLIVSAHSLPEK			0.000690941	1362.79	455.27	1362.79	455.27	3	15	6.1.1.1556.7
fig|1428.368.peg.3083	2	99	SLGYPDAGAHALGVIFTEIAGSLK			0.014269	2386.27	796.43	2386.25	796.425	3	24	1.1.1.3428.2
fig|11428.3.peg.372	2	99	GSFEEISDSLDELIASLK			0.00401288	1951.97	976.991	1951.96	976.989	2	22	6.1.1.3116.2
fig|11428.3.peg.4699	2	99	GGSTTTSTTSGTSSSNSPSLSSGNTVK			-0.00507638	2489.13	830.718	2489.14	830.719	3	16	5.1.1.1574.11
fig|1428.368.peg.5298	2	99	AAAINTNFALGAK			-0.0063221	1260.68	631.346	1260.68	631.349	2	15	3.1.1.1807.12
fig|1428.368.peg.3990	2	99	IAIEEGATYIR		cleaved T-I@N-term	-0.00316615	1234.65	618.334	1234.66	618.335	2	17	1.1.1.1631.7
fig|11428.3.peg.4430	2	99	TVAVIGYGSQGHAQAQNLR			0.00495132	1969.02	657.347	1969.01	657.345	3	16	4.1.1.1644.16
fig|11428.3.peg.1986	2	99	VTGGNGGYAGAQNTHLPLK	Deamidated(N)@5		0.00941008	1854.93	619.318	1854.92	619.315	3	17	6.1.1.1505.18
fig|11428.3.peg.1409	2	99	TGIDLPNESAGQMGK			0.000773801	1516.72	759.367	1516.72	759.367	2	15	1.1.1.1587.16
fig|1428.368.peg.6099; fig|11428.3.peg.5847	2	99	GDGLVVSTPTGSTAYNK			0.00228138	1665.82	833.919	1665.82	833.918	2	17	1.1.1.1556.19
fig|1428.368.peg.5684	2	99	VFSHGFAYAYGENGIEK	Deamidated(N)@13		0.00328969	1888.87	630.63	1888.86	630.628	3	18	3.1.1.1834.9
fig|1428.368.peg.4423	2	99	GIAHVGAICALAEK	Carbamidomethyl(C)@9		0.00780772	1408.76	470.593	1408.75	470.59	3	16	4.1.1.1724.4
fig|11428.3.peg.5713	2	99	GSVCSLGHDDAMGVVMGK	Carbamidomethyl(C)@4		-0.00209581	1818.8	607.275	1818.81	607.276	3	19	5.1.1.1830.4
fig|11428.3.peg.3644	2	99	AVQVENVGVIPAK			-0.00166888	1322.75	662.384	1322.76	662.385	2	15	4.1.1.1712.17
fig|11428.3.peg.3503	2	99	KGELHEHKEETIEVK		missed K-G@1; missed K-E@8	0.00524227	1804.94	452.242	1804.93	452.24	4	15	3.1.1.1450.3
fig|11428.3.peg.1718	2	99	NTVTNETAMANEIR			-0.00233094	1562.73	782.374	1562.74	782.375	2	17	5.1.1.1753.23
fig|11428.3.peg.1105	2	99	TVNEAGGNVPQPIR			0.00064173	1450.75	726.384	1450.75	726.384	2	15	5.1.1.1654.25
fig|1428.368.peg.6268	2	99	ALPVVPGETYDIFLQLSDAINIAR			0.00766221	2614.41	872.477	2614.4	872.474	3	19	2.1.1.4058.2
fig|1428.368.peg.622	2	99	LANMAPNAAER			-0.00379255	1156.56	579.288	1156.57	579.29	2	12	5.1.1.1587.18
fig|1428.368.peg.6054; fig|11428.3.peg.1474	2	99	GIIACGDDEELQK	Carbamidomethyl(C)@5		0.00542735	1446.67	724.343	1446.67	724.34	2	13	5.1.1.1714.14
fig|1428.368.peg.5506	2	99	LADIAAPSILLGQAIGR			-0.00592211	1677.97	839.993	1677.98	839.996	2	21	6.1.1.2185.3
fig|1428.368.peg.5156; fig|11428.3.peg.1783	2	99	TGLYHYAILLPSR			0.00415355	1502.83	501.95	1502.82	501.949	3	15	4.1.1.1909.2
fig|1428.368.peg.3362	2	99	AHGTGVVTDTIYGAR			-0.00929455	1516.75	759.384	1516.76	759.389	2	17	1.1.1.1512.13
fig|11428.3.peg.803	2	99	VLGGLTLLDTK			-0.00213743	1128.67	565.344	1128.68	565.345	2	18	6.1.1.1942.3
fig|11428.3.peg.5206	2	99	GQEVYISAYDTPNK			0.00971297	1583.76	792.885	1583.75	792.881	2	15	2.1.1.1710.21
fig|11428.3.peg.5174	2	99	VGVLVSLGR			0.000208902	898.56	450.287	898.56	450.287	2	13	3.1.1.1827.5
fig|11428.3.peg.4725	2	99	IALGTPESVPAGK			-0.00625858	1238.68	620.348	1238.69	620.351	2	18	3.1.1.1707.5
fig|11428.3.peg.4267	2	99	SGGLADVAGALPK			-0.0027274	1154.63	578.321	1154.63	578.322	2	15	2.1.1.1820.7
fig|11428.3.peg.2610	2	99	INEIDICTESFGNPK	Carbamidomethyl(C)@7		-0.00762587	1735.8	868.908	1735.81	868.912	2	21	2.1.1.1848.15
fig|11428.3.peg.235	2	99	QREIEVENAQQHVSK		missed R-E@2	0.00500149	1793.91	598.976	1793.9	598.975	3	14	6.1.1.1341.22
fig|11428.3.peg.1112	2	99	GIHHVTAITSSAEK			-0.00311756	1449.75	484.259	1449.76	484.26	3	15	2.1.1.1433.7
fig|1428.368.peg.6294; fig|11428.3.peg.1994	2	99	NEVANAETGQDALQK			-0.00594582	1586.75	794.381	1586.75	794.384	2	13	6.1.1.1423.23
fig|1428.368.peg.6118; fig|11428.3.peg.5829	2	99	AYSAVEAYSR			0.0023429	1115.53	558.771	1115.52	558.77	2	13	5.1.1.1654.17
fig|1428.368.peg.4495	2	99	GQLDLTGEYVAR			-0.00214516	1320.67	661.34	1320.67	661.341	2	16	5.1.1.1833.15
fig|1428.368.peg.3434	2	99	TGRNPQTGEEIQIAAGK		missed R-N@3	0.0027364	1768.91	590.644	1768.91	590.643	3	13	2.1.1.1569.18
fig|1428.368.peg.2545	2	99	KVDAVTGAYINHEVPVMR		missed K-V@1	0.000147689	1998.04	667.019	1998.04	667.019	3	21	6.1.1.1594.13
fig|1428.368.peg.250; fig|11428.3.peg.401	2	99	NINIGILALGTMPNR			-0.000571066	1595.88	798.948	1595.88	798.948	2	19	6.1.1.2167.5
fig|1428.368.peg.2219	2	99	GHILLEDVPGTGK			-0.00730197	1334.71	668.363	1334.72	668.367	2	15	6.1.1.1574.19
fig|11428.3.peg.5744	2	99	VNEMLYIDENQGEK			0.00307311	1680.77	841.392	1680.77	841.391	2	15	5.1.1.1827.15
fig|11428.3.peg.5560	2	99	TFTVNFHQEDNAK			0.00157022	1549.72	775.866	1549.72	775.865	2	18	6.1.1.1526.23
fig|11428.3.peg.4775	2	99	TTINEKDIATINK		missed K-D@6	-7.78671e-05	1459.79	730.901	1459.79	730.901	2	21	5.1.1.1673.6
fig|11428.3.peg.4507	2	99	SLVAQCEHTVVVTR	Carbamidomethyl(C)@6		-0.00401067	1597.82	799.918	1597.82	799.92	2	16	1.1.1.1501.25
fig|11428.3.peg.38	2	99	FIGGAIPLIQELLK			0.00293522	1510.92	756.465	1510.91	756.463	2	22	1.1.1.3220.2
fig|11428.3.peg.3525	2	99	AGEEHAEVHALQMAGQNAK			0.0052799	1989.94	664.32	1989.93	664.318	3	14	6.1.1.1461.19
fig|11428.3.peg.3101	2	99	QGFGQMLVNHAK	Gln->pyro-Glu@N-term		-0.00233076	1311.64	656.826	1311.64	656.827	2	16	5.1.1.1921.8
fig|11428.3.peg.2276	2	99	SSESKQEEHDHASHTQQADIQEK		missed K-Q@5	0.0173976	2648.19	663.054	2648.17	663.05	4	22	5.1.1.1364.2
fig|11428.3.peg.2013	2	99	SMTSGYNQAISHPAK			0.00396446	1590.75	531.257	1590.75	531.256	3	12	6.1.1.1412.16
fig|11428.3.peg.1965	2	99	SGATVSGPIPLPTEK			0.00321395	1452.79	727.4	1452.78	727.398	2	14	4.1.1.1782.20
fig|11428.3.peg.1512	2	99	YALASASGLEK			-0.00822141	1108.57	555.291	1108.58	555.295	2	15	1.1.1.1537.3
fig|1428.368.peg.6101; fig|11428.3.peg.5845	2	99	AADGSVILTVSK			-0.00496453	1159.64	580.827	1159.64	580.83	2	12	5.1.1.1755.13
fig|1428.368.peg.5471; fig|11428.3.peg.1336	2	99	IANEGHVIGNHTYSHPNLAK			0.00308002	2171.09	724.704	2171.09	724.703	3	15	6.1.1.1419.26
fig|1428.368.peg.4301; fig|11428.3.peg.4200	2	99	IATIIQGQR			-0.000320311	998.587	500.301	998.587	500.301	2	14	2.1.1.1582.5
fig|1428.368.peg.3880	2	99	SVGFNQHASQYAGMK			-2.63338e-05	1623.75	542.256	1623.75	542.256	3	14	6.1.1.1471.12
fig|1428.368.peg.3478	2	99	NTVNQNVPANTFVK			-0.00259717	1544.79	773.403	1544.79	773.405	2	18	1.1.1.1543.25
fig|1428.368.peg.2697	2	99	TKEEIIYSLNER		missed K-E@2	-0.00176605	1493.77	747.893	1493.77	747.894	2	14	1.1.1.1569.21
fig|1428.368.peg.2418; fig|11428.3.peg.5663	2	99	NAGVSTVYVVNK			-0.00607344	1249.66	625.838	1249.67	625.841	2	12	4.1.1.1624.21
fig|1428.368.peg.2392; fig|11428.3.peg.2624	2	99	DSLGQASGFQSYQYR			0.00611353	1705.78	853.895	1705.77	853.892	2	16	5.1.1.1841.23
fig|11428.3.peg.700	2	99	VAAIANEAAAEK			-0.00203826	1156.61	579.311	1156.61	579.312	2	16	3.1.1.1568.16
fig|11428.3.peg.662	2	99	LGTDTYYVQITK			-0.00164335	1400.72	701.366	1400.72	701.367	2	15	2.1.1.1786.19
fig|11428.3.peg.4916	2	99	TIRDNEEDNERFPK		missed R-D@3; missed R-F@11	0.000847576	1761.83	588.284	1761.83	588.283	3	15	5.1.1.1558.7
fig|11428.3.peg.4092	2	99	AIQGGYDTILAR			-0.00438834	1276.67	639.344	1276.68	639.346	2	14	5.1.1.1839.14
fig|11428.3.peg.3768	2	99	AQAPAAQAKPAAKPAVK			0.00297725	1616.94	539.987	1616.94	539.986	3	11	5.1.1.1426.5
fig|11428.3.peg.3594	2	99	IAHLMEDIGNEPIK			0.00102811	1578.81	527.277	1578.81	527.276	3	16	5.1.1.1833.5
fig|11428.3.peg.3540	2	99	GYGSTQGGFAELASK			-0.004398	1471.69	736.852	1471.69	736.854	2	16	4.1.1.1749.19
fig|11428.3.peg.3497	2	99	AGEVYDIAVSNGANVAK			-0.0023147	1676.83	839.425	1676.84	839.426	2	17	5.1.1.1836.22
fig|1428.368.peg.760; fig|11428.3.peg.5525	2	99	QTIPTDESLSK			0.00107643	1217.62	609.815	1217.61	609.814	2	12	6.1.1.1449.17
fig|1428.368.peg.6299; fig|11428.3.peg.1989	2	99	VELENGHVVLAHVSGK			0.00266832	1686.91	563.31	1686.91	563.309	3	17	5.1.1.1708.9
fig|1428.368.peg.6251; fig|11428.3.peg.6022	2	99	VYASMAGNVWK			-0.00153752	1224.59	613.305	1224.6	613.305	2	16	1.1.1.1637.5
fig|1428.368.peg.6070; fig|11428.3.peg.128	2	99	DIITPLLGMVLGGVDFTDLK			0.00412501	2116.15	706.392	2116.15	706.39	3	27	6.1.1.3568.2
fig|1428.368.peg.5649; fig|11428.3.peg.5070	2	99	VELSDASQVEK			0.0040834	1203.6	602.808	1203.6	602.806	2	13	1.1.1.1452.18
fig|1428.368.peg.538; fig|11428.3.peg.835	2	99	VANELNVSNSHITAVTEK			-0.00396148	1924.98	642.668	1924.99	642.669	3	17	5.1.1.1731.17
fig|1428.368.peg.4932; fig|11428.3.peg.2038	2	99	SLDVQSGWNQVGGK			0.00950372	1473.73	737.873	1473.72	737.868	2	14	4.1.1.1761.24
fig|1428.368.peg.4713; fig|11428.3.peg.931	2	99	VADESFDGDALKFE		missed K-F@12	0.00341704	1541.69	771.853	1541.69	771.852	2	21	4.1.1.1908.10
fig|1428.368.peg.3615; fig|11428.3.peg.2817	2	99	LQTEIDNLSAQR			-0.00268355	1386.71	694.361	1386.71	694.362	2	17	6.1.1.1541.20
fig|1428.368.peg.3339; fig|11428.3.peg.4555	2	99	LFGNIYAGEILLGLLAK			0.000577571	1804.05	903.033	1804.05	903.032	2	25	6.1.1.3011.7
fig|1428.368.peg.2661; fig|11428.3.peg.3336	2	99	IGLALGSGGAK			-0.00331085	942.546	472.281	942.55	472.282	2	13	5.1.1.1719.9
fig|11428.3.peg.5427	2	99	LGIATGNNLPEIAR			-0.00112847	1437.79	719.904	1437.79	719.904	2	18	5.1.1.1918.11
fig|11428.3.peg.5146	2	99	GVDAGTGNGNVVSIAR	Deamidated(N)@8		0.00422539	1486.74	744.378	1486.74	744.376	2	22	5.1.1.1726.15
fig|11428.3.peg.4543	2	99	MPTLEEKKEELQ		missed K-K@7; missed K-E@8	0.0106214	1473.75	737.882	1473.74	737.877	2	17	6.1.1.1470.22
fig|11428.3.peg.3397	2	99	LVSLQEQAESGEVAQR			-0.00209212	1742.88	872.446	1742.88	872.447	2	19	1.1.1.1558.25
fig|1428.368.peg.5112	2	99	GVGDTTDIVQK			0.000970856	1131.58	566.796	1131.58	566.796	2	13	2.1.1.1549.17
fig|1428.368.peg.5112	0.00656377	34.2	AGLSVEKDYLDRK		missed K-D@7; missed R-K@12	-0.00405239	1492.78	374.203	1492.79	374.204	4	8	1.1.1.1509.2
fig|1428.368.peg.1909; fig|11428.3.peg.1926	2	99	HVFEGEADLAK			0.00118664	1214.59	608.304	1214.59	608.304	2	14	3.1.1.1629.19
fig|1428.368.peg.1909; fig|11428.3.peg.1926	0.00656377	33.39	NLQPVGSGPFK			-0.00497671	1142.6	572.309	1142.61	572.311	2	10	5.1.1.1748.9
fig|11428.3.peg.3985	2	99	NPYVITTGPK			-0.004014	1088.58	545.299	1088.59	545.301	2	13	3.1.1.1663.10
fig|1428.368.peg.522	2	99	TFLFCGEVLPNEVAR	Carbamidomethyl(C)@5		0.00107977	1750.87	876.443	1750.87	876.443	2	19	6.1.1.2065.3
fig|1428.368.peg.522	0.0127808	50.73	LLEQIEK			-0.000836023	871.501	436.758	871.501	436.758	2	9	4.1.1.1605.8
fig|1428.368.peg.4056; fig|11428.3.peg.3798	2	99	LQEALEELKEAHR		missed K-E@9	0.000326789	1564.82	392.213	1564.82	392.212	4	12	4.1.1.1658.2
fig|1428.368.peg.4056; fig|11428.3.peg.3798	0.0118872	87.03	LQEALEELK	Deamidated(Q)@2		-0.0109941	1072.55	358.525	1072.57	358.529	3	8	5.1.1.1530.3
fig|11428.3.peg.5139	2	99	AVPDVNKDLVQESQK		missed K-D@7	-0.00898858	1668.86	557.294	1668.87	557.297	3	16	6.1.1.1497.4
fig|11428.3.peg.3046	2	99	EGESGGVAAYSIDSHTGELK			0.00464666	2005.93	669.65	2005.92	669.648	3	17	3.1.1.1745.19
fig|11428.3.peg.224	2	99	TLEWATHSPVQHYNFAK			-0.000908254	2027.98	677.002	2027.99	677.002	3	18	1.1.1.1634.7
fig|11428.3.peg.224	0.0105502	45.92	EADAFWYMK			-0.00333319	1159.5	580.756	1159.5	580.758	2	10	4.1.1.1945.2
fig|1428.368.peg.2685; fig|11428.3.peg.3360	2	99	LLVARPIVPVGK			-0.000528952	1260.83	421.283	1260.83	421.283	3	15	1.1.1.1605.3
fig|1428.368.peg.2685; fig|11428.3.peg.3360	0.00524306	29.75	LIDKFR		missed K-F@4	-0.000976837	790.469	396.242	790.47	396.242	2	6	6.1.1.1419.6
fig|1428.368.peg.2159	2	99	YDGPSEASVSGQVK			0.00393382	1422.67	712.341	1422.66	712.339	2	16	3.1.1.1636.18
fig|1428.368.peg.2159	0.00612309	33.17	SLSVGENILK			-0.0114051	1058.59	530.3	1058.6	530.306	2	8	4.1.1.1777.9
fig|11428.3.peg.5977	2	99	VNAAFVETLQNK			-7.11174e-05	1332.7	667.359	1332.7	667.359	2	16	6.1.1.1630.5
fig|11428.3.peg.5977	0.00568285	32.42	GQMTVLMR			0.00295836	934.476	468.245	934.473	468.244	2	8	2.1.1.1675.7
fig|11428.3.peg.112	2	99	AGDPWDIFIR			-0.003556	1188.59	595.302	1188.59	595.304	2	17	6.1.1.2193.2
fig|11428.3.peg.112	0.0105502	47.09	TNTFENYENEK			0.00188017	1387.59	694.803	1387.59	694.802	2	9	2.1.1.1600.22
fig|1428.368.peg.777; fig|11428.3.peg.5508	2	99	ISEEDVQMLR			-0.00173562	1218.59	610.302	1218.59	610.303	2	16	1.1.1.1613.17
fig|1428.368.peg.777; fig|11428.3.peg.5508	0.0127808	52.02	ALAHPLR			-0.00113881	776.465	389.24	776.466	389.24	2	6	6.1.1.1295.5
fig|1428.368.peg.4724; fig|11428.3.peg.942	2	99	FIVSHDTGNPGSNAIGNR			0.0111918	1854.91	619.31	1854.9	619.306	3	16	5.1.1.1666.17
fig|1428.368.peg.4724; fig|11428.3.peg.942	0.00612309	34.25	AMFPIER		cleaved M-A@N-term	0.0113724	862.448	432.231	862.437	432.226	2	6	5.1.1.1806.4
fig|11428.3.peg.3013	2	99	IAILTGAGNNTNLIER			-0.00251472	1668.91	557.312	1668.92	557.313	3	22	4.1.1.1873.7
fig|11428.3.peg.3013	0.0123337	50.99	LQDRDPAIEIIR		missed R-D@4	-0.00551816	1437.79	480.27	1437.79	480.272	3	15	1.1.1.1595.4
fig|1428.368.peg.5459	2	99	FANASGLQEPDGSETK			0.013495	1649.77	825.891	1649.75	825.884	2	15	5.1.1.1660.26
fig|1428.368.peg.5459	0.00568285	80.92	TGVTEKVV		cleaved V-P@C-term; missed K-V@6	0.0112416	831.481	416.748	831.47	416.742	2	8	3.1.1.1607.4
fig|1428.368.peg.2927; fig|11428.3.peg.4644	2	99	QALFTMTGLEPK			-0.00166631	1334.69	668.352	1334.69	668.352	2	18	5.1.1.2087.3
fig|1428.368.peg.2927; fig|11428.3.peg.4644	0.00788851	40.09	GNFATDVVEK			-0.00248135	1078.53	540.271	1078.53	540.272	2	11	6.1.1.1504.13
fig|11428.3.peg.141	2	99	FDHLVHAVHGTPEEAAK			0.00596967	1856.92	619.982	1856.92	619.98	3	21	1.1.1.1416.19
fig|11428.3.peg.141	0.00921731	43.29	EAENPLVQETVVK			-0.0104709	1454.75	728.383	1454.76	728.388	2	11	3.1.1.1786.20
fig|11428.3.peg.5148	2	99	EVPIAVSNQDAGSNLR			0.00136643	1668.84	835.429	1668.84	835.429	2	14	4.1.1.1688.25
fig|11428.3.peg.5148	0.0101054	43.14	ADANQIYDNAK			0.00583841	1221.57	611.792	1221.56	611.789	2	8	5.1.1.1590.11
fig|11428.3.peg.207	2	99	AITDLDLPSGAK			-0.00620416	1199.63	600.824	1199.64	600.827	2	15	5.1.1.1833.9
fig|11428.3.peg.207	0.0177288	57.29	TFEPAELDYIK			0.00189249	1324.66	663.336	1324.66	663.335	2	10	4.1.1.1922.7
fig|11428.3.peg.2703	2	99	ALGAIPTSTLGYEK			-0.00683313	1419.75	710.884	1419.76	710.888	2	16	2.1.1.1808.6
fig|11428.3.peg.2703	0.0190881	59.24	SAIAASILQR			-0.0080815	1028.59	515.302	1028.6	515.306	2	11	3.1.1.1787.8
fig|1428.368.peg.4143	2	99	VNEKVEEVKEQEVSDLHA		missed K-V@4; missed K-E@9	0.00329364	2081.03	694.684	2081.03	694.683	3	20	5.1.1.1706.23
fig|1428.368.peg.4143	0.0204516	74.02	IIEENEGVR			0.0309845	1057.57	529.793	1057.54	529.777	2	8	2.1.1.1480.12
fig|11428.3.peg.3656	2	99	DIEFTQAGLAK			-0.00130487	1191.61	596.813	1191.61	596.814	2	16	3.1.1.1826.7
fig|11428.3.peg.3656	0.0209071	99	DVAEGGEVDRETISAVSTPR		missed R-E@10	1.0028	2088.02	697.013	2087.01	696.678	3	16	2.1.1.1715.21
fig|1428.368.peg.6321; fig|11428.3.peg.1967	2	99	GGGTVFGPTPR			0.000889428	1044.54	523.275	1044.54	523.275	2	13	4.1.1.1604.17
fig|1428.368.peg.6321; fig|11428.3.peg.1967	0.015923	55.25	AAVEKVEEVLA		missed K-V@5	-0.000853012	1156.63	579.324	1156.63	579.324	2	10	4.1.1.1769.11
fig|11428.3.peg.1766	2	99	AVGTEQGSSPAMTFK			-0.00164667	1509.71	755.863	1509.71	755.864	2	16	2.1.1.1656.26
fig|11428.3.peg.1766	0.0154727	54.67	LKAEEEQKKAEEEAK		missed K-A@2; missed K-K@8; missed K-A@9	0.00525274	1758.91	587.309	1758.9	587.307	3	7	5.1.1.1475.9
fig|11428.3.peg.1504	2	99	QIPIAGISASDEPSQK			-0.00817839	1639.83	820.924	1639.84	820.928	2	17	5.1.1.1804.26
fig|11428.3.peg.1504	0.015923	55.36	FTDLDDGFK			0.00255506	1056.48	529.247	1056.48	529.245	2	8	4.1.1.1749.6
fig|1428.368.peg.5742; fig|11428.3.peg.5700	2	99	NDGATDGVLAFIPFLNSK			-0.00649502	1877.95	939.98	1877.95	939.983	2	24	4.1.1.3030.3
fig|1428.368.peg.5742; fig|11428.3.peg.5700	0.015923	55.73	TWGDLAK			-0.00189898	789.4	395.707	789.402	395.708	2	7	4.1.1.1645.4
fig|1428.368.peg.1829; fig|11428.3.peg.3019	2	99	SVIVEKPFCDTVEHAK	Carbamidomethyl(C)@9		0.0217581	1857.95	465.495	1857.93	465.49	4	16	1.1.1.1532.4
fig|1428.368.peg.1829; fig|11428.3.peg.3019	0.0154727	55.08	YGEDQQENDLK			0.000426286	1337.57	669.794	1337.57	669.794	2	6	4.1.1.1480.15
fig|11428.3.peg.4357	2	99	NQDFGASGGSNEIK			-0.00492212	1422.63	712.324	1422.64	712.326	2	12	4.1.1.1540.25
fig|11428.3.peg.4357	0.0172766	56.58	AETEIKEALTNVK		missed K-E@6	-0.01489	1444.76	723.389	1444.78	723.396	2	10	5.1.1.1736.24
fig|11428.3.peg.4357	0.0109954	45.35	SVVVDGNITTIK			-0.00293981	1244.69	623.355	1244.7	623.356	2	9	4.1.1.1717.18
fig|1428.368.peg.4515	2	99	AMAELSSDEKNAISHR		missed K-N@10	0.0100848	1757.85	879.931	1757.84	879.926	2	14	6.1.1.1456.26
fig|1428.368.peg.4515	0.0329203	71.46	FDLEVK			-0.00320852	749.393	375.704	749.396	375.705	2	7	4.1.1.1715.2
fig|1428.368.peg.325; fig|11428.3.peg.339	2	99	LGTANNEMVADESIKEK		missed K-E@15	0.00731842	1847.9	616.974	1847.89	616.972	3	18	6.1.1.1470.16
fig|1428.368.peg.325; fig|11428.3.peg.339	0.0315171	70.76	DYSAIALNTDKEIK		missed K-E@11	0.00102168	1579.81	527.611	1579.81	527.61	3	11	5.1.1.1807.10
fig|11428.3.peg.3490	2	99	LEGELDHHTAEELR			-0.0024292	1647.78	824.899	1647.79	824.9	2	20	1.1.1.1447.15
fig|11428.3.peg.3490	0.0282604	88.22	SLSMQLEVKR		cleaved M-S@N-term; missed K-R@9	0.0478041	1189.7	397.573	1189.65	397.557	3	8	2.1.1.1657.4
fig|1428.368.peg.5849	2	99	FANNINEEITEK			-0.00564037	1420.68	711.346	1420.68	711.349	2	15	5.1.1.1749.13
fig|1428.368.peg.5849	0.0423927	76.09	SADQIIVLDR			-0.0101778	1128.6	565.309	1128.61	565.314	2	11	5.1.1.1839.7
fig|11428.3.peg.4712	2	99	KAETIPGYVTMSGTNPDAEAK		missed K-A@1	0.00722344	2179.05	727.359	2179.05	727.356	3	15	4.1.1.1720.18
fig|11428.3.peg.4712	0.0423927	76.26	AHTVVYAANAK			-0.00400432	1143.6	382.207	1143.6	382.208	3	8	4.1.1.1403.3
fig|1428.368.peg.2673; fig|11428.3.peg.3348	2	99	AGDLGLPVCDGPGGSK	Carbamidomethyl(C)@9		-0.00301047	1498.71	750.36	1498.71	750.362	2	17	6.1.1.1592.19
fig|1428.368.peg.2673; fig|11428.3.peg.3348	0.034328	72.01	YKVPWEDEIKVK		missed K-V@2; missed K-V@10	0.00327567	1532.83	384.214	1532.82	384.213	4	7	4.1.1.1787.2
fig|1428.368.peg.4397; fig|11428.3.peg.1508	2	99	ETGEFIASAGLHR			-0.00480084	1386.68	694.35	1386.69	694.352	2	13	1.1.1.1547.21
fig|1428.368.peg.4397; fig|11428.3.peg.1508	0.0376307	74.03	EQTEQEVEESIR			0.00110113	1475.68	738.845	1475.67	738.844	2	11	1.1.1.1528.21
fig|1428.368.peg.4397; fig|11428.3.peg.1508	0.00656377	32.18	EQTEQEVEESIRK		missed R-K@12	0.00287446	1603.77	535.598	1603.77	535.597	3	10	1.1.1.1485.16
fig|11428.3.peg.816	2	99	EIQIEEEKVNEAK		missed K-V@8	-0.002094	1557.79	779.9	1557.79	779.902	2	15	3.1.1.1628.17
fig|11428.3.peg.816	0.0501223	79.07	IESAQHVVER			-0.00223188	1166.6	389.875	1166.6	389.875	3	7	4.1.1.1423.8
fig|1428.368.peg.5143; fig|11428.3.peg.1770	2	99	ALGATVVHTPTEQGMTGAIAK			-0.00306139	2052.06	685.029	2052.07	685.03	3	20	1.1.1.1602.10
fig|1428.368.peg.5143; fig|11428.3.peg.1770	0.0491485	78.86	ELIEDALEK			0.00555753	1058.56	530.285	1058.55	530.282	2	11	3.1.1.1811.5
fig|11428.3.peg.1393	2	99	VVVFVPVTHAEEVRK		missed R-K@14	0.00107888	1707.97	570.33	1707.97	570.33	3	15	2.1.1.1698.15
fig|11428.3.peg.1393	0.0594835	81.84	VAVLGGDGNKYINQAK		missed K-Y@10	-0.00333456	1645.88	549.632	1645.88	549.634	3	12	3.1.1.1699.10
fig|11428.3.peg.509	2	99	INHIQSNIIK			-0.00123545	1178.68	393.899	1178.68	393.9	3	13	2.1.1.1548.8
fig|11428.3.peg.509	0.0390538	74.06	VAEKIEESYEK		missed K-I@4	0.0029842	1323.66	442.227	1323.66	442.226	3	8	1.1.1.1390.8
fig|11428.3.peg.509	0.0177288	55.99	LLDLAR			0.0259339	699.454	350.734	699.428	350.721	2	6	2.1.1.1689.2
fig|11428.3.peg.509	0.0109954	43.4	YFVTALVK			-0.00161974	939.542	470.778	939.543	470.779	2	10	2.1.1.1842.2
fig|11428.3.peg.5075	2	99	SGDVTAVDNANLK			0.000644944	1302.64	652.328	1302.64	652.328	2	18	4.1.1.1559.7
fig|11428.3.peg.5075	0.0670192	83.53	GDAYPSQLSGGQK			-0.00338659	1306.61	654.313	1306.62	654.315	2	8	5.1.1.1608.19
fig|1428.368.peg.3136; fig|11428.3.peg.5738	2	99	VLISEEQIQEK			0.00107906	1314.7	658.359	1314.7	658.359	2	15	3.1.1.1723.18
fig|1428.368.peg.3136; fig|11428.3.peg.5738	0.0680339	83.86	IVTLLDKPTGR			-0.00492029	1211.72	606.867	1211.72	606.869	2	10	2.1.1.1654.11
fig|1428.368.peg.6080; fig|11428.3.peg.118	1.26761	99	HVLSVGEPLNPEVIR			0.00614424	1657.92	553.648	1657.92	553.646	3	12	4.1.1.1819.8
fig|1428.368.peg.6080; fig|11428.3.peg.118	0.801343	99	GVLHAQNAMVQHYQTAK			-0.00301387	1894.94	948.479	1894.95	948.481	2	11	6.1.1.1443.23
fig|1428.368.peg.6080; fig|11428.3.peg.118	0.0070049	32.73	VALYYQDGSR			-0.000616875	1170.57	586.29	1170.57	586.291	2	7	4.1.1.1633.14
fig|11428.3.peg.1912	2	99	IGNLITGDTFYLTQHFGR			0.00807209	2052.05	685.024	2052.04	685.022	3	24	1.1.1.2216.3
fig|11428.3.peg.1912	0.076756	85.38	EHFGAQMK			0.000572591	946.434	474.224	946.433	474.224	2	8	3.1.1.1490.4
fig|11428.3.peg.2769	2	99	SKQEQEESSTAQEGADTK		missed K-Q@2	-0.00455171	1951.86	651.626	1951.86	651.628	3	18	4.1.1.1335.2
fig|11428.3.peg.2769	0.0624821	82.19	GTAAITVGVKR		missed K-R@10	-0.00142276	1071.64	358.22	1071.64	358.221	3	7	6.1.1.1386.2
fig|11428.3.peg.2769	0.0204516	59.09	GTDEAHSSSSSSYEKEVEMQHQLEGK		missed K-E@15	0.0382463	2879.29	720.83	2879.25	720.82	4	12	6.1.1.1489.21
fig|11428.3.peg.2769	0.0186345	56.96	QLEQDIVR			-0.00172192	999.533	500.774	999.535	500.775	2	7	4.1.1.1604.15
fig|11428.3.peg.717	2	99	DMAVVTSQGLVGR			-0.000904998	1331.69	666.85	1331.69	666.851	2	13	4.1.1.1775.20
fig|11428.3.peg.717	0.106238	89.15	VSAIVQGQEK			0.00131275	1057.58	529.796	1057.58	529.796	2	7	2.1.1.1451.14
fig|11428.3.peg.717	0.00524306	26.03	IVEVQPDAYGLTK			0.0029313	1431.76	716.889	1431.76	716.888	2	8	4.1.1.1772.23
fig|11428.3.peg.953	2	99	VIVSNVAGTTR			-0.00218932	1115.63	558.821	1115.63	558.822	2	13	2.1.1.1547.14
fig|11428.3.peg.953	0.106238	89.16	SNKPVVLAVNK			-0.00220712	1167.7	390.239	1167.7	390.24	3	8	5.1.1.1573.7
fig|1428.368.peg.3934; fig|11428.3.peg.3176	2	99	AKEDHHDYVLIDTAGR		missed K-E@2	0.00924822	1838.9	613.974	1838.89	613.971	3	16	1.1.1.1478.13
fig|1428.368.peg.3934; fig|11428.3.peg.3176	0.0619809	81.9	GSGTTVQEINR			-0.00206365	1160.58	581.295	1160.58	581.297	2	8	2.1.1.1461.12
fig|1428.368.peg.3934; fig|11428.3.peg.3176	0.0565055	80.35	LDAIEAFHPER			0.00513999	1296.65	433.224	1296.65	433.223	3	8	4.1.1.1747.6
fig|11428.3.peg.472	2	99	ITGNSYAEEIEKR		missed K-R@12	-0.00230003	1508.74	503.922	1508.75	503.923	3	14	6.1.1.1491.13
fig|11428.3.peg.472	0.0942041	87.64	EMLTTVPIEGK			-0.0136253	1216.62	609.319	1216.64	609.326	2	13	6.1.1.1607.3
fig|11428.3.peg.472	0.02365	61.99	LQLDDPIEK			-0.00298167	1069.56	535.789	1069.57	535.79	2	10	2.1.1.1740.10
fig|11428.3.peg.472	0.015923	52.15	GVGDAYGLGIYETK			-0.000631099	1441.71	721.861	1441.71	721.862	2	11	4.1.1.1863.8
fig|1428.368.peg.5739	2	99	IIDENDDLICISR	Carbamidomethyl(C)@10		0.00284569	1574.76	788.389	1574.76	788.388	2	16	4.1.1.1902.8
fig|1428.368.peg.5739	0.131356	91.22	DGIVTAIGTPIHR			-0.00515821	1348.74	675.378	1348.75	675.38	2	12	6.1.1.1611.15
fig|11428.3.peg.3291	2	99	VSDVVASPNGGEVAK	Deamidated(N)@9		0.00445718	1428.71	715.364	1428.71	715.362	2	19	2.1.1.1560.11
fig|11428.3.peg.3291	0.116907	99	EETASMSVEK		cleaved A-E@N-term	0.000137832	1109.49	555.753	1109.49	555.753	2	10	1.1.1.1343.9
fig|11428.3.peg.3291	0.0404816	73.62	TAVNVKDHPENIGK		missed K-D@6	0.00921795	1520.8	381.208	1520.79	381.206	4	7	3.1.1.1513.5
fig|11428.3.peg.5932	2	99	FSEACAEVSTVESKPK	Carbamidomethyl(C)@5		0.00303015	1767.84	884.926	1767.83	884.925	2	20	6.1.1.1469.26
fig|11428.3.peg.5932	0.157391	92.65	VLDRFSEACAEVSTVESKPK	Carbamidomethyl(C)@9	missed R-F@4	0.00585298	2251.12	563.788	2251.12	563.786	4	11	2.1.1.1744.14
fig|11428.3.peg.6144	2	99	DIVNILTGEK			0.00104245	1100.61	551.312	1100.61	551.311	2	16	5.1.1.2153.2
fig|11428.3.peg.6144	0.140261	91.69	HKEESEVLWGK		missed K-E@2	-0.00144271	1340.67	671.343	1340.67	671.344	2	9	5.1.1.1614.24
fig|11428.3.peg.6144	0.00921731	38.42	EIIQLLK			0.000219088	855.543	428.779	855.543	428.779	2	9	2.1.1.1840.2
fig|11428.3.peg.6144	0.00568285	27.95	IFIDKHKEESEVLWGK		missed K-H@5; missed K-E@7	-0.00773161	1957.02	653.348	1957.03	653.351	3	11	3.1.1.1756.19
fig|1428.368.peg.4968	2	99	VESIDDDDCAVLR	Carbamidomethyl(C)@9		-0.00141389	1505.67	753.84	1505.67	753.841	2	18	4.1.1.1702.22
fig|1428.368.peg.4968	0.156145	96.1	PFILYTK		cleaved R-P@N-term	3.83344e-05	880.506	441.26	880.506	441.26	2	10	5.1.1.1850.3
fig|11428.3.peg.5236	2	99	IAVVVESSTYK			-0.00282158	1194.65	598.331	1194.65	598.332	2	13	3.1.1.1702.17
fig|11428.3.peg.5236	0.193142	98.54	IYVNGVMNYSDK	Deamidated(N)@4		0.000432732	1402.64	702.329	1402.64	702.329	2	11	4.1.1.1757.13
fig|11428.3.peg.1293	2	99	IIINSSLTAKEPSK		missed K-E@10	-0.00638844	1499.85	750.932	1499.86	750.935	2	17	3.1.1.1683.16
fig|11428.3.peg.1293	0.211125	94.67	AGLASLSK			0.00102305	745.434	373.724	745.433	373.724	2	7	1.1.1.1432.2
fig|11428.3.peg.957	2	99	IAEQIQELSLK			-0.00349636	1270.71	636.362	1270.71	636.364	2	17	2.1.1.1809.9
fig|11428.3.peg.957	0.138466	91.36	DMSTPIYQK			-0.000173843	1081.51	541.763	1081.51	541.763	2	9	2.1.1.1605.18
fig|11428.3.peg.957	0.090444	86.72	DGEPIFLK			0.00201183	917.488	459.751	917.486	459.75	2	8	2.1.1.1794.5
fig|1428.368.peg.6386; fig|11428.3.peg.3265	2	99	NIYGQDFIDIFEK			0.00386605	1600.78	801.398	1600.78	801.396	2	18	6.1.1.2235.4
fig|1428.368.peg.6386; fig|11428.3.peg.3265	0.250264	95.63	GASISEIAK			0.000615326	874.477	438.246	874.476	438.245	2	8	2.1.1.1553.12
fig|11428.3.peg.1387	2	99	SLGLSDGATYANINR			0.0037509	1550.77	776.394	1550.77	776.392	2	14	5.1.1.1838.25
fig|11428.3.peg.1387	0.25649	95.75	INCQVIDVSNK	Carbamidomethyl(C)@3		6.14436e-05	1288.64	645.33	1288.64	645.33	2	10	4.1.1.1628.22
fig|11428.3.peg.3148	2	99	LKELHNQGLDEQR		missed K-E@2	0.0054185	1578.82	527.279	1578.81	527.278	3	12	6.1.1.1340.13
fig|11428.3.peg.3148	0.271646	96.03	IREQVQNIE		missed R-E@2	-0.000450263	1127.59	564.804	1127.59	564.804	2	10	4.1.1.1538.18
fig|11428.3.peg.5286	2	99	RAPLYAGACPR	Carbamidomethyl(C)@9	missed R-A@1	0.00255358	1230.63	411.218	1230.63	411.217	3	12	5.1.1.1576.4
fig|11428.3.peg.5286	0.329754	96.92	YIEEVDLK			0.00289061	1007.52	504.767	1007.52	504.766	2	9	2.1.1.1686.10
fig|11428.3.peg.862	2	99	AHGVTQVATFTK			-0.00178255	1258.67	630.34	1258.67	630.341	2	16	6.1.1.1430.22
fig|11428.3.peg.862	0.335358	96.98	SLEEEVTNSK			0.00798816	1134.55	568.282	1134.54	568.278	2	10	5.1.1.1642.19
fig|11428.3.peg.862	0.00524306	25.43	IQKEWLDQVR		missed K-E@3	-0.00765379	1313.7	657.858	1313.71	657.862	2	8	6.1.1.1548.16
fig|1428.368.peg.6315; fig|11428.3.peg.1973	2	99	GAPEGWVAVVKPGK			0.00127839	1393.77	465.598	1393.77	465.598	3	15	1.1.1.1611.5
fig|1428.368.peg.6315; fig|11428.3.peg.1973	0.342944	97.08	IFPSKPYTAKPLEVR			-0.00298105	1744.98	582.669	1744.99	582.67	3	12	2.1.1.1674.18
fig|11428.3.peg.5263	2	99	VETTVTDEDVENELK			0.00133035	1719.81	860.91	1719.81	860.91	2	15	2.1.1.1764.23
fig|11428.3.peg.5263	0.346788	97.1	NANLIFTAK			-0.00413854	990.546	496.28	990.55	496.282	2	11	1.1.1.1592.6
fig|1428.368.peg.807	2	99	KGEVVVVVGPSGSGK		cleaved Q-K@N-term; missed K-G@1	0.00410468	1397.79	699.903	1397.79	699.901	2	19	1.1.1.1444.11
fig|1428.368.peg.807	0.400117	97.62	ANVYPHQLSGGQQQR			-0.000343178	1681.83	561.617	1681.83	561.617	3	11	4.1.1.1510.16
fig|1428.368.peg.4924; fig|11428.3.peg.2044	2	99	YGLNDPVPVQYAR			0.000369453	1490.75	746.383	1490.75	746.383	2	19	3.1.1.1851.6
fig|1428.368.peg.4924; fig|11428.3.peg.2044	0.395774	97.6	GISQGVIIVK			0.00114355	1012.63	507.322	1012.63	507.321	2	12	6.1.1.1565.8
fig|1428.368.peg.3396; fig|11428.3.peg.4495	2	99	SLDMIEEYVSK			-0.00142489	1312.62	657.318	1312.62	657.318	2	18	4.1.1.1966.3
fig|1428.368.peg.3396; fig|11428.3.peg.4495	0.233587	95.06	EMLLGWVK			0.00240706	974.529	488.272	974.526	488.27	2	12	6.1.1.1997.2
fig|1428.368.peg.3396; fig|11428.3.peg.4495	0.179142	93.25	SGMKEEFEWAK		missed K-E@4	-0.00277312	1340.6	671.309	1340.61	671.311	2	12	6.1.1.1569.16
fig|11428.3.peg.4658	2	99	GLEEEVITLVR			-0.000379023	1256.7	629.356	1256.7	629.356	2	17	6.1.1.2117.3
fig|11428.3.peg.4658	0.430626	97.84	VVVIHDETVDR			0.00251219	1280.68	641.345	1280.67	641.344	2	10	1.1.1.1432.24
fig|11428.3.peg.4658	0.00612309	27.7	KMGATAVHPNYR		missed K-M@1	-0.00325901	1343.67	448.899	1343.68	448.9	3	6	3.1.1.1487.7
fig|11428.3.peg.3170	1.29243	99	ADVANADDVTNMVK			0.00411049	1461.68	731.848	1461.68	731.846	2	12	4.1.1.1729.14
fig|11428.3.peg.3170	0.782516	99	QGANVVVNYAGNEQK			-0.00202538	1589.78	795.896	1589.78	795.897	2	11	1.1.1.1495.19
fig|11428.3.peg.3170	0.352617	97.12	AIAIDLAK			-0.000612237	813.495	407.755	813.496	407.755	2	9	5.1.1.1766.3
fig|11428.3.peg.3170	0.00788851	33.11	VALVTGASR			-0.00882878	872.499	437.257	872.508	437.261	2	7	5.1.1.1584.7
fig|11428.3.peg.2929	1.20066	99	IAMRPGSVTTVAEVEGK			-0.0386719	1743.88	582.301	1743.92	582.314	3	16	1.1.1.1570.12
fig|11428.3.peg.2929	0.761954	99	LQANVLFNK			-0.0068424	1045.59	523.8	1045.59	523.803	2	13	3.1.1.1793.5
fig|11428.3.peg.2929	0.489455	98.23	SPYDGFAIR			-0.00237959	1024.5	513.255	1024.5	513.256	2	11	3.1.1.1817.5
fig|11428.3.peg.5210	2	99	GVMIEHSALINR			0.00419318	1338.71	447.245	1338.71	447.243	3	14	5.1.1.1720.9
fig|11428.3.peg.5210	0.474955	98.13	VNEMPLTDSGK			0.00378845	1189.57	595.792	1189.56	595.79	2	10	5.1.1.1649.18
fig|11428.3.peg.5210	0.00568285	25.87	TPDEVAVIFKK		missed K-K@10	0.000479227	1245.7	416.24	1245.7	416.24	3	8	4.1.1.1762.3
fig|11428.3.peg.4392	2	99	IDYKDVDLLKR		missed K-D@4; missed K-R@10	-0.00118954	1376.77	689.39	1376.77	689.39	2	18	1.1.1.1605.23
fig|11428.3.peg.4392	0.481486	98.18	KVCFFTANGITR	Carbamidomethyl(C)@3	missed K-V@1	0.00157313	1412.72	471.916	1412.72	471.915	3	11	4.1.1.1761.6
fig|11428.3.peg.1355	2	99	LHPDQQLNESNK			0.000424558	1421.69	474.904	1421.69	474.904	3	10	5.1.1.1490.7
fig|11428.3.peg.1355	0.510041	98.33	IYNQSGFIQR			0.00127974	1224.63	613.321	1224.63	613.32	2	10	5.1.1.1704.17
fig|1428.368.peg.5502	2	99	LGQPATTLSGGEAQR			-0.00204946	1484.76	743.385	1484.76	743.386	2	10	5.1.1.1629.26
fig|1428.368.peg.5502	0.471083	98.08	HSIEVVIDR			0.00572053	1066.58	356.535	1066.58	356.533	3	8	4.1.1.1602.4
fig|1428.368.peg.5502	0.0584886	78.98	VLEYPER			-0.00379848	904.462	453.238	904.465	453.24	2	7	2.1.1.1564.14
fig|11428.3.peg.93	2	99	FLHEELAMSK			0.00270827	1203.6	402.207	1203.6	402.206	3	13	2.1.1.1653.2
fig|11428.3.peg.93	0.490797	98.21	SISCGTPHDHGGNMDCK	Carbamidomethyl(C)@4; Carbamidomethyl(C)@16		0.00186712	1871.74	468.942	1871.73	468.941	4	11	2.1.1.1387.4
fig|11428.3.peg.93	0.034328	68.43	LGFTFSK			-0.00131241	798.426	400.22	798.428	400.221	2	7	3.1.1.1823.2
fig|11428.3.peg.1150	2	99	LEAADKVNIK		missed K-V@6	0.0004319	1099.62	550.819	1099.62	550.819	2	15	6.1.1.1392.9
fig|11428.3.peg.1150	0.331614	96.74	IITSVELTGPLK			0.000855706	1269.76	635.885	1269.75	635.884	2	12	4.1.1.1872.11
fig|11428.3.peg.1150	0.202732	93.91	NSANTLTALR			-0.000809677	1059.57	530.79	1059.57	530.791	2	9	2.1.1.1614.16
fig|11428.3.peg.1647	2	99	EARPNETVEQAKR		missed K-R@12	-0.00403266	1526.78	509.933	1526.78	509.934	3	15	5.1.1.1425.3
fig|11428.3.peg.1647	0.447332	97.89	MMSAASAVTR			0.00281661	1023.49	512.751	1023.48	512.749	2	9	5.1.1.1613.14
fig|11428.3.peg.1647	0.0963675	96.77	HALQAPTAIMK	Oxidation(M)@10		0.00106194	1195.64	399.554	1195.64	399.553	3	7	6.1.1.1398.6
fig|11428.3.peg.1647	0.0154727	48.61	EARPNETVEQAK			-0.00131133	1370.68	457.9	1370.68	457.9	3	7	4.1.1.1366.10
fig|11428.3.peg.1283	2	99	VDVVVGSQNPHKEEIESYCR	Carbamidomethyl(C)@19	missed K-E@12	0.00740514	2344.12	782.38	2344.11	782.378	3	17	1.1.1.1506.25
fig|11428.3.peg.1283	0.563837	98.56	ALSIQCASNSDEIAK	Carbamidomethyl(C)@6		-0.00528927	1605.76	803.888	1605.77	803.891	2	13	2.1.1.1681.22
fig|11428.3.peg.1283	0.0150229	47.62	ADASIEIGTGHIMR			0.0100349	1469.74	490.921	1469.73	490.917	3	11	2.1.1.1711.6
fig|11428.3.peg.5347	1.52288	99	GQLIQTELQR			-0.00404044	1184.65	593.331	1184.65	593.333	2	13	2.1.1.1686.18
fig|11428.3.peg.5347	1.06048	99	ILEAAVGSGR			-0.00100777	971.539	486.777	971.54	486.777	2	11	3.1.1.1601.8
fig|11428.3.peg.5347	0.015923	48.62	CFYQHLAPGGR	Carbamidomethyl(C)@1		0.00676228	1304.62	435.879	1304.61	435.877	3	9	2.1.1.1635.6
fig|11428.3.peg.4413	2	99	VIGDTDQTGTITR			-0.00468341	1375.69	688.852	1375.69	688.854	2	13	2.1.1.1555.24
fig|11428.3.peg.4413	0.419075	97.63	HPNPQFEGQTK			0.00430755	1281.61	428.212	1281.61	428.211	3	8	2.1.1.1422.5
fig|11428.3.peg.4413	0.177832	92.76	DADSNLTGEDVR			-0.00206492	1290.57	646.291	1290.57	646.292	2	6	4.1.1.1549.19
fig|11428.3.peg.4413	0.00966115	36.46	SALEVSSLPGK			-0.0121119	1086.58	544.297	1086.59	544.303	2	9	2.1.1.1673.13
fig|11428.3.peg.5277	2	99	VFQEADGTGTGTFK			-0.00174244	1456.68	729.348	1456.68	729.349	2	13	2.1.1.1642.17
fig|11428.3.peg.5277	0.61261	98.75	AFHAAEPMMDR			-0.000121489	1274.55	425.858	1274.55	425.858	3	10	5.1.1.1651.3
fig|1428.368.peg.5482	2	99	ASGAGGQHINTTDSAVR			-0.00134994	1640.79	547.936	1640.79	547.936	3	15	2.1.1.1409.10
fig|1428.368.peg.5482	0.632644	98.8	ITHTPTNTVVTCQSER	Carbamidomethyl(C)@12		0.00315078	1842.89	615.305	1842.89	615.304	3	10	2.1.1.1492.26
fig|1428.368.peg.5105; fig|11428.3.peg.1735	2	99	DIDVVVGPEAR			-0.00213863	1168.61	585.311	1168.61	585.312	2	12	5.1.1.1806.10
fig|1428.368.peg.5105; fig|11428.3.peg.1735	0.628932	98.8	AATDAIVEYAK			-0.0105799	1150.58	576.295	1150.59	576.301	2	13	4.1.1.1707.6
fig|11428.3.peg.4529	2	99	INVNTENQIEFTK			-0.00421794	1548.77	775.394	1548.78	775.396	2	18	1.1.1.1607.26
fig|11428.3.peg.4529	0.314258	96.34	EVLNKDQEVYDPR		missed K-D@5	4.46695e-05	1603.78	802.899	1603.78	802.899	2	11	1.1.1.1465.15
fig|11428.3.peg.4529	0.298432	96.07	EVLNKDQEVYDPRK		missed K-D@5; missed R-K@13	0.00304653	1731.88	433.978	1731.88	433.977	4	12	3.1.1.1593.7
fig|11428.3.peg.4529	0.0222764	74.7	QVVEYAHAR	Gln->pyro-Glu@N-term		0.0173457	1054.54	528.276	1054.52	528.267	2	11	3.1.1.1645.9
fig|11428.3.peg.4529	0.0105502	38.35	TVVAMVK			-0.00287726	746.433	374.224	746.436	374.225	2	7	2.1.1.1546.2
fig|1428.368.peg.2790; fig|11428.3.peg.3464	2	99	FGSDINLEYNGK			-0.00295215	1355.63	678.824	1355.64	678.825	2	17	5.1.1.1825.21
fig|1428.368.peg.2790; fig|11428.3.peg.3464	0.66354	99	PATLLVNTASK		cleaved R-P@N-term	-0.000109586	1113.64	557.827	1113.64	557.827	2	13	5.1.1.1687.12
fig|11428.3.peg.1486	2	99	VIPETEEEKELHR		missed K-E@9	-0.00360291	1607.81	804.913	1607.82	804.915	2	14	6.1.1.1417.25
fig|11428.3.peg.1486	0.316953	96.32	VVAEDLISGEKR		missed K-R@11	-0.00050816	1314.71	439.245	1314.71	439.245	3	12	4.1.1.1649.4
fig|11428.3.peg.1486	0.299296	96.03	VVAEDLISGEK			-0.00284751	1158.61	580.312	1158.61	580.314	2	12	6.1.1.1565.14
fig|11428.3.peg.1486	0.0525663	75.87	TSMEVFVK			-0.00148601	939.472	470.743	939.474	470.744	2	10	4.1.1.1710.3
fig|11428.3.peg.3161	2	99	LGEEIKDVEK		missed K-D@6	-0.00214354	1158.61	580.313	1158.61	580.314	2	15	2.1.1.1555.20
fig|11428.3.peg.3161	0.521434	98.25	FIHSVLPK			-0.00103861	939.553	470.784	939.554	470.784	2	11	2.1.1.1604.8
fig|11428.3.peg.3161	0.173925	92.26	IAPSILSADFSK			-0.00867918	1247.67	624.841	1247.68	624.845	2	16	4.1.1.1894.7
fig|11428.3.peg.3161	0.00833099	31.95	IKQVADMVK		missed K-Q@2	0.00131234	1030.59	516.3	1030.58	516.299	2	9	6.1.1.1406.15
fig|11428.3.peg.1871	2	99	SSGTFQGTIYTR			-0.000481358	1316.64	659.325	1316.64	659.325	2	15	2.1.1.1656.22
fig|11428.3.peg.1871	0.703335	98.98	ATGDYFVER			0.00529847	1056.49	529.254	1056.49	529.251	2	9	5.1.1.1705.14
fig|11428.3.peg.1871	0.00921731	33.83	TDSLFMAHTGNTVGMR			-0.00576808	1736.79	869.403	1736.8	869.406	2	9	2.1.1.1753.10
fig|11428.3.peg.1871	0.00524306	23.14	NMPIGTSATNR			-0.00139436	1160.56	581.287	1160.56	581.288	2	7	5.1.1.1586.20
fig|11428.3.peg.4757	2	99	VTDVIITHAHADR			-0.00190555	1446.76	362.696	1446.76	362.697	4	11	1.1.1.1415.2
fig|11428.3.peg.4757	0.714443	99	AHSTALTAELAK			0.0199326	1211.67	404.898	1211.65	404.891	3	11	2.1.1.1564.7
fig|1428.368.peg.2716	2	99	ITGGTVQNIIAEK			-0.00332073	1342.74	672.378	1342.75	672.38	2	22	1.1.1.1619.11
fig|1428.368.peg.2716	0.725842	99	LKPDEEVIEK			0.00420177	1198.65	600.332	1198.64	600.33	2	11	3.1.1.1576.10
fig|11428.3.peg.3970	2	99	VNNIGPGAINTPINAEK			-0.00572162	1720.91	861.46	1720.91	861.463	2	14	5.1.1.1809.25
fig|11428.3.peg.3970	0.69897	98.96	SRESEANDVLEEIKK		missed R-E@2; missed K-K@14	-0.0139406	1745.87	582.962	1745.88	582.967	3	18	6.1.1.1557.11
fig|11428.3.peg.3970	0.0273344	60.44	ESEANDVLEEIKK		missed K-K@12	0.00217565	1502.75	501.923	1502.75	501.923	3	9	4.1.1.1762.7
fig|11428.3.peg.3970	0.00877392	32.44	VGGEAIAVK			-0.00281266	842.483	422.249	842.486	422.25	2	7	4.1.1.1496.3
fig|11428.3.peg.4665	2	99	RGEGPTLIETVSYR		missed R-G@1	-0.00570202	1576.82	789.415	1576.82	789.418	2	21	1.1.1.1616.6
fig|11428.3.peg.4665	0.692504	98.93	LTAHSSDDDDRVYR		missed R-V@11	0.00605404	1648.75	550.591	1648.74	550.589	3	10	3.1.1.1484.7
fig|11428.3.peg.4665	0.0264104	59.83	YAISIPVEK			-0.00610253	1018.56	510.289	1018.57	510.292	2	10	3.1.1.1833.3
fig|11428.3.peg.4665	0.0190881	51.27	EAGVLTEESEK			-0.00304746	1190.56	596.289	1190.57	596.291	2	8	2.1.1.1512.22
fig|11428.3.peg.4665	0.0168249	48.06	LTAHSSDDDDRVYRDKEEVEEAK		missed R-V@11; missed R-D@14; missed K-E@16	0.00586065	2706.24	677.568	2706.24	677.567	4	10	3.1.1.1563.24
fig|11428.3.peg.3401	2	99	VVIITGGSSGMGK			-0.0118234	1204.64	603.326	1204.65	603.332	2	15	3.1.1.1689.15
fig|11428.3.peg.3401	0.779892	99	MIEQIDEK			0.00101744	1004.49	503.25	1004.48	503.25	2	9	2.1.1.1542.8
fig|11428.3.peg.3401	0.00568285	23.4	TLAVEWGR			0.0017359	930.494	466.254	930.492	466.253	2	9	2.1.1.1752.4
fig|1428.368.peg.3819; fig|11428.3.peg.2126	2	99	VNDCFHTVTVEGTSVVNDTK	Carbamidomethyl(C)@4		0.00506339	2221.04	741.353	2221.03	741.351	3	21	4.1.1.1771.18
fig|1428.368.peg.3819; fig|11428.3.peg.2126	0.79588	99	NFNEYHIIDRQDNVVTVR		missed R-Q@10	0.000843462	2231.11	744.71	2231.11	744.71	3	14	5.1.1.1823.21
fig|11428.3.peg.4721	2	99	LAQEELHAFCK	Carbamidomethyl(C)@10		0.00705415	1344.66	673.336	1344.65	673.332	2	17	6.1.1.1509.14
fig|11428.3.peg.4721	0.809668	99	ESGVSREELFITSK		missed R-E@6	0.00543634	1580.81	791.412	1580.8	791.41	2	13	6.1.1.1568.20
fig|1428.368.peg.3868; fig|11428.3.peg.3244	1.60206	99	ATAVVGTHTHVPTADNR			0.00124735	1745.88	582.968	1745.88	582.968	3	11	1.1.1.1371.21
fig|1428.368.peg.3868; fig|11428.3.peg.3244	1.10791	99	PANFPEGTPGK		cleaved R-P@N-term	0.00142809	1113.55	557.781	1113.55	557.78	2	9	2.1.1.1548.19
fig|1428.368.peg.3868; fig|11428.3.peg.3244	0.123205	88.32	FLTNLPVR			-0.00321876	958.557	480.286	958.56	480.287	2	9	2.1.1.1800.2
fig|11428.3.peg.1706	1.85387	99	DGHDVYAVQADVSK			-0.00161562	1502.7	752.356	1502.7	752.357	2	10	5.1.1.1665.21
fig|11428.3.peg.1706	0.958607	99	EAAENLVNELGK			-0.00169398	1285.65	643.832	1285.65	643.833	2	13	5.1.1.1859.10
fig|11428.3.peg.1706	0.0163737	47.06	FGQADEIAK			0.0110136	977.493	489.754	977.482	489.748	2	7	2.1.1.1535.14
fig|11428.3.peg.2113	2	99	SIDILSGDKEAIQLNK		missed K-E@9	0.000491383	1742.94	581.988	1742.94	581.988	3	21	2.1.1.1838.6
fig|11428.3.peg.2113	0.856985	99	YTISFNKPGK			-0.000374599	1153.61	385.545	1153.61	385.545	3	12	6.1.1.1494.3
fig|11428.3.peg.1077	2	99	LYASCGDGFMGGPDR	Carbamidomethyl(C)@5		-0.000198915	1601.66	801.837	1601.66	801.837	2	16	5.1.1.1817.11
fig|11428.3.peg.1077	0.872895	99	TQHPHALFVTSS			-0.00169714	1323.66	662.835	1323.66	662.836	2	12	6.1.1.1471.17
fig|11428.3.peg.1077	0.0150229	44.78	VYCGTFGR	Carbamidomethyl(C)@3		0.00359884	958.437	480.226	958.433	480.224	2	7	2.1.1.1563.7
fig|11428.3.peg.1077	0.00744648	27.88	LFLCMER	Carbamidomethyl(C)@4		0.015369	967.477	484.746	967.462	484.738	2	9	5.1.1.1889.2
fig|11428.3.peg.5848	2	99	AHLLVHHEVAHER			0.000890536	1546.81	387.71	1546.81	387.71	4	14	2.1.1.1378.3
fig|11428.3.peg.5848	0.863279	99	YGLVGGHTEDLNYYGGFRK		missed R-K@18	0.00248818	2145.03	537.265	2145.03	537.264	4	14	5.1.1.1849.4
fig|11428.3.peg.5848	0.0291884	61.28	IFSDGSFGGR			-0.0015965	1041.49	521.75	1041.49	521.751	2	9	5.1.1.1744.12
fig|11428.3.peg.5848	0.0163737	46.53	ALQTAIKDCWK	Carbamidomethyl(C)@9	missed K-D@7	-0.00467955	1332.68	445.234	1332.69	445.236	3	11	1.1.1.1543.3
fig|11428.3.peg.406	2	99	TLLAGGIQR			-0.00221171	927.548	464.781	927.55	464.782	2	15	5.1.1.1697.4
fig|11428.3.peg.406	0.906578	99	CTISNCIPR	Carbamidomethyl(C)@1; Carbamidomethyl(C)@6		0.0205523	1119.54	560.776	1119.52	560.766	2	10	2.1.1.1606.16
fig|11428.3.peg.458	2	99	FVHTANSAATLR			0.000993507	1286.67	429.899	1286.67	429.898	3	12	6.1.1.1381.7
fig|11428.3.peg.458	0.928118	99	ANAYGHDYVPVAK			0.00678704	1403.69	468.904	1403.68	468.902	3	11	4.1.1.1571.8
fig|11428.3.peg.458	0.00656377	26.13	LWDGSSVMK			0.000108466	1021.49	511.752	1021.49	511.752	2	8	5.1.1.1778.7
fig|11428.3.peg.458	0.00568285	23.03	GDGISYNVTYR			-0.000800602	1243.58	622.798	1243.58	622.799	2	10	6.1.1.1547.12
fig|11428.3.peg.608	1.65758	99	TAILPGESNER			0.00707704	1185.61	593.81	1185.6	593.807	2	11	4.1.1.1579.14
fig|11428.3.peg.608	0.598599	98.52	NITGISFQR			-0.00025547	1034.55	518.283	1034.55	518.283	2	12	6.1.1.1594.5
fig|11428.3.peg.608	0.493495	97.93	TFLDIR			0.00256567	763.425	382.72	763.423	382.719	2	8	4.1.1.1797.2
fig|11428.3.peg.608	0.221849	93.73	IIAYYDETVK			0.000182952	1213.62	607.819	1213.62	607.819	2	11	2.1.1.1718.17
fig|11428.3.peg.3658	2	99	AADDVAPQGAFLYR			0.00110706	1492.73	747.373	1492.73	747.373	2	17	5.1.1.1884.11
fig|11428.3.peg.3658	0.621602	98.61	VLLPTENPAA			-0.000903744	1023.56	512.787	1023.56	512.787	2	12	5.1.1.1852.6
fig|11428.3.peg.3658	0.202732	92.99	LSDQVYEMSIDADK			0.00382715	1612.73	807.374	1612.73	807.372	2	12	4.1.1.1813.17
fig|11428.3.peg.3658	0.170696	91.48	LSDQVYEMSIDADKATPEAPDKWATK		missed K-A@14; missed K-W@22	0.00834968	2908.39	728.104	2908.38	728.102	4	13	4.1.1.1866.12
fig|11428.3.peg.1286	2	99	VSIQHVTHIHPQSEIQK			0.0028512	1980.06	496.022	1980.05	496.021	4	21	1.1.1.1445.5
fig|11428.3.peg.1286	0.970616	99	LAELISGNK			-0.0110194	943.523	472.769	943.534	472.774	2	10	4.1.1.1604.13
fig|11428.3.peg.1286	0.0362122	65.94	ILVTGGAGFIGR			-0.00128322	1159.67	580.842	1159.67	580.843	2	11	2.1.1.1831.11
fig|11428.3.peg.5473	2	99	IGNGKDSIDQLVESK	Deamidated(N)@3	missed K-D@5	-0.0044865	1602.81	535.276	1602.81	535.277	3	16	2.1.1.1762.12
fig|11428.3.peg.5473	1.02228	99	FVYLTTTVK			0.000182472	1070.6	536.308	1070.6	536.308	2	13	1.1.1.1634.4
fig|11428.3.peg.5473	0.00744648	27.6	QATEEIYMTPSIK			0.000788601	1509.74	755.877	1509.74	755.877	2	8	2.1.1.1778.19
fig|11428.3.peg.311	2	99	NEESICQQFAR	Carbamidomethyl(C)@6	cleaved V-N@N-term	7.56248e-05	1380.61	691.312	1380.61	691.312	2	16	5.1.1.1732.18
fig|11428.3.peg.311	1.02687	99	IIGGQEGFAGGK			0.00815137	1132.6	567.305	1132.59	567.301	2	13	2.1.1.1595.12
fig|11428.3.peg.898	2	99	QYSLSDAPGKEYYR	Gln->pyro-Glu@N-term	missed K-E@10	-0.00735666	1658.75	830.382	1658.76	830.386	2	14	2.1.1.1783.21
fig|11428.3.peg.898	1.04576	99	AYTCYSAPTEKDLEMK	Carbamidomethyl(C)@4	missed K-D@11	0.00708918	1905.86	636.293	1905.85	636.29	3	14	6.1.1.1564.10
fig|11428.3.peg.898	0.0195421	49.92	NFVIVK			-0.00215283	718.436	360.225	718.438	360.226	2	8	4.1.1.1660.2
fig|11428.3.peg.1091	2	99	IQVQFLDTANK			0.00174753	1275.68	638.849	1275.68	638.848	2	17	2.1.1.1816.5
fig|11428.3.peg.1091	1.10791	99	YTGEFENIK			-0.00066405	1099.52	550.766	1099.52	550.767	2	13	2.1.1.1647.6
fig|11428.3.peg.1091	0.00966115	32.37	ELLMASLEK			0.00269235	1032.56	517.285	1032.55	517.284	2	9	4.1.1.1839.2
fig|1428.368.peg.4152; fig|11428.3.peg.3708	2	99	FGLLQTVADVLK			0.00125604	1302.76	652.385	1302.75	652.385	2	21	6.1.1.2362.2
fig|1428.368.peg.4152; fig|11428.3.peg.3708	1.16115	99	LLLKEDSIPK		missed K-E@4	0.000840145	1154.69	385.905	1154.69	385.904	3	12	6.1.1.1525.3
fig|11428.3.peg.2287	1.72125	99	EGANVAIAYLDEEEDAKETK		missed K-E@17	-8.23274e-05	2194.03	732.35	2194.03	732.35	3	15	4.1.1.1870.19
fig|11428.3.peg.2287	1.45593	99	NVLITGGDSGIGR			-0.00166056	1257.67	629.84	1257.67	629.841	2	11	2.1.1.1702.10
fig|11428.3.peg.2945	2	99	ILTFYDTPGHAK			-0.00871456	1361.69	681.852	1361.7	681.856	2	15	6.1.1.1558.10
fig|11428.3.peg.2945	0.920819	99	CPNATLYVHSR	Carbamidomethyl(C)@1		-0.00614418	1316.62	439.882	1316.63	439.884	3	13	6.1.1.1415.8
fig|11428.3.peg.2945	0.187755	92.06	ALQTLLMDK			-0.0147357	1031.55	516.784	1031.57	516.792	2	14	2.1.1.1808.4
fig|11428.3.peg.2945	0.0746879	80.14	HMIDPTK			0.00154205	840.418	421.216	840.416	421.215	2	7	1.1.1.1290.5
fig|11428.3.peg.2945	0.00921731	31.91	IVQHGDTLK			-0.00211978	1009.55	505.784	1009.56	505.785	2	6	1.1.1.1265.6
fig|11428.3.peg.1085	2	99	LAVPWAWVLR			-0.00135104	1209.7	605.858	1209.7	605.858	2	17	1.1.1.2703.2
fig|11428.3.peg.1085	1.1549	99	LLEANIQLDGSSYK			-0.00237659	1549.8	775.905	1549.8	775.907	2	14	4.1.1.1838.17
fig|11428.3.peg.1085	0.0705811	78.99	SMSFWR			0.00310053	812.367	407.191	812.364	407.189	2	7	4.1.1.1802.2
fig|11428.3.peg.1295	2	99	TVQHVINLPYQPIK			-0.00175347	1648.93	825.471	1648.93	825.472	2	17	4.1.1.1815.20
fig|11428.3.peg.1295	1.25181	99	DDNTLSVINTATK			-0.00154933	1390.69	696.354	1390.69	696.354	2	13	4.1.1.1759.23
fig|1428.368.peg.5573; fig|11428.3.peg.4996	2	99	LTELVNILTK			-0.00258067	1142.69	572.351	1142.69	572.353	2	17	1.1.1.2058.3
fig|1428.368.peg.5573; fig|11428.3.peg.4996	1.16749	99	SMAATAIEAK			0.000747846	991.502	496.758	991.501	496.758	2	10	6.1.1.1417.16
fig|1428.368.peg.5573; fig|11428.3.peg.4996	0.0909791	83.2	SMAATAIEAKDR		missed K-D@10	0.0125549	1262.64	421.888	1262.63	421.884	3	8	6.1.1.1393.4
fig|1428.368.peg.421; fig|11428.3.peg.1668	2	99	NVDKHETIVK		missed K-H@4	0.000364977	1181.64	394.887	1181.64	394.887	3	14	3.1.1.1419.2
fig|1428.368.peg.421; fig|11428.3.peg.1668	1.23657	99	TDYNVEDVKK		missed K-K@9	0.000771563	1209.59	404.203	1209.59	404.203	3	14	5.1.1.1565.2
fig|1428.368.peg.421; fig|11428.3.peg.1668	0.0783135	80.65	LENKGSLNIKK		missed K-G@4; missed K-K@10	-0.00267542	1242.73	415.25	1242.73	415.25	3	7	3.1.1.1466.4
fig|11428.3.peg.3554	2	99	EREIEVEFIEEDANAPHPNTAR		missed R-E@2	0.00424752	2565.21	642.311	2565.21	642.31	4	17	4.1.1.1799.12
fig|11428.3.peg.3554	1.31876	99	HEINISTMSVSR			-0.00123152	1372.68	687.345	1372.68	687.346	2	12	6.1.1.1517.20
fig|11428.3.peg.1609	2	99	IIPVNPTVDEVLGEK			0.00442719	1621.9	811.956	1621.89	811.954	2	16	6.1.1.1988.14
fig|11428.3.peg.1609	1.33724	99	TIAVVGLSDKPER			0.00148296	1383.77	462.265	1383.77	462.265	3	14	6.1.1.1514.7
fig|1428.368.peg.4818; fig|11428.3.peg.3287	1.85387	99	SGIGPVIDNPIR			-0.000369333	1236.68	619.348	1236.68	619.349	2	14	3.1.1.1836.15
fig|1428.368.peg.4818; fig|11428.3.peg.3287	1.14267	99	LTTFIHEYSK			-0.0151463	1237.62	619.817	1237.63	619.824	2	14	1.1.1.1534.5
fig|1428.368.peg.4818; fig|11428.3.peg.3287	0.355561	96.35	VFIKPAMER			-0.00014137	1089.6	364.207	1089.6	364.207	3	9	1.1.1.1475.4
fig|1428.368.peg.4818; fig|11428.3.peg.3287	0.032452	61.81	GILDQGMK			0.0124153	860.455	431.235	860.443	431.229	2	7	2.1.1.1641.3
fig|1428.368.peg.4818; fig|11428.3.peg.3287	0.00524306	19.54	TINETFLK			-0.00165923	964.521	483.268	964.523	483.269	2	9	2.1.1.1713.2
fig|1428.368.peg.1048	2	99	MRDIANQSANGTNTADNQQALQK	Deamidated(Q)@7	missed R-D@2	0.00627023	2489.16	830.728	2489.16	830.726	3	14	5.1.1.1604.26
fig|1428.368.peg.1048	1.42022	99	IQTLDSADTNK			0.00217361	1204.6	603.305	1204.59	603.304	2	10	3.1.1.1539.15
fig|1428.368.peg.6300; fig|11428.3.peg.1988	2	99	LSNISHAVQTHAEENGFSIVR	Deamidated(N)@15		0.013559	2309.15	578.296	2309.14	578.292	4	21	5.1.1.1818.7
fig|1428.368.peg.6300; fig|11428.3.peg.1988	0.847712	99	IVALTHQELK			-0.0165164	1150.65	384.559	1150.67	384.564	3	11	3.1.1.1624.3
fig|1428.368.peg.6300; fig|11428.3.peg.1988	0.525784	98	SLYLGLEQVKPGER			0.00103367	1587.86	530.295	1587.86	530.295	3	12	4.1.1.1792.9
fig|1428.368.peg.6300; fig|11428.3.peg.1988	0.0385789	65.93	YGATPSFK			-0.0060842	869.422	435.718	869.428	435.721	2	7	2.1.1.1563.4
fig|11428.3.peg.1478	2	99	GSLDESVIQLLNDKEGFVR		missed K-E@14	-0.00644024	2118.09	707.037	2118.1	707.039	3	20	6.1.1.2185.2
fig|11428.3.peg.1478	1.05552	99	FLGNIYK			-0.00238178	853.467	427.741	853.47	427.742	2	9	4.1.1.1722.6
fig|11428.3.peg.1478	0.304518	95.41	VVYVEEMK			0.0064283	995.506	498.76	995.5	498.757	2	8	4.1.1.1636.10
fig|11428.3.peg.1478	0.0680339	77.65	VDILEYK			-0.00909035	878.466	440.24	878.475	440.245	2	8	5.1.1.1810.4
fig|11428.3.peg.1478	0.0145735	40.85	VFFTIK			-0.002566	753.44	377.727	753.443	377.729	2	6	4.1.1.1834.2
fig|11428.3.peg.4563	2	99	VTVLSSSAEEANHIDIHR			0.00229901	1976.99	495.256	1976.99	495.255	4	16	4.1.1.1692.5
fig|11428.3.peg.4563	1.36653	99	LQDKQAHVDFKR		missed K-Q@4; missed K-R@11	0.00202316	1483.79	495.604	1483.79	495.604	3	10	6.1.1.1321.11
fig|11428.3.peg.4563	0.0777937	80.14	LNVSDMK			0.00107857	805.401	403.708	805.4	403.707	2	7	4.1.1.1549.8
fig|11428.3.peg.3616	2	99	NMLEIEKNGDGESVNP	Deamidated(N)@8	missed K-N@7	0.00424139	1745.78	873.898	1745.78	873.896	2	15	4.1.1.1765.19
fig|11428.3.peg.3616	1.36653	99	LAAPLVK			-0.00081857	710.468	356.241	710.469	356.242	2	9	4.1.1.1584.2
fig|11428.3.peg.3616	0.0856568	81.66	FVTFLDK			-0.000966162	868.468	435.241	868.469	435.242	2	10	5.1.1.1892.2
fig|11428.3.peg.541	1.79588	99	EVSYILQDASSK			0.00770464	1338.67	670.345	1338.67	670.341	2	14	3.1.1.1773.3
fig|11428.3.peg.541	1.52288	99	TAHALLEEGVR			0.00207414	1194.64	399.22	1194.64	399.219	3	11	2.1.1.1573.3
fig|11428.3.peg.541	0.123782	86.97	AVESTVAIIER			0.00975781	1186.67	594.34	1186.66	594.335	2	9	4.1.1.1719.17
fig|11428.3.peg.541	0.0400052	66.29	AGSAGTPCFSHEVR	Carbamidomethyl(C)@8		0.000207754	1474.66	492.562	1474.66	492.561	3	9	3.1.1.1590.10
fig|11428.3.peg.1419	2	99	AGDALLEPIQR			-0.00450857	1181.64	591.825	1181.64	591.828	2	15	5.1.1.1819.14
fig|11428.3.peg.1419	1.26761	99	HITLDVAK			-0.000367573	895.512	448.764	895.513	448.764	2	13	2.1.1.1544.5
fig|11428.3.peg.1419	0.238824	93.67	IQETNKESMLR		missed K-E@6	-0.00913301	1347.67	450.231	1347.68	450.234	3	8	6.1.1.1366.12
fig|11428.3.peg.1419	0.0145735	40.59	IVIGGGVSK			-0.00211475	828.505	415.26	828.507	415.261	2	7	2.1.1.1547.3
fig|1428.368.peg.6327; fig|11428.3.peg.1961	2	99	GALDTAGVDKR		missed K-R@10	-0.0017293	1101.58	551.795	1101.58	551.796	2	10	4.1.1.1456.10
fig|1428.368.peg.6327; fig|11428.3.peg.1961	1.5376	99	PTINQLVR		cleaved M-P@N-term	-0.000602004	939.549	470.782	939.55	470.782	2	13	6.1.1.1543.4
fig|11428.3.peg.4423	2	99	VDERDETGGYLLTR		missed R-D@4	0.0219026	1622.81	541.945	1622.79	541.937	3	16	2.1.1.1689.11
fig|11428.3.peg.4423	1.5376	99	LEYHNLMNSVK			0.00556057	1346.67	674.343	1346.67	674.34	2	14	6.1.1.1552.10
fig|11428.3.peg.2193	2	99	IFESYDENVSDLLAILK			0.00503014	1968.01	985.014	1968.01	985.012	2	24	6.1.1.2540.2
fig|11428.3.peg.2193	1.01773	99	ELHIIVQPK			5.42421e-05	1075.64	538.827	1075.64	538.827	2	13	5.1.1.1697.7
fig|11428.3.peg.2193	0.482804	97.61	VIFQGEGGAK			0.000933085	1004.53	503.272	1004.53	503.272	2	10	4.1.1.1551.12
fig|11428.3.peg.2193	0.0540393	72.67	YELNYFR			0.000482671	1003.48	502.746	1003.48	502.745	2	8	4.1.1.1815.8
fig|11428.3.peg.2193	0.034328	62.17	IGMVEYK			-0.0004366	838.425	420.22	838.426	420.22	2	10	2.1.1.1609.3
fig|11428.3.peg.1397	2	99	ALHHIVHHPQLMHVPK			0.00494035	1893.04	474.266	1893.03	474.265	4	20	1.1.1.1410.4
fig|11428.3.peg.1397	1.25964	99	LQVLHINDSK			0.00242202	1165.65	389.557	1165.65	389.556	3	11	2.1.1.1620.4
fig|11428.3.peg.1397	0.347754	96.05	RKPIEELNIEAGRK		missed R-K@1; missed R-K@13	0.00329994	1651.94	413.992	1651.94	413.992	4	10	4.1.1.1549.9
fig|1428.368.peg.4754	2	99	TAPVDKNDDGYKLMQK		missed K-N@6; missed K-L@12	0.00251889	1821.9	608.306	1821.89	608.305	3	20	6.1.1.1423.18
fig|1428.368.peg.4754	1.63827	99	KPNIPKDYSEYPGK		missed K-D@6	-0.00142996	1634.83	545.95	1634.83	545.951	3	12	6.1.1.1425.13
fig|1428.368.peg.1351; fig|11428.3.peg.5416	2	99	FASVCINPTWVK	Carbamidomethyl(C)@5		-0.000133832	1420.72	711.366	1420.72	711.366	2	19	4.1.1.1933.5
fig|1428.368.peg.1351; fig|11428.3.peg.5416	1.27572	99	VIIETCLLTDEEKVR	Carbamidomethyl(C)@6	missed K-V@13	-0.0273879	1816.93	606.652	1816.96	606.661	3	15	4.1.1.1877.7
fig|1428.368.peg.1351; fig|11428.3.peg.5416	0.318759	95.54	LIDHTILK			-0.000866338	951.574	476.795	951.575	476.795	2	12	3.1.1.1634.4
fig|1428.368.peg.1351; fig|11428.3.peg.5416	0.0486625	69.98	DIYEVVQAAK			-0.000868604	1134.59	568.303	1134.59	568.303	2	9	4.1.1.1832.8
fig|1428.368.peg.1351; fig|11428.3.peg.5416	0.00877392	29.09	TVGPNVGVK			-0.00283367	869.494	435.754	869.497	435.756	2	6	4.1.1.1495.7
fig|11428.3.peg.39	2	99	IIATCQPQNTPSYR	Carbamidomethyl(C)@5		-0.000670397	1647.8	824.909	1647.8	824.909	2	15	1.1.1.1478.25
fig|11428.3.peg.39	1.67778	99	NFVNENIGENAK			-0.00425725	1347.64	674.826	1347.64	674.828	2	14	3.1.1.1691.19
fig|1428.368.peg.6313; fig|11428.3.peg.1975	1.4437	99	TITVLVETYK			0.00216171	1165.66	583.838	1165.66	583.837	2	14	5.1.1.1892.6
fig|1428.368.peg.6313; fig|11428.3.peg.1975	1.18046	99	IMETRPLSATKR		missed K-R@11	0.00528175	1401.78	351.453	1401.78	351.451	4	10	3.1.1.1518.2
fig|1428.368.peg.6313; fig|11428.3.peg.1975	1.07058	99	IMETRPLSATK			-0.00086498	1245.67	623.844	1245.68	623.845	2	13	5.1.1.1570.19
fig|11428.3.peg.4272	1.82391	99	IDTGCLVAMTK	Carbamidomethyl(C)@5		-0.000645276	1207.59	604.804	1207.59	604.804	2	14	2.1.1.1795.6
fig|11428.3.peg.4272	1.34679	99	IIPVDLTEYQGK			0.00580865	1374.75	688.38	1374.74	688.377	2	14	5.1.1.1935.5
fig|11428.3.peg.4272	0.492144	97.62	HVSFAAPYPGK			0.00615821	1172.6	391.875	1172.6	391.873	3	12	6.1.1.1489.5
fig|11428.3.peg.4272	0.0371573	63.36	LEGDGLAFMHAGGTVYKR		missed K-R@17	0.00832323	1920.96	481.247	1920.95	481.245	4	10	2.1.1.1776.6
fig|1428.368.peg.3921	2	99	TPYAVVQLR			-0.000860973	1045.59	523.803	1045.59	523.803	2	14	3.1.1.1780.13
fig|1428.368.peg.3921	1.24413	99	LMDSVIIR			5.08895e-06	945.532	473.773	945.532	473.773	2	10	5.1.1.1828.4
fig|1428.368.peg.3921	0.471083	97.44	AADECSVPAGGALAVDRHEFAAK	Carbamidomethyl(C)@5	missed R-H@17	0.0018256	2341.11	586.286	2341.11	586.285	4	12	2.1.1.1705.15
fig|11428.3.peg.1554	2	99	GYQHLNGEQALALAR	Deamidated(N)@6		-0.00263303	1640.82	547.949	1640.83	547.95	3	16	2.1.1.1771.7
fig|11428.3.peg.1554	1.22185	99	TDALLLATINKDDK		missed K-D@11	-0.00767649	1529.82	510.948	1529.83	510.951	3	14	2.1.1.1813.7
fig|11428.3.peg.1554	0.482804	97.52	ITHAHVFGGVESTR			-0.00272153	1509.77	504.263	1509.77	504.264	3	10	1.1.1.1415.11
fig|11428.3.peg.1554	0.0190881	46.27	VYIPTR			-0.00416673	747.424	374.719	747.428	374.721	2	6	2.1.1.1564.3
fig|11428.3.peg.1554	0.00921731	97.88	KLNDHLGVTPK		missed K-L@1	0.987529	1221.68	408.232	1220.69	407.903	3	10	6.1.1.1362.6
fig|1428.368.peg.6219; fig|11428.3.peg.5981	2	99	KLGLTNTFEAGK		missed K-L@1	-0.00477885	1277.69	639.854	1277.7	639.856	2	16	6.1.1.1513.17
fig|1428.368.peg.6219; fig|11428.3.peg.5981	1.45593	99	TKPSKDVVDVGTR		missed K-D@5	-0.00205106	1400.76	467.927	1400.76	467.928	3	10	6.1.1.1316.7
fig|1428.368.peg.6219; fig|11428.3.peg.5981	0.145087	88.4	DKNIAMAQAFTAK		missed K-N@2	-0.0110416	1407.71	704.861	1407.72	704.866	2	14	5.1.1.1758.16
fig|1428.368.peg.6219; fig|11428.3.peg.5981	0.0893756	81.46	ADNKNQAITIK		missed K-N@4	0.0071388	1214.67	405.897	1214.66	405.895	3	7	5.1.1.1506.3
fig|1428.368.peg.6219; fig|11428.3.peg.5981	0.0486625	99	LGLTNTFEAGK			-0.0260821	1149.58	575.796	1149.6	575.809	2	15	4.1.1.1749.8
fig|11428.3.peg.4522	2	99	ITQIYEGTSEIQK			-0.00173653	1508.77	755.393	1508.77	755.393	2	18	3.1.1.1715.12
fig|11428.3.peg.4522	1.65758	99	VAMANLDVGR			0.0127583	1044.55	523.283	1044.54	523.277	2	12	2.1.1.1689.10
fig|11428.3.peg.4522	0.094744	82.33	FNEEQQMMR			-0.00475061	1211.5	606.758	1211.51	606.76	2	9	3.1.1.1647.19
fig|1428.368.peg.2907	2	99	VLREEEAPKEYVVR		missed R-E@3; missed K-E@9	0.00560321	1715.93	572.983	1715.92	572.981	3	13	1.1.1.1457.19
fig|1428.368.peg.2907	1.76955	99	ILVINPGSTSTK			-0.00382844	1228.7	615.357	1228.7	615.359	2	14	6.1.1.1537.16
fig|1428.368.peg.4296; fig|11428.3.peg.4194	2	99	LASFKEPVFK		missed K-E@5	0.00205271	1164.66	389.226	1164.65	389.225	3	13	3.1.1.1763.2
fig|1428.368.peg.4296; fig|11428.3.peg.4194	1.72125	99	AVVTMDSHGNSLHADVDKTSLEK		missed K-T@18	0.00165404	2453.19	614.304	2453.19	614.304	4	15	6.1.1.1491.19
fig|1428.368.peg.4296; fig|11428.3.peg.4194	0.0491485	69.31	IYTPVGVNQLK			0.000784859	1230.7	616.356	1230.7	616.356	2	10	4.1.1.1756.14
fig|11428.3.peg.3139	2	99	LASDDVNDQVR			-0.00416899	1230.58	616.297	1230.58	616.299	2	14	2.1.1.1501.13
fig|11428.3.peg.3139	1.72125	99	AAIEGLEEGKQEGK		missed K-Q@10	0.00569699	1457.74	486.921	1457.74	486.919	3	10	2.1.1.1524.14
fig|11428.3.peg.3139	0.048177	68.94	ELGSSYIVVGR			-0.00789974	1178.62	590.318	1178.63	590.322	2	9	4.1.1.1769.13
fig|11428.3.peg.1854	2	99	LAEGIFDEEDLIFR			-0.000728177	1665.82	833.919	1665.82	833.92	2	18	6.1.1.2230.8
fig|11428.3.peg.1854	1.82391	99	GAVLHHPMVPR			-0.00408472	1212.65	405.224	1212.66	405.226	3	10	6.1.1.1379.2
fig|11428.3.peg.3835	2	99	AKEPTDTATIAK		missed K-E@2	0.00359198	1244.66	415.896	1244.66	415.894	3	12	5.1.1.1477.3
fig|11428.3.peg.3835	1.82391	99	MQFVSNVQYGK			0.00234234	1299.63	650.822	1299.63	650.821	2	13	5.1.1.1788.20
fig|11428.3.peg.3835	0.0199966	47.05	STEIEIMK			-0.0133791	949.466	475.74	949.479	475.747	2	8	4.1.1.1653.6
fig|11428.3.peg.1204	2	99	AEGVTAVTEPHISR			-0.00257082	1465.75	733.882	1465.75	733.884	2	13	3.1.1.1650.20
fig|11428.3.peg.1204	1.69897	99	AVLDVGNSGTTIR			-0.00142593	1301.69	651.854	1301.69	651.854	2	12	2.1.1.1690.16
fig|11428.3.peg.1204	0.170053	89.94	LVLQNVGMNPTR			0.00441926	1340.73	671.371	1340.72	671.369	2	12	3.1.1.1795.19
fig|11428.3.peg.1204	0.0195421	46.22	IEATDDGMIIYGK			0.0134815	1424.7	713.357	1424.69	713.35	2	9	2.1.1.1794.15
fig|11428.3.peg.1204	0.00877392	27.55	MLEAFGVK			0.00134176	893.469	447.742	893.468	447.741	2	7	2.1.1.1775.4
fig|11428.3.peg.651	2	99	INLHSCANDLEK	Carbamidomethyl(C)@6		-0.00340007	1412.67	707.341	1412.67	707.343	2	14	6.1.1.1459.23
fig|11428.3.peg.651	2	99	LGEHEIAQELIKK		missed K-K@12	-0.00229766	1506.84	503.287	1506.84	503.287	3	16	6.1.1.1541.9
fig|11428.3.peg.178	2	99	IYEMSSNQTFR			-0.00055822	1374.62	688.319	1374.62	688.319	2	13	4.1.1.1687.24
fig|11428.3.peg.178	2	99	MGEIFQGESPSR			-0.000575097	1336.61	669.311	1336.61	669.311	2	15	5.1.1.1755.18
fig|1428.368.peg.4705	2	99	AVGENIAGQKPK			-0.00184998	1210.67	404.562	1210.67	404.563	3	10	4.1.1.1415.4
fig|1428.368.peg.4705	2	99	LYGTGTPQDGDLER			8.79172e-05	1520.71	761.363	1520.71	761.363	2	12	6.1.1.1493.21
fig|1428.368.peg.5663; fig|11428.3.peg.5083	2	99	INSENMGQFER			-0.000371605	1323.59	662.801	1323.59	662.801	2	16	6.1.1.1493.15
fig|1428.368.peg.5663; fig|11428.3.peg.5083	2	99	MIHLAPNTSSTIVSK			-0.000128076	1597.85	799.932	1597.85	799.932	2	16	5.1.1.1750.21
fig|11428.3.peg.5782	2	99	ITSMGTPVIQER			-0.00113144	1330.69	666.352	1330.69	666.353	2	15	5.1.1.1735.19
fig|11428.3.peg.5782	2	99	MTAEPATLDRDTTDDAIYAAK		missed R-D@10	0.00351666	2268.06	757.028	2268.06	757.027	3	18	6.1.1.1594.16
fig|11428.3.peg.3945	2	99	KLEFFAQK		missed K-L@1	-0.000280388	1009.56	505.787	1009.56	505.787	2	12	2.1.1.1681.10
fig|11428.3.peg.3945	2	99	SWEEVEKDDLPAK		missed K-D@7	0.000835145	1544.74	773.376	1544.74	773.375	2	20	1.1.1.1573.23
fig|11428.3.peg.1287	2	99	AISPTNNYGATK			-0.00319873	1235.61	618.813	1235.61	618.815	2	11	2.1.1.1493.23
fig|11428.3.peg.1287	2	99	ENIKIEEIGLKPGEK		missed K-I@4	-0.000996685	1695.94	566.321	1695.94	566.321	3	19	1.1.1.1552.8
fig|11428.3.peg.2520	2	99	FSQASQFNVHR			0.00106793	1319.64	440.887	1319.64	440.886	3	14	6.1.1.1439.3
fig|11428.3.peg.2520	2	99	ININSTDPPEHR			0.00294619	1391.68	464.901	1391.68	464.9	3	11	6.1.1.1386.13
fig|1428.368.peg.4487; fig|11428.3.peg.718	2	99	GIVLTGGGALLR			-0.00146482	1125.69	563.85	1125.69	563.851	2	17	4.1.1.1889.2
fig|1428.368.peg.4487; fig|11428.3.peg.718	2	99	TPGNVVALRPMK			-0.0273828	1281.7	641.855	1281.72	641.869	2	14	5.1.1.1688.17
fig|11428.3.peg.3146	2	99	AITHEIENSLYTGR			-0.00618125	1602.79	802.404	1602.8	802.407	2	16	6.1.1.1560.14
fig|11428.3.peg.3146	2	99	TVYAGAEYVAPPAQHK			-0.0102667	1700.84	851.428	1700.85	851.433	2	16	6.1.1.1486.24
fig|11428.3.peg.1858	2	99	EVTAAVIEAVGANK			-0.00874209	1370.73	686.373	1370.74	686.378	2	16	2.1.1.1828.13
fig|11428.3.peg.1858	2	99	MSHHEIIGGQMPQAPSAIAAEGNVPR			0.00437797	2697.32	675.336	2697.31	675.335	4	20	5.1.1.1830.8
fig|1428.368.peg.5437; fig|11428.3.peg.435	2	99	DAAYHIIER			-0.00105686	1086.54	363.189	1086.55	363.189	3	11	5.1.1.1656.4
fig|1428.368.peg.5437; fig|11428.3.peg.435	2	99	VIGSGTTLDSAR			-0.000427213	1175.61	588.814	1175.61	588.815	2	12	4.1.1.1563.22
fig|1428.368.peg.4258	2	99	AMQALQPEMVK			-0.000251519	1244.63	623.32	1244.63	623.32	2	13	4.1.1.1702.18
fig|1428.368.peg.4258	2	99	LQQEMMQLYQK			-0.00364412	1438.69	720.353	1438.69	720.355	2	16	3.1.1.1808.7
fig|1428.368.peg.3886	2	99	DIGTNVIGGDAVK			-0.0111014	1257.65	629.83	1257.66	629.836	2	19	5.1.1.1782.7
fig|1428.368.peg.3886	2	99	IQQLGQTNVPQMNESR			0.00384545	1841.91	921.962	1841.91	921.96	2	15	3.1.1.1730.25
fig|1428.368.peg.3348; fig|11428.3.peg.4546	2	99	MEGEGFEAHVSEGQAVK			-0.00171202	1803.81	902.911	1803.81	902.912	2	13	1.1.1.1504.26
fig|1428.368.peg.3348; fig|11428.3.peg.4546	2	99	TNEETIVAPLTGAVK			-0.00436078	1541.83	771.92	1541.83	771.922	2	16	2.1.1.1842.7
fig|11428.3.peg.5230	2	99	AGSVGNSSLDLHYMVK			-0.00079146	1676.82	839.417	1676.82	839.417	2	18	5.1.1.1823.23
fig|11428.3.peg.5230	2	99	NAAGEVCLVGR	Carbamidomethyl(C)@7		-2.2097e-05	1144.57	573.29	1144.57	573.29	2	16	4.1.1.1625.19
fig|11428.3.peg.4779	2	99	IITFYPEHGVHPDHNAFGR			0.00777619	2206.08	552.527	2206.07	552.525	4	13	2.1.1.1737.7
fig|11428.3.peg.4779	2	99	SQTEAMLEDTHAK			0.000618696	1459.66	487.561	1459.66	487.561	3	11	3.1.1.1589.8
fig|11428.3.peg.4549	2	99	AIGSAHVTMAK			0.00462538	1084.57	543.295	1084.57	543.292	2	13	1.1.1.1363.3
fig|11428.3.peg.4549	2	99	AVYAAVEETTTCR	Carbamidomethyl(C)@12		0.000871481	1469.68	735.849	1469.68	735.848	2	13	5.1.1.1706.24
fig|1428.368.peg.4758	2	99	LSTDNYYGHSVAGTAVAAHEVGHAIQDAK			0.0116693	2981.44	746.367	2981.43	746.364	4	19	5.1.1.1852.23
fig|1428.368.peg.4758	2	99	YSQVYSTSGMTGAEVAR			0.0149066	1805.84	903.927	1805.83	903.92	2	15	3.1.1.1740.24
fig|1428.368.peg.4136; fig|11428.3.peg.3724	2	99	LPEINPELANEVK			-0.000734156	1464.78	733.398	1464.78	733.398	2	20	4.1.1.1874.9
fig|1428.368.peg.4136; fig|11428.3.peg.3724	2	99	YRKEDVEKPVRQ		missed R-K@2; missed K-E@3; missed R-Q@11	-2.84768e-05	1545.83	516.283	1545.83	516.283	3	14	2.1.1.1372.2
fig|1428.368.peg.2676; fig|11428.3.peg.3351	2	99	LTNETFPAEPEK			-0.000780668	1374.67	688.34	1374.67	688.341	2	15	1.1.1.1507.20
fig|1428.368.peg.2676; fig|11428.3.peg.3351	2	99	MHVDEKLTNETFPAEPEK		missed K-L@6	0.0106308	2114.01	529.51	2114	529.507	4	16	6.1.1.1546.5
fig|11428.3.peg.6114	2	99	NPQTGEEMQIAASK			-0.00223407	1502.7	752.358	1502.7	752.359	2	15	6.1.1.1452.18
fig|11428.3.peg.6114	2	99	TGRNPQTGEEMQIAASK		missed R-N@3	0.0112683	1816.89	606.636	1816.87	606.632	3	15	1.1.1.1419.23
fig|11428.3.peg.5209	2	99	DSVGVNVTHIR			0.000611744	1195.63	598.823	1195.63	598.823	2	15	1.1.1.1484.14
fig|11428.3.peg.5209	2	99	TCLEICGNHVLHR	Carbamidomethyl(C)@2; Carbamidomethyl(C)@6		0.00402587	1607.77	402.95	1607.77	402.949	4	13	4.1.1.1628.6
fig|11428.3.peg.3302	2	99	AGHMNSTEVASIAK			-0.00396194	1414.68	708.349	1414.69	708.351	2	12	3.1.1.1589.24
fig|11428.3.peg.3302	2	99	TVHPVTCFAMR	Carbamidomethyl(C)@7		0.00303867	1317.64	440.219	1317.63	440.218	3	15	3.1.1.1702.6
fig|11428.3.peg.1649	2	99	FASASHAGNSIFPVGTIK			-0.00402361	1802.93	601.983	1802.93	601.984	3	18	5.1.1.1870.7
fig|11428.3.peg.1649	2	99	IVVPPHSEAALTSSSLSDVQASTSGGASK			0.0121427	2782.41	928.477	2782.4	928.473	3	22	4.1.1.1800.20
fig|1428.368.peg.6078; fig|11428.3.peg.120	2	99	LTGAHQPSSQIEIQVK			-0.000440472	1734.93	868.47	1734.93	868.471	2	16	1.1.1.1509.25
fig|1428.368.peg.6078; fig|11428.3.peg.120	2	99	VIDALEAEGYR			0.00223866	1234.62	618.318	1234.62	618.317	2	16	3.1.1.1790.8
fig|1428.368.peg.5192; fig|11428.3.peg.1817	2	99	MNDFEQNVQSK			-0.000728206	1338.59	670.301	1338.59	670.301	2	12	2.1.1.1572.23
fig|1428.368.peg.5192; fig|11428.3.peg.1817	2	99	NDFEQNVQSK		cleaved M-N@N-term	-0.000722076	1207.55	604.78	1207.55	604.781	2	10	5.1.1.1569.22
fig|1428.368.peg.3867; fig|11428.3.peg.3245	2	99	ATSVPNSVAGALAGVIR			0.00436755	1581.89	791.951	1581.88	791.949	2	22	1.1.1.2215.2
fig|1428.368.peg.3867; fig|11428.3.peg.3245	2	99	ERGTAEIQAIGAGALNQAVK		missed R-G@2	-0.00323762	1996.07	666.363	1996.07	666.364	3	23	2.1.1.1845.17
fig|11428.3.peg.839	2	99	DRIDSDYSDYKEEYAAEVAPQR		missed R-I@2; missed K-E@11	0.0103952	2619.18	655.803	2619.17	655.8	4	16	4.1.1.1766.15
fig|11428.3.peg.839	2	99	IDYNYDDKDDKDVVK		missed K-D@8; missed K-D@11	-0.00217323	1843.85	922.93	1843.85	922.931	2	14	6.1.1.1437.24
fig|11428.3.peg.644	2	99	FAVDVLGEELDEVDGVLNELADAK			0.000552191	2559.26	854.094	2559.26	854.094	3	29	1.1.1.4055.2
fig|11428.3.peg.644	2	99	HVLFNNSASRPTVASK			0.00293096	1726.91	576.645	1726.91	576.644	3	20	6.1.1.1411.18
fig|11428.3.peg.56	2	99	AGADIIIANLPDFTVR			-0.00196133	1684.91	843.464	1684.91	843.465	2	21	6.1.1.2223.3
fig|11428.3.peg.56	2	99	VAELIFSSLPVQK			-0.00493239	1429.81	715.914	1429.82	715.916	2	21	6.1.1.2031.2
fig|11428.3.peg.5280	2	99	TVLLTGFDPFGGENINPAWEVAK			0.0014067	2474.25	825.757	2474.25	825.757	3	28	6.1.1.2325.3
fig|11428.3.peg.5280	2	99	VAINIDDAR			-0.00333459	985.516	493.765	985.519	493.767	2	14	6.1.1.1509.5
fig|11428.3.peg.1006	2	99	MHHCHPCFGGHKPTGPICTTAPVIHPTK	Carbamidomethyl(C)@4; Carbamidomethyl(C)@7; Carbamidomethyl(C)@18		0.00884512	3174.5	794.632	3174.49	794.629	4	15	6.1.1.1436.25
fig|11428.3.peg.1006	2	99	QCVTHSFSTTVVPHIFPTHTTHVHHQQIK	Carbamidomethyl(C)@2		0.00739411	3403.71	681.749	3403.7	681.747	5	17	6.1.1.1528.13
fig|11428.3.peg.3527	2	99	AGHTEAAVDLAK			0.00116286	1181.61	394.876	1181.6	394.875	3	10	4.1.1.1469.3
fig|11428.3.peg.3527	2	99	RAGHTEAAVDLAK		missed R-A@1	-0.00342949	1337.7	446.908	1337.71	446.909	3	14	2.1.1.1420.8
fig|11428.3.peg.731	2	99	YLHMTNEADKK		missed K-K@10	-0.000105625	1348.64	450.555	1348.64	450.555	3	12	2.1.1.1420.9
fig|11428.3.peg.731	2	99	YLNGSLVNNQK	Deamidated(N)@3		0.000719612	1249.63	625.823	1249.63	625.822	2	13	2.1.1.1618.14
fig|11428.3.peg.731	0.00656377	20.44	IPDQADTFLK			-0.00176432	1146.59	574.302	1146.59	574.303	2	9	2.1.1.1768.6
fig|11428.3.peg.731	0.00524306	16.19	AKELFSKHEGYDIK		missed K-E@2; missed K-H@7	-0.00507064	1663.85	555.625	1663.86	555.626	3	8	1.1.1.1436.13
fig|1428.368.peg.6308; fig|11428.3.peg.1980	2	99	DVEYIEDNKQGILR		missed K-Q@9	0.000525786	1690.85	564.625	1690.85	564.625	3	14	2.1.1.1746.14
fig|1428.368.peg.6308; fig|11428.3.peg.1980	2	99	HEKLEVPASK		missed K-L@3	-0.00330135	1136.62	379.879	1136.62	379.88	3	14	5.1.1.1484.2
fig|1428.368.peg.6308; fig|11428.3.peg.1980	0.0101054	28.14	EIAELLKR		missed K-R@7	-0.000852511	970.58	486.297	970.581	486.298	2	8	1.1.1.1528.11
fig|11428.3.peg.307	2	99	NIAQGAALATGAK			0.000622245	1184.65	593.333	1184.65	593.333	2	13	2.1.1.1596.16
fig|11428.3.peg.307	2	99	YIETSHDIHANPEIGNQEFYASR			0.017719	2690.25	673.571	2690.24	673.566	4	19	2.1.1.1730.18
fig|11428.3.peg.307	0.0070049	21.13	LITEEGLLEK			-0.00454984	1143.63	572.824	1143.64	572.827	2	10	3.1.1.1822.9
fig|11428.3.peg.5749	2	99	HIAHTHPQNIVNVTCK	Carbamidomethyl(C)@15		0.00347145	1867.95	467.995	1867.95	467.994	4	11	5.1.1.1545.12
fig|11428.3.peg.5749	2	99	SQLIVTHNLYQAQK			0.00882645	1641.89	821.954	1641.88	821.949	2	19	6.1.1.1524.18
fig|11428.3.peg.5749	0.0177288	40.39	LVVITEK			-0.011715	800.489	401.252	800.501	401.258	2	6	4.1.1.1584.3
fig|11428.3.peg.5690	2	99	HGVGFDAVAEQIYR			-0.0040665	1560.76	521.262	1560.77	521.263	3	18	4.1.1.1865.3
fig|11428.3.peg.5690	2	99	YKHEGVIYEKDDDDKR		missed K-H@2; missed K-D@10; missed K-R@15	0.000117341	2008.95	670.657	2008.95	670.657	3	17	1.1.1.1301.6
fig|11428.3.peg.5690	0.0163737	38.37	KYKHEGVIYEKDDDDKR		missed K-Y@1; missed K-H@3; missed K-D@11; missed K-R@16	0.000690435	2137.04	535.268	2137.04	535.268	4	7	6.1.1.1268.13
fig|1428.368.peg.3890; fig|11428.3.peg.3221	2	99	ANVLPVSGDKK		missed K-K@10	-0.00123796	1126.63	564.324	1126.63	564.325	2	12	2.1.1.1475.11
fig|1428.368.peg.3890; fig|11428.3.peg.3221	2	99	GAAWNSVQIAER			-0.00284571	1300.65	651.332	1300.65	651.333	2	20	6.1.1.1598.15
fig|1428.368.peg.3890; fig|11428.3.peg.3221	0.0195421	42.37	EGVTVAELK			-0.00158317	944.516	473.265	944.518	473.266	2	10	2.1.1.1639.7
fig|11428.3.peg.5839	2	99	VFDKWLHTTVAK		missed K-W@4	0.00417329	1443.79	482.271	1443.79	482.27	3	15	6.1.1.1575.7
fig|11428.3.peg.5839	1.85387	99	VFHASLLPGR			0.00108124	1095.62	366.214	1095.62	366.214	3	11	5.1.1.1753.2
fig|11428.3.peg.5839	0.158641	87.59	NVTEFANR			-0.00445138	949.457	475.736	949.462	475.738	2	8	4.1.1.1533.9
fig|11428.3.peg.5839	0.0190881	42.02	TFSIYALR			-0.000898684	969.527	485.771	969.528	485.771	2	10	4.1.1.1917.2
fig|11428.3.peg.4969	2	99	SPALQNTTAVSK			-0.00400688	1215.64	608.828	1215.65	608.83	2	14	4.1.1.1483.18
fig|11428.3.peg.4969	2	99	SPALQNTTAVSKK		missed K-K@12	-0.00283105	1343.74	448.92	1343.74	448.921	3	12	5.1.1.1489.6
fig|11428.3.peg.4969	0.0218195	45.16	FADHYEEIKK		missed K-K@9	0.00631872	1278.63	427.217	1278.62	427.215	3	6	3.1.1.1545.9
fig|1428.368.peg.6171; fig|11428.3.peg.5933	2	99	AGVVSAGDFKR		missed K-R@10	0.00150934	1105.59	369.537	1105.59	369.537	3	10	4.1.1.1551.2
fig|1428.368.peg.6171; fig|11428.3.peg.5933	2	99	SHAYTSHLFANK			-0.0034179	1374.66	688.34	1374.67	688.341	2	13	2.1.1.1525.11
fig|1428.368.peg.6171; fig|11428.3.peg.5933	0.0287242	52.67	KAGVVSAGDFKR		missed K-A@1; missed K-R@11	-0.00642241	1233.68	412.233	1233.68	412.235	3	7	2.1.1.1475.5
fig|11428.3.peg.2648	2	99	TASGIVLPDTAK			0.00176655	1171.65	586.831	1171.64	586.83	2	13	4.1.1.1682.16
fig|11428.3.peg.2648	2	99	YAGTEVKYEGTDY		cleaved Y-L@C-term; missed K-Y@7	0.00244237	1494.65	748.334	1494.65	748.333	2	20	5.1.1.1730.23
fig|11428.3.peg.2648	0.0428718	62.32	VVAVGTGR			-0.00145439	757.443	379.729	757.445	379.73	2	6	5.1.1.1470.4
fig|11428.3.peg.6102	2	99	HHNETLSTGVLR			-0.00117292	1362.7	455.24	1362.7	455.241	3	14	2.1.1.1505.7
fig|11428.3.peg.6102	2	99	SAALPPALFAYEVR			0.00186614	1503.81	752.913	1503.81	752.912	2	18	6.1.1.2068.8
fig|11428.3.peg.6102	0.0362122	58.09	SYGYGHPPGR		cleaved M-S@N-term	0.00282102	1089.5	364.175	1089.5	364.174	3	6	4.1.1.1456.3
fig|11428.3.peg.6012	2	99	AFTVGNALPAEK			0.000534821	1216.65	609.33	1216.65	609.33	2	17	3.1.1.1785.18
fig|11428.3.peg.6012	1.92082	99	SSDNTAGNILFNK			-0.000430588	1379.67	690.841	1379.67	690.841	2	12	2.1.1.1745.16
fig|11428.3.peg.6012	0.120904	83.5	LGEIAEAAVR			-0.000789639	1027.57	514.79	1027.57	514.79	2	11	6.1.1.1514.11
fig|11428.3.peg.6012	0.00524306	16.44	FAFASTYK			-0.0008946	933.459	467.737	933.46	467.737	2	9	3.1.1.1765.3
fig|11428.3.peg.1346	2	99	HTPSAFNSQSAR			-0.00207815	1301.61	434.877	1301.61	434.878	3	12	2.1.1.1412.6
fig|11428.3.peg.1346	2	99	LIAQMPFGKPVVHAGEK			0.00188494	1821	608.007	1821	608.006	3	16	2.1.1.1737.10
fig|11428.3.peg.1346	0.0433514	62.33	IVPENNFASTEEK			-0.00226695	1476.71	739.361	1476.71	739.362	2	9	2.1.1.1624.23
fig|1428.368.peg.6162; fig|11428.3.peg.5923	2	99	ACGQSIIPTTTGAAK	Carbamidomethyl(C)@2		-0.00239199	1474.74	738.379	1474.74	738.38	2	14	1.1.1.1513.19
fig|1428.368.peg.6162; fig|11428.3.peg.5923	2	99	HTVISNASCTTNCLAPVVK	Carbamidomethyl(C)@9; Carbamidomethyl(C)@13		0.00531304	2071.02	691.349	2071.02	691.347	3	22	1.1.1.1554.12
fig|1428.368.peg.6162; fig|11428.3.peg.5923	0.0560111	68.41	AILHVEAGAK			-0.00217863	1007.57	504.794	1007.58	504.795	2	8	2.1.1.1506.16
fig|1428.368.peg.3797; fig|11428.3.peg.2147	2	99	GFDNFTVLLETEGK			0.00256454	1568.77	785.395	1568.77	785.393	2	19	1.1.1.2305.4
fig|1428.368.peg.3797; fig|11428.3.peg.2147	2	99	HAISTFVPQK			-0.0032018	1126.61	564.312	1126.61	564.314	2	17	3.1.1.1616.13
fig|1428.368.peg.3797; fig|11428.3.peg.2147	0.0655015	71.71	NVSIELE			0.00112939	802.408	402.212	802.407	402.211	2	7	4.1.1.1797.3
fig|1428.368.peg.5901; fig|11428.3.peg.4300	2	99	EAILAEMLLSK			-0.0149767	1216.66	609.337	1216.67	609.344	2	15	6.1.1.2174.3
fig|1428.368.peg.5901; fig|11428.3.peg.4300	2	99	IYGDYAPNISER			0.00687792	1396.67	699.342	1396.66	699.338	2	15	3.1.1.1768.15
fig|1428.368.peg.5901; fig|11428.3.peg.4300	0.0846002	98.37	IVEVEGLK			-0.0274806	885.49	443.752	885.517	443.766	2	10	2.1.1.1646.7
fig|11428.3.peg.346	2	99	GQQGTFTAIEQGIFDKGNLDSPGTIIK		missed K-G@16	0.00449444	2834.45	945.824	2834.45	945.822	3	18	6.1.1.2136.5
fig|11428.3.peg.346	2	99	GSYNYQFTGQTSK			-0.0015955	1479.66	740.838	1479.66	740.839	2	18	2.1.1.1632.14
fig|11428.3.peg.346	0.0594835	69.47	GNLDSPGTIIK			-0.00133105	1113.6	557.808	1113.6	557.809	2	11	6.1.1.1527.13
fig|11428.3.peg.346	0.0241089	46.98	MEVTFTVSK			-0.00600124	1040.52	521.265	1040.52	521.268	2	10	4.1.1.1753.7
fig|11428.3.peg.1937	2	99	GDGPDSDIVLSSR			0.0068241	1316.63	659.321	1316.62	659.318	2	14	5.1.1.1723.20
fig|11428.3.peg.1937	2	99	LIQSAEAATCLSDVR	Carbamidomethyl(C)@10		-0.00785796	1632.81	817.41	1632.81	817.414	2	15	4.1.1.1768.19
fig|11428.3.peg.1937	0.0644927	71.14	SYGILANSR			-0.00878914	979.5	490.757	979.509	490.762	2	8	5.1.1.1690.8
fig|11428.3.peg.1937	0.0395292	59.58	MNELTPLQR			-0.00473703	1100.56	551.287	1100.56	551.29	2	8	2.1.1.1678.12
fig|11428.3.peg.5505	2	99	IYHGDTFSGVILK			0.00353594	1448.77	483.931	1448.77	483.929	3	16	4.1.1.1787.7
fig|11428.3.peg.5505	2	99	RPGDQNKDDFAER		missed K-D@7	-9.2434e-05	1546.71	516.578	1546.71	516.578	3	15	4.1.1.1402.6
fig|11428.3.peg.5505	0.076756	74.68	LGDKVNQEISMVR		missed K-V@4	-0.0111951	1487.77	744.89	1487.78	744.896	2	15	6.1.1.1534.22
fig|11428.3.peg.5505	0.0301184	52.21	AIAPTVFSETLR			-0.000973417	1303.71	652.864	1303.71	652.864	2	11	4.1.1.1909.11
fig|1428.368.peg.2141	2	99	GYAAEGIHGDLTQAK			-0.000130499	1529.75	765.881	1529.75	765.881	2	17	1.1.1.1481.25
fig|1428.368.peg.2141	2	99	HPHIIVGTPGR			-0.000495078	1182.66	395.228	1182.66	395.228	3	11	1.1.1.1388.2
fig|1428.368.peg.2141	0.103474	80.55	DIIGQAQTGTGK			0.00409584	1187.62	594.817	1187.61	594.815	2	8	2.1.1.1563.14
fig|1428.368.peg.2141	0.00612309	17.59	EAVQGIVIAPTR			0.00298505	1252.72	627.366	1252.71	627.364	2	9	2.1.1.1738.17
fig|11428.3.peg.1501	2	99	HQIKDTVLAFQQAAVR		missed K-D@4	0.00565182	1824.01	609.009	1824	609.008	3	16	2.1.1.1795.8
fig|11428.3.peg.1501	2	99	ISANDYHPDGLTVQDYVQYTK			0.00313561	2426.14	809.721	2426.14	809.72	3	21	4.1.1.1898.10
fig|11428.3.peg.1501	0.128427	83.96	AAIQLAHAGR			-0.000992721	1006.57	504.29	1006.57	504.291	2	7	2.1.1.1485.17
fig|11428.3.peg.871	2	99	IDEAYDVSQIEK			-0.00426712	1408.67	705.341	1408.67	705.343	2	20	1.1.1.1599.9
fig|11428.3.peg.871	1.14874	99	EAIFHALVR			-0.00647533	1054.59	528.3	1054.59	528.303	2	11	3.1.1.1782.8
fig|11428.3.peg.871	0.966576	99	SDDIPADVR			0.0020098	986.469	494.242	986.467	494.241	2	9	2.1.1.1554.8
fig|11428.3.peg.871	0.0227338	72.68	NFGCTHFIVGR	Carbamidomethyl(C)@4		0.0469	1306.67	436.564	1306.62	436.549	3	9	2.1.1.1717.6
fig|1428.368.peg.6288; fig|11428.3.peg.2000	2	99	DFENYIPFAALR			-0.00093227	1454.72	728.366	1454.72	728.367	2	15	6.1.1.2245.6
fig|1428.368.peg.6288; fig|11428.3.peg.2000	2	99	VIINGRDFENYIPFAALR	Deamidated(N)@4	missed R-D@6	0.00162375	2108.11	703.71	2108.11	703.709	3	19	6.1.1.2260.2
fig|1428.368.peg.6288; fig|11428.3.peg.2000	0.138466	85.09	AQVQYYGTGR		cleaved M-A@N-term	-0.000115316	1141.55	571.783	1141.55	571.783	2	7	2.1.1.1516.16
fig|1428.368.peg.5351; fig|11428.3.peg.1578	1.63827	99	DVNATTGAVTDKK		missed K-K@12	-0.00689257	1318.67	660.34	1318.67	660.344	2	10	2.1.1.1422.12
fig|1428.368.peg.5351; fig|11428.3.peg.1578	0.987163	99	AVVQDGGFKDDSILPYTTQER		cleaved N-A@N-term; missed K-D@9	8.0773e-05	2338.14	780.389	2338.14	780.389	3	16	2.1.1.1845.18
fig|1428.368.peg.5351; fig|11428.3.peg.1578	0.910095	99	GQYIAAIAGGYK			0.0196722	1210.65	606.334	1210.63	606.325	2	13	2.1.1.1763.12
fig|1428.368.peg.5351; fig|11428.3.peg.1578	0.555955	97.5	AALVYDLK			-0.0012945	891.505	446.76	891.507	446.761	2	11	2.1.1.1728.5
fig|1428.368.peg.5351; fig|11428.3.peg.1578	0.0680339	71.77	ISFTPPTPPATK			-0.00135677	1255.68	628.847	1255.68	628.848	2	9	2.1.1.1768.12
fig|11428.3.peg.893	2	99	TGDQNVNYTVR			-0.00306562	1265.6	633.806	1265.6	633.807	2	12	5.1.1.1579.20
fig|11428.3.peg.893	1.88606	99	YTISQSLYNK			-0.00200642	1215.61	608.813	1215.61	608.814	2	14	3.1.1.1743.12
fig|11428.3.peg.893	0.150581	91.4	QYELHATVPIK	Gln->pyro-Glu@N-term		-0.00428109	1280.67	641.343	1280.68	641.346	2	12	3.1.1.1841.10
fig|11428.3.peg.893	0.118615	82.52	SLETYYENYDLK			0.00099284	1536.7	769.357	1536.7	769.357	2	12	4.1.1.1876.15
fig|1428.368.peg.4962	2	99	TFVVMGVANQR			0.00115438	1220.63	611.325	1220.63	611.324	2	16	5.1.1.1834.9
fig|1428.368.peg.4962	2	99	YLANDLGQHGIR			-0.00246476	1355.69	678.853	1355.69	678.855	2	15	5.1.1.1691.17
fig|1428.368.peg.4962	0.166216	87.46	ASLEASVK			-0.00153459	803.438	402.726	803.439	402.727	2	7	6.1.1.1355.5
fig|1428.368.peg.4962	0.0109954	27.66	SIAWGIAR			-0.00236453	872.484	437.25	872.487	437.251	2	7	5.1.1.1832.5
fig|1428.368.peg.4962	0.00612309	17.18	LIFTYAGER			0.0017503	1068.56	535.288	1068.56	535.287	2	7	4.1.1.1802.8
fig|1428.368.peg.5256	2	99	EIELYESNAELLK			0.000678047	1549.79	775.901	1549.79	775.901	2	18	4.1.1.1936.5
fig|1428.368.peg.5256	2	99	VENETIIQLVR			0.000203515	1312.74	657.375	1312.74	657.375	2	17	4.1.1.1913.8
fig|1428.368.peg.5256	0.131944	84.16	KGLEIYYK		missed K-G@1	-0.0018854	1012.56	507.286	1012.56	507.287	2	9	6.1.1.1493.6
fig|1428.368.peg.5256	0.0305841	52.21	GLEIYYK			-0.00091834	884.464	443.239	884.464	443.239	2	7	5.1.1.1786.8
fig|1428.368.peg.5256	0.0154727	35.39	VLAHPVR			-0.00263753	790.479	396.247	790.481	396.248	2	6	1.1.1.1264.4
fig|11428.3.peg.2504	2	99	MAHHAQNTYEAELSLHENFAK			0.0106301	2440.13	814.385	2440.12	814.382	3	24	6.1.1.1544.19
fig|11428.3.peg.2504	2	99	TLVEEQITR			-0.00249138	1087.58	544.8	1087.59	544.801	2	14	6.1.1.1482.13
fig|11428.3.peg.2504	0.185087	88.8	ALELETTAR			2.53529e-05	1002.53	502.275	1002.53	502.275	2	9	4.1.1.1609.10
fig|11428.3.peg.4973	2	99	KGVSNSAPPVMVSNVAYGR		missed K-G@1	-0.0115602	1931.98	645	1931.99	645.004	3	20	6.1.1.1556.12
fig|11428.3.peg.4973	2	99	SQIASALNVNAK			0.00222223	1214.66	608.339	1214.66	608.338	2	14	4.1.1.1654.14
fig|11428.3.peg.4973	0.187755	88.92	YSTTHTLPAR			0.00357789	1145.59	382.869	1145.58	382.868	3	8	6.1.1.1341.6
fig|11428.3.peg.4973	0.0218195	43.14	MQYTESMVYSK			0.00417313	1365.6	683.807	1365.59	683.805	2	8	4.1.1.1687.23
fig|11428.3.peg.3614	2	99	NIADDPTGSNTTAGQR			-0.00115932	1616.74	809.376	1616.74	809.377	2	16	2.1.1.1483.21
fig|11428.3.peg.3614	1.14874	99	ITMNHTDINR			-0.00175148	1213.59	607.8	1213.59	607.801	2	7	6.1.1.1367.12
fig|11428.3.peg.3614	1.02228	99	LYYNPGIPEVKK		missed K-K@11	-0.00239227	1419.77	474.265	1419.78	474.266	3	12	3.1.1.1760.4
fig|11428.3.peg.3614	0.0409586	59.17	NYDDLYADTR			-0.00309124	1244.53	623.271	1244.53	623.273	2	9	2.1.1.1692.17
fig|11428.3.peg.3614	0.00524306	15	VAGEEFPDQK			0.00350605	1118.53	560.271	1118.52	560.269	2	8	2.1.1.1538.15
fig|11428.3.peg.4166	2	99	TAGTCIDHMIIQEPAGLK	Carbamidomethyl(C)@5		-0.000656174	1953.96	652.329	1953.97	652.329	3	17	4.1.1.1845.8
fig|11428.3.peg.4166	1.0655	99	ESFYEAQHYGHEADFR			0.00195815	1984.84	662.619	1984.83	662.619	3	14	6.1.1.1533.22
fig|11428.3.peg.4166	0.74958	98.55	FQGDVLVTGER			0.00808782	1219.63	610.821	1219.62	610.817	2	13	1.1.1.1578.10
fig|11428.3.peg.4166	0.405607	95.78	QAIVYPITSQK			-0.00269706	1246.69	624.352	1246.69	624.353	2	10	4.1.1.1682.20
fig|11428.3.peg.4932	2	99	GHAKEEVNQTSTHDKPESK		missed K-E@4	0.00312985	2121.01	531.26	2121.01	531.259	4	17	2.1.1.1051.2
fig|11428.3.peg.4932	2	99	GSYDASDKEIESAIEDIILAKPL		missed K-E@8	0.00417434	2476.26	826.428	2476.26	826.427	3	26	6.1.1.2724.2
fig|11428.3.peg.4932	0.21467	90.42	MPSMNFAEK			0.000193158	1053.46	527.739	1053.46	527.738	2	9	5.1.1.1785.12
fig|11428.3.peg.2076	2	99	SVVNAPNALHIETVVNGEVR	Deamidated(N)@16		-0.00299861	2118.1	707.042	2118.11	707.043	3	18	4.1.1.1861.14
fig|11428.3.peg.2076	2	99	VTIPITMLECIER	Carbamidomethyl(C)@10		-0.003532	1573.82	787.916	1573.82	787.918	2	16	6.1.1.2184.4
fig|11428.3.peg.2076	0.218963	90.66	VCEIVNWAK	Carbamidomethyl(C)@2		-0.00386276	1117.56	559.785	1117.56	559.787	2	10	5.1.1.1839.5
fig|11428.3.peg.6124	2	99	NEVSDNCFTDR	Carbamidomethyl(C)@7		0.000915506	1355.54	678.778	1355.54	678.778	2	14	5.1.1.1647.12
fig|11428.3.peg.6124	1.88606	99	RLESAQADGFSIKK		missed R-L@1; missed K-K@13	0.00750111	1548.83	388.216	1548.83	388.214	4	11	5.1.1.1622.2
fig|11428.3.peg.6124	0.267606	92.54	SLVVEGENFNYR			0.00773262	1425.7	713.856	1425.69	713.852	2	10	4.1.1.1803.18
fig|11428.3.peg.6124	0.0830199	75.47	VIMDPHPSNER			0.00767104	1293.62	432.214	1293.61	432.212	3	9	6.1.1.1352.2
fig|1428.368.peg.4398	2	99	SRFWEEQGQLGGR		missed R-F@2	-0.000255085	1548.74	775.379	1548.74	775.379	2	15	6.1.1.1545.16
fig|1428.368.peg.4398	1.95861	99	YPVEMNEVGK			-0.00598459	1164.54	583.279	1164.55	583.282	2	14	3.1.1.1698.8
fig|1428.368.peg.4398	0.206908	97.41	LHQHDNGVTAFYR	Deamidated(N)@6		0.0186725	1557.75	520.258	1557.73	520.251	3	12	5.1.1.1650.17
fig|1428.368.peg.4398	0.0788339	74.31	IITDLPIR			-0.00401472	939.571	470.793	939.575	470.795	2	10	2.1.1.1798.5
fig|11428.3.peg.135	2	99	HESPQVLYIK			-0.00226056	1212.65	607.331	1212.65	607.332	2	13	5.1.1.1686.20
fig|11428.3.peg.135	2	99	HSTTCPISHGAYTEFQAYCSEER	Carbamidomethyl(C)@5; Carbamidomethyl(C)@19		0.0133846	2730.16	683.547	2730.14	683.543	4	14	4.1.1.1741.20
fig|11428.3.peg.135	0.271646	92.61	VAEQYSIR			-0.00206689	964.496	483.255	964.498	483.256	2	8	4.1.1.1541.3
fig|1428.368.peg.1738; fig|11428.3.peg.2458	2	99	TLEEGQEVTFEVEQGNR			0.00301024	1963.92	982.965	1963.91	982.963	2	22	5.1.1.1859.20
fig|1428.368.peg.1738; fig|11428.3.peg.2458	2	99	TLEEGQEVTFEVEQGNRGPQATNVNKK		missed R-G@17; missed K-K@26	0.00673316	3001.48	751.378	3001.47	751.376	4	17	1.1.1.1571.22
fig|1428.368.peg.1738; fig|11428.3.peg.2458	0.2652	92.4	GPQATNVNKK		missed K-K@9	-0.00130948	1055.57	528.793	1055.57	528.793	2	9	6.1.1.1060.2
fig|11428.3.peg.4208	2	99	TGTLTEGKPTVTDVYVR			0.00547434	1835.97	612.997	1835.96	612.995	3	18	6.1.1.1542.18
fig|11428.3.peg.4208	1.34679	99	ITKPSDQTLFQK			-0.0113028	1404.75	469.257	1404.76	469.261	3	14	6.1.1.1477.4
fig|11428.3.peg.4208	0.527244	97.14	GILENTAYK			-0.0009207	1007.53	504.771	1007.53	504.772	2	9	4.1.1.1633.10
fig|11428.3.peg.4208	0.417937	95.88	YAQHAYDITLK			0.0116288	1321.68	661.846	1321.67	661.841	2	9	4.1.1.1654.18
fig|11428.3.peg.3743	2	99	HVTDYFVAK			0.00309618	1078.55	540.281	1078.54	540.28	2	14	3.1.1.1662.11
fig|11428.3.peg.3743	2	99	LTANLETAYGK			-0.00163059	1179.61	590.813	1179.61	590.814	2	16	6.1.1.1519.15
fig|11428.3.peg.3743	0.293282	93.26	EYKGESTEELITNKR		missed K-G@3; missed K-R@14	0.00841823	1795.9	599.642	1795.9	599.639	3	10	2.1.1.1569.20
fig|11428.3.peg.3743	0.0254883	46.45	FVQALSTSAK			-0.0116153	1050.56	526.287	1050.57	526.293	2	10	4.1.1.1572.4
fig|11428.3.peg.3743	0.00788851	20.58	GATIMIQPSNPVYGAK			0.00134674	1645.85	823.933	1645.85	823.932	2	8	2.1.1.1803.22
fig|11428.3.peg.3001	2	99	LGLSDETIFSK			-0.00118782	1208.63	605.321	1208.63	605.322	2	17	4.1.1.1901.6
fig|11428.3.peg.3001	2	99	LGLSDETIFSKDHTK		missed K-D@11	0.00222538	1689.86	564.294	1689.86	564.293	3	17	3.1.1.1767.7
fig|11428.3.peg.3001	0.257275	92.02	INSTEILKDGR		missed K-D@8	0.00464576	1244.68	415.9	1244.67	415.898	3	11	2.1.1.1588.4
fig|11428.3.peg.3001	0.0963675	77.95	INSTEILK			0.00242553	916.525	459.27	916.523	459.269	2	8	4.1.1.1602.10
fig|11428.3.peg.4177	2	99	FQSIICNILK	Carbamidomethyl(C)@6		-0.000760554	1234.67	618.344	1234.67	618.344	2	15	4.1.1.2118.2
fig|11428.3.peg.4177	2	99	LLFSQNFAR			-0.00228624	1094.58	548.3	1094.59	548.301	2	15	5.1.1.1930.4
fig|11428.3.peg.4177	0.363512	94.89	QLDYFLDNK			0.00123108	1154.56	578.288	1154.56	578.288	2	12	5.1.1.1897.4
fig|1428.368.peg.6343	2	99	AANELGEDVPTIADR			-0.00209992	1569.76	785.888	1569.76	785.889	2	16	2.1.1.1782.24
fig|1428.368.peg.6343	1.56864	99	TIHIYNTLTR		cleaved M-T@N-term	0.00521835	1230.68	411.233	1230.67	411.231	3	12	6.1.1.1526.3
fig|1428.368.peg.6343	0.419075	95.81	VVIEAYVK			-0.00365728	919.534	460.774	919.538	460.776	2	11	6.1.1.1555.5
fig|1428.368.peg.6343	0.393619	95.41	NIILEDTAQGTR		cleaved L-N@N-term	0.00328601	1329.69	665.853	1329.69	665.852	2	11	2.1.1.1687.17
fig|1428.368.peg.3939; fig|11428.3.peg.3171	2	99	IATVGDAVTYIESHL			-0.0014036	1587.81	794.914	1587.81	794.914	2	24	1.1.1.3097.2
fig|1428.368.peg.3939; fig|11428.3.peg.3171	2	99	LGVEETEVVPAASFK			0.00348312	1574.82	788.419	1574.82	788.417	2	19	2.1.1.1849.8
fig|1428.368.peg.3939; fig|11428.3.peg.3171	0.379864	95.18	ADVLER		cleaved M-A@N-term	-0.0006605	701.37	351.692	701.371	351.693	2	6	6.1.1.1328.2
fig|11428.3.peg.6024	1.92082	99	QAYEGVIHTK	Gln->pyro-Glu@N-term		-1.88054e-05	1127.56	564.788	1127.56	564.788	2	11	2.1.1.1655.16
fig|11428.3.peg.6024	1.74473	99	IASNGPIAVR	Deamidated(N)@4		0.0020924	997.558	499.786	997.556	499.785	2	12	2.1.1.1588.11
fig|11428.3.peg.6024	0.38934	95.3	AFCAGADLKER	Carbamidomethyl(C)@3	missed K-E@9	0.00426761	1236.6	413.206	1236.59	413.205	3	9	5.1.1.1613.7
fig|11428.3.peg.6024	0.258848	91.92	AFCAGADLK	Carbamidomethyl(C)@3		-0.00063666	951.448	476.731	951.448	476.731	2	8	2.1.1.1590.8
fig|11428.3.peg.6024	0.0851282	75.22	VVILTGAGEK			0.00170073	985.582	493.798	985.581	493.798	2	10	2.1.1.1606.12
fig|11428.3.peg.1941	2	99	NNSENEEVEVEAEK			-0.00196264	1618.69	810.354	1618.7	810.355	2	12	4.1.1.1539.26
fig|11428.3.peg.1941	1.74473	99	KKNNSENEEVEVEAEK		missed K-K@1; missed K-N@2	0.00516444	1874.89	625.971	1874.89	625.969	3	10	6.1.1.1313.12
fig|11428.3.peg.1941	0.546682	97.25	KNNSENEEVEVEAEK		missed K-N@1	0.018558	1746.81	583.277	1746.79	583.271	3	9	6.1.1.1355.18
fig|11428.3.peg.1941	0.106793	79.62	ITGGTVVTNDFNLNK			-0.00642955	1591.81	796.914	1591.82	796.918	2	10	4.1.1.1802.25
fig|11428.3.peg.5791	2	99	IGNAHQLKEIIDSK		missed K-E@8	-0.00426811	1564.85	783.434	1564.86	783.436	2	20	6.1.1.1522.20
fig|11428.3.peg.5791	1.55284	99	RIGNAHQLKEIIDSK		missed R-I@1; missed K-E@9	-0.00485171	1720.95	431.246	1720.96	431.247	4	14	6.1.1.1484.5
fig|11428.3.peg.5791	0.769551	98.55	ASHYFYSCSQAGK	Carbamidomethyl(C)@8		0.00210027	1504.64	502.555	1504.64	502.554	3	12	2.1.1.1532.9
fig|11428.3.peg.5791	0.120904	81.62	GIHASTIGK			-0.000943468	882.491	442.253	882.492	442.253	2	6	6.1.1.1269.6
fig|11428.3.peg.3476	2	99	HLVGSLSMAHAGR			-0.000305379	1334.69	445.903	1334.69	445.903	3	21	1.1.1.1444.5
fig|11428.3.peg.3476	2	99	LAEQGFYDGVTFHR			0.00433706	1638.78	547.268	1638.78	547.267	3	19	2.1.1.1797.7
fig|11428.3.peg.3476	0.414539	95.69	VIPGFVSQGGDPTGTGAGGPGYSIPCETDGNPHR	Carbamidomethyl(C)@26		0.00755591	3353.54	1118.86	3353.54	1118.85	3	12	4.1.1.1875.18
fig|11428.3.peg.3476	0.0264104	46.78	ATSGIETVLK			-0.00254596	1017.57	509.791	1017.57	509.793	2	10	4.1.1.1685.12
fig|11428.3.peg.5183	2	99	LLEEAKEIHREDEEINR		missed K-E@6; missed R-E@10	0.00324559	2122.07	531.524	2122.07	531.524	4	16	1.1.1.1491.7
fig|11428.3.peg.5183	2	99	LQGSTLTALELQR			-0.0014861	1428.79	715.403	1428.79	715.404	2	15	2.1.1.1841.10
fig|11428.3.peg.5183	0.425969	95.84	EIHREDEEINR		missed R-E@4	-0.000214329	1438.68	480.567	1438.68	480.567	3	9	2.1.1.1393.4
fig|11428.3.peg.5183	0.0846002	74.81	YGTATAPMYLAK			-0.00149491	1285.64	643.825	1285.64	643.826	2	11	1.1.1.1593.13
fig|1428.368.peg.6385; fig|11428.3.peg.3266	2	99	LQEAVPEKA		missed K-A@8	-0.00117643	983.528	492.771	983.529	492.772	2	9	4.1.1.1504.14
fig|1428.368.peg.6385; fig|11428.3.peg.3266	2	99	TLADITADTK			-0.000121197	1047.54	524.78	1047.54	524.78	2	12	5.1.1.1684.17
fig|1428.368.peg.6385; fig|11428.3.peg.3266	0.548214	97.21	HIEKEILDIQK		missed K-E@4	-0.0037258	1364.76	683.389	1364.77	683.39	2	12	6.1.1.1477.14
fig|11428.3.peg.5310	2	99	AGNVIGGGDWSIDR			0.00223975	1415.68	708.848	1415.68	708.847	2	18	5.1.1.1889.3
fig|11428.3.peg.5310	1.48149	99	HYNSYTSSEMR			-0.000426062	1373.57	458.863	1373.57	458.863	3	10	2.1.1.1462.5
fig|11428.3.peg.5310	0.454693	96.21	NFNNAFYGK			-0.00167061	1073.49	537.753	1073.49	537.754	2	9	4.1.1.1685.13
fig|11428.3.peg.5310	0.334419	94.09	ILITGHTGFK			-0.0001487	1085.62	362.882	1085.62	362.882	3	10	5.1.1.1690.2
fig|11428.3.peg.5310	0.228413	90.48	EIDPMGGHDIYSSSK			-0.000459888	1634.72	818.369	1634.72	818.37	2	10	5.1.1.1733.25
fig|11428.3.peg.5310	0.0604807	67.19	IGIMVTSDK			0.00369376	962.514	482.264	962.511	482.263	2	8	2.1.1.1655.9
fig|11428.3.peg.71	2	99	EYDVGNEDDVLAYPSQK			-0.00129947	1940.86	971.439	1940.86	971.439	2	25	1.1.1.1692.2
fig|11428.3.peg.71	2	99	VCSTPGTTIRLNGDEK	Carbamidomethyl(C)@2; Deamidated(N)@12	missed R-L@10	-0.00354083	1747.84	874.926	1747.84	874.928	2	19	1.1.1.1493.23
fig|11428.3.peg.71	0.576754	97.42	VCSTPGTTIR	Carbamidomethyl(C)@2		-0.00220111	1090.54	546.278	1090.54	546.279	2	7	4.1.1.1478.18
fig|1428.368.peg.6136; fig|11428.3.peg.5899	2	99	FTDLYNEMYK			0.000472154	1322.59	662.3	1322.59	662.3	2	17	5.1.1.1915.4
fig|1428.368.peg.6136; fig|11428.3.peg.5899	2	99	LILAGIVGDTGR			-0.00219995	1183.69	592.852	1183.69	592.854	2	19	4.1.1.1930.4
fig|1428.368.peg.6136; fig|11428.3.peg.5899	0.514279	96.83	YVSELVDMGVK		cleaved L-Y@N-term	0.00191951	1238.62	620.319	1238.62	620.318	2	11	4.1.1.1846.12
fig|1428.368.peg.6136; fig|11428.3.peg.5899	0.0609802	66.97	FLFPNTTAK			-0.000897826	1037.55	519.784	1037.55	519.785	2	11	2.1.1.1791.5
fig|1428.368.peg.6136; fig|11428.3.peg.5899	0.0150229	93.75	LAMQYNGGGHPMASGAK	Deamidated(N)@6; Oxidation(M)@12		0.00371173	1705.76	569.594	1705.76	569.592	3	11	6.1.1.1404.10
fig|11428.3.peg.1507	2	99	CGIAPPSPK	Carbamidomethyl(C)@1		-0.00143328	925.468	463.741	925.469	463.742	2	10	2.1.1.1511.13
fig|11428.3.peg.1507	2	99	VQMAETLEFSR			-0.00607286	1309.63	655.821	1309.63	655.824	2	17	6.1.1.1650.9
fig|11428.3.peg.1507	0.542118	97.12	IIQGFWR			-0.00238257	918.505	460.26	918.508	460.261	2	10	5.1.1.1918.2
fig|11428.3.peg.1507	0.0423927	58.16	AFSQLKQEGK		missed K-Q@6	-0.00126199	1134.6	379.208	1134.6	379.208	3	6	5.1.1.1514.4
fig|1428.368.peg.3122; fig|11428.3.peg.5752	2	99	GLKDIVIVSPDHGGVTR		missed K-D@3	0.00270756	1761.98	588.333	1761.97	588.332	3	16	5.1.1.1785.16
fig|1428.368.peg.3122; fig|11428.3.peg.5752	2	99	LVANLLETAGATR			-0.00298974	1327.74	664.879	1327.75	664.88	2	17	5.1.1.1933.8
fig|1428.368.peg.3122; fig|11428.3.peg.5752	0.454693	96.13	HIGVGLGK			-0.000585163	779.465	390.74	779.465	390.74	2	8	5.1.1.1542.8
fig|1428.368.peg.3122; fig|11428.3.peg.5752	0.142065	83.87	STQYLNSNLK		cleaved M-S@N-term	0.000925144	1166.59	584.304	1166.59	584.304	2	10	5.1.1.1650.22
fig|1428.368.peg.6322; fig|11428.3.peg.1966	2	99	DADVDGLEVGQEVK			0.00985733	1472.71	737.362	1472.7	737.357	2	14	2.1.1.1758.15
fig|1428.368.peg.6322; fig|11428.3.peg.1966	2	99	RPGSMGPVAPNR			-0.0099139	1237.63	413.549	1237.64	413.552	3	11	5.1.1.1514.6
fig|1428.368.peg.6322; fig|11428.3.peg.1966	0.609065	97.63	KSLVVVQGAVK		missed K-S@1	-0.0018123	1126.71	564.36	1126.71	564.361	2	10	6.1.1.1431.16
fig|11428.3.peg.4527	2	99	FSTDEAVVEIAK			-0.00110038	1307.66	654.837	1307.66	654.838	2	16	4.1.1.1808.5
fig|11428.3.peg.4527	2	99	VSQKEEMNIEDSAR		missed K-E@4	-0.00124647	1634.76	818.385	1634.76	818.386	2	13	6.1.1.1415.26
fig|11428.3.peg.4527	0.555955	97.2	LFENGKEAEVTSADR		missed K-E@6	0.0138922	1664.81	833.414	1664.8	833.408	2	11	1.1.1.1495.21
fig|11428.3.peg.4527	0.0371573	54.32	YTDVHIDTK			-6.64765e-05	1090.53	364.517	1090.53	364.517	3	6	1.1.1.1382.3
fig|11428.3.peg.4527	0.0282604	47.29	VLLISR			-0.00231967	699.462	350.738	699.464	350.739	2	6	4.1.1.1648.2
fig|11428.3.peg.476	2	99	HIPGHSVNTYVWR			0.00119023	1564.79	522.604	1564.79	522.604	3	17	6.1.1.1491.14
fig|11428.3.peg.476	2	99	NEQATLHSQTVGSR			-0.000387023	1526.74	509.922	1526.74	509.922	3	14	4.1.1.1425.4
fig|11428.3.peg.476	0.653647	97.9	LAAENPDYSGK			0.000898683	1163.55	582.781	1163.55	582.78	2	9	4.1.1.1477.14
fig|11428.3.peg.5175	2	99	SVTVPCRESEESESESESESNNSGR	Carbamidomethyl(C)@6	missed R-E@7	0.0119032	2771.15	924.725	2771.14	924.721	3	15	4.1.1.1514.23
fig|11428.3.peg.5175	2	99	WLECECEDDFEK	Carbamidomethyl(C)@4; Carbamidomethyl(C)@6		0.00278326	1658.63	830.32	1658.62	830.319	2	15	4.1.1.1784.21
fig|11428.3.peg.5175	0.661543	97.94	DLIGSFVR			-0.00174189	905.495	453.755	905.497	453.756	2	12	4.1.1.1950.2
fig|11428.3.peg.5175	0.0452752	59.38	NEKGELYYYQIR		missed K-G@3	0.00758827	1574.78	525.934	1574.77	525.932	3	11	4.1.1.1727.10
fig|11428.3.peg.6122	2	99	FIDSNNITNIK			-3.16121e-06	1277.66	639.838	1277.66	639.838	2	17	5.1.1.1796.8
fig|11428.3.peg.6122	1.92082	99	VDNPVSNLVR			0.00163889	1111.6	556.807	1111.6	556.807	2	14	5.1.1.1824.12
fig|11428.3.peg.6122	0.798603	98.59	ILSLLNK			2.29758e-05	799.517	400.766	799.517	400.766	2	8	4.1.1.1762.2
fig|11428.3.peg.6122	0.00921731	22.44	IFSYLGK			-0.00162754	826.457	414.236	826.459	414.237	2	6	4.1.1.1743.4
fig|11428.3.peg.3015	2	99	LGGHFSGGSVLHWEEGNDGK			0.00671237	2081.96	521.498	2081.96	521.496	4	20	5.1.1.1819.11
fig|11428.3.peg.3015	2	99	VVKENANEAVER		missed K-E@3	-0.00118241	1356.7	453.24	1356.7	453.241	3	16	4.1.1.1379.3
fig|11428.3.peg.3015	0.570248	97.28	LYNAFHR			0.000535193	919.467	460.741	919.466	460.741	2	9	4.1.1.1546.6
fig|11428.3.peg.3015	0.16877	86.22	KVEEMVNR		missed K-V@1	-0.000473983	1003.51	502.763	1003.51	502.763	2	8	6.1.1.1282.9
fig|11428.3.peg.3015	0.00656377	16.7	VKPLQFNR			-0.00188359	1000.58	501.297	1000.58	501.298	2	7	5.1.1.1613.13
fig|11428.3.peg.1703	2	99	ELSAHMHQLTVSPTK			-0.00461502	1677.85	839.93	1677.85	839.933	2	16	1.1.1.1479.24
fig|11428.3.peg.1703	2	99	QFIEQQQLQR			-0.00232135	1316.68	659.348	1316.68	659.349	2	14	2.1.1.1638.8
fig|11428.3.peg.1703	0.425969	95.64	QFIEQQQLQREEAQK		missed R-E@10	0.00175459	1901.96	634.994	1901.96	634.994	3	13	6.1.1.1490.18
fig|11428.3.peg.1703	0.394695	95.11	QLEGFLEEFK			0.00132895	1238.62	620.317	1238.62	620.316	2	12	6.1.1.2063.4
fig|11428.3.peg.3147	2	99	ALQNQGHIVAMTGDGVNDAPAIK			-0.00665938	2319.16	774.06	2319.16	774.062	3	14	4.1.1.1743.23
fig|11428.3.peg.3147	2	99	KVEALQGQDVAIGDQK		missed K-V@1	0.00768626	1697.9	849.958	1697.89	849.955	2	19	6.1.1.1468.24
fig|11428.3.peg.3147	0.632644	97.73	EVQAAIHSLGSQALR			0.00275475	1578.85	790.433	1578.85	790.431	2	11	5.1.1.1773.22
fig|11428.3.peg.3147	0.235077	90.4	ELAAPQVTVMR			0.00262291	1213.65	607.833	1213.65	607.832	2	9	4.1.1.1748.13
fig|11428.3.peg.1991	2	99	ILAEAGISEETR			0.000983287	1287.67	644.841	1287.67	644.841	2	18	3.1.1.1699.15
fig|11428.3.peg.1991	1.36653	99	IAGVDIPR			0.00161946	839.488	420.751	839.487	420.751	2	10	6.1.1.1545.2
fig|11428.3.peg.1991	1.33724	99	VRDLTEDELGR		missed R-D@2	0.00333407	1301.66	434.894	1301.66	434.893	3	13	5.1.1.1643.7
fig|11428.3.peg.1991	0.173925	86.56	IKVEGDLRR		missed K-V@2; missed R-R@8	-0.00321731	1084.63	362.551	1084.64	362.552	3	8	2.1.1.1453.2
fig|11428.3.peg.2100	2	99	NDEFVPFLTLPGYEIL			0.00160546	1865.95	933.981	1865.95	933.98	2	16	3.1.1.3949.4
fig|11428.3.peg.2100	2	99	VTLVGEMLPAYSEILTPEVLSFLK			-0.0040263	2648.43	883.819	2648.44	883.82	3	22	3.1.1.4111.2
fig|11428.3.peg.2100	0.580044	97.34	NNPEANEAAFEK			0.00132367	1332.6	667.305	1332.59	667.305	2	13	2.1.1.1545.5
fig|11428.3.peg.2100	0.314258	93.25	RVEITGPVDR		missed R-V@1	0.00336481	1140.63	381.217	1140.63	381.216	3	8	3.1.1.1584.3
fig|11428.3.peg.4447	2	99	AYGAEVVLTPAEQR			-4.74575e-05	1502.77	752.394	1502.77	752.394	2	15	2.1.1.1748.24
fig|11428.3.peg.4447	2	99	LVGTSPGFIPK			0.0004856	1114.64	558.327	1114.64	558.327	2	14	6.1.1.1601.4
fig|11428.3.peg.4447	0.906578	98.92	GSPVLSGGVPGPHK			0.00390134	1287.7	644.856	1287.69	644.854	2	10	6.1.1.1442.15
fig|1428.368.peg.5668; fig|11428.3.peg.5088	2	99	GFSHCEAGPLVR	Carbamidomethyl(C)@5		-0.00465863	1328.62	665.32	1328.63	665.322	2	13	3.1.1.1633.16
fig|1428.368.peg.5668; fig|11428.3.peg.5088	1.5376	99	VADSVVQMGLK			-0.000856083	1145.61	573.813	1145.61	573.813	2	13	3.1.1.1767.8
fig|1428.368.peg.5668; fig|11428.3.peg.5088	1.45593	99	HVVITAVAR			-0.000206892	964.582	483.298	964.582	483.298	2	10	6.1.1.1394.9
fig|1428.368.peg.3360; fig|11428.3.peg.4533	2	99	TLSGGIDPAAFHRPK			-0.014115	1565.82	522.946	1565.83	522.951	3	16	1.1.1.1531.7
fig|1428.368.peg.3360; fig|11428.3.peg.4533	2	99	VAELVLER			0.000456303	927.539	464.777	927.539	464.777	2	13	6.1.1.1553.3
fig|1428.368.peg.3360; fig|11428.3.peg.4533	1.13668	99	GDVVSSTFDEVPENHIK			0.00553545	1871.9	624.972	1871.89	624.971	3	14	5.1.1.1833.12
fig|1428.368.peg.3913; fig|11428.3.peg.3197	2	99	ADLGLNPSNDGTVIR			0.000732831	1540.79	771.4	1540.78	771.4	2	20	1.1.1.1631.11
fig|1428.368.peg.3913; fig|11428.3.peg.3197	2	99	AGEITEDDLR			0.00207581	1117.53	559.771	1117.53	559.77	2	13	4.1.1.1597.18
fig|1428.368.peg.3913; fig|11428.3.peg.3197	0.987163	99	LLVIQPYDK			-0.00278872	1087.63	544.82	1087.63	544.821	2	13	1.1.1.1646.5
fig|1428.368.peg.3913; fig|11428.3.peg.3197	0.130768	81.73	TSIGDIEK			-0.00136033	861.443	431.729	861.444	431.729	2	7	4.1.1.1549.10
fig|1428.368.peg.3913; fig|11428.3.peg.3197	0.0181814	35.36	NKEKEIMEV		missed K-E@2; missed K-E@4	-0.00213465	1118.56	560.288	1118.56	560.289	2	8	6.1.1.1429.18
fig|1428.368.peg.3913; fig|11428.3.peg.3197	0.0145735	30.46	GYTEDIQKETDKYIAK		missed K-E@8; missed K-Y@12	0.00286663	1900.94	476.243	1900.94	476.243	4	11	5.1.1.1821.10
fig|11428.3.peg.2884	2	99	DSQEAALPSHIR			-0.000472529	1322.66	662.336	1322.66	662.336	2	13	6.1.1.1436.20
fig|11428.3.peg.2884	2	99	YGQEVTQYEQLAR			-0.00282761	1583.76	792.885	1583.76	792.886	2	20	3.1.1.1806.10
fig|11428.3.peg.2884	0.958607	99	LVQAYETR			-0.00185788	978.512	490.263	978.513	490.264	2	8	6.1.1.1377.6
fig|11428.3.peg.2884	0.187755	87.4	NVLLTIPK			-0.0034856	896.566	449.29	896.57	449.292	2	8	4.1.1.1815.4
fig|11428.3.peg.5078	1.82391	99	IHLEPMGIYSK			-0.0086063	1286.66	429.894	1286.67	429.897	3	13	2.1.1.1759.5
fig|11428.3.peg.5078	1.21467	99	LVVGASNVPHAVILEK			0.00600811	1644.96	549.328	1644.96	549.326	3	14	4.1.1.1788.11
fig|11428.3.peg.5078	1.14874	99	ATVKDVVENPK		missed K-D@4	0.0031014	1198.66	400.56	1198.66	400.559	3	7	3.1.1.1536.6
fig|11428.3.peg.5078	0.970616	99	MLALLQK			-0.00323954	815.491	408.753	815.494	408.754	2	8	4.1.1.1773.3
fig|11428.3.peg.213	2	99	ESIQYTNTDKLYR		missed K-L@10	0.00227862	1629.8	815.908	1629.8	815.907	2	18	6.1.1.1499.7
fig|11428.3.peg.213	1.82391	99	SIYVLK			-0.00217733	721.435	361.725	721.437	361.726	2	8	4.1.1.1655.2
fig|11428.3.peg.213	1.31876	99	EDIRDDIVGDIYR		missed R-D@4	0.00427211	1577.77	526.932	1577.77	526.93	3	14	4.1.1.1920.6
fig|11428.3.peg.213	0.0277972	45.38	VAFNMDR			0.000201993	851.396	426.705	851.396	426.705	2	7	5.1.1.1680.6
fig|1428.368.peg.4479; fig|11428.3.peg.710	2	99	MYAIIETGGK			-0.00254232	1081.55	541.78	1081.55	541.781	2	14	1.1.1.1586.4
fig|1428.368.peg.4479; fig|11428.3.peg.710	2	99	VGSPVVEGATVTAK			-0.00311476	1313.72	438.913	1313.72	438.914	3	14	3.1.1.1648.9
fig|1428.368.peg.4479; fig|11428.3.peg.710	0.856985	98.73	LVVEAINA			-0.00346341	827.472	414.743	827.475	414.745	2	10	5.1.1.1855.2
fig|1428.368.peg.4479; fig|11428.3.peg.710	0.346788	93.89	VLFVGGENVK			0.00140997	1060.59	531.304	1060.59	531.303	2	12	4.1.1.1725.4
fig|11428.3.peg.2236	2	99	SMNEAIQDREDLRK		missed R-E@9; missed R-K@13	0.00545149	1703.83	426.965	1703.83	426.964	4	15	5.1.1.1596.4
fig|11428.3.peg.2236	1.88606	99	QCDYHAWANTR	Gln->pyro-Glu@N-term; Carbamidomethyl(C)@2		-0.00352268	1403.56	702.789	1403.57	702.791	2	12	6.1.1.1542.21
fig|11428.3.peg.2236	0.777284	98.42	GNITAMIR			-0.00257384	874.467	438.241	874.469	438.242	2	10	3.1.1.1726.3
fig|11428.3.peg.2236	0.632644	97.62	LKELPNYEK		missed K-E@2	-3.57575e-05	1132.61	378.545	1132.61	378.545	3	10	3.1.1.1587.3
fig|11428.3.peg.6028	2	99	CDNSCVQGIRDELKK	Carbamidomethyl(C)@1; Carbamidomethyl(C)@5	missed R-D@10; missed K-K@14	0.000633657	1820.85	607.958	1820.85	607.958	3	16	6.1.1.1484.18
fig|11428.3.peg.6028	2	99	TYVGTVSSVSCDVVK	Carbamidomethyl(C)@11		-0.00316299	1599.78	800.896	1599.78	800.898	2	17	2.1.1.1763.20
fig|11428.3.peg.6028	0.823909	98.6	TVQINTEGR			0.00981422	1016.53	509.275	1016.53	509.27	2	9	4.1.1.1472.16
fig|11428.3.peg.6028	0.522879	96.66	CDNSCVQGIRDELK	Carbamidomethyl(C)@1; Carbamidomethyl(C)@5	missed R-D@10	0.0120231	1692.77	565.263	1692.76	565.259	3	10	4.1.1.1674.14
fig|11428.3.peg.6028	0.00788851	18.69	QDDCWEVFEECKK	Carbamidomethyl(C)@4; Carbamidomethyl(C)@11	missed K-K@12	0.000380558	1771.72	591.58	1771.72	591.58	3	9	4.1.1.1797.12
fig|11428.3.peg.4249	2	99	VPVSNGENYK	Deamidated(N)@5		-0.000987871	1106.52	554.269	1106.52	554.269	2	16	1.1.1.1362.3
fig|11428.3.peg.4249	2	99	VPVSNGENYKLGEK	Deamidated(N)@5	missed K-L@10	0.00340194	1533.77	512.264	1533.77	512.263	3	16	1.1.1.1453.13
fig|11428.3.peg.4249	1.10237	99	DTANNTSPIKEEQVR	Deamidated(N)@5	cleaved A-D@N-term; missed K-E@10	0.00569682	1701.82	568.282	1701.82	568.28	3	17	5.1.1.1590.8
fig|11428.3.peg.4249	0.272459	97.85	ILRVPVSNGENYK	Deamidated(N)@8	missed R-V@3	-0.0120134	1488.78	497.268	1488.79	497.272	3	13	2.1.1.1672.9
fig|1428.368.peg.6305; fig|11428.3.peg.1983	2	99	AVLELAGVQDILSK			-0.000818056	1454.83	728.424	1454.83	728.424	2	24	1.1.1.2301.4
fig|1428.368.peg.6305; fig|11428.3.peg.1983	2	99	SLGSNTPINMIR			-0.00373248	1301.67	651.843	1301.68	651.845	2	20	1.1.1.1664.9
fig|1428.368.peg.6305; fig|11428.3.peg.1983	0.518557	96.55	FAALVVVGDK			-0.00150344	1017.58	509.8	1017.59	509.8	2	12	5.1.1.1870.5
fig|1428.368.peg.6305; fig|11428.3.peg.1983	0.440093	95.53	AQEVPDAIRK		missed R-K@9	-0.00010859	1125.61	563.814	1125.61	563.814	2	8	5.1.1.1545.21
fig|1428.368.peg.6305; fig|11428.3.peg.1983	0.234331	89.7	IDPSKLELEER		missed K-L@5	0.0103625	1327.71	664.862	1327.7	664.856	2	14	6.1.1.1548.18
fig|1428.368.peg.6305; fig|11428.3.peg.1983	0.196543	87.47	AQEVPDAIR			0.000880769	997.52	499.767	997.519	499.767	2	8	2.1.1.1564.19
fig|11428.3.peg.3056	2	99	MATVTAVQPPGR			-0.00438204	1226.64	614.327	1226.64	614.329	2	13	1.1.1.1493.14
fig|11428.3.peg.3056	2	99	VTLIDTGVNTETGGR			0.00435228	1531.79	766.902	1531.78	766.899	2	19	1.1.1.1595.18
fig|11428.3.peg.3056	0.853872	99	IGEETHLKPK		cleaved K-P@C-term	0.00151116	1150.64	384.553	1150.63	384.552	3	10	2.1.1.1385.5
fig|11428.3.peg.3056	0.429457	95.32	FGSLILDK			-0.00352022	891.503	446.759	891.507	446.761	2	10	5.1.1.1848.6
fig|11428.3.peg.3056	0.137869	81.83	AVILAGGYGTR			-0.0024385	1076.6	539.305	1076.6	539.306	2	11	1.1.1.1543.13
fig|11428.3.peg.4319	2	99	LITNPNHHIIESVHPSPLSAR			0.0046737	2331.25	778.09	2331.24	778.089	3	21	6.1.1.1521.23
fig|11428.3.peg.4319	2	99	TPPSLLNMYK			0.00434319	1162.61	582.312	1162.61	582.31	2	15	5.1.1.1922.5
fig|11428.3.peg.4319	1.4318	99	VNTILANMGER			-0.00226778	1216.62	609.318	1216.62	609.319	2	12	4.1.1.1759.17
fig|1428.368.peg.6298; fig|11428.3.peg.1990	2	99	KVRPSVKPICEK	Carbamidomethyl(C)@10	cleaved M-K@N-term; missed K-V@1	0.00176261	1439.83	480.951	1439.83	480.95	3	14	2.1.1.1374.2
fig|1428.368.peg.6298; fig|11428.3.peg.1990	1.56864	99	VMVICENPK	Carbamidomethyl(C)@5		0.00226486	1088.54	545.276	1088.54	545.275	2	12	4.1.1.1599.14
fig|1428.368.peg.6298; fig|11428.3.peg.1990	0.995679	99	VRPSVKPICEK	Carbamidomethyl(C)@9		-0.000703246	1311.73	438.252	1311.73	438.252	3	9	2.1.1.1419.5
fig|1428.368.peg.6298; fig|11428.3.peg.1990	0.896196	98.8	RPSVKPICEK	Carbamidomethyl(C)@8	cleaved V-R@N-term	-0.00221602	1212.66	405.228	1212.66	405.229	3	9	5.1.1.1446.3
fig|11428.3.peg.2936	2	99	EAVAAGATTQEEIGK			-0.0042442	1473.73	737.871	1473.73	737.873	2	14	5.1.1.1609.25
fig|11428.3.peg.2936	2	99	VVSVSPDFAESTK			-0.00405996	1364.68	683.346	1364.68	683.348	2	15	5.1.1.1767.10
fig|11428.3.peg.2936	0.560667	96.9	TVITSPAFTGSEK			-0.00243875	1336.69	669.35	1336.69	669.351	2	9	4.1.1.1680.19
fig|11428.3.peg.2936	0.555955	96.85	EITLNYLTPHNK			0.001127	1441.76	481.593	1441.76	481.593	3	10	4.1.1.1776.5
fig|11428.3.peg.2936	0.279841	91.48	YQHHGDYNVLAAR			-0.00271413	1542.73	515.251	1542.73	515.252	3	10	5.1.1.1601.17
fig|11428.3.peg.2936	0.14691	82.68	EFAQNAVDTNGR			0.00293463	1320.61	661.312	1320.61	661.31	2	7	5.1.1.1598.25
fig|11428.3.peg.2742	2	99	KYKEELIPKDVVEK		missed K-Y@1; missed K-E@3; missed K-D@9	-0.0016704	1716.96	859.49	1716.97	859.49	2	12	6.1.1.1460.24
fig|11428.3.peg.2742	2	99	YKEELIPKDVVEK		missed K-E@2; missed K-D@8	-0.00350141	1588.87	795.441	1588.87	795.443	2	14	1.1.1.1518.23
fig|11428.3.peg.2742	1.42022	99	NVTWTESMSSFMSK			0.00296784	1633.71	817.865	1633.71	817.863	2	14	6.1.1.2035.4
fig|11428.3.peg.2742	0.0814455	71.11	RLEIACEK	Carbamidomethyl(C)@6	missed R-L@1	0.000939143	1017.53	509.772	1017.53	509.771	2	11	2.1.1.1468.3
fig|11428.3.peg.2742	0.0462403	57.23	LAELSGNR			0.000405294	858.456	430.235	858.456	430.235	2	9	6.1.1.1350.4
fig|11428.3.peg.3240	2	99	VPEEVLHTDGAVSK			-0.000903178	1479.76	740.885	1479.76	740.886	2	18	1.1.1.1459.19
fig|11428.3.peg.3240	2	99	YLAENVKDVLK		missed K-D@7	-0.00247035	1290.72	646.365	1290.72	646.366	2	14	1.1.1.1605.18
fig|11428.3.peg.3240	1.40894	99	YGFYHLYK			0.000485308	1089.53	545.772	1089.53	545.771	2	13	5.1.1.1795.5
fig|11428.3.peg.3240	0.146302	82.53	NFTTGENIYSR			-0.000546494	1300.6	651.309	1300.6	651.31	2	11	4.1.1.1668.11
fig|11428.3.peg.3573	2	99	SHSGDLFIGVDSEYHNK			0.00944781	1903.88	635.634	1903.87	635.631	3	16	6.1.1.1555.19
fig|11428.3.peg.3573	2	99	VELGVLETNPK			-0.0041745	1197.66	599.835	1197.66	599.838	2	16	1.1.1.1627.7
fig|11428.3.peg.3573	1.00436	99	FGFVEEGVK			0.000379069	1010.51	506.261	1010.51	506.261	2	10	4.1.1.1761.8
fig|11428.3.peg.3573	0.628932	99	FRPNGLIVHN	Deamidated(N)@4		0.00237897	1166.62	389.881	1166.62	389.88	3	10	4.1.1.1664.4
fig|11428.3.peg.4179	2	99	ALMLPIAVLPAAGLLLR			0.00188145	1731.09	866.551	1731.08	866.549	2	20	6.1.1.2974.2
fig|11428.3.peg.4179	2	99	VQDLIGNSANVDPSK			-0.00269895	1555.78	778.898	1555.78	778.899	2	16	1.1.1.1550.17
fig|11428.3.peg.4179	1.49485	99	GYSTAELQDK			-0.000311693	1110.52	556.267	1110.52	556.267	2	12	4.1.1.1544.4
fig|11428.3.peg.4179	0.163043	84.23	GYSTAELQDKLGK		missed K-L@10	0.0124405	1408.73	470.585	1408.72	470.581	3	9	4.1.1.1659.8
fig|11428.3.peg.4175	2	99	VRPVHTGTSPGSPYPK			0.00192706	1678.88	560.634	1678.88	560.634	3	15	1.1.1.1342.13
fig|11428.3.peg.4175	2	99	VSVVIPVHNEASTLSK			-0.00352185	1678.92	560.648	1678.93	560.649	3	17	1.1.1.1593.8
fig|11428.3.peg.4175	1.13668	99	VRPEQHEFVNGR	Deamidated(N)@10		0.00618779	1467.73	490.25	1467.72	490.248	3	10	3.1.1.1517.5
fig|11428.3.peg.4175	0.517126	96.38	YSAIIPVSEEK			-0.00614117	1234.64	618.327	1234.64	618.33	2	12	2.1.1.1717.20
fig|11428.3.peg.4175	0.0958256	74.12	YSLGNDVGR			0.00168999	979.474	490.744	979.472	490.743	2	9	2.1.1.1580.10
fig|1428.368.peg.4753; fig|11428.3.peg.972	2	99	IYDWVDERLDITPIWR		missed R-L@8	-0.00423748	2089.06	697.36	2089.06	697.362	3	18	6.1.1.2214.2
fig|1428.368.peg.4753; fig|11428.3.peg.972	2	99	VGIQIAEQTPLIGPYIK			-0.00132143	1839.05	920.532	1839.05	920.533	2	23	6.1.1.2117.11
fig|1428.368.peg.4753; fig|11428.3.peg.972	1.74473	99	IYDWVDER			0.00152738	1094.5	548.26	1094.5	548.259	2	11	4.1.1.1796.8
fig|11428.3.peg.5562	2	99	ALGKPSSVKENGEDKIYVYK	Deamidated(N)@11	missed K-E@9; missed K-I@15	0.00216216	2225.16	557.297	2225.16	557.297	4	20	1.1.1.1480.14
fig|11428.3.peg.5562	2	99	VPNVPFGAHTGDIEEIEK			0.00487091	1950.97	651.332	1950.97	651.33	3	15	5.1.1.1895.7
fig|11428.3.peg.5562	1.26761	99	LITLQEIEK			0.00122637	1085.63	543.824	1085.63	543.824	2	13	5.1.1.1917.2
fig|11428.3.peg.5562	0.493495	96.05	VDHISVFSPEDSINK			0.00249011	1685.83	562.95	1685.83	562.949	3	13	5.1.1.1834.7
fig|11428.3.peg.5562	0.0404816	52.9	NIVFGFNK			0.00118943	937.503	469.759	937.502	469.758	2	9	2.1.1.1830.6
fig|11428.3.peg.2584	2	99	EFKGDDSILSIQK		missed K-G@3	0.00322038	1478.76	740.39	1478.76	740.388	2	16	3.1.1.1782.21
fig|11428.3.peg.2584	2	99	IMLDDEKVEHAYK		missed K-V@7	0.0054308	1589.78	530.934	1589.78	530.933	3	15	5.1.1.1680.16
fig|11428.3.peg.2584	1.55284	99	IWVSSMEEPITK			0.00297914	1418.71	710.365	1418.71	710.363	2	14	5.1.1.1911.14
fig|11428.3.peg.2584	0.249492	89.98	LILVDK			0.00110121	699.454	350.734	699.453	350.734	2	7	4.1.1.1631.2
fig|11428.3.peg.212	2	99	ILDGDKNFLTTLQK		missed K-N@6	-0.00038975	1604.88	535.966	1604.88	535.966	3	18	4.1.1.1873.5
fig|11428.3.peg.212	2	99	SLGVPVVK			0.000924639	797.502	399.758	797.501	399.758	2	10	5.1.1.1715.4
fig|11428.3.peg.212	1.74473	99	IALAGNPNTGK			-0.000538873	1054.58	528.295	1054.58	528.296	2	9	4.1.1.1506.17
fig|11428.3.peg.212	0.0705811	66.98	VFGDTYPAR			0.00128839	1024.5	513.257	1024.5	513.256	2	10	4.1.1.1611.5
fig|11428.3.peg.2867	2	99	AIAPNLNIVFK			-0.000289271	1198.71	600.361	1198.71	600.361	2	15	6.1.1.1989.2
fig|11428.3.peg.2867	2	99	AYNHFEANESLGTLSMRDESK		missed R-D@17	0.00626364	2398.09	600.53	2398.09	600.529	4	19	1.1.1.1604.15
fig|11428.3.peg.2867	1.09691	99	TYGSFIDVAR			-0.00173864	1127.56	564.787	1127.56	564.788	2	13	3.1.1.1849.5
fig|11428.3.peg.2867	0.560667	96.78	HPDVDLYK			6.74141e-06	985.487	493.751	985.487	493.751	2	10	5.1.1.1601.16
fig|11428.3.peg.2867	0.110138	76.74	YIELPEER			-0.000305752	1047.52	524.769	1047.52	524.769	2	10	2.1.1.1709.10
fig|11428.3.peg.2867	0.0555173	60.87	HVEMNYAPTLEIK			0.00362491	1543.77	515.599	1543.77	515.597	3	11	2.1.1.1779.4
fig|11428.3.peg.2867	0.0338583	48	HVEMNYAPTLEIKK		missed K-K@13	0.00388132	1671.87	836.942	1671.87	836.94	2	7	2.1.1.1690.23
fig|11428.3.peg.2867	0.0338583	61.25	QAIFDHLK	Gln->pyro-Glu@N-term		-0.000131269	953.497	477.756	953.497	477.756	2	10	5.1.1.1905.3
fig|11428.3.peg.4211	2	99	KKVEPEEKPETIEIQAVSPK		missed K-K@1; missed K-V@2	-0.00172729	2278.24	760.421	2278.24	760.421	3	16	1.1.1.1487.21
fig|11428.3.peg.4211	2	99	VDELKAEEEPVVAEDGGMK		missed K-A@5	0.00104746	2043.97	682.33	2043.97	682.33	3	18	2.1.1.1706.21
fig|11428.3.peg.4211	1.88606	99	KTEAYIELKQDKEEKK		missed K-T@1; missed K-Q@9; missed K-E@12; missed K-K@15	0.0045819	1979.06	495.773	1979.06	495.772	4	10	2.1.1.1435.7
fig|11428.3.peg.4211	0.0195421	34.19	LTPSVVETLK			0.000674305	1085.63	543.824	1085.63	543.824	2	9	4.1.1.1743.11
fig|11428.3.peg.4211	0.0101054	20.93	ELADFNVVK			-0.00141867	1033.54	517.779	1033.54	517.779	2	9	3.1.1.1817.6
fig|11428.3.peg.5299	2	99	GIEDDGVSQAVTVK			-0.0128435	1416.7	709.356	1416.71	709.362	2	14	2.1.1.1661.21
fig|11428.3.peg.5299	2	99	IGEQTYSTQR			-0.000501745	1181.57	591.791	1181.57	591.791	2	13	2.1.1.1461.13
fig|11428.3.peg.5299	1.92082	99	TFVEVEQPESR			0.00359115	1319.64	660.827	1319.64	660.825	2	12	3.1.1.1691.17
fig|11428.3.peg.81	2	99	FSITTTNFNPNVK			-0.00200112	1481.75	741.882	1481.75	741.883	2	16	2.1.1.1847.10
fig|11428.3.peg.81	2	99	VNDSQVQSNPVLNR			-0.00382227	1568.79	785.401	1568.79	785.403	2	15	2.1.1.1600.24
fig|11428.3.peg.81	1.92082	99	INMELALGR			0.00107389	1015.55	508.782	1015.55	508.781	2	13	2.1.1.1835.2
fig|11428.3.peg.81	0.0329203	47.22	LTQGQQFR			0.0029247	976.512	489.263	976.509	489.262	2	6	6.1.1.1343.14
fig|11428.3.peg.4561	2	99	GTEVEDTGKPISVPVGDVTLGR			-0.00241754	2225.15	1113.58	2225.15	1113.58	2	24	2.1.1.1831.19
fig|11428.3.peg.4561	2	99	VFNVLGDAIDLDGEVPADVHR			-5.06301e-05	2250.13	751.05	2250.13	751.05	3	26	6.1.1.2124.4
fig|11428.3.peg.4561	2	99	VFNVLGDAIDLDGEVPADVHRDPIHR		missed R-D@21	0.0107464	2868.46	718.123	2868.45	718.12	4	25	4.1.1.2016.3
fig|11428.3.peg.5191	2	99	AQAGVALLR			-0.00279322	897.537	449.776	897.54	449.777	2	15	6.1.1.1520.6
fig|11428.3.peg.5191	2	99	FLDNLIENDMNSEVEELKELLK		missed K-E@18	0.00102873	2634.31	879.111	2634.31	879.111	3	23	3.1.1.3564.3
fig|11428.3.peg.5191	2	99	KAQAGVALLR		missed K-A@1	-2.87648e-05	1025.63	513.824	1025.63	513.825	2	13	5.1.1.1623.12
fig|11428.3.peg.5576	2	99	GQTIGMTHGDDLETAEALK			0.00165703	1985.94	662.987	1985.94	662.986	3	17	1.1.1.1607.18
fig|11428.3.peg.5576	2	99	IITDSAADLPVELLQAYDIDLIPLR			0.00542493	2766.51	923.178	2766.51	923.176	3	22	3.1.1.3949.3
fig|11428.3.peg.5576	2	99	IVDIMEER			-0.00354208	1003.5	502.756	1003.5	502.758	2	12	2.1.1.1721.10
fig|11428.3.peg.4999	2	99	AIGVSNFQIR			0.00041141	1103.61	552.812	1103.61	552.812	2	15	3.1.1.1856.4
fig|11428.3.peg.4999	2	99	DAEIKPMINQVEYHPR			0.00594995	1938.97	647.33	1938.96	647.328	3	15	2.1.1.1724.20
fig|11428.3.peg.4999	2	99	VEDGPELVEAVK			-0.00349478	1283.66	642.836	1283.66	642.838	2	17	1.1.1.1617.8
fig|11428.3.peg.3186	2	99	ANMTKPVVGFIGGQTAPAGKR		missed K-R@20	0.00296452	2099.13	525.791	2099.13	525.79	4	16	6.1.1.1548.8
fig|11428.3.peg.3186	2	99	LLGPNCPGVITPDECK	Carbamidomethyl(C)@6; Carbamidomethyl(C)@15		-0.00196374	1768.85	885.431	1768.85	885.432	2	20	2.1.1.1763.22
fig|11428.3.peg.3186	2	99	VIVQGITGSQGLFHTK			0.00143074	1683.93	562.318	1683.93	562.318	3	19	2.1.1.1819.8
fig|11428.3.peg.568	2	99	ETQWDSLLAGLDAK			-0.00437882	1545.76	773.889	1545.77	773.891	2	18	6.1.1.2186.4
fig|11428.3.peg.568	2	99	GAQSLTSNYADIAK			0.000478706	1437.71	719.862	1437.71	719.862	2	19	5.1.1.1771.23
fig|11428.3.peg.568	2	99	IVDTEKEASESGFLFR		missed K-E@6	0.00128565	1826.91	609.976	1826.91	609.976	3	20	4.1.1.1841.5
fig|1428.368.peg.4003	2	99	ALVTFGQTAPK			-0.00405207	1131.62	566.82	1131.63	566.822	2	11	2.1.1.1698.14
fig|1428.368.peg.4003	2	99	ISEAPFVGITGSNGK	Deamidated(N)@13		-0.00430748	1476.74	739.378	1476.75	739.38	2	20	4.1.1.1839.8
fig|1428.368.peg.4003	2	99	SGYAAATLLQK			-0.0131774	1121.59	561.805	1121.61	561.811	2	16	2.1.1.1725.13
fig|11428.3.peg.2660	2	99	AYTCGSAGGNGVVNK	Carbamidomethyl(C)@4; Deamidated(N)@10		0.00129657	1454.65	728.331	1454.65	728.33	2	15	2.1.1.1474.18
fig|11428.3.peg.2660	2	99	LAVYNNEADAR			5.43315e-06	1234.59	618.304	1234.59	618.304	2	15	2.1.1.1554.22
fig|11428.3.peg.2660	2	99	SPYYNSCNQSAVTK	Carbamidomethyl(C)@7		-0.0058048	1617.7	809.859	1617.71	809.862	2	15	4.1.1.1525.17
fig|11428.3.peg.4965	2	99	ALQQLIADVR			-0.00109027	1125.65	563.832	1125.65	563.833	2	15	4.1.1.1913.5
fig|11428.3.peg.4965	2	99	AVLLLHGFTGNSADVR			0.0032337	1668.9	557.307	1668.89	557.306	3	18	4.1.1.1856.4
fig|11428.3.peg.4965	2	99	WYEDSTHVITLDK			0.00511261	1605.77	803.894	1605.77	803.891	2	16	5.1.1.1836.20
fig|11428.3.peg.3742	2	99	DSYTEIVGK			0.00411711	1010.5	506.255	1010.49	506.253	2	14	2.1.1.1649.5
fig|11428.3.peg.3742	2	99	NYKDCMQNSEEIQIPGDGHK	Carbamidomethyl(C)@5	missed K-D@3	0.00200606	2362.03	788.352	2362.03	788.351	3	17	6.1.1.1531.23
fig|11428.3.peg.3742	2	99	TSLTQDQMFDIQK			0.00391627	1553.74	777.879	1553.74	777.877	2	22	2.1.1.1826.10
fig|11428.3.peg.2554	2	99	EMGYGQNPFAK			-0.000942207	1240.55	621.284	1240.55	621.285	2	15	1.1.1.1609.13
fig|11428.3.peg.2554	2	99	TSINAPFNTMR			-0.00481218	1250.6	626.309	1250.61	626.311	2	16	2.1.1.1752.9
fig|11428.3.peg.2554	2	99	WDASGHQQGTFEYQK			0.000654993	1780.78	891.398	1780.78	891.398	2	24	1.1.1.1497.7
fig|11428.3.peg.3755	2	99	EANINTQDVGAK		cleaved M-E@N-term	-0.00153233	1258.61	630.314	1258.62	630.315	2	15	5.1.1.1549.5
fig|11428.3.peg.3755	2	99	KPSLLGMITSPSEQFER			0.0054508	1918.99	640.67	1918.98	640.668	3	24	5.1.1.2152.2
fig|11428.3.peg.3755	2	99	MEANINTQDVGAK			-0.00233212	1389.65	695.834	1389.66	695.835	2	15	1.1.1.1458.15
fig|11428.3.peg.1663	2	99	AEEIHYNVSLEK			-0.0026588	1430.7	716.358	1430.7	716.359	2	16	3.1.1.1700.21
fig|11428.3.peg.1663	2	99	ITNDRAEEIHYNVSLEK		missed R-A@5	-0.00311066	2030	1016.01	2030.01	1016.01	2	23	1.1.1.1521.7
fig|11428.3.peg.1663	2	99	ITNDRAEEIHYNVSLEKK		missed R-A@5; missed K-K@17	-0.00176391	2158.1	720.374	2158.1	720.375	3	18	1.1.1.1479.19
fig|11428.3.peg.3551	2	99	ARPLLQYNQTLQR			-0.00278473	1599.88	534.301	1599.88	534.302	3	17	1.1.1.1542.14
fig|11428.3.peg.3551	2	99	ETALQFGVPAAFLKDESLLTTR		missed K-D@14	0.00130769	2406.28	803.101	2406.28	803.1	3	21	6.1.1.2244.4
fig|11428.3.peg.3551	2	99	ILSGHGEDVLNVK			-0.00292129	1379.74	690.876	1379.74	690.878	2	18	1.1.1.1530.22
fig|11428.3.peg.1914	2	99	ADGGYWIR			0.000375376	936.446	469.23	936.445	469.23	2	12	2.1.1.1718.5
fig|11428.3.peg.1914	2	99	DGNVISEYK			0.00191435	1023.49	512.752	1023.49	512.751	2	11	2.1.1.1606.15
fig|11428.3.peg.1914	2	99	DGNVISEYKHYTK		missed K-H@9	-0.00163747	1552.75	777.383	1552.75	777.383	2	18	3.1.1.1684.9
fig|11428.3.peg.1914	0.00568285	36.79	ATVTNGKGVYNDGK	Deamidated(N)@5	missed K-G@7	-0.000361033	1423.69	475.572	1423.69	475.572	3	7	5.1.1.1498.8
fig|11428.3.peg.1727	2	99	AVAQMQSELAK			-0.000529875	1174.6	588.308	1174.6	588.308	2	19	2.1.1.1583.7
fig|11428.3.peg.1727	2	99	GDAIVTIGGLHGTIESVDETK			0.00514938	2111.08	704.701	2111.07	704.699	3	24	4.1.1.1912.6
fig|11428.3.peg.1727	2	99	SGGSHLTFDR			0.00109152	1075.51	359.509	1075.5	359.509	3	14	4.1.1.1502.2
fig|11428.3.peg.1727	0.0136762	25.5	QKAVAQMQSELAK		missed K-A@2	-0.000254824	1430.76	477.926	1430.76	477.926	3	9	6.1.1.1435.7
fig|11428.3.peg.5198	2	99	DDTGFYAGDLLGLAK			-0.00314075	1554.75	778.384	1554.76	778.386	2	16	6.1.1.2196.6
fig|11428.3.peg.5198	2	99	NVPDQVLQSLYIK			-0.00268469	1515.83	758.921	1515.83	758.922	2	15	6.1.1.2068.9
fig|11428.3.peg.5198	2	99	NYAIAITETATPR			-0.00153227	1419.73	710.874	1419.74	710.875	2	16	3.1.1.1817.15
fig|11428.3.peg.5198	0.0245682	38.27	GYYPAYDLK			-0.00136832	1088.52	545.265	1088.52	545.266	2	10	6.1.1.1589.6
fig|11428.3.peg.654	2	99	ATTNLEIQEVTK		cleaved A-A@N-term	-0.0026613	1345.71	673.86	1345.71	673.862	2	18	2.1.1.1687.19
fig|11428.3.peg.654	2	99	TTNLEIQEVTK		cleaved A-T@N-term	-0.00195289	1274.67	638.342	1274.67	638.343	2	18	1.1.1.1543.19
fig|11428.3.peg.654	2	99	YYSMSSYEVSQK	Oxidation(M)@4		0.00219012	1486.63	744.323	1486.63	744.322	2	15	2.1.1.1561.11
fig|11428.3.peg.654	0.00744648	15.85	KMNFTAK		missed K-M@1	-0.00137307	838.436	420.225	838.437	420.226	2	5	1.1.1.1319.5
fig|11428.3.peg.654	0.00612309	91.6	TNLEIQEVTK		cleaved T-T@N-term	-0.00892182	1173.62	587.815	1173.62	587.819	2	15	5.1.1.1722.11
fig|11428.3.peg.2709	2	99	ELILAANKEQQ		missed K-E@8	-0.000177496	1255.68	628.846	1255.68	628.846	2	14	2.1.1.1621.22
fig|11428.3.peg.2709	2	99	ETVVGTDPEEVGLEAADR			-0.00663621	1885.88	943.949	1885.89	943.953	2	17	4.1.1.1827.20
fig|11428.3.peg.2709	2	99	LALTQTNWFIDQLK			-0.0026274	1689.91	845.96	1689.91	845.962	2	23	6.1.1.2218.3
fig|11428.3.peg.2709	0.0254883	38.79	ELILAANK			-0.00241321	870.515	436.265	870.517	436.266	2	8	2.1.1.1616.6
fig|11428.3.peg.2712	2	99	HGIPHHINR			-0.000874473	1079.57	360.865	1079.57	360.865	3	10	4.1.1.1312.2
fig|11428.3.peg.2712	2	99	MVNSGTEATMSALR			-0.00623352	1466.68	734.347	1466.69	734.35	2	13	4.1.1.1691.18
fig|11428.3.peg.2712	2	99	VIGGGLPVGAYGGK			-0.000447105	1243.69	622.853	1243.69	622.854	2	17	1.1.1.1621.5
fig|11428.3.peg.2712	0.048177	55.13	VPSIEIVR			-0.000238725	911.544	456.779	911.544	456.779	2	10	5.1.1.1799.5
fig|11428.3.peg.2712	0.0204516	33.64	GTSFGAPTEIENK			0.00203812	1349.65	675.831	1349.65	675.83	2	9	4.1.1.1657.20
fig|11428.3.peg.3865	2	99	ALEYGLIDK			-0.00238797	1020.55	511.281	1020.55	511.282	2	15	5.1.1.1822.6
fig|11428.3.peg.3865	2	99	DTDRDNFMTAEK		missed R-D@4	0.00310322	1441.62	721.816	1441.61	721.814	2	13	2.1.1.1563.21
fig|11428.3.peg.3865	1.22185	99	TGQPLEVLQR			0.00286369	1139.63	570.824	1139.63	570.822	2	15	5.1.1.1778.11
fig|11428.3.peg.3865	0.924453	98.72	EKLNQILADR		missed K-L@2	0.00122155	1198.67	400.563	1198.67	400.563	3	13	6.1.1.1523.3
fig|11428.3.peg.3865	0.00788851	15.84	LIPTVIEQTNR		cleaved N-L@N-term	-0.00114163	1282.72	642.369	1282.72	642.37	2	8	4.1.1.1742.16
fig|1428.368.peg.5590; fig|11428.3.peg.5015	2	99	FEELYTESATHIDEIAER			0.00826021	2152	718.342	2152	718.339	3	15	4.1.1.1898.7
fig|1428.368.peg.5590; fig|11428.3.peg.5015	2	99	ILAIGGKPVATMK			-0.000960861	1297.78	649.896	1297.78	649.897	2	18	3.1.1.1722.23
fig|1428.368.peg.5590; fig|11428.3.peg.5015	2	99	LHNFHWYVK			-0.00346231	1242.63	622.32	1242.63	622.322	2	15	1.1.1.1547.16
fig|1428.368.peg.5590; fig|11428.3.peg.5015	0.161151	82.38	HAWMLR			0.00100602	812.413	407.214	812.412	407.213	2	8	6.1.1.1477.2
fig|11428.3.peg.3462	2	99	MFGSFGCCDNFR	Carbamidomethyl(C)@7; Carbamidomethyl(C)@8		0.000346418	1496.56	749.289	1496.56	749.289	2	18	4.1.1.1886.7
fig|11428.3.peg.3462	2	99	MFGSFGCCDNFRDCHHHER	Carbamidomethyl(C)@7; Carbamidomethyl(C)@8; Carbamidomethyl(C)@14	missed R-D@12	-0.00868469	2467.93	494.594	2467.94	494.596	5	15	6.1.1.1487.5
fig|11428.3.peg.3462	2	99	VCPTDIVAIAI	Carbamidomethyl(C)@2		0.00191233	1170.63	586.324	1170.63	586.323	2	15	5.1.1.2731.2
fig|11428.3.peg.3462	0.198596	85.77	NTFTGILR			0.0010369	920.509	461.262	920.508	461.261	2	11	6.1.1.1614.2
fig|11428.3.peg.2407	2	99	AVEGAEDREELAEEDLK		missed R-E@8	0.00266302	1901.89	634.97	1901.89	634.969	3	18	2.1.1.1650.9
fig|11428.3.peg.2407	2	99	NLMVDVQSTNEK			-0.0026966	1376.66	689.336	1376.66	689.338	2	13	5.1.1.1728.16
fig|11428.3.peg.2407	2	99	YAQSVGASTASISCNK	Carbamidomethyl(C)@14		-0.000448482	1642.76	822.388	1642.76	822.388	2	13	2.1.1.1566.26
fig|11428.3.peg.2407	0.160522	82.19	TMNLDEMSIK			0.00600535	1180.55	591.284	1180.55	591.281	2	10	5.1.1.1855.9
fig|11428.3.peg.2407	0.0268721	39.69	TPYVIGGLK			-5.95955e-05	946.549	474.282	946.549	474.282	2	10	5.1.1.1796.3
fig|11428.3.peg.2407	0.0213631	34.21	MVQGFIAGGLK			-0.000998256	1119.61	560.812	1119.61	560.813	2	8	4.1.1.1816.12
fig|11428.3.peg.1826	2	99	AMQVEATDEQTK			0.00212404	1349.62	675.815	1349.61	675.814	2	13	6.1.1.1345.21
fig|11428.3.peg.1826	2	99	EGVEVIEAVGK			0.000131597	1128.6	565.309	1128.6	565.309	2	18	1.1.1.1599.6
fig|11428.3.peg.1826	2	99	SLLQGMEMVHR			0.00175037	1299.64	434.222	1299.64	434.222	3	13	5.1.1.1859.2
fig|11428.3.peg.1826	0.112946	75.36	LQADFENYK			-0.00348796	1126.53	564.27	1126.53	564.272	2	10	1.1.1.1550.6
fig|11428.3.peg.1826	0.106238	74.02	LQADFENYKR		missed K-R@9	0.008552	1282.64	428.554	1282.63	428.551	3	11	5.1.1.1665.6
fig|11428.3.peg.2332	2	99	AILNITDVTK			-0.0031138	1086.63	544.32	1086.63	544.322	2	15	4.1.1.1839.3
fig|11428.3.peg.2332	2	99	EGEVVGLVGPNGAGK	Deamidated(N)@11		-0.00833789	1382.7	692.355	1382.7	692.359	2	18	2.1.1.1710.19
fig|11428.3.peg.2332	2	99	LGLAQAILGNPK			-4.69575e-05	1193.71	597.864	1193.71	597.864	2	20	4.1.1.1938.4
fig|11428.3.peg.2332	0.145087	80.24	IIVGLIR			0.00506529	782.543	392.279	782.538	392.276	2	9	5.1.1.1865.2
fig|11428.3.peg.2332	0.0996329	72.54	TLLNFFASK			-0.00116925	1039.57	520.792	1039.57	520.792	2	11	6.1.1.2058.2
fig|11428.3.peg.2661	2	99	ATDLSSYYDGKNPATTK		cleaved A-A@N-term; missed K-N@11	0.000298308	1830.86	916.439	1830.86	916.439	2	18	1.1.1.1528.26
fig|11428.3.peg.2661	2	99	SVDSNSGNGAIK	Deamidated(N)@8		0.00520649	1148.54	575.275	1148.53	575.273	2	12	6.1.1.1247.5
fig|11428.3.peg.2661	2	99	VYGGSTTCDADGFNAK	Carbamidomethyl(C)@8		-0.000893996	1661.7	831.856	1661.7	831.857	2	19	1.1.1.1479.23
fig|11428.3.peg.2661	0.332547	99	TDLSSYYDGKNPATTK		cleaved A-T@N-term; missed K-N@10	0.00522237	1759.83	587.618	1759.83	587.616	3	15	1.1.1.1530.15
fig|11428.3.peg.4523	2	99	IGAYGLTEPGSGSDAGGMK			-0.00109488	1766.81	884.414	1766.81	884.415	2	20	2.1.1.1736.9
fig|11428.3.peg.4523	2	99	ITQIYEGTQEIQR			-0.00302207	1577.8	789.908	1577.8	789.91	2	18	1.1.1.1554.13
fig|11428.3.peg.4523	2	99	LADMATDVEAAR			0.00306442	1261.6	631.807	1261.6	631.806	2	16	4.1.1.1677.19
fig|11428.3.peg.4523	0.35164	92.61	HQFGKPIAAQQGIGFK			0.0072179	1725.94	863.977	1725.93	863.973	2	10	1.1.1.1513.23
fig|11428.3.peg.2009	2	99	LVQVSTDEVYGSLGK			0.000732378	1593.83	797.92	1593.82	797.92	2	18	2.1.1.1832.10
fig|11428.3.peg.2009	2	99	VGEVYNIGGNNEK			0.000535555	1391.67	696.842	1391.67	696.841	2	17	2.1.1.1612.13
fig|11428.3.peg.2009	1.82391	99	TPLAPNSPYSSSK			0.00168152	1347.67	674.842	1347.67	674.841	2	10	4.1.1.1571.24
fig|11428.3.peg.2009	0.399027	93.83	SLQDHPNYSFVK			0.00400046	1433.7	478.907	1433.69	478.905	3	12	3.1.1.1705.6
fig|11428.3.peg.2009	0.122629	76.76	DIEYVTDR			0.00261732	1009.47	505.744	1009.47	505.743	2	7	4.1.1.1622.11
fig|11428.3.peg.3352	2	99	GLDSFWIEKR		missed K-R@9	-0.00188694	1249.64	417.555	1249.65	417.556	3	15	5.1.1.1934.2
fig|11428.3.peg.3352	2	99	SVIDDHGYHIHKEDLEDKGGKA		missed K-E@12; missed K-G@18; missed K-A@21	0.00541095	2462.19	411.372	2462.18	411.371	6	16	6.1.1.1434.3
fig|11428.3.peg.3352	2	99	TLEWTMPAPTPEYNFK			-0.00154305	1923.91	962.96	1923.91	962.961	2	19	6.1.1.2064.8
fig|11428.3.peg.3352	0.450997	94.82	SVIDDHGYHIHKEDLEDK		missed K-E@12	0.00727432	2149.01	538.261	2149.01	538.259	4	13	5.1.1.1650.19
fig|11428.3.peg.5861	2	99	LSEYGLQLQEK			-0.00379789	1306.67	654.344	1306.68	654.346	2	19	5.1.1.1815.7
fig|11428.3.peg.5861	2	99	QLVNHGHIMVDGAR	Gln->pyro-Glu@N-term		-0.0139674	1528.74	765.379	1528.76	765.386	2	15	5.1.1.1740.24
fig|11428.3.peg.5861	2	99	RPYAPGPHGPNQR			0.000259048	1445.73	482.917	1445.73	482.916	3	13	6.1.1.1265.4
fig|11428.3.peg.5861	0.394695	93.65	LDNLVYR			-0.00221786	891.479	446.747	891.481	446.748	2	10	2.1.1.1637.7
fig|11428.3.peg.5861	0.0496351	54.78	ELEKRPYAPGPHGPNQR		missed K-R@4	0.00213	1944.99	649.339	1944.99	649.338	3	8	6.1.1.1320.17
fig|11428.3.peg.5861	0.0127808	22.89	HMYGMTER			0.00118302	1023.43	512.721	1023.43	512.721	2	6	2.1.1.1463.8
fig|11428.3.peg.2763	2	99	KVTTTQDGYINVK		missed K-V@1	-0.00156584	1465.78	733.895	1465.78	733.896	2	13	6.1.1.1425.23
fig|11428.3.peg.2763	2	99	VEGTPDAGTTTDPK			-0.00119218	1387.65	694.83	1387.65	694.831	2	13	2.1.1.1432.17
fig|11428.3.peg.2763	1.85387	99	HQIASNDIKDINAK		missed K-D@9	0.00938087	1565.83	522.949	1565.82	522.946	3	11	1.1.1.1394.12
fig|11428.3.peg.2763	0.619789	96.92	VTEPKVEGTPDAGTTTDPK		missed K-V@5	0.00462589	1941.96	648.327	1941.95	648.325	3	9	2.1.1.1534.25
fig|11428.3.peg.258	2	99	IAPLVNEVVGK			-0.00337422	1137.67	569.843	1137.68	569.845	2	14	3.1.1.1836.11
fig|11428.3.peg.258	2	99	NVEITDEVEAINK			0.00496538	1472.74	737.378	1472.74	737.375	2	17	2.1.1.1804.9
fig|11428.3.peg.258	1.58503	99	KAEIVTTYHEGIEPDKK		missed K-A@1; missed K-K@16	0.00582227	1957.02	653.348	1957.02	653.346	3	12	1.1.1.1418.22
fig|11428.3.peg.258	0.815309	99	SKEPIQSIIDGR		missed K-E@2	-0.0258876	1341.7	448.24	1341.73	448.249	3	12	2.1.1.1724.6
fig|11428.3.peg.258	0.075204	65.11	AEIVTTYHEGIEPDKK		missed K-K@15	-0.00784659	1828.91	610.645	1828.92	610.648	3	7	2.1.1.1581.19
fig|11428.3.peg.2121	2	99	DLGLTAPEQLK			0.00697937	1183.65	592.833	1183.64	592.83	2	16	6.1.1.1651.10
fig|11428.3.peg.2121	2	99	IIKDYNSDAEK		missed K-D@3	-0.00351274	1294.64	432.553	1294.64	432.554	3	12	2.1.1.1416.4
fig|11428.3.peg.2121	1.33724	99	YLEKELEGAK		missed K-E@4	0.00120904	1178.62	393.88	1178.62	393.88	3	10	5.1.1.1623.4
fig|11428.3.peg.2121	1.16115	99	VAPTFPVSHVSTNWEDNLK			0.0070125	2140.07	714.363	2140.06	714.36	3	14	4.1.1.1919.5
fig|11428.3.peg.1279	2	99	CSGGVCSIFK	Carbamidomethyl(C)@1; Carbamidomethyl(C)@6		0.00100019	1113.5	557.755	1113.49	557.755	2	17	6.1.1.1584.5
fig|11428.3.peg.1279	2	99	NLQPGEVVTVTGK			-0.00382604	1340.73	447.916	1340.73	447.917	3	14	5.1.1.1748.6
fig|11428.3.peg.1279	1.3279	99	MFLCNLFR	Carbamidomethyl(C)@4		-0.00103285	1099.53	550.772	1099.53	550.773	2	13	6.1.1.2125.3
fig|11428.3.peg.1279	1.12494	99	EIESVTFSS			-0.000593852	997.46	499.737	997.46	499.737	2	12	4.1.1.1766.4
fig|11428.3.peg.1279	0.0467237	52.82	ISCKEIESVTFSS	Carbamidomethyl(C)@3	missed K-E@4	0.00527876	1485.71	743.861	1485.7	743.858	2	11	5.1.1.1896.7
fig|11428.3.peg.5626	2	99	ALGHTVYDDTDEVGATQSQNLNNIIR			0.0583612	2843.43	948.816	2843.37	948.797	3	24	4.1.1.1871.15
fig|11428.3.peg.5626	2	99	YSLHGGHNSIVQGANFGNR			0.00444859	2026.98	676.666	2026.97	676.665	3	26	5.1.1.1696.9
fig|11428.3.peg.5626	2	99	YSLHGGHNSIVQGANFGNRK		missed R-K@19	0.00634488	2155.07	539.776	2155.07	539.774	4	21	5.1.1.1644.10
fig|11428.3.peg.5626	0.522879	99	QRTDLAVLNGTK	Gln->pyro-Glu@N-term; Deamidated(N)@9	missed R-T@2	-0.00357731	1298.68	650.347	1298.68	650.349	2	12	5.1.1.1771.20
fig|11428.3.peg.845	2	99	GAGNLGLDPDSCK	Carbamidomethyl(C)@12		-0.0019739	1302.59	652.3	1302.59	652.301	2	13	4.1.1.1610.23
fig|11428.3.peg.845	2	99	NRPDVLSPQVK			-0.00662105	1251.69	418.236	1251.69	418.238	3	10	4.1.1.1534.11
fig|11428.3.peg.845	2	99	TIGLGQTGPHTNR			0.000174882	1350.7	451.241	1350.7	451.241	3	12	2.1.1.1504.6
fig|11428.3.peg.845	0.408935	93.85	NAILEIGEK			-0.00287738	985.542	493.778	985.544	493.779	2	9	4.1.1.1713.10
fig|11428.3.peg.845	0.132533	77.71	NVFIVK		cleaved D-N@N-term	-0.00201075	718.436	360.225	718.438	360.226	2	7	5.1.1.1719.2
fig|11428.3.peg.3853	2	99	ALCTEETPCIIVTR	Carbamidomethyl(C)@3; Carbamidomethyl(C)@9		-0.00296905	1661.81	831.912	1661.81	831.913	2	17	2.1.1.1801.23
fig|11428.3.peg.3853	2	99	MGVNAAQQFSER			0.000154362	1336.62	669.317	1336.62	669.317	2	16	5.1.1.1721.11
fig|11428.3.peg.3853	2	99	NQDVPDELLQASR			0.0029258	1483.73	742.872	1483.73	742.871	2	17	5.1.1.1892.9
fig|11428.3.peg.3853	0.530178	95.87	LTNYLEGK			0.000456888	936.492	469.253	936.492	469.253	2	10	5.1.1.1689.9
fig|11428.3.peg.3853	0.0132283	23.34	LGLDEEKMK		missed K-M@7	0.00261329	1061.55	354.856	1061.54	354.855	3	6	2.1.1.1548.2
fig|11428.3.peg.3853	0.00966115	18.14	ESGMPLLR			-0.000915922	901.468	451.741	901.469	451.742	2	8	3.1.1.1758.8
fig|11428.3.peg.1607	2	99	ALSILDQVIETIR			-0.00164551	1469.84	735.929	1469.85	735.93	2	16	6.1.1.2475.2
fig|11428.3.peg.1607	2	99	RPTLMTLPK			-0.00138438	1055.61	352.879	1055.62	352.879	3	9	2.1.1.1661.2
fig|11428.3.peg.1607	1.48149	99	ILDAYIGHQK			0.00384478	1156.63	386.55	1156.62	386.549	3	12	1.1.1.1509.3
fig|11428.3.peg.1607	1.07572	99	TVGNVIGNYHPHGDSSVYEAMVR			0.017139	2501.19	626.306	2501.18	626.301	4	14	4.1.1.1810.4
fig|11428.3.peg.1607	0.0109954	19.73	IVVELKK		missed K-K@6	0.00249283	827.55	414.783	827.548	414.781	2	6	1.1.1.1419.5
fig|11428.3.peg.1829	2	99	GYGQGDQYVVVR			-0.000883085	1339.65	670.833	1339.65	670.833	2	14	2.1.1.1672.19
fig|11428.3.peg.1829	2	99	HCSGSGQVSVEQNTPFGR	Carbamidomethyl(C)@2		0.00100366	1945.87	649.631	1945.87	649.631	3	18	1.1.1.1495.14
fig|11428.3.peg.1829	2	99	IPAGIDNGQQIR			-0.000683328	1280.68	641.349	1280.68	641.349	2	18	5.1.1.1674.15
fig|11428.3.peg.1829	0.563837	96.24	IPAGTQTGTEFR			0.000226169	1276.64	639.328	1276.64	639.328	2	10	5.1.1.1641.19
fig|11428.3.peg.1829	0.0231917	34.58	KYHPDVSKEENAIEK		missed K-Y@1; missed K-E@8	0.00405127	1785.89	596.305	1785.89	596.304	3	8	6.1.1.1382.19
fig|11428.3.peg.1829	0.0154727	70.99	LKIPAGTQTGTEFR	Deamidated(Q)@8	missed K-I@2	0.0132341	1518.82	507.28	1518.8	507.275	3	12	5.1.1.1735.11
fig|11428.3.peg.4720	2	99	NLDGLTVNIKPQPR			-0.00805556	1563.87	782.94	1563.87	782.944	2	13	2.1.1.1752.17
fig|11428.3.peg.4720	1.88606	99	QVLNLSSPTEIR			-0.00207982	1355.74	678.877	1355.74	678.878	2	14	3.1.1.1833.5
fig|11428.3.peg.4720	1.58503	99	VLQNVSAR			-0.00436688	885.499	443.757	885.503	443.759	2	8	3.1.1.1493.9
fig|11428.3.peg.4720	0.454693	94.66	KQQVSLLLK		missed K-Q@1	-0.00102102	1055.67	528.842	1055.67	528.842	2	11	3.1.1.1674.7
fig|11428.3.peg.4720	0.371611	92.84	STEVNLFESK			0.00102097	1152.57	577.291	1152.57	577.29	2	12	1.1.1.1602.6
fig|11428.3.peg.4720	0.315155	94.58	QAIDQTIDRK	Gln->pyro-Glu@N-term	missed R-K@9	-0.00319486	1169.6	585.808	1169.6	585.809	2	10	3.1.1.1637.11
fig|11428.3.peg.4720	0.0218195	33.03	DSVIAPLYQK			-0.00304319	1132.61	567.312	1132.61	567.314	2	10	3.1.1.1802.9
fig|11428.3.peg.5931	2	99	HSTAHLLAQALKR		missed K-R@12	0.00171949	1444.83	723.421	1444.83	723.42	2	12	1.1.1.1457.26
fig|11428.3.peg.5931	2	99	IVNENLEIVR			-0.00112929	1197.67	599.843	1197.67	599.843	2	15	6.1.1.1581.4
fig|11428.3.peg.5931	1.65758	99	LLSVAGAYWR			-0.000380443	1134.62	568.316	1134.62	568.317	2	13	4.1.1.1922.3
fig|11428.3.peg.5931	0.632644	96.91	KAELDEHLR		missed K-A@1	0.000920826	1109.58	370.869	1109.58	370.868	3	8	6.1.1.1325.2
fig|11428.3.peg.5931	0.308035	90.78	HSTAHLLAQALK			-0.00258644	1288.72	645.369	1288.73	645.37	2	10	6.1.1.1461.18
fig|11428.3.peg.5931	0.0245682	35.54	ITFPDGAVK			-0.00338374	946.509	474.262	946.512	474.263	2	9	2.1.1.1712.5
fig|11428.3.peg.5931	0.0227338	33.93	YEMSGALSGLQR			0.00181383	1310.63	656.323	1310.63	656.322	2	10	2.1.1.1793.13
fig|11428.3.peg.4471	2	99	GVAFTQNEREELGLK		missed R-E@9	0.000330323	1689.87	564.297	1689.87	564.297	3	15	3.1.1.1800.11
fig|11428.3.peg.4471	2	99	LAVYTAAVGIDPSR			-0.000855763	1431.77	716.893	1431.77	716.893	2	17	4.1.1.1845.10
fig|11428.3.peg.4471	1.69897	99	GAEVLSTPLLNK			-0.00156376	1240.7	621.358	1240.7	621.359	2	12	2.1.1.1813.12
fig|11428.3.peg.4471	0.581699	96.4	VNLSDNDIK			-0.000375784	1016.51	509.264	1016.51	509.264	2	9	4.1.1.1566.12
fig|11428.3.peg.4471	0.37366	92.85	VGVSEEESYKR		missed K-R@10	0.00233598	1281.62	428.215	1281.62	428.214	3	9	3.1.1.1520.7
fig|11428.3.peg.2464	2	99	ADWITTYPFNALFDEGAHITGHPSSK			3.98785e-05	2874.36	719.598	2874.36	719.598	4	25	6.1.1.2232.3
fig|11428.3.peg.2464	2	99	DVPPYAIVAGNPAK			-0.000761453	1410.75	706.382	1410.75	706.383	2	16	5.1.1.1861.17
fig|11428.3.peg.2464	2	99	GAIPLLLSDKIDEFFTSPEKEST		missed K-I@10; missed K-E@20	0.00399021	2536.3	846.44	2536.29	846.439	3	20	1.1.1.2688.2
fig|11428.3.peg.2464	0.67162	97.23	YDIGDYTYSK			0.00305119	1223.54	612.776	1223.53	612.775	2	12	4.1.1.1733.9
fig|11428.3.peg.3816	2	99	AAQAQPAQAPAEQAAPANNGGQAQKEEPKKEEPK	Deamidated(N)@19	missed K-E@25; missed K-K@29; missed K-E@30	0.013302	3482.72	697.551	3482.7	697.548	5	17	1.1.1.1349.16
fig|11428.3.peg.3816	2	99	KTPEQNPAPTPPDTGVIGK		missed K-T@1	0.00149919	1946.01	649.678	1946.01	649.678	3	17	6.1.1.1466.15
fig|11428.3.peg.3816	2	99	TPEQNPAPTPPDTGVIGK			0.00105001	1817.92	909.966	1817.92	909.965	2	16	5.1.1.1718.26
fig|11428.3.peg.3816	0.688246	99	AAQAQPAQAPAEQAAPANNGGQAQKEEPK	Deamidated(N)@19	missed K-E@25	0.00445276	2871.38	958.134	2871.37	958.132	3	13	6.1.1.1365.23
fig|11428.3.peg.3816	0.0154727	73.87	AAQAQPAQAPAEQAAPANNGGQAQKEEPKKEEPKKEEPK	Deamidated(Q)@13	missed K-E@25; missed K-K@29; missed K-E@30; missed K-K@34; missed K-E@35	0.0150082	4094.05	683.348	4094.03	683.346	6	10	6.1.1.1317.20
fig|11428.3.peg.1670	2	99	FLWNWDKQSEPVYETTLADLQK		missed K-Q@7	0.00477997	2710.33	904.452	2710.33	904.45	3	22	6.1.1.2195.6
fig|11428.3.peg.1670	2	99	TLVDIKDLKPGDSVK		missed K-D@6	-0.0288634	1626.89	543.304	1626.92	543.314	3	16	1.1.1.1605.11
fig|11428.3.peg.1670	2	99	TLVDIKDLKPGDSVKK		missed K-D@6; missed K-K@15	0.000886475	1755.02	586.012	1755.01	586.012	3	19	1.1.1.1541.12
fig|11428.3.peg.1670	0.686133	97.33	GDNAGEDFGK			0.000547006	1008.42	505.215	1008.41	505.215	2	8	6.1.1.1318.6
fig|11428.3.peg.1670	0.0227338	33.56	DIFAPEWGEK			-0.00109031	1190.56	596.287	1190.56	596.288	2	10	4.1.1.1931.3
fig|11428.3.peg.5488	2	99	LRPYESIVYR			-0.00788811	1294.7	432.572	1294.7	432.575	3	15	3.1.1.1729.3
fig|11428.3.peg.5488	2	99	SVVYQIYPK			-0.0182698	1095.58	548.796	1095.6	548.805	2	14	3.1.1.1764.10
fig|11428.3.peg.5488	1.4318	99	ALADKESVFYHYK		missed K-E@5	0.00979048	1569.79	524.271	1569.78	524.268	3	14	1.1.1.1533.12
fig|11428.3.peg.5488	1.20761	99	VHEYLQEMNR			0.00221198	1317.62	440.212	1317.61	440.212	3	11	2.1.1.1580.5
fig|11428.3.peg.5488	0.0287242	38.86	ALADKESVFYHYKK		missed K-E@5; missed K-K@13	-0.00059902	1697.88	425.477	1697.88	425.477	4	11	1.1.1.1484.3
fig|11428.3.peg.5488	0.0195421	29.95	LREEVYDMMR		missed R-E@2	-0.0124696	1340.61	671.312	1340.62	671.318	2	10	3.1.1.1761.15
fig|11428.3.peg.5488	0.0150229	24.81	FWLDK			-0.00194155	707.362	354.688	707.364	354.689	2	5	2.1.1.1767.2
fig|11428.3.peg.5488	0.00966115	17.52	ANFDFIK			0.00140277	853.435	427.725	853.433	427.724	2	7	2.1.1.1810.2
fig|11428.3.peg.4215	2	99	NAQNIATQSVEVAR			0.0102136	1499.78	750.897	1499.77	750.892	2	13	6.1.1.1493.20
fig|11428.3.peg.4215	2	99	TELNEQTAQDVR			-0.00114259	1402.67	702.341	1402.67	702.342	2	13	5.1.1.1609.24
fig|11428.3.peg.4215	1.76955	99	INTAFITTIPIFK			-0.00661842	1477.85	739.931	1477.85	739.935	2	14	6.1.1.2231.6
fig|11428.3.peg.4215	0.950782	98.67	GMQETQQIEEQNKR		missed K-R@13	0.0068029	1717.81	573.611	1717.81	573.609	3	10	5.1.1.1541.16
fig|11428.3.peg.5892	2	99	FTQAFHGSSYIDEANK			0.00333209	1813.83	605.617	1813.83	605.616	3	21	1.1.1.1545.13
fig|11428.3.peg.5892	2	99	TVYHAGDTALFSDMK			-0.00536146	1654.76	828.388	1654.77	828.39	2	19	2.1.1.1782.26
fig|11428.3.peg.5892	2	99	VILIDPFLTGNPK			-0.00476128	1425.82	713.916	1425.82	713.919	2	16	6.1.1.2145.2
fig|11428.3.peg.5892	0.764472	97.82	VSYHGHSVVK			-0.00255944	1111.57	371.532	1111.58	371.533	3	12	4.1.1.1384.2
fig|1428.368.peg.6143	2	99	AELEFEKPVVELR		cleaved M-A@N-term	0.00507398	1557.85	520.289	1557.84	520.287	3	18	2.1.1.1845.7
fig|1428.368.peg.6143	2	99	NSQMDFSEEIR			-0.00162755	1354.58	678.298	1354.58	678.298	2	15	1.1.1.1615.8
fig|1428.368.peg.6143	2	99	TFEQLNGISKDELIEK	Deamidated(N)@6	missed K-D@10	-1.89504e-05	1863.95	622.323	1863.95	622.323	3	16	2.1.1.1811.6
fig|1428.368.peg.6143	0.774691	97.87	GMPVTVIGHQR			-0.00234793	1193.63	597.823	1193.63	597.824	2	10	2.1.1.1591.23
fig|11428.3.peg.1828	2	99	DALQEIVQQLTVK			-0.00120116	1483.82	742.919	1483.82	742.92	2	22	1.1.1.2728.2
fig|11428.3.peg.1828	2	99	EALQAAIEKNELEEIR		missed K-N@9	-0.00831034	1854.96	928.487	1854.97	928.492	2	21	2.1.1.1850.18
fig|11428.3.peg.1828	2	99	EQAITIQSSSGLSDEEVER			0.00385136	2076.98	693.336	2076.98	693.334	3	19	3.1.1.1796.11
fig|11428.3.peg.1828	0.815309	99	TIQSSSGLSDEEVER		cleaved I-T@N-term	0.0109219	1635.77	818.892	1635.76	818.887	2	13	3.1.1.1649.25
fig|11428.3.peg.3206	2	99	ISVYAENTDVDPVGSCVGPK	Carbamidomethyl(C)@16		0.00497054	2106	703.007	2105.99	703.005	3	19	2.1.1.1800.10
fig|11428.3.peg.3206	2	99	IVDELKGEKIDIVR		missed K-G@6; missed K-I@9	-0.0182908	1625.92	407.486	1625.94	407.491	4	16	3.1.1.1763.5
fig|11428.3.peg.3206	2	99	VEALLPVSEQMPNEQYKPHDR			0.00411634	2479.22	620.812	2479.22	620.811	4	18	2.1.1.1770.13
fig|11428.3.peg.3206	0.769551	97.83	FIYVSLGK			-0.00129471	925.526	463.77	925.527	463.771	2	8	4.1.1.1833.2
fig|11428.3.peg.3206	0.048177	51.92	GPQIYVSR			0.0104797	918.503	460.259	918.492	460.253	2	10	4.1.1.1559.4
fig|11428.3.peg.211	2	99	IGEFVQIEK			-0.00278586	1061.57	531.794	1061.58	531.795	2	15	3.1.1.1792.4
fig|11428.3.peg.211	2	99	LLDLGFIPGATIK			0.00142826	1356.8	679.409	1356.8	679.408	2	20	1.1.1.2347.2
fig|11428.3.peg.211	2	99	SANIKPLSEFK		cleaved V-S@N-term	0.00241643	1232.68	411.9	1232.68	411.899	3	14	6.1.1.1520.4
fig|11428.3.peg.211	0.809668	98.05	VSANIKPLSEFK		cleaved M-V@N-term	-0.00225539	1331.74	444.921	1331.74	444.922	3	12	3.1.1.1762.2
fig|11428.3.peg.211	0.0105502	18.47	IQLEGTMK			-0.00210986	918.482	460.248	918.484	460.25	2	9	6.1.1.1465.7
fig|11428.3.peg.4936	2	99	APFAATSSVAYAEQLHGK	Deamidated(Q)@14		0.0224731	1847.93	616.983	1847.91	616.976	3	17	2.1.1.1776.20
fig|11428.3.peg.4936	2	99	HMNPCGVGVGTNIHEAYTR	Carbamidomethyl(C)@5		-0.000166722	2111.96	704.995	2111.96	704.995	3	23	1.1.1.1501.23
fig|11428.3.peg.4936	1.95861	99	EFTEPAVVAVK			-0.00457141	1188.63	595.324	1188.64	595.327	2	14	1.1.1.1610.12
fig|11428.3.peg.4936	0.882729	98.38	TLHPNIHGGLLAVR			-0.00331564	1496.85	499.959	1496.86	499.96	3	12	5.1.1.1754.9
fig|11428.3.peg.1978	2	99	ALDNAVEELTQITGQKPVVTR			-0.00119146	2281.23	761.416	2281.23	761.417	3	22	6.1.1.2053.4
fig|11428.3.peg.1978	2	99	IVINTGVGDAVSNSK			-0.000295901	1472.78	737.399	1472.78	737.399	2	18	2.1.1.1700.26
fig|11428.3.peg.1978	1.67778	99	GMDIVIVTTAK			0.00021869	1146.63	574.323	1146.63	574.323	2	13	4.1.1.1829.7
fig|11428.3.peg.1978	0.728158	97.53	LREGMPIGAK		missed R-E@2	-0.00287591	1070.59	536.301	1070.59	536.303	2	9	6.1.1.1403.15
fig|11428.3.peg.1978	0.438899	94.09	SVMQVPK			-0.000498265	787.426	394.72	787.426	394.72	2	8	2.1.1.1536.5
fig|11428.3.peg.1978	0.0433514	48.96	EITPALVSK			-0.00291276	956.551	479.283	956.554	479.284	2	8	2.1.1.1628.11
fig|11428.3.peg.4289	2	99	GVNVTIVQDEAGR			0.0235612	1356.72	679.369	1356.7	679.357	2	17	6.1.1.1555.22
fig|11428.3.peg.4289	1.39794	99	HGGQNYVEIADLVDK			-0.0007239	1656.81	553.277	1656.81	553.278	3	14	4.1.1.1867.7
fig|11428.3.peg.4289	1.3098	99	LVEVGYANEGK			-4.63191e-05	1177.6	589.806	1177.6	589.806	2	10	5.1.1.1658.19
fig|11428.3.peg.4289	1.21467	99	AIEGPTSGIVGGK			-0.00323493	1184.64	593.326	1184.64	593.327	2	11	6.1.1.1484.15
fig|11428.3.peg.4289	1	98.79	NEVIMLK			-0.000333273	845.468	423.741	845.468	423.741	2	9	5.1.1.1720.6
fig|11428.3.peg.5424	2	99	ILVLGAGGVGGFFGGR			-0.00219229	1475.82	738.919	1475.82	738.92	2	17	6.1.1.2171.5
fig|11428.3.peg.5424	2	99	LVEKGEDVTFLVR		missed K-G@4	0.000183198	1503.83	502.284	1503.83	502.284	3	19	6.1.1.1632.5
fig|11428.3.peg.5424	2	99	TSPFDVILFSTK			-0.00349815	1353.71	677.865	1353.72	677.866	2	15	6.1.1.2212.4
fig|11428.3.peg.5424	0.821023	98.07	LVFGEIK			-0.00237059	804.472	403.243	804.475	403.245	2	8	4.1.1.1774.3
fig|11428.3.peg.5424	0.132533	76.39	APIGPIR			-0.00249269	722.441	362.228	722.444	362.229	2	6	4.1.1.1550.2
fig|11428.3.peg.3028	2	99	KLIAVDITK		missed K-L@1	-0.00169132	999.631	500.823	999.633	500.824	2	15	2.1.1.1650.3
fig|11428.3.peg.3028	2	99	MTGTNEENTKWIER		missed K-W@10	0.00973223	1707.8	570.273	1707.79	570.27	3	15	6.1.1.1474.5
fig|11428.3.peg.3028	1.88606	99	STSNLNEISK		cleaved M-S@N-term	-0.00252369	1091.54	546.779	1091.55	546.78	2	12	6.1.1.1366.18
fig|11428.3.peg.3028	0.649752	96.89	NGVQLFHFK			-0.00123254	1088.58	363.866	1088.58	363.866	3	12	5.1.1.1852.2
fig|11428.3.peg.3028	0.431798	93.88	TSNLNEISK		cleaved S-T@N-term	0.000808318	1004.51	503.265	1004.51	503.264	2	7	4.1.1.1473.10
fig|11428.3.peg.3028	0.0109954	18.85	LIAVDITK			-0.0020035	871.536	436.775	871.538	436.776	2	9	5.1.1.1776.3
fig|11428.3.peg.2844	2	99	LLTFPVDLYEVGEELVVTAELPGIQK			0.00132442	2871.55	958.192	2871.55	958.191	3	25	5.1.1.4420.2
fig|11428.3.peg.2844	2	99	VSVKEEILEEEEEQTSHNYYR		missed K-E@4	0.0120711	2610.22	871.081	2610.21	871.077	3	23	5.1.1.1889.4
fig|11428.3.peg.2844	1.79588	99	LPQQHDILSID			0.000109439	1277.66	639.838	1277.66	639.838	2	14	2.1.1.1823.8
fig|11428.3.peg.2844	1.23657	99	ASYQNGVLEIR	Deamidated(N)@5		-0.00171177	1249.63	625.822	1249.63	625.822	2	14	5.1.1.1832.21
fig|11428.3.peg.1732	2	99	QLSSLLNAGALPVDLKEMYSTSVGAK		missed K-E@16	-0.00272101	2691.41	898.145	2691.42	898.146	3	17	6.1.1.2239.8
fig|11428.3.peg.1732	2	99	YGTDPNVSTVSPTIGK			-0.00632634	1634.81	818.412	1634.82	818.415	2	15	4.1.1.1681.26
fig|11428.3.peg.1732	1.58503	99	TLGVLSKDEIAK		missed K-D@7	-0.00117083	1272.73	425.25	1272.73	425.25	3	13	5.1.1.1707.6
fig|11428.3.peg.1732	1.49485	99	VQLAGVQDQQK			0.0142035	1212.66	607.337	1212.65	607.33	2	11	4.1.1.1525.13
fig|11428.3.peg.1732	0.0181814	39.7	QAVTVSDVHK	Gln->pyro-Glu@N-term		-0.00939746	1065.54	533.775	1065.55	533.78	2	9	4.1.1.1552.21
fig|11428.3.peg.2173	2	99	ATYFVETFTNLLNK			-0.00468651	1659.85	830.93	1659.85	830.933	2	20	6.1.1.2263.5
fig|11428.3.peg.2173	2	99	TELHHFPALK			0.0048002	1191.64	398.222	1191.64	398.221	3	11	1.1.1.1476.3
fig|11428.3.peg.2173	1.63827	99	HFEQFYLK			0.00181854	1110.55	556.283	1110.55	556.282	2	13	4.1.1.1725.6
fig|11428.3.peg.2173	1.06048	98.95	NVNLMAFSK			-0.00253667	1022.52	512.267	1022.52	512.268	2	13	5.1.1.1890.3
fig|11428.3.peg.2173	0.300162	89.9	AVEMTGYLR			-0.00212663	1038.51	520.265	1038.52	520.266	2	11	5.1.1.1785.11
fig|11428.3.peg.2173	0.0736576	62.24	DVSLELK			-0.00138282	802.442	402.228	802.444	402.229	2	8	5.1.1.1750.2
fig|11428.3.peg.2173	0.0213631	31.3	EECYYLLK	Carbamidomethyl(C)@3		-0.000229362	1116.52	559.265	1116.52	559.265	2	8	4.1.1.1774.13
fig|11428.3.peg.1290	2	99	AAIIQFTR			-0.00150823	918.527	460.271	918.529	460.272	2	13	4.1.1.1744.6
fig|11428.3.peg.1290	2	99	ANSISPGPFPNTEVQK			-0.00130902	1684.84	843.428	1684.84	843.428	2	17	1.1.1.1585.22
fig|11428.3.peg.1290	2	99	YGANVMIVSR	Oxidation(M)@6		0.0027962	1124.57	563.291	1124.56	563.29	2	16	1.1.1.1498.10
fig|11428.3.peg.1290	1.14874	99	MNQHELFSLK			0.00272277	1245.62	416.214	1245.62	416.213	3	11	2.1.1.1739.2
fig|11428.3.peg.5850	2	99	EVTYAELMQGANK			0.00424812	1452.7	727.355	1452.69	727.353	2	18	5.1.1.1893.13
fig|11428.3.peg.5850	2	99	GVVHTHAWAYAHLR			-0.0189414	1616.81	809.414	1616.83	809.423	2	14	6.1.1.1469.24
fig|11428.3.peg.5850	2	99	TALETESDRLEMAK		missed R-L@9	0.00410265	1592.78	797.395	1592.77	797.393	2	19	5.1.1.1715.23
fig|11428.3.peg.5850	0.537602	95.56	AIVSYEPYIR			-0.00461468	1209.63	605.825	1209.64	605.827	2	12	5.1.1.1884.8
fig|11428.3.peg.5850	0.406714	93.17	IGNAFIK			-0.00100238	761.443	381.729	761.444	381.729	2	9	5.1.1.1683.4
fig|11428.3.peg.5850	0.270026	88.37	LALIWQDDKGNRR		missed K-G@9; missed R-R@12	0.0050539	1583.86	528.96	1583.85	528.958	3	11	5.1.1.1761.10
fig|11428.3.peg.1813	2	99	AVKPSCLTIINR	Carbamidomethyl(C)@6		-0.00163723	1370.77	457.93	1370.77	457.931	3	16	1.1.1.1533.10
fig|11428.3.peg.1813	2	99	THEKFDEDLECVDQQFNK	Carbamidomethyl(C)@11	missed K-F@4	0.00802208	2281	571.258	2281	571.256	4	17	5.1.1.1848.14
fig|11428.3.peg.1813	2	99	VLEEHVGDMFHK			-0.00278408	1439.68	720.849	1439.69	720.851	2	18	1.1.1.1541.21
fig|11428.3.peg.1813	1.17393	99	NISTPLVIK			-0.00310004	983.598	492.807	983.602	492.808	2	11	5.1.1.1810.9
fig|11428.3.peg.1813	0.0419142	47.23	IIPSITNR			0.000327029	912.54	457.277	912.539	457.277	2	8	6.1.1.1494.5
fig|11428.3.peg.3539	2	99	IVNMTYEGKPVADDQK			0.00991468	1806.89	603.305	1806.88	603.301	3	16	3.1.1.1650.13
fig|11428.3.peg.3539	2	99	TDNKVGLVQTATLVNK		missed K-V@4	-0.0049586	1699.94	567.655	1699.95	567.656	3	16	3.1.1.1746.11
fig|11428.3.peg.3539	1.74473	99	NRVDPSYTHPLYR		missed R-V@2	0.00215501	1616.81	539.943	1616.81	539.943	3	12	3.1.1.1625.14
fig|11428.3.peg.3539	1.46852	99	DEQTGESTVNLR		cleaved A-D@N-term	0.00385805	1347.63	674.822	1347.63	674.821	2	13	2.1.1.1547.18
fig|11428.3.peg.3539	0.0199966	29.14	LVNEIKDEHQATIDYVNTPVGK		missed K-D@6	0.0100915	2482.28	828.434	2482.27	828.431	3	9	2.1.1.1722.18
fig|1428.368.peg.4740; fig|11428.3.peg.959	2	99	AVDAVFDSILEALK			0.00204935	1489.8	745.91	1489.8	745.909	2	24	1.1.1.3197.2
fig|1428.368.peg.4740; fig|11428.3.peg.959	2	99	GRNPQTGEEIEIAASK		missed R-N@2	-0.00278726	1698.85	850.433	1698.85	850.434	2	19	1.1.1.1465.16
fig|1428.368.peg.4740; fig|11428.3.peg.959	2	99	NPQTGEEIEIAASK			-0.00425006	1485.73	743.871	1485.73	743.873	2	24	1.1.1.1523.13
fig|1428.368.peg.4740; fig|11428.3.peg.959	1.24413	99	KGRNPQTGEEIEIAASK		missed K-G@1; missed R-N@3	0.00493709	1826.95	457.746	1826.95	457.744	4	10	6.1.1.1401.9
fig|11428.3.peg.2953	2	99	AGFKELTEIQK		missed K-E@4	0.00323862	1262.69	421.904	1262.69	421.903	3	14	1.1.1.1556.3
fig|11428.3.peg.2953	2	99	SLVEHTYIICER	Carbamidomethyl(C)@10		-0.00883279	1518.74	507.254	1518.75	507.257	3	14	2.1.1.1715.7
fig|11428.3.peg.2953	2	99	TIVFDEFDQIVK			-0.00275137	1452.75	727.381	1452.75	727.382	2	17	6.1.1.2130.3
fig|11428.3.peg.2953	0.931814	98.5	RIMHMGDVK		missed R-I@1	-0.00286717	1085.54	362.856	1085.55	362.856	3	7	5.1.1.1506.2
fig|11428.3.peg.2953	0.185087	82.24	MMGAVQDVIK			0.00962564	1090.56	546.288	1090.55	546.283	2	10	2.1.1.1755.7
fig|11428.3.peg.2953	0.0979971	68.86	ILELIR			-0.00143377	755.489	378.752	755.491	378.753	2	7	5.1.1.1850.2
fig|11428.3.peg.2953	0.0268721	35.7	EGTVVSLVTPQEER			-0.00584455	1542.78	772.399	1542.79	772.402	2	9	2.1.1.1778.20
fig|11428.3.peg.2953	0.0181814	27.31	DLAVEPQLVR			-0.00334974	1138.63	570.323	1138.63	570.325	2	10	5.1.1.1851.8
fig|11428.3.peg.5080	2	99	NLIDENNSVLVQR			-0.00332742	1512.79	757.4	1512.79	757.402	2	18	5.1.1.1846.22
fig|11428.3.peg.5080	2	99	TGTTAFVSLADEAK			0.00249599	1409.71	705.86	1409.7	705.859	2	17	2.1.1.1826.8
fig|11428.3.peg.5080	2	99	TGTTAFVSLADEAKEK		missed K-E@14	-0.00375912	1666.84	556.62	1666.84	556.621	3	19	1.1.1.1629.8
fig|11428.3.peg.5080	1.12494	99	FGAVDLLAK			-0.00249331	932.531	467.273	932.533	467.274	2	9	4.1.1.1876.2
fig|11428.3.peg.5080	0.146302	77.67	AQLVEVIER			-0.00356712	1055.59	528.804	1055.6	528.806	2	11	3.1.1.1779.7
fig|11428.3.peg.4673	2	99	FDAAIIEDTVAK			-0.00128278	1291.66	646.84	1291.67	646.84	2	15	4.1.1.1932.4
fig|11428.3.peg.4673	2	99	VGVQTGSIQEEK			-0.00147814	1273.65	637.832	1273.65	637.833	2	19	4.1.1.1522.21
fig|11428.3.peg.4673	2	99	YIGKELGYEVK		missed K-E@4	-0.0030628	1297.69	649.852	1297.69	649.853	2	15	3.1.1.1683.14
fig|11428.3.peg.4673	1.23657	99	VLVMGTSADYKPYEYVDASK			0.00232523	2235.08	746.034	2235.08	746.033	3	14	4.1.1.1859.12
fig|11428.3.peg.4673	0.0510982	52.06	QVDFQVEGR			0.00209514	1076.53	539.271	1076.53	539.27	2	10	1.1.1.1513.7
fig|11428.3.peg.5523	2	99	AAFIGGFSSTSNVR			0.00107247	1412.71	707.36	1412.7	707.36	2	13	2.1.1.1794.14
fig|11428.3.peg.5523	2	99	VNNHAEGDYIALDSEEPGKEER		missed K-E@19	0.00614032	2471.13	824.716	2471.12	824.714	3	16	1.1.1.1511.24
fig|11428.3.peg.5523	1.58503	99	LVAIEDTDGKLNDTIK		missed K-L@10	-0.00465899	1743.92	582.314	1743.93	582.316	3	13	2.1.1.1743.14
fig|11428.3.peg.5523	0.603801	96.3	FVTNFEAR			-0.00331427	982.484	492.249	982.487	492.251	2	10	1.1.1.1544.7
fig|11428.3.peg.5523	0.563837	95.84	LDSGDMAYLSK			-0.00312376	1198.55	600.283	1198.55	600.284	2	14	2.1.1.1731.3
fig|11428.3.peg.5523	0.493495	99	KLLDEAGFTNTK		missed K-L@1	-0.001776	1335.7	446.241	1335.7	446.242	3	14	1.1.1.1528.6
fig|11428.3.peg.5523	0.0486625	50.62	MNYIQTVR			0.00366976	1023.52	512.768	1023.52	512.766	2	8	2.1.1.1644.6
fig|11428.3.peg.4174	2	99	EAAHIINEEMPEK		cleaved I-E@N-term	-5.64803e-05	1509.71	755.864	1509.71	755.864	2	18	5.1.1.1665.22
fig|11428.3.peg.4174	2	99	IDPANSQYSVQAIPK			0.00127418	1629.84	815.926	1629.84	815.925	2	14	2.1.1.1738.25
fig|11428.3.peg.4174	2	99	VYQSVSLDEEK			0.00336339	1295.63	648.821	1295.62	648.82	2	13	1.1.1.1484.15
fig|11428.3.peg.4174	0.640165	99	AHIINEEMPEK		cleaved A-A@N-term	0.00402015	1309.64	655.826	1309.63	655.824	2	10	1.1.1.1438.18
fig|11428.3.peg.4174	0.545155	95.59	LFENIQR			-9.15954e-05	918.492	460.253	918.492	460.253	2	11	2.1.1.1653.7
fig|11428.3.peg.4174	0.129011	74.85	KIDSIIKGESYIPDVSSK		missed K-I@1; missed K-G@7	0.000200324	1978.06	660.361	1978.06	660.361	3	12	2.1.1.1789.20
fig|11428.3.peg.4174	0.0118872	19.1	GHTVLGLDK			-0.00620001	938.512	470.263	938.519	470.267	2	7	2.1.1.1528.14
fig|1428.368.peg.4238; fig|11428.3.peg.4386	2	99	EKIEDNPSHPTLIVTR		missed K-I@2	-0.00745053	1847.97	924.991	1847.97	924.994	2	13	1.1.1.1494.26
fig|1428.368.peg.4238; fig|11428.3.peg.4386	2	99	IEDNPSHPTLIVTR			0.015602	1590.85	796.433	1590.84	796.426	2	17	3.1.1.1686.17
fig|1428.368.peg.4238; fig|11428.3.peg.4386	1.58503	99	GVGYYLRDPEQE		missed R-D@7	0.00188673	1424.66	713.337	1424.66	713.336	2	12	5.1.1.1819.22
fig|1428.368.peg.4238; fig|11428.3.peg.4386	1.11351	99	REENIELTHR		missed R-E@1	-0.00315944	1295.66	432.892	1295.66	432.893	3	8	4.1.1.1436.3
fig|1428.368.peg.4238; fig|11428.3.peg.4386	0.69037	97.08	RGVGYYLRDPEQE		missed R-G@1; missed R-D@8	-0.00819343	1580.75	527.924	1580.76	527.927	3	13	1.1.1.1555.15
fig|11428.3.peg.2010	2	99	GYILSADNHR			0.00205127	1144.56	573.29	1144.56	573.289	2	13	3.1.1.1599.9
fig|11428.3.peg.2010	2	99	MKVVETNFTDAK		missed K-V@2	0.000691361	1381.69	691.853	1381.69	691.853	2	19	6.1.1.1481.15
fig|11428.3.peg.2010	2	99	VVETNFTDAK			0.00211233	1122.56	562.286	1122.56	562.285	2	14	3.1.1.1619.16
fig|11428.3.peg.2010	1.37675	99	GFFSESYNK			-0.000535336	1077.48	539.745	1077.48	539.746	2	13	3.1.1.1762.5
fig|11428.3.peg.2010	0.015923	24.41	KVVETNFTDAK		cleaved M-K@N-term; missed K-V@1	-0.00384415	1250.65	417.89	1250.65	417.891	3	7	2.1.1.1507.6
fig|11428.3.peg.2018	2	99	ELEHYVSEIVR			-0.00137973	1372.7	687.356	1372.7	687.357	2	18	1.1.1.1661.6
fig|11428.3.peg.2018	2	99	HEYTSYQDIVLTK			0.000568354	1595.78	798.899	1595.78	798.899	2	16	2.1.1.1746.24
fig|11428.3.peg.2018	2	99	HFIQIGALKPNEK			-0.000910306	1493.83	498.952	1493.84	498.952	3	19	1.1.1.1541.7
fig|11428.3.peg.2018	1.40894	99	VLDVGCGVGR	Carbamidomethyl(C)@6		-0.00311004	1030.52	516.267	1030.52	516.269	2	13	4.1.1.1617.8
fig|11428.3.peg.2115	2	99	IDTQSNEESHTVPTTPGQIEFGK			0.00012625	2514.19	839.07	2514.19	839.07	3	18	6.1.1.1597.19
fig|11428.3.peg.2115	2	99	SLDIEPNIHPIR			-0.003139	1402.75	468.592	1402.76	468.593	3	15	2.1.1.1775.5
fig|11428.3.peg.2115	1.00436	98.71	VAFTPDEEIGR			-0.00201745	1232.6	617.308	1232.6	617.309	2	13	6.1.1.1586.6
fig|11428.3.peg.2115	0.886057	98.26	AYYIIR			-0.00153182	797.442	399.728	797.444	399.729	2	8	2.1.1.1695.4
fig|11428.3.peg.2115	0.829738	97.99	DFDRENFEAR		missed R-E@4	-0.000958765	1297.57	649.791	1297.57	649.792	2	10	3.1.1.1655.15
fig|11428.3.peg.2115	0.657577	99	LTFNGTNTHPGTAK	Deamidated(N)@4		0.00129336	1458.71	730.363	1458.71	730.362	2	9	4.1.1.1552.26
fig|11428.3.peg.2115	0.0264104	34.53	FEYVSVDTMEK			-0.00870646	1346.6	674.306	1346.61	674.31	2	10	2.1.1.1798.13
fig|11428.3.peg.2115	0.0145735	22.22	LLVEELK			-0.00313487	842.508	422.261	842.511	422.263	2	6	4.1.1.1740.2
fig|11428.3.peg.1038	2	99	SSMENGSAWLATTGGR	Deamidated(N)@5		-0.00118273	1624.71	813.364	1624.72	813.365	2	20	5.1.1.1875.9
fig|11428.3.peg.1038	2	99	VTINEAGQLITTK			-0.0270698	1386.74	694.38	1386.77	694.393	2	18	3.1.1.1834.13
fig|11428.3.peg.1038	1.85387	99	ITLSGYSQDHKR		missed K-R@11	-0.000621994	1403.72	351.936	1403.72	351.936	4	11	5.1.1.1560.2
fig|11428.3.peg.1038	1.00436	98.71	AIHFYCQK	Carbamidomethyl(C)@6		7.98504e-05	1065.51	356.176	1065.51	356.176	3	10	5.1.1.1620.2
fig|11428.3.peg.1038	0.659556	96.76	NFQTAIHLK			-0.00850034	1070.58	536.297	1070.59	536.301	2	12	6.1.1.1521.14
fig|11428.3.peg.1038	0.0204516	28.86	STYEESLR			0.00957764	983.466	492.74	983.456	492.735	2	7	6.1.1.1395.15
fig|11428.3.peg.4531	2	99	GKKDEADGAATSAMR		missed K-K@2; missed K-D@3	0.00504272	1506.71	503.245	1506.71	503.244	3	12	2.1.1.1375.9
fig|11428.3.peg.4531	2	99	GSVGTTQSLVMR			-0.00154346	1234.63	618.323	1234.63	618.324	2	16	2.1.1.1642.13
fig|11428.3.peg.4531	2	99	VTEAAALSSAR			-0.00370098	1074.56	538.289	1074.57	538.291	2	15	3.1.1.1597.5
fig|11428.3.peg.4531	1.55284	99	HQEIIEEIRK		missed R-K@9	-0.0016416	1293.7	647.859	1293.7	647.859	2	12	1.1.1.1432.25
fig|11428.3.peg.917	2	99	GAFSQQIEQDFGSFLR			-0.00139802	1828.87	915.444	1828.87	915.444	2	18	5.1.1.2993.11
fig|11428.3.peg.917	2	99	NWWNVVNWPDVEK			-0.00179952	1684.8	843.406	1684.8	843.407	2	17	6.1.1.2237.3
fig|11428.3.peg.917	2	99	QEEEEYELYERGDSER	Gln->pyro-Glu@N-term	cleaved M-Q@N-term; missed R-G@11	0.0022186	2042.84	1022.42	2042.83	1022.42	2	17	5.1.1.1841.24
fig|11428.3.peg.917	1.45593	99	SYVEGLNKAEK		missed K-A@8	-0.00277744	1236.63	619.323	1236.64	619.325	2	12	6.1.1.1393.17
fig|11428.3.peg.917	0.0619809	56.1	HFTEAASK			-0.00160671	889.428	445.721	889.429	445.722	2	9	6.1.1.1178.2
fig|11428.3.peg.917	0.0550241	53.14	EIMMLHHDKHHR		missed K-H@9	0.00178289	1582.76	396.698	1582.76	396.698	4	9	5.1.1.1456.3
fig|11428.3.peg.3460	2	99	AAAQAPSAWNLQHWK			0.00357802	1677.84	560.288	1677.84	560.286	3	16	2.1.1.1796.8
fig|11428.3.peg.3460	2	99	FLVFQGEDVQK			-1.88516e-05	1308.67	655.343	1308.67	655.343	2	14	2.1.1.1848.7
fig|11428.3.peg.3460	1.69897	99	FLVFQGEDVQKR		missed K-R@11	-0.0134149	1464.76	489.26	1464.77	489.265	3	14	1.1.1.1624.7
fig|11428.3.peg.3460	1.18709	99	NIESAYAR			0.00377365	922.455	462.235	922.451	462.233	2	10	1.1.1.1411.4
fig|11428.3.peg.3460	0.732828	97.35	EISSTELHEILK			-0.00473429	1397.74	466.919	1397.74	466.921	3	10	4.1.1.1812.2
fig|11428.3.peg.1116	2	99	HALIGAGIDSSHAFER			-0.0038714	1679.83	560.952	1679.84	560.953	3	25	1.1.1.1557.7
fig|11428.3.peg.1116	2	99	VQITESGYIK			-0.00307755	1136.6	569.31	1136.61	569.311	2	13	4.1.1.1672.19
fig|11428.3.peg.1116	1.79588	99	HLVELAK			-0.00207652	808.479	405.247	808.481	405.248	2	8	2.1.1.1478.9
fig|11428.3.peg.1116	1.69897	99	GALILTVK			-0.00237544	813.53	407.772	813.532	407.773	2	10	4.1.1.1742.2
fig|11428.3.peg.1116	0.216811	84.29	ELVSIPSPSGNTAK			-0.00659081	1398.73	700.372	1398.74	700.375	2	12	5.1.1.1793.10
fig|1428.368.peg.4320; fig|11428.3.peg.4220	2	99	FSAVGEGTQDKNLSEIVSR		missed K-N@11	-0.00202627	2036.02	679.679	2036.02	679.68	3	20	2.1.1.1775.17
fig|1428.368.peg.4320; fig|11428.3.peg.4220	2	99	IQNPQTGEELAR			-0.0034864	1354.68	678.348	1354.68	678.349	2	14	6.1.1.1423.20
fig|1428.368.peg.4320; fig|11428.3.peg.4220	1.50864	99	TTLIAGEMYR			-0.00469402	1153.58	577.795	1153.58	577.797	2	13	5.1.1.1802.16
fig|1428.368.peg.4320; fig|11428.3.peg.4220	1.40894	99	YNLSDNYAGK			0.00495347	1143.52	572.77	1143.52	572.767	2	10	4.1.1.1602.18
fig|1428.368.peg.4320; fig|11428.3.peg.4220	0.823909	97.91	FSAVGEGTQDK			0.00718677	1137.54	569.776	1137.53	569.772	2	9	4.1.1.1483.16
fig|11428.3.peg.289	2	99	GDLSHVASANILHHSNLQK			-0.00134978	2040.05	681.024	2040.05	681.024	3	24	1.1.1.1517.18
fig|11428.3.peg.289	2	99	LSVNESEFWLSNGNPIK	Deamidated(N)@12		0.00106739	1933.94	967.979	1933.94	967.978	2	21	1.1.1.2217.6
fig|11428.3.peg.289	2	99	YSPYYNTIIGSADLSSSNEGKR		missed K-R@21	0.00866528	2421.15	808.058	2421.14	808.056	3	22	2.1.1.1858.5
fig|11428.3.peg.289	1.88606	99	YLEEGSYSVK			-0.00111831	1173.55	587.784	1173.56	587.785	2	14	1.1.1.1499.14
fig|1428.368.peg.3996; fig|11428.3.peg.3116	2	99	AAEESKEQIQEALR		missed K-E@6	-0.00292376	1600.8	801.409	1600.81	801.41	2	17	6.1.1.1462.24
fig|1428.368.peg.3996; fig|11428.3.peg.3116	2	99	GSALMGIGSGNGENR	Deamidated(N)@11		0.00627137	1419.65	710.831	1419.64	710.828	2	14	5.1.1.1744.24
fig|1428.368.peg.3996; fig|11428.3.peg.3116	2	99	VIGVGGGGNNAVNR			-0.00109913	1282.67	642.344	1282.67	642.344	2	14	2.1.1.1527.6
fig|1428.368.peg.3996; fig|11428.3.peg.3116	1.95861	99	GLGAGANPEVGKK		missed K-K@12	-0.000488825	1196.65	399.891	1196.65	399.891	3	11	4.1.1.1425.2
fig|1428.368.peg.3996; fig|11428.3.peg.3116	0.0105502	16.79	KAAEESKEQIQEALR		missed K-A@1; missed K-E@7	0.00119758	1728.9	577.308	1728.9	577.307	3	7	6.1.1.1421.14
fig|1428.368.peg.5479; fig|11428.3.peg.3821	2	99	AEETNSDMYAAIDLVVDKIER		missed K-I@18	-0.0206466	2381.12	794.714	2381.14	794.721	3	21	6.1.1.2287.3
fig|1428.368.peg.5479; fig|11428.3.peg.3821	2	99	GENIEVTPALK			-0.00221691	1169.63	585.821	1169.63	585.822	2	15	4.1.1.1674.16
fig|1428.368.peg.5479; fig|11428.3.peg.3821	2	99	GENIEVTPALKEYVEK		missed K-E@11	0.00120852	1817.94	606.988	1817.94	606.988	3	19	5.1.1.1872.6
fig|1428.368.peg.5479; fig|11428.3.peg.3821	2	99	VEVTIPFTDLLLR			-0.00251245	1514.87	758.441	1514.87	758.443	2	20	5.1.1.3140.2
fig|11428.3.peg.3722	2	99	FYEDAATEAEQEK			0.0118658	1529.66	765.839	1529.65	765.833	2	18	6.1.1.1474.7
fig|11428.3.peg.3722	2	99	KTPNHDQATPYTQSEDPAVPVTK		missed K-T@1	0.00426659	2523.23	631.814	2523.22	631.813	4	15	2.1.1.1570.21
fig|11428.3.peg.3722	2	99	MPAAANAEVVVQK			0.00176252	1326.7	664.356	1326.7	664.356	2	17	6.1.1.1495.10
fig|11428.3.peg.3722	2	99	MPAAANAEVVVQKK		missed K-K@13	0.0143579	1454.81	485.943	1454.79	485.938	3	19	6.1.1.1444.9
fig|11428.3.peg.2106	2	99	GKGVTVGITWTGHPHIHR		missed K-G@2	-0.000236175	1952.05	651.69	1952.05	651.69	3	21	1.1.1.1505.16
fig|11428.3.peg.2106	2	99	GVTVGITWTGHPHIHR			-0.00670149	1766.93	884.47	1766.93	884.474	2	21	1.1.1.1551.26
fig|11428.3.peg.2106	2	99	GVTVGITWTGHPHIHRN		missed R-N@16	0.000562814	1880.98	941.495	1880.98	941.495	2	23	1.1.1.1536.12
fig|11428.3.peg.2106	2	99	SSAGFYGWGFGLK		cleaved S-S@N-term	-0.000531242	1375.66	688.835	1375.66	688.835	2	22	1.1.1.2239.3
fig|11428.3.peg.1705	2	99	LQVPVKEEVKPANKPENKK		missed K-E@6; missed K-K@18	0.0102086	2174.25	725.758	2174.24	725.755	3	18	6.1.1.1349.7
fig|11428.3.peg.1705	2	99	NAYEQTETFWGK			0.00260892	1472.66	737.337	1472.66	737.336	2	18	5.1.1.1887.8
fig|11428.3.peg.1705	2	99	NYLEQVNVPTKEDIAR		missed K-E@11	0.00401284	1887.97	944.994	1887.97	944.992	2	18	5.1.1.1825.25
fig|11428.3.peg.1705	2	99	VDQILELLEK			-0.00150964	1198.68	600.347	1198.68	600.348	2	16	6.1.1.2117.2
fig|1428.368.peg.3416; fig|11428.3.peg.4474	2	99	AEAEGEGQQGMLMVGNVGVNR			0.012153	2145.01	716.009	2144.99	716.005	3	16	2.1.1.1829.14
fig|1428.368.peg.3416; fig|11428.3.peg.4474	2	99	AREQDIALAR		missed R-E@2	-0.00848958	1141.61	571.813	1141.62	571.817	2	12	4.1.1.1498.7
fig|1428.368.peg.3416; fig|11428.3.peg.4474	2	99	GVIAYNEEDVK		cleaved M-G@N-term	0.00588002	1235.61	618.812	1235.6	618.809	2	16	6.1.1.1491.20
fig|1428.368.peg.3416; fig|11428.3.peg.4474	2	99	QMVYQNPGGFEATQK			0.00121399	1696.79	849.402	1696.79	849.401	2	17	1.1.1.1569.24
fig|11428.3.peg.598	2	99	KQQIFYEN		missed K-Q@1	0.00247812	1068.53	535.27	1068.52	535.269	2	11	5.1.1.1662.14
fig|11428.3.peg.598	2	99	QAVVGMGINYQGR			-0.00125645	1391.7	696.856	1391.7	696.856	2	18	1.1.1.1594.10
fig|11428.3.peg.598	2	99	VYDNPLGVMTNSPEFNWHLQNLR			0.00761359	2743.33	915.449	2743.32	915.446	3	22	1.1.1.2385.8
fig|11428.3.peg.598	2	99	WNNITGETIETK			0.00316749	1404.69	703.353	1404.69	703.352	2	13	4.1.1.1712.19
fig|11428.3.peg.2517	2	99	DVAPYTIVGGNPANK			-0.00356449	1514.77	758.392	1514.77	758.394	2	17	2.1.1.1757.15
fig|11428.3.peg.2517	2	99	IGDGAIIAAK			-0.0010034	927.538	464.776	927.539	464.777	2	14	2.1.1.1603.7
fig|11428.3.peg.2517	2	99	ITGNIDAIVR			-0.00272903	1070.61	536.31	1070.61	536.311	2	16	5.1.1.1796.6
fig|11428.3.peg.2517	2	99	YPIEGNQNVQFIK			-0.00610361	1548.79	775.401	1548.79	775.404	2	15	3.1.1.1840.19
fig|11428.3.peg.2886	2	99	AGGVGLGGVLVDVGVDTIVEEGKR		missed K-R@23	-0.00252523	2295.24	766.088	2295.24	766.088	3	27	6.1.1.2243.3
fig|11428.3.peg.2886	2	99	KADPFGNLVFDK		missed K-A@1	-0.000807056	1349.7	675.856	1349.7	675.856	2	20	2.1.1.1863.3
fig|11428.3.peg.2886	2	99	LQIEFSPQGTLAER			-0.00177688	1587.82	794.919	1587.83	794.92	2	15	4.1.1.1923.8
fig|11428.3.peg.2886	2	99	SLITSHIGSNPNAGR			0.000257746	1522.79	508.602	1522.79	508.602	3	17	2.1.1.1597.11
fig|11428.3.peg.136	2	99	QMQGISVETEQLLHK			-0.00334907	1739.88	580.969	1739.89	580.97	3	19	5.1.1.1890.5
fig|11428.3.peg.136	2	99	TLENVASTLEGLEK			-0.00435305	1502.78	752.396	1502.78	752.399	2	23	6.1.1.2048.2
fig|11428.3.peg.136	2	99	TNALADDIQQK			0.00193648	1215.61	608.813	1215.61	608.812	2	14	2.1.1.1587.13
fig|11428.3.peg.136	2	99	VVAGVDGIGTTIQSLNTK			0.00345388	1771.97	886.993	1771.97	886.991	2	24	4.1.1.1929.3
fig|11428.3.peg.1954	2	99	AAAYSATEAVELVKK		missed K-K@14	-0.00148995	1549.83	517.619	1549.84	517.619	3	16	2.1.1.1745.7
fig|11428.3.peg.1954	2	99	AKEAEAAGADFVGDTDYIGK		missed K-E@2	0.000934077	2026.95	676.657	2026.95	676.657	3	19	2.1.1.1765.18
fig|11428.3.peg.1954	2	99	NVTVASTMGPGVR			0.00187304	1287.66	644.838	1287.66	644.838	2	15	6.1.1.1495.9
fig|11428.3.peg.1954	2	99	TGTVTFDVTK			-0.00158064	1067.55	534.781	1067.55	534.782	2	12	2.1.1.1660.11
fig|11428.3.peg.1954	0.0168249	23.86	GAVVLPHGTGK			-0.002891	1034.58	518.299	1034.59	518.301	2	6	2.1.1.1487.15
fig|11428.3.peg.303	2	99	ALAYGIAGHELHHMGVIR			-0.00524341	1944.01	487.01	1944.02	487.011	4	15	3.1.1.1800.5
fig|11428.3.peg.303	2	99	EVVGHITDAER			-0.00042774	1224.61	613.312	1224.61	613.312	2	13	3.1.1.1558.7
fig|11428.3.peg.303	2	99	MNQRPSEEEYAGSSGEYIR			0.00927518	2201.97	734.999	2201.96	734.996	3	15	1.1.1.1504.22
fig|11428.3.peg.303	2	99	NQRPSEEEYAGSSGEYIR		cleaved M-N@N-term	-0.00218524	2070.92	691.315	2070.92	691.315	3	16	5.1.1.1666.20
fig|11428.3.peg.303	0.015923	22.85	GLPAEAWNR			0.0111524	1012.52	507.267	1012.51	507.262	2	8	5.1.1.1751.6
fig|11428.3.peg.2237	2	99	GSVIVAAAGNAGNTK			0.00411371	1328.71	443.91	1328.7	443.909	3	17	1.1.1.1455.8
fig|11428.3.peg.2237	2	99	IQAPQAWDSQR			-0.00227784	1298.63	650.324	1298.64	650.326	2	17	1.1.1.1532.16
fig|11428.3.peg.2237	2	99	VAIIDTGVQGSHPDLASK			-0.0021931	1806.95	904.48	1806.95	904.481	2	18	1.1.1.1572.25
fig|11428.3.peg.2237	2	99	VLDNQGSGTLDAVAQGIR			-0.00166553	1812.93	605.318	1812.93	605.318	3	25	2.1.1.1847.8
fig|11428.3.peg.2237	0.0254883	31.81	IQAPQAWDSQRSDPGVK		missed R-S@11	0.0113481	1881.94	628.322	1881.93	628.318	3	11	1.1.1.1519.6
fig|11428.3.peg.2169	2	99	AAGLDPHYADHDSALHYHNAAGVPFTATYIQAK			0.0249994	3521.7	705.347	3521.68	705.342	5	18	4.1.1.1818.13
fig|11428.3.peg.2169	2	99	ATYQWLINLSDDPDINDSLR			-0.000206246	2348.13	783.717	2348.13	783.717	3	19	6.1.1.2246.2
fig|11428.3.peg.2169	2	99	FREAVEILKEER		missed R-E@2; missed K-E@9	-0.00283002	1517.82	759.916	1517.82	759.917	2	16	6.1.1.1527.21
fig|11428.3.peg.2169	2	99	GDPIADLYEDIAAEEK			-0.00178213	1747.81	874.914	1747.82	874.915	2	24	5.1.1.2900.2
fig|11428.3.peg.2169	0.0357404	40	YTIPDK			-0.00282218	735.378	368.696	735.38	368.697	2	6	4.1.1.1534.4
fig|11428.3.peg.4905	2	99	HVWAGAGSLNEK			0.000394402	1267.63	634.823	1267.63	634.823	2	13	2.1.1.1564.24
fig|11428.3.peg.4905	2	99	HVYVDWNDETLTR			0.000101746	1646.77	549.93	1646.77	549.93	3	17	3.1.1.1820.5
fig|11428.3.peg.4905	2	99	IVDYKAEAGEEALK		missed K-A@5	-0.00421532	1534.78	768.399	1534.79	768.401	2	24	1.1.1.1505.24
fig|11428.3.peg.4905	2	99	LKFDLAPEEAFAEFPSWK		missed K-F@2	0.00705492	2124.06	709.029	2124.06	709.026	3	24	1.1.1.2486.2
fig|11428.3.peg.4905	0.0584886	52.81	VFPDVAPEEQEAK			-0.00105379	1457.7	729.859	1457.7	729.859	2	11	1.1.1.1590.21
fig|11428.3.peg.3169	2	99	AYAIYDEETLKDTISNLRGEN		missed K-D@11; missed R-G@18	0.0064227	2414.17	805.73	2414.16	805.727	3	18	6.1.1.2064.6
fig|11428.3.peg.3169	2	99	IAFLFPGQGSQAVGMGK			-0.000116943	1706.88	854.448	1706.88	854.448	2	21	1.1.1.2120.3
fig|11428.3.peg.3169	2	99	QLAENNKEVAK	Gln->pyro-Glu@N-term	missed K-E@7	-0.00148995	1225.63	613.822	1225.63	613.822	2	14	2.1.1.1476.25
fig|11428.3.peg.3169	2	99	VSGPFHSSLMKPAAEK			0.00133879	1684.86	562.628	1684.86	562.628	3	13	2.1.1.1604.15
fig|11428.3.peg.3169	0.0675262	68.89	QGVEVASQR	Gln->pyro-Glu@N-term		0.00164785	955.474	478.744	955.472	478.743	2	8	2.1.1.1536.18
fig|11428.3.peg.543	2	99	HSLYTANDLK			-0.00950431	1160.57	581.294	1160.58	581.299	2	10	2.1.1.1541.21
fig|11428.3.peg.543	2	99	SNIEITEQVVTATK			-0.00162819	1531.81	766.911	1531.81	766.912	2	12	2.1.1.1783.17
fig|11428.3.peg.543	2	99	YITIHETANTAK			-0.00299177	1360.7	681.355	1360.7	681.357	2	19	3.1.1.1575.4
fig|11428.3.peg.543	1.14874	99	GNEFNQFVPK			0.00116883	1178.57	590.294	1178.57	590.293	2	13	5.1.1.1849.5
fig|11428.3.peg.543	0.761954	97.34	GRGDNTFDPNTTITR		missed R-G@2	0.00139265	1663.79	555.605	1663.79	555.604	3	12	6.1.1.1467.14
fig|11428.3.peg.543	0.106793	68.19	AHAAAFINR			-0.00411769	969.51	485.762	969.514	485.764	2	6	4.1.1.1474.14
fig|11428.3.peg.543	0.0409586	43.05	NCPAFMIQR	Carbamidomethyl(C)@2		-0.000124769	1135.53	568.771	1135.53	568.771	2	9	5.1.1.1779.12
fig|11428.3.peg.543	0.0186345	24.99	AEFATLITR			-0.00584859	1020.55	511.284	1020.56	511.287	2	10	4.1.1.1819.5
fig|11428.3.peg.659	2	99	FEEGNYQFKHEIK		missed K-H@9	6.70098e-05	1667.79	834.904	1667.79	834.904	2	17	2.1.1.1600.25
fig|11428.3.peg.659	2	99	VLAFELAK			-0.00210112	889.525	445.77	889.527	445.771	2	13	3.1.1.1871.4
fig|11428.3.peg.659	2	99	YSPWQYLGQTSR		cleaved L-Y@N-term	-0.00483243	1484.7	743.357	1484.7	743.36	2	19	1.1.1.1957.2
fig|11428.3.peg.659	1.14874	99	FEEGNYQFK			7.82404e-05	1160.51	581.264	1160.51	581.264	2	13	2.1.1.1682.16
fig|11428.3.peg.659	0.982967	98.5	QQLITALQS			-0.00110549	1000.55	501.284	1000.56	501.285	2	13	5.1.1.1888.2
fig|11428.3.peg.1153	2	99	AESNILLEELKK		missed K-K@11	-0.00106129	1385.78	462.933	1385.78	462.933	3	16	2.1.1.1831.3
fig|11428.3.peg.1153	2	99	KIEHVIESAASMGSK		missed K-I@1	0.00413474	1585.82	793.916	1585.81	793.914	2	18	3.1.1.1656.23
fig|11428.3.peg.1153	1.52288	99	GILEVYGEER			0.00180261	1163.58	582.799	1163.58	582.798	2	11	2.1.1.1785.12
fig|11428.3.peg.1153	1.31876	99	KGILEVYGEER		missed K-G@1	0.0014917	1291.68	431.567	1291.68	431.566	3	11	5.1.1.1753.6
fig|11428.3.peg.1153	1.30103	99	CTGPLYTTGSDDFHYYTVK	Carbamidomethyl(C)@1		-0.00114893	2223.98	742.333	2223.98	742.333	3	14	4.1.1.1855.8
fig|11428.3.peg.3262	2	99	ASHILVKDEATAK		missed K-D@7	0.00297251	1381.76	461.594	1381.76	461.593	3	13	1.1.1.1316.9
fig|11428.3.peg.3262	2	99	ASHILVKDEATAKK		missed K-D@7; missed K-K@13	0.00240336	1509.85	378.471	1509.85	378.47	4	15	5.1.1.1442.2
fig|11428.3.peg.3262	2	99	TITDKELKENYKPEIK		missed K-E@5; missed K-E@8	0.000126195	1948.05	650.358	1948.05	650.358	3	21	6.1.1.1452.13
fig|11428.3.peg.3262	2	99	VTDIKEPEKSFEQSK		missed K-E@5; missed K-S@9	0.00127938	1763.9	588.972	1763.89	588.972	3	12	2.1.1.1538.18
fig|11428.3.peg.3262	0.127844	72.15	GGDLGYFTAGK			0.00502183	1084.52	543.269	1084.52	543.267	2	11	6.1.1.1594.7
fig|11428.3.peg.3262	0.0204516	26.91	LKKDEVSEPVK		missed K-K@2; missed K-D@3	-7.98156e-05	1270.71	424.578	1270.71	424.578	3	10	2.1.1.1380.4
fig|11428.3.peg.3262	0.015923	80.57	QQGLKEETVKNGVR	Gln->pyro-Glu@N-term; Deamidated(N)@11	missed K-E@5; missed K-N@10	0.00344978	1568.82	523.947	1568.82	523.946	3	10	5.1.1.1584.16
fig|11428.3.peg.5249	2	99	AQLNELLDAAEQGIFQLIDMQK			0.007846	2487.28	830.099	2487.27	830.097	3	24	1.1.1.4294.2
fig|11428.3.peg.5249	2	99	AVVDLEALGER			-0.00255242	1170.62	586.318	1170.62	586.32	2	19	2.1.1.1856.4
fig|11428.3.peg.5249	2	99	EALGDIVSHIE			-0.000471596	1181.59	591.803	1181.59	591.804	2	18	1.1.1.2021.2
fig|11428.3.peg.5249	2	99	GQFVEVQGTGEEATFSR			-0.00520865	1840.85	921.434	1840.86	921.437	2	20	3.1.1.1811.15
fig|11428.3.peg.5249	0.127844	72.09	TMEIQR			-0.00314682	776.382	389.198	776.385	389.2	2	7	6.1.1.1337.2
fig|11428.3.peg.5249	0.0624821	53.73	VICSATIEER	Carbamidomethyl(C)@3		0.0122236	1176.59	589.304	1176.58	589.298	2	9	5.1.1.1629.21
fig|11428.3.peg.2204	2	99	GDYGSQGGSTITQQVIK			-0.000440635	1737.85	869.934	1737.85	869.934	2	13	5.1.1.1754.25
fig|11428.3.peg.2204	2	99	SVVTSGTGTSANVGSLDVAGK			-0.00247258	1905.96	636.328	1905.96	636.329	3	16	4.1.1.1715.22
fig|11428.3.peg.2204	2	99	SYGIATAAQNYYGK			0.000740738	1505.72	753.865	1505.72	753.865	2	16	2.1.1.1763.19
fig|11428.3.peg.2204	1.79588	99	DSSPNTSVPDTTEQPK			-0.00392587	1701.77	851.89	1701.77	851.892	2	11	5.1.1.1579.26
fig|11428.3.peg.2204	0.403403	91.88	IAQLIFK			-0.000650147	831.521	416.768	831.522	416.768	2	9	5.1.1.1851.2
fig|11428.3.peg.2204	0.0555173	99	GHNMAIELDR			1.0044	1155.55	386.192	1154.55	385.857	3	10	4.1.1.1596.4
fig|11428.3.peg.2204	0.0259491	66.03	IYDKNGDLVYEYGK	Deamidated(N)@5	missed K-N@4	0.0136026	1676.81	559.943	1676.79	559.938	3	12	5.1.1.1792.6
fig|11428.3.peg.4234	2	99	FVSESGQLVQIK			-0.00160888	1333.72	445.582	1333.72	445.582	3	20	1.1.1.1613.5
fig|11428.3.peg.4234	2	99	GGQAFLNPQDIEFER			0.000458432	1719.82	860.918	1719.82	860.918	2	24	1.1.1.2018.5
fig|11428.3.peg.4234	2	99	GVVGEGTGWALIPWR			0.00217896	1596.84	799.429	1596.84	799.428	2	24	1.1.1.2410.2
fig|11428.3.peg.4234	2	99	SVSIYAYTSGGSYMGK			-0.00146706	1669.76	835.889	1669.77	835.89	2	23	1.1.1.1760.4
fig|11428.3.peg.4234	0.226214	83.46	GEFYTFK			-0.00136187	890.416	446.215	890.417	446.216	2	11	2.1.1.1743.5
fig|11428.3.peg.4234	0.047692	46.24	HGTVYYG			0.000224185	795.355	398.685	795.355	398.685	2	6	6.1.1.1362.4
fig|11428.3.peg.3165	2	99	EQHTALLDEPTMVPEQPAQSK			0.0130862	2348.14	783.722	2348.13	783.718	3	14	4.1.1.1756.21
fig|11428.3.peg.3165	2	99	SVQSQLSTEDIK			-0.000672638	1333.67	667.843	1333.67	667.844	2	14	4.1.1.1645.21
fig|11428.3.peg.3165	2	99	VHIHAEHPGDAMNYGQK			0.00183837	1902.88	635.301	1902.88	635.3	3	21	6.1.1.1386.20
fig|11428.3.peg.3165	2	99	VIEGGQTMNPSTEDIVK			0.00412863	1816.89	909.453	1816.89	909.451	2	18	1.1.1.1587.19
fig|11428.3.peg.3165	0.276544	86.97	YAVTVAK			-0.000447347	750.427	376.221	750.428	376.221	2	6	4.1.1.1495.2
fig|11428.3.peg.350	2	99	AGAGVNNIPVER			-0.000376727	1195.63	598.823	1195.63	598.823	2	19	2.1.1.1593.7
fig|11428.3.peg.350	1.92082	99	NLEGEEVPQLVESGKK		missed K-K@15	0.00243269	1754.91	585.976	1754.91	585.976	3	12	2.1.1.1730.14
fig|11428.3.peg.350	1.92082	99	VQTLNQIAEK			0.00593754	1142.64	572.325	1142.63	572.322	2	11	2.1.1.1591.20
fig|11428.3.peg.350	1.52288	99	GIVVFNTPGANANAVK			-0.0109332	1570.84	786.425	1570.85	786.431	2	14	2.1.1.1799.18
fig|11428.3.peg.350	0.924453	98.19	NVTATPHLGASTSESEENCAVMAAR	Carbamidomethyl(C)@19		0.00340598	2602.18	868.4	2602.18	868.399	3	11	2.1.1.1695.25
fig|11428.3.peg.181	2	99	AQAGVTLLR			-0.000464415	927.55	464.782	927.55	464.782	2	15	2.1.1.1653.8
fig|11428.3.peg.181	2	99	FLEGIIENDMNSEIEELK			0.00108965	2122.01	708.346	2122.01	708.345	3	25	4.1.1.2533.2
fig|11428.3.peg.181	2	99	FLEGIIENDMNSEIEELKTLLK		missed K-T@18	0.00449915	2577.33	860.117	2577.32	860.116	3	20	3.1.1.3657.2
fig|11428.3.peg.181	2	99	INDVEIAAAVATGLAAGLVTCSQVMGK	Carbamidomethyl(C)@21		0.00652972	2658.38	887.134	2658.37	887.131	3	29	2.1.1.4319.2
fig|11428.3.peg.181	0.352617	97.5	VNGVALPPAPPERPVASIEDIPPGAR	Deamidated(N)@2		0.0026973	2619.4	874.142	2619.4	874.141	3	14	4.1.1.1896.13
fig|11428.3.peg.2761	2	99	IGQAGTQVPNQLLDERDR		missed R-D@16	-0.00413226	2009.03	670.682	2009.03	670.684	3	15	6.1.1.1577.9
fig|11428.3.peg.2761	2	99	IGYGVQTLGVDR			-0.0141611	1276.66	639.339	1276.68	639.346	2	16	6.1.1.1620.6
fig|11428.3.peg.2761	2	99	LAASLVEANHK			-0.00917723	1151.62	576.818	1151.63	576.822	2	12	5.1.1.1585.17
fig|11428.3.peg.2761	2	99	NLDTVEAQTAEDIEAHVNEFNR			0.00403817	2514.17	839.063	2514.16	839.061	3	20	6.1.1.2179.4
fig|11428.3.peg.2761	0.421361	92.29	LAAVTDGDYKEGLSYK		missed K-E@10	0.0024895	1728.86	865.437	1728.86	865.436	2	11	5.1.1.1754.24
fig|11428.3.peg.1476	2	99	ATSLGYYLAEDAGGK			0.00264912	1514.73	758.371	1514.73	758.37	2	15	5.1.1.1932.6
fig|11428.3.peg.1476	2	99	AVLHYAFENLK			-4.64725e-06	1303.69	652.854	1303.69	652.854	2	16	2.1.1.1789.19
fig|11428.3.peg.1476	2	99	FAEGDGFESGIR			-0.0027182	1283.58	642.795	1283.58	642.796	2	17	2.1.1.1729.13
fig|11428.3.peg.1476	2	99	KATSLGYYLAEDAGGK		missed K-A@1	0.00281435	1642.82	548.615	1642.82	548.614	3	14	4.1.1.1764.13
fig|11428.3.peg.1476	0.458421	93.16	KFAEGDGFESGIR		missed K-F@1	0.0029431	1411.68	471.566	1411.67	471.565	3	9	4.1.1.1658.10
fig|11428.3.peg.822	2	99	ADIDALPIQEETSK			-0.00263914	1528.76	765.387	1528.76	765.388	2	16	3.1.1.1824.15
fig|11428.3.peg.822	2	99	GITEAHGGSYTYTYR			-0.00327128	1674.76	838.388	1674.76	838.389	2	14	1.1.1.1488.26
fig|11428.3.peg.822	2	99	NLISEENIVK			-0.000104257	1157.63	579.822	1157.63	579.822	2	14	3.1.1.1793.10
fig|11428.3.peg.822	2	99	YGYDPVINDEYITK			-0.000989973	1688.79	845.403	1688.79	845.404	2	15	5.1.1.1934.12
fig|11428.3.peg.822	0.488117	93.78	LGTGNENIYTCYPHHHPK	Carbamidomethyl(C)@11		0.00692009	2136.99	713.336	2136.98	713.334	3	10	6.1.1.1420.22
fig|11428.3.peg.1064	2	99	ELAIGGTAVGTGINAHPK			-0.00492753	1704.91	853.463	1704.92	853.465	2	22	1.1.1.1576.18
fig|11428.3.peg.1064	2	99	FGEMVSEEISQFTGK			-0.000935416	1687.78	844.895	1687.78	844.895	2	22	6.1.1.2140.3
fig|11428.3.peg.1064	2	99	LSEEKAEAIVEAADEVIAGK		missed K-A@5	-0.000802815	2071.07	691.363	2071.07	691.363	3	27	6.1.1.2174.6
fig|11428.3.peg.1064	1.60206	99	MIAESNTYMK			0.000586979	1186.54	594.276	1186.54	594.275	2	11	5.1.1.1662.18
fig|11428.3.peg.1064	0.645892	96.12	VTAFEHIIK			-0.00142055	1056.6	353.206	1056.6	353.206	3	9	3.1.1.1730.2
fig|11428.3.peg.1064	0.264401	85.83	FHALTSHDEVVYTHGALK			0.0105483	2024.02	507.013	2024.01	507.01	4	12	6.1.1.1514.10
fig|11428.3.peg.833	2	99	AIPIFIFIDKDGNEQAVFGPR		missed K-D@10	-0.000444661	2346.24	783.086	2346.24	783.086	3	17	6.1.1.2245.9
fig|11428.3.peg.833	2	99	ATLPEKEDPTFEEK		missed K-E@6	0.00695982	1632.8	817.405	1632.79	817.401	2	18	5.1.1.1656.26
fig|11428.3.peg.833	2	99	ISEVANIDMR			-0.00184271	1146.57	574.292	1146.57	574.292	2	16	4.1.1.1690.5
fig|11428.3.peg.833	1.72125	99	ATLPEKEDPTFEEKQK		missed K-E@6; missed K-Q@14	0.00135527	1888.94	630.655	1888.94	630.655	3	12	6.1.1.1413.24
fig|11428.3.peg.833	0.607303	95.64	VQELVTSMR			0.00093269	1061.55	531.785	1061.55	531.784	2	9	4.1.1.1636.12
fig|11428.3.peg.833	0.217527	82.41	RISEVANIDMR		missed R-I@1	-0.00062999	1302.67	652.343	1302.67	652.343	2	10	6.1.1.1494.15
fig|11428.3.peg.3230	2	99	ALIEQFDVR			-0.000792204	1089.58	545.798	1089.58	545.798	2	14	4.1.1.1841.2
fig|11428.3.peg.3230	2	99	EVDRNPDLLIAAQPTR		missed R-N@4	0.00446355	1806.96	603.328	1806.96	603.327	3	17	4.1.1.1736.4
fig|11428.3.peg.3230	2	99	ITEEGIGHIPEDR			0.00289443	1464.72	489.248	1464.72	489.248	3	14	5.1.1.1688.8
fig|11428.3.peg.3230	1.82391	99	IQDISVGMQQR			-0.0012508	1273.64	637.829	1273.64	637.83	2	14	6.1.1.1510.4
fig|11428.3.peg.3230	0.430626	92.41	DNIVLQTYYK			0.0116847	1255.66	628.836	1255.64	628.83	2	12	4.1.1.1823.5
fig|11428.3.peg.3230	0.318759	88.61	TPSEQTLAR			-0.000572755	1001.51	501.764	1001.51	501.764	2	7	4.1.1.1455.12
fig|11428.3.peg.3347	2	99	HYYPHGVEYGDDETFPTNVLQK			0.00131015	2608.19	870.403	2608.19	870.403	3	21	2.1.1.1814.14
fig|11428.3.peg.3347	2	99	SEQLLQNVEK			-0.00176838	1186.62	594.316	1186.62	594.317	2	16	2.1.1.1655.19
fig|11428.3.peg.3347	2	99	VQGVAVEGDIGSR			-0.0137688	1285.65	643.832	1285.66	643.839	2	19	1.1.1.1503.18
fig|11428.3.peg.3347	2	99	VTYDYKFEILK		missed K-F@6	-0.000764826	1417.75	473.59	1417.75	473.59	3	15	4.1.1.1864.4
fig|11428.3.peg.3347	0.752027	97.08	LLPPLLGK			-0.00185961	849.567	425.791	849.569	425.792	2	10	5.1.1.1933.2
fig|1428.368.peg.4134; fig|11428.3.peg.3726	2	99	ILEVDEGKR		missed K-R@8	0.000261233	1057.58	353.533	1057.58	353.533	3	10	6.1.1.1366.2
fig|1428.368.peg.4134; fig|11428.3.peg.3726	2	99	LAFFAGIDNCR	Carbamidomethyl(C)@10		-0.000974324	1282.61	642.313	1282.61	642.314	2	18	5.1.1.2077.2
fig|1428.368.peg.4134; fig|11428.3.peg.3726	1.58503	99	MLNIEQIK			-0.000391609	987.542	494.778	987.542	494.778	2	12	4.1.1.1780.7
fig|1428.368.peg.4134; fig|11428.3.peg.3726	1.4437	99	YPFLLVDK			0.000783927	993.554	497.784	993.554	497.784	2	13	6.1.1.1913.2
fig|1428.368.peg.4134; fig|11428.3.peg.3726	1.27572	99	QVRPGDQLR			0.00183458	1067.59	356.869	1067.58	356.868	3	10	4.1.1.1412.3
fig|1428.368.peg.4134; fig|11428.3.peg.3726	0.355561	89.97	LEVEMTR			-7.41406e-05	876.438	439.226	876.438	439.226	2	9	4.1.1.1588.5
fig|1428.368.peg.4134; fig|11428.3.peg.3726	0.118045	68.8	KQVRPGDQLR		missed K-Q@1	-0.000401384	1195.68	399.567	1195.68	399.567	3	8	2.1.1.1364.2
fig|1428.368.peg.4971	2	99	EYAFVPHLTIGQGLSDAEHADVLGR			0.00191615	2694.34	899.121	2694.34	899.121	3	27	6.1.1.2076.6
fig|1428.368.peg.4971	2	99	LGIVIFPSK			-0.000264905	972.601	487.308	972.601	487.308	2	15	6.1.1.1915.2
fig|1428.368.peg.4971	2	99	TPELTFLNEEMHSGLFTQER			0.00868639	2378.13	793.717	2378.12	793.714	3	29	1.1.1.2302.7
fig|1428.368.peg.4971	2	99	VGSFAPVNNVLYFK			-0.00130701	1553.82	777.919	1553.82	777.919	2	23	6.1.1.2039.5
fig|1428.368.peg.4971	0.756962	97.08	MKDFYYEQPIDR		missed K-D@2	0.00299703	1603.74	535.586	1603.73	535.585	3	13	5.1.1.1777.10
fig|1428.368.peg.4971	0.0390538	39.98	DFYYEQPIDR			0.00416176	1344.6	673.309	1344.6	673.307	2	9	5.1.1.1843.13
fig|11428.3.peg.6073	2	99	AEWGSPKPPLVK			-0.0211763	1307.7	654.859	1307.72	654.869	2	16	1.1.1.1542.21
fig|11428.3.peg.6073	2	99	HQNEFLDYPAATK			-0.00369908	1532.72	767.368	1532.73	767.37	2	18	2.1.1.1685.24
fig|11428.3.peg.6073	2	99	LWDVSPEVEK			-0.00203652	1200.6	601.308	1200.6	601.309	2	14	3.1.1.1828.7
fig|11428.3.peg.6073	1.63827	99	VAGDILNYK			-0.0029785	991.531	496.773	991.534	496.774	2	13	2.1.1.1710.11
fig|11428.3.peg.6073	0.752027	97.01	QYVAETIVK			-0.00208715	1049.57	525.794	1049.58	525.795	2	11	4.1.1.1640.8
fig|11428.3.peg.6073	0.416801	91.87	VFALDNR			-0.00123216	833.438	417.726	833.44	417.727	2	8	2.1.1.1637.6
fig|11428.3.peg.6073	0.123205	69.62	APVKKEDMVEK		missed K-K@4; missed K-E@5	-0.00137911	1272.67	425.232	1272.67	425.232	3	8	1.1.1.1248.3
fig|11428.3.peg.5682	2	99	QGNEVTAIDYSEDGLEK			0.00705478	1866.86	934.435	1866.85	934.431	2	23	1.1.1.1634.10
fig|11428.3.peg.5682	2	99	VIHFFNGEQER			0.0213522	1374.69	459.237	1374.67	459.23	3	14	5.1.1.1732.3
fig|11428.3.peg.5682	1.56864	99	VIAFAEGEGR			0.00404073	1047.54	524.777	1047.53	524.775	2	11	4.1.1.1648.14
fig|11428.3.peg.5682	1.48149	99	LAEKHNVNVHTK		missed K-H@4	0.00171458	1388.75	463.925	1388.75	463.925	3	13	2.1.1.1162.2
fig|11428.3.peg.5682	1.37675	99	KQINYSTGGPK		missed K-Q@1	-0.0071668	1191.62	398.213	1191.62	398.216	3	8	5.1.1.1468.2
fig|11428.3.peg.5682	0.390406	97.74	VIHFFNGEQERVEGK	Deamidated(N)@6	missed R-V@11	-0.00831997	1788.87	448.225	1788.88	448.227	4	13	3.1.1.1749.3
fig|11428.3.peg.5682	0.165579	76.37	NAVFLAR			0.00291145	789.453	395.734	789.45	395.732	2	7	4.1.1.1631.5
fig|11428.3.peg.5682	0.00788851	18.22	QINYSTGGPK	Gln->pyro-Glu@N-term		-0.00754059	1046.5	524.255	1046.5	524.259	2	10	5.1.1.1700.8
fig|11428.3.peg.998	2	99	IPVTEGLQPSSEVTEMK			-0.00217767	1843.92	922.968	1843.92	922.969	2	18	5.1.1.1860.19
fig|11428.3.peg.998	2	99	KGTGTSPAVGASFTAPGGTPDAK		missed K-G@1	0.00211647	2074.04	692.352	2074.03	692.352	3	19	2.1.1.1631.7
fig|11428.3.peg.998	2	99	SYGIATAAQK			-0.00257534	1008.52	505.268	1008.52	505.269	2	10	4.1.1.1528.9
fig|11428.3.peg.998	2	99	VVENAFLATEDSR			-0.00565782	1449.7	725.859	1449.71	725.862	2	16	5.1.1.1819.24
fig|11428.3.peg.998	0.939302	98.17	DVVKPGSGGTGPTAYVSGVDVAGK			-0.00152755	2217.13	740.049	2217.13	740.05	3	12	4.1.1.1749.21
fig|11428.3.peg.998	0.104025	88.87	FERPSSVQEINGELYVK	Deamidated(N)@11		-0.00519731	1994.99	666.004	1994.99	666.006	3	13	2.1.1.1786.16
fig|11428.3.peg.998	0.0594835	50.57	NVVLSLMNR			-0.00310435	1044.57	523.293	1044.57	523.295	2	9	4.1.1.1876.3
fig|11428.3.peg.6079	2	99	AVVGMGINHEGR			-0.00431416	1238.61	620.315	1238.62	620.317	2	16	5.1.1.1589.8
fig|11428.3.peg.6079	2	99	KAVVGMGINHEGR		missed K-A@1	-0.00558151	1366.71	456.577	1366.71	456.579	3	16	2.1.1.1457.13
fig|11428.3.peg.6079	2	99	MYDNPLGVMTNSPEFNWHLQNLR			-0.00127857	2775.29	926.104	2775.29	926.104	3	20	6.1.1.2199.7
fig|11428.3.peg.6079	2	99	RYQWNNITGETIR		missed R-Y@1	0.0021547	1649.83	550.95	1649.83	550.95	3	17	5.1.1.1814.2
fig|11428.3.peg.6079	1.22915	99	NFQHLFAR			-0.00289318	1031.53	516.771	1031.53	516.772	2	13	6.1.1.1554.4
fig|11428.3.peg.5245	2	99	AKFDVDIVSIK		missed K-F@2	0.000145251	1233.7	412.24	1233.7	412.24	3	11	4.1.1.1830.3
fig|11428.3.peg.5245	2	99	IVAAVCHGVSSLVGVK	Carbamidomethyl(C)@6		0.00120194	1594.89	532.636	1594.89	532.636	3	15	3.1.1.1821.4
fig|11428.3.peg.5245	2	99	RVPFLLESK		missed R-V@1	0.000268678	1087.64	363.554	1087.64	363.554	3	10	4.1.1.1764.2
fig|11428.3.peg.5245	1.95861	99	ITGYTNDEER			0.00304132	1196.53	599.274	1196.53	599.273	2	9	2.1.1.1462.9
fig|11428.3.peg.5245	1.25181	99	HVASLLQNTR		cleaved R-P@C-term	-0.00787336	1137.62	380.213	1137.63	380.216	3	9	4.1.1.1532.3
fig|11428.3.peg.5245	0.0362122	37.62	RITGYTNDEER		missed R-I@1	-9.96131e-05	1352.63	451.885	1352.63	451.885	3	7	2.1.1.1433.6
fig|11428.3.peg.5245	0.00966115	39.2	VSIPNGIPR	Deamidated(N)@5		-0.00348698	952.531	477.273	952.534	477.274	2	8	2.1.1.1702.4
fig|1428.368.peg.4921	2	99	SLAALYVACGIDPEK	Carbamidomethyl(C)@9		0.001394	1605.81	803.912	1605.81	803.911	2	21	4.1.1.1974.8
fig|1428.368.peg.4921	2	99	SMISMLDEPK			-0.000555599	1149.54	575.778	1149.54	575.778	2	15	5.1.1.1912.4
fig|1428.368.peg.4921	2	99	TVEEIEAMYEGK			-0.00209911	1397.64	699.825	1397.64	699.826	2	18	2.1.1.1852.5
fig|1428.368.peg.4921	1.88606	99	KVENAMGLSR		missed K-V@1	0.00191465	1103.58	368.866	1103.58	368.866	3	9	3.1.1.1539.3
fig|1428.368.peg.4921	1.25181	99	SAVTDSEGIVK			-0.00187076	1104.56	553.289	1104.57	553.29	2	11	4.1.1.1569.18
fig|1428.368.peg.4921	0.129011	70.42	VMSLTEPTKK		missed K-K@9	-0.000920877	1132.62	567.315	1132.62	567.315	2	9	3.1.1.1567.6
fig|11428.3.peg.3384	2	99	ENPFAAPDDSKPLER			0.000673341	1684.81	843.41	1684.81	843.41	2	13	3.1.1.1727.24
fig|11428.3.peg.3384	2	99	NVAEEVSLPASEEDTTTLK			-0.0071432	2031.98	1017	2031.98	1017	2	17	2.1.1.1802.26
fig|11428.3.peg.3384	2	99	TYLQGGEGCLSVDR	Carbamidomethyl(C)@9		0.0131376	1553.73	777.871	1553.71	777.865	2	20	1.1.1.1581.12
fig|11428.3.peg.3384	2	99	YSLRPGIGLAAPQIGVSK			0.00138057	1826.04	609.688	1826.04	609.688	3	24	4.1.1.1864.10
fig|11428.3.peg.3384	1.01773	98.47	IISHSVER			-0.00158727	939.512	470.763	939.514	470.764	2	8	6.1.1.1253.4
fig|11428.3.peg.3384	0.335358	97.13	ATSINGEEVKLR	Deamidated(N)@5	missed K-L@10	-0.00427887	1316.69	439.904	1316.69	439.905	3	13	3.1.1.1644.8
fig|11428.3.peg.3384	0.0181814	22.84	TYLQGGEGCLSVDREVPGYVPR	Carbamidomethyl(C)@9	missed R-E@14	0.00827993	2451.19	818.072	2451.19	818.069	3	10	4.1.1.1853.17
fig|11428.3.peg.3243	2	99	LEEISESYEGVEK			-0.00283223	1510.7	756.358	1510.7	756.359	2	16	4.1.1.1693.21
fig|11428.3.peg.3243	2	99	RIENELDYPGHIK		missed R-I@1	-0.00145276	1582.81	528.61	1582.81	528.611	3	16	6.1.1.1486.6
fig|11428.3.peg.3243	2	99	SFAIQAGR			-0.0011143	848.449	425.232	848.45	425.233	2	11	5.1.1.1648.3
fig|11428.3.peg.3243	1.46852	99	EALLEAKDEIHTLR		missed K-D@7	0.00321603	1636.88	546.635	1636.88	546.633	3	14	5.1.1.1770.7
fig|11428.3.peg.3243	1.03621	98.53	TEAELEIRDR		missed R-D@8	0.00377726	1230.62	411.215	1230.62	411.214	3	11	5.1.1.1607.3
fig|11428.3.peg.3243	0.356547	89.64	QQQIEELESK			-0.00202699	1230.61	616.311	1230.61	616.312	2	10	4.1.1.1589.21
fig|11428.3.peg.3243	0.225483	82.22	ILVKPDTIDDLEAHR			0.00302108	1733.93	434.491	1733.93	434.49	4	11	4.1.1.1757.3
fig|11428.3.peg.3243	0.115771	67.48	KRIENELDYPGHIK		missed K-R@1; missed R-I@2	-0.0090055	1710.9	428.731	1710.91	428.734	4	10	6.1.1.1436.5
fig|11428.3.peg.3243	0.113509	67.02	ILDEANRDAEALKK		missed R-D@7; missed K-K@13	-0.00497039	1584.84	793.428	1584.85	793.431	2	10	6.1.1.1433.24
fig|11428.3.peg.3243	0.100727	64	SETLENYIR			0.000407195	1123.55	562.783	1123.55	562.783	2	9	4.1.1.1763.6
fig|1428.368.peg.3374	2	99	LRDHLTDKGAAVTSK		missed R-D@2; missed K-G@8	-0.00148064	1610.87	403.725	1610.87	403.726	4	10	3.1.1.1475.5
fig|1428.368.peg.3374	2	99	MLSPMDLILK			-0.00263437	1159.63	580.823	1159.63	580.825	2	15	6.1.1.2212.2
fig|1428.368.peg.3374	2	99	VQTLDVTEILER			0.00257975	1414.77	708.392	1414.77	708.391	2	15	6.1.1.2038.5
fig|1428.368.peg.3374	2	99	YNEVYEAPR			0.00226107	1139.53	570.771	1139.52	570.77	2	12	2.1.1.1565.19
fig|1428.368.peg.3374	1.18709	98.98	HAHLIAGPANVFFGR			-0.00373422	1605.85	536.29	1605.85	536.292	3	12	4.1.1.1857.5
fig|1428.368.peg.3374	0.347754	89.28	YLVLTEGK			-0.00975327	921.507	461.761	921.517	461.766	2	9	5.1.1.1729.8
fig|1428.368.peg.3374	0.0447935	42.44	IAISFAK			-0.00158041	748.447	375.231	748.448	375.231	2	7	5.1.1.1775.3
fig|11428.3.peg.1855	2	99	FGYHVTPVQDR			0.00901778	1317.66	440.226	1317.65	440.223	3	13	4.1.1.1609.5
fig|11428.3.peg.1855	2	99	GFGGAVLLSTQPQK			-0.00171988	1401.76	701.887	1401.76	701.888	2	12	4.1.1.1817.15
fig|11428.3.peg.1855	2	99	GQMGVGTVHHIAWR			0.00376265	1547.78	516.934	1547.78	516.933	3	15	6.1.1.1506.4
fig|11428.3.peg.1855	2	99	SSADIGNIIDLK			0.000242369	1244.66	623.338	1244.66	623.338	2	17	4.1.1.1923.6
fig|11428.3.peg.1855	1.58503	99	IGEEGEFVR			0.000397957	1034.5	518.259	1034.5	518.259	2	12	5.1.1.1691.9
fig|11428.3.peg.1740	2	99	EALEVAETIR			-0.000333449	1129.6	565.806	1129.6	565.806	2	12	2.1.1.1725.14
fig|11428.3.peg.1740	2	99	GEGAINDNMATGR			-0.000357844	1304.58	653.296	1304.58	653.296	2	16	2.1.1.1533.22
fig|11428.3.peg.1740	2	99	VFTSAVESGGQVK			-0.00404596	1307.67	654.841	1307.67	654.843	2	16	2.1.1.1598.18
fig|11428.3.peg.1740	2	99	VTVEAVGQTVQLK			-0.00130514	1370.78	686.395	1370.78	686.396	2	18	2.1.1.1780.13
fig|11428.3.peg.1740	0.821023	97.43	GVEVSAPFPR			0.00362292	1057.56	529.787	1057.56	529.785	2	12	3.1.1.1772.7
fig|11428.3.peg.1740	0.779892	97.13	IEVQATK			-0.00168982	787.442	394.728	787.444	394.729	2	7	1.1.1.1292.3
fig|11428.3.peg.5182	2	99	AVLLANHGLIAGANNIK			-0.000825995	1687.97	563.665	1687.97	563.665	3	20	3.1.1.1814.11
fig|11428.3.peg.5182	2	99	EREEIVAYGKK		missed R-E@2; missed K-K@10	0.00433738	1320.71	441.243	1320.7	441.242	3	9	3.1.1.1507.9
fig|11428.3.peg.5182	2	99	GTGGNISIFNR			0.000136433	1134.58	568.296	1134.58	568.296	2	15	6.1.1.1594.9
fig|11428.3.peg.5182	2	99	KREDINALVHTHSPYAK		missed K-R@1; missed R-E@2	-0.000509951	1978.04	495.517	1978.04	495.517	4	20	6.1.1.1455.12
fig|11428.3.peg.5182	0.931814	98.06	LLPEDEMENLAK			0.00333633	1400.69	701.352	1400.69	701.35	2	13	5.1.1.1933.10
fig|11428.3.peg.5182	0.705534	96.48	EREEIVAYGK		missed R-E@2	0.00373448	1192.61	398.545	1192.61	398.544	3	8	4.1.1.1515.4
fig|11428.3.peg.2012	2	99	DAQSMASAYNR			-0.000474368	1212.52	607.267	1212.52	607.267	2	14	2.1.1.1563.16
fig|11428.3.peg.2012	2	99	DMFSTLISLFK			0.0012895	1300.68	651.345	1300.67	651.344	2	17	1.1.1.3933.2
fig|11428.3.peg.2012	2	99	DMFSTLISLFKENEK		missed K-E@11	-0.00556548	1800.89	601.304	1800.9	601.306	3	17	3.1.1.3528.2
fig|11428.3.peg.2012	2	99	VYIHQDTYLINR			-0.00447809	1533.79	767.902	1533.79	767.904	2	14	2.1.1.1702.19
fig|11428.3.peg.2012	1.74473	99	VFVEHYKDILSPS		missed K-D@7	0.00360969	1532.79	767.403	1532.79	767.401	2	14	2.1.1.1809.17
fig|11428.3.peg.2776	2	99	EQGANIPFDGGSIK			-0.00118443	1431.7	716.856	1431.7	716.857	2	15	1.1.1.1623.12
fig|11428.3.peg.2776	2	99	ETEFKDVPGAGGNMTFDAVGNPNPK		missed K-D@5	0.000446296	2591.2	864.74	2591.2	864.739	3	22	2.1.1.1834.8
fig|11428.3.peg.2776	2	99	TLSVTDVDGR			-0.000943356	1061.53	531.774	1061.54	531.775	2	13	6.1.1.1491.15
fig|11428.3.peg.2776	2	99	VSDEVLNEVVNLIR			0.00045175	1597.87	799.941	1597.87	799.941	2	25	6.1.1.2343.2
fig|11428.3.peg.2776	1.3279	99	QTSEHNYTYK	Gln->pyro-Glu@N-term		-0.00176829	1252.53	627.274	1252.54	627.275	2	9	2.1.1.1481.17
fig|11428.3.peg.2776	0.244888	83.47	LDLSHLTNHPTDK			0.00507683	1489.76	373.447	1489.75	373.445	4	12	5.1.1.1704.3
fig|11428.3.peg.2776	0.188425	78.37	GNIPTGEK			0.00104513	814.419	408.217	814.418	408.217	2	6	6.1.1.1261.4
fig|11428.3.peg.5674	2	99	AAAEAVER			-0.000978668	815.413	408.714	815.414	408.714	2	11	6.1.1.1217.3
fig|11428.3.peg.5674	2	99	GCDLNGMMVELFGK	Carbamidomethyl(C)@2		-0.00046871	1569.7	785.856	1569.7	785.857	2	21	6.1.1.2247.3
fig|11428.3.peg.5674	2	99	NYGHFEGEAQTYK			0.00150397	1542.68	772.345	1542.67	772.344	2	16	5.1.1.1633.24
fig|11428.3.peg.5674	2	99	TSEEKEEHLNEKDAIVNFR		missed K-E@5; missed K-D@12	0.00238787	2287.11	572.785	2287.11	572.784	4	23	6.1.1.1491.17
fig|11428.3.peg.5674	1.92082	99	AYNIPGVQVDGK			-0.000866529	1259.65	630.832	1259.65	630.833	2	14	5.1.1.1815.6
fig|11428.3.peg.5674	0.0570004	48.27	AVDDAVQR			0.000939567	872.436	437.225	872.435	437.225	2	6	6.1.1.1267.6
fig|1428.368.peg.6120	2	99	GAGLGSGFTDEEYVQAGAK			-0.00452202	1855.85	928.934	1855.86	928.937	2	22	2.1.1.1803.25
fig|1428.368.peg.6120	2	99	IGIPTEIK			7.99752e-05	869.522	435.768	869.522	435.768	2	12	4.1.1.1723.2
fig|1428.368.peg.6120	2	99	IGIPTEIKNNENR		missed K-N@8	0.000132226	1496.79	749.405	1496.79	749.405	2	20	5.1.1.1695.5
fig|1428.368.peg.6120	2	99	MSAQIGAQFLEK	Dehydrated(S)@2		-0.000647894	1303.66	652.837	1303.66	652.837	2	19	3.1.1.1856.6
fig|1428.368.peg.6120	2	99	VAMTPAGAVHLVQNGHEVFVQK	Oxidation(M)@3; Deamidated(N)@14		-0.0113323	2348.18	588.053	2348.19	588.056	4	19	3.1.1.1800.15
fig|1428.368.peg.3552; fig|11428.3.peg.2887	2	99	IVSECTLPLTSK	Carbamidomethyl(C)@5		0.000985574	1346.71	674.364	1346.71	674.363	2	14	4.1.1.1713.21
fig|1428.368.peg.3552; fig|11428.3.peg.2887	2	99	IVSECTLPLTSKK	Carbamidomethyl(C)@5	missed K-K@12	-0.00187451	1474.8	492.609	1474.81	492.609	3	16	1.1.1.1508.10
fig|1428.368.peg.3552; fig|11428.3.peg.2887	2	99	RVVVVMNHVDKYGNAK		missed R-V@1; missed K-Y@11	0.00217416	1827.98	458.002	1827.98	458.002	4	13	3.1.1.1580.11
fig|1428.368.peg.3552; fig|11428.3.peg.2887	2	99	VPGIGGAMDLAQK			0.00133112	1255.66	628.838	1255.66	628.837	2	23	1.1.1.1661.3
fig|1428.368.peg.3552; fig|11428.3.peg.2887	2	99	VVVVMNHVDKYGNAK		missed K-Y@10	7.42685e-05	1671.88	836.946	1671.88	836.946	2	16	6.1.1.1437.23
fig|1428.368.peg.2804; fig|11428.3.peg.3477	2	99	AISSSMITYTKPGSGLIVR			0.00214012	1980.07	661.032	1980.07	661.031	3	18	5.1.1.1911.12
fig|1428.368.peg.2804; fig|11428.3.peg.3477	2	99	DAEIQITAPFK			-6.19815e-05	1231.64	616.83	1231.64	616.83	2	17	4.1.1.1895.5
fig|1428.368.peg.2804; fig|11428.3.peg.3477	2	99	VANEEMVQTAQLGDK			0.00779849	1631.79	816.902	1631.78	816.898	2	16	6.1.1.1522.21
fig|1428.368.peg.2804; fig|11428.3.peg.3477	2	99	VANEEMVQTAQLGDKIGEEK		missed K-I@15	-0.0019604	2188.07	730.363	2188.07	730.363	3	15	2.1.1.1755.20
fig|1428.368.peg.2804; fig|11428.3.peg.3477	2	99	VSGTAALTGLMK			0.00166496	1147.63	574.822	1147.63	574.821	2	18	2.1.1.1830.9
fig|11428.3.peg.4219	2	99	GANGAVEHLGDNR	Deamidated(N)@3		-0.00207446	1309.6	655.807	1309.6	655.808	2	13	5.1.1.1543.23
fig|11428.3.peg.4219	2	99	ILDEEKNAELIR		missed K-N@6	-0.00203029	1441.78	721.895	1441.78	721.896	2	15	1.1.1.1539.17
fig|11428.3.peg.4219	2	99	SQNFGQVSNSFVR			-0.00283983	1468.7	735.359	1468.71	735.36	2	15	2.1.1.1758.14
fig|11428.3.peg.4219	2	99	TGEGEGDDEAIKVDLK		missed K-V@12	-0.000971381	1674.79	838.404	1674.79	838.405	2	18	1.1.1.1528.23
fig|11428.3.peg.4219	2	99	VSGAEDFVFYNNPK			-0.00437598	1585.74	793.876	1585.74	793.878	2	21	2.1.1.1863.4
fig|11428.3.peg.1860	2	99	AYHEYAIEHGVTVYTMK			0.00448101	2010.96	503.746	2010.95	503.745	4	25	1.1.1.1596.4
fig|11428.3.peg.1860	2	99	NLDDGGPSNGTPFR	Deamidated(N)@9		0.0040823	1446.64	724.328	1446.64	724.326	2	16	3.1.1.1729.20
fig|11428.3.peg.1860	2	99	PSISHSGASFAPK		cleaved K-P@N-term	0.00138548	1284.65	429.223	1284.65	429.223	3	15	5.1.1.1591.4
fig|11428.3.peg.1860	2	99	SLLENDVIAGK			0.00155547	1157.63	579.823	1157.63	579.822	2	16	6.1.1.1615.10
fig|11428.3.peg.1860	2	99	VGIIQFDAHHDLR			0.00011314	1519.79	507.604	1519.79	507.604	3	18	1.1.1.1607.9
fig|11428.3.peg.1860	0.0132283	16.73	FIDREVTK		missed R-E@4	-0.00269551	1006.54	504.278	1006.54	504.28	2	6	2.1.1.1450.11
fig|11428.3.peg.4048	2	99	GITEEKLDMLR		missed K-L@6	-0.00301165	1303.68	652.846	1303.68	652.848	2	14	2.1.1.1740.21
fig|11428.3.peg.4048	2	99	LVELLPK			-0.00283792	810.519	406.267	810.521	406.268	2	10	3.1.1.1797.2
fig|11428.3.peg.4048	2	99	SLEEILQYNEK			-0.00132239	1364.68	683.348	1364.68	683.348	2	14	4.1.1.1914.8
fig|11428.3.peg.4048	2	99	VAGAVISHPFGSIMR			0.00186219	1540.82	514.614	1540.82	514.613	3	14	2.1.1.1810.6
fig|11428.3.peg.4048	2	99	YSGIDLEQFLR			-9.59062e-05	1339.68	670.846	1339.68	670.846	2	19	1.1.1.2367.2
fig|11428.3.peg.4048	0.179142	76.75	KYEEFVAGKFPNKK		missed K-Y@1; missed K-F@9; missed K-K@13	-0.00335256	1683.89	421.981	1683.9	421.982	4	9	6.1.1.1455.5
fig|11428.3.peg.1992	2	99	ALQAAGLEVTAIR			-0.000741095	1311.75	656.882	1311.75	656.883	2	20	2.1.1.1834.4
fig|11428.3.peg.1992	2	99	KNIEAGIAHIR		missed K-N@1	-0.000210057	1220.7	407.907	1220.7	407.907	3	11	2.1.1.1533.6
fig|11428.3.peg.1992	2	99	KSTPFAAQMAAETAAK		missed K-S@1	-0.00178131	1621.81	811.913	1621.81	811.914	2	21	1.1.1.1548.21
fig|11428.3.peg.1992	2	99	NIEAGIAHIR			-0.00173908	1092.6	547.308	1092.6	547.309	2	16	2.1.1.1632.6
fig|11428.3.peg.1992	2	99	STPFAAQMAAETAAK			0.00245118	1493.72	747.868	1493.72	747.867	2	23	1.1.1.1644.8
fig|11428.3.peg.1992	0.184422	77.31	AAMEHGLK			0.000667485	855.428	428.721	855.427	428.721	2	7	1.1.1.1258.6
fig|11428.3.peg.1992	0.0893756	86.24	DVTPVPHNGCRPPK	Deamidated(N)@8; Carbamidomethyl(C)@10		0.00559156	1573.77	525.598	1573.77	525.596	3	9	1.1.1.1365.8
fig|11428.3.peg.5522	2	99	IYEELQGEMK			-0.00101868	1238.58	620.299	1238.59	620.3	2	14	5.1.1.1751.14
fig|11428.3.peg.5522	2	99	KYYLDSLQLQK		missed K-Y@1	-0.00269928	1397.75	466.925	1397.76	466.926	3	16	5.1.1.1835.5
fig|11428.3.peg.5522	2	99	LEELEEAR			0.000820913	987.488	494.751	987.487	494.751	2	9	2.1.1.1551.16
fig|11428.3.peg.5522	1.69897	99	YKYFEEAKDYK		missed K-Y@2; missed K-D@8	0.0241724	1482.73	742.371	1482.7	742.359	2	12	6.1.1.1461.21
fig|11428.3.peg.5522	1.49485	99	GLLCCLQYR	Carbamidomethyl(C)@4; Carbamidomethyl(C)@5		-0.00107747	1181.57	591.791	1181.57	591.792	2	11	4.1.1.1846.10
fig|11428.3.peg.5522	1.05061	98.5	TLIDKGIDAAK		missed K-G@5	-0.014178	1143.64	572.825	1143.65	572.832	2	12	6.1.1.1473.15
fig|11428.3.peg.5522	0.129011	68.92	YFEEAKDYK		missed K-D@6	-0.000111156	1191.54	398.189	1191.54	398.189	3	7	6.1.1.1415.6
fig|11428.3.peg.615	2	99	DSLIEVVQK			-0.00244897	1029.57	515.791	1029.57	515.793	2	14	5.1.1.1825.11
fig|11428.3.peg.615	2	99	HLSLFFK			-0.00136392	890.5	446.257	890.501	446.258	2	11	5.1.1.1869.4
fig|11428.3.peg.615	2	99	IVVINTASTEEK			-0.00368723	1302.7	652.357	1302.7	652.359	2	14	2.1.1.1614.22
fig|11428.3.peg.615	2	99	IVVINTASTEEKTK		missed K-T@12	0.00117284	1531.85	766.931	1531.85	766.93	2	12	6.1.1.1433.23
fig|11428.3.peg.615	2	99	YGIIQESILK			-0.00197924	1162.66	582.336	1162.66	582.337	2	15	4.1.1.1889.3
fig|11428.3.peg.615	0.174574	75.97	IDYFPVR			-0.00380162	908.472	455.243	908.476	455.245	2	10	3.1.1.1833.2
fig|11428.3.peg.615	0.128427	68.66	ILGYSNFDHK			0.00162517	1192.59	597.302	1192.59	597.301	2	9	2.1.1.1675.17
fig|11428.3.peg.615	0.0979971	61.79	IDYFPVRGDR		missed R-G@7	-0.00422166	1236.62	413.214	1236.63	413.216	3	9	1.1.1.1566.4
fig|11428.3.peg.4279	2	99	GHGGYVGDDQIPR			0.00354349	1369.64	457.554	1369.64	457.553	3	16	1.1.1.1441.12
fig|11428.3.peg.4279	2	99	ISINRPEVHNAFRPK			0.00202893	1776.98	445.252	1776.97	445.251	4	15	6.1.1.1459.7
fig|11428.3.peg.4279	2	99	LNVLDLQR			0.000735316	969.561	485.788	969.561	485.788	2	12	4.1.1.1819.4
fig|11428.3.peg.4279	2	99	TVMELIDAFAQAR			-0.00167676	1463.74	732.879	1463.74	732.879	2	22	1.1.1.2741.2
fig|11428.3.peg.4279	2	99	VGSFDGGYGAGYLAR			0.00111062	1488.7	745.358	1488.7	745.357	2	25	2.1.1.1813.18
fig|11428.3.peg.4279	0.403403	93.13	AIEWIK		cleaved M-A@N-term	-0.000448664	758.432	380.223	758.433	380.224	2	9	2.1.1.1751.2
fig|11428.3.peg.981	2	99	GANVDGIHIHSVR			0.00190177	1373.72	687.866	1373.72	687.865	2	17	1.1.1.1448.17
fig|11428.3.peg.981	2	99	MGHEAVLLMER			0.000436106	1284.63	429.218	1284.63	429.218	3	16	1.1.1.1582.2
fig|11428.3.peg.981	2	99	QHVTLAVER	Gln->pyro-Glu@N-term		-0.000834248	1034.55	518.282	1034.55	518.283	2	13	5.1.1.1705.13
fig|11428.3.peg.981	2	99	QQGHPNEVEQLAGAR	Gln->pyro-Glu@N-term		-0.0031119	1615.77	808.891	1615.77	808.892	2	20	1.1.1.1569.23
fig|11428.3.peg.981	2	99	SVIGTTGFTEEELAR			-0.00592197	1608.79	805.404	1608.8	805.407	2	20	2.1.1.1849.11
fig|11428.3.peg.981	0.159894	89.66	TEHFNLVAAVDYK			-0.0285274	1505.72	502.915	1505.75	502.924	3	13	2.1.1.1831.5
fig|11428.3.peg.981	0.125518	67.89	LDAPSGTAVK			-0.00183936	957.511	479.763	957.513	479.764	2	6	4.1.1.1486.7
fig|11428.3.peg.981	0.0872467	58.43	VIIAGPR			-0.00219584	724.457	363.236	724.46	363.237	2	6	6.1.1.1417.3
fig|11428.3.peg.981	0.0496351	43.39	TVELIR			0.00110856	729.44	365.727	729.438	365.727	2	6	2.1.1.1596.2
fig|11428.3.peg.2711	2	99	AGADIIAPSNMMDGFVTAIR			-0.00258184	2049	1025.51	2049	1025.51	2	19	6.1.1.2239.10
fig|11428.3.peg.2711	2	99	AGADLIITYHAK			-0.00262635	1271.68	636.85	1271.69	636.851	2	18	6.1.1.1551.19
fig|11428.3.peg.2711	2	99	DAAHGAPQFGDRK		missed R-K@12	0.00111374	1368.65	457.226	1368.65	457.225	3	14	6.1.1.1315.4
fig|11428.3.peg.2711	2	99	HALDENGFGHVPVMSYAVK	Deamidated(N)@6		0.00388172	2070.99	518.754	2070.98	518.753	4	21	4.1.1.1860.4
fig|11428.3.peg.2711	2	99	SVIVFGLPAEKDEVGSSAYCDHGIVQR	Carbamidomethyl(C)@20	missed K-D@11	0.0121583	2932.45	734.12	2932.44	734.117	4	22	4.1.1.1907.4
fig|11428.3.peg.2711	0.310691	86.9	YSSAFYGPFR			0.000988759	1193.55	597.783	1193.55	597.783	2	11	5.1.1.1920.5
fig|11428.3.peg.2711	0.102923	62.85	MNSLQFNR			0.0185043	1008.5	505.257	1008.48	505.248	2	8	2.1.1.1632.3
fig|11428.3.peg.3929	2	99	ATNTTENETVVAACAK	Carbamidomethyl(C)@14	cleaved A-A@N-term	-0.00164787	1678.78	840.398	1678.78	840.399	2	16	2.1.1.1535.26
fig|11428.3.peg.3929	2	99	GMTGYVSHTTLYNVCS	Carbamidomethyl(C)@15		0.00155543	1788.78	895.399	1788.78	895.398	2	16	3.1.1.1848.9
fig|11428.3.peg.3929	2	99	NTTENETVVAACAK	Carbamidomethyl(C)@12	cleaved T-N@N-term	-0.00417588	1506.69	754.354	1506.7	754.357	2	16	5.1.1.1582.25
fig|11428.3.peg.3929	2	99	SGYTVDSPVLHTFNDGTK			0.00310045	1936.92	646.647	1936.92	646.646	3	22	1.1.1.1661.4
fig|11428.3.peg.3929	2	99	TNTTENETVVAACAK	Carbamidomethyl(C)@13	cleaved A-T@N-term	0.0021388	1607.75	804.881	1607.75	804.88	2	14	1.1.1.1417.24
fig|11428.3.peg.3929	0.430626	91.41	GGTVGVYGAK			-0.00329537	907.473	454.744	907.476	454.745	2	7	1.1.1.1365.4
fig|11428.3.peg.3248	2	99	GFSLINVFSPCVTYNK	Carbamidomethyl(C)@11		-0.00984988	1844.9	923.459	1844.91	923.464	2	19	6.1.1.2234.7
fig|11428.3.peg.3248	2	99	ISGYINSYGVHSIHGR			-0.00136691	1758.88	587.3	1758.88	587.301	3	18	1.1.1.1515.10
fig|11428.3.peg.3248	2	99	LSTVEGYDPSNR			0.0023113	1336.63	669.321	1336.63	669.32	2	15	2.1.1.1600.21
fig|11428.3.peg.3248	2	99	MFDELVAEFM			-0.000401374	1230.53	616.272	1230.53	616.272	2	15	6.1.1.2736.2
fig|11428.3.peg.3248	2	99	NSVKPNWCPGCGDFSVQAAIQR	Carbamidomethyl(C)@8; Carbamidomethyl(C)@11		0.00797152	2490.16	831.061	2490.15	831.058	3	20	4.1.1.1874.10
fig|11428.3.peg.3248	0.341989	88.17	ALPIAQGVK			-0.00159729	895.547	448.781	895.549	448.782	2	8	2.1.1.1621.7
fig|11428.3.peg.3248	0.069051	51.77	GYSEEPLVK			0.000271861	1020.51	511.264	1020.51	511.264	2	9	4.1.1.1590.14
fig|11428.3.peg.3248	0.0315171	31.96	QPSYQELVK			0.000364795	1090.57	546.29	1090.57	546.29	2	10	2.1.1.1663.15
fig|11428.3.peg.3399	2	99	LAGYHESQELLTEIKR		missed K-R@15	0.00428343	1885.99	472.506	1885.99	472.505	4	15	2.1.1.1786.5
fig|11428.3.peg.3399	2	99	SGEYLLPAK			-0.000417414	976.523	489.269	976.523	489.269	2	13	6.1.1.1521.9
fig|11428.3.peg.3399	2	99	SGQYQIVTLK			0.00121009	1135.63	568.82	1135.62	568.819	2	15	2.1.1.1725.15
fig|11428.3.peg.3399	2	99	SGQYQIVTLKR		missed K-R@10	-0.00206055	1291.72	431.582	1291.72	431.582	3	15	3.1.1.1681.6
fig|11428.3.peg.3399	1.5376	99	MSYDEEHKNLYVYER		missed K-N@8	0.00874001	1974.89	659.303	1974.88	659.3	3	14	1.1.1.1524.12
fig|11428.3.peg.3399	0.844664	97.38	GYETQFSIR			0.00296191	1099.53	550.774	1099.53	550.772	2	12	4.1.1.1732.7
fig|11428.3.peg.3399	0.105684	63.18	HLPMNK			-6.38163e-05	738.385	370.2	738.385	370.2	2	6	1.1.1.1254.3
fig|11428.3.peg.4956	2	99	AAAENMIPTSTGAAK			-0.000404865	1431.7	716.859	1431.7	716.859	2	19	1.1.1.1501.24
fig|11428.3.peg.4956	2	99	AVALVLPELK			-0.00222556	1051.66	526.838	1051.66	526.839	2	17	1.1.1.2026.3
fig|11428.3.peg.4956	2	99	VLSWYDNETGYSNR			0.0019759	1702.76	852.388	1702.76	852.387	2	15	2.1.1.1815.17
fig|11428.3.peg.4956	2	99	VPTANVSLVDLVVELDKEVTVEEVNAAFK		missed K-E@17	0.00225558	3126.67	1043.23	3126.67	1043.23	3	26	1.1.1.3626.4
fig|11428.3.peg.4956	2	99	VVDLAAYMTSK			-0.00125144	1196.61	599.312	1196.61	599.313	2	18	2.1.1.1917.2
fig|11428.3.peg.4956	0.607303	94.96	TLAHLLK			-0.00415179	794.497	398.256	794.501	398.258	2	8	3.1.1.1624.6
fig|11428.3.peg.4544	2	99	FHVAEHLYEK			0.00351285	1271.63	424.885	1271.63	424.884	3	15	6.1.1.1443.3
fig|11428.3.peg.4544	2	99	IHAEGLKPISR			0.00233682	1219.71	407.576	1219.7	407.575	3	14	6.1.1.1378.4
fig|11428.3.peg.4544	2	99	LGEQFELVRPI			0.00105775	1299.72	650.867	1299.72	650.867	2	17	6.1.1.1997.3
fig|11428.3.peg.4544	2	99	LLTGSIIPRPVAFVTSVTK			-0.00360432	1998.18	667.069	1998.19	667.07	3	16	6.1.1.2078.4
fig|11428.3.peg.4544	2	99	LTPIESEVISVPGVK			-0.00271254	1566.88	784.449	1566.89	784.451	2	24	5.1.1.2086.4
fig|11428.3.peg.4544	0.402305	94.46	LLTGSIIPR		cleaved R-P@C-term	0.00142054	968.603	485.309	968.602	485.308	2	10	5.1.1.1861.6
fig|11428.3.peg.4544	0.238824	92.69	PVAFVTSVTK		cleaved R-P@N-term	-0.00499589	1047.59	524.803	1047.6	524.805	2	10	5.1.1.1775.12
fig|11428.3.peg.4544	0.0163737	99	MLSINPNEQTEKDNYK	Oxidation(M)@1; Dehydrated(S)@3	missed K-D@12	0.00506628	1920.89	641.305	1920.89	641.304	3	14	6.1.1.1464.14
fig|11428.3.peg.4034	2	99	AQQWVDTHSPEEIAAAVSPLFK			0.00306891	2423.22	808.746	2423.21	808.745	3	29	5.1.1.2645.2
fig|11428.3.peg.4034	2	99	KKLDSFNWNDVK		missed K-K@1; missed K-L@2	0.00317359	1492.77	747.393	1492.77	747.391	2	14	5.1.1.1755.23
fig|11428.3.peg.4034	2	99	QHSYATNPLLDAEEWKQLQTIMK		missed K-Q@16	0.00325579	2743.37	686.849	2743.36	686.848	4	21	6.1.1.2129.2
fig|11428.3.peg.4034	2	99	VGEVTHSLFYAPLYVGIEK			0.00628684	2121.12	708.048	2121.11	708.045	3	23	6.1.1.2080.3
fig|11428.3.peg.4034	1.48149	99	GVTFLGQR			-0.00140868	876.48	439.247	876.482	439.248	2	12	4.1.1.1685.6
fig|11428.3.peg.4034	0.643974	95.42	IAESVIKK		missed K-K@7	-0.000287665	886.548	444.281	886.549	444.282	2	7	4.1.1.1419.6
fig|11428.3.peg.4034	0.301899	85.96	ESTKEQTQNIR		missed K-E@4	0.00769302	1332.67	445.231	1332.66	445.228	3	10	6.1.1.1214.3
fig|11428.3.peg.4034	0.288193	85.21	EVPHEALVNTK			-0.000324878	1235.65	412.891	1235.65	412.891	3	11	4.1.1.1520.8
fig|11428.3.peg.4034	0.0213631	99	KGGMPQMVGEYVLK		missed K-G@1	1.01371	1536.8	513.273	1535.78	512.935	3	19	5.1.1.1900.2
fig|11428.3.peg.1558	2	99	GHVIEEPETIATAIR			-0.00346947	1634.86	545.96	1634.86	545.962	3	20	1.1.1.1631.4
fig|11428.3.peg.1558	2	99	IHGFEAEGAAAIVK			0.00585275	1411.75	471.591	1411.75	471.589	3	19	4.1.1.1718.10
fig|11428.3.peg.1558	2	99	TEGVFAEPGSNASLAGVIK			0.00226313	1845.95	923.982	1845.95	923.981	2	18	4.1.1.1931.8
fig|11428.3.peg.1558	2	99	YEGANPTGSFK			0.00505785	1169.54	585.778	1169.54	585.775	2	12	2.1.1.1560.8
fig|11428.3.peg.1558	2	99	YEGANPTGSFKDR		missed K-D@11	0.00175223	1440.67	721.34	1440.66	721.339	2	11	5.1.1.1582.22
fig|11428.3.peg.1558	0.728158	96.39	QLGIQLYGK			-0.00251371	1018.58	510.297	1018.58	510.298	2	12	6.1.1.1624.6
fig|11428.3.peg.5947	2	99	EGEKIETLDDQER		missed K-I@4	0.00585967	1560.73	521.251	1560.73	521.25	3	19	3.1.1.1598.6
fig|11428.3.peg.5947	2	99	LSLVPQLLEAVSYNVAR			0.000601344	1871.05	936.533	1871.05	936.533	2	19	6.1.1.2504.3
fig|11428.3.peg.5947	2	99	SGIEVEGVEVLNK			-0.00254104	1371.72	686.868	1371.72	686.87	2	17	2.1.1.1859.6
fig|11428.3.peg.5947	2	99	TLQSHHLVITNGTK	Deamidated(N)@11		-0.00264245	1548.82	775.419	1548.83	775.42	2	14	1.1.1.1416.25
fig|11428.3.peg.5947	2	99	VGAVLPGNFK			-0.00344016	1000.57	501.291	1000.57	501.293	2	13	1.1.1.1598.5
fig|11428.3.peg.5947	0.617983	95.03	IETLDDQER			0.000594789	1117.53	559.77	1117.53	559.77	2	8	2.1.1.1514.17
fig|11428.3.peg.5947	0.121478	66.28	GVVVGHVLECEKHPEADKLSK	Carbamidomethyl(C)@10	missed K-H@12; missed K-L@18	-0.00359856	2330.2	777.741	2330.21	777.742	3	11	1.1.1.1473.23
fig|11428.3.peg.4422	2	99	FGEIAGLR			-0.00275661	861.468	431.741	861.471	431.743	2	10	3.1.1.1781.2
fig|11428.3.peg.4422	2	99	GEEVAATVIDGPK			-0.00119339	1284.66	643.335	1284.66	643.335	2	15	5.1.1.1737.23
fig|11428.3.peg.4422	2	99	HLITLEDLTDSDINQIVTR			-0.00366513	2195.14	732.721	2195.14	732.722	3	27	6.1.1.2169.2
fig|11428.3.peg.4422	2	99	MLDALVAR			-0.0051876	887.485	444.75	887.49	444.752	2	13	5.1.1.1798.5
fig|11428.3.peg.4422	2	99	MLPSEVDVVYTTR			-0.000529219	1508.75	755.384	1508.75	755.385	2	18	2.1.1.1856.6
fig|11428.3.peg.4422	0.88941	97.62	SAFSVAALK			-0.000213251	892.502	447.258	892.502	447.258	2	10	4.1.1.1760.5
fig|11428.3.peg.4928	2	99	GDGVTGEDITQNLK			-0.000100875	1445.7	723.857	1445.7	723.857	2	17	6.1.1.1560.12
fig|11428.3.peg.4928	2	99	LNEEKEQNGEDVFANPR	Deamidated(N)@8	missed K-E@5	0.00540683	1988.91	663.978	1988.91	663.976	3	18	2.1.1.1616.23
fig|11428.3.peg.4928	2	99	TGVVTPTAELEPVR			0.000589255	1467.79	734.904	1467.79	734.904	2	17	6.1.1.1610.12
fig|11428.3.peg.4928	2	99	VDDVALQESLGTTAK			0.00480994	1545.79	773.904	1545.79	773.902	2	16	2.1.1.1754.16
fig|11428.3.peg.4928	1.74473	99	FPAEEVVTR			0.00198845	1046.54	524.278	1046.54	524.277	2	11	5.1.1.1714.8
fig|11428.3.peg.4928	0.826814	97.19	CINPTCPAQIR	Carbamidomethyl(C)@1; Carbamidomethyl(C)@6		0.0100271	1328.64	665.329	1328.63	665.324	2	10	5.1.1.1678.15
fig|11428.3.peg.4928	0.185087	76.21	LTGIELSVGR			-0.00229786	1043.6	522.805	1043.6	522.806	2	9	2.1.1.1787.8
fig|11428.3.peg.4928	0.126098	67.1	WAIAYK			-0.00372247	750.403	376.209	750.406	376.211	2	6	2.1.1.1721.2
fig|11428.3.peg.4928	0.0899095	58.14	LEEEVALR			0.00224215	957.516	479.765	957.513	479.764	2	8	5.1.1.1678.5
fig|11428.3.peg.105	2	99	DNHLFLSVVQR			0.000852299	1326.71	443.242	1326.7	443.242	3	11	4.1.1.1858.2
fig|11428.3.peg.105	2	99	NTATQYVNYDKNHFKK		missed K-N@11; missed K-K@15	0.0115139	1969.98	493.501	1969.96	493.498	4	15	1.1.1.1432.10
fig|11428.3.peg.105	2	99	SDIASSSLAYHQAIVR			0.00160071	1716.88	573.301	1716.88	573.3	3	16	3.1.1.1753.15
fig|11428.3.peg.105	2	99	TSDGIYLSGAK			-0.000686344	1110.56	556.285	1110.56	556.285	2	14	4.1.1.1616.8
fig|11428.3.peg.105	2	99	YFNGTNIDAEQR	Deamidated(N)@3		0.00151975	1427.63	714.824	1427.63	714.823	2	13	2.1.1.1675.21
fig|11428.3.peg.105	0.514279	93.17	FYAGDSIR			0.00227513	927.447	464.731	927.445	464.73	2	9	5.1.1.1658.10
fig|11428.3.peg.105	0.326058	87.07	NTATQYVNYDK			0.00460027	1315.61	658.812	1315.6	658.81	2	9	4.1.1.1583.22
fig|11428.3.peg.105	0.083546	56.09	LTGWYVSK			0.00250512	952.504	477.259	952.502	477.258	2	8	5.1.1.1779.7
fig|11428.3.peg.105	0.075204	83.1	QNLKDYYIK	Gln->pyro-Glu@N-term	cleaved M-Q@N-term; missed K-D@4	-0.00759617	1166.59	584.302	1166.6	584.306	2	11	5.1.1.1826.9
fig|11428.3.peg.3470	2	99	ITHATHLYNQMR			0.0019907	1483.74	742.876	1483.74	742.875	2	10	3.1.1.1542.23
fig|11428.3.peg.3470	2	99	KITHATHLYNQMR		missed K-I@1	0.00358163	1611.83	538.285	1611.83	538.284	3	16	1.1.1.1350.10
fig|11428.3.peg.3470	2	99	LEDGTLAGSILK			-0.00147845	1215.67	608.842	1215.67	608.843	2	15	2.1.1.1845.13
fig|11428.3.peg.3470	2	99	TQIVINAK			0.000420272	885.529	443.772	885.528	443.771	2	9	6.1.1.1418.9
fig|11428.3.peg.3470	1.55284	99	GAHFEYIHLEGPYVSK			0.0015851	1845.91	616.309	1845.91	616.309	3	14	4.1.1.1827.7
fig|11428.3.peg.3470	0.752027	96.52	KVSVITDAMR		missed K-V@1	0.00416826	1118.62	373.879	1118.61	373.878	3	10	5.1.1.1657.5
fig|11428.3.peg.3470	0.419075	90.66	QWQEASGNLIK			-0.00269844	1272.64	637.329	1272.65	637.33	2	12	3.1.1.1747.14
fig|11428.3.peg.3470	0.153663	71.73	MKTQIVINAK		missed K-T@2	0.00124765	1144.67	382.562	1144.66	382.562	3	10	1.1.1.1438.3
fig|11428.3.peg.3470	0.145087	70.4	VSVITDAMR			0.00033109	990.517	496.266	990.517	496.266	2	8	4.1.1.1687.6
fig|11428.3.peg.457	2	99	AQVDVQTTAK			0.000292028	1059.56	530.785	1059.56	530.785	2	10	2.1.1.1420.11
fig|11428.3.peg.457	2	99	LMDNDQNVLVK			0.00690105	1287.66	644.835	1287.65	644.832	2	16	3.1.1.1714.8
fig|11428.3.peg.457	2	99	NEEGVFVLTPALNK			-0.00452533	1529.8	765.909	1529.81	765.912	2	20	5.1.1.2085.4
fig|11428.3.peg.457	2	99	TNYQHQNMLPR			-0.00374392	1400.66	701.336	1400.66	701.338	2	10	5.1.1.1592.23
fig|11428.3.peg.457	1.22915	98.96	DQSQIILR			-0.00267248	971.537	486.776	971.54	486.777	2	12	5.1.1.1700.7
fig|11428.3.peg.457	0.9914	98.13	TDKYYIFK		missed K-Y@3	-0.000869146	1076.55	539.284	1076.55	539.284	2	12	6.1.1.1541.12
fig|11428.3.peg.457	0.546682	93.75	ELLMVAR			0.00317801	830.472	416.243	830.468	416.241	2	8	2.1.1.1710.4
fig|11428.3.peg.457	0.153663	71.68	SDLTPVSVK			-0.00237661	944.516	473.265	944.518	473.266	2	9	2.1.1.1585.6
fig|11428.3.peg.457	0.0705811	51.27	AILTYTGNKK		missed K-K@9	0.00117663	1107.63	370.217	1107.63	370.217	3	7	5.1.1.1570.3
fig|11428.3.peg.457	0.0222764	23.96	SFTLIQEK			-0.00136573	964.522	483.268	964.523	483.269	2	10	4.1.1.1734.3
fig|11428.3.peg.457	0.011441	21.56	QEITLNK	Gln->pyro-Glu@N-term		-0.00150166	827.438	414.726	827.439	414.727	2	7	5.1.1.1731.4
fig|1428.368.peg.3570; fig|11428.3.peg.2868	2	99	AADGVVLCTPEYHNAMSGALK	Carbamidomethyl(C)@8		0.00726104	2203.05	735.356	2203.04	735.354	3	17	2.1.1.1822.8
fig|1428.368.peg.3570; fig|11428.3.peg.2868	2	99	GGINALNSMR			-0.00138383	1031.52	516.766	1031.52	516.766	2	17	6.1.1.1525.9
fig|1428.368.peg.3570; fig|11428.3.peg.2868	2	99	LVVINGTPR	Deamidated(N)@5		-0.000343432	968.565	485.29	968.565	485.29	2	12	4.1.1.1659.11
fig|1428.368.peg.3570; fig|11428.3.peg.2868	2	99	QVVLDGLHVQDGELGEDAKPLIHDVVK	Gln->pyro-Glu@N-term		0.00412932	2905.52	727.388	2905.52	727.387	4	16	6.1.1.2074.3
fig|1428.368.peg.3570; fig|11428.3.peg.2868	2	99	YIADQFEGELYDLAIEELPLYNGEESQR	Deamidated(N)@22		-0.00225481	3304.53	1102.52	3304.53	1102.52	3	24	4.1.1.3391.2
fig|1428.368.peg.3570; fig|11428.3.peg.2868	1.00877	98.2	GVYANAIPK			0.000317223	931.513	466.764	931.513	466.764	2	11	2.1.1.1600.10
fig|1428.368.peg.3570; fig|11428.3.peg.2868	0.05061	42.25	DLEAVKK		missed K-K@6	-0.00286102	801.457	401.736	801.46	401.737	2	6	6.1.1.1251.4
fig|11428.3.peg.2270	2	99	DMVESMAATADR			-0.00156086	1295.55	648.781	1295.55	648.782	2	17	3.1.1.1801.11
fig|11428.3.peg.2270	2	99	HSYEGIELDLK			0.00244323	1302.65	652.331	1302.65	652.33	2	19	1.1.1.1638.10
fig|11428.3.peg.2270	2	99	LNAGVVQPSK			-0.00116616	1011.57	506.792	1011.57	506.793	2	14	1.1.1.1389.4
fig|11428.3.peg.2270	2	99	TVHMESIVESK			-0.00296129	1258.62	630.317	1258.62	630.319	2	17	1.1.1.1479.15
fig|11428.3.peg.2270	0.943095	97.86	GVVFSYDGK			0.00253563	970.479	486.247	970.476	486.245	2	10	6.1.1.1559.7
fig|11428.3.peg.2270	0.562249	93.98	LQYDLGLSK			-0.00791278	1035.55	518.783	1035.56	518.787	2	12	1.1.1.1627.4
fig|11428.3.peg.2270	0.546682	93.71	FSHWSFGK			-0.0012994	994.465	498.24	994.466	498.24	2	10	5.1.1.1753.12
fig|11428.3.peg.2270	0.465974	91.91	VIDKEWEHVR		missed K-E@4	-0.000481063	1309.68	437.566	1309.68	437.567	3	9	3.1.1.1615.4
fig|11428.3.peg.2270	0.303644	85.66	YNNPTEEMKR		missed K-R@9	-0.00597492	1280.58	641.295	1280.58	641.298	2	7	2.1.1.1477.21
fig|11428.3.peg.2270	0.171985	74.16	MFEDIEERYNNPTEEMKR		missed R-Y@8; missed K-R@17	0.000124084	2330.03	583.515	2330.03	583.515	4	12	2.1.1.1775.13
fig|11428.3.peg.2270	0.0496351	41.76	MFEDIEER			0.00570085	1067.47	534.74	1067.46	534.737	2	10	5.1.1.1757.7
fig|11428.3.peg.2270	0.0319843	30.95	DKIFEVR		missed K-I@2	-0.00172071	905.495	453.755	905.497	453.756	2	9	5.1.1.1656.8
fig|11428.3.peg.5991	2	99	GSAYIGAIR			-0.00057098	906.492	454.253	906.492	454.253	2	13	5.1.1.1684.11
fig|11428.3.peg.5991	2	99	LESQAEVAMLK			-0.00271775	1217.63	609.822	1217.63	609.824	2	15	5.1.1.1771.19
fig|11428.3.peg.5991	2	99	SFVNKEEHFTTTDTIDEVNK		missed K-E@5	0.00571714	2353.11	785.378	2353.11	785.376	3	19	6.1.1.1553.17
fig|11428.3.peg.5991	1.95861	99	ISMSIPFFFK			-0.00127093	1215.64	608.825	1215.64	608.825	2	14	6.1.1.2269.2
fig|11428.3.peg.5991	1.72125	99	TGKDVFFQGTNVSTHQLR		missed K-D@3	0.011876	2034.04	509.517	2034.03	509.514	4	11	2.1.1.1698.10
fig|11428.3.peg.5991	1.24413	98.99	LISNIEDHSTLR			0.00110337	1396.73	466.585	1396.73	466.584	3	13	5.1.1.1685.11
fig|11428.3.peg.5991	0.14691	70.32	TLMNSGYTSTK			0.00097562	1201.57	601.79	1201.56	601.79	2	9	5.1.1.1618.18
fig|11428.3.peg.1294	2	99	DKNITVIIKPHPWEK		missed K-N@2	9.42569e-05	1817.02	455.262	1817.02	455.262	4	16	1.1.1.1571.4
fig|11428.3.peg.1294	2	99	FSAGNFSHFNPEYTK			0.00135327	1744.79	873.4	1744.78	873.4	2	20	2.1.1.1794.21
fig|11428.3.peg.1294	2	99	GGTDSQIEILGHPR			0.00313636	1478.75	740.383	1478.75	740.381	2	22	1.1.1.1536.9
fig|11428.3.peg.1294	2	99	TQVYVELTK			0.000409344	1079.59	540.801	1079.59	540.8	2	13	2.1.1.1684.11
fig|11428.3.peg.1294	2	99	VLYDSSYSTTAK			-0.00139858	1333.64	667.827	1333.64	667.827	2	14	2.1.1.1599.22
fig|11428.3.peg.1294	1.05552	98.37	YLSVAPIEEK			-0.00125876	1147.61	574.813	1147.61	574.814	2	12	5.1.1.1782.4
fig|11428.3.peg.1294	0.10902	62.52	IFLTYK			0.000196692	783.453	392.734	783.453	392.734	2	7	5.1.1.1791.2
fig|11428.3.peg.4642	2	99	GNEVVAVQAPAAK			-0.00205432	1252.68	627.345	1252.68	627.346	2	12	2.1.1.1579.21
fig|11428.3.peg.4642	2	99	LIDSSNIDEFEYKK		missed K-K@13	-0.0023534	1699.83	850.921	1699.83	850.923	2	15	2.1.1.1770.17
fig|11428.3.peg.4642	2	99	QAMQPVAPVEVETK			-0.000293071	1525.78	763.898	1525.78	763.898	2	17	2.1.1.1688.26
fig|11428.3.peg.4642	2	99	RGNEVVAVQAPAAK		missed R-G@1	-0.00456388	1408.77	470.599	1408.78	470.6	3	14	2.1.1.1514.12
fig|11428.3.peg.4642	2	99	VAAAQAEAPKQEEK		missed K-Q@10	-0.000487859	1468.75	490.591	1468.75	490.591	3	14	2.1.1.1365.5
fig|11428.3.peg.4642	1.18046	98.81	KRGNEVVAVQAPAAK		missed K-R@1; missed R-G@2	0.00198221	1536.88	513.299	1536.87	513.298	3	8	6.1.1.1343.16
fig|1428.368.peg.3417; fig|11428.3.peg.4473	2	99	DHIVISEPQSGK			0.00548452	1308.67	655.344	1308.67	655.341	2	10	4.1.1.1531.18
fig|1428.368.peg.3417; fig|11428.3.peg.4473	2	99	DHIVISEPQSGKR		missed K-R@12	0.000322534	1464.77	489.264	1464.77	489.263	3	14	3.1.1.1535.14
fig|1428.368.peg.3417; fig|11428.3.peg.4473	2	99	GSSLGTQSYTGIIEAAGR			0.00129412	1766.88	884.448	1766.88	884.447	2	26	4.1.1.1897.7
fig|1428.368.peg.3417; fig|11428.3.peg.4473	2	99	MLPLEQSYIENILR		cleaved G-M@N-term	0.000699327	1717.91	859.961	1717.91	859.961	2	22	3.1.1.2812.2
fig|1428.368.peg.3417; fig|11428.3.peg.4473	1.92082	99	QATVVMTYER	Gln->pyro-Glu@N-term		-0.0010162	1179.56	590.787	1179.56	590.787	2	14	2.1.1.1820.8
fig|1428.368.peg.3417; fig|11428.3.peg.4473	1.33724	99	GKQATVVMTYER		missed K-Q@2	0.00386226	1381.71	691.86	1381.7	691.858	2	11	6.1.1.1433.21
fig|11428.3.peg.3501	2	99	FHFYEGYDMQK			-0.0027331	1463.62	732.815	1463.62	732.816	2	19	1.1.1.1629.13
fig|11428.3.peg.3501	2	99	TLGGDAVGMSTVPEVIVAR			-0.000284619	1870.98	936.498	1870.98	936.498	2	26	1.1.1.2060.3
fig|11428.3.peg.3501	2	99	VLGISCISNMAAGILDQPLHHDEVIETTER	Carbamidomethyl(C)@6		0.00379763	3317.64	830.418	3317.64	830.417	4	29	3.1.1.2761.2
fig|11428.3.peg.3501	2	99	VQEGVYVGMTGPVYETPAEIR			0.00570881	2294.13	765.718	2294.13	765.716	3	25	4.1.1.1958.2
fig|11428.3.peg.3501	1.76955	99	QVAADLNIK			0.000561492	970.545	486.28	970.545	486.28	2	13	4.1.1.1619.8
fig|11428.3.peg.3501	1.49485	99	ANFLALVK			-0.00268959	874.525	438.27	874.528	438.271	2	13	4.1.1.1932.2
fig|1428.368.peg.3917; fig|11428.3.peg.3193	2	99	EKAEEIEEEAR		missed K-A@2	-0.00134862	1331.62	666.817	1331.62	666.818	2	12	2.1.1.1472.21
fig|1428.368.peg.3917; fig|11428.3.peg.3193	2	99	ELFGQGLTTIVPIVGGGER			-0.0044259	1942.05	972.031	1942.05	972.033	2	23	6.1.1.2213.4
fig|1428.368.peg.3917; fig|11428.3.peg.3193	2	99	KLESAGVIESR		missed K-L@1	0.000320545	1187.65	396.891	1187.65	396.891	3	11	6.1.1.1386.5
fig|1428.368.peg.3917; fig|11428.3.peg.3193	2	99	KLNALLQSAAGKPVNFR		missed K-L@1	0.00081379	1826.05	457.521	1826.05	457.52	4	16	2.1.1.1762.5
fig|1428.368.peg.3917; fig|11428.3.peg.3193	2	99	LLGYAIHQQIENER			-0.000523747	1682.87	842.444	1682.87	842.444	2	21	2.1.1.1733.14
fig|1428.368.peg.3917; fig|11428.3.peg.3193	1.23657	98.94	LGTLVLAR			-0.000999646	841.537	421.776	841.539	421.777	2	12	4.1.1.1720.5
fig|1428.368.peg.3917; fig|11428.3.peg.3193	0.0705811	50.34	SVIVNALR			0.000696222	870.529	436.272	870.529	436.272	2	9	2.1.1.1677.3
fig|1428.368.peg.3929	2	99	GGGISETFTVR			0.000159359	1122.57	562.291	1122.57	562.291	2	15	6.1.1.1569.10
fig|1428.368.peg.3929	2	99	GGGISETFTVRK		missed R-K@11	-0.00302857	1250.66	417.894	1250.66	417.895	3	13	5.1.1.1670.2
fig|1428.368.peg.3929	2	99	IQLFEGVVIK			-0.00495917	1144.68	573.348	1144.69	573.35	2	17	4.1.1.2013.2
fig|1428.368.peg.3929	2	99	ISYGVGVER			-0.00122549	978.512	490.263	978.513	490.264	2	12	2.1.1.1604.11
fig|1428.368.peg.3929	2	99	KISYGVGVER		missed K-I@1	-0.00143249	1106.61	369.876	1106.61	369.877	3	13	5.1.1.1599.4
fig|1428.368.peg.3929	0.841638	97.14	TDLPSFRPGDTLR			-0.000818774	1473.76	492.26	1473.76	492.26	3	13	6.1.1.1624.3
fig|1428.368.peg.3929	0.536107	93.31	RGGGISETFTVR		missed R-G@1	-0.00259492	1278.67	640.34	1278.67	640.341	2	12	1.1.1.1513.10
fig|1428.368.peg.4545; fig|11428.3.peg.5222	2	99	DAQGGEVTVVTVGGEDSEK			-0.00647099	1875.86	938.939	1875.87	938.942	2	13	2.1.1.1682.26
fig|1428.368.peg.4545; fig|11428.3.peg.5222	2	99	DAQGGEVTVVTVGGEDSEKELR		missed K-E@19	0.000901437	2274.1	759.04	2274.1	759.04	3	19	1.1.1.1607.24
fig|1428.368.peg.4545; fig|11428.3.peg.5222	2	99	TIEIYLPPKK		missed K-K@9	-0.00067492	1200.71	401.244	1200.71	401.245	3	13	1.1.1.1573.2
fig|1428.368.peg.4545; fig|11428.3.peg.5222	2	99	VLQGELQDQVK			-0.00161522	1255.68	628.845	1255.68	628.846	2	16	3.1.1.1663.19
fig|1428.368.peg.4545; fig|11428.3.peg.5222	2	99	VLQGELQDQVKE		cleaved E-L@C-term; missed K-E@11	-0.00151507	1384.72	693.366	1384.72	693.367	2	17	3.1.1.1692.12
fig|1428.368.peg.4545; fig|11428.3.peg.5222	1.14267	98.65	TALAMGCDK	Carbamidomethyl(C)@7		-0.00201482	965.429	483.722	965.431	483.723	2	8	2.1.1.1492.16
fig|1428.368.peg.4545; fig|11428.3.peg.5222	0.145087	69.34	ELVSLLHTEAK			-0.0135389	1238.67	413.898	1238.69	413.903	3	11	1.1.1.1598.2
fig|1428.368.peg.4545; fig|11428.3.peg.5222	0.129011	66.34	VLAEYLK			-0.00839334	834.477	418.246	834.485	418.25	2	8	4.1.1.1684.6
fig|11428.3.peg.1168	2	99	EVGSFPTEDLKNEK		missed K-N@11	0.0162439	1591.79	531.604	1591.77	531.598	3	15	6.1.1.1508.7
fig|11428.3.peg.1168	2	99	KVEATGAEFR		missed K-V@1	0.0026952	1106.57	369.865	1106.57	369.865	3	9	4.1.1.1460.3
fig|11428.3.peg.1168	2	99	KVMDDVTFKENSR		missed K-V@1; missed K-E@9	0.00437253	1567.77	523.597	1567.77	523.596	3	13	6.1.1.1423.14
fig|11428.3.peg.1168	2	99	VFENFLSQINIMER			-0.00573182	1738.87	870.44	1738.87	870.443	2	20	6.1.1.2262.2
fig|11428.3.peg.1168	2	99	VNEGGSPLTMLSHMIEASER			0.00199766	2157.02	720.014	2157.02	720.014	3	17	6.1.1.2276.2
fig|11428.3.peg.1168	0.826814	97	VMDDVTFKENSRK		missed K-E@8; missed R-K@12	0.00583543	1567.77	392.95	1567.77	392.949	4	9	6.1.1.1396.4
fig|11428.3.peg.1168	0.323306	86.24	KEVGSFPTEDLKNEK		missed K-E@1; missed K-N@12	0.00065926	1719.87	574.297	1719.87	574.297	3	8	4.1.1.1576.17
fig|11428.3.peg.1168	0.196543	76.43	FVGPSIATR			-0.00506914	946.518	474.267	946.524	474.269	2	10	6.1.1.1515.7
fig|11428.3.peg.1168	0.0660068	48.26	VMDDVTFKENSR		missed K-E@8	-0.000861655	1439.67	720.843	1439.67	720.843	2	9	6.1.1.1455.22
fig|11428.3.peg.1168	0.0163737	18.09	LTEVGAGIR			-0.0098488	914.509	458.262	914.519	458.267	2	9	2.1.1.1569.7
fig|11428.3.peg.3553	2	99	ETAEGGLAATPTGR			-0.00384023	1329.65	665.832	1329.65	665.833	2	12	6.1.1.1403.20
fig|11428.3.peg.3553	2	99	GLSGDTILDAVSK			-0.00158887	1274.67	638.342	1274.67	638.343	2	15	4.1.1.1917.5
fig|11428.3.peg.3553	2	99	NAAELVAQAK			0.00193221	1013.55	507.784	1013.55	507.783	2	13	1.1.1.1463.13
fig|11428.3.peg.3553	2	99	SISREEVIAGMEK		missed R-E@4	-0.00239931	1447.73	724.873	1447.73	724.874	2	14	6.1.1.1526.21
fig|11428.3.peg.3553	2	99	SPTGLTGGDAVK			-0.0045164	1101.56	551.788	1101.57	551.791	2	20	2.1.1.1508.5
fig|11428.3.peg.3553	1.19382	98.81	IGQTMPVALR			0.000616995	1084.61	543.311	1084.61	543.31	2	12	4.1.1.1718.15
fig|11428.3.peg.3553	0.232102	80	NLVVMEQAVER			0.0138241	1286.68	644.347	1286.67	644.34	2	10	2.1.1.1784.15
fig|11428.3.peg.3553	0.0172766	18.64	EEVIAGMEK			-0.0113983	1004.47	503.244	1004.48	503.25	2	8	3.1.1.1638.14
fig|1428.368.peg.6066	2	99	EANVSMATVSR			0.000605283	1163.56	582.788	1163.56	582.788	2	12	2.1.1.1562.14
fig|1428.368.peg.6066	2	99	HFIEQGHKR		missed K-R@8	0.000398936	1150.6	384.541	1150.6	384.54	3	13	1.1.1.1183.3
fig|1428.368.peg.6066	2	99	IGFVSGPFIDK			-0.0021568	1178.63	590.323	1178.63	590.324	2	19	4.1.1.1952.2
fig|1428.368.peg.6066	2	99	LALMVRPQLSTVVQPMYDIGAVAMR			-0.00302181	2758.47	920.496	2758.47	920.497	3	25	6.1.1.2239.9
fig|1428.368.peg.6066	2	99	VVNGNPNVKPTTR			0.000201903	1394.76	465.928	1394.76	465.928	3	10	5.1.1.1462.5
fig|1428.368.peg.6066	0.703335	95.79	NVTIYDVAR		cleaved M-N@N-term	-0.00122713	1049.55	525.782	1049.55	525.783	2	10	5.1.1.1778.8
fig|1428.368.peg.6066	0.533132	93.15	YNIILSNSDQNKEK		missed K-E@12	-0.00844878	1664.83	833.422	1664.84	833.426	2	10	6.1.1.1484.26
fig|1428.368.peg.6066	0.207608	77.5	EKVEDHTVILPHR		missed K-V@2	0.00438652	1571.85	524.956	1571.84	524.955	3	10	6.1.1.1404.7
fig|1428.368.peg.6066	0.0273344	26.85	YNIILSNSDQNK			0.00511777	1407.7	704.86	1407.7	704.857	2	8	2.1.1.1701.15
fig|1428.368.peg.6066	0.0150229	46	LGYRPNAVAR	Deamidated(N)@6		-0.000464794	1116.6	373.209	1116.6	373.209	3	7	5.1.1.1579.3
fig|11428.3.peg.6126	2	99	ALATWFKEEIL		missed K-E@7	-0.00137509	1319.71	660.863	1319.71	660.864	2	17	6.1.1.2180.3
fig|11428.3.peg.6126	2	99	ELGLSLIGNDLVR			-0.000392096	1397.79	699.901	1397.79	699.901	2	15	6.1.1.2117.8
fig|11428.3.peg.6126	2	99	ESGLNTHNQVEAIK			0.00161201	1538.77	770.393	1538.77	770.392	2	14	6.1.1.1406.23
fig|11428.3.peg.6126	2	99	GPLELFSEGR			0.00330172	1103.56	552.789	1103.56	552.788	2	14	4.1.1.1934.7
fig|11428.3.peg.6126	2	99	YFSACPWEGVQR	Carbamidomethyl(C)@5		0.000369511	1498.67	750.341	1498.67	750.34	2	16	5.1.1.1916.8
fig|11428.3.peg.6126	0.821023	96.92	ILPEDHSIETHFER			-0.000388904	1721.84	574.953	1721.84	574.953	3	13	6.1.1.1534.10
fig|11428.3.peg.6126	0.392545	89.2	IGYDENGELFTK			0.00338272	1384.65	693.335	1384.65	693.333	2	12	5.1.1.1841.15
fig|11428.3.peg.6126	0.298432	84.73	TTLSFR			-0.000718565	723.391	362.703	723.392	362.703	2	6	4.1.1.1604.3
fig|11428.3.peg.1205	2	99	ELLQHSLQTMK			-0.00100572	1326.7	664.355	1326.7	664.356	2	18	5.1.1.1709.12
fig|11428.3.peg.1205	2	99	IVDVEQFLK			-0.00128606	1089.61	545.81	1089.61	545.811	2	15	6.1.1.2007.2
fig|11428.3.peg.1205	2	99	LANHEITIVEEK			0.00178874	1394.74	465.921	1394.74	465.921	3	17	1.1.1.1498.6
fig|11428.3.peg.1205	2	99	LANHEITIVEEKTEK		missed K-T@12	-0.0027096	1752.92	585.315	1752.93	585.316	3	20	6.1.1.1477.11
fig|11428.3.peg.1205	2	99	MGGVAGVATYPEYR			0.00329137	1469.7	735.857	1469.7	735.856	2	19	2.1.1.1753.8
fig|11428.3.peg.1205	1.50864	99	MGGVAGVATYPEYRR		missed R-R@14	0.0248234	1625.82	542.948	1625.8	542.94	3	14	1.1.1.1543.14
fig|11428.3.peg.1205	0.0305841	28.87	KPFIYDFF			-0.00316591	1075.53	538.775	1075.54	538.776	2	10	6.1.1.2239.2
fig|11428.3.peg.3202	2	99	ENPNKEITLQVKR		missed K-E@5; missed K-R@12	-0.000346462	1567.87	392.974	1567.87	392.974	4	11	6.1.1.1416.6
fig|11428.3.peg.3202	2	99	MAGEDADTVELKPGKK		missed K-K@15	0.00241461	1687.85	563.623	1687.85	563.622	3	13	5.1.1.1573.24
fig|11428.3.peg.3202	2	99	VGLVLNEKDEVVK		missed K-D@8	0.000651474	1440.82	481.28	1440.82	481.28	3	17	5.1.1.1760.9
fig|11428.3.peg.3202	2	99	VMDNSAAQQAGLK			-0.00117304	1331.65	666.832	1331.65	666.832	2	11	5.1.1.1601.23
fig|11428.3.peg.3202	2	99	VTPTLDKEGKDEVGR		missed K-E@7; missed K-D@10	4.67919e-05	1642.85	411.72	1642.85	411.72	4	12	5.1.1.1545.5
fig|11428.3.peg.3202	0.950782	97.79	SGFEQTYQWTK			0.00133872	1373.63	687.821	1373.63	687.82	2	12	5.1.1.1830.9
fig|11428.3.peg.3202	0.510041	92.59	EFAIGFGPK			-0.00141568	964.5	483.257	964.502	483.258	2	9	4.1.1.1862.4
fig|11428.3.peg.3202	0.127261	65.56	LLPLGGYVR			-0.00306923	986.588	494.301	986.591	494.303	2	10	5.1.1.1922.4
fig|1428.368.peg.6319; fig|11428.3.peg.1969	2	99	ASIGQVGNEQHELIK			-0.00233083	1621.84	811.927	1621.84	811.928	2	24	1.1.1.1511.23
fig|1428.368.peg.6319; fig|11428.3.peg.1969	2	99	GSVMNPVDHPHGGGEGR			0.00215938	1701.77	568.263	1701.76	568.262	3	14	1.1.1.1343.10
fig|1428.368.peg.6319; fig|11428.3.peg.1969	2	99	IGNALPLINIPVGTVVHNIELKPGR			0.0116531	2633.55	659.395	2633.54	659.392	4	23	1.1.1.2385.2
fig|1428.368.peg.6319; fig|11428.3.peg.1969	2	99	SANIALINYVDGEKR		missed K-R@14	0.000571323	1661.87	554.965	1661.87	554.965	3	17	2.1.1.1860.5
fig|1428.368.peg.6319; fig|11428.3.peg.1969	2	99	VATIEYDPNR			-0.00100711	1176.58	589.295	1176.58	589.296	2	16	5.1.1.1668.4
fig|1428.368.peg.6319; fig|11428.3.peg.1969	0.779892	96.54	SAGTSAQVLGK			0.00231343	1017.55	509.781	1017.55	509.78	2	9	6.1.1.1343.15
fig|1428.368.peg.6319; fig|11428.3.peg.1969	0.548214	93.36	YILAPK			0.00114142	703.428	352.721	703.427	352.721	2	6	4.1.1.1576.3
fig|1428.368.peg.6319; fig|11428.3.peg.1969	0.322393	85.9	SLLAPLSK			-0.000139876	827.511	414.763	827.512	414.763	2	9	6.1.1.1600.2
fig|11428.3.peg.1080	2	99	LIVIDPEGGTQPK			-0.000365706	1365.75	683.882	1365.75	683.882	2	13	4.1.1.1754.18
fig|11428.3.peg.1080	2	99	LVEYLWNVPFNIK			0.000266969	1633.89	817.951	1633.89	817.951	2	18	6.1.1.2272.2
fig|11428.3.peg.1080	2	99	SAYPTSQDPHYLQTIR			0.00326235	1875.91	938.965	1875.91	938.963	2	19	6.1.1.1556.24
fig|11428.3.peg.1080	2	99	TLHTYSVDFVNSAK			0.00779579	1580.79	527.938	1580.78	527.935	3	14	5.1.1.1800.7
fig|11428.3.peg.1080	1.4437	99	ALQPALPDDVR			-0.00283793	1193.64	597.826	1193.64	597.828	2	11	4.1.1.1720.13
fig|11428.3.peg.1080	1.04096	98.23	RALQPALPDDVR		missed R-A@1	-0.0076005	1349.73	450.919	1349.74	450.921	3	13	6.1.1.1504.7
fig|11428.3.peg.1080	0.863279	97.2	DHLGVKPLFFTER			0.00374395	1557.83	520.285	1557.83	520.284	3	13	5.1.1.1893.2
fig|11428.3.peg.1080	0.380907	88.57	FLPFLLDR			-0.00135975	1019.58	510.797	1019.58	510.797	2	11	6.1.1.2148.2
fig|11428.3.peg.5622	2	99	NDGGARPGTTVTHEANVPTDR			0.00240768	2164.03	722.35	2164.03	722.349	3	14	1.1.1.1366.19
fig|11428.3.peg.5622	2	99	PGTTVTHEANVPTDR		cleaved R-P@N-term	-0.00099827	1593.77	532.265	1593.77	532.266	3	16	1.1.1.1365.10
fig|11428.3.peg.5622	2	99	SDLDLVPFYVK			0.00251163	1294.68	648.349	1294.68	648.348	2	19	1.1.1.2227.2
fig|11428.3.peg.5622	2	99	VTLNGGTNTFK	Deamidated(N)@4		0.00121025	1151.58	576.799	1151.58	576.798	2	16	5.1.1.1699.4
fig|11428.3.peg.5622	1.42022	99	KGWNPNKPLTR		missed K-G@1	-0.00223556	1309.72	437.582	1309.73	437.582	3	9	4.1.1.1504.9
fig|11428.3.peg.5622	1.42022	99	KVTLNGGTNTFK	Deamidated(N)@5	missed K-V@1	-0.00530114	1279.67	427.565	1279.68	427.566	3	11	4.1.1.1563.10
fig|11428.3.peg.5622	0.841638	97.01	GWNPNKPLTR			0.00449314	1181.63	394.886	1181.63	394.884	3	9	3.1.1.1630.5
fig|11428.3.peg.5622	0.113509	98.59	HGYVESPASR		cleaved A-H@N-term	0.00360257	1101.52	368.182	1101.52	368.181	3	10	4.1.1.1402.2
fig|11428.3.peg.5622	0.0525663	41.38	LTAPHSTK			-0.000581516	853.465	427.74	853.466	427.74	2	7	6.1.1.1201.3
fig|11428.3.peg.5057	2	99	LQEETITFAQDEGVR			-0.000212793	1734.84	868.428	1734.84	868.429	2	17	2.1.1.1802.25
fig|11428.3.peg.5057	2	99	LTLSLIHEMK			0.00202023	1183.67	592.84	1183.66	592.839	2	15	2.1.1.1829.7
fig|11428.3.peg.5057	2	99	LTLSLIHEMKR		missed K-R@10	-0.0028167	1339.76	670.888	1339.76	670.89	2	13	2.1.1.1752.15
fig|11428.3.peg.5057	2	99	YCSSGLQSIAYGAER	Carbamidomethyl(C)@2		-0.00162948	1660.75	831.382	1660.75	831.383	2	20	2.1.1.1775.20
fig|11428.3.peg.5057	2	99	YGISREEQDAFAVR		missed R-E@5	-0.00174546	1639.79	820.904	1639.8	820.905	2	20	1.1.1.1596.9
fig|11428.3.peg.5057	1.88606	99	MREAVIVAGAR		missed R-E@2	0.00472284	1171.65	391.559	1171.65	391.557	3	10	1.1.1.1436.2
fig|11428.3.peg.3043	2	99	FFIDTANLEDIKK		missed K-K@12	-0.00251672	1552.81	518.611	1552.81	518.612	3	17	4.1.1.1922.2
fig|11428.3.peg.3043	2	99	IAEICQAVPK	Carbamidomethyl(C)@5		8.77874e-06	1127.6	564.808	1127.6	564.808	2	17	3.1.1.1687.13
fig|11428.3.peg.3043	2	99	IAELFDVHQLDTQIIAASVR			0.967605	2239.17	747.397	2238.2	747.074	3	24	6.1.1.2199.3
fig|11428.3.peg.3043	2	99	VAMAGAHIATIPYK			-0.00112768	1441.77	481.599	1441.78	481.599	3	20	1.1.1.1585.3
fig|11428.3.peg.3043	2	99	VESVSAEVTPDAVTAEEMIAQAEELIK			0.000262215	2858.41	953.811	2858.41	953.811	3	23	3.1.1.3588.2
fig|11428.3.peg.3043	2	99	VIEQLAMHPLTDQGIEK			0.00350786	1921	641.341	1921	641.34	3	17	2.1.1.1815.10
fig|11428.3.peg.2160	2	99	AGANTDSEILGK			0.00312772	1174.59	588.3	1174.58	588.299	2	14	4.1.1.1555.21
fig|11428.3.peg.2160	2	99	AQADAEAQAEVK			-0.00298697	1229.59	615.8	1229.59	615.802	2	13	1.1.1.1340.13
fig|11428.3.peg.2160	2	99	AQKPATQQPVAK			-0.00030567	1265.71	422.91	1265.71	422.91	3	11	1.1.1.1190.2
fig|11428.3.peg.2160	2	99	AREAAEAQAEVK		missed R-E@2	-0.00163112	1271.65	424.889	1271.65	424.89	3	18	1.1.1.1275.5
fig|11428.3.peg.2160	2	99	EAAEAQAEVK			-0.000690123	1044.51	523.261	1044.51	523.262	2	14	5.1.1.1444.9
fig|11428.3.peg.2160	2	99	TAYVHVPYLTGK			0.000158688	1347.72	450.247	1347.72	450.247	3	15	5.1.1.1841.2
fig|11428.3.peg.4218	2	99	AVIGLGWDIK			-8.31657e-05	1070.61	536.313	1070.61	536.313	2	14	6.1.1.1993.3
fig|11428.3.peg.4218	2	99	FNAVGSGFQGGLGALVR			-0.00223886	1648.87	825.44	1648.87	825.442	2	29	6.1.1.2036.6
fig|11428.3.peg.4218	2	99	LANEETSEEVLR			0.00014448	1388.68	695.346	1388.68	695.346	2	17	3.1.1.1667.19
fig|11428.3.peg.4218	2	99	SQNFGQVGNAFVR			5.9163e-05	1422.7	712.357	1422.7	712.357	2	20	2.1.1.1789.23
fig|11428.3.peg.4218	2	99	TGEGEGDDEQLVVDLK			-0.00959627	1702.78	852.397	1702.79	852.402	2	20	4.1.1.1823.10
fig|11428.3.peg.4218	2	99	TGEGEGDDEQLVVDLKK		missed K-K@16	0.0100045	1830.89	611.306	1830.88	611.302	3	20	6.1.1.1575.13
fig|1428.368.peg.6102; fig|11428.3.peg.5844	2	99	DLSFGEAYGLVMK			-0.00215102	1428.69	715.354	1428.7	715.355	2	19	6.1.1.2162.2
fig|1428.368.peg.6102; fig|11428.3.peg.5844	2	99	FNQDAAGIENAK			0.00122346	1276.61	639.31	1276.6	639.31	2	14	1.1.1.1439.18
fig|1428.368.peg.6102; fig|11428.3.peg.5844	2	99	GNPMTLVGTEVK			-5.58523e-05	1244.64	623.329	1244.64	623.329	2	16	3.1.1.1829.8
fig|1428.368.peg.6102; fig|11428.3.peg.5844	2	99	RFNQDAAGIENAK		missed R-F@1	0.00588419	1432.71	717.363	1432.71	717.36	2	20	1.1.1.1407.7
fig|1428.368.peg.6102; fig|11428.3.peg.5844	2	99	VGDQAPNFQVLANDLSPVSLETYKGEVK		missed K-G@24	0.00154017	3017.54	1006.85	3017.53	1006.85	3	23	6.1.1.2179.6
fig|1428.368.peg.6102; fig|11428.3.peg.5844	2	99	WCAANGLENVVTLSDHR	Carbamidomethyl(C)@2; Deamidated(N)@5		-0.00210876	1941.9	648.307	1941.9	648.307	3	20	4.1.1.1923.7
fig|11428.3.peg.1407	2	99	AKHELPNLPYAYDALEPHFDKETMNIHHTK		cleaved M-A@N-term; missed K-H@2; missed K-E@21	0.0326737	3558.77	594.135	3558.74	594.13	6	27	2.1.1.1833.7
fig|11428.3.peg.1407	2	99	FGSFDAFKEEFAK		missed K-E@8	0.00109462	1521.71	508.246	1521.71	508.245	3	21	2.1.1.2029.2
fig|11428.3.peg.1407	2	99	RPDYIGAFWNVVDWNAAEK			-0.0138221	2250.07	751.031	2250.09	751.036	3	16	6.1.1.2249.2
fig|11428.3.peg.1407	2	99	RPDYIGAFWNVVDWNAAEKR		missed K-R@19	-0.00189333	2406.19	803.069	2406.19	803.07	3	23	6.1.1.2174.12
fig|11428.3.peg.1407	2	99	SVEELVANLNEVPEAIR			0.000793352	1880.99	941.5	1880.98	941.499	2	22	1.1.1.2352.4
fig|11428.3.peg.1407	2	99	TPVIGLDVWEHAYYLNYQNR			0.00122704	2450.2	817.742	2450.2	817.741	3	21	6.1.1.2176.3
fig|11428.3.peg.447	2	99	ADEYVEVVR			-0.00203918	1078.53	540.271	1078.53	540.272	2	13	4.1.1.1644.11
fig|11428.3.peg.447	2	99	AVIGSGDFVIGPK			-0.00254268	1258.69	630.352	1258.69	630.353	2	17	2.1.1.1868.5
fig|11428.3.peg.447	2	99	EAGDGHVLSSHGR			-0.00559311	1320.61	441.211	1320.62	441.213	3	11	4.1.1.1347.4
fig|11428.3.peg.447	2	99	EKEAGDGHVLSSHGR		missed K-E@2	0.00299909	1577.76	526.927	1577.75	526.925	3	18	2.1.1.1313.2
fig|11428.3.peg.447	2	99	IPSSMMDFLEKADEYVEVVR		missed K-A@11	0.00686888	2357.14	786.719	2357.13	786.717	3	22	6.1.1.2429.2
fig|11428.3.peg.447	2	99	VIDMNLASEGK			0.000595115	1175.59	588.8	1175.59	588.8	2	12	4.1.1.1700.13
fig|11428.3.peg.5229	2	99	AIMGDGGLANCGNSQNCVQSCPK	Carbamidomethyl(C)@11; Carbamidomethyl(C)@17; Carbamidomethyl(C)@21		0.00246603	2437.03	813.35	2437.02	813.349	3	18	4.1.1.1661.26
fig|11428.3.peg.5229	2	99	AWIPIDGTYDLGPGPR			-0.00111602	1726.87	864.441	1726.87	864.441	2	15	6.1.1.2059.6
fig|11428.3.peg.5229	2	99	CMTCGVCLESCPNVNSK	Carbamidomethyl(C)@1; Carbamidomethyl(C)@4; Carbamidomethyl(C)@7; Carbamidomethyl(C)@11		0.0152509	2014.82	1008.42	2014.8	1008.41	2	15	6.1.1.1552.14
fig|11428.3.peg.5229	2	99	GIPLTTSIAALNR			0.00112331	1325.77	663.891	1325.77	663.891	2	20	4.1.1.1934.9
fig|11428.3.peg.5229	2	99	QSCTALIDQLEQPIR	Carbamidomethyl(C)@3		0.0162005	1770.91	886.462	1770.89	886.454	2	21	6.1.1.1992.11
fig|11428.3.peg.5229	2	99	SDFIGPAPLSQAR			-0.000492555	1357.7	679.857	1357.7	679.857	2	15	6.1.1.1639.5
fig|11428.3.peg.5229	0.0190881	19.47	LFNSHPTGEMHK			-0.00108912	1396.65	350.171	1396.66	350.171	4	8	5.1.1.1530.2
fig|1428.368.peg.2904; fig|11428.3.peg.4666	2	99	AAIRDEDPVLFFEHKR		missed R-D@4; missed K-R@15	0.00075267	1942.01	486.509	1942.01	486.509	4	15	2.1.1.1797.4
fig|1428.368.peg.2904; fig|11428.3.peg.4666	2	99	ATHGLYDQFGEDR			-0.00210681	1507.67	754.841	1507.67	754.842	2	17	1.1.1.1528.22
fig|1428.368.peg.2904; fig|11428.3.peg.4666	2	99	FFMVNPDKVEK		missed K-V@8	-0.000556142	1352.68	451.9	1352.68	451.901	3	15	1.1.1.1618.5
fig|1428.368.peg.2904; fig|11428.3.peg.4666	2	99	LAQDGISAHILDLR			-0.0025621	1520.83	507.95	1520.83	507.951	3	18	4.1.1.1899.2
fig|1428.368.peg.2904; fig|11428.3.peg.4666	2	99	SNNDWTCPVTIR	Carbamidomethyl(C)@7		-0.00270118	1461.66	731.84	1461.67	731.841	2	17	2.1.1.1781.13
fig|1428.368.peg.2904; fig|11428.3.peg.4666	2	99	TVYPLDKEAIIEAASK		missed K-E@7	0.000143307	1746.94	583.321	1746.94	583.321	3	19	2.1.1.1846.4
fig|1428.368.peg.2904; fig|11428.3.peg.4666	0.0254883	24.45	IVIPSTPYDAK			-0.00293242	1202.65	602.333	1202.65	602.335	2	10	3.1.1.1799.5
fig|11428.3.peg.5173	2	99	FLRPHDEDILKPDVDSVIK			0.0065857	2235.2	559.806	2235.19	559.805	4	23	2.1.1.1809.5
fig|11428.3.peg.5173	2	99	FLRPHDEDILKPDVDSVIKR		missed K-R@19	-4.0901e-06	2391.29	598.83	2391.29	598.83	4	17	2.1.1.1769.11
fig|11428.3.peg.5173	2	99	IDEGHIEISK			0.00459631	1139.59	570.801	1139.58	570.798	2	10	4.1.1.1551.20
fig|11428.3.peg.5173	2	99	MYVNIQHVK			-0.000917896	1130.59	377.87	1130.59	377.871	3	13	1.1.1.1485.4
fig|11428.3.peg.5173	1.79588	99	TVYISLK			-0.00241024	822.483	412.249	822.485	412.25	2	9	4.1.1.1703.8
fig|11428.3.peg.5173	1.22915	98.83	SIGENIYVK			-0.00247042	1021.54	511.778	1021.54	511.779	2	13	1.1.1.1527.11
fig|11428.3.peg.5173	0.790485	96.46	NELPVNPLNITLAR			0.00234575	1562.88	782.447	1562.88	782.446	2	13	1.1.1.2196.3
[truncated: 5,851 more rows]

## Sheet: Areas E-SE10.2
Table S5.3 Peak areas values of the of the specific search with the supernatants and solubilized proteins from spore/crystal mixtures with MarkerView									Table S5.4 Peak areas values of the of the specific search with the supernatants and solubilized proteins from spore/crystal mixtures corrected by totalareasum.
		Supernatant									Supernatant
		24 h			48 h						24 h			48 h
Row	Peak Name	R1	R2	R3	R1	R2	R3		Row	Peak Name	R1	R2	R3	R1	R2	R3
1	fig|11428.3.peg.4698	530054	640269	596908	458362	431312	615747		1	fig|11428.3.peg.4698	742884	655946	507744	555258	349525	572631
2	fig|11428.3.peg.4662	3.07864e+06	7.39737e+06	7.69413e+06	6.12908e+06	7.89156e+06	6.01448e+06		2	fig|11428.3.peg.4662	4.31479e+06	7.57849e+06	6.54481e+06	7.42475e+06	6.39513e+06	5.59333e+06
3	fig|11428.3.peg.5686	129974	243407	179198	228571	177556	359373		3	fig|11428.3.peg.5686	182161	249366	152430	276890	143887	334209
4	fig|11428.3.peg.4932	335.226	2684.15	268.437	5691.86	4467.67	3766.29		4	fig|11428.3.peg.4932	469.828	2749.87	228.339	6895.1	3620.5	3502.56
5	fig|11428.3.peg.5228	92910.6	66057.7	67924.3	292241	456806	298738		5	fig|11428.3.peg.5228	130217	67675.2	57778	354020	370185	277820
6	fig|11428.3.peg.4245	111880	239652	201197	283383	394716	465388		6	fig|11428.3.peg.4245	156803	245520	171143	343289	319868	432800
7	fig|11428.3.peg.3413	1.36603e+06	2.55174e+06	2.70166e+06	1.84912e+06	3.10152e+06	2.47101e+06		7	fig|11428.3.peg.3413	1.91452e+06	2.61422e+06	2.2981e+06	2.24002e+06	2.5134e+06	2.29799e+06
8	fig|11428.3.peg.6121	94385.7	126445	82170.2	106657	165044	80487.7		8	fig|11428.3.peg.6121	132284	129541	69895.9	129203	133748	74851.7
9	fig|11428.3.peg.5764	157852	192741	224793	174165	159599	236839		9	fig|11428.3.peg.5764	221233	197460	191215	210983	129336	220255
10	fig|11428.3.peg.5682	57885.8	179779	121704	75850.5	85353.9	27699		10	fig|11428.3.peg.5682	81128.5	184181	103524	91885.1	69168.8	25759.5
11	fig|11428.3.peg.2315	937456	607255	506511	392563	1.7495e+06	1.86561e+06		11	fig|11428.3.peg.2315	1.31387e+06	622123	430850	475550	1.41776e+06	1.73498e+06
12	fig|11428.3.peg.2213	1.52267e+06	2.31413e+06	2.07737e+06	1.51747e+06	1.55796e+06	2.66396e+06		12	fig|11428.3.peg.2213	2.13406e+06	2.37079e+06	1.76706e+06	1.83825e+06	1.26253e+06	2.47742e+06
13	fig|1428.368.peg.2705	1.92855e+06	1.88063e+06	1.59391e+06	1.07787e+06	3.39441e+06	2.14013e+06		13	fig|1428.368.peg.2705	2.70291e+06	1.92668e+06	1.35582e+06	1.30572e+06	2.75075e+06	1.99027e+06
14	fig|11428.3.peg.259	45578	29873	74695.9	89501.2	33652	226045		14	fig|11428.3.peg.259	63878.7	30604.4	63538.1	108421	27270.8	210216
15	fig|1428.368.peg.4721	152777	1.05146e+06	611415	1.28732e+06	2.35454e+06	560129		15	fig|1428.368.peg.4721	214121	1.07721e+06	520084	1.55946e+06	1.90806e+06	520907
16	fig|11428.3.peg.2690	636655	392917	337031	414997	810726	2.65385e+06		16	fig|11428.3.peg.2690	892288	402537	286686	502726	656993	2.46802e+06
17	fig|11428.3.peg.685	606022	876480	959768	1.00673e+06	1.14857e+06	727397		17	fig|11428.3.peg.685	849355	897941	816401	1.21954e+06	930778	676462
18	fig|11428.3.peg.2474	234974	871614	130003	284324	953632	869918		18	fig|11428.3.peg.2474	329323	892955	110584	344429	772801	809004
19	fig|1428.368.peg.2890	352627	336371	255253	162287	435097	471706		19	fig|1428.368.peg.2890	494216	344607	217124	196594	352592	438676
20	fig|1428.368.peg.3918	290378	256133	143708	107938	210268	134603		20	fig|1428.368.peg.3918	406972	262404	122241	130756	170396	125178
21	fig|1428.368.peg.6066	13542.5	59626.8	23737.8	32921.7	92478	21200.7		21	fig|1428.368.peg.6066	18980.1	61086.8	20191.9	39881.2	74942	19716.2
22	fig|11428.3.peg.4831	1.75032e+06	523398	421326	1.01441e+06	1.16221e+06	2.00241e+06		22	fig|11428.3.peg.4831	2.45311e+06	536214	358389	1.22886e+06	941831	1.8622e+06
23	fig|11428.3.peg.3387	141392	298869	185579	230268	352208	251319		23	fig|11428.3.peg.3387	198164	306187	157858	278946	285421	233721
24	fig|11428.3.peg.3356	455372	1.39267e+06	1.72812e+06	596396	1.679e+06	1.58825e+06		24	fig|11428.3.peg.3356	638216	1.42677e+06	1.46998e+06	722472	1.36062e+06	1.47704e+06
25	fig|11428.3.peg.2160	198505	89823.4	120122	32985.8	210593	176893		25	fig|11428.3.peg.2160	278211	92022.7	102178	39958.9	170660	164506
26	fig|11428.3.peg.5677	1.48516e+06	708183	1.12303e+06	2.31389e+06	2.57997e+06	1.21247e+06		26	fig|11428.3.peg.5677	2.08149e+06	725523	955278	2.80303e+06	2.09074e+06	1.12757e+06
27	fig|11428.3.peg.2712	8772.43	49813	52898.2	28273.1	7932.65	7733.62		27	fig|11428.3.peg.2712	12294.8	51032.7	44996.5	34249.9	6428.44	7192.09
28	fig|11428.3.peg.2866	86594.4	246551	133696	37833	496486	188663		28	fig|11428.3.peg.2866	121364	252587	113725	45830.7	402341	175452
29	fig|11428.3.peg.5500	734397	516474	849630	575723	514654	916006		29	fig|11428.3.peg.5500	1.02928e+06	529120	722715	697429	417063	851865
30	fig|11428.3.peg.2830	786774	1.13803e+06	1.69595e+06	1.25953e+06	374461	1.15962e+06		30	fig|11428.3.peg.2830	1.10268e+06	1.1659e+06	1.44261e+06	1.52579e+06	303455	1.07842e+06
31	fig|11428.3.peg.2250	198418	186420	182389	172903	179252	217581		31	fig|11428.3.peg.2250	278087	190984	155144	209455	145262	202346
32	fig|11428.3.peg.2069	910301	973717	1.57178e+06	744801	1.26716e+06	1.25199e+06		32	fig|11428.3.peg.2069	1.27581e+06	997559	1.33699e+06	902250	1.02688e+06	1.16432e+06
33	fig|11428.3.peg.2276	718.563	2017.27	1323.36	413.315	1066.63	123.162		33	fig|11428.3.peg.2276	1007.08	2066.67	1125.68	500.688	864.371	114.538
34	fig|11428.3.peg.4505	675558	568072	565003	456477	1.14853e+06	1.31994e+06		34	fig|11428.3.peg.4505	946812	581981	480605	552975	930740	1.22751e+06
35	fig|11428.3.peg.1111	243358	97033.3	391413	259198	88746.7	375930		35	fig|11428.3.peg.1111	341072	99409.2	332945	313991	71918.2	349606
36	fig|11428.3.peg.5903	381761	534403	625627	230213	340633	440113		36	fig|11428.3.peg.5903	535048	547487	532173	278879	276041	409295
37	fig|11428.3.peg.1498	490595	440913	722303	467456	698100	840938		37	fig|11428.3.peg.1498	687582	451709	614408	566275	565723	782053
38	fig|11428.3.peg.447	21541.3	109511	42838.6	144878	199239	7883.36		38	fig|11428.3.peg.447	30190.6	112193	36439.6	175505	161458	7331.35
39	fig|11428.3.peg.2769	170.21	538.951	378.568	1096.64	159.898	658.61		39	fig|11428.3.peg.2769	238.554	552.147	322.019	1328.46	129.578	612.493
40	fig|11428.3.peg.3224	204490	297625	311397	222494	730153	324469		40	fig|11428.3.peg.3224	286598	304912	264882	269528	591699	301749
41	fig|11428.3.peg.1863	370096	213808	554874	188947	441975	418544		41	fig|11428.3.peg.1863	518699	219043	471989	228889	358166	389237
42	fig|11428.3.peg.4521	292559	712524	350423	362005	597996	547555		42	fig|11428.3.peg.4521	410028	729970	298078	438531	484602	509214
43	fig|11428.3.peg.268	86383.1	223341	170153	197259	193636	135852		43	fig|11428.3.peg.268	121068	228809	144736	238959	156918	126339
44	fig|11428.3.peg.1177	90426.9	109435	130503	289755	377923	215922		44	fig|11428.3.peg.1177	126736	112114	111009	351008	306260	200803
45	fig|11428.3.peg.4367	323927	2.1662e+06	269315	2.77344e+06	3.88272e+06	549871		45	fig|11428.3.peg.4367	453992	2.21924e+06	229086	3.35973e+06	3.14646e+06	511368
46	fig|11428.3.peg.1944	173883	140433	112705	89086.3	161085	237241		46	fig|11428.3.peg.1944	243701	143872	95869.7	107919	130539	220629
47	fig|11428.3.peg.5081	215990	102607	293656	175437	123856	315175		47	fig|11428.3.peg.5081	302716	105119	249790	212524	100370	293106
48	fig|11428.3.peg.1454	126079	450005	115959	315017	438312	401370		48	fig|11428.3.peg.1454	176703	461024	98637.5	381610	355198	373265
49	fig|11428.3.peg.5791	54545.6	134529	33362.6	83559.2	119962	168154		49	fig|11428.3.peg.5791	76447.1	137823	28379	101223	97214.1	156379
50	fig|11428.3.peg.6139	133189	212369	118282	153051	211280	495447		50	fig|11428.3.peg.6139	186667	217569	100614	185405	171217	460754
51	fig|11428.3.peg.5674	52090.8	16929.6	26425	96444.2	75659.1	65521.6		51	fig|11428.3.peg.5674	73006.6	17344.2	22477.7	116832	61312.4	60933.6
52	fig|1428.368.peg.6367	30755.1	122455	77420.6	67945.6	99318	29900.1		52	fig|1428.368.peg.6367	43104.1	125453	65855.8	82309	80484.9	27806.4
53	fig|11428.3.peg.4325	771885	590365	441319	59548.5	186525	118698		53	fig|11428.3.peg.4325	1.08182e+06	604821	375396	72136.9	151156	110387
54	fig|11428.3.peg.448	252669	35465	37179.9	149372	47450.6	601101		54	fig|11428.3.peg.448	354122	36333.3	31626.1	180949	38452.8	559010
55	fig|11428.3.peg.2208	195888	89380.4	142213	69828.3	138677	350105		55	fig|11428.3.peg.2208	274541	91568.9	120970	84589.8	112380	325590
56	fig|11428.3.peg.5734	159233	463690	305467	449693	695596	346009		56	fig|11428.3.peg.5734	223169	475043	259838	544756	563695	321780
57	fig|11428.3.peg.3379	482327	510205	617675	877755	1.77443e+06	2.24646e+06		57	fig|11428.3.peg.3379	675994	522698	525409	1.06331e+06	1.43795e+06	2.08915e+06
58	fig|11428.3.peg.3438	1.17041e+06	1.28481e+06	1.98414e+06	862819	2.53792e+06	1.7612e+06		58	fig|11428.3.peg.3438	1.64035e+06	1.31627e+06	1.68776e+06	1.04522e+06	2.05667e+06	1.63788e+06
59	fig|1428.368.peg.3335	563900	438458	372016	792249	1.57651e+06	1.50664e+06		59	fig|1428.368.peg.3335	790320	449194	316445	959727	1.27757e+06	1.40114e+06
60	fig|11428.3.peg.3768	121.532	753.019	896.062	160.518	1760.34	156.797		60	fig|11428.3.peg.3768	170.331	771.457	762.211	194.451	1426.54	145.818
61	fig|11428.3.peg.1647	39519.1	101829	69434.6	63730.3	74990.7	51113.9		61	fig|11428.3.peg.1647	55387	104322	59062.7	77202.6	60770.7	47534.8
62	fig|11428.3.peg.2056	116514	113333	139334	87455.4	186925	127816		62	fig|11428.3.peg.2056	163298	116108	118521	105943	151479	118866
63	fig|11428.3.peg.5022	159349	75753.4	140531	63844.5	110050	216769		63	fig|11428.3.peg.5022	223331	77608.2	119539	77340.9	89182	201590
64	fig|11428.3.peg.3993	105439	379676	195523	143352	314636	98186.1		64	fig|11428.3.peg.3993	147776	388973	166316	173656	254974	91310.8
65	fig|11428.3.peg.2174	347935	756845	1.34518e+06	752512	2.25285e+06	552484		65	fig|11428.3.peg.2174	487639	775376	1.14424e+06	911591	1.82566e+06	513798
66	fig|11428.3.peg.3188	34495.7	45739.3	34739.6	142807	151227	69500.4		66	fig|11428.3.peg.3188	48346.6	46859.3	29550.3	172996	122551	64633.8
67	fig|11428.3.peg.4414	134952	204392	66423	170597	185114	113341		67	fig|11428.3.peg.4414	189139	209397	56501	206661	150012	105405
68	fig|11428.3.peg.4642	19785.9	91974.4	101850	56943.9	111172	115020		68	fig|11428.3.peg.4642	27730.4	94226.4	86636.3	68981.7	90090.8	106966
69	fig|11428.3.peg.4018	303323	868396	363853	719001	762236	429363		69	fig|11428.3.peg.4018	425115	889659	309502	870996	617698	399298
70	fig|11428.3.peg.3223	123590	76312.7	260046	100590	230191	216659		70	fig|11428.3.peg.3223	173215	78181.2	221201	121855	186541	201488
71	fig|11428.3.peg.5308	45258.6	83006.3	62989.4	131668	336037	238896		71	fig|11428.3.peg.5308	63431.1	85038.7	53580.2	159502	272316	222168
72	fig|11428.3.peg.4327	152213	153363	289116	131208	135698	296704		72	fig|11428.3.peg.4327	213330	157118	245929	158945	109967	275928
73	fig|11428.3.peg.5656	789381	556495	1.57899e+06	206283	632352	260328		73	fig|11428.3.peg.5656	1.10634e+06	570121	1.34313e+06	249891	512443	242099
74	fig|11428.3.peg.3353	34424.4	290880	50916.6	286790	296937	71159.5		74	fig|11428.3.peg.3353	48246.6	298002	43310.8	347416	240630	66176.7
75	fig|1428.368.peg.4136	2370.15	3107.66	964.814	6675.79	4220.08	1287.86		75	fig|1428.368.peg.4136	3321.82	3183.76	820.693	8087.03	3419.85	1197.68
76	fig|11428.3.peg.3215	809075	1.11381e+06	654160	1.16036e+06	1.47934e+06	1.30248e+06		76	fig|11428.3.peg.3215	1.13394e+06	1.14108e+06	556444	1.40566e+06	1.19882e+06	1.21127e+06
77	fig|11428.3.peg.2649	6.28596e+06	1.42019e+07	8.97438e+06	1.09229e+07	1.25399e+07	1.49075e+07		77	fig|11428.3.peg.2649	8.80993e+06	1.45497e+07	7.63382e+06	1.3232e+07	1.01621e+07	1.38636e+07
78	fig|1428.368.peg.421	5118.43	34828.2	8928.9	26927.5	37916.2	3960		78	fig|1428.368.peg.421	7173.61	35681	7595.13	32619.9	30726.4	3682.71
79	fig|1428.368.peg.4694	50689.7	21887	27624.9	34049.1	24559.7	69463.7		79	fig|1428.368.peg.4694	71042.9	22422.9	23498.4	41247	19902.6	64599.7
80	fig|11428.3.peg.4268	129894	302502	279660	143008	184223	122718		80	fig|11428.3.peg.4268	182050	309908	237885	173240	149290	114125
81	fig|1428.368.peg.6298	53583.5	260313	231048	143886	495326	335566		81	fig|1428.368.peg.6298	75098.7	266687	196535	174303	401400	312069
82	fig|11428.3.peg.5000	65569.3	22057.8	119637	14230.4	21011.4	23903.3		82	fig|11428.3.peg.5000	91897	22597.9	101766	17238.6	17027.1	22229.5
83	fig|11428.3.peg.1625	329048	1.40251e+06	1.17167e+06	551544	736627	582985		83	fig|11428.3.peg.1625	461169	1.43685e+06	996648	668138	596945	542163
84	fig|11428.3.peg.4531	209194	189807	191658	156294	239109	53839		84	fig|11428.3.peg.4531	293191	194454	163028	189334	193768	50069
85	fig|11428.3.peg.1597	5.31256e+06	4.72113e+06	7.30457e+06	2.8456e+06	3.03644e+06	4.80909e+06		85	fig|11428.3.peg.1597	7.44568e+06	4.83672e+06	6.21343e+06	3.44715e+06	2.46066e+06	4.47235e+06
86	fig|11428.3.peg.5848	2074.59	13483.7	2324.97	21718.8	22602.3	3305.34		86	fig|11428.3.peg.5848	2907.59	13813.9	1977.68	26310	18316.4	3073.89
87	fig|11428.3.peg.1655	18337.1	72608.7	125287	38095.5	86496.6	225929		87	fig|11428.3.peg.1655	25700	74386.5	106572	46148.7	70094.8	210109
88	fig|11428.3.peg.3365	95648.2	195917	421325	114791	97252.8	446886		88	fig|11428.3.peg.3365	134053	200714	358389	139058	78811.4	415594
89	fig|11428.3.peg.3262	86900.5	28446.2	41677.3	51943.5	38628.3	159597		89	fig|11428.3.peg.3262	121793	29142.7	35451.6	62924.2	31303.4	148422
90	fig|11428.3.peg.5136	162392	158660	234837	100977	403467	274375		90	fig|11428.3.peg.5136	227597	162544	199758	122323	326960	255163
91	fig|11428.3.peg.5707	142074	568394	500588	506711	499602	453420		91	fig|11428.3.peg.5707	199121	582311	425812	613828	404866	421670
92	fig|11428.3.peg.2833	99333.2	94535.9	106619	88134.2	98352.2	213892		92	fig|11428.3.peg.2833	139218	96850.6	90692.2	106765	79702.3	198915
93	fig|11428.3.peg.2139	30078.7	36974.8	49480.9	46337.5	64848.9	45606.4		93	fig|11428.3.peg.2139	42156	37880.1	42089.6	56133	52552	42412.9
94	fig|11428.3.peg.2783	1.1251e+07	1.40151e+07	2.64063e+07	7.19571e+06	8.34513e+06	9.68374e+06		94	fig|11428.3.peg.2783	1.57685e+07	1.43583e+07	2.24618e+07	8.71686e+06	6.76269e+06	9.00566e+06
95	fig|11428.3.peg.4957	597239	327970	619016	687542	812569	975764		95	fig|11428.3.peg.4957	837046	336000	526550	832885	658487	907439
96	fig|11428.3.peg.1959	124643	214809	227764	208753	238190	224040		96	fig|11428.3.peg.1959	174691	220068	193741	252882	193023	208353
97	fig|1428.368.peg.5950	12137.1	107234	35969.4	105007	46068.5	19658.4		97	fig|1428.368.peg.5950	17010.4	109859	30596.4	127205	37332.8	18281.9
98	fig|11428.3.peg.4966	150900	437029	278545	568914	501171	272126		98	fig|11428.3.peg.4966	211491	447729	236937	689181	406137	253071
99	fig|11428.3.peg.3015	6519.56	28781	4568.82	30619.7	24135.3	8375.34		99	fig|11428.3.peg.3015	9137.34	29485.7	3886.34	37092.6	19558.7	7788.88
100	fig|11428.3.peg.2661	94864.1	16773.9	177613	76573.5	38074.4	143885		100	fig|11428.3.peg.2661	132955	17184.6	151082	92760.8	30854.6	133810
101	fig|1428.368.peg.3916	311627	244475	267792	118944	151142	292650		101	fig|1428.368.peg.3916	436753	250461	227790	144089	122482	272158
102	fig|1428.368.peg.1048	1.20458e+06	9.54964e+06	4.78058e+06	4.74098e+06	7.02724e+06	1.44899e+06		102	fig|1428.368.peg.1048	1.68825e+06	9.78346e+06	4.06647e+06	5.74321e+06	5.69471e+06	1.34753e+06
103	fig|1428.368.peg.4584	763656	784593	683026	580597	817949	1.08663e+06		103	fig|1428.368.peg.4584	1.07028e+06	803803	580998	703333	662846	1.01054e+06
104	fig|11428.3.peg.3056	41771.8	137498	48412.5	57827.8	40444.9	50024.3		104	fig|11428.3.peg.3056	58544.2	140864	41180.8	70052.4	32775.6	46521.5
105	fig|11428.3.peg.4500	99595.3	246427	272355	220410	175702	231153		105	fig|11428.3.peg.4500	139585	252460	231672	267003	142385	214967
106	fig|11428.3.peg.93	22583.7	37942.3	24066.6	7570.32	26330.9	9572.74		106	fig|11428.3.peg.93	31651.6	38871.3	20471.6	9170.66	21337.9	8902.43
107	fig|1428.368.peg.6319	104243	436737	237780	335224	447059	202055		107	fig|1428.368.peg.6319	146099	447430	202261	406089	362286	187907
108	fig|1428.368.peg.3334	91524.7	115285	173823	302842	659166	411039		108	fig|1428.368.peg.3334	128274	118108	147858	366862	534172	382257
109	fig|11428.3.peg.4825	1.69999e+06	1.68353e+06	1.09636e+06	676702	2.14547e+06	1.81584e+06		109	fig|11428.3.peg.4825	2.38258e+06	1.72476e+06	932586	819755	1.73863e+06	1.68869e+06
110	fig|11428.3.peg.5892	25213.4	38006.7	28079.2	46426.6	60042.5	34993.4		110	fig|11428.3.peg.5892	35337.2	38937.3	23884.8	56241	48657	32543
111	fig|11428.3.peg.3384	24535.5	42098.1	90452.3	36084	95359.9	70410.8		111	fig|11428.3.peg.3384	34387.2	43128.9	76940.9	43712	77277.4	65480.5
112	fig|11428.3.peg.1861	518400	335096	592977	289492	301338	125428		112	fig|11428.3.peg.1861	726551	343301	504400	350689	244197	116646
113	fig|11428.3.peg.4028	127896	102147	172312	101258	110479	236838		113	fig|11428.3.peg.4028	179249	104648	146573	122664	89529.6	220254
114	fig|11428.3.peg.612	65288.3	164054	100264	68721.6	120724	81267.5		114	fig|11428.3.peg.612	91503.2	168071	85287.3	83249.2	97832	75577
115	fig|11428.3.peg.5675	49102.3	193938	54169.7	933462	916632	132934		115	fig|11428.3.peg.5675	68818.2	198687	46078	1.13079e+06	742817	123625
116	fig|11428.3.peg.2209	4.12121e+06	662867	3.92136e+06	1.96581e+06	3.30565e+06	6.76842e+06		116	fig|11428.3.peg.2209	5.77598e+06	679098	3.3356e+06	2.38137e+06	2.67882e+06	6.29447e+06
117	fig|1428.368.peg.6172	79996.4	99708.3	31114.1	39962.9	73959.7	59844.4		117	fig|1428.368.peg.6172	112117	102150	26466.4	48410.9	59935.2	55654
118	fig|11428.3.peg.5183	35272.2	9986.19	36545.7	6431.05	8303.71	3575.33		118	fig|11428.3.peg.5183	49434.9	10230.7	31086.6	7790.55	6729.13	3324.97
119	fig|11428.3.peg.3191	85189.2	371914	524483	318064	428859	83481.2		119	fig|11428.3.peg.3191	119395	381020	446138	385301	347537	77635.7
120	fig|11428.3.peg.5908	100769	301043	856638	209235	478512	311997		120	fig|11428.3.peg.5908	141230	308414	728676	253467	387775	290150
121	fig|11428.3.peg.5204	20727.8	47077.3	39493.6	85678.7	226423	232051		121	fig|11428.3.peg.5204	29050.6	48230	33594.2	103791	183488	215802
122	fig|1428.368.peg.4245	75993.2	69810.2	220787	140532	49150.2	291778		122	fig|1428.368.peg.4245	106506	71519.5	187807	170240	39830.1	271347
123	fig|11428.3.peg.964	1.32716e+06	1.95043e+06	3.66925e+06	2.9829e+06	2.51745e+06	3.76433e+06		123	fig|11428.3.peg.964	1.86005e+06	1.99818e+06	3.12115e+06	3.61347e+06	2.04008e+06	3.50074e+06
124	fig|1428.368.peg.3861	64812.3	565242	979514	552057	316494	931359		124	fig|1428.368.peg.3861	90836	579082	833198	668760	256479	866143
125	fig|11428.3.peg.2039	1.064e+06	1.62414e+06	1.02148e+06	1.04587e+06	618938	493715		125	fig|11428.3.peg.2039	1.49122e+06	1.66391e+06	868896	1.26696e+06	501573	459144
126	fig|11428.3.peg.1455	142065	152781	267527	113917	138257	170354		126	fig|11428.3.peg.1455	199108	156521	227565	137999	112040	158426
127	fig|11428.3.peg.3775	152383	254883	219879	178064	541941	481777		127	fig|11428.3.peg.3775	213568	261124	187034	215706	439176	448042
128	fig|11428.3.peg.5200	61585.9	120895	138705	124277	250362	177065		128	fig|11428.3.peg.5200	86314.2	123855	117985	150549	202887	164667
129	fig|11428.3.peg.4557	133375	109998	181639	148002	659201	726913		129	fig|11428.3.peg.4557	186928	112691	154506	179289	534201	676013
130	fig|11428.3.peg.1403	89102.4	203842	209903	122162	251815	106025		130	fig|11428.3.peg.1403	124879	208833	178548	147987	204065	98600.5
131	fig|11428.3.peg.1958	477573	1.12873e+06	673987	774756	1.1683e+06	590410		131	fig|11428.3.peg.1958	669331	1.15637e+06	573309	938537	946764	549068
132	fig|11428.3.peg.2733	611905	646504	477817	619830	591991	887995		132	fig|11428.3.peg.2733	857601	662334	406442	750859	479735	825816
133	fig|11428.3.peg.4387	269315	430899	714232	263776	440259	349291		133	fig|11428.3.peg.4387	377452	441449	607542	319537	356776	324833
134	fig|11428.3.peg.5409	434014	261213	170732	284003	406788	932673		134	fig|11428.3.peg.5409	608282	267609	145228	344040	329651	867365
135	fig|11428.3.peg.3391	18979.1	131872	389686	111546	198220	205336		135	fig|11428.3.peg.3391	26599.7	135101	331476	135126	160633	190957
136	fig|11428.3.peg.4829	89775.1	82264.3	104403	74621	159973	143732		136	fig|11428.3.peg.4829	125822	84278.6	88807.7	90395.6	129638	133668
137	fig|11428.3.peg.5861	54280.5	17005.9	14837.7	19788.6	47890.3	120590		137	fig|11428.3.peg.5861	76075.5	17422.3	12621.3	23971.9	38809.2	112146
138	fig|11428.3.peg.522	254429	735492	681369	1.24022e+06	749505	293548		138	fig|11428.3.peg.522	356589	753500	579588	1.5024e+06	607381	272993
139	fig|11428.3.peg.5622	157244	211143	509658	238000	306841	241198		139	fig|11428.3.peg.5622	220381	216313	433527	288312	248656	224309
140	fig|1428.368.peg.6120	257682	621607	442028	424310	441996	561588		140	fig|1428.368.peg.6120	361148	636827	375999	514008	358183	522264
141	fig|11428.3.peg.5528	1.9864e+06	1.72681e+06	2.76167e+06	936977	1.81282e+06	2.665e+06		141	fig|11428.3.peg.5528	2.784e+06	1.76909e+06	2.34914e+06	1.13505e+06	1.46906e+06	2.47839e+06
142	fig|11428.3.peg.3503	2582.26	1037.22	26086.3	730.47	849.51	447.268		142	fig|11428.3.peg.3503	3619.11	1062.61	22189.6	884.888	688.423	415.949
143	fig|11428.3.peg.5505	810.923	8570.99	1287.63	15323.8	677.847	1168.51		143	fig|11428.3.peg.5505	1136.53	8780.85	1095.29	18563.2	549.311	1086.69
144	fig|11428.3.peg.1897	442692	870256	1.02991e+06	511209	1.41028e+06	1.80172e+06		144	fig|11428.3.peg.1897	620444	891564	876064	619277	1.14286e+06	1.67556e+06
145	fig|1428.368.peg.5482	5363.91	43736.4	6625.71	6478.33	9077.7	4645.21		145	fig|1428.368.peg.5482	7517.65	44807.3	5635.99	7847.83	7356.35	4319.94
146	fig|11428.3.peg.5599	327388	434351	508243	377432	830026	1.02896e+06		146	fig|11428.3.peg.5599	458843	444986	432323	457220	672634	956913
147	fig|11428.3.peg.638	378749	108593	725844	115138	126619	232624		147	fig|11428.3.peg.638	530827	111252	617420	139477	102609	216335
148	fig|11428.3.peg.5714	145062	129311	101424	177235	318873	194135		148	fig|11428.3.peg.5714	203308	132477	86273.7	214702	258407	180541
149	fig|11428.3.peg.1596	4.40635e+06	3.03784e+06	7.09378e+06	2.71258e+06	2.15668e+06	4.76544e+06		149	fig|11428.3.peg.1596	6.17562e+06	3.11222e+06	6.03413e+06	3.28601e+06	1.74772e+06	4.43176e+06
150	fig|11428.3.peg.1346	1485.76	18116	532.951	5679.17	330.153	633.013		150	fig|11428.3.peg.1346	2082.33	18559.5	453.341	6879.72	267.548	588.688
151	fig|11428.3.peg.3950	216982	184119	132922	132192	135985	434848		151	fig|11428.3.peg.3950	304106	188627	113067	160137	110199	404399
152	fig|11428.3.peg.3381	216793	743141	431629	583469	658670	496010		152	fig|11428.3.peg.3381	303842	761337	367154	706812	533770	461278
153	fig|1428.368.peg.6174	281795	373729	337779	451909	262128	475591		153	fig|1428.368.peg.6174	394943	382880	287323	547441	212422	442289
154	fig|11428.3.peg.2317	406601	690271	921925	595417	1.13867e+06	172523		154	fig|11428.3.peg.2317	569862	707172	784211	721286	922749	160442
155	fig|11428.3.peg.3835	2750.56	10122.8	2616.59	8571.82	15322	412.594		155	fig|11428.3.peg.3835	3854.98	10370.6	2225.73	10383.9	12416.6	383.703
156	fig|11428.3.peg.2121	2991.48	32900.3	4584.08	23958.1	42505.4	3886.54		156	fig|11428.3.peg.2121	4192.63	33705.9	3899.33	29022.7	34445.3	3614.39
157	fig|11428.3.peg.5162	306921	2.12942e+06	1.08296e+06	1.18682e+06	301043	248227		157	fig|11428.3.peg.5162	430157	2.18156e+06	921194	1.43771e+06	243958	230845
158	fig|11428.3.peg.1740	20241.2	102129	86026.1	64251.3	120215	15530.5		158	fig|11428.3.peg.1740	28368.6	104630	73175.8	77833.8	97419.5	14443
159	fig|1428.368.peg.4134	39249.5	59851.7	17329	109032	26498.9	76755.6		159	fig|1428.368.peg.4134	55009.2	61317.2	14740.5	132081	21474.1	71381
160	fig|1428.368.peg.4585	153130	116779	604711	128722	384047	544157		160	fig|1428.368.peg.4585	214616	119638	514381	155933	311223	506053
161	fig|11428.3.peg.4925	1.68186e+06	1.60304e+06	2.15449e+06	1.01924e+06	1.59884e+06	2.46631e+06		161	fig|11428.3.peg.4925	2.35717e+06	1.64229e+06	1.83266e+06	1.2347e+06	1.29566e+06	2.29361e+06
162	fig|1428.368.peg.4705	72832.7	4151.88	86265.5	12992.4	17517.3	14356.5		162	fig|1428.368.peg.4705	102077	4253.54	73379.4	15738.9	14195.6	13351.2
163	fig|11428.3.peg.3463	100638	261257	226452	219562	263105	243574		163	fig|11428.3.peg.3463	141047	267654	192626	265977	213214	226519
164	fig|11428.3.peg.3527	2618.91	19983.4	1643.2	8902.33	11449.2	1259.67		164	fig|11428.3.peg.3527	3670.47	20472.7	1397.75	10784.2	9278.13	1171.46
165	fig|11428.3.peg.1595	2.16017e+06	2.46596e+06	5.07009e+06	3.29644e+06	4.28842e+06	3.11612e+06		165	fig|11428.3.peg.1595	3.02753e+06	2.52634e+06	4.31273e+06	3.9933e+06	3.47523e+06	2.89792e+06
166	fig|1428.368.peg.3402	123.751	378.749	176.758	173.065	5171.71	138.965		166	fig|1428.368.peg.3402	173.44	388.023	150.355	209.651	4191.03	129.234
167	fig|11428.3.peg.731	4088.66	29870.7	40703.4	4655.43	31144.4	36231.3		167	fig|11428.3.peg.731	5730.36	30602	34623.3	5639.57	25238.7	33694.3
168	fig|11428.3.peg.457	57615.8	75266.5	79656.1	53999.2	254098	102472		168	fig|11428.3.peg.457	80750	77109.4	67757.3	65414.4	205915	95296.4
169	fig|11428.3.peg.6021	231548	87651.5	125648	66878.3	140709	147052		169	fig|11428.3.peg.6021	324520	89797.6	106879	81016.1	114027	136755
170	fig|11428.3.peg.6146	254204	125401	309758	368896	894462	741072		170	fig|11428.3.peg.6146	356273	128472	263488	446879	724851	689180
171	fig|1428.368.peg.6308	2411	46925.8	583.402	22056.8	37915.5	1239.07		171	fig|1428.368.peg.6308	3379.07	48074.8	496.255	26719.5	30725.9	1152.3
172	fig|1428.368.peg.5351	13803.9	249573	167085	303236	224293	1782.37		172	fig|1428.368.peg.5351	19346.5	255684	142126	367340	181762	1657.56
173	fig|11428.3.peg.2389	551611	413831	700521	123796	289053	116894		173	fig|11428.3.peg.2389	773098	423964	595880	149966	234241	108709
174	fig|11428.3.peg.4034	12144.1	79291.6	53281.6	114431	26016.9	14439.2		174	fig|11428.3.peg.4034	17020.3	81233	45322.6	138621	21083.5	13428.1
175	fig|11428.3.peg.4413	5919.31	48742.8	16247.4	20322.5	59209.8	11844.6		175	fig|11428.3.peg.4413	8296.07	49936.2	13820.4	24618.6	47982.2	11015.2
176	fig|11428.3.peg.3042	17967.1	35064.3	36638.9	44434.4	40945.9	26098		176	fig|11428.3.peg.3042	25181.3	35922.9	31165.9	53827.7	33181.6	24270.6
177	fig|11428.3.peg.5690	4804.83	1340.04	3391.18	5477.11	2099.31	310.71		177	fig|11428.3.peg.5690	6734.09	1372.85	2884.62	6634.95	1701.23	288.953
178	fig|11428.3.peg.4664	314185	346455	469476	382265	564054	602216		178	fig|11428.3.peg.4664	440339	354938	399347	463074	457096	560048
179	fig|11428.3.peg.1963	2.73811e+06	3.24299e+06	4.98627e+06	2.11052e+06	4.69683e+06	3.83758e+06		179	fig|11428.3.peg.1963	3.83753e+06	3.3224e+06	4.24144e+06	2.55667e+06	3.8062e+06	3.56886e+06
180	fig|11428.3.peg.1727	5137.62	132680	118926	319009	610186	1797.88		180	fig|11428.3.peg.1727	7200.51	135928	101161	386447	494480	1671.99
181	fig|11428.3.peg.1355	7056.66	2522.28	17624.8	4906.98	18108.3	11854.7		181	fig|11428.3.peg.1355	9890.09	2584.04	14992	5944.3	14674.6	11024.6
182	fig|11428.3.peg.4969	4817.36	189982	7850.45	12375.2	8030.05	12551.4		182	fig|11428.3.peg.4969	6751.66	194634	6677.77	14991.3	6507.37	11672.5
183	fig|11428.3.peg.2270	152764	81222	89092.3	55563.5	70261.1	60437.8		183	fig|11428.3.peg.2270	214103	83210.7	75784	67309.4	56937.9	56205.8
184	fig|11428.3.peg.5725	316254	329524	421588	336472	405035	472005		184	fig|11428.3.peg.5725	443239	337593	358613	407601	328231	438954
185	fig|1428.368.peg.3374	10875.5	14912.7	20879.4	32049.9	35489.3	14863.1		185	fig|1428.368.peg.3374	15242.2	15277.8	17760.5	38825.1	28759.7	13822.3
186	fig|11428.3.peg.2045	87242.2	1.12516e+06	199388	1.01886e+06	740798	254089		186	fig|11428.3.peg.2045	122272	1.15271e+06	169604	1.23425e+06	600325	236297
187	fig|11428.3.peg.476	30159.7	30095	24929	26141.6	40964.6	44981.8		187	fig|11428.3.peg.476	42269.6	30831.9	21205.2	31667.9	33196.8	41832.1
188	fig|1428.368.peg.3996	8772.43	22173.2	11429.1	26832.1	31144.6	41845.3		188	fig|1428.368.peg.3996	12294.8	22716.1	9721.85	32504.3	25238.9	38915.1
189	fig|11428.3.peg.4908	277218	303429	225619	259537	516976	550583		189	fig|11428.3.peg.4908	388529	310858	191917	314403	418945	512030
190	fig|11428.3.peg.4520	703260	614044	912383	468392	376398	851930		190	fig|11428.3.peg.4520	985637	629079	776094	567408	305024	792275
191	fig|11428.3.peg.1617	139445	319984	237332	380362	193678	195789		191	fig|11428.3.peg.1617	195436	327819	201880	460769	156952	182079
192	fig|11428.3.peg.5953	32275	68039.5	48149.5	80516	128063	64108.3		192	fig|11428.3.peg.5953	45234.2	69705.4	40957.1	97536.8	103779	59619.2
193	fig|11428.3.peg.5676	119851	201980	105091	1.18065e+06	1.47915e+06	872562		193	fig|11428.3.peg.5676	167974	206925	89393	1.43024e+06	1.19867e+06	811463
194	fig|11428.3.peg.1112	5916.63	8224.92	1531.43	6547.6	7849.19	1595.11		194	fig|11428.3.peg.1112	8292.3	8426.31	1302.67	7931.73	6360.8	1483.42
195	fig|11428.3.peg.4506	372328	199021	642108	120902	129269	244894		195	fig|11428.3.peg.4506	521827	203894	546192	146460	104757	227746
196	fig|11428.3.peg.2444	494238	666475	1.41436e+06	617029	828615	1.54933e+06		196	fig|11428.3.peg.2444	692687	682793	1.20309e+06	747467	671490	1.44084e+06
197	fig|11428.3.peg.2763	27648.7	101087	111230	23091.6	44133.9	38476.4		197	fig|11428.3.peg.2763	38750.4	103562	94615.1	27973.1	35765.1	35782.2
198	fig|11428.3.peg.4211	32680.4	29171.4	10653.4	13715.9	7999.11	42568.2		198	fig|11428.3.peg.4211	45802.4	29885.7	9061.99	16615.4	6482.29	39587.5
199	fig|11428.3.peg.2211	229059	158567	195624	133912	266255	172208		199	fig|11428.3.peg.2211	321032	162449	166403	162220	215767	160150
200	fig|11428.3.peg.4960	1.99108e+06	1.78307e+06	3.09314e+06	1.47182e+06	3.57742e+06	2.76514e+06		200	fig|11428.3.peg.4960	2.79056e+06	1.82673e+06	2.63109e+06	1.78295e+06	2.89906e+06	2.57152e+06
201	fig|1428.368.peg.4628	21194.7	8574.79	35368.1	83863.6	102756	144243		201	fig|1428.368.peg.4628	29704.9	8784.74	30084.9	101592	83270.8	134143
202	fig|11428.3.peg.4665	7619.64	3197.77	8545.57	9082.69	2820.67	4304.8		202	fig|11428.3.peg.4665	10679.1	3276.07	7269.06	11002.7	2285.8	4003.37
203	fig|11428.3.peg.1137	42223.2	642796	678859	435640	700617	74574.4		203	fig|11428.3.peg.1137	59176.8	658535	577453	527733	567764	69352.5
204	fig|11428.3.peg.3165	32688.6	26892.3	13336.4	32119.4	33064.2	56660.3		204	fig|11428.3.peg.3165	45813.9	27550.8	11344.2	38909.3	26794.5	52692.8
205	fig|11428.3.peg.5598	267948	245532	272223	243038	576826	544172		205	fig|11428.3.peg.5598	375536	251544	231559	294415	467446	506068
206	fig|11428.3.peg.4249	351195	550484	404300	134004	605267	306812		206	fig|11428.3.peg.4249	492208	563963	343907	162333	490494	285328
207	fig|1428.368.peg.4238	28362.8	18378.3	48400.1	32170.9	33674.9	39523.2		207	fig|1428.368.peg.4238	39751.3	18828.3	41170.2	38971.7	27289.4	36755.7
208	fig|11428.3.peg.1828	169203	97949.2	189737	62318.8	132523	160663		208	fig|11428.3.peg.1828	237142	100347	161395	75492.7	107393	149413
209	fig|1428.368.peg.5202	191837	151057	270212	81724	159981	186010		209	fig|1428.368.peg.5202	268864	154755	229848	99000.2	129645	172985
210	fig|11428.3.peg.2210	471513	369967	297947	265945	244887	750268		210	fig|11428.3.peg.2210	660838	379025	253441	322164	198451	697732
211	fig|11428.3.peg.1785	100226	110245	240084	87558.2	180764	161165		211	fig|11428.3.peg.1785	140470	112944	204221	106068	146487	149880
212	fig|11428.3.peg.5914	260991	522837	788316	258442	120490	576842		212	fig|11428.3.peg.5914	365785	535639	670560	313075	97642.2	536450
213	fig|11428.3.peg.4103	275406	270720	324210	126688	204101	348790		213	fig|11428.3.peg.4103	385989	277349	275781	153469	165398	324367
214	fig|11428.3.peg.4561	165563	325262	282881	630634	492819	298283		214	fig|11428.3.peg.4561	232041	333226	240625	763948	399369	277396
215	fig|1428.368.peg.3333	182691	362298	302439	768052	568845	326610		215	fig|1428.368.peg.3333	256046	371169	257262	930416	460978	303740
216	fig|11428.3.peg.3043	56531.6	164609	177967	154303	154112	53480		216	fig|11428.3.peg.3043	79230.5	168640	151383	186923	124889	49735.2
217	fig|11428.3.peg.5454	93734.5	645247	436020	465939	739791	108108		217	fig|11428.3.peg.5454	131371	661045	370889	564436	599509	100538
218	fig|1428.368.peg.5533	331185	620888	725283	362183	504409	275744		218	fig|1428.368.peg.5533	464165	636090	616943	438747	408761	256436
219	fig|11428.3.peg.2953	9112.56	49970.2	21643.3	42778.8	46296.8	28558.4		219	fig|11428.3.peg.2953	12771.5	51193.7	18410.3	51822	37517.9	26558.7
220	fig|11428.3.peg.2955	360685	382321	599789	348531	559811	589117		220	fig|11428.3.peg.2955	505509	391682	510194	422209	453657	547866
221	fig|11428.3.peg.5221	90491	46520.3	27793.8	48626.8	59634.6	30046.6		221	fig|11428.3.peg.5221	126825	47659.4	23642	58906.3	48326.5	27942.6
222	fig|11428.3.peg.1964	440625	548833	419315	878415	1.47422e+06	1.66137e+06		222	fig|11428.3.peg.1964	617547	562271	356679	1.06411e+06	1.19467e+06	1.54504e+06
223	fig|11428.3.peg.4720	35514.6	6203.26	10676.8	6573.02	6162.42	79934		223	fig|11428.3.peg.4720	49774.6	6355.15	9081.97	7962.53	4993.88	74336.8
224	fig|11428.3.peg.4910	81493.8	266842	243599	306381	432947	157768		224	fig|11428.3.peg.4910	114216	273376	207211	371148	350850	146721
225	fig|11428.3.peg.1679	30494.3	70525.2	103896	33688.4	154524	150316		225	fig|11428.3.peg.1679	42738.6	72252.1	88376.3	40810	125222	139791
226	fig|11428.3.peg.1200	40945.9	88987.6	85648.3	79700.4	73201.1	50417.3		226	fig|11428.3.peg.1200	57386.8	91166.5	72854.5	96548.8	59320.4	46887
227	fig|11428.3.peg.5224	53958.3	67446.3	48314.5	40624.1	105987	107171		227	fig|11428.3.peg.5224	75624	69097.7	41097.5	49211.9	85889.1	99666.6
228	fig|11428.3.peg.5125	147442	112837	311231	56675.4	186160	278713		228	fig|11428.3.peg.5125	206644	115600	264741	68656.4	150860	259197
229	fig|11428.3.peg.1941	4756.98	15162.7	26624.8	11320.8	20373.1	15630.3		229	fig|11428.3.peg.1941	6667.02	15534	22647.6	13714	16509.9	14535.9
230	fig|11428.3.peg.3233	201468	489479	682531	348279	515162	437360		230	fig|11428.3.peg.3233	282362	501464	580577	421904	417475	406735
231	fig|11428.3.peg.4477	110478	212028	267932	289577	242358	136333		231	fig|11428.3.peg.4477	154837	217219	227909	350793	196401	126787
232	fig|11428.3.peg.5056	287353	250399	129905	178670	166960	125648		232	fig|11428.3.peg.5056	402733	256530	110500	216440	135300	116850
233	fig|11428.3.peg.1530	55634.4	78529.7	32319.4	144688	221227	213657		233	fig|11428.3.peg.1530	77973	80452.5	27491.7	175274	179277	198696
234	fig|11428.3.peg.108	162298	75071	192280	131798	228095	227601		234	fig|11428.3.peg.108	227465	76909.1	163558	159659	184843	211664
235	fig|11428.3.peg.4173	332606	257534	369793	123528	182305	364962		235	fig|11428.3.peg.4173	466156	263839	314554	149641	147736	339406
236	fig|11428.3.peg.1956	84193.9	132117	157777	100534	100367	85692.9		236	fig|11428.3.peg.1956	118000	135352	134209	121786	81335	79692.5
237	fig|11428.3.peg.4228	535345	236818	644255	268469	274570	424268		237	fig|11428.3.peg.4228	750300	242617	548019	325222	222505	394560
238	fig|11428.3.peg.4	5.7169e+06	1.4042e+07	1.11619e+07	9.2188e+06	2.94666e+07	1.65009e+07		238	fig|11428.3.peg.4	8.01239e+06	1.43858e+07	9.49461e+06	1.11676e+07	2.3879e+07	1.53455e+07
239	fig|11428.3.peg.524	284661	138448	177990	112974	103471	85717.3		239	fig|11428.3.peg.524	398960	141838	151403	136857	83850.1	79715.1
240	fig|11428.3.peg.3802	333860	605324	698913	469900	1.33561e+06	224795		240	fig|11428.3.peg.3802	467913	620145	594512	569235	1.08235e+06	209054
241	fig|11428.3.peg.1456	194742	1.59183e+06	1.42314e+06	1.59395e+06	2.1803e+06	1.13123e+06		241	fig|11428.3.peg.1456	272935	1.63081e+06	1.21056e+06	1.9309e+06	1.76686e+06	1.05202e+06
242	fig|1428.368.peg.6219	14720.7	44291.9	13278.3	57663.8	57991	26066.4		242	fig|1428.368.peg.6219	20631.4	45376.3	11294.9	69853.7	46994.5	24241.1
243	fig|11428.3.peg.2711	11430.6	23328.9	5853.26	28782.1	46367.3	42172.9		243	fig|11428.3.peg.2711	16020.2	23900.1	4978.92	34866.6	37575	39219.8
244	fig|1428.368.peg.6322	7532.91	55051.8	15962.7	36459	35152.7	14384.1		244	fig|1428.368.peg.6322	10557.6	56399.8	13578.2	44166.3	28486.9	13376.9
245	fig|11428.3.peg.1670	25355.1	135612	32236.9	11046.6	20390	22163.7		245	fig|11428.3.peg.1670	35535.9	138932	27421.4	13381.8	16523.6	20611.7
246	fig|11428.3.peg.5480	109614	261558	160584	179260	329294	123412		246	fig|11428.3.peg.5480	153627	267962	136597	217155	266852	114770
247	fig|11428.3.peg.27	86690.6	57112.3	176938	74379.9	139313	29911.9		247	fig|11428.3.peg.27	121499	58510.7	150507	90103.6	112896	27817.4
248	fig|11428.3.peg.3247	198266	27282.8	367345	107146	62642	259611		248	fig|11428.3.peg.3247	277875	27950.8	312472	129796	50763.6	241432
249	fig|11428.3.peg.5069	2077.9	8905.64	891.737	5697.17	14559.2	681.933		249	fig|11428.3.peg.5069	2912.23	9123.69	758.532	6901.54	11798.4	634.183
250	fig|11428.3.peg.1343	33380.4	105936	41279	43733.4	154522	13599.3		250	fig|11428.3.peg.1343	46783.5	108529	35112.9	52978.5	125221	12647
251	fig|11428.3.peg.6079	21682.2	103941	22578.6	75615	55399.8	25195.1		251	fig|11428.3.peg.6079	30388.1	106486	19205.9	91599.7	44894.7	23430.9
252	fig|11428.3.peg.4563	7928.07	17092.9	6749.54	18719.1	8469	4375.24		252	fig|11428.3.peg.4563	11111.4	17511.4	5741.32	22676.2	6863.07	4068.87
253	fig|11428.3.peg.3861	30549.7	59724	21762.7	29465.2	34362.8	13974.4		253	fig|11428.3.peg.3861	42816.2	61186.3	18511.9	35694	27846.8	12995.9
254	fig|11428.3.peg.4494	199048	688842	180010	532616	682354	154178		254	fig|11428.3.peg.4494	278970	705708	153121	645209	552963	143382
255	fig|1428.368.peg.6327	11288.9	9360.57	20393.1	9277.38	80972.5	26884.7		255	fig|1428.368.peg.6327	15821.7	9589.77	17346.8	11238.6	65618.2	25002.2
256	fig|11428.3.peg.3	191969	318454	400028	668862	820101	249178		256	fig|11428.3.peg.3	269050	326251	340273	810257	664591	231730
257	fig|1428.368.peg.6144	312840	365912	625749	269872	333464	328262		257	fig|1428.368.peg.6144	438453	374872	532276	326922	270231	305277
258	fig|11428.3.peg.5182	91770.4	64153.3	131142	56840.2	117654	115908		258	fig|11428.3.peg.5182	128619	65724.1	111553	68856	95344.2	107792
259	fig|11428.3.peg.2316	51534.6	69322.9	107501	174385	108059	47141.1		259	fig|11428.3.peg.2316	72227	71020.3	91442.6	211249	87568.6	43840.2
260	fig|11428.3.peg.2989	16645.9	12303	15213.9	13470.7	47732.9	37313.8		260	fig|11428.3.peg.2989	23329.6	12604.3	12941.3	16318.4	38681.6	34701
261	fig|11428.3.peg.2567	565591	582529	744051	565343	435080	377577		261	fig|11428.3.peg.2567	792690	596792	632907	684854	352578	351138
262	fig|11428.3.peg.5299	360093	515651	625760	420484	604076	445886		262	fig|11428.3.peg.5299	504679	528276	532286	509373	489529	414664
263	fig|11428.3.peg.4697	204136	157721	170545	128318	126487	196485		263	fig|11428.3.peg.4697	286102	161583	145069	155444	102502	182726
264	fig|11428.3.peg.5310	1545.23	10896.7	2717.46	57299.4	17102	529.941		264	fig|11428.3.peg.5310	2165.68	11163.5	2311.53	69412.3	13859	492.833
265	fig|11428.3.peg.5245	27219.3	380150	23311.6	44189.7	330520	29413.3		265	fig|11428.3.peg.5245	38148.6	389458	19829.4	53531.2	267845	27353.7
266	fig|11428.3.peg.2848	132938	313033	124685	221262	245922	79635.5		266	fig|11428.3.peg.2848	186316	320698	106060	268036	199289	74059.2
267	fig|11428.3.peg.5931	56899.9	7737.87	24260.8	13240.6	4527.04	74745.4		267	fig|11428.3.peg.5931	79746.7	7927.33	20636.8	16039.6	3668.61	69511.5
268	fig|11428.3.peg.4550	566866	320569	543743	336071	340361	314719		268	fig|11428.3.peg.4550	794477	328418	462521	407115	275821	292682
269	fig|11428.3.peg.570	4336.28	5404.62	11885.1	4531.07	5962.11	3380.68		269	fig|11428.3.peg.570	6077.41	5536.95	10109.8	5488.92	4831.56	3143.96
270	fig|11428.3.peg.1168	81622.7	66032.8	81818.3	42839.9	62515	168353		270	fig|11428.3.peg.1168	114396	67649.6	69596.5	51896.1	50660.6	156564
271	fig|1428.368.peg.6151	212940	192319	135582	199066	379798	408128		271	fig|1428.368.peg.6151	298440	197027	115330	241147	307779	379550
272	fig|11428.3.peg.1862	1.10779e+06	655092	1.39402e+06	673711	962244	1.10119e+06		272	fig|11428.3.peg.1862	1.5526e+06	671132	1.18578e+06	816131	779780	1.02408e+06
273	fig|11428.3.peg.5059	761780	1.38375e+06	733375	834084	1.21069e+06	1.12638e+06		273	fig|11428.3.peg.5059	1.06765e+06	1.41763e+06	623826	1.01041e+06	981114	1.04751e+06
274	fig|11428.3.peg.651	8077.35	86315	11234.9	61440.5	87286.2	27873.1		274	fig|11428.3.peg.651	11320.6	88428.4	9556.68	74428.9	70734.6	25921.4
275	fig|1428.368.peg.3939	11333.8	9659.09	5624.51	4319.94	37544.5	11115.5		275	fig|1428.368.peg.3939	15884.7	9895.6	4784.34	5233.16	30425.2	10337.2
276	fig|11428.3.peg.4628	29687.4	113193	85208.8	124242	119940	132925		276	fig|11428.3.peg.4628	41607.6	115964	72480.6	150507	97196.4	123617
277	fig|11428.3.peg.3291	42516.5	28953.4	79391.9	9293.92	21278.4	28359.8		277	fig|11428.3.peg.3291	59587.9	29662.3	67532.6	11258.6	17243.5	26374
278	fig|11428.3.peg.4175	37050.6	40363.4	25612.8	17732	38009.1	27618		278	fig|11428.3.peg.4175	51927.4	41351.7	21786.9	21480.5	30801.7	25684.1
279	fig|11428.3.peg.1987	11725.5	67469.7	14264.2	33862.6	9984.54	27907		279	fig|11428.3.peg.1987	16433.5	69121.7	12133.5	41021	8091.23	25952.9
280	fig|1428.368.peg.6313	7723.67	29222.8	29783.6	20773.6	35639.9	2608.04		280	fig|1428.368.peg.6313	10824.9	29938.4	25334.6	25165.1	28881.7	2425.41
281	fig|11428.3.peg.3234	203745	634291	513744	585125	778420	196287		281	fig|11428.3.peg.3234	285553	649821	437003	708818	630813	182542
282	fig|11428.3.peg.2212	164493	384213	227680	288329	344717	216893		282	fig|11428.3.peg.2212	230541	393621	193670	349281	279351	201705
283	fig|11428.3.peg.4171	395793	586190	453778	166579	246178	195590		283	fig|11428.3.peg.4171	554714	600543	385994	201793	199497	181894
284	fig|11428.3.peg.2074	104398	74176.6	158581	50096.9	106992	272395		284	fig|11428.3.peg.2074	146316	75992.8	134893	60687.2	86703.5	253321
285	fig|11428.3.peg.3816	54371	32292.9	48024.5	17045.4	30725.8	119032		285	fig|11428.3.peg.3816	76202.4	33083.6	40850.8	20648.7	24899.5	110697
286	fig|1428.368.peg.3917	63159.5	83836.5	122389	29515.1	16655.4	82111		286	fig|1428.368.peg.3917	88519.7	85889.3	104107	35754.5	13497.2	76361.3
287	fig|11428.3.peg.2673	101007	42265.3	71277.7	60941.3	101050	132797		287	fig|11428.3.peg.2673	141564	43300.2	60630.5	73824.1	81888.8	123498
288	fig|1428.368.peg.5224	62211.2	46020.3	39447.7	81172.7	74893.1	379144		288	fig|1428.368.peg.5224	87190.6	47147.1	33555.1	98332.3	60691.6	352596
289	fig|11428.3.peg.3470	86107.6	52987	79881.6	18777.9	43644.1	76540.4		289	fig|11428.3.peg.3470	120682	54284.4	67949.1	22747.5	35368.1	71180.8
290	fig|11428.3.peg.5753	66253.2	194304	102201	175626	279254	88018.8		290	fig|11428.3.peg.5753	92855.6	199061	86934.9	212752	226301	81855.5
291	fig|11428.3.peg.2660	34083.7	94993.1	68872.4	91136.8	66613.3	64446.2		291	fig|11428.3.peg.2660	47769.2	97319	58584.5	110403	53981.8	59933.5
292	fig|11428.3.peg.2071	38915.7	247810	223754	61589.2	140478	24550		292	fig|11428.3.peg.2071	54541.4	253877	190330	74609	113840	22831
293	fig|11428.3.peg.1938	174487	419630	198258	313214	642953	227709		293	fig|11428.3.peg.1938	244547	429905	168643	379426	521034	211765
294	fig|1428.368.peg.3890	15097.7	25686.4	2736.21	6289.17	4729.11	12407.6		294	fig|1428.368.peg.3890	21159.8	26315.4	2327.48	7618.68	3832.36	11538.8
295	fig|11428.3.peg.5912	26007.7	153575	16645.9	97833.9	361965	76573.6		295	fig|11428.3.peg.5912	36450.4	157335	14159.4	118516	293328	71211.7
296	fig|11428.3.peg.6028	15329	24763.7	16354.4	57486.9	66777.4	45276		296	fig|11428.3.peg.6028	21484	25370	13911.5	69639.4	54114.8	42105.6
297	fig|11428.3.peg.3169	11941.3	223543	52302.3	14492.9	86243.4	436482		297	fig|11428.3.peg.3169	16736	229016	44489.6	17556.7	69889.6	405919
298	fig|11428.3.peg.235	15297.7	32193	7854.9	3925.38	10236.9	19854.4		298	fig|11428.3.peg.235	21440.1	32981.3	6681.56	4755.19	8295.7	18464.1
299	fig|11428.3.peg.3148	7015.94	28705.9	2863.5	20945.6	28462.5	9758.06		299	fig|11428.3.peg.3148	9833.02	29408.8	2435.76	25373.4	23065.3	9074.77
300	fig|11428.3.peg.5205	32219	86448.6	31500	92095.5	238472	142678		300	fig|11428.3.peg.5205	45155.7	88565.3	26794.6	111564	193252	132688
301	fig|11428.3.peg.4215	14141.6	14763.8	17853.9	15205.8	35433.5	50586		301	fig|11428.3.peg.4215	19819.8	15125.3	15186.9	18420.2	28714.5	47043.9
302	fig|11428.3.peg.1116	41604.1	57206.3	68078	71305.2	117687	283273		302	fig|11428.3.peg.1116	58309.2	58607	57908.7	86378.8	95370.7	263438
303	fig|11428.3.peg.4219	14835.8	32632.2	16973.6	21942.6	69239.7	46679.2		303	fig|11428.3.peg.4219	20792.7	33431.2	14438.1	26581.2	56110.2	43410.6
304	fig|11428.3.peg.2143	67325.1	62017.4	50865.2	23771	91705.3	28290.7		304	fig|11428.3.peg.2143	94357.9	63535.9	43267.1	28796.1	74315.8	26309.7
305	fig|11428.3.peg.2902	82553	64675	91181.8	106027	195730	229369		305	fig|11428.3.peg.2902	115700	66258.6	77561.3	128441	158615	213308
306	fig|11428.3.peg.71	115471	86331.9	820584	74833	648629	68021.4		306	fig|11428.3.peg.71	161835	88445.7	698008	90652.5	525633	63258.4
307	fig|1428.368.peg.3122	4928.47	17039.8	2950.17	24404.8	25994.5	5812.29		307	fig|1428.368.peg.3122	6907.37	17457	2509.49	29563.9	21065.3	5405.3
308	fig|11428.3.peg.2776	32711.4	117382	106853	86045.5	123957	55258.4		308	fig|11428.3.peg.2776	45845.9	120256	90891.8	104235	100452	51389.1
309	fig|11428.3.peg.5749	11092.2	1006.54	3211.82	8206.44	20044.4	7080.04		309	fig|11428.3.peg.5749	15545.9	1031.19	2732.05	9941.25	16243.5	6584.28
310	fig|11428.3.peg.787	217418	502540	502767	352648	631951	430863		310	fig|11428.3.peg.787	304716	514844	427666	427196	512118	400693
311	fig|11428.3.peg.1826	12423.4	1969.41	22049.5	5341.21	16802.8	19273.6		311	fig|11428.3.peg.1826	17411.7	2017.63	18755.8	6470.32	13616.6	17924
312	fig|1428.368.peg.6305	6501.81	5690.82	5789.94	7557.97	19247.1	9033.94		312	fig|1428.368.peg.6305	9112.46	5830.16	4925.05	9155.7	15597.4	8401.36
313	fig|11428.3.peg.3202	47748.9	32028.8	94318.5	56829.3	96451.6	74502.5		313	fig|11428.3.peg.3202	66921.2	32813.1	80229.5	68842.8	78162.1	69285.6
314	fig|11428.3.peg.3380	135187	82128.2	160136	327426	445081	208405		314	fig|11428.3.peg.3380	189468	84139.2	136216	396643	360683	193812
315	fig|11428.3.peg.3614	2932.1	62648.1	5933.18	46708.2	36072.9	7988.5		315	fig|11428.3.peg.3614	4109.41	64182	5046.9	56582.2	29232.6	7429.12
316	fig|11428.3.peg.1972	102523	298250	181402	164126	404318	210405		316	fig|11428.3.peg.1972	143688	305553	154305	198821	327650	195672
317	fig|11428.3.peg.6020	241397	610373	372319	276257	212335	183480		317	fig|11428.3.peg.6020	338323	625318	316703	334657	172071	170632
318	fig|11428.3.peg.1705	3926.54	2942.64	1894.17	6839.05	8442.32	21772.7		318	fig|11428.3.peg.1705	5503.14	3014.69	1611.23	8284.81	6841.45	20248.1
319	fig|11428.3.peg.947	717124	353566	685982	259060	294048	836021		319	fig|11428.3.peg.947	1.00507e+06	362223	583512	313824	238290	777481
320	fig|1428.368.peg.4320	44392.1	72707.7	51374.2	61997.4	79545.1	137108		320	fig|1428.368.peg.4320	62216.6	74488	43700.1	75103.4	64461.5	127507
321	fig|11428.3.peg.4549	17500.2	14511.9	21774.7	11024.5	20222.2	32786.2		321	fig|11428.3.peg.4549	24527	14867.2	18522.1	13355	16387.6	30490.5
322	fig|11428.3.peg.4476	56610.5	87020.4	82089.6	69426.1	94849	109648		322	fig|11428.3.peg.4476	79341.1	89151.1	69827.3	84102.5	76863.4	101970
323	fig|11428.3.peg.3755	109741	85923.1	228431	148649	122000	312590		323	fig|11428.3.peg.3755	153805	88026.9	194309	180073	98865.8	290701
324	fig|11428.3.peg.3127	269288	595396	632167	486197	496670	281142		324	fig|11428.3.peg.3127	377414	609974	537736	588978	402490	261456
325	fig|1428.368.peg.3417	233293	171249	345151	149408	140801	416738		325	fig|1428.368.peg.3417	326965	175442	293593	180992	114102	387557
326	fig|11428.3.peg.5078	3984.92	23863.3	9456.67	38204.9	10739.3	3922.43		326	fig|11428.3.peg.5078	5584.97	24447.6	8044.07	46281.3	8702.85	3647.77
327	fig|11428.3.peg.5623	587124	388355	693152	169778	302319	686839		327	fig|11428.3.peg.5623	822870	397863	589611	205668	244992	638745
328	fig|11428.3.peg.1469	5.50522e+06	110882	5.92889e+06	39548.4	33245.2	1.58194e+06		328	fig|11428.3.peg.1469	7.71571e+06	113597	5.04325e+06	47908.8	26941.1	1.47117e+06
329	fig|11428.3.peg.3829	53061.6	46856.7	30585	40740	132176	118662		329	fig|11428.3.peg.3829	74367.2	48004	26016.3	49352.2	107112	110353
330	fig|11428.3.peg.2	79314.4	89071.2	73050.8	85580.8	198676	209221		330	fig|11428.3.peg.2	111161	91252.1	62138.7	103672	161002	194571
331	fig|11428.3.peg.3195	539033	107621	410906	210894	335609	911287		331	fig|11428.3.peg.3195	755468	110256	349526	255477	271970	847477
332	fig|1428.368.peg.4545	495173	521571	883541	92067.5	298206	449754		332	fig|1428.368.peg.4545	693998	534342	751561	111530	241659	418261
333	fig|1428.368.peg.4921	9421.24	193706	131246	139518	201921	87856		333	fig|1428.368.peg.4921	13204.1	198449	111641	169012	163632	81704.1
334	fig|11428.3.peg.1274	195208	573732	309996	224968	497542	360291		334	fig|11428.3.peg.1274	273589	587780	263689	272525	403197	335062
335	fig|11428.3.peg.2860	410038	590783	729280	142400	227000	210905		335	fig|11428.3.peg.2860	574678	605248	620342	172503	183955	196137
336	fig|11428.3.peg.5709	676352	586571	861194	761311	798222	1.18682e+06		336	fig|11428.3.peg.5709	947925	600934	732552	922249	646860	1.10371e+06
337	fig|11428.3.peg.1287	12097.3	22196.7	13474.4	7216.37	12034.5	6237.1		337	fig|11428.3.peg.1287	16954.7	22740.2	11461.7	8741.89	9752.49	5800.36
338	fig|1428.368.peg.3868	21000.6	13446.6	15431.1	4899.86	4689.42	18084.5		338	fig|1428.368.peg.3868	29432.9	13775.9	13126	5935.68	3800.19	16818.1
339	fig|11428.3.peg.960	20921.4	48054.7	13640.5	96331.3	46576.3	35034.1		339	fig|11428.3.peg.960	29321.8	49231.4	11602.9	116695	37744.3	32580.9
340	fig|11428.3.peg.4916	2384.81	3955.61	3152.46	9291.25	25423.5	5232.17		340	fig|11428.3.peg.4916	3342.37	4052.46	2681.55	11255.4	20602.6	4865.8
341	fig|11428.3.peg.2612	58005.6	100799	72524.5	230714	608519	280753		341	fig|11428.3.peg.2612	81296.3	103267	61691	279486	493130	261094
342	fig|11428.3.peg.1038	15104.5	100254	48044	88780.7	186799	51421.8		342	fig|11428.3.peg.1038	21169.3	102709	40867.4	107549	151377	47821.1
343	fig|1428.368.peg.6133	13510.2	2851.69	9769.58	2360	2206.32	13388.9		343	fig|1428.368.peg.6133	18934.9	2921.52	8310.24	2858.9	1787.95	12451.4
344	fig|1428.368.peg.3416	75967.7	96916.9	156436	162490	128475	164977		344	fig|1428.368.peg.3416	106471	99289.9	133068	196839	104113	153425
345	fig|11428.3.peg.958	54495.1	144218	89058.4	374154	795350	269855		345	fig|11428.3.peg.958	76376.3	147749	75755.1	453249	644533	250959
346	fig|11428.3.peg.3217	149374	291476	334432	206510	334263	341928		346	fig|11428.3.peg.3217	209351	298612	284476	250165	270879	317985
347	fig|11428.3.peg.5737	436117	155193	372918	195591	305039	733348		347	fig|11428.3.peg.5737	611228	158993	317212	236939	247196	681997
348	fig|11428.3.peg.3139	23143.5	27596.7	26872.6	14195.1	19509.4	38825.6		348	fig|11428.3.peg.3139	32436.2	28272.5	22858.4	17195.9	15810	36106.9
349	fig|11428.3.peg.3643	125201	107151	89222.7	175877	88560.8	182694		349	fig|11428.3.peg.3643	175473	109774	75894.9	213057	71767.6	169902
350	fig|11428.3.peg.3028	84771.2	82111.7	102111	134397	215334	216038		350	fig|11428.3.peg.3028	118809	84122.2	86858.3	162808	174502	200911
351	fig|11428.3.peg.845	19350.8	107652	27850.1	100582	94759	23141.2		351	fig|11428.3.peg.845	27120.7	110288	23690	121845	76790.4	21520.8
352	fig|11428.3.peg.5223	787962	1.85739e+06	1.32601e+06	679971	1.60531e+06	1.00174e+06		352	fig|11428.3.peg.5223	1.10435e+06	1.90287e+06	1.12794e+06	823715	1.30091e+06	931599
353	fig|11428.3.peg.1554	151335	76348.8	127415	53167.6	38149.7	121064		353	fig|11428.3.peg.1554	212100	78218.2	108383	64407.1	30915.6	112587
354	fig|1428.368.peg.5192	3413.61	16798.2	12947.3	50004	41836.6	17343.9		354	fig|1428.368.peg.5192	4784.26	17209.5	11013.3	60574.7	33903.4	16129.4
355	fig|11428.3.peg.3810	230589	87962.4	374386	146526	189227	433204		355	fig|11428.3.peg.3810	323177	90116.2	318462	177502	153345	402870
356	fig|11428.3.peg.6102	8051.84	51721.7	19254.6	56947.3	609.848	8892.42		356	fig|11428.3.peg.6102	11284.9	52988.1	16378.5	68985.7	494.207	8269.75
357	fig|1428.368.peg.6102	52535	45664.6	75857.5	72720.2	45730.1	151828		357	fig|1428.368.peg.6102	73629.2	46782.7	64526.1	88092.9	37058.6	141196
358	fig|11428.3.peg.452	47817.9	128578	56858.7	107047	162345	71988.2		358	fig|11428.3.peg.452	67018	131726	48365.3	129676	131561	66947.4
359	fig|1428.368.peg.6385	29555.9	85289.9	6077.47	21413.6	66611.3	67620.7		359	fig|1428.368.peg.6385	41423.4	87378.2	5169.64	25940.4	53980.2	62885.7
360	fig|11428.3.peg.4661	163318	303971	232386	237251	298274	191964		360	fig|11428.3.peg.4661	228894	311414	197673	287405	241714	178522
361	fig|11428.3.peg.3553	1.15578e+06	171643	3.54018e+06	147111	104164	921169		361	fig|11428.3.peg.3553	1.61986e+06	175845	3.01136e+06	178210	84412.2	856667
362	fig|11428.3.peg.981	61647.7	88904.3	83253.4	77576.1	193997	324171		362	fig|11428.3.peg.981	86400.9	91081.1	70817.3	93975.4	157210	301471
363	fig|11428.3.peg.212	2497.32	15880.5	10332.1	46081.4	63555.2	17522.2		363	fig|11428.3.peg.212	3500.06	16269.3	8788.73	55822.8	51503.6	16295.3
364	fig|11428.3.peg.4699	496.062	5498.62	2371.74	1823.72	9386.84	1438.94		364	fig|11428.3.peg.4699	695.244	5633.25	2017.45	2209.24	7606.87	1338.18
365	fig|11428.3.peg.6026	116321	147818	98843	94532.5	227943	142203		365	fig|11428.3.peg.6026	163027	151437	84078.2	114516	184720	132246
366	fig|11428.3.peg.5259	113210	125521	123666	142016	152013	269153		366	fig|11428.3.peg.5259	158667	128594	105193	172037	123187	250307
367	fig|11428.3.peg.1507	6476.03	33106.9	5449.88	24265.1	27343.1	14172.7		367	fig|11428.3.peg.1507	9076.33	33917.5	4635.8	29394.6	22158.2	13180.3
368	fig|11428.3.peg.70	4.37333e+06	670188	1.24287e+07	5.02229e+06	6.07147e+06	3.8404e+06		368	fig|11428.3.peg.70	6.12933e+06	686597	1.05722e+07	6.08398e+06	4.92017e+06	3.57148e+06
369	fig|1428.368.peg.807	18138.9	17143.3	6034.51	14269.9	26976.1	27023.2		369	fig|1428.368.peg.807	25422.2	17563	5133.1	17286.4	21860.8	25130.9
370	fig|11428.3.peg.303	26291.6	110171	30048.3	111113	93080.5	53452		370	fig|11428.3.peg.303	36848.3	112869	25559.8	134602	75430.2	49709.1
371	fig|11428.3.peg.5286	23350.8	21102.3	34129.4	21488.1	44799.4	49843.2		371	fig|11428.3.peg.5286	32726.7	21619	29031.2	26030.6	36304.4	46353.1
372	fig|1428.368.peg.2141	47815.7	25935.4	7454.6	29536.3	49785.9	69626.2		372	fig|1428.368.peg.2141	67014.9	26570.4	6341.06	35780.1	40345.3	64750.8
373	fig|11428.3.peg.2042	83539.7	37126.7	36033.4	45941.7	115789	158599		373	fig|11428.3.peg.2042	117083	38035.8	30650.9	55653.7	93832.7	147494
374	fig|11428.3.peg.5229	6582.09	9343.56	28538.9	20607.9	62365.8	20435		374	fig|11428.3.peg.5229	9224.97	9572.34	24275.9	24964.3	50539.8	19004.1
375	fig|11428.3.peg.2888	414898	277951	452006	322681	763559	617399		375	fig|11428.3.peg.2888	581491	284756	384487	390894	618770	574167
376	fig|11428.3.peg.3500	97053.1	43457.9	160599	75517.6	122322	123567		376	fig|11428.3.peg.3500	136022	44521.9	136609	91481.7	99126.8	114914
377	fig|11428.3.peg.4959	101978	165160	140962	175520	126307	91000.8		377	fig|11428.3.peg.4959	142924	169204	119906	212624	102356	84628.7
378	fig|11428.3.peg.2884	16436.4	10996.1	23047	13164.9	16667	49635.7		378	fig|11428.3.peg.2884	23036	11265.4	19604.3	15948	13506.6	46160.1
379	fig|11428.3.peg.4544	83344.1	45547	68979.9	45839.5	67317.5	180730		379	fig|11428.3.peg.4544	116809	46662.2	58675.9	55529.8	54552.5	168075
380	fig|1428.368.peg.4475	985.904	2123.65	475.193	826.781	3553.57	310.459		380	fig|1428.368.peg.4475	1381.77	2175.64	404.21	1001.56	2879.73	288.72
381	fig|11428.3.peg.2204	22374.6	24855.1	28755.5	51668	79148.5	62424.7		381	fig|11428.3.peg.2204	31358.5	25463.6	24460.1	62590.5	64140.1	58053.6
382	fig|11428.3.peg.5947	30996.4	26835	85555.9	29834.6	33417.9	26775		382	fig|11428.3.peg.5947	43442.2	27492.1	72775.8	36141.6	27081.1	24900.1
383	fig|11428.3.peg.4956	110720	204923	351281	58139.6	5056.48	159407		383	fig|11428.3.peg.4956	155177	209941	298808	70430.1	4097.65	148245
384	fig|11428.3.peg.893	11920.6	17148.9	16771.7	13423.6	32614.4	5350.99		384	fig|11428.3.peg.893	16707	17568.8	14266.4	16261.3	26430	4976.3
385	fig|11428.3.peg.2715	504694	894648	1.00759e+06	688649	1.47226e+06	1.18057e+06		385	fig|11428.3.peg.2715	707342	916554	857083	834227	1.19309e+06	1.0979e+06
386	fig|11428.3.peg.5175	1857.11	3404.59	4314.89	11354.6	7548.94	13698		386	fig|11428.3.peg.5175	2602.79	3487.95	3670.35	13755	6117.48	12738.8
387	fig|11428.3.peg.1854	34484.3	11257.7	5043.45	4435.13	3688.27	48796.3		387	fig|11428.3.peg.1854	48330.7	11533.4	4290.07	5372.7	2988.88	45379.5
388	fig|11428.3.peg.1558	38101.2	92345.3	48272.7	97227.5	70017.4	10770.1		388	fig|11428.3.peg.1558	53399.9	94606.4	41061.9	117781	56740.4	10016
389	fig|11428.3.peg.1754	111182	181524	164031	88712.5	169995	141864		389	fig|11428.3.peg.1754	155824	185969	139529	107466	137760	131930
390	fig|11428.3.peg.535	64830.9	82344.6	57275.1	104517	80239	60588.1		390	fig|11428.3.peg.535	90862.1	84360.8	48719.6	126611	65023.8	56345.5
391	fig|11428.3.peg.458	17595.2	22568.2	8399.18	25682.2	60673.5	57378		391	fig|11428.3.peg.458	24660.1	23120.7	7144.54	31111.4	49168.3	53360.2
392	fig|11428.3.peg.3929	21637	64187.6	50623.8	36571.8	56581.2	10560.9		392	fig|11428.3.peg.3929	30324.8	65759.2	43061.8	44302.9	45852.1	9821.43
393	fig|11428.3.peg.6057	2877.31	7590.84	9921.3	2468.29	6700.96	2802.09		393	fig|11428.3.peg.6057	4032.62	7776.7	8439.29	2990.08	5430.3	2605.88
394	fig|11428.3.peg.2520	35429.5	50952.4	36263.7	14030.8	36742.2	72473.4		394	fig|11428.3.peg.2520	49655.3	52200	30846.8	16996.8	29775	67398.7
395	fig|11428.3.peg.700	265.485	5141.3	21069.5	13770.4	18339.6	1297.29		395	fig|11428.3.peg.700	372.084	5267.19	17922.2	16681.4	14862	1206.45
396	fig|11428.3.peg.2761	7166.07	10070.7	15295.7	5740.61	34313.7	12111.6		396	fig|11428.3.peg.2761	10043.4	10317.2	13010.9	6954.16	27807	11263.5
397	fig|11428.3.peg.1012	175635	285575	243368	366396	367630	253279		397	fig|11428.3.peg.1012	246157	292567	207015	443850	297918	235544
398	fig|11428.3.peg.4673	9015.77	43673.7	89119.5	52373.8	6079.91	17088.1		398	fig|11428.3.peg.4673	12635.8	44743.1	75807.1	63445.5	4927.01	15891.5
399	fig|1428.368.peg.6171	2730.31	11562.5	10803.8	18515.2	26527.4	6604.44		399	fig|1428.368.peg.6171	3826.59	11845.6	9189.92	22429.2	21497.1	6141.98
400	fig|1428.368.peg.622	1267.58	18050.1	9117.48	18397.9	33284.9	3929.03		400	fig|1428.368.peg.622	1776.55	18492	7755.54	22287.2	26973.3	3653.91
401	fig|11428.3.peg.223	64120.5	143322	136894	254039	308686	313136		401	fig|11428.3.peg.223	89866.5	146831	116445	307742	250152	291210
402	fig|11428.3.peg.1467	228619	212998	313685	69363.8	218560	211079		402	fig|11428.3.peg.1467	320416	218214	266828	84027	177116	196299
403	fig|11428.3.peg.543	19230.7	33278	60061.1	36607.6	79061	47869.8		403	fig|11428.3.peg.543	26952.3	34092.8	51089.4	44346.3	64069.1	44517.8
404	fig|11428.3.peg.1860	29994.8	107741	85764.5	109079	135546	43965.6		404	fig|11428.3.peg.1860	42038.5	110379	72953.3	132138	109844	40887
405	fig|11428.3.peg.3196	11019.7	39022.1	19899.7	21184	41678.1	19184		405	fig|11428.3.peg.3196	15444.4	39977.6	16927.1	25662.2	33774.9	17840.7
406	fig|11428.3.peg.1732	5957.62	51189.5	22238.1	96264.1	176549	43397.9		406	fig|11428.3.peg.1732	8349.75	52442.9	18916.2	116614	143071	40359
407	fig|11428.3.peg.998	90992.1	143958	182655	115696	208732	61150.1		407	fig|11428.3.peg.998	127528	147482	155370	140153	169152	56868.2
408	fig|1428.368.peg.2716	13110.4	3105.32	16193.2	8083.11	11260.4	27779.4		408	fig|1428.368.peg.2716	18374.6	3181.36	13774.3	9791.85	9125.2	25834.2
409	fig|11428.3.peg.1150	17298	8784.2	1381.54	9029.79	2812.52	21481.3		409	fig|11428.3.peg.1150	24243.6	8999.28	1175.17	10938.7	2279.2	19977.1
410	fig|11428.3.peg.3616	9732.61	19188.4	14228.4	50168.9	80383.2	37752.4		410	fig|11428.3.peg.3616	13640.5	19658.2	12103	60774.4	65140.7	35108.9
411	fig|11428.3.peg.917	2579.52	3786.24	20215.7	7738.28	14287.1	12672.9		411	fig|11428.3.peg.917	3615.26	3878.94	17195.9	9374.12	11577.9	11785.5
412	fig|1428.368.peg.3851	9154.16	69966.4	4379.17	52484.7	97209.5	9507.39		412	fig|1428.368.peg.3851	12829.8	71679.5	3725.02	63579.8	78776.3	8841.66
413	fig|11428.3.peg.2319	456646	798804	431185	601789	1.01066e+06	851726		413	fig|11428.3.peg.2319	640001	818363	366776	729005	819013	792086
414	fig|11428.3.peg.4484	90306.4	85005.2	282345	31127.9	83610.8	83795.2		414	fig|11428.3.peg.4484	126567	87086.6	240170	37708.3	67756.2	77927.6
415	fig|11428.3.peg.5077	35968.9	501572	55534.9	390582	158228	89824.1		415	fig|11428.3.peg.5077	50411.3	513853	47239.3	473150	128225	83534.4
416	fig|11428.3.peg.1285	11841.8	14299.4	70549	19781.8	14094.7	29363.1		416	fig|11428.3.peg.1285	16596.6	14649.5	60010.6	23963.6	11422	27307
417	fig|11428.3.peg.1427	122180	426051	438929	429026	372571	214531		417	fig|11428.3.peg.1427	171239	436483	373363	519720	301923	199509
418	fig|1428.368.peg.5668	100158	27456.1	26797.9	25773.2	16034	70353.6		418	fig|1428.368.peg.5668	140375	28128.4	22795	31221.6	12993.5	65427.3
419	fig|11428.3.peg.1992	99578.7	180719	192546	24541.6	95155.3	143850		419	fig|11428.3.peg.1992	139562	185144	163784	29729.6	77111.6	133777
420	fig|1428.368.peg.3552	59035.1	78631.2	135598	50767.4	14555.3	83826.3		420	fig|1428.368.peg.3552	82739.2	80556.4	115343	61499.4	11795.2	77956.6
421	fig|11428.3.peg.2236	42021.2	27340.4	72332.1	19399.5	115086	30535.1		421	fig|11428.3.peg.2236	58893.8	28009.9	61527.4	23500.5	93263	28397
422	fig|11428.3.peg.1397	61910.5	47892.7	63419.8	24809.8	44052.4	118039		422	fig|11428.3.peg.1397	86769.1	49065.3	53946.3	30054.5	35699	109774
423	fig|11428.3.peg.3460	32941	44472.9	40359.5	43180.9	15579.6	26218.6		423	fig|11428.3.peg.3460	46167.6	45561.8	34330.7	52309.2	12625.4	24382.7
424	fig|1428.368.peg.3929	62821.4	176005	112743	156007	540986	377233		424	fig|1428.368.peg.3929	88045.8	180314	95902.2	188986	438402	350818
425	fig|1428.368.peg.2255	217588	506563	239588	119894	72001.1	110880		425	fig|1428.368.peg.2255	304954	518966	203799	145239	58348	103116
426	fig|11428.3.peg.4667	107606	262712	243917	108163	141017	214177		426	fig|11428.3.peg.4667	150812	269145	207482	131028	114277	199180
427	fig|11428.3.peg.361	1669.42	6357.85	1972.53	6265.77	6691.72	618.113		427	fig|11428.3.peg.361	2339.73	6513.52	1677.88	7590.33	5422.81	574.831
428	fig|11428.3.peg.4757	40595	59498.1	65313.5	18123.1	31684.3	17218.4		428	fig|11428.3.peg.4757	56894.9	60954.9	55557.2	21954.3	25676.2	16012.8
429	fig|11428.3.peg.2867	11918.4	41549	14489.6	23460.8	41108.8	10812.2		429	fig|11428.3.peg.2867	16704	42566.3	12325.2	28420.3	33313.6	10055.1
430	fig|11428.3.peg.5179	85806.8	70193.4	120083	33224.2	93421.6	107079		430	fig|11428.3.peg.5179	120260	71912.1	102145	40247.6	75706.6	99580.6
431	fig|1428.368.peg.4740	73698.8	34561.9	55224.4	19643.5	41518.8	56711.5		431	fig|1428.368.peg.4740	103291	35408.1	46975.2	23796.1	33645.9	52740.4
432	fig|11428.3.peg.141	27343.4	4581.89	9006.71	475.274	4403.34	30104.1		432	fig|11428.3.peg.141	38322.5	4694.08	7661.32	575.746	3568.36	27996.1
433	fig|11428.3.peg.1978	33234.5	53713.5	21275.5	29919.2	16397.6	22133.4		433	fig|11428.3.peg.1978	46579.1	55028.7	18097.5	36244.1	13288.2	20583.5
434	fig|11428.3.peg.3302	18730.4	38471.6	54174.1	50296.6	57200.3	43209.1		434	fig|11428.3.peg.3302	26251.2	39413.5	46081.7	60929.1	46353.7	40183.5
435	fig|11428.3.peg.3401	56006	99497.7	97339.3	12784.8	84696.2	65559.7		435	fig|11428.3.peg.3401	78493.8	101934	82799	15487.5	68635.8	60969.1
436	fig|11428.3.peg.4779	928.041	23716.2	16078.5	17526.6	28492.8	2114.6		436	fig|11428.3.peg.4779	1300.67	24296.9	13676.7	21231.6	23089.9	1966.53
437	fig|11428.3.peg.4357	4798.26	3975.29	3540.95	9836.4	13591.3	3049.7		437	fig|11428.3.peg.4357	6724.89	4072.63	3012.01	11915.8	11014.1	2836.15
438	fig|11428.3.peg.1419	5186.53	47628.4	4262.34	18190.8	52597.6	1600.96		438	fig|11428.3.peg.1419	7269.05	48794.6	3625.65	22036.3	42623.9	1488.85
439	fig|11428.3.peg.6114	41211.5	13043.2	17104.5	3430.93	11806.8	34243.3		439	fig|11428.3.peg.6114	57758.9	13362.6	14549.5	4156.22	9567.94	31845.5
440	fig|11428.3.peg.258	36036.3	53335.5	75240.8	20906.7	106456	28999.4		440	fig|11428.3.peg.258	50505.7	54641.4	64001.6	25326.3	86269.5	26968.8
441	fig|11428.3.peg.3243	80895.3	59464.5	36737	63853.9	104700	79489.6		441	fig|11428.3.peg.3243	113377	60920.5	31249.4	77352.4	84846.4	73923.5
442	fig|11428.3.peg.4179	58915	7086.86	95975.6	41503.8	60281.4	294062		442	fig|11428.3.peg.4179	82570.8	7260.39	81639.1	50277.5	48850.6	273471
443	fig|11428.3.peg.6126	14571.3	6606.48	15553.8	27816.6	51120.8	72581.3		443	fig|11428.3.peg.6126	20422	6768.23	13230.4	33696.9	41427.1	67499
444	fig|11428.3.peg.2936	7740.33	24662.2	22503.6	39773.9	67273.6	7424.62		444	fig|11428.3.peg.2936	10848.3	25266	19142.1	48182	54516.9	6904.73
445	fig|11428.3.peg.2100	43918.9	37681.8	13903.3	5942.43	6347.49	47123.1		445	fig|11428.3.peg.2100	61553.4	38604.4	11826.5	7198.63	5143.86	43823.4
446	fig|11428.3.peg.479	90484.2	72491.4	115336	78249.4	172006	172891		446	fig|11428.3.peg.479	126816	74266.3	98107.9	94791.1	139390	160785
447	fig|11428.3.peg.3539	79279	42297.2	92926	22145.4	83631	204308		447	fig|11428.3.peg.3539	111112	43332.9	79045	26826.8	67772.6	190002
448	fig|11428.3.peg.351	103436	170748	193489	150339	212702	132236		448	fig|11428.3.peg.351	144968	174929	164586	182121	172369	122976
449	fig|11428.3.peg.4529	42605.7	5337.58	56509	5056.13	3255.48	26435.8		449	fig|11428.3.peg.4529	59713	5468.27	48067.8	6124.98	2638.17	24584.7
450	fig|1428.368.peg.5112	17053.2	35724.4	22850.1	10055.1	13343.5	95118.2		450	fig|1428.368.peg.5112	23900.5	36599.1	19436.8	12180.8	10813.2	88457.7
451	fig|11428.3.peg.509	496.68	25513.6	1222.54	4457.95	12687.8	3853.42		451	fig|11428.3.peg.509	696.11	26138.3	1039.92	5400.34	10281.9	3583.6
452	fig|11428.3.peg.953	1636.7	28761.4	24225.9	27587.8	77104.1	180.371		452	fig|11428.3.peg.953	2293.88	29465.6	20607.1	33419.8	62483.3	167.741
453	fig|11428.3.peg.644	29194.4	2429.1	7599.54	911.093	1807.67	56025.2		453	fig|11428.3.peg.644	40916.8	2488.58	6464.34	1103.7	1464.9	52102.2
454	fig|11428.3.peg.137	217678	330609	367890	276503	451977	293916		454	fig|11428.3.peg.137	305081	338704	312936	334955	366271	273335
455	fig|11428.3.peg.2013	14365.3	24607.6	18584.5	2985	3284.63	23194.5		455	fig|11428.3.peg.2013	20133.4	25210.1	15808.4	3616.02	2661.79	21570.3
456	fig|11428.3.peg.6024	13488.4	78924.5	24378.7	18444.1	36173.5	21154.4		456	fig|11428.3.peg.6024	18904.3	80856.9	20737.1	22343.2	29314.2	19673.2
457	fig|11428.3.peg.833	95868.3	74545.9	57433.7	63010.5	262449	147653		457	fig|11428.3.peg.833	134362	76371.1	48854.4	76330.8	212682	137314
458	fig|11428.3.peg.5522	81456.3	94396.2	81123.9	42183.7	140725	107244		458	fig|11428.3.peg.5522	114163	96707.5	69005.9	51101.2	114040	99734.3
459	fig|11428.3.peg.4527	17925.6	2153.63	20610.7	11021	14599.5	40048.2		459	fig|11428.3.peg.4527	25123.2	2206.36	17532	13350.8	11831.1	37243.9
460	fig|11428.3.peg.5211	38706.3	80392.2	76440.5	106282	180687	144787		460	fig|11428.3.peg.5211	54247.9	82360.6	65022.1	128750	146424	134649
461	fig|11428.3.peg.2010	58729.4	252779	234684	203026	255675	103587		461	fig|11428.3.peg.2010	82310.7	258968	199628	245945	207193	96333.5
462	fig|11428.3.peg.2945	173259	27452.5	314962	10667.1	835012	315470		462	fig|11428.3.peg.2945	242827	28124.7	267914	12922	676674	293380
463	fig|11428.3.peg.1208	22954.3	22865.5	37185.4	38161.1	50223.3	29633.9		463	fig|11428.3.peg.1208	32171.1	23425.3	31630.8	46228.2	40699.8	27558.9
464	fig|1428.368.peg.4752	34416.6	157602	180324	248374	272838	130059		464	fig|1428.368.peg.4752	48235.8	161461	153388	300880	221102	120952
465	fig|1428.368.peg.6386	5277.11	22049.5	11202.3	9542.55	12770.9	12601.1		465	fig|1428.368.peg.6386	7396.01	22589.4	9528.9	11559.8	10349.2	11718.7
466	fig|11428.3.peg.3502	69050.2	249632	219326	157380	233881	182931		466	fig|11428.3.peg.3502	96775.6	255744	186564	190650	189532	170122
467	fig|11428.3.peg.2193	63963.9	82113.8	40200	66382.8	78736.2	51190.1		467	fig|11428.3.peg.2193	89647.1	84124.4	34195	80415.8	63806	47605.7
468	fig|11428.3.peg.5173	175700	304317	213412	165021	289804	91616.6		468	fig|11428.3.peg.5173	246248	311768	181533	199905	234850	85201.4
469	fig|1428.368.peg.5573	26269.9	22072.1	13073.7	41418.9	2813.98	37344.9		469	fig|1428.368.peg.5573	36817.9	22612.6	11120.8	50174.7	2280.38	34729.9
470	fig|11428.3.peg.871	22593.2	23053.1	17494.4	10900	9635.31	25470.2		470	fig|11428.3.peg.871	31664.9	23617.6	14881.1	13204.3	7808.23	23686.7
471	fig|11428.3.peg.2115	39628.5	75281.5	117297	88442	74932.8	49845.4		471	fig|11428.3.peg.2115	55540.4	77124.8	99775.9	107138	60723.8	46355.1
472	fig|11428.3.peg.5347	75904.5	128051	62414	19835.6	32931	19243		472	fig|11428.3.peg.5347	106382	131186	53090.8	24028.7	26686.5	17895.5
473	fig|11428.3.peg.1486	20173.3	50791.8	25518.8	33963.2	84287.7	68252.2		473	fig|11428.3.peg.1486	28273.4	52035.5	21706.9	41142.8	68304.8	63473
474	fig|11428.3.peg.3161	5445.2	118915	232958	69500.2	146142	4971.97		474	fig|11428.3.peg.3161	7631.59	121827	198159	84192.3	118430	4623.82
475	fig|11428.3.peg.4149	70577.3	171678	82679.8	121286	162929	32731.3		475	fig|11428.3.peg.4149	98915.8	175881	70329.3	146926	132034	30439.3
476	fig|11428.3.peg.4694	198015	295199	357921	254169	353081	183455		476	fig|11428.3.peg.4694	277523	302427	304456	307900	286129	170609
477	fig|11428.3.peg.3858	115819	111824	197974	203140	448830	245251		477	fig|11428.3.peg.3858	162323	114562	168401	246083	363722	228078
478	fig|11428.3.peg.4658	17756.8	967.838	23891.8	7759.91	19913.9	24213.5		478	fig|11428.3.peg.4658	24886.5	991.536	20322.9	9400.32	16137.7	22518
479	fig|11428.3.peg.105	78943.7	70736.4	127435	69420.4	92920.4	157419		479	fig|11428.3.peg.105	110642	72468.4	108399	84095.6	75300.5	146396
480	fig|1428.368.peg.5471	3539.77	1519.35	3161.39	248.959	1258.83	13569.2		480	fig|1428.368.peg.5471	4961.08	1556.55	2689.15	301.589	1020.12	12619.1
481	fig|11428.3.peg.6124	18399.7	24707.9	16742.7	26754.7	44161	35648.9		481	fig|11428.3.peg.6124	25787.6	25312.8	14241.7	32410.6	35787.1	33152.7
482	fig|11428.3.peg.4945	59497.3	323578	281609	221619	490850	162183		482	fig|11428.3.peg.4945	83387	331501	239543	268469	397774	150827
483	fig|1428.368.peg.4754	65127.4	14078.2	27771.9	8453.07	21116.8	125701		483	fig|1428.368.peg.4754	91277.7	14422.9	23623.4	10240	17112.6	116899
484	fig|11428.3.peg.5191	9324.67	67179.7	49978.4	28992	101813	35203.4		484	fig|11428.3.peg.5191	13068.8	68824.6	42512.8	35120.8	82506.6	32738.4
485	fig|11428.3.peg.5057	37304.1	26119.3	5015.26	12756.1	5287.77	26208.5		485	fig|11428.3.peg.5057	52282.6	26758.9	4266.09	15452.7	4285.08	24373.3
486	fig|11428.3.peg.2032	1.42363e+06	1.28173e+06	2.35297e+06	1.10956e+06	1.54574e+06	1.85265e+06		486	fig|11428.3.peg.2032	1.99526e+06	1.31311e+06	2.00149e+06	1.34412e+06	1.25263e+06	1.72292e+06
487	fig|11428.3.peg.5075	26743.8	2677.08	63469.4	22749.6	35859.8	43397.1		487	fig|11428.3.peg.5075	37482.1	2742.63	53988.5	27558.8	29060	40358.4
488	fig|1428.368.peg.6294	4210.09	582.971	68183.2	21417.8	46360.8	11019.4		488	fig|1428.368.peg.6294	5900.55	597.245	57998.2	25945.4	37569.7	10247.8
489	fig|1428.368.peg.3083	43017.5	73868	50554	53572.3	98870.5	149693		489	fig|1428.368.peg.3083	60290.1	75676.6	43002.4	64897.2	80122.3	139211
490	fig|11428.3.peg.3927	66128.9	177681	178154	128638	357951	266351		490	fig|11428.3.peg.3927	92681.4	182032	151542	155832	290075	247701
491	fig|11428.3.peg.654	61411.7	238048	65164.5	57846.1	79995.5	58688.2		491	fig|11428.3.peg.654	86070.1	243877	55430.4	70074.6	64826.5	54578.7
492	fig|11428.3.peg.4174	45401.1	70189.5	51313.2	86005	62364.1	32023.5		492	fig|11428.3.peg.4174	63630.8	71908	43648.2	104186	50538.4	29781.2
493	fig|11428.3.peg.3865	64568.6	385944	97559.3	241266	374001	129200		493	fig|11428.3.peg.3865	90494.5	395394	82986.2	292269	303082	120153
494	fig|11428.3.peg.2237	466922	197823	447829	49388.8	77634.1	399614		494	fig|11428.3.peg.2237	654403	202666	380934	59829.4	62912.8	371632
495	fig|11428.3.peg.2012	9535.21	55816.1	24447.7	53501.9	94587.2	10760.4		495	fig|11428.3.peg.2012	13363.8	57182.7	20795.8	64812	76651.2	10006.9
496	fig|11428.3.peg.2051	12904.7	24905.5	19829.5	32074.9	13074.5	29067.6		496	fig|11428.3.peg.2051	18086.3	25515.4	16867.4	38855.4	10595.3	27032.2
497	fig|11428.3.peg.4905	49425.4	30313.2	49746.9	8235.17	24058.3	44646.8		497	fig|11428.3.peg.4905	69270.9	31055.4	42315.9	9976.05	19496.3	41520.5
498	fig|11428.3.peg.4558	7547.24	53171.5	42110	170762	223598	18805.6		498	fig|11428.3.peg.4558	10577.7	54473.4	35819.7	206861	181199	17488.8
499	fig|1428.368.peg.5502	12064.7	8485.18	18005.4	16003.9	22692.2	6564.72		499	fig|1428.368.peg.5502	16908.9	8692.94	15315.8	19387.1	18389.2	6105.04
500	fig|11428.3.peg.1891	161173	343550	336597	207151	109860	237113		500	fig|11428.3.peg.1891	225889	351962	286318	250942	89028.2	220509
501	fig|11428.3.peg.2407	30162	48443.5	52657.4	32762.5	81777.8	43300.1		501	fig|11428.3.peg.2407	42272.7	49629.6	44791.6	39688.4	66270.8	40268.1
502	fig|1428.368.peg.5437	76949.1	95911.4	34387.8	37064.5	103760	79383.8		502	fig|1428.368.peg.5437	107846	98259.8	29251.1	44899.8	84084.8	73825.2
503	fig|11428.3.peg.2375	435516	387862	543672	167764	500630	316737		503	fig|11428.3.peg.2375	610387	397359	462460	203229	405698	294558
504	fig|11428.3.peg.4279	166127	721954	670825	338292	201725	614860		504	fig|11428.3.peg.4279	232831	739631	570620	409806	163473	571806
505	fig|11428.3.peg.862	37378.1	54705.7	50990.5	26328.2	74955.1	57166		505	fig|11428.3.peg.862	52386.4	56045.2	43373.7	31893.9	60741.8	53163.1
506	fig|11428.3.peg.4471	164253	35782.9	54122	24947.5	34868.2	19635		506	fig|11428.3.peg.4471	230204	36659	46037.4	30221.3	28256.4	18260.1
507	fig|11428.3.peg.1288	47704.7	90422.9	74940.9	21693.8	52849.6	22210.1		507	fig|11428.3.peg.1288	66859.3	92636.9	63746.5	26279.8	42828.1	20654.9
508	fig|11428.3.peg.6125	1.37145e+06	913015	1.49264e+06	1.14469e+06	2.14143e+06	1.35385e+06		508	fig|11428.3.peg.6125	1.92213e+06	935370	1.26967e+06	1.38667e+06	1.73536e+06	1.25905e+06
509	fig|11428.3.peg.1286	48716	64683.5	92200.6	11686.5	104717	85232		509	fig|11428.3.peg.1286	68276.7	66267.2	78428	14157	84860.4	79263.9
510	fig|11428.3.peg.3476	131480	92309.3	130955	93597.8	112768	333687		510	fig|11428.3.peg.3476	184273	94569.5	111393	113384	91384.6	310322
511	fig|1428.368.peg.3434	11645.8	9508.33	206366	804.252	11397.1	35690.7		511	fig|1428.368.peg.3434	16321.9	9741.14	175540	974.268	9235.91	33191.5
512	fig|11428.3.peg.3722	65367.4	91337.5	180693	50704.9	100153	337858		512	fig|11428.3.peg.3722	91614.1	93573.9	153702	61423.7	81161.3	314201
513	fig|11428.3.peg.6	226518	347862	293508	300266	258274	243840		513	fig|11428.3.peg.6	317470	356380	249665	363742	209299	226766
514	fig|1428.368.peg.3797	25894.4	107579	201315	59075.9	8477.84	7671.71		514	fig|1428.368.peg.3797	36291.7	110213	171244	71564.3	6870.24	7134.52
515	fig|11428.3.peg.4017	137050	323175	174628	87974.4	193153	119417		515	fig|11428.3.peg.4017	192079	331088	148543	106572	156527	111055
516	fig|11428.3.peg.615	20724.4	117575	173317	65947.5	181442	152195		516	fig|11428.3.peg.615	29045.8	120453	147427	79888.6	147036	141538
517	fig|11428.3.peg.2684	101888	155876	268682	66121.8	231267	98600.1		517	fig|11428.3.peg.2684	142799	159693	228548	80099.8	187413	91695.9
518	fig|11428.3.peg.3490	13378.1	3502.41	8276.93	140.008	636.173	20005		518	fig|11428.3.peg.3490	18749.7	3588.17	7040.55	169.605	515.539	18604.2
519	fig|11428.3.peg.3352	6952.5	3116.04	5615.71	10387.6	5125.85	32034		519	fig|11428.3.peg.3352	9744.11	3192.34	4776.85	12583.5	4153.87	29790.9
520	fig|11428.3.peg.1313	281354	170760	224988	160956	245219	588505		520	fig|11428.3.peg.1313	394324	174941	191380	194982	198720	547296
521	fig|11428.3.peg.2009	12453.3	48539.9	58458.4	23248.4	72577.5	19660.1		521	fig|11428.3.peg.2009	17453.6	49728.4	49726	28163.1	58815.1	18283.5
522	fig|11428.3.peg.571	213839	125012	433679	195477	116263	365222		522	fig|11428.3.peg.571	299700	128073	368897	236800	94216.9	339648
523	fig|11428.3.peg.2470	9057.19	6308.2	12891.5	5813.09	57371.2	2695.47		523	fig|11428.3.peg.2470	12693.9	6462.65	10965.8	7041.96	46492.3	2506.72
524	fig|11428.3.peg.6129	66921.1	79273.1	53810.7	63778	95990.6	100371		524	fig|11428.3.peg.6129	93791.6	81214.2	45772.6	77260.4	77788.5	93343.1
525	fig|11428.3.peg.2515	65151.4	77914.4	56640.5	148818	295668	219889		525	fig|11428.3.peg.2515	91311.4	79822.1	48179.8	180278	239602	204492
526	fig|11428.3.peg.541	40873.9	43545.9	32296.7	22431.3	36724.3	45479.4		526	fig|11428.3.peg.541	57285.9	44612.1	27472.3	27173.2	29760.5	42294.8
527	fig|11428.3.peg.2850	328806	86701.6	295838	227180	134790	376260		527	fig|11428.3.peg.2850	460831	88824.5	251646	275205	109231	349913
528	fig|1428.368.peg.6300	303505	332210	444308	259014	370583	6668.6		528	fig|1428.368.peg.6300	425369	340344	377939	313768	300312	6201.65
529	fig|11428.3.peg.1006	2651.6	1006.78	4152.25	1474.35	16274.1	24386.2		529	fig|11428.3.peg.1006	3716.28	1031.43	3532	1786.02	13188.2	22678.6
530	fig|11428.3.peg.839	2465.37	1698.61	1846.96	6719.24	8216.53	15659.5		530	fig|11428.3.peg.839	3455.28	1740.2	1571.07	8139.66	6658.48	14563
531	fig|11428.3.peg.2041	64254.5	51547.7	88081.7	115567	194422	57304.5		531	fig|11428.3.peg.2041	90054.3	52809.9	74924.3	139998	157555	53291.9
532	fig|11428.3.peg.5201	83124.4	186238	80838	241629	266864	175886		532	fig|11428.3.peg.5201	116501	190798	68762.7	292708	216260	163570
533	fig|1428.368.peg.5649	50425.2	56952	69841	28914.3	9900.62	126003		533	fig|1428.368.peg.5649	70672.2	58346.5	59408.4	35026.7	8023.22	117180
534	fig|11428.3.peg.1991	97497.9	169341	163645	56634	167395	102871		534	fig|11428.3.peg.1991	136646	173487	139200	68606.2	135653	95667.5
535	fig|11428.3.peg.1829	56645.7	98034.7	65109.8	36971.1	156401	162578		535	fig|11428.3.peg.1829	79390.4	100435	55383.9	44786.6	126743	151194
536	fig|1428.368.peg.6080	2028.15	2282.08	578.924	2901.7	512.281	7418.13		536	fig|1428.368.peg.6080	2842.51	2337.96	492.446	3515.11	415.141	6898.69
537	fig|11428.3.peg.4447	8296.48	83254.1	19912.3	96995.5	85440.5	26644		537	fig|11428.3.peg.4447	11627.7	85292.6	16937.8	117500	69239	24778.3
538	fig|11428.3.peg.1769	141052	117567	273517	144904	245982	188258		538	fig|11428.3.peg.1769	197689	120446	232660	175536	199338	175076
539	fig|11428.3.peg.5488	170941	446201	343949	351851	444792	158829		539	fig|11428.3.peg.5488	239578	457126	292571	426230	360449	147707
540	fig|11428.3.peg.1514	486724	1.21701e+06	1.56099e+06	1.33857e+06	2.11737e+06	1.54772e+06		540	fig|11428.3.peg.1514	682156	1.24681e+06	1.32781e+06	1.62154e+06	1.71587e+06	1.43934e+06
541	fig|11428.3.peg.5626	22151.8	56630.2	51479.8	237998	192763	8744.42		541	fig|11428.3.peg.5626	31046.3	58016.8	43789.9	288309	156210	8132.11
542	fig|11428.3.peg.608	20486.8	32521.4	46425	42254.6	49833.2	29088.8		542	fig|11428.3.peg.608	28712.8	33317.7	39490.2	51187.1	40383.6	27051.9
543	fig|11428.3.peg.4526	227870	662425	664561	212261	240424	451965		543	fig|11428.3.peg.4526	319366	678644	565291	257132	194834	420317
544	fig|11428.3.peg.816	9993.08	3909.46	7641.21	2429.53	1323.95	7392.41		544	fig|11428.3.peg.816	14005.6	4005.18	6499.79	2943.13	1072.9	6874.78
545	fig|11428.3.peg.6025	306575	423576	218946	59046	143706	275429		545	fig|11428.3.peg.6025	429672	433948	186241	71528.1	116456	256142
546	fig|1428.368.peg.2907	29029.1	42624.3	37064.2	43709.8	49196.8	59448.6		546	fig|1428.368.peg.2907	40685	43668	31527.7	52949.9	39867.9	55285.8
547	fig|11428.3.peg.446	1.24047e+06	2.24907e+06	2.02634e+06	2.5772e+06	3.90434e+06	1.89215e+06		547	fig|11428.3.peg.446	1.73855e+06	2.30414e+06	1.72365e+06	3.12201e+06	3.16398e+06	1.75966e+06
548	fig|1428.368.peg.4301	6691.7	30865.3	41079	11662	60876.3	2587.81		548	fig|1428.368.peg.4301	9378.59	31621	34942.8	14127.4	49332.7	2406.61
549	fig|1428.368.peg.1909	34102.6	20729.4	37139.2	9253.94	15404.9	51641.1		549	fig|1428.368.peg.1909	47795.6	21237	31591.5	11210.2	12483.8	48025.1
550	fig|11428.3.peg.3240	25344.1	19666.6	8391.68	21081.7	7106.64	47766.3		550	fig|11428.3.peg.3240	35520.4	20148.1	7138.16	25538.3	5759.05	44421.6
551	fig|11428.3.peg.5210	8991.86	25380	15519.1	7894.49	74207.7	29683.4		551	fig|11428.3.peg.5210	12602.3	26001.4	13200.9	9563.36	60136.2	27604.9
552	fig|1428.368.peg.4398	24462.3	40929.1	47461.3	41714.9	60856.3	45837.2		552	fig|1428.368.peg.4398	34284.6	41931.3	40371.7	50533.3	49316.5	42627.6
553	fig|1428.368.peg.1351	3828.16	35501.9	59730.1	32211.2	43771.3	45207.3		553	fig|1428.368.peg.1351	5365.27	36371.2	50807.8	39020.5	35471.2	42041.8
554	fig|1428.368.peg.760	11879.1	5134.12	25600.4	10170.5	19210	25757.3		554	fig|1428.368.peg.760	16648.9	5259.83	21776.3	12320.5	15567.3	23953.7
555	fig|11428.3.peg.136	27659.1	21635	21215.1	53310.5	79615.2	27266.5		555	fig|11428.3.peg.136	38764.9	22164.7	18046.1	64580.1	64518.3	25357.2
556	fig|11428.3.peg.5277	23544.6	36495.5	48220.7	3189.56	33762.1	31904.4		556	fig|11428.3.peg.5277	32998.4	37389.1	41017.7	3863.82	27360	29670.4
557	fig|1428.368.peg.6295	167601	234709	268896	195398	170706	296969		557	fig|1428.368.peg.6295	234898	240455	228729	236705	138336	276174
558	fig|1428.368.peg.2159	39926.2	383.682	48308.7	7762.26	20727.5	39957.4		558	fig|1428.368.peg.2159	55957.6	393.077	41092.5	9403.17	16797	37159.4
559	fig|11428.3.peg.3229	121294	99434.8	108092	77167.6	96690.8	198998		559	fig|11428.3.peg.3229	169996	101870	91945.8	93480.6	78356	185063
560	fig|1428.368.peg.6143	5832.49	36022.7	33943.1	23485.7	33926	6412.75		560	fig|1428.368.peg.6143	8174.38	36904.8	28872.8	28450.5	27492.8	5963.71
561	fig|11428.3.peg.350	35914.8	63202.2	49081.9	37767.9	42450.3	64817		561	fig|11428.3.peg.350	50335.5	64749.7	41750.2	45751.9	34400.8	60278.4
562	fig|11428.3.peg.1105	55468.5	23709.3	30490.1	11424.7	25087.4	54524.7		562	fig|11428.3.peg.1105	77740.6	24289.8	25935.6	13839.8	20330.2	50706.8
563	fig|11428.3.peg.2099	141637	220771	226976	101178	177539	162312		563	fig|11428.3.peg.2099	198509	226176	193071	122567	143873	150946
564	fig|11428.3.peg.1527	137340	498225	501300	308133	460506	277060		564	fig|11428.3.peg.1527	192486	510424	426417	373272	373183	257660
565	fig|1428.368.peg.6118	8888.18	29975.3	25489.9	26596.8	55709.3	6500.85		565	fig|1428.368.peg.6118	12457	30709.3	21682.3	32219.3	45145.5	6045.64
566	fig|11428.3.peg.4289	93725.5	59451.4	56442.1	64109.9	185845	128872		566	fig|11428.3.peg.4289	131359	60907.1	48011	77662.6	150604	119848
567	fig|1428.368.peg.4515	159.026	544.178	2194.95	343.694	591.052	8225.22		567	fig|1428.368.peg.4515	222.878	557.502	1867.08	416.35	478.975	7649.27
568	fig|11428.3.peg.311	45192.9	51294	100148	28764.1	83090.5	18294.8		568	fig|11428.3.peg.311	63339	52550	85188.6	34844.8	67334.5	17013.8
569	fig|11428.3.peg.967	169216	191436	209028	172364	344095	305020		569	fig|11428.3.peg.967	237160	196123	177804	208801	278846	283662
570	fig|11428.3.peg.2050	209501	151584	213040	107252	197255	196897		570	fig|11428.3.peg.2050	293622	155296	181217	129925	159850	183110
571	fig|1428.368.peg.5459	8542.32	4050.15	9339.89	3125.6	10889.9	10807.9		571	fig|1428.368.peg.5459	11972.3	4149.32	7944.73	3786.34	8824.88	10051.1
572	fig|11428.3.peg.307	111838	28698.4	74463.2	11835.4	23297.3	141083		572	fig|11428.3.peg.307	156744	29401.1	63340.1	14337.4	18879.6	131204
573	fig|11428.3.peg.2742	9244.2	1385.61	14164.6	948.176	8365.48	28847.3		573	fig|11428.3.peg.2742	12956	1419.53	12048.7	1148.62	6779.19	26827.3
574	fig|11428.3.peg.2173	5117.86	75562.7	67360.5	100909	26176.3	37850.5		574	fig|11428.3.peg.2173	7172.81	77412.9	57298.4	122241	21212.7	35200.1
575	fig|1428.368.peg.4758	4788.89	6159.66	7503.85	10625.4	20897.4	22062.9		575	fig|1428.368.peg.4758	6711.76	6310.48	6382.95	12871.5	16934.7	20518
576	fig|11428.3.peg.2886	11471.1	169504	233148	109758	130761	244392		576	fig|11428.3.peg.2886	16077	173655	198321	132960	105966	227279
577	fig|1428.368.peg.3570	95964.2	166911	185132	198582	569770	418461		577	fig|1428.368.peg.3570	134496	170997	157478	240562	461728	389159
578	fig|1428.368.peg.3913	29585.5	69949.3	55474.9	63691.5	104830	52204.8		578	fig|1428.368.peg.3913	41464.9	71662	47188.2	77155.6	84951.7	48549.2
579	fig|1428.368.peg.4818	86875.6	76827.5	158108	152158	286269	211375		579	fig|1428.368.peg.4818	121758	78708.6	134491	184324	231986	196574
580	fig|11428.3.peg.598	80031.3	97385.3	135864	166295	87865.5	252511		580	fig|11428.3.peg.598	112166	99769.7	115569	201449	71204.1	234830
581	fig|11428.3.peg.3525	10459.2	8277.47	20068	1201.98	4582.29	10453.6		581	fig|11428.3.peg.3525	14658.8	8480.14	17070.3	1456.08	3713.38	9721.6
582	fig|11428.3.peg.1294	53582.7	366730	123395	106403	160843	43124.5		582	fig|11428.3.peg.1294	75097.5	375710	104963	128897	130343	40104.8
583	fig|11428.3.peg.1064	107085	79897.7	43193	32124.6	105803	47422.4		583	fig|11428.3.peg.1064	150082	81854	36740.9	38915.6	85740.4	44101.8
584	fig|11428.3.peg.81	9968.83	18622.4	7669.29	11734.7	17622.5	20703.5		584	fig|11428.3.peg.81	13971.6	19078.4	6523.68	14215.4	14280.9	19253.8
585	fig|11428.3.peg.659	30428.4	267881	139212	79037.2	219684	41733.7		585	fig|11428.3.peg.659	42646.2	274440	118417	95745.4	178027	38811.4
586	fig|11428.3.peg.3528	224816	60838.6	431851	207958	278447	124651		586	fig|11428.3.peg.3528	315086	62328.3	367342	251920	225647	115923
587	fig|11428.3.peg.1706	4376.47	6033.44	14302	10042	14939.5	7588.16		587	fig|11428.3.peg.1706	6133.73	6181.17	12165.6	12164.9	12106.6	7056.81
588	fig|11428.3.peg.3248	62661.8	131943	220385	79670.1	124994	207300		588	fig|11428.3.peg.3248	87822.1	135174	187464	96512	101292	192784
589	fig|11428.3.peg.2889	89106	107464	135075	163146	201922	165271		589	fig|11428.3.peg.2889	124884	110095	114898	197635	163633	153699
590	fig|1428.368.peg.4479	12817.3	22867.5	28190.4	13496.2	45597.7	79047.2		590	fig|1428.368.peg.4479	17963.8	23427.4	23979.4	16349.2	36951.3	73512.1
591	fig|1428.368.peg.3934	17368	451.408	1535.15	779.072	3015.9	5412.5		591	fig|1428.368.peg.3934	24341.7	462.461	1305.83	943.765	2444.02	5033.5
592	fig|1428.368.peg.4724	41485.5	4856.93	8725.28	632.631	26390.5	26167.9		592	fig|1428.368.peg.4724	58143	4975.85	7421.92	766.367	21386.2	24335.6
593	fig|11428.3.peg.2517	20505.4	55293.8	66047.4	65361.9	98139.4	17516.5		593	fig|11428.3.peg.2517	28738.8	56647.7	56181.5	79179.1	79529.9	16290
594	fig|11428.3.peg.1204	11146.5	15361.7	24920.4	8027.45	37552.3	26001.3		594	fig|11428.3.peg.1204	15622.1	15737.8	21197.9	9724.43	30431.5	24180.7
595	fig|11428.3.peg.39	31131.1	7212.36	28836.8	3180.56	18616.5	18300.8		595	fig|11428.3.peg.39	43631	7388.96	24529.2	3852.92	15086.4	17019.4
596	fig|11428.3.peg.3209	54075.1	172736	84217.6	85018.3	343688	81920.6		596	fig|11428.3.peg.3209	75787.6	176965	71637.5	102991	278516	76184.3
597	fig|11428.3.peg.13	87811.1	291533	136569	223354	391977	172216		597	fig|11428.3.peg.13	123069	298671	116169	270570	317649	160157
598	fig|11428.3.peg.1703	27569.6	29614.7	29074.1	27232.3	62104.2	85276.7		598	fig|11428.3.peg.1703	38639.4	30339.9	24731.1	32989.1	50327.8	79305.4
599	fig|11428.3.peg.1663	41879.9	6769.27	40944.9	12516	34715.1	41826.3		599	fig|11428.3.peg.1663	58695.8	6935.01	34828.7	15161.8	28132.3	38897.6
600	fig|11428.3.peg.5850	27259.7	14737.6	24467.5	19361.2	37814.1	116881		600	fig|11428.3.peg.5850	38205.1	15098.4	20812.7	23454.1	30643.6	108697
601	fig|11428.3.peg.3958	120585	234315	388778	295565	417028	238288		601	fig|11428.3.peg.3958	169003	240052	330703	358047	337950	221602
602	fig|11428.3.peg.5562	55853.3	108091	64725.8	40144.6	79338.8	121605		602	fig|11428.3.peg.5562	78279.9	110738	55057.3	48631	64294.3	113090
603	fig|11428.3.peg.406	16629.6	99072.8	57276.7	156462	233862	30240.2		603	fig|11428.3.peg.406	23306.9	101499	48720.9	189538	189516	28122.7
604	fig|11428.3.peg.3147	9370.33	4234.68	2539.03	4464.02	6949.95	13806.6		604	fig|11428.3.peg.3147	13132.8	4338.36	2159.76	5407.7	5632.07	12839.8
605	fig|11428.3.peg.5948	55083.1	156068	180302	110790	98859.6	108283		605	fig|11428.3.peg.5948	77200.4	159889	153369	134211	80113.5	100701
606	fig|1428.368.peg.6321	32437.2	10896.5	74954.8	59946.8	118113	48272.6		606	fig|1428.368.peg.6321	45461.6	11163.3	63758.3	72619.4	95716.4	44892.4
607	fig|11428.3.peg.1914	11934.5	41644	42670.8	7927.86	38364.8	12437.9		607	fig|11428.3.peg.1914	16726.5	42663.6	36296.7	9603.79	31090	11567
608	fig|11428.3.peg.5932	340.813	2207.93	2603.38	1518.27	673.231	20469.2		608	fig|11428.3.peg.5932	477.658	2261.99	2214.5	1839.22	545.571	19035.9
609	fig|1428.368.peg.325	14362	5550.93	16948.9	8539	4133.86	43476.6		609	fig|1428.368.peg.325	20128.6	5686.84	14417.1	10344.1	3349.98	40432.3
610	fig|1428.368.peg.4258	36829.5	41739.1	30456.5	43206.3	57119.5	22275.9		610	fig|1428.368.peg.4258	51617.5	42761.1	25907	52340	46288.3	20716
611	fig|11428.3.peg.4543	13476.5	5794.55	12928.6	2727.52	13493.6	24146.2		611	fig|11428.3.peg.4543	18887.7	5936.43	10997.4	3304.1	10934.9	22455.4
612	fig|1428.368.peg.3880	21897.3	4658.96	33134.7	22245.9	42653.6	56738.5		612	fig|1428.368.peg.3880	30689.6	4773.03	28185.2	26948.6	34565.4	52765.5
613	fig|11428.3.peg.3457	72164.6	11241.4	111554	52486.7	155022	190423		613	fig|11428.3.peg.3457	101141	11516.6	94890.6	63582.1	125626	177089
614	fig|11428.3.peg.5209	43400.7	57811.2	13174.7	16929.1	64068.1	31571.3		614	fig|11428.3.peg.5209	60827.1	59226.7	11206.7	20507.9	51919.3	29360.6
615	fig|11428.3.peg.4775	2877.94	5990.2	6241.2	232.37	34226.4	49029.5		615	fig|11428.3.peg.4775	4033.51	6136.87	5308.91	281.492	27736.3	45596.4
616	fig|11428.3.peg.1077	17133.9	7643.12	9763.05	8552.75	15182.2	30901.9		616	fig|11428.3.peg.1077	24013.6	7830.26	8304.68	10360.8	12303.3	28738.1
617	fig|11428.3.peg.1153	13457.1	23070.8	33775.3	26713.3	30648.5	67342.4		617	fig|11428.3.peg.1153	18860.5	23635.7	28730	32360.4	24836.8	62627
618	fig|11428.3.peg.4995	159402	323503	274628	293047	345870	165742		618	fig|11428.3.peg.4995	223406	331424	233605	354996	280285	154136
619	fig|11428.3.peg.3399	109193	207656	166472	65455.6	197832	133705		619	fig|11428.3.peg.3399	153037	212741	141605	79292.7	160319	124342
620	fig|11428.3.peg.1855	63058.1	38503.2	68638.6	33806.7	109143	142432		620	fig|11428.3.peg.1855	88377.5	39446	58385.6	40953.3	88446.6	132459
621	fig|11428.3.peg.5597	77857.9	189934	174438	294883	120563	38692.7		621	fig|11428.3.peg.5597	109120	194585	148381	357220	97701.6	35983.3
622	fig|11428.3.peg.822	18416.7	45813.5	32214.3	43532.2	16908.6	8238.82		622	fig|11428.3.peg.822	25811.5	46935.3	27402.3	52734.8	13702.3	7661.92
623	fig|11428.3.peg.4208	57926.8	24899.5	59850.4	77702.5	37831.4	127152		623	fig|11428.3.peg.4208	81185.9	25509.1	50910.1	94128.5	30657.7	118248
624	fig|11428.3.peg.3985	34529.3	24787.2	47599.8	75629.2	69128	107964		624	fig|11428.3.peg.3985	48393.7	25394.1	40489.5	91616.9	56019.7	100404
625	fig|11428.3.peg.3743	63553.9	40591.2	100596	30180.5	32301.8	71133.8		625	fig|11428.3.peg.3743	89072.4	41585.1	85569.5	36560.5	26176.6	66152.8
626	fig|11428.3.peg.4928	52878.7	48418.2	79363	20208.1	101507	71040.5		626	fig|11428.3.peg.4928	74110.8	49603.8	67508	24480	82258.8	66066
627	fig|11428.3.peg.1205	50024.4	70655.2	121752	52559.8	104730	160311		627	fig|11428.3.peg.1205	70110.5	72385.2	103565	63670.8	84871.1	149086
628	fig|11428.3.peg.2709	30044.2	294765	406679	75242.4	81712.8	211062		628	fig|11428.3.peg.2709	42107.8	301982	345930	91148.4	66218.1	196283
629	fig|11428.3.peg.2584	11797.3	25775.1	11385.3	16449.2	48074.6	21458.3		629	fig|11428.3.peg.2584	16534.2	26406.2	9684.63	19926.5	38958.5	19955.7
630	fig|11428.3.peg.1945	38326.2	33055.2	28456	21822.2	46444.1	45704.1		630	fig|11428.3.peg.1945	53715.2	33864.5	24205.3	26435.4	37637.2	42503.8
631	fig|1428.368.peg.6130	165003	190763	358980	221607	433521	298281		631	fig|1428.368.peg.6130	231256	195434	305357	268453	351315	277395
632	fig|11428.3.peg.2018	33406.1	119239	64982.7	38754.7	107406	35820.9		632	fig|11428.3.peg.2018	46819.5	122159	55275.8	46947.4	87038.9	33312.6
633	fig|11428.3.peg.3170	11084.9	26692.7	18131.9	35193	16850.5	30331.1		633	fig|11428.3.peg.3170	15535.8	27346.2	15423.5	42632.7	13655.2	28207.2
634	fig|11428.3.peg.2504	35852.8	149322	50833.3	95478.6	122799	125841		634	fig|11428.3.peg.2504	50248.6	152978	43240	115662	99513.3	117030
635	fig|11428.3.peg.2554	81487.2	124070	90356.8	48491.1	81688.7	59189.5		635	fig|11428.3.peg.2554	114206	127108	76859.6	58742	66198.6	55044.9
636	fig|11428.3.peg.5991	63996.3	80569.9	50228.3	37495.7	134936	63995.7		636	fig|11428.3.peg.5991	89692.5	82542.6	42725.4	45422.2	109349	59514.6
637	fig|11428.3.peg.3501	326815	299102	445142	273358	33665	360492		637	fig|11428.3.peg.3501	458040	306426	378648	331145	27281.3	335249
638	fig|11428.3.peg.4218	32848	111576	52129.3	102443	162436	157729		638	fig|11428.3.peg.4218	46037.3	114308	44342.4	124099	131634	146684
639	fig|11428.3.peg.289	305995	76978	736189	130849	438901	389749		639	fig|11428.3.peg.289	428860	78862.8	626219	158510	355675	362458
640	fig|11428.3.peg.135	28694.8	19714	31543.2	16493.9	33524.5	66387.9		640	fig|11428.3.peg.135	40216.4	20196.7	26831.4	19980.6	27167.4	61739.3
641	fig|11428.3.peg.1290	117659	223710	176775	154566	126613	30537.4		641	fig|11428.3.peg.1290	164903	229188	150369	187241	102605	28399.1
642	fig|11428.3.peg.3146	11195.2	9314.39	11581	3256.5	5090.78	21162.9		642	fig|11428.3.peg.3146	15690.4	9542.45	9851.08	3944.91	4125.45	19681
643	fig|11428.3.peg.3462	19448.6	4358.75	4319.6	14897.2	14689.2	45278.4		643	fig|11428.3.peg.3462	27257.7	4465.48	3674.36	18046.4	11903.7	42107.9
644	fig|1428.368.peg.2790	3338.02	5308.67	63445.1	4530.1	108718	76624		644	fig|1428.368.peg.2790	4678.32	5438.66	53967.9	5487.75	88102.8	71258.6
645	fig|1428.368.peg.4487	6747.71	4729.62	20078.4	5120.72	54391.2	46069.4		645	fig|1428.368.peg.4487	9457.09	4845.42	17079.2	6203.22	44077.4	42843.5
646	fig|11428.3.peg.481	49645.8	114973	93745.9	47109.8	41213.1	88312.5		646	fig|11428.3.peg.481	69579.9	117788	79742.4	57068.6	33398.1	82128.7
647	fig|11428.3.peg.4507	12352.6	330.059	10424.7	725.508	1542.33	8808.7		647	fig|11428.3.peg.4507	17312.5	338.141	8867.48	878.878	1249.87	8191.9
648	fig|11428.3.peg.3347	495040	306591	461944	308754	411693	803536		648	fig|11428.3.peg.3347	693812	314098	392940	374023	333627	747271
649	fig|11428.3.peg.3230	8303.57	37005.7	66028.1	61830.8	113611	84638.6		649	fig|11428.3.peg.3230	11637.7	37911.8	56165	74901.7	92067.6	78712
650	fig|1428.368.peg.2418	8277.49	10398.9	9968.81	7971.48	11033.1	20992.9		650	fig|1428.368.peg.2418	11601.1	10653.5	8479.7	9656.63	8940.99	19522.9
651	fig|11428.3.peg.4936	33174.4	47213.8	42745.1	109487	36488.1	20018.7		651	fig|11428.3.peg.4936	46494.8	48369.8	36360	132633	29569.1	18616.9
652	fig|1428.368.peg.4962	3214.56	3981.04	3259.8	4536.18	30265.7	13141.3		652	fig|1428.368.peg.4962	4505.29	4078.52	2772.87	5495.12	24526.6	12221.1
653	fig|11428.3.peg.3853	40462.7	107675	63984.8	39248	121897	76482.9		653	fig|11428.3.peg.3853	56709.6	110311	54427	47544.9	98782.8	71127.3
654	fig|11428.3.peg.4272	28227	11443	51730.1	45585.6	68111.4	42555.3		654	fig|11428.3.peg.4272	39560.8	11723.2	44002.8	55222.3	55195.8	39575.5
655	fig|11428.3.peg.5230	59144.1	114086	120522	115834	259395	250556		655	fig|11428.3.peg.5230	82892	116880	102519	140321	210208	233011
656	fig|1428.368.peg.3348	8708.29	3078.65	6898.4	2158.76	7080.84	9121.65		656	fig|1428.368.peg.3348	12204.9	3154.03	5867.94	2615.11	5738.15	8482.93
657	fig|11428.3.peg.5139	90469.1	103528	122260	73747.7	38518	170455		657	fig|11428.3.peg.5139	126795	106063	103998	89337.7	31214.1	158519
658	fig|11428.3.peg.472	21827.9	21363	28619.3	2802.48	13052.1	23810.6		658	fig|11428.3.peg.472	30592.3	21886.1	24344.3	3394.91	10577.2	22143.3
659	fig|11428.3.peg.1387	90554.9	27822.1	49292.3	10890.7	27061.6	45048.1		659	fig|11428.3.peg.1387	126915	28503.3	41929.1	13193	21930.1	41893.7
660	fig|1428.368.peg.4296	24492.7	16703.8	24450.8	15684.7	28484	38580.8		660	fig|1428.368.peg.4296	34327.1	17112.8	20798.4	19000.4	23082.8	35879.3
661	fig|1428.368.peg.5663	32551.8	34916.8	34406.6	1593.21	73013.6	75978.5		661	fig|1428.368.peg.5663	45622.2	35771.7	29267	1930.01	59168.5	70658.3
662	fig|11428.3.peg.1283	16914.2	21683.8	26785.5	12278.9	15531.5	12431.1		662	fig|11428.3.peg.1283	23705.7	22214.7	22784.4	14874.6	12586.3	11560.7
663	fig|11428.3.peg.2106	120059	40528.2	117588	38750.2	76831.5	84709.6		663	fig|11428.3.peg.2106	168265	41520.5	100023	46941.9	62262.4	78778
664	fig|1428.368.peg.2676	27566.9	35844	48593.5	124430	16789.5	164242		664	fig|1428.368.peg.2676	38635.7	36721.6	41334.8	150734	13605.8	152742
665	fig|11428.3.peg.2113	12504.1	119221	113107	15618.8	106472	93502.5		665	fig|11428.3.peg.2113	17524.8	122140	96211.5	18920.6	86282.4	86955.2
666	fig|11428.3.peg.346	36007.5	37258.1	61639.9	584.085	79171.4	100821		666	fig|11428.3.peg.346	50465.5	38170.4	52432.4	707.559	64158.6	93761
667	fig|11428.3.peg.1607	27623.2	38957.1	53182.7	24556	15750.1	24710.3		667	fig|11428.3.peg.1607	38714.6	39911	45238.5	29747.1	12763.5	22980.1
668	fig|11428.3.peg.1954	56701.3	158797	167470	86988.4	29043.7	104265		668	fig|11428.3.peg.1954	79468.3	162686	142454	105377	23536.4	96963.9
669	fig|1428.368.peg.6078	16093.2	53324.7	24832	119069	134880	65085.2		669	fig|1428.368.peg.6078	22555.1	54630.3	21122.7	144240	109303	60527.8
670	fig|11428.3.peg.5523	42610.4	130558	63246	81140	107240	55721.8		670	fig|11428.3.peg.5523	59719.6	133755	53798.5	98292.7	86904.8	51820
671	fig|11428.3.peg.1293	15884.1	1824.98	21480	2761.64	736.249	23382.7		671	fig|11428.3.peg.1293	22262	1869.66	18271.4	3345.44	596.639	21745.4
672	fig|11428.3.peg.1478	12320.1	39305.1	3561.48	38612.5	5113.37	3481.17		672	fig|11428.3.peg.1478	17267	40267.5	3029.47	46775.1	4143.75	3237.41
673	fig|11428.3.peg.4696	10768.9	6947.44	13652.1	283.041	11795	13756.7		673	fig|11428.3.peg.4696	15092.8	7117.55	11612.8	342.875	9558.36	12793.4
674	fig|11428.3.peg.213	18088.3	7311.69	16287.5	24066.7	12886.4	26581.9		674	fig|11428.3.peg.213	25351.2	7490.72	13854.5	29154.3	10442.9	24720.6
675	fig|1428.368.peg.3362	14260.2	5847.23	18445.9	3306.04	324.279	886.096		675	fig|1428.368.peg.3362	19986.1	5990.4	15690.6	4004.93	262.788	824.05
676	fig|1428.368.peg.6162	28807.1	36603	42745.5	35469.1	67782.1	31531.8		676	fig|1428.368.peg.6162	40373.8	37499.2	36360.3	42967.1	54929	29323.8
677	fig|1428.368.peg.4143	4419.93	984.163	18134.3	9752.64	22029.8	21025		677	fig|1428.368.peg.4143	6194.65	1008.26	15425.5	11814.3	17852.4	19552.8
678	fig|11428.3.peg.6073	40677.7	110489	71575.1	90588.2	86237.8	72695.1		678	fig|11428.3.peg.6073	57010.8	113194	60883.5	109738	69885	67604.8
679	fig|11428.3.peg.1080	11888	26652.4	11570.9	61032.7	56335.2	35575.9		679	fig|11428.3.peg.1080	16661.4	27305	9842.47	73934.9	45652.7	33084.8
680	fig|11428.3.peg.2014	106532	78282.3	153117	38187.8	45920.2	20498.9		680	fig|11428.3.peg.2014	149308	80199.1	130245	46260.6	37212.6	19063.5
681	fig|11428.3.peg.1986	56061.7	37304.9	33097.3	140437	33762.5	25104.2		681	fig|11428.3.peg.1986	78571.9	38218.3	28153.3	170124	27360.3	23346.4
682	fig|11428.3.peg.1871	25890.9	38287	76156.2	11300.1	68901.2	28403.2		682	fig|11428.3.peg.1871	36286.8	39224.5	64780.2	13688.9	55835.9	26414.4
683	fig|1428.368.peg.6299	4993.36	16997.9	2764.36	7196.89	30435.1	20328.3		683	fig|1428.368.peg.6299	6998.32	17414.1	2351.43	8718.28	24663.9	18904.9
684	fig|11428.3.peg.1091	7009.75	30826.4	29594.8	7368.45	18341.2	10285.7		684	fig|11428.3.peg.1091	9824.35	31581.2	25174	8926.12	14863.3	9565.48
685	fig|11428.3.peg.4430	28793.5	16442.5	40756.7	30603.6	53644.5	3887.79		685	fig|11428.3.peg.4430	40354.8	16845.1	34668.6	37073.1	43472.2	3615.56
686	fig|11428.3.peg.4721	6747.59	12094.6	42742.9	10785.2	12116.5	10080.1		686	fig|11428.3.peg.4721	9456.92	12390.7	36358.1	13065.1	9818.95	9374.25
687	fig|11428.3.peg.5280	12539.6	43288.3	31416.2	58238.2	104973	49994.2		687	fig|11428.3.peg.5280	17574.6	44348.2	26723.4	70549.5	85068	46493.5
688	fig|11428.3.peg.3742	17711.7	67937.6	51126.6	37969.3	61897.4	16631.6		688	fig|11428.3.peg.3742	24823.4	69601.1	43489.5	45995.9	50160.2	15467
689	fig|1428.368.peg.5901	41676.2	179196	61811.5	99765.9	234337	57588.6		689	fig|1428.368.peg.5901	58410.3	183583	52578.3	120856	189901	53556.1
690	fig|1428.368.peg.6018	13477.9	36627.6	30225.3	22715.9	17828.1	13765		690	fig|1428.368.peg.6018	18889.7	37524.5	25710.3	27518	14447.4	12801.1
691	fig|1428.368.peg.6054	4458.07	7054.07	2731.22	2950.22	17763.7	1784.47		691	fig|1428.368.peg.6054	6248.09	7226.79	2323.24	3573.88	14395.3	1659.52
692	fig|11428.3.peg.181	34869.9	106155	88144.8	143987	133444	79118.3		692	fig|11428.3.peg.181	48871	108755	74978	174425	108140	73578.2
693	fig|11428.3.peg.1609	27643	50253.3	54640.7	9186.83	86340.4	68648.5		693	fig|11428.3.peg.1609	38742.4	51483.8	46478.7	11128.9	69968.3	63841.6
694	fig|1428.368.peg.2904	13734.3	27002.4	34323.8	21103.9	16905.8	14833.7		694	fig|1428.368.peg.2904	19249	27663.5	29196.6	25565.2	13700.1	13795
695	fig|11428.3.peg.4973	16117.9	55294.7	30354.7	59191.2	47438.8	5685.7		695	fig|11428.3.peg.4973	22589.7	56648.6	25820.4	71704	38443.3	5287.57
696	fig|11428.3.peg.1766	9052.94	14299.8	12979	11169.5	28244.5	20316.6		696	fig|11428.3.peg.1766	12687.9	14649.9	11040.3	13530.7	22888.7	18893.9
697	fig|1428.368.peg.2661	4593.59	1388.87	10140.5	1370.16	26021	6128.07		697	fig|1428.368.peg.2661	6438.04	1422.87	8625.77	1659.81	21086.8	5698.96
698	fig|11428.3.peg.1373	16388.5	6615.45	22108.4	16891.4	23164.3	20232.6		698	fig|11428.3.peg.1373	22968.8	6777.43	18805.9	20462.2	18771.8	18815.9
699	fig|1428.368.peg.3360	27649	25035.4	31850.5	3.9762e+06	94795.3	762183		699	fig|1428.368.peg.3360	38750.8	25648.4	27092.8	4.81675e+06	76819.9	708813
700	fig|11428.3.peg.3551	28782	13594.1	34802	26050.8	74314.2	50354.5		700	fig|11428.3.peg.3551	40338.7	13926.9	29603.4	31557.8	60222.5	46828.6
701	fig|11428.3.peg.3554	10296.1	4397.74	14810.8	15084.2	27732.2	26997.3		701	fig|11428.3.peg.3554	14430.2	4505.42	12598.5	18273	22473.5	25106.9
702	fig|11428.3.peg.5236	16121.6	22971.2	22966.5	6732.98	83871.5	53638.5		702	fig|11428.3.peg.5236	22594.8	23533.6	19535.8	8156.31	67967.5	49882.6
703	fig|11428.3.peg.1813	29830	82287.2	86298.1	104540	180744	69074.7		703	fig|11428.3.peg.1813	41807.5	84302	73407.2	126640	146471	64238
704	fig|1428.368.peg.1829	3491.99	7921.38	7172.78	1349.41	8263.53	3446.36		704	fig|1428.368.peg.1829	4894.11	8115.34	6101.34	1634.68	6696.57	3205.04
705	fig|11428.3.peg.211	32807.4	91196.1	32853.2	60232.5	122135	70652.1		705	fig|11428.3.peg.211	45980.4	93429.1	27945.7	72965.4	98975	65704.8
706	fig|11428.3.peg.3220	76124	186951	172076	208853	521172	154089		706	fig|11428.3.peg.3220	106690	191528	146372	253004	422346	143300
707	fig|11428.3.peg.4319	6730.33	12881.4	19904.7	25307.3	14899	11246.8		707	fig|11428.3.peg.4319	9432.73	13196.8	16931.4	30657.2	12073.8	10459.2
708	fig|1428.368.peg.2804	2665.41	16927.7	3621.94	13904.2	28036.4	7719.43		708	fig|1428.368.peg.2804	3735.64	17342.2	3080.91	16843.5	22720	7178.9
709	fig|11428.3.peg.4725	16314.2	7940.99	46045.3	11539	39799.3	24414.7		709	fig|11428.3.peg.4725	22864.8	8135.43	39167.2	13978.3	32252.4	22705.2
710	fig|1428.368.peg.4056	5092.53	17391.9	3319.24	19048.7	28436.9	11415.5		710	fig|1428.368.peg.4056	7137.31	17817.7	2823.43	23075.5	23044.6	10616.1
711	fig|11428.3.peg.1937	2444.35	24510	41884.1	13967.7	24662.3	5679.62		711	fig|11428.3.peg.1937	3425.82	25110.1	35627.6	16920.4	19985.8	5281.92
712	fig|11428.3.peg.1512	4251.5	22564.4	4698.26	4064.64	10420.6	8975.73		712	fig|11428.3.peg.1512	5958.59	23116.8	3996.45	4923.89	8444.57	8347.23
713	fig|11428.3.peg.5146	6341.91	4794.29	6747.61	43968.9	26996.7	18128.3		713	fig|11428.3.peg.5146	8888.35	4911.67	5739.68	53263.8	21877.4	16858.9
714	fig|11428.3.peg.5560	5142.54	208.091	9406.68	171.933	8086.2	11469.9		714	fig|11428.3.peg.5560	7207.4	213.186	8001.54	208.278	6552.87	10666.8
715	fig|1428.368.peg.4152	1102.4	1299.64	2281.12	910.956	30339.4	13800.1		715	fig|1428.368.peg.4152	1545.04	1331.47	1940.37	1103.53	24586.3	12833.8
716	fig|1428.368.peg.6343	25503	92093.8	43292.3	128849	157133	42205.4		716	fig|1428.368.peg.6343	35743.2	94348.8	36825.4	156087	127337	39250.1
717	fig|11428.3.peg.3573	18000.5	51651.6	54975.2	27230.6	35321.3	13639.4		717	fig|11428.3.peg.3573	25228.2	52916.3	46763.2	32987.1	28623.6	12684.4
718	fig|11428.3.peg.2169	3837.62	2145.79	6233.47	8634.3	10866.9	17808.8		718	fig|11428.3.peg.2169	5378.53	2198.33	5302.33	10459.6	8806.25	16561.8
719	fig|1428.368.peg.3478	11134.1	203.585	1014.07	13763.4	32725.9	24453.8		719	fig|1428.368.peg.3478	15604.8	208.57	862.59	16672.9	26520.3	22741.5
720	fig|11428.3.peg.4522	17237.7	77468.7	30723.9	34481	110361	28680.5		720	fig|11428.3.peg.4522	24159.1	79365.5	26134.4	41770.2	89433.8	26672.2
721	fig|1428.368.peg.538	18825.6	26383.8	63134	15246.8	68101.1	28474.8		721	fig|1428.368.peg.538	26384.6	27029.8	53703.2	18470	55187.5	26481
722	fig|11428.3.peg.2648	55465.2	178377	122772	40000.8	42866.9	3113.11		722	fig|11428.3.peg.2648	77735.9	182745	104433	48456.9	34738.3	2895.12
723	fig|11428.3.peg.1209	44292	48153.6	60969.7	56982.6	130638	77656.7		723	fig|11428.3.peg.1209	62076.3	49332.7	51862.2	69028.5	105866	72218.9
724	fig|11428.3.peg.4166	13868	31479.7	23245.9	25557.6	68840.2	25903.1		724	fig|11428.3.peg.4166	19436.4	32250.5	19773.5	30960.3	55786.5	24089.3
725	fig|1428.368.peg.5590	48399.5	15385.7	64353.8	25496.3	75874.8	62300.8		725	fig|1428.368.peg.5590	67833.1	15762.4	54740.8	30886.2	61487.1	57938.4
726	fig|11428.3.peg.5782	15394.5	23515.9	12377.6	4687.78	44831.4	17940.5		726	fig|11428.3.peg.5782	21575.8	24091.7	10528.6	5678.76	36330.3	16684.2
727	fig|1428.368.peg.4397	3304.78	1448.72	880.304	2314.29	12535.2	11887.3		727	fig|1428.368.peg.4397	4631.73	1484.19	748.807	2803.52	10158.2	11055
728	fig|11428.3.peg.898	6256.37	8227.38	7909.35	6672.57	15704	7656.64		728	fig|11428.3.peg.898	8768.46	8428.82	6727.88	8083.12	12726.2	7120.5
729	fig|11428.3.peg.4422	29424.1	131559	25925.7	60953.9	145297	28376.8		729	fig|11428.3.peg.4422	41238.6	134780	22053	73839.4	117746	26389.8
730	fig|1428.368.peg.6315	32168.4	71807.1	19942.6	7243.34	43616.4	6092.65		730	fig|1428.368.peg.6315	45084.8	73565.3	16963.6	8774.55	35345.7	5666.03
731	fig|11428.3.peg.1771	85345.2	89893.4	122199	52133.1	232556	119436		731	fig|11428.3.peg.1771	119613	92094.5	103945	63153.9	188458	111072
732	fig|1428.368.peg.3136	24957.7	1253.31	36141.3	18485.2	38252.1	25449		732	fig|1428.368.peg.3136	34978.9	1284	30742.6	22392.9	30998.6	23667
733	fig|1428.368.peg.5479	5821.32	60306.5	16592.8	76661.3	246731	22034.3		733	fig|1428.368.peg.5479	8158.73	61783.1	14114.2	92867.2	199945	20491.4
734	fig|1428.368.peg.3615	2635.42	12098.1	6133.94	1642.83	19144.1	11368.8		734	fig|1428.368.peg.3615	3693.6	12394.4	5217.67	1990.12	15513.9	10572.7
735	fig|11428.3.peg.4523	16695.8	47805.6	40130.8	31881.3	25672.2	15504		735	fig|11428.3.peg.4523	23399.5	48976.1	34136.2	38620.9	20804.1	14418.4
736	fig|11428.3.peg.2549	33628	89835.8	61021.1	113748	155248	61951.9		736	fig|11428.3.peg.2549	47130.6	92035.4	51906	137794	125809	57613.9
737	fig|1428.368.peg.869	1746.47	10546.6	9503.65	19631.8	37765.8	13152.1		737	fig|1428.368.peg.869	2447.72	10804.9	8084.03	23781.9	30604.5	12231.1
738	fig|1428.368.peg.6099	12368.1	2064.18	12739.4	12154.8	15566.5	13406.8		738	fig|1428.368.peg.6099	17334.2	2114.72	10836.5	14724.2	12614.7	12468
739	fig|11428.3.peg.3945	19556.2	34846.9	24191.2	13982.6	44496.1	18735.5		739	fig|11428.3.peg.3945	27408.5	35700.1	20577.6	16938.5	36058.6	17423.6
740	fig|11428.3.peg.3397	5220.37	694.198	6890.25	258.509	15839.8	9302.77		740	fig|11428.3.peg.3397	7316.48	711.195	5861.01	313.156	12836.2	8651.37
741	fig|1428.368.peg.3886	11348.4	3359.4	19888.5	4546.68	45149.1	6953.6		741	fig|1428.368.peg.3886	15905.1	3441.66	16917.6	5507.83	36587.7	6466.7
742	fig|1428.368.peg.5849	2462.22	5823.19	10736	3466.94	18212.7	10093.1		742	fig|1428.368.peg.5849	3450.87	5965.77	9132.33	4199.84	14759.1	9386.34
743	fig|11428.3.peg.3186	3475.24	15946.9	6079.14	6790.7	8406.73	6640.72		743	fig|11428.3.peg.3186	4870.64	16337.4	5171.06	8226.23	6812.62	6175.72
744	fig|11428.3.peg.1279	7508.88	10359	8295.09	74164.3	78474.8	26305.4		744	fig|11428.3.peg.1279	10523.9	10612.7	7056	89842.4	63594.1	24463.4
745	fig|11428.3.peg.4423	10576.3	45471.8	17268.9	40089.2	15476.7	33631		745	fig|11428.3.peg.4423	14822.9	46585.2	14689.3	48563.9	12541.9	31276.1
746	fig|11428.3.peg.5839	8878.75	56123.8	20525.7	63961	48161.5	7910.49		746	fig|11428.3.peg.5839	12443.8	57498	17459.7	77482.1	39029	7356.57
747	fig|11428.3.peg.178	5545.14	16637.6	17301	29426	23975.2	39987.5		747	fig|11428.3.peg.178	7771.65	17045	14716.6	35646.6	19429	37187.5
748	fig|11428.3.peg.6123	18015.8	38289.4	21146.3	34573.1	57934	23542.4		748	fig|11428.3.peg.6123	25249.7	39226.9	17987.5	41881.7	46948.3	21893.9
749	fig|11428.3.peg.1718	4524.56	603.607	4789.21	4397.34	23130.5	1851.89		749	fig|11428.3.peg.1718	6341.28	618.386	4073.81	5326.93	18744.4	1722.21
750	fig|11428.3.peg.5148	3909.65	2451.06	3363.74	6117.96	2828.3	6331.54		750	fig|11428.3.peg.5148	5479.48	2511.08	2861.27	7411.27	2291.99	5888.19
751	fig|1428.368.peg.6101	2495.97	12867.4	1813.62	15335.8	17214.6	5242.63		751	fig|1428.368.peg.6101	3498.17	13182.5	1542.71	18577.8	13950.3	4875.53
752	fig|11428.3.peg.3288	14376.5	19923.2	4910.41	52643.1	18997.8	15672.3		752	fig|11428.3.peg.3288	20149	20411	4176.91	63771.6	15395.4	14574.9
753	fig|11428.3.peg.3970	10934	9699	6064.18	18178.2	7276.96	14722.8		753	fig|11428.3.peg.3970	15324.3	9936.48	5158.34	22021.1	5897.08	13691.8
754	fig|1428.368.peg.2697	7797.23	2184.47	9488.36	561.73	12095	3530.75		754	fig|1428.368.peg.2697	10928	2237.96	8071.02	680.477	9801.48	3283.52
755	fig|11428.3.peg.1284	3963.86	6923.01	6972.41	309.622	9284.63	4556.71		755	fig|11428.3.peg.1284	5555.44	7092.52	5930.89	375.075	7524.05	4237.64
756	fig|11428.3.peg.2929	10354.3	27636.8	16081.1	23785.2	17555.6	3263.05		756	fig|11428.3.peg.2929	14511.8	28313.5	13678.9	28813.3	14226.6	3034.56
757	fig|1428.368.peg.4003	11666.2	55127.1	16963.9	29751.8	6277.39	5882.19		757	fig|1428.368.peg.4003	16350.5	56476.8	14429.9	36041.2	5087.05	5470.31
758	fig|1428.368.peg.1738	10141.8	22811.2	17625.9	925.471	30438.7	13220.7		758	fig|1428.368.peg.1738	14213.9	23369.7	14993	1121.11	24666.8	12295
759	fig|11428.3.peg.3046	8163.23	19216.5	12161.9	6368.75	7990.52	513.605		759	fig|11428.3.peg.3046	11441	19687	10345.2	7715.08	6475.33	477.641
760	fig|11428.3.peg.1393	230886	12510.6	339256	12034.7	642121	249401		760	fig|11428.3.peg.1393	323592	12817	288579	14578.8	520359	231937
761	fig|11428.3.peg.3611	4657.2	2622.18	4707.56	16514.7	21207.7	432.53		761	fig|11428.3.peg.3611	6527.19	2686.38	4004.36	20005.8	17186.2	402.243
762	fig|11428.3.peg.2287	3582.64	14179.1	5420.5	30956.3	34727.1	554.182		762	fig|11428.3.peg.2287	5021.15	14526.3	4610.81	37500.4	28142	515.377
763	fig|1428.368.peg.3921	9866.84	330809	14624.6	463193	22885.3	1703.26		763	fig|1428.368.peg.3921	13828.6	338909	12440.1	561111	18545.7	1583.99
764	fig|1428.368.peg.4924	1114.31	5432.5	4163.51	392.1	33604.5	7401.71		764	fig|1428.368.peg.4924	1561.73	5565.52	3541.58	474.988	27232.3	6883.42
765	fig|1428.368.peg.752	734.299	27486.3	35002.1	3664.57	45355.5	1759.91		765	fig|1428.368.peg.752	1029.14	28159.3	29773.6	4439.25	36755	1636.68
766	fig|1428.368.peg.4968	6898.3	19977.4	3043.78	184765	362109	4590.1		766	fig|1428.368.peg.4968	9668.14	20466.6	2589.11	223823	293445	4268.69
767	fig|1428.368.peg.5105	4584.99	16942.4	16001.6	21188.1	38035.7	171077		767	fig|1428.368.peg.5105	6425.98	17357.3	13611.4	25667.2	30823.2	159097
768	fig|11428.3.peg.568	9846.01	2888.72	13568.4	8492.91	35701	5615.26		768	fig|11428.3.peg.568	13799.4	2959.45	11541.6	10288.3	28931.3	5222.07
769	fig|11428.3.peg.5206	878.829	10797.2	3591.28	12572.5	12722.6	1195.54		769	fig|11428.3.peg.5206	1231.7	11061.6	3054.83	15230.3	10310.1	1111.83
770	fig|11428.3.peg.2332	8897.16	27991	3705.25	35802.4	43584.3	9416.54		770	fig|11428.3.peg.2332	12469.6	28676.3	3151.77	43370.8	35319.7	8757.17
771	fig|11428.3.peg.3776	29611.5	60816.4	13687.9	61743	16354.4	17017.8		771	fig|11428.3.peg.3776	41501.2	62305.5	11643.2	74795.3	13253.2	15826.2
772	fig|1428.368.peg.2219	793.738	97978	876.491	71315.5	5841.61	1857.99		772	fig|1428.368.peg.2219	1112.44	100377	745.563	86391.4	4733.9	1727.89
773	fig|11428.3.peg.1409	3333.86	691.457	725.402	1445.95	3137.81	1567.82		773	fig|11428.3.peg.1409	4672.49	708.388	617.044	1751.61	2542.81	1458.04
774	fig|11428.3.peg.3644	1145.55	3659.87	1088.54	11677.5	19705.7	1679.08		774	fig|11428.3.peg.3644	1605.51	3749.48	925.939	14146.1	15969	1561.51
775	fig|11428.3.peg.3206	2304.3	26478.4	10769.1	31389.5	25132.3	2386.9		775	fig|11428.3.peg.3206	3229.53	27126.7	9160.43	38025.1	20366.6	2219.76
776	fig|1428.368.peg.4971	5717.29	3133.95	2979.95	8059.22	27642.4	24663.9		776	fig|1428.368.peg.4971	8012.93	3210.68	2534.82	9762.91	22400.7	22936.9
777	fig|11428.3.peg.5263	2685.43	19835.3	1551.74	17078.6	14781.2	2416.35		777	fig|11428.3.peg.5263	3763.7	20321	1319.94	20689	11978.3	2247.15
778	fig|11428.3.peg.3656	1485.66	14425.1	16587.5	9407.7	5000.61	332.865		778	fig|11428.3.peg.3656	2082.19	14778.3	14109.7	11396.5	4052.37	309.557
779	fig|11428.3.peg.3001	7664.46	2308.77	7964.7	7522.6	11734.9	5150.21		779	fig|11428.3.peg.3001	10741.9	2365.31	6774.96	9112.85	9509.65	4789.58
780	fig|11428.3.peg.5576	7956.56	20611.1	14004.5	6420.23	15038	2137.95		780	fig|11428.3.peg.5576	11151.3	21115.8	11912.6	7777.45	12186.4	1988.25
781	fig|11428.3.peg.4712	483.159	2733.17	728.084	8033.96	5722.78	11074.9		781	fig|11428.3.peg.4712	677.16	2800.09	619.325	9732.31	4637.6	10299.4
782	fig|11428.3.peg.4999	5891.67	21910.5	8620.71	9573.06	11310.7	7026.64		782	fig|11428.3.peg.4999	8257.32	22447	7332.98	11596.8	9165.92	6534.61
783	fig|11428.3.peg.4424	224383	447369	268587	437164	459985	44662.5		783	fig|11428.3.peg.4424	314479	458322	228467	529579	372761	41535.1
784	fig|1428.368.peg.4423	190.953	13457.4	550.544	8005.23	8031.07	181.707		784	fig|1428.368.peg.4423	267.626	13786.9	468.305	9697.51	6508.19	168.984
785	fig|11428.3.peg.994	13458.6	75959.2	37029.5	91459.6	67967.9	11649.9		785	fig|11428.3.peg.994	18862.5	77819.1	31498.1	110794	55079.6	10834.2
786	fig|1428.368.peg.5143	3193.48	7181.25	2505.29	1134.86	2673.75	850.461		786	fig|1428.368.peg.5143	4475.74	7357.08	2131.06	1374.76	2166.74	790.91
787	fig|11428.3.peg.1476	1830.43	24999.7	11532.7	52826.4	40860.7	1644.09		787	fig|11428.3.peg.1476	2565.39	25611.8	9810.02	63993.7	33112.5	1528.97
788	fig|1428.368.peg.2685	3884.88	225.579	2899.75	433.327	6907.03	176.46		788	fig|1428.368.peg.2685	5444.75	231.102	2466.59	524.931	5597.29	164.104
789	fig|1428.368.peg.2673	2374.64	572.607	3049.98	2585.13	11985.8	5583.57		789	fig|1428.368.peg.2673	3328.11	586.627	2594.39	3131.62	9713.04	5192.6
790	fig|11428.3.peg.4392	7423.93	5815.23	5568.96	4646.85	6340.39	2868.53		790	fig|11428.3.peg.4392	10404.8	5957.61	4737.08	5629.17	5138.1	2667.67
791	fig|11428.3.peg.614	14164.5	18557.5	16149.8	49092.2	31379.1	18499.3		791	fig|11428.3.peg.614	19851.9	19011.9	13737.4	59470.1	25428.9	17204
792	fig|1428.368.peg.2545	726.46	121.092	1052.05	589.975	1374.8	1227.15		792	fig|1428.368.peg.2545	1018.15	124.057	894.901	714.694	1114.1	1141.22
793	fig|11428.3.peg.6122	3000.41	20602.5	2550.84	30458.7	36854.5	6650.54		793	fig|11428.3.peg.6122	4205.16	21107	2169.8	36897.6	29866	6184.86
794	fig|11428.3.peg.3174	3387.87	10531.7	2619.44	11499	9112.07	3513.7		794	fig|11428.3.peg.3174	4748.19	10789.6	2228.16	13929.8	7384.21	3267.66
795	fig|11428.3.peg.2464	3127.55	18679.5	5947.26	40197.7	17576.9	9956.92		795	fig|11428.3.peg.2464	4383.34	19136.8	5058.88	48695.4	14243.9	9259.71
796	fig|1428.368.peg.777	4811.96	1810.54	2665.33	3389.47	40163.8	17184.3		796	fig|1428.368.peg.777	6744.08	1854.87	2267.19	4106	32547.8	15981
[truncated: 79 more rows]

## Sheet: EPCA areas norm
Table S5.5 Grouping analysis of the corrected peak areas values by totalareasum.
[truncated: 876 more rows]

## Sheet: E24v48 
Table S5.6 Proteins different expressed in the supernatant of Bt isoalte E-SE10.2 at 24h vs 48 h		39
[truncated: 887 more rows]

[truncated: 5 more sheets: ProtsumO24v48, PepsumO24v48, Areas O-V84.2, OPCA areas norm, O24v48]
