# Supplementary material for: A Genomic and Proteomic Approach to Identify and Quantify the Expressed Bacillus thuringiensis Proteins in the Supernatant and Parasporal Crystal
Source: Toxins (Basel). 2018 May 10;10(5):193. doi: 10.3390/toxins10050193 (PMC5983249; doi:10.3390/toxins10050193)
Supplement: Supplementary file 1 [file toxins-10-00193-s001.zip › Table S5.xlsx]

## Sheet: Proteinsummary
Table S4.1. Protein summary of the global search with the supernatants and solubilized proteins from spore/crystal mixtures with Protein Pilot v4.5
N	Unused	Total	%Cov	%Cov(50)	%Cov(95)	Accession	Name	Peptides(95%)
1	309.6	309.6	99.73	99.46	99.46	fig|1428.368.peg.1048	fig|1428.368.peg.1048	644
2	249.04	249.04	83.17	82.58	82.06	fig|1428.368.peg.1765	fig|1428.368.peg.1765	261
3	144.19	144.19	91.18	89.71	89.71	fig|11428.3.peg.2649	fig|11428.3.peg.2649	119
4	142.41	142.41	76.77	76.42	76.42	fig|11428.3.peg.1595	fig|11428.3.peg.1595	97
5	141.73	150.29	71.27	67.73	66.32	fig|1428.368.peg.1846	fig|1428.368.peg.1846	95
6	138.12	138.12	81.93	77.81	76.7	fig|11428.3.peg.4825	fig|11428.3.peg.4825	81
7	134.56	134.56	86.04	85.17	85.17	fig|1428.368.peg.712	fig|1428.368.peg.712	128
8	132.34	132.34	92.25	85.82	85.82	fig|11428.3.peg.4	fig|11428.3.peg.4	149
9	128.78	130.78	77.96	76.68	76.68	fig|1428.368.peg.4931	fig|1428.368.peg.4931	123
10	123.07	123.07	90.61	83.38	82.37	fig|11428.3.peg.1963	fig|11428.3.peg.1963	83
11	121.9	121.9	97.91	97.91	97.91	fig|11428.3.peg.2209	fig|11428.3.peg.2209	90
12	119.87	119.87	64.71	53.95	51.84	fig|1428.368.peg.1087	fig|1428.368.peg.1087	81
13	116.39	116.39	50.81	44.69	44.69	fig|11428.3.peg.1958	fig|11428.3.peg.1958	63
14	115.59	117.61	72.57	69.56	69.56	fig|11428.3.peg.1597	fig|11428.3.peg.1597	83
15	109.48	217.68	99.73	99.73	99.73	fig|11428.3.peg.2783	fig|11428.3.peg.2783	407
16	104.09	104.09	95.15	95.15	95.15	fig|11428.3.peg.70	fig|11428.3.peg.70	134
17	103.84	103.84	79.01	78.05	77.86	fig|11428.3.peg.4831	fig|11428.3.peg.4831	55
18	102.27	102.27	76.38	71.52	68.9	fig|1428.368.peg.2741	fig|1428.368.peg.2741	63
19	102.01	102.01	90.49	87.32	85.84	fig|11428.3.peg.2174	fig|11428.3.peg.2174	62
20	100.35	100.35	70.87	69.72	68.25	fig|1428.368.peg.5202	fig|1428.368.peg.5202	62
21	100.3	100.3	31.86	21.54	19.3	fig|1428.368.peg.3386	fig|1428.368.peg.3386	59
22	99.71	99.71	79.1	78.07	78.07	fig|11428.3.peg.2069	fig|11428.3.peg.2069	85
23	99.24	99.24	77.98	75.5	75.5	fig|1428.368.peg.6270	fig|1428.368.peg.6270	82
24	96.92	96.92	84.47	83.3	83.3	fig|11428.3.peg.4925	fig|11428.3.peg.4925	60
25	94.22	94.22	53.45	45.14	40.73	fig|11428.3.peg.1959	fig|11428.3.peg.1959	53
26	93.28	93.28	63.5	54.38	53.14	fig|11428.3.peg.1938	fig|11428.3.peg.1938	51
27	90.74	90.74	23.25	18.96	15.91	fig|11428.3.peg.5200	fig|11428.3.peg.5200	46
28	87.97	87.97	93.67	93.42	91.39	fig|11428.3.peg.1964	fig|11428.3.peg.1964	64
29	87.91	87.91	49.39	44.69	42.6	fig|11428.3.peg.3356	fig|11428.3.peg.3356	51
30	87.49	87.49	69.1	64.89	63.62	fig|11428.3.peg.3215	fig|11428.3.peg.3215	49
31	86.95	86.95	75.76	71.55	69.87	fig|11428.3.peg.5059	fig|11428.3.peg.5059	57
32	85.58	85.58	75	70.56	67.59	fig|11428.3.peg.5599	fig|11428.3.peg.5599	50
33	84.92	84.92	79.63	76.34	76.34	fig|11428.3.peg.2213	fig|11428.3.peg.2213	58
34	84.88	86.89	66.99	59.61	56.46	fig|11428.3.peg.3127	fig|11428.3.peg.3127	46
35	84.81	84.81	93.82	93.01	91.13	fig|11428.3.peg.446	fig|11428.3.peg.446	55
36	84.07	84.07	93.74	93.74	93.74	fig|1428.368.peg.5535	fig|1428.368.peg.5535	56
37	83.96	83.96	85.15	82.47	81.24	fig|1428.368.peg.3608	fig|1428.368.peg.3608	58
38	82.27	82.27	67.65	60.05	57.78	fig|11428.3.peg.2715	fig|11428.3.peg.2715	49
39	80.77	80.77	27.79	24.75	21.87	fig|11428.3.peg.5201	fig|11428.3.peg.5201	40
40	79.96	79.96	52.48	48.29	47.52	fig|11428.3.peg.1625	fig|11428.3.peg.1625	46
41	78.79	78.79	49.42	46.33	46.33	fig|1428.368.peg.1527	fig|1428.368.peg.1527	53
42	78.73	78.73	50.71	46.55	45.32	fig|1428.368.peg.1195	fig|1428.368.peg.1195	43
43	78.23	78.23	60.53	59.38	59.38	fig|11428.3.peg.2032	fig|11428.3.peg.2032	52
44	77.15	77.15	86.89	86.89	86.89	fig|11428.3.peg.4662	fig|11428.3.peg.4662	67
45	76.72	76.72	79.91	77.48	77.48	fig|11428.3.peg.2567	fig|11428.3.peg.2567	71
46	76.52	76.52	52.96	51.7	51.45	fig|1428.368.peg.426	fig|1428.368.peg.426	52
47	76.48	76.48	66.33	62.83	61.67	fig|1428.368.peg.5290	fig|1428.368.peg.5290	48
48	75.25	85.48	69.6	64.23	60.51	fig|1428.368.peg.6268	fig|1428.368.peg.6268	71
49	74.91	74.91	81.24	80.17	80.17	fig|1428.368.peg.3333	fig|1428.368.peg.3333	58
50	74.32	74.32	74.26	64.68	64.68	fig|1428.368.peg.2705	fig|1428.368.peg.2705	62
50	0	74.32	74.26	64.68	64.68	fig|11428.3.peg.3378	fig|11428.3.peg.3378	62
51	72.77	72.77	65.79	59.87	59.87	fig|1428.368.peg.3511	fig|1428.368.peg.3511	54
52	71.48	71.48	49.47	46.64	45.58	fig|1428.368.peg.765	fig|1428.368.peg.765	77
53	70.01	70.01	75.43	69.13	67.61	fig|1428.368.peg.3265	fig|1428.368.peg.3265	44
54	67.18	80.91	58.8	52.63	52.63	fig|11428.3.peg.2045	fig|11428.3.peg.2045	50
55	66.36	66.36	70	68.22	68.22	fig|1428.368.peg.999	fig|1428.368.peg.999	59
56	65.94	102.58	87.78	81.15	81.15	fig|1428.368.peg.939	fig|1428.368.peg.939	91
57	65.32	65.32	58.57	51.39	50.2	fig|1428.368.peg.3335	fig|1428.368.peg.3335	42
57	0	65.32	56.57	51.39	50.2	fig|11428.3.peg.4559	fig|11428.3.peg.4559	42
58	64.88	64.88	77.49	75.83	74.64	fig|11428.3.peg.3379	fig|11428.3.peg.3379	38
59	64.34	64.34	68.68	64.26	64.26	fig|11428.3.peg.1897	fig|11428.3.peg.1897	39
60	63.25	63.25	70.61	70.61	70.19	fig|11428.3.peg.4664	fig|11428.3.peg.4664	52
61	62	62	65.34	62.12	62.12	fig|1428.368.peg.5976	fig|1428.368.peg.5976	41
62	61.21	61.21	76.32	73.08	73.08	fig|11428.3.peg.2474	fig|11428.3.peg.2474	41
63	60.67	60.67	79.61	73.61	69.31	fig|11428.3.peg.4505	fig|11428.3.peg.4505	41
64	60.04	60.04	89.34	84.26	83.76	fig|11428.3.peg.4957	fig|11428.3.peg.4957	35
65	59.5	59.5	66.12	63.77	63.77	fig|1428.368.peg.1631	fig|1428.368.peg.1631	40
66	59.41	84.03	77.58	68.3	65.15	fig|11428.3.peg.1596	fig|11428.3.peg.1596	59
67	58.75	65.63	71.79	58.23	53.16	fig|11428.3.peg.1498	fig|11428.3.peg.1498	37
68	58.5	58.5	58.73	55.85	51.33	fig|11428.3.peg.2315	fig|11428.3.peg.2315	35
69	58.07	58.07	56.78	52.94	52.94	fig|11428.3.peg.3438	fig|11428.3.peg.3438	38
70	57.62	57.62	64.93	59.52	50.3	fig|11428.3.peg.5725	fig|11428.3.peg.5725	31
71	57.35	57.35	73.21	72.94	72.94	fig|11428.3.peg.5528	fig|11428.3.peg.5528	48
72	56.45	56.45	52.7	49.91	47.48	fig|11428.3.peg.118	fig|11428.3.peg.118	30
73	56.22	56.22	60.59	60.59	60.14	fig|11428.3.peg.685	fig|11428.3.peg.685	40
74	55.64	55.64	62.23	56.38	55.32	fig|11428.3.peg.787	fig|11428.3.peg.787	34
75	55.49	55.49	68.16	63.46	61.75	fig|11428.3.peg.3958	fig|11428.3.peg.3958	31
76	55.35	55.35	69.5	69.5	69.5	fig|11428.3.peg.5677	fig|11428.3.peg.5677	38
77	55.1	55.1	55.81	46.46	44.06	fig|11428.3.peg.4171	fig|11428.3.peg.4171	32
78	55.07	55.07	57.03	56.44	56.44	fig|11428.3.peg.1012	fig|11428.3.peg.1012	31
79	54.31	54.31	65.83	52.43	51.76	fig|11428.3.peg.5228	fig|11428.3.peg.5228	29
80	54.17	54.17	61.86	60.7	59.3	fig|1428.368.peg.1670	fig|1428.368.peg.1670	30
81	53.87	53.87	45.65	40.48	36.82	fig|11428.3.peg.5056	fig|11428.3.peg.5056	31
82	53.17	53.17	55.98	55.22	54.2	fig|1428.368.peg.3373	fig|1428.368.peg.3373	29
83	52.93	52.93	22.64	15.38	13.35	fig|11428.3.peg.5211	fig|11428.3.peg.5211	28
84	52.81	52.81	64.89	58	53.33	fig|11428.3.peg.6	fig|11428.3.peg.6	28
85	52.78	52.78	53.79	47.12	45	fig|11428.3.peg.5764	fig|11428.3.peg.5764	31
86	52.44	52.44	75	65.93	65.93	fig|11428.3.peg.6139	fig|11428.3.peg.6139	28
87	51.67	51.67	55.19	55.19	50.31	fig|11428.3.peg.1456	fig|11428.3.peg.1456	29
88	51.27	51.27	87.91	82.05	82.05	fig|1428.368.peg.6440	fig|1428.368.peg.6440	42
89	50.45	50.45	80.57	78.76	76.94	fig|1428.368.peg.1346	fig|1428.368.peg.1346	37
90	50.15	50.15	66.82	65.19	65.19	fig|11428.3.peg.3234	fig|11428.3.peg.3234	31
91	50.11	50.11	55.52	52.31	50.89	fig|11428.3.peg.2955	fig|11428.3.peg.2955	31
92	50.04	50.04	85.11	84.89	83.56	fig|11428.3.peg.5686	fig|11428.3.peg.5686	27
93	49.98	49.98	55.94	54.64	52.92	fig|11428.3.peg.3192	fig|11428.3.peg.3192	28
93	0	47.95	52.7	51.4	49.68	fig|1428.368.peg.3918	fig|1428.368.peg.3918	27
94	49.82	49.82	71.7	67.69	67.69	fig|11428.3.peg.3233	fig|11428.3.peg.3233	36
95	49.67	49.67	65.11	57.14	57.14	fig|11428.3.peg.5409	fig|11428.3.peg.5409	26
96	49.4	49.4	41.92	36.33	30.74	fig|11428.3.peg.4414	fig|11428.3.peg.4414	25
96	0	48.03	41.19	36.33	29.28	fig|1428.368.peg.4266	fig|1428.368.peg.4266	24
97	49.19	49.19	49.28	41.61	41.35	fig|1428.368.peg.2867	fig|1428.368.peg.2867	25
98	49	49	58.04	53.15	50.35	fig|11428.3.peg.4387	fig|11428.3.peg.4387	29
98	0	46.93	53.61	48.72	45.92	fig|1428.368.peg.4239	fig|1428.368.peg.4239	28
99	48.92	48.92	98.08	98.08	98.08	fig|1428.368.peg.4219	fig|1428.368.peg.4219	54
100	48.85	48.85	71.21	68.12	68.12	fig|11428.3.peg.458	fig|11428.3.peg.458	32
101	48.67	48.67	42.02	36.33	35.23	fig|11428.3.peg.5737	fig|11428.3.peg.5737	29
102	48.62	48.62	61.54	54.7	53.33	fig|11428.3.peg.5908	fig|11428.3.peg.5908	27
103	48.37	48.37	77.55	76.53	69.73	fig|11428.3.peg.3	fig|11428.3.peg.3	38
104	48.35	48.35	73.55	70.53	70.53	fig|1428.368.peg.3431	fig|1428.368.peg.3431	36
105	48.24	48.24	68.93	64.49	63.79	fig|1428.368.peg.4721	fig|1428.368.peg.4721	31
105	0	48.24	68.93	64.49	63.79	fig|11428.3.peg.939	fig|11428.3.peg.939	31
106	47.9	47.9	76.22	76.22	76.22	fig|11428.3.peg.5734	fig|11428.3.peg.5734	28
107	47.89	47.89	56.32	55.22	53.3	fig|11428.3.peg.2690	fig|11428.3.peg.2690	28
108	47.41	47.41	55.75	49.3	44.43	fig|11428.3.peg.5707	fig|11428.3.peg.5707	23
109	47.39	47.39	59.89	55.94	54.68	fig|11428.3.peg.4500	fig|11428.3.peg.4500	26
110	47.26	47.26	68.18	59.09	59.09	fig|11428.3.peg.5676	fig|11428.3.peg.5676	31
111	47.21	47.21	70.61	70.61	70.61	fig|11428.3.peg.2212	fig|11428.3.peg.2212	28
112	47.09	47.09	45.05	34.41	29.08	fig|11428.3.peg.4966	fig|11428.3.peg.4966	25
113	46.88	46.88	54.72	43.87	42.92	fig|11428.3.peg.2319	fig|11428.3.peg.2319	25
114	46.8	46.8	56.48	55.16	51.87	fig|11428.3.peg.5656	fig|11428.3.peg.5656	30
115	46.11	46.11	38.75	34.86	34.86	fig|11428.3.peg.5022	fig|11428.3.peg.5022	37
116	46	46	48	45.18	45.18	fig|11428.3.peg.2099	fig|11428.3.peg.2099	27
117	45.87	45.87	70.55	61.86	61.86	fig|11428.3.peg.1863	fig|11428.3.peg.1863	32
118	45.81	45.81	100	100	100	fig|1428.368.peg.4584	fig|1428.368.peg.4584	35
118	0	45.81	100	100	100	fig|11428.3.peg.5185	fig|11428.3.peg.5185	35
119	44.93	44.93	71.57	59.39	57.36	fig|11428.3.peg.1670	fig|11428.3.peg.1670	26
120	44.9	44.9	69.07	63.02	59.77	fig|11428.3.peg.5913	fig|11428.3.peg.5913	25
121	44.74	44.74	57.68	50.59	50.59	fig|1428.368.peg.4585	fig|1428.368.peg.4585	31
122	44.66	44.66	63.68	63.18	63.18	fig|1428.368.peg.1347	fig|1428.368.peg.1347	31
123	44.38	49.65	45.59	39.8	36.78	fig|1428.368.peg.3074	fig|1428.368.peg.3074	29
124	44.32	44.32	34.87	34.57	33.23	fig|1428.368.peg.2277	fig|1428.368.peg.2277	25
125	44.17	44.17	85.06	70.73	70.73	fig|1428.368.peg.52	fig|1428.368.peg.52	35
126	44.11	44.11	79.49	77.24	71.79	fig|1428.368.peg.3406	fig|1428.368.peg.3406	25
127	44.09	44.09	56.79	52.04	50.45	fig|1428.368.peg.2685	fig|1428.368.peg.2685	22
127	0	44.09	56.79	52.04	50.45	fig|11428.3.peg.3360	fig|11428.3.peg.3360	22
128	43.9	48.17	94.89	94.89	94.89	fig|1428.368.peg.6442	fig|1428.368.peg.6442	38
129	43.62	43.62	27.54	18.34	17.39	fig|11428.3.peg.4150	fig|11428.3.peg.4150	24
130	43.58	43.58	68.03	66.39	64.48	fig|11428.3.peg.1454	fig|11428.3.peg.1454	24
131	43.46	43.46	28.22	22.03	21.25	fig|1428.368.peg.5866	fig|1428.368.peg.5866	22
132	43.32	43.32	74.58	71.86	71.86	fig|1428.368.peg.1214	fig|1428.368.peg.1214	30
133	43.15	43.15	51.44	42.97	35.4	fig|11428.3.peg.2833	fig|11428.3.peg.2833	22
134	43.03	43.03	49.39	45.04	45.04	fig|11428.3.peg.2375	fig|11428.3.peg.2375	24
135	43.03	43.03	65.34	60.36	59.76	fig|1428.368.peg.3627	fig|1428.368.peg.3627	32
136	42.99	42.99	72.1	70.29	65.22	fig|11428.3.peg.5480	fig|11428.3.peg.5480	25
137	42.66	82.46	66.67	63.14	58.38	fig|1428.368.peg.1689	fig|1428.368.peg.1689	51
138	42.17	42.17	71.12	60.25	57.45	fig|11428.3.peg.1177	fig|11428.3.peg.1177	24
139	41.84	41.84	52.3	52.3	49.15	fig|11428.3.peg.6125	fig|11428.3.peg.6125	28
140	41.64	41.64	52.78	40.56	37.22	fig|11428.3.peg.1494	fig|11428.3.peg.1494	31
141	41.63	41.64	56.9	49.01	44.33	fig|11428.3.peg.2866	fig|11428.3.peg.2866	23
142	41.49	41.49	44.5	43.98	43.98	fig|11428.3.peg.947	fig|11428.3.peg.947	24
143	41.37	41.37	46.76	39.03	34.35	fig|11428.3.peg.3224	fig|11428.3.peg.3224	22
144	41.24	41.24	50.93	46.58	46.58	fig|11428.3.peg.4908	fig|11428.3.peg.4908	26
145	41.08	42.12	61.74	61.26	56.17	fig|11428.3.peg.4550	fig|11428.3.peg.4550	22
146	40.97	40.97	74.31	60.07	57.64	fig|11428.3.peg.3262	fig|11428.3.peg.3262	23
147	40.66	40.66	47.01	43.3	40.82	fig|11428.3.peg.1944	fig|11428.3.peg.1944	24
148	40.62	40.62	52.31	48.46	46.92	fig|11428.3.peg.448	fig|11428.3.peg.448	26
149	40.56	40.56	44.92	42.89	42.89	fig|1428.368.peg.4739	fig|1428.368.peg.4739	25
150	40.38	40.38	65.91	65.91	62.5	fig|11428.3.peg.5162	fig|11428.3.peg.5162	23
151	40.31	40.31	54.96	52.06	50.12	fig|11428.3.peg.3217	fig|11428.3.peg.3217	23
152	40.16	40.16	71.72	70.49	70.49	fig|11428.3.peg.5626	fig|11428.3.peg.5626	31
153	40.11	40.11	76.26	68.95	68.95	fig|11428.3.peg.1972	fig|11428.3.peg.1972	23
154	40.03	40.03	62.73	60.37	58.79	fig|11428.3.peg.6020	fig|11428.3.peg.6020	23
155	39.85	39.85	69.77	66.86	66.86	fig|11428.3.peg.5675	fig|11428.3.peg.5675	25
156	39.57	39.57	76.52	66.4	66.4	fig|11428.3.peg.4476	fig|11428.3.peg.4476	26
157	39.55	39.55	82.46	80.92	80.92	fig|11428.3.peg.5223	fig|11428.3.peg.5223	22
158	38.95	38.95	59.85	55.56	51.77	fig|1428.368.peg.785	fig|1428.368.peg.785	21
159	38.8	38.8	47.48	44.49	44.49	fig|11428.3.peg.4526	fig|11428.3.peg.4526	21
160	38.76	38.76	53.01	52.82	52.82	fig|1428.368.peg.859	fig|1428.368.peg.859	21
161	38.68	38.68	40.18	36.04	35.86	fig|11428.3.peg.3387	fig|11428.3.peg.3387	23
162	38.63	68.65	26.54	16.95	14.39	fig|11428.3.peg.4506	fig|11428.3.peg.4506	39
163	38.21	38.9	56.32	51.1	47.8	fig|1428.368.peg.78	fig|1428.368.peg.78	21
164	38.16	38.16	41.2	33.89	32.39	fig|11428.3.peg.2673	fig|11428.3.peg.2673	21
165	38.16	38.16	44.44	40.59	39.23	fig|11428.3.peg.3802	fig|11428.3.peg.3802	20
166	38.04	38.04	58.84	55.56	55.56	fig|1428.368.peg.4888	fig|1428.368.peg.4888	26
167	38.02	38.02	89.8	87.76	87.76	fig|1428.368.peg.2304	fig|1428.368.peg.2304	28
168	37.93	37.93	31.37	24.2	22.31	fig|11428.3.peg.6129	fig|11428.3.peg.6129	20
169	37.86	37.86	42.95	41.41	41.41	fig|11428.3.peg.4910	fig|11428.3.peg.4910	22
170	37.84	37.84	46.62	46.62	45.11	fig|11428.3.peg.4017	fig|11428.3.peg.4017	21
171	37.78	37.78	55.22	46.4	46.4	fig|11428.3.peg.4325	fig|11428.3.peg.4325	23
172	37.5	37.5	50.39	45.12	43.75	fig|11428.3.peg.268	fig|11428.3.peg.268	22
173	37.4	39.43	43.87	30.13	30.13	fig|1428.368.peg.1872	fig|1428.368.peg.1872	23
174	37.31	37.31	61.61	61.61	61.61	fig|11428.3.peg.4477	fig|11428.3.peg.4477	21
175	37.16	37.16	49.86	49.86	49.86	fig|1428.368.peg.6174	fig|1428.368.peg.6174	25
175	0	37.16	49.86	49.86	49.86	fig|11428.3.peg.5936	fig|11428.3.peg.5936	25
176	36.96	36.96	40.58	35.1	34.25	fig|11428.3.peg.1785	fig|11428.3.peg.1785	21
177	36.76	36.76	41.7	33.4	30.77	fig|11428.3.peg.5709	fig|11428.3.peg.5709	24
177	0.04	36.76	40.49	33.4	30.77	fig|1428.368.peg.5733	fig|1428.368.peg.5733	24
178	36.55	36.55	86.45	86.45	84.06	fig|1428.368.peg.5533	fig|1428.368.peg.5533	23
178	0	36.55	86.45	86.45	84.06	fig|11428.3.peg.4958	fig|11428.3.peg.4958	23
179	36.07	36.07	57.07	55.24	53.14	fig|11428.3.peg.5912	fig|11428.3.peg.5912	21
180	36.04	41.61	71.38	70.26	70.26	fig|1428.368.peg.5334	fig|1428.368.peg.5334	37
181	35.95	35.95	28.93	21.57	21.57	fig|11428.3.peg.3993	fig|11428.3.peg.3993	19
182	35.63	35.63	54.04	49.79	47.87	fig|1428.368.peg.1805	fig|1428.368.peg.1805	25
183	35.38	35.38	40.27	35.84	35.45	fig|11428.3.peg.3614	fig|11428.3.peg.3614	18
184	35.37	35.37	29.8	26.56	24.56	fig|11428.3.peg.4268	fig|11428.3.peg.4268	19
185	35.3	35.3	52.15	46.68	41.21	fig|1428.368.peg.6367	fig|1428.368.peg.6367	20
185	0	35.3	50.2	46.68	41.21	fig|11428.3.peg.2652	fig|11428.3.peg.2652	20
186	35.05	35.05	45.98	35.56	34.36	fig|1428.368.peg.3865	fig|1428.368.peg.3865	20
187	34.89	34.89	47.72	47.72	47.72	fig|11428.3.peg.3502	fig|11428.3.peg.3502	20
188	34.86	34.86	34.69	31.05	29.01	fig|11428.3.peg.3209	fig|11428.3.peg.3209	17
189	34.55	34.55	28.3	23.75	21.93	fig|11428.3.peg.1754	fig|11428.3.peg.1754	17
190	34.51	34.51	64.73	64.73	64.73	fig|1428.368.peg.3888	fig|1428.368.peg.3888	24
191	34.37	34.37	83.75	75.27	75.27	fig|11428.3.peg.4521	fig|11428.3.peg.4521	26
192	34.32	34.32	38.19	34.64	33.04	fig|11428.3.peg.108	fig|11428.3.peg.108	20
193	34.27	42.11	65.93	59.89	59.89	fig|1428.368.peg.1102	fig|1428.368.peg.1102	25
194	34.05	34.05	67.65	62.25	62.25	fig|11428.3.peg.5259	fig|11428.3.peg.5259	19
195	33.94	33.94	83.33	83.33	81.16	fig|11428.3.peg.6146	fig|11428.3.peg.6146	19
196	33.66	33.66	46.53	45.41	45.41	fig|11428.3.peg.1455	fig|11428.3.peg.1455	20
197	33.55	33.55	73.37	63.91	62.13	fig|11428.3.peg.5175	fig|11428.3.peg.5175	28
198	33.54	33.54	57.81	57.26	53.42	fig|1428.368.peg.6130	fig|1428.368.peg.6130	17
198	0	33.36	57.81	55.07	53.42	fig|11428.3.peg.5891	fig|11428.3.peg.5891	17
199	33.27	33.27	28.75	21.37	21.25	fig|1428.368.peg.4822	fig|1428.368.peg.4822	20
200	33.21	33.21	45.38	38.9	36.54	fig|11428.3.peg.4959	fig|11428.3.peg.4959	20
201	32.99	33.04	72.22	70.56	70	fig|1428.368.peg.3861	fig|1428.368.peg.3861	23
201	0	33.04	72.22	70.56	70	fig|11428.3.peg.3251	fig|11428.3.peg.3251	23
202	32.96	32.96	61.4	56.53	54.1	fig|11428.3.peg.5714	fig|11428.3.peg.5714	22
202	0	30.9	61.4	51.67	49.24	fig|1428.368.peg.5728	fig|1428.368.peg.5728	21
203	32.88	32.88	48.82	44.55	41.94	fig|11428.3.peg.2888	fig|11428.3.peg.2888	21
204	32.65	32.65	42.2	39.25	39.25	fig|11428.3.peg.4680	fig|11428.3.peg.4680	18
204	0	32.65	40.86	39.25	39.25	fig|1428.368.peg.2890	fig|1428.368.peg.2890	18
205	32.3	32.3	53.3	49.28	49.28	fig|11428.3.peg.3353	fig|11428.3.peg.3353	19
206	32.25	33.63	61.07	54.03	50	fig|1428.368.peg.5074	fig|1428.368.peg.5074	17
207	32.19	32.19	56.01	54.3	54.3	fig|11428.3.peg.2850	fig|11428.3.peg.2850	19
208	32.05	32.05	55.26	47.98	47.98	fig|11428.3.peg.3381	fig|11428.3.peg.3381	23
209	32.01	32.01	76.15	76.15	76.15	fig|11428.3.peg.522	fig|11428.3.peg.522	19
210	31.92	31.92	41.2	39.58	37.5	fig|11428.3.peg.4327	fig|11428.3.peg.4327	17
211	31.87	31.88	63.61	56.87	50.4	fig|11428.3.peg.3810	fig|11428.3.peg.3810	18
212	31.86	31.86	57.66	50.85	50.85	fig|11428.3.peg.2515	fig|11428.3.peg.2515	16
213	31.68	31.68	81.55	63.1	61.31	fig|11428.3.peg.4557	fig|11428.3.peg.4557	20
214	31.65	31.65	34.39	30.79	30.79	fig|11428.3.peg.2270	fig|11428.3.peg.2270	22
215	31.58	31.58	51.48	43.05	38.27	fig|11428.3.peg.4667	fig|11428.3.peg.4667	20
216	31.38	33.45	70.25	67.71	66.01	fig|11428.3.peg.4628	fig|11428.3.peg.4628	16
217	31.38	31.38	56.86	54.52	52.17	fig|11428.3.peg.4661	fig|11428.3.peg.4661	16
218	31.11	31.11	65.83	63.31	63.31	fig|11428.3.peg.259	fig|11428.3.peg.259	16
219	31.07	31.07	33.42	26.79	25.71	fig|11428.3.peg.4940	fig|11428.3.peg.4940	20
220	30.98	30.98	74.15	70.24	66.34	fig|11428.3.peg.13	fig|11428.3.peg.13	17
221	30.98	30.98	52.22	52.22	52.22	fig|1428.368.peg.3810	fig|1428.368.peg.3810	23
222	30.95	30.95	65.44	65.44	64.11	fig|11428.3.peg.4103	fig|11428.3.peg.4103	20
223	30.84	31.47	57.03	55.14	52.7	fig|11428.3.peg.1313	fig|11428.3.peg.1313	18
224	30.66	30.66	58.79	53.3	49.45	fig|11428.3.peg.27	fig|11428.3.peg.27	19
225	30.61	33.58	37.08	35.33	33.04	fig|11428.3.peg.2211	fig|11428.3.peg.2211	19
226	30.54	30.54	55.01	48.33	48.33	fig|11428.3.peg.2612	fig|11428.3.peg.2612	22
227	30.32	30.32	67.27	59.46	59.46	fig|11428.3.peg.5598	fig|11428.3.peg.5598	21
228	30.3	33.38	51.75	44.54	42.79	fig|1428.368.peg.6262	fig|1428.368.peg.6262	19
229	30.26	79.85	58.55	41.81	40.07	fig|11428.3.peg.2444	fig|11428.3.peg.2444	53
230	30.23	30.23	56.52	41.43	34.02	fig|11428.3.peg.4826	fig|11428.3.peg.4826	16
231	30.14	30.14	26.63	15.85	15.85	fig|11428.3.peg.4829	fig|11428.3.peg.4829	15
232	29.95	29.95	60	50.51	50.17	fig|11428.3.peg.3195	fig|11428.3.peg.3195	18
233	29.94	29.94	52.34	47.98	47.98	fig|11428.3.peg.4173	fig|11428.3.peg.4173	15
234	29.92	29.92	56.37	49.46	42.55	fig|11428.3.peg.5948	fig|11428.3.peg.5948	17
235	29.85	29.85	72.27	72.27	69.14	fig|11428.3.peg.6121	fig|11428.3.peg.6121	16
236	29.84	29.88	71.71	66.95	63.31	fig|11428.3.peg.3950	fig|11428.3.peg.3950	18
237	29.79	29.79	65.37	59.22	56.96	fig|11428.3.peg.5623	fig|11428.3.peg.5623	22
238	29.74	29.74	72.03	65.38	65.38	fig|1428.368.peg.3334	fig|1428.368.peg.3334	20
238	0	29.74	72.03	65.38	65.38	fig|11428.3.peg.4560	fig|11428.3.peg.4560	20
239	29.52	29.52	85.58	84.65	84.65	fig|11428.3.peg.5454	fig|11428.3.peg.5454	19
240	29.45	29.45	54.44	48.6	48.6	fig|11428.3.peg.1343	fig|11428.3.peg.1343	19
241	29.42	29.42	35.96	28.07	26.32	fig|11428.3.peg.3463	fig|11428.3.peg.3463	16
242	29.4	29.4	62.15	59.08	59.08	fig|11428.3.peg.3380	fig|11428.3.peg.3380	15
243	29.39	29.39	34.73	21.92	21.2	fig|11428.3.peg.3829	fig|11428.3.peg.3829	18
244	29.18	29.18	37.77	33.66	30.27	fig|11428.3.peg.4174	fig|11428.3.peg.4174	16
245	29.09	29.09	35.98	29.91	24.86	fig|11428.3.peg.3188	fig|11428.3.peg.3188	16
246	28.82	28.82	56.63	54.34	50.77	fig|11428.3.peg.4995	fig|11428.3.peg.4995	16
247	28.71	28.71	51.72	51.72	48.54	fig|11428.3.peg.1771	fig|11428.3.peg.1771	15
247	0	26.62	45.09	45.09	41.91	fig|1428.368.peg.5144	fig|1428.368.peg.5144	14
248	28.65	28.65	27.64	21.61	20.35	fig|11428.3.peg.481	fig|11428.3.peg.481	14
249	28.29	29.31	42.53	38.91	38.91	fig|1428.368.peg.2458	fig|1428.368.peg.2458	32
250	28.25	28.25	32.55	30.02	28.85	fig|11428.3.peg.6025	fig|11428.3.peg.6025	18
251	28.23	28.25	27.32	25.69	24.23	fig|11428.3.peg.2071	fig|11428.3.peg.2071	15
252	28.23	28.23	55	53.06	49.72	fig|11428.3.peg.351	fig|11428.3.peg.351	15
253	28.13	28.13	100	100	100	fig|1428.368.peg.4403	fig|1428.368.peg.4403	23
254	28.1	28.1	50	46.49	42.43	fig|11428.3.peg.967	fig|11428.3.peg.967	14
255	28.09	28.09	46.82	45.23	45.23	fig|11428.3.peg.614	fig|11428.3.peg.614	16
256	28.06	28.11	51.96	42.16	42.16	fig|11428.3.peg.5000	fig|11428.3.peg.5000	17
257	28.06	28.06	43.8	40.77	40.77	fig|11428.3.peg.4245	fig|11428.3.peg.4245	16
258	28.02	28.02	63.95	55.79	55.36	fig|1428.368.peg.3916	fig|1428.368.peg.3916	19
258	0	28.02	63.95	55.79	55.36	fig|11428.3.peg.3194	fig|11428.3.peg.3194	19
259	28	28.01	52.86	52.86	52.86	fig|1428.368.peg.5286	fig|1428.368.peg.5286	15
260	27.88	27.88	96.58	96.58	96.58	fig|1428.368.peg.5590	fig|1428.368.peg.5590	25
260	0	27.88	96.58	96.58	96.58	fig|11428.3.peg.5015	fig|11428.3.peg.5015	25
261	27.82	27.82	50	45.29	45.29	fig|1428.368.peg.1131	fig|1428.368.peg.1131	17
262	27.81	34.49	55.81	48.29	48.29	fig|1428.368.peg.899	fig|1428.368.peg.899	21
263	27.76	27.76	45.85	36.53	36.53	fig|11428.3.peg.3185	fig|11428.3.peg.3185	14
263	0	25.7	40.67	32.9	32.9	fig|1428.368.peg.3925	fig|1428.368.peg.3925	13
264	27.71	27.71	58.15	49.26	49.26	fig|11428.3.peg.5077	fig|11428.3.peg.5077	16
265	27.63	27.63	46.76	46.47	41.76	fig|11428.3.peg.479	fig|11428.3.peg.479	15
266	27.5	30.69	77.4	74.58	74.58	fig|1428.368.peg.4574	fig|1428.368.peg.4574	28
267	27.4	65.72	70	68.22	68.22	fig|11428.3.peg.2733	fig|11428.3.peg.2733	59
268	27.38	27.38	89.36	88.51	88.51	fig|1428.368.peg.4694	fig|1428.368.peg.4694	18
268	0	25.35	80	79.15	79.15	fig|11428.3.peg.912	fig|11428.3.peg.912	17
269	27.36	29.14	43.97	42.09	41.02	fig|11428.3.peg.2208	fig|11428.3.peg.2208	19
270	27.24	27.24	45.25	40.78	36.59	fig|11428.3.peg.1200	fig|11428.3.peg.1200	15
270	0	26.41	44.69	40.78	34.08	fig|1428.368.peg.3002	fig|1428.368.peg.3002	14
271	27.1	27.1	52.92	52.92	52.92	fig|1428.368.peg.4545	fig|1428.368.peg.4545	17
271	0	25.01	42.41	42.41	42.41	fig|11428.3.peg.5222	fig|11428.3.peg.5222	16
272	27.08	27.08	36.68	34.51	34.51	fig|11428.3.peg.1403	fig|11428.3.peg.1403	15
272	0	25.04	36.22	31.35	31.35	fig|1428.368.peg.5237	fig|1428.368.peg.5237	14
273	27.04	27.04	62.53	53.64	47.44	fig|1428.368.peg.6061	fig|1428.368.peg.6061	20
274	27.04	27.04	42.38	37.21	35.66	fig|11428.3.peg.2139	fig|11428.3.peg.2139	14
275	26.99	26.99	75.17	69.13	65.1	fig|1428.368.peg.1514	fig|1428.368.peg.1514	21
276	26.92	26.92	47.43	45.43	41.71	fig|1428.368.peg.839	fig|1428.368.peg.839	15
277	26.83	26.83	45.57	37.5	33.59	fig|11428.3.peg.2867	fig|11428.3.peg.2867	14
278	26.72	26.72	66.83	66.83	66.83	fig|11428.3.peg.3220	fig|11428.3.peg.3220	22
279	26.6	26.6	64.04	64.04	64.04	fig|1428.368.peg.2250	fig|1428.368.peg.2250	18
280	26.56	26.56	32.71	20	18.76	fig|11428.3.peg.5931	fig|11428.3.peg.5931	14
280	0	26.56	29.46	20	18.76	fig|1428.368.peg.6169	fig|1428.368.peg.6169	14
281	26.5	26.5	91.22	91.22	86.49	fig|1428.368.peg.4745	fig|1428.368.peg.4745	21
282	26.39	26.39	62.71	48.9	44.75	fig|11428.3.peg.2250	fig|11428.3.peg.2250	15
283	26.23	26.23	48.75	35	35	fig|11428.3.peg.3391	fig|11428.3.peg.3391	14
284	26.21	36.5	67.89	67.89	67.89	fig|1428.368.peg.3482	fig|1428.368.peg.3482	27
285	26.07	26.07	35	28.65	24.04	fig|11428.3.peg.3243	fig|11428.3.peg.3243	15
285	0	24.48	31.86	25.91	21.31	fig|1428.368.peg.3869	fig|1428.368.peg.3869	14
286	26	26	47.57	46.36	46.36	fig|11428.3.peg.5903	fig|11428.3.peg.5903	17
287	25.99	25.99	45.71	32.69	32.69	fig|11428.3.peg.3229	fig|11428.3.peg.3229	12
288	25.97	25.97	54.57	54.57	52.13	fig|11428.3.peg.2848	fig|11428.3.peg.2848	17
289	25.82	25.82	45.59	37.28	32.49	fig|1428.368.peg.1807	fig|1428.368.peg.1807	15
290	25.72	100.68	73.62	67.98	66.01	fig|11428.3.peg.3413	fig|11428.3.peg.3413	64
291	25.66	25.66	54.81	54.81	54.81	fig|11428.3.peg.5914	fig|11428.3.peg.5914	13
292	25.6	25.6	33.16	28.24	26.42	fig|11428.3.peg.1530	fig|11428.3.peg.1530	15
293	25.57	25.57	37.56	33.41	31.46	fig|1428.368.peg.2255	fig|1428.368.peg.2255	13
293	0	25.57	35.61	33.41	31.46	fig|11428.3.peg.5158	fig|11428.3.peg.5158	13
294	25.52	25.52	45.39	40.09	40.09	fig|1428.368.peg.2828	fig|1428.368.peg.2828	14
295	25.35	25.35	57.14	57.14	57.14	fig|1428.368.peg.3350	fig|1428.368.peg.3350	16
296	25.29	47.14	70.29	68.97	68.97	fig|1428.368.peg.6120	fig|1428.368.peg.6120	42
297	25.26	25.26	34.32	30.74	24.84	fig|1428.368.peg.4609	fig|1428.368.peg.4609	12
297	0	25.26	34.32	30.74	24.84	fig|11428.3.peg.4913	fig|11428.3.peg.4913	12
298	25.24	26.43	62.42	51.68	51.68	fig|11428.3.peg.5174	fig|11428.3.peg.5174	20
299	25.23	25.23	67.5	56	56	fig|11428.3.peg.5861	fig|11428.3.peg.5861	18
299	0	25.23	57	56	56	fig|1428.368.peg.6086	fig|1428.368.peg.6086	18
300	25.16	25.16	55.84	53.57	47.73	fig|11428.3.peg.1274	fig|11428.3.peg.1274	13
301	25.14	25.14	28.41	24.24	24.24	fig|11428.3.peg.5850	fig|11428.3.peg.5850	13
302	25.1	25.1	64.13	60.14	53.26	fig|1428.368.peg.6319	fig|1428.368.peg.6319	18
302	0	25.1	64.13	60.14	53.26	fig|11428.3.peg.1969	fig|11428.3.peg.1969	18
303	25.09	25.09	32.75	32.75	32.75	fig|11428.3.peg.1467	fig|11428.3.peg.1467	15
304	24.97	24.97	43.54	42.03	39.49	fig|11428.3.peg.994	fig|11428.3.peg.994	13
305	24.94	24.94	46.55	42.12	36.21	fig|11428.3.peg.5081	fig|11428.3.peg.5081	15
306	24.94	24.94	33.97	26.09	22.96	fig|1428.368.peg.1528	fig|1428.368.peg.1528	16
307	24.92	24.92	98.18	95.45	92.73	fig|1428.368.peg.6446	fig|1428.368.peg.6446	20
308	24.86	24.86	50.96	33.76	31.53	fig|1428.368.peg.6295	fig|1428.368.peg.6295	16
308	0	24.86	50.96	33.76	31.53	fig|11428.3.peg.1993	fig|11428.3.peg.1993	16
309	24.84	24.84	51.51	42.47	37.53	fig|11428.3.peg.1111	fig|11428.3.peg.1111	13
310	24.78	24.78	66.07	66.07	66.07	fig|11428.3.peg.2389	fig|11428.3.peg.2389	20
311	24.69	24.69	73.16	67.53	67.53	fig|11428.3.peg.1769	fig|11428.3.peg.1769	19
311	0	22.64	70.13	64.5	64.5	fig|1428.368.peg.5142	fig|1428.368.peg.5142	18
312	24.56	24.56	35.58	24.74	23.11	fig|1428.368.peg.919	fig|1428.368.peg.919	14
313	24.45	24.45	49.55	49.55	49.55	fig|11428.3.peg.5173	fig|11428.3.peg.5173	12
314	24.44	24.44	47.76	44.49	42.86	fig|1428.368.peg.924	fig|1428.368.peg.924	13
315	24.42	24.42	63.97	53.31	52.94	fig|11428.3.peg.1527	fig|11428.3.peg.1527	14
316	24.39	24.39	53.62	52.17	48.7	fig|1428.368.peg.3580	fig|1428.368.peg.3580	15
317	24.37	24.37	52.73	50.8	46.62	fig|1428.368.peg.4927	fig|1428.368.peg.4927	13
318	24.35	24.56	35.32	27.42	24.03	fig|11428.3.peg.535	fig|11428.3.peg.535	12
319	24.12	24.12	41.4	39.65	37.66	fig|11428.3.peg.1285	fig|11428.3.peg.1285	13
320	24.11	24.11	43.64	41.45	35.27	fig|1428.368.peg.3397	fig|1428.368.peg.3397	12
321	24.03	24.03	34.76	23.53	19.25	fig|11428.3.peg.5219	fig|11428.3.peg.5219	12
322	24.02	24.02	47.78	44.37	40.27	fig|11428.3.peg.3861	fig|11428.3.peg.3861	13
323	24	68.69	70.2	63.36	63.36	fig|1428.368.peg.2315	fig|1428.368.peg.2315	63
324	24	24	42.24	41.93	41.93	fig|1428.368.peg.75	fig|1428.368.peg.75	14
325	24	24	100	92.25	92.25	fig|1428.368.peg.3641	fig|1428.368.peg.3641	16
326	23.94	25.44	39.34	28.69	25.41	fig|11428.3.peg.1427	fig|11428.3.peg.1427	12
327	23.88	23.88	45.48	40.65	35.81	fig|11428.3.peg.2051	fig|11428.3.peg.2051	12
328	23.85	25.94	28.7	28.7	25.57	fig|1428.368.peg.1479	fig|1428.368.peg.1479	18
329	23.83	23.83	44.96	37.61	33.4	fig|11428.3.peg.5125	fig|11428.3.peg.5125	13
330	23.82	23.82	69.59	52.63	52.63	fig|11428.3.peg.4211	fig|11428.3.peg.4211	14
331	23.81	23.81	55.6	41.42	41.42	fig|1428.368.peg.5323	fig|1428.368.peg.5323	13
332	23.52	23.52	50.47	43.93	41.74	fig|11428.3.peg.5558	fig|11428.3.peg.5558	13
333	23.29	43.7	54.51	53.19	53.19	fig|1428.368.peg.2427	fig|1428.368.peg.2427	27
334	23.07	23.07	56.02	42.86	42.86	fig|11428.3.peg.981	fig|11428.3.peg.981	17
335	22.99	22.99	21.83	21.83	20.59	fig|11428.3.peg.6026	fig|11428.3.peg.6026	13
336	22.89	22.89	44.6	32.41	28.28	fig|11428.3.peg.4945	fig|11428.3.peg.4945	14
337	22.82	22.82	32.49	32.49	32.49	fig|1428.368.peg.3122	fig|1428.368.peg.3122	14
337	0	22.82	32.49	32.49	32.49	fig|11428.3.peg.5752	fig|11428.3.peg.5752	14
338	22.73	22.73	44.44	41.67	39.29	fig|1428.368.peg.58	fig|1428.368.peg.58	13
339	22.5	117.18	77.3	74.11	74.11	fig|1428.368.peg.1691	fig|1428.368.peg.1691	77
340	22.42	22.42	43.42	43.14	43.14	fig|11428.3.peg.2902	fig|11428.3.peg.2902	14
341	22.34	33.05	32.68	23.44	20.21	fig|11428.3.peg.2056	fig|11428.3.peg.2056	16
342	22.32	22.32	32.8	31.2	31.2	fig|11428.3.peg.5205	fig|11428.3.peg.5205	13
343	22.29	22.29	34.15	31.18	31.18	fig|11428.3.peg.3775	fig|11428.3.peg.3775	15
344	22.27	22.27	47.08	39.18	38.83	fig|11428.3.peg.1137	fig|11428.3.peg.1137	12
345	22.21	22.21	44.67	44.67	44.67	fig|11428.3.peg.3219	fig|11428.3.peg.3219	12
346	22.13	22.13	86.67	86.67	83.33	fig|1428.368.peg.51	fig|1428.368.peg.51	11
347	22.02	22.02	41.38	41.38	41.07	fig|1428.368.peg.6144	fig|1428.368.peg.6144	14
347	0	22.02	41.38	41.38	41.07	fig|11428.3.peg.5907	fig|11428.3.peg.5907	14
348	22.01	22.01	48.62	43.43	43.43	fig|1428.368.peg.2904	fig|1428.368.peg.2904	11
348	0	22.01	48.62	43.43	43.43	fig|11428.3.peg.4666	fig|11428.3.peg.4666	11
349	22	66.69	63.3	61.65	60.41	fig|11428.3.peg.2830	fig|11428.3.peg.2830	43
350	22	22	53.13	46.88	46.88	fig|11428.3.peg.6123	fig|11428.3.peg.6123	13
351	21.96	21.96	41.27	40.06	37.05	fig|1428.368.peg.6066	fig|1428.368.peg.6066	14
352	21.95	21.95	52.79	46.04	41.35	fig|11428.3.peg.2549	fig|11428.3.peg.2549	12
353	21.91	21.91	54.36	52.82	52.82	fig|1428.368.peg.421	fig|1428.368.peg.421	16
354	21.78	21.78	48.65	47.1	47.1	fig|1428.368.peg.3020	fig|1428.368.peg.3020	21
355	21.68	21.68	39.13	29.3	26.28	fig|11428.3.peg.2100	fig|11428.3.peg.2100	13
356	21.66	21.66	38.97	36.96	34.96	fig|1428.368.peg.1899	fig|1428.368.peg.1899	11
357	21.64	21.64	45.35	35.8	33.41	fig|11428.3.peg.5264	fig|11428.3.peg.5264	12
357	0	19.6	42.24	32.7	30.31	fig|1428.368.peg.4507	fig|1428.368.peg.4507	11
358	21.6	21.6	36.28	28.91	28.91	fig|11428.3.peg.718	fig|11428.3.peg.718	13
358	0	19.53	33.04	25.66	25.66	fig|1428.368.peg.4487	fig|1428.368.peg.4487	12
359	21.57	27.5	29.66	20.7	19.67	fig|1428.368.peg.1748	fig|1428.368.peg.1748	15
360	21.57	21.57	62.96	54.63	52.31	fig|11428.3.peg.1987	fig|11428.3.peg.1987	11
361	21.54	21.54	70.18	68.42	55.26	fig|1428.368.peg.3929	fig|1428.368.peg.3929	10
361	0	21.02	63.16	61.4	55.26	fig|11428.3.peg.3181	fig|11428.3.peg.3181	10
362	21.48	21.48	40.48	30.5	30.5	fig|11428.3.peg.1208	fig|11428.3.peg.1208	13
362	0.02	20.07	36.97	26.8	26.8	fig|1428.368.peg.2994	fig|1428.368.peg.2994	13
363	21.48	21.48	43.09	43.09	41.12	fig|11428.3.peg.917	fig|11428.3.peg.917	14
364	21.42	21.42	53.06	45.77	45.77	fig|1428.368.peg.713	fig|1428.368.peg.713	12
365	21.36	77.98	62.99	61.84	60.86	fig|1428.368.peg.4938	fig|1428.368.peg.4938	51
366	21.32	21.32	47.77	31.45	31.16	fig|11428.3.peg.457	fig|11428.3.peg.457	13
367	21.29	21.29	24.81	15.76	15.76	fig|1428.368.peg.6184	fig|1428.368.peg.6184	11
368	21.28	21.28	42.04	40.76	38.22	fig|11428.3.peg.2684	fig|11428.3.peg.2684	11
369	21.27	21.27	39.67	36.96	36.96	fig|1428.368.peg.5203	fig|1428.368.peg.5203	13
370	21.25	23.3	42.05	40.97	37.2	fig|11428.3.peg.5308	fig|11428.3.peg.5308	11
371	21.23	21.23	90.83	90.83	90.83	fig|1428.368.peg.6269	fig|1428.368.peg.6269	14
372	21.17	21.17	69.41	64.12	61.18	fig|1428.368.peg.4752	fig|1428.368.peg.4752	11
372	0	21.17	80.82	74.66	71.23	fig|11428.3.peg.971	fig|11428.3.peg.971	11
373	21.05	21.05	47.12	41.36	39.53	fig|11428.3.peg.5204	fig|11428.3.peg.5204	11
374	20.96	20.96	49.41	45.1	42.35	fig|11428.3.peg.1288	fig|11428.3.peg.1288	12
375	20.88	23.76	34.59	27.99	27.99	fig|11428.3.peg.3858	fig|11428.3.peg.3858	16
376	20.86	20.86	30.07	30.07	27.63	fig|1428.368.peg.4601	fig|1428.368.peg.4601	13
377	20.82	20.82	52.53	42.42	42.42	fig|11428.3.peg.3042	fig|11428.3.peg.3042	12
377	0	18.75	50.84	40.74	40.74	fig|1428.368.peg.185	fig|1428.368.peg.185	11
378	20.8	20.8	38.35	32.42	32.42	fig|11428.3.peg.4228	fig|11428.3.peg.4228	20
379	20.47	20.47	36.27	27.97	25.76	fig|1428.368.peg.251	fig|1428.368.peg.251	11
380	20.44	20.44	34.04	26.39	26.39	fig|1428.368.peg.3370	fig|1428.368.peg.3370	10
381	20.42	20.46	40	34.16	29.44	fig|11428.3.peg.6021	fig|11428.3.peg.6021	13
382	20.35	20.35	35.16	33.43	33.43	fig|11428.3.peg.2042	fig|11428.3.peg.2042	13
383	20.34	20.34	61.35	46.86	46.86	fig|11428.3.peg.5631	fig|11428.3.peg.5631	16
383	0.01	20.04	60.87	41.55	41.55	fig|1428.368.peg.2451	fig|1428.368.peg.2451	13
384	20.31	20.31	57.36	41.12	41.12	fig|1428.368.peg.242	fig|1428.368.peg.242	12
385	20.27	20.27	57.24	50.18	46.64	fig|11428.3.peg.1107	fig|11428.3.peg.1107	12
386	20.27	20.27	39.14	32.7	31.03	fig|11428.3.peg.1655	fig|11428.3.peg.1655	12
387	20.18	20.18	51.58	34.96	32.38	fig|11428.3.peg.1679	fig|11428.3.peg.1679	10
388	20.16	20.16	52.89	52.89	52.89	fig|1428.368.peg.6297	fig|1428.368.peg.6297	11
389	20.14	20.14	44.52	32.53	31.51	fig|11428.3.peg.3553	fig|11428.3.peg.3553	10
390	20.11	20.11	31.32	27.89	22.89	fig|11428.3.peg.3470	fig|11428.3.peg.3470	10
390	0	18.06	31.05	27.63	22.63	fig|1428.368.peg.2796	fig|1428.368.peg.2796	9
391	20.02	20.02	64.33	64.33	64.33	fig|1428.368.peg.5950	fig|1428.368.peg.5950	12
391	0	20.02	64.33	64.33	64.33	fig|11428.3.peg.4046	fig|11428.3.peg.4046	12
392	20	20	86.62	80.25	80.25	fig|1428.368.peg.413	fig|1428.368.peg.413	14
393	20	20	27.99	19.88	19.88	fig|1428.368.peg.1891	fig|1428.368.peg.1891	10
394	19.96	19.96	52.04	40.89	40.89	fig|11428.3.peg.4028	fig|11428.3.peg.4028	11
395	19.92	22.52	80.27	80.27	75.51	fig|1428.368.peg.4573	fig|1428.368.peg.4573	14
396	19.89	19.89	52.8	47.52	41.61	fig|11428.3.peg.4424	fig|11428.3.peg.4424	11
397	19.88	19.89	61.9	61.9	58.2	fig|1428.368.peg.4741	fig|1428.368.peg.4741	13
398	19.53	19.53	37.05	23.44	23.44	fig|11428.3.peg.4697	fig|11428.3.peg.4697	12
398	0	18.16	37.14	23.49	23.49	fig|1428.368.peg.5289	fig|1428.368.peg.5289	12
399	19.53	19.53	80.67	78.15	78.15	fig|11428.3.peg.1956	fig|11428.3.peg.1956	11
400	19.44	19.44	32.9	27.1	23.01	fig|11428.3.peg.1294	fig|11428.3.peg.1294	11
401	19.4	19.42	56.52	50.17	50.17	fig|11428.3.peg.2889	fig|11428.3.peg.2889	12
402	19.34	19.34	32.11	28.19	23.77	fig|11428.3.peg.2	fig|11428.3.peg.2	11
403	19.33	19.33	32.8	22.04	22.04	fig|11428.3.peg.3165	fig|11428.3.peg.3165	12
404	19.19	19.19	54.85	51.9	51.9	fig|1428.368.peg.6267	fig|1428.368.peg.6267	13
405	19.12	19.12	42.79	26.28	26.28	fig|11428.3.peg.5080	fig|11428.3.peg.5080	10
406	19.11	19.11	59.46	43.63	43.63	fig|11428.3.peg.4673	fig|11428.3.peg.4673	12
407	19.1	19.1	32.09	25.12	24.88	fig|11428.3.peg.1168	fig|11428.3.peg.1168	11
408	19.08	19.08	62.71	55.08	55.08	fig|11428.3.peg.6028	fig|11428.3.peg.6028	15
409	19.07	19.07	40.63	34.01	27.38	fig|1428.368.peg.4582	fig|1428.368.peg.4582	10
410	19.05	19.05	34.23	29.76	27.08	fig|11428.3.peg.848	fig|11428.3.peg.848	12
411	19	19	58.53	48.45	48.45	fig|11428.3.peg.5221	fig|11428.3.peg.5221	11
412	18.99	18.99	45.03	37.75	37.75	fig|11428.3.peg.2210	fig|11428.3.peg.2210	13
413	18.92	18.92	45	45	45	fig|11428.3.peg.4558	fig|11428.3.peg.4558	11
414	18.88	18.88	18.66	18.66	18.66	fig|11428.3.peg.608	fig|11428.3.peg.608	10
415	18.82	44.3	83.78	83.78	83.78	fig|1428.368.peg.3456	fig|1428.368.peg.3456	28
416	18.76	18.76	69.49	69.49	69.49	fig|1428.368.peg.5224	fig|1428.368.peg.5224	14
416	0	18.76	69.49	69.49	69.49	fig|11428.3.peg.1391	fig|11428.3.peg.1391	14
417	18.74	18.74	30.48	30.48	30.48	fig|1428.368.peg.918	fig|1428.368.peg.918	11
418	18.7	18.7	15.02	11.1	9.888	fig|11428.3.peg.3136	fig|11428.3.peg.3136	9
419	18.68	18.68	37.95	30.77	28.72	fig|11428.3.peg.5057	fig|11428.3.peg.5057	10
419	0	16.64	33.59	26.92	24.87	fig|1428.368.peg.5632	fig|1428.368.peg.5632	9
420	18.65	18.65	26.06	18.57	16.78	fig|1428.368.peg.2690	fig|1428.368.peg.2690	9
420	0	18.65	26.06	18.57	16.78	fig|11428.3.peg.3365	fig|11428.3.peg.3365	9
421	18.65	18.65	40.52	29.63	24.18	fig|11428.3.peg.5753	fig|11428.3.peg.5753	12
422	18.65	18.65	29.98	19.08	19.08	fig|11428.3.peg.105	fig|11428.3.peg.105	10
423	18.6	18.6	36.3	36.3	36.3	fig|11428.3.peg.3457	fig|11428.3.peg.3457	12
424	18.47	18.47	26.46	19.58	19.58	fig|11428.3.peg.543	fig|11428.3.peg.543	10
425	18.46	18.46	35.89	25.82	23.63	fig|11428.3.peg.2160	fig|11428.3.peg.2160	9
426	18.41	18.41	31.95	25.12	25.12	fig|1428.368.peg.3831	fig|1428.368.peg.3831	10
427	18.38	18.38	40.96	30.42	28.31	fig|11428.3.peg.5674	fig|11428.3.peg.5674	11
428	18.29	18.29	60.26	52.56	48.72	fig|1428.368.peg.6326	fig|1428.368.peg.6326	11
429	18.22	18.22	77.93	77.93	73.79	fig|1428.368.peg.6289	fig|1428.368.peg.6289	10
430	18.15	18.16	30.54	21.47	18.32	fig|11428.3.peg.5953	fig|11428.3.peg.5953	9
431	18.1	18.1	70.48	70.48	70.48	fig|1428.368.peg.3833	fig|1428.368.peg.3833	24
432	18.07	18.07	36.31	30.65	30.65	fig|11428.3.peg.6126	fig|11428.3.peg.6126	12
433	18.02	24.24	36.26	26.56	21.25	fig|11428.3.peg.4720	fig|11428.3.peg.4720	13
434	18.01	18.01	50.23	43.26	36.28	fig|11428.3.peg.1478	fig|11428.3.peg.1478	9
435	18	36	58.71	49.62	49.62	fig|1428.368.peg.4559	fig|1428.368.peg.4559	22
436	18	18	38.35	30.4	30.4	fig|1428.368.peg.4446	fig|1428.368.peg.4446	9
437	18	18	46.38	44.2	39.86	fig|1428.368.peg.4112	fig|1428.368.peg.4112	9
438	18	18	60.78	59.48	59.48	fig|1428.368.peg.2856	fig|1428.368.peg.2856	12
439	18	18	46.91	41.36	41.36	fig|11428.3.peg.4642	fig|11428.3.peg.4642	14
440	17.96	17.96	39.77	39.77	37.07	fig|11428.3.peg.3193	fig|11428.3.peg.3193	10
440	0	17.94	37.07	37.07	37.07	fig|1428.368.peg.3917	fig|1428.368.peg.3917	10
441	17.93	17.93	58.76	56.7	53.61	fig|1428.368.peg.3509	fig|1428.368.peg.3509	16
442	17.87	17.87	48.1	43.81	35.24	fig|1428.368.peg.6322	fig|1428.368.peg.6322	12
442	0	17.87	48.1	43.81	35.24	fig|11428.3.peg.1966	fig|11428.3.peg.1966	12
443	17.85	17.85	30.46	24.14	24.14	fig|1428.368.peg.3890	fig|1428.368.peg.3890	10
443	0	17.85	30.46	24.14	24.14	fig|11428.3.peg.3221	fig|11428.3.peg.3221	10
444	17.83	24.08	52.85	52.85	45.05	fig|1428.368.peg.3591	fig|1428.368.peg.3591	13
445	17.83	17.83	27.55	23.38	23.38	fig|11428.3.peg.4149	fig|11428.3.peg.4149	9
446	17.82	17.82	36.67	28.46	28.46	fig|11428.3.peg.350	fig|11428.3.peg.350	10
447	17.8	17.8	22.37	21.77	18.87	fig|11428.3.peg.1209	fig|11428.3.peg.1209	11
448	17.73	17.73	45.17	43.45	43.45	fig|11428.3.peg.3776	fig|11428.3.peg.3776	10
449	17.73	17.73	31.34	31.34	28.96	fig|11428.3.peg.4430	fig|11428.3.peg.4430	11
450	17.72	17.72	40.85	40.85	40.85	fig|1428.368.peg.3417	fig|1428.368.peg.3417	10
450	0	17.72	40.85	40.85	40.85	fig|11428.3.peg.4473	fig|11428.3.peg.4473	10
451	17.71	17.71	44.93	39.13	39.13	fig|11428.3.peg.612	fig|11428.3.peg.612	12
452	17.65	17.65	50	32.44	22.32	fig|11428.3.peg.1292	fig|11428.3.peg.1292	9
453	17.56	18.34	24.88	19.44	14.66	fig|11428.3.peg.1080	fig|11428.3.peg.1080	9
454	17.55	17.55	23.33	22.22	20.19	fig|1428.368.peg.4654	fig|1428.368.peg.4654	9
454	0	17.55	23.33	22.22	20.19	fig|11428.3.peg.873	fig|11428.3.peg.873	9
455	17.55	17.55	25.73	23.54	23.54	fig|11428.3.peg.2050	fig|11428.3.peg.2050	11
455	0	15.51	21.36	17.48	17.48	fig|1428.368.peg.4917	fig|1428.368.peg.4917	10
456	17.47	17.47	54.74	54.74	54.74	fig|11428.3.peg.6102	fig|11428.3.peg.6102	13
457	17.44	17.44	28.89	21.01	19.89	fig|1428.368.peg.2088	fig|1428.368.peg.2088	9
458	17.44	17.44	23.6	20.56	17.51	fig|11428.3.peg.615	fig|11428.3.peg.615	9
459	17.35	17.35	31.6	27.16	24.44	fig|11428.3.peg.1373	fig|11428.3.peg.1373	9
460	17.35	17.35	23.46	19.81	17.12	fig|11428.3.peg.524	fig|11428.3.peg.524	9
461	17.27	17.27	35.37	23.14	21.62	fig|11428.3.peg.452	fig|11428.3.peg.452	9
462	17.24	17.24	25.11	14.8	11.32	fig|11428.3.peg.5312	fig|11428.3.peg.5312	10
463	17.16	17.16	32.01	27.81	24.28	fig|1428.368.peg.73	fig|1428.368.peg.73	9
464	17.12	17.12	64.15	64.15	64.15	fig|11428.3.peg.5198	fig|11428.3.peg.5198	11
465	17.09	17.09	26.91	17.04	15.55	fig|11428.3.peg.4928	fig|11428.3.peg.4928	9
466	16.99	16.99	40.24	32.54	32.54	fig|11428.3.peg.4393	fig|11428.3.peg.4393	11
466	0	16.99	31.79	31.79	31.79	fig|1428.368.peg.4245	fig|1428.368.peg.4245	11
467	16.94	16.94	20.63	13.51	13.51	fig|11428.3.peg.4519	fig|11428.3.peg.4519	9
467	0	16.93	20.63	13.51	13.51	fig|1428.368.peg.3374	fig|1428.368.peg.3374	9
468	16.94	16.94	49.4	49.4	42.17	fig|1428.368.peg.6305	fig|1428.368.peg.6305	8
468	0	16.94	49.4	49.4	42.17	fig|11428.3.peg.1983	fig|11428.3.peg.1983	8
469	16.89	16.89	30.62	25.84	25.84	fig|11428.3.peg.3202	fig|11428.3.peg.3202	9
470	16.89	16.89	23.18	15.91	15.91	fig|11428.3.peg.1740	fig|11428.3.peg.1740	9
470	0	14.81	22	14.72	14.72	fig|1428.368.peg.5113	fig|1428.368.peg.5113	8
471	16.85	16.87	45.79	45.79	44.69	fig|1428.368.peg.2829	fig|1428.368.peg.2829	16
471	0	14.83	45.79	41.03	39.93	fig|11428.3.peg.3501	fig|11428.3.peg.3501	14
472	16.8	16.8	35.44	31.53	31.53	fig|1428.368.peg.2905	fig|1428.368.peg.2905	9
473	16.68	16.68	60.09	47.42	42.72	fig|11428.3.peg.5182	fig|11428.3.peg.5182	9
474	16.66	16.66	43.84	38.04	30.07	fig|11428.3.peg.5627	fig|11428.3.peg.5627	9
475	16.57	16.57	26.33	16.25	13.73	fig|1428.368.peg.1873	fig|1428.368.peg.1873	8
476	16.55	16.55	39.74	37.99	32.75	fig|11428.3.peg.2014	fig|11428.3.peg.2014	10
477	16.48	45.24	95.67	95.67	95.67	fig|11428.3.peg.4367	fig|11428.3.peg.4367	52
478	16.42	16.42	62.3	57.38	50	fig|1428.368.peg.6312	fig|1428.368.peg.6312	8
478	0	16.42	62.3	57.38	50	fig|11428.3.peg.1976	fig|11428.3.peg.1976	8
479	16.28	16.28	24.06	16.08	12.2	fig|11428.3.peg.5919	fig|11428.3.peg.5919	9
480	16.24	16.24	17.1	9.039	8.225	fig|1428.368.peg.2058	fig|1428.368.peg.2058	8
481	16.2	16.2	54.26	54.26	54.26	fig|11428.3.peg.1992	fig|11428.3.peg.1992	10
482	16.11	16.11	27.47	25	21.91	fig|1428.368.peg.6219	fig|1428.368.peg.6219	8
483	16.08	16.08	27.76	19.41	19.41	fig|11428.3.peg.1153	fig|11428.3.peg.1153	9
484	16.07	16.31	99.05	91.43	91.43	fig|1428.368.peg.2509	fig|1428.368.peg.2509	24
485	16.06	16.06	33.1	33.1	32.74	fig|1428.368.peg.4628	fig|1428.368.peg.4628	8
485	0	16.06	33.1	33.1	32.74	fig|11428.3.peg.4933	fig|11428.3.peg.4933	8
486	16.03	16.04	36.62	28.03	28.03	fig|1428.368.peg.1343	fig|1428.368.peg.1343	8
487	16.03	16.03	34.18	28.73	27.27	fig|1428.368.peg.4533	fig|1428.368.peg.4533	8
488	16.02	16.02	57.92	49.77	43.89	fig|11428.3.peg.4059	fig|11428.3.peg.4059	13
489	16.01	16.01	34.77	23.6	23.6	fig|11428.3.peg.638	fig|11428.3.peg.638	9
490	16.01	16.01	18.02	13.47	13.47	fig|11428.3.peg.3927	fig|11428.3.peg.3927	8
491	16	42.68	43.56	41.63	41.63	fig|1428.368.peg.3387	fig|1428.368.peg.3387	27
492	16	16	30.55	30.55	30.55	fig|1428.368.peg.1604	fig|1428.368.peg.1604	8
493	15.92	15.92	45.71	27.35	19.18	fig|11428.3.peg.2011	fig|11428.3.peg.2011	9
494	15.86	15.86	46.15	42.53	42.53	fig|1428.368.peg.3186	fig|1428.368.peg.3186	9
495	15.82	15.82	68.54	66.29	66.29	fig|1428.368.peg.3570	fig|1428.368.peg.3570	13
495	0	15.82	68.54	66.29	66.29	fig|11428.3.peg.2868	fig|11428.3.peg.2868	13
496	15.8	15.8	44.59	25.48	25.48	fig|1428.368.peg.3047	fig|1428.368.peg.3047	8
497	15.74	16.69	31.44	26	24.35	fig|11428.3.peg.1861	fig|11428.3.peg.1861	12
497	0	14.61	28.61	23.17	21.51	fig|1428.368.peg.1632	fig|1428.368.peg.1632	11
498	15.73	16.06	39.82	38.3	38.3	fig|11428.3.peg.2711	fig|11428.3.peg.2711	10
498	0	15.66	36.47	36.47	36.47	fig|1428.368.peg.4497	fig|1428.368.peg.4497	9
499	15.68	15.68	40.3	38.21	38.21	fig|11428.3.peg.4034	fig|11428.3.peg.4034	9
500	15.66	17.2	91.18	87.25	83.33	fig|1428.368.peg.6323	fig|1428.368.peg.6323	9
501	15.66	15.66	49.39	43.32	43.32	fig|11428.3.peg.1706	fig|11428.3.peg.1706	9
501	0.01	13.58	49.39	37.65	37.65	fig|1428.368.peg.459	fig|1428.368.peg.459	8
502	15.62	15.62	53.09	47.53	47.53	fig|11428.3.peg.3399	fig|11428.3.peg.3399	9
502	0	14.25	47.53	47.53	47.53	fig|1428.368.peg.2725	fig|1428.368.peg.2725	8
503	15.56	15.56	38.82	20	20	fig|1428.368.peg.4508	fig|1428.368.peg.4508	9
504	15.5	15.5	30.59	23.52	23.52	fig|11428.3.peg.2316	fig|11428.3.peg.2316	9
505	15.47	15.47	32.65	32.65	32.65	fig|1428.368.peg.871	fig|1428.368.peg.871	10
506	15.29	15.29	54.15	50.2	48.62	fig|11428.3.peg.5229	fig|11428.3.peg.5229	10
506	0	14.93	54.15	49.01	48.62	fig|1428.368.peg.4538	fig|1428.368.peg.4538	10
507	15.15	87.2	76.23	75.2	75.2	fig|1428.368.peg.4893	fig|1428.368.peg.4893	79
508	15.15	15.15	61.36	61.36	56.06	fig|1428.368.peg.6308	fig|1428.368.peg.6308	9
508	0	15.15	61.36	61.36	56.06	fig|11428.3.peg.1980	fig|11428.3.peg.1980	9
509	15.13	15.13	39.78	35.29	29.13	fig|11428.3.peg.5991	fig|11428.3.peg.5991	8
510	15.13	15.13	42.71	38.54	38.54	fig|1428.368.peg.3864	fig|1428.368.peg.3864	10
511	15.12	15.12	40.23	31.03	31.03	fig|11428.3.peg.5079	fig|11428.3.peg.5079	8
511	0	13.08	35.25	26.05	26.05	fig|1428.368.peg.5659	fig|1428.368.peg.5659	7
512	15.11	15.11	46.61	46.61	41.53	fig|1428.368.peg.6172	fig|1428.368.peg.6172	9
512	0	15.11	46.61	46.61	41.53	fig|11428.3.peg.5934	fig|11428.3.peg.5934	9
513	15.08	23.27	42.54	35.82	35.82	fig|1428.368.peg.5658	fig|1428.368.peg.5658	13
513	0	21.76	43.66	36.94	36.94	fig|11428.3.peg.5078	fig|11428.3.peg.5078	12
514	15.06	15.08	28.26	18.84	12.56	fig|11428.3.peg.2876	fig|11428.3.peg.2876	9
515	15.05	15.05	30.73	25	25	fig|1428.368.peg.3996	fig|1428.368.peg.3996	9
515	0	15.05	30.73	25	25	fig|11428.3.peg.3116	fig|11428.3.peg.3116	9
516	14.99	14.99	40.15	29.73	29.34	fig|11428.3.peg.2173	fig|11428.3.peg.2173	8
517	14.97	43.08	45.86	36.69	36.69	fig|1428.368.peg.5599	fig|1428.368.peg.5599	35
518	14.85	14.85	34.63	30.1	29.45	fig|11428.3.peg.3853	fig|11428.3.peg.3853	9
518	0	12.73	30.1	25.57	24.92	fig|1428.368.peg.5505	fig|1428.368.peg.5505	8
519	14.81	14.81	21.74	14.93	14.93	fig|11428.3.peg.3516	fig|11428.3.peg.3516	9
519	0	12.77	20.42	12.48	12.48	fig|1428.368.peg.2843	fig|1428.368.peg.2843	8
520	14.74	14.74	33.64	25.86	23.36	fig|11428.3.peg.4531	fig|11428.3.peg.4531	8
521	14.72	14.72	78.64	70.87	70.87	fig|1428.368.peg.6311	fig|1428.368.peg.6311	8
521	0	14.72	78.64	70.87	70.87	fig|11428.3.peg.1977	fig|11428.3.peg.1977	8
522	14.72	14.72	31.48	28.85	28.52	fig|11428.3.peg.5179	fig|11428.3.peg.5179	8
523	14.72	14.72	49.58	48.75	48.75	fig|11428.3.peg.3196	fig|11428.3.peg.3196	8
524	14.69	14.69	67.04	59.78	59.78	fig|11428.3.peg.1978	fig|11428.3.peg.1978	10
524	0	11.85	55.31	48.04	48.04	fig|1428.368.peg.6310	fig|1428.368.peg.6310	9
525	14.47	14.47	24.3	11.04	10.36	fig|11428.3.peg.2989	fig|11428.3.peg.2989	7
525	0	12.44	28.17	9.681	9.003	fig|1428.368.peg.3630	fig|1428.368.peg.3630	6
526	14.46	14.46	42.71	36.18	36.18	fig|11428.3.peg.5682	fig|11428.3.peg.5682	9
527	14.42	14.42	41.67	41.67	36.81	fig|1428.368.peg.4134	fig|1428.368.peg.4134	8
527	0	14.42	41.67	41.67	36.81	fig|11428.3.peg.3726	fig|11428.3.peg.3726	8
528	14.37	14.37	61.7	51.06	46.1	fig|1428.368.peg.6335	fig|1428.368.peg.6335	7
528	0	14.37	61.7	51.06	46.1	fig|11428.3.peg.1953	fig|11428.3.peg.1953	7
529	14.34	14.34	19.8	15.69	15.29	fig|11428.3.peg.3230	fig|11428.3.peg.3230	7
529	0	12.31	16.67	12.55	12.16	fig|1428.368.peg.3881	fig|1428.368.peg.3881	6
530	14.27	14.27	53.61	41.57	37.35	fig|11428.3.peg.1955	fig|11428.3.peg.1955	7
531	14.25	14.25	41.64	25.5	23.23	fig|11428.3.peg.5597	fig|11428.3.peg.5597	9
532	14.2	14.2	36.25	21.59	21.59	fig|11428.3.peg.2953	fig|11428.3.peg.2953	8
533	14.12	14.12	56.11	50.56	50	fig|1428.368.peg.5479	fig|1428.368.peg.5479	7
533	0	14.12	56.11	50.56	50	fig|11428.3.peg.3821	fig|11428.3.peg.3821	7
534	14.11	14.11	19.22	16.12	16.12	fig|11428.3.peg.1038	fig|11428.3.peg.1038	9
535	14.09	14.09	43.61	43.61	43.61	fig|11428.3.peg.4177	fig|11428.3.peg.4177	8
536	14.08	14.08	26.51	14.09	14.09	fig|11428.3.peg.998	fig|11428.3.peg.998	8
537	14.06	14.06	57.78	51.11	51.11	fig|11428.3.peg.3191	fig|11428.3.peg.3191	16
537	0	14.02	57.78	51.11	51.11	fig|1428.368.peg.3919	fig|1428.368.peg.3919	16
538	14.05	14.05	76.03	72.73	72.73	fig|1428.368.peg.2788	fig|1428.368.peg.2788	10
539	14.05	14.05	59.49	51.9	41.14	fig|1428.368.peg.1132	fig|1428.368.peg.1132	15
540	14.04	14.04	40.16	28.74	28.74	fig|11428.3.peg.3401	fig|11428.3.peg.3401	9
540	0	12.03	37.4	25.59	25.59	fig|1428.368.peg.2728	fig|1428.368.peg.2728	8
541	14.03	14.03	28.15	18.27	18.27	fig|1428.368.peg.3811	fig|1428.368.peg.3811	7
542	14	50.8	48.85	47.31	47.31	fig|1428.368.peg.2763	fig|1428.368.peg.2763	34
543	14	14	34.35	23.83	23.83	fig|1428.368.peg.3978	fig|1428.368.peg.3978	7
544	14	14	20.04	17.95	15.24	fig|11428.3.peg.571	fig|11428.3.peg.571	8
544	0	12.03	17.95	14.61	11.9	fig|1428.368.peg.5847	fig|1428.368.peg.5847	7
545	14	14	63.46	63.46	63.46	fig|11428.3.peg.5224	fig|11428.3.peg.5224	8
546	14	14	62.56	60.1	60.1	fig|11428.3.peg.1407	fig|11428.3.peg.1407	10
547	14	14	54.9	54.9	54.9	fig|1428.368.peg.4479	fig|1428.368.peg.4479	9
547	0	14	54.9	54.9	54.9	fig|11428.3.peg.710	fig|11428.3.peg.710	9
548	13.95	13.95	21.94	20.43	19.57	fig|1428.368.peg.5663	fig|1428.368.peg.5663	10
548	0	13.95	21.94	20.43	19.57	fig|11428.3.peg.5083	fig|11428.3.peg.5083	10
549	13.82	13.82	22.93	15.84	14.18	fig|11428.3.peg.5522	fig|11428.3.peg.5522	8
550	13.81	13.81	34.2	27.01	27.01	fig|1428.368.peg.900	fig|1428.368.peg.900	7
551	13.75	13.75	21.56	21.3	18.18	fig|11428.3.peg.1205	fig|11428.3.peg.1205	8
552	13.65	13.65	17.36	12.73	12.73	fig|1428.368.peg.4229	fig|1428.368.peg.4229	8
553	13.61	13.61	53.03	45.45	45.45	fig|11428.3.peg.311	fig|11428.3.peg.311	9
554	13.53	13.54	23.01	23.01	19.35	fig|11428.3.peg.3108	fig|11428.3.peg.3108	8
555	13.53	13.53	32.95	29.55	29.55	fig|11428.3.peg.1469	fig|11428.3.peg.1469	11
556	13.5	13.5	42.25	42.25	42.25	fig|11428.3.peg.4048	fig|11428.3.peg.4048	7
557	13.42	13.42	38.33	23.1	23.1	fig|11428.3.peg.2776	fig|11428.3.peg.2776	7
558	13.21	13.21	32.34	26.63	24.73	fig|1428.368.peg.3905	fig|1428.368.peg.3905	7
559	13.18	13.18	31.56	14.53	14.53	fig|11428.3.peg.4413	fig|11428.3.peg.4413	7
559	0	11.14	32.03	12.5	12.5	fig|1428.368.peg.4265	fig|1428.368.peg.4265	6
560	13.15	13.15	28.19	24.2	22.07	fig|11428.3.peg.4166	fig|11428.3.peg.4166	7
561	13.14	13.14	54.12	54.12	54.12	fig|1428.368.peg.1766	fig|1428.368.peg.1766	10
562	13.12	13.12	47.06	47.06	42.35	fig|11428.3.peg.4234	fig|11428.3.peg.4234	11
563	13.08	13.08	28.09	16.22	16.22	fig|1428.368.peg.2496	fig|1428.368.peg.2496	7
564	12.98	13.03	18.87	11.9	11.9	fig|11428.3.peg.2204	fig|11428.3.peg.2204	7
565	12.98	12.98	13.3	10.89	10.89	fig|11428.3.peg.1656	fig|11428.3.peg.1656	7
566	12.91	12.91	25	18.95	13.51	fig|11428.3.peg.1100	fig|11428.3.peg.1100	7
567	12.9	12.9	43.5	34.08	34.08	fig|1428.368.peg.1351	fig|1428.368.peg.1351	7
567	0	10.79	40.36	27.35	27.35	fig|11428.3.peg.5416	fig|11428.3.peg.5416	6
568	12.9	12.9	34.53	34.53	29.6	fig|11428.3.peg.5245	fig|11428.3.peg.5245	8
569	12.84	12.84	52.78	52.78	52.78	fig|1428.368.peg.2630	fig|1428.368.peg.2630	8
570	12.77	40.69	35.61	33.98	33.98	fig|11428.3.peg.5136	fig|11428.3.peg.5136	24
571	12.74	12.74	27.95	15.72	15.72	fig|1428.368.peg.5740	fig|1428.368.peg.5740	7
571	0	12.74	24.45	15.72	15.72	fig|11428.3.peg.5702	fig|11428.3.peg.5702	7
572	12.72	12.72	54.89	51.09	51.09	fig|11428.3.peg.3384	fig|11428.3.peg.3384	7
573	12.66	12.66	22.27	15.78	15.78	fig|11428.3.peg.1559	fig|11428.3.peg.1559	8
574	12.64	12.64	53.16	46.2	41.14	fig|1428.368.peg.2844	fig|1428.368.peg.2844	7
575	12.64	12.64	33.23	24.52	22.58	fig|11428.3.peg.4422	fig|11428.3.peg.4422	6
576	12.6	12.6	35.33	28.14	28.14	fig|1428.368.peg.5531	fig|1428.368.peg.5531	11
577	12.59	13.22	29.9	20.4	15.64	fig|11428.3.peg.480	fig|11428.3.peg.480	8
578	12.59	12.59	35.08	23.69	11.75	fig|11428.3.peg.5488	fig|11428.3.peg.5488	8
579	12.59	12.59	36.73	26.87	22.45	fig|11428.3.peg.5235	fig|11428.3.peg.5235	6
580	12.58	31.71	51.42	44.55	40.52	fig|1428.368.peg.3551	fig|1428.368.peg.3551	20
581	12.49	12.49	31.13	23.9	18.55	fig|11428.3.peg.447	fig|11428.3.peg.447	6
582	12.42	12.42	36.94	31.11	20.28	fig|11428.3.peg.4215	fig|11428.3.peg.4215	6
583	12.39	13.41	32.72	29.04	29.04	fig|11428.3.peg.4279	fig|11428.3.peg.4279	7
584	12.37	12.51	24.23	18.69	18.69	fig|11428.3.peg.5523	fig|11428.3.peg.5523	8
585	12.3	12.3	49.5	20.93	16.61	fig|11428.3.peg.3722	fig|11428.3.peg.3722	8
586	12.29	12.29	32.92	26.18	24.19	fig|1428.368.peg.559	fig|1428.368.peg.559	7
587	12.28	12.29	30.56	23.44	20.18	fig|1428.368.peg.5545	fig|1428.368.peg.5545	7
588	12.27	12.28	53.04	40.43	36.52	fig|11428.3.peg.1954	fig|11428.3.peg.1954	8
589	12.27	12.28	39.1	38.46	38.46	fig|11428.3.peg.699	fig|11428.3.peg.699	8
590	12.27	12.27	66.67	66.67	61.48	fig|1428.368.peg.3073	fig|1428.368.peg.3073	9
591	12.27	12.27	45.25	40.78	40.78	fig|11428.3.peg.1981	fig|11428.3.peg.1981	7
592	12.21	14.23	37.07	28.74	26.15	fig|11428.3.peg.1891	fig|11428.3.peg.1891	11
593	12.09	47.75	58.41	47.92	42.86	fig|1428.368.peg.4387	fig|1428.368.peg.4387	27
594	12.09	12.09	18.07	12.28	12.28	fig|11428.3.peg.4471	fig|11428.3.peg.4471	6
595	12.08	16.09	65.32	55.86	50.9	fig|11428.3.peg.3043	fig|11428.3.peg.3043	8
596	12.07	12.07	42.27	39.18	39.18	fig|1428.368.peg.4319	fig|1428.368.peg.4319	6
597	12.06	12.06	46.88	35.94	35.94	fig|11428.3.peg.4218	fig|11428.3.peg.4218	6
598	12.05	12.05	28.57	21.21	19.48	fig|11428.3.peg.1064	fig|11428.3.peg.1064	6
599	12.04	12.04	24.47	22.61	22.61	fig|1428.368.peg.3371	fig|1428.368.peg.3371	7
599	0	10.03	19.95	16.49	16.49	fig|11428.3.peg.4522	fig|11428.3.peg.4522	6
600	12.03	12.03	31.44	21.13	21.13	fig|1428.368.peg.5351	fig|1428.368.peg.5351	6
600	0	12.03	31.44	21.13	21.13	fig|11428.3.peg.1578	fig|11428.3.peg.1578	6
601	12.01	12.01	30.65	18.26	16.96	fig|1428.368.peg.1029	fig|1428.368.peg.1029	6
602	12	121.55	70.62	69.34	69.34	fig|11428.3.peg.2039	fig|11428.3.peg.2039	103
603	12	45.69	68.71	61.98	61.98	fig|1428.368.peg.1630	fig|1428.368.peg.1630	30
604	12	25.27	42.53	38.91	38.91	fig|11428.3.peg.5622	fig|11428.3.peg.5622	19
605	12	12	58.62	51.72	51.72	fig|11428.3.peg.3929	fig|11428.3.peg.3929	7
606	12	12	54.22	50	50	fig|1428.368.peg.6102	fig|1428.368.peg.6102	8
606	0	12	54.22	50	50	fig|11428.3.peg.5844	fig|11428.3.peg.5844	8
607	11.97	11.97	68.02	61.63	46.51	fig|1428.368.peg.4971	fig|1428.368.peg.4971	7
608	11.91	11.91	43.34	22.91	22.91	fig|11428.3.peg.2009	fig|11428.3.peg.2009	6
609	11.91	11.91	45.65	34.78	30.98	fig|11428.3.peg.833	fig|11428.3.peg.833	6
610	11.88	11.88	28.45	20.72	18.78	fig|11428.3.peg.5310	fig|11428.3.peg.5310	6
611	11.83	11.83	19.75	13.46	13.46	fig|1428.368.peg.1321	fig|1428.368.peg.1321	7
612	11.82	23.31	57.14	57.14	57.14	fig|11428.3.peg.4544	fig|11428.3.peg.4544	13
613	11.8	11.8	41.85	37.04	29.63	fig|11428.3.peg.1387	fig|11428.3.peg.1387	6
613	0.01	9.74	41.48	34.07	26.67	fig|1428.368.peg.5220	fig|1428.368.peg.5220	5
614	11.75	11.75	35	24.29	16.19	fig|1428.368.peg.1322	fig|1428.368.peg.1322	6
615	11.74	11.74	48.65	41.62	41.62	fig|1428.368.peg.3913	fig|1428.368.peg.3913	7
615	0	11.74	48.65	41.62	41.62	fig|11428.3.peg.3197	fig|11428.3.peg.3197	7
616	11.68	34.91	41.41	37.44	37.44	fig|1428.368.peg.4606	fig|1428.368.peg.4606	20
617	11.66	11.66	19.49	18.08	18.08	fig|11428.3.peg.1937	fig|11428.3.peg.1937	8
618	11.65	11.65	61.9	49.21	46.03	fig|11428.3.peg.2169	fig|11428.3.peg.2169	6
619	11.61	11.61	30.7	20.67	20.67	fig|1428.368.peg.4921	fig|1428.368.peg.4921	6
619	0	11.61	27.96	20.67	20.67	fig|11428.3.peg.2047	fig|11428.3.peg.2047	6
620	11.59	11.59	30.1	28.48	25.24	fig|11428.3.peg.2709	fig|11428.3.peg.2709	7
621	11.56	11.56	33.6	22.76	20.05	fig|11428.3.peg.5168	fig|11428.3.peg.5168	7
622	11.55	15.81	30.48	12.76	12.12	fig|1428.368.peg.707	fig|1428.368.peg.707	8
623	11.41	11.41	29.52	25	22.59	fig|1428.368.peg.2673	fig|1428.368.peg.2673	7
623	0	11.41	29.52	25	22.59	fig|11428.3.peg.3348	fig|11428.3.peg.3348	7
624	11.37	11.37	24.01	11.41	11.01	fig|11428.3.peg.1732	fig|11428.3.peg.1732	6
625	11.37	11.37	43.67	37.14	31.43	fig|11428.3.peg.5249	fig|11428.3.peg.5249	7
625	0	9.3	34.69	28.16	22.45	fig|1428.368.peg.4516	fig|1428.368.peg.4516	5
626	11.29	11.29	25	15.8	14.2	fig|1428.368.peg.5070	fig|1428.368.peg.5070	6
627	11.24	11.24	43.81	31.96	30.41	fig|1428.368.peg.5062	fig|1428.368.peg.5062	6
628	11.21	11.21	37	28	25	fig|11428.3.peg.3186	fig|11428.3.peg.3186	6
629	11.21	11.21	40.71	40.71	40.71	fig|1428.368.peg.6317	fig|1428.368.peg.6317	6
629	0	11.21	40.71	40.71	40.71	fig|11428.3.peg.1971	fig|11428.3.peg.1971	6
630	11.14	11.14	20.75	8.505	7.757	fig|11428.3.peg.544	fig|11428.3.peg.544	9
631	11.14	11.14	28.36	25.09	25.09	fig|11428.3.peg.1813	fig|11428.3.peg.1813	7
632	11.11	13.19	47.47	35.44	31.01	fig|11428.3.peg.3028	fig|11428.3.peg.3028	8
633	11.05	11.05	24.76	13.52	13.52	fig|11428.3.peg.5210	fig|11428.3.peg.5210	6
634	11.04	11.04	41.05	20.37	20.37	fig|1428.368.peg.6143	fig|1428.368.peg.6143	6
634	0	11.04	37.04	20.37	20.37	fig|11428.3.peg.5906	fig|11428.3.peg.5906	6
635	11.01	11.01	26.63	21.36	21.36	fig|11428.3.peg.2945	fig|11428.3.peg.2945	6
636	11	11	41.62	41.04	40.46	fig|11428.3.peg.2586	fig|11428.3.peg.2586	7
636	0	8.86	35.26	34.68	34.1	fig|1428.368.peg.2341	fig|1428.368.peg.2341	6
637	10.94	10.94	56.41	56.41	56.41	fig|1428.368.peg.5858	fig|1428.368.peg.5858	7
638	10.9	10.9	28.07	21.75	19.65	fig|11428.3.peg.4529	fig|11428.3.peg.4529	7
639	10.85	10.85	72.34	67.38	67.38	fig|1428.368.peg.3692	fig|1428.368.peg.3692	8
640	10.84	47.09	58.97	47.01	45.3	fig|1428.368.peg.6037	fig|1428.368.peg.6037	26
641	10.81	10.81	79.2	49.6	43.2	fig|1428.368.peg.2339	fig|1428.368.peg.2339	5
642	10.8	43.91	85.71	85.71	83.61	fig|11428.3.peg.1828	fig|11428.3.peg.1828	28
643	10.77	10.77	57.47	43.68	43.68	fig|1428.368.peg.6313	fig|1428.368.peg.6313	7
643	0	10.77	57.47	43.68	43.68	fig|11428.3.peg.1975	fig|11428.3.peg.1975	7
644	10.7	10.7	85.19	85.19	85.19	fig|11428.3.peg.71	fig|11428.3.peg.71	9
645	10.68	10.68	23.53	23.53	23.53	fig|11428.3.peg.1860	fig|11428.3.peg.1860	7
646	10.66	25.43	37.84	35.69	35.69	fig|1428.368.peg.5409	fig|1428.368.peg.5409	16
647	10.66	10.66	69.42	69.42	52.89	fig|11428.3.peg.3347	fig|11428.3.peg.3347	5
648	10.63	10.63	35.66	26.57	20.63	fig|11428.3.peg.6122	fig|11428.3.peg.6122	6
649	10.62	36.08	59.39	59.39	57.36	fig|1428.368.peg.423	fig|1428.368.peg.423	22
650	10.57	10.57	25.59	13.55	11.83	fig|11428.3.peg.1946	fig|11428.3.peg.1946	5
650	0	10.57	21.29	13.55	11.83	fig|1428.368.peg.6343	fig|1428.368.peg.6343	5
651	10.51	10.51	28.99	19.54	19.54	fig|11428.3.peg.3816	fig|11428.3.peg.3816	8
652	10.45	10.45	41.67	35.19	30.56	fig|1428.368.peg.5335	fig|1428.368.peg.5335	12
653	10.41	10.41	35.75	33.68	33.68	fig|11428.3.peg.3865	fig|11428.3.peg.3865	9
653	0	8.24	29.53	27.46	27.46	fig|1428.368.peg.5518	fig|1428.368.peg.5518	8
654	10.4	40.44	59.48	49.88	49.88	fig|1428.368.peg.1363	fig|1428.368.peg.1363	22
655	10.39	10.39	25.68	11.28	9.728	fig|11428.3.peg.4172	fig|11428.3.peg.4172	5
656	10.35	10.35	20.63	15.87	15.87	fig|1428.368.peg.4652	fig|1428.368.peg.4652	6
657	10.32	10.32	25.96	20	16.6	fig|1428.368.peg.4238	fig|1428.368.peg.4238	5
657	0	10.32	25.96	20	16.6	fig|11428.3.peg.4386	fig|11428.3.peg.4386	5
658	10.31	10.31	30.57	14.86	12.86	fig|11428.3.peg.562	fig|11428.3.peg.562	5
659	10.3	10.3	25.61	20.71	16.08	fig|11428.3.peg.4289	fig|11428.3.peg.4289	5
660	10.3	10.3	29.28	20.44	17.13	fig|11428.3.peg.2010	fig|11428.3.peg.2010	5
661	10.27	10.27	31.89	11.89	7.297	fig|11428.3.peg.3611	fig|11428.3.peg.3611	5
661	0	10.26	28.65	11.89	7.297	fig|1428.368.peg.3209	fig|1428.368.peg.3209	5
662	10.26	10.27	30.48	20.4	11.08	fig|11428.3.peg.3527	fig|11428.3.peg.3527	5
663	10.26	10.26	20.78	12.74	12.74	fig|11428.3.peg.1707	fig|11428.3.peg.1707	6
664	10.21	10.21	38.31	35.48	35.48	fig|1428.368.peg.6300	fig|1428.368.peg.6300	6
664	0	10.21	38.31	35.48	35.48	fig|11428.3.peg.1988	fig|11428.3.peg.1988	6
665	10.19	10.19	18.18	16.08	16.08	fig|11428.3.peg.1204	fig|11428.3.peg.1204	7
665	0	9.24	20.05	14.22	14.22	fig|1428.368.peg.2998	fig|1428.368.peg.2998	6
666	10.17	10.17	74.47	67.02	51.06	fig|11428.3.peg.2648	fig|11428.3.peg.2648	6
667	10.17	10.17	23.18	20.42	17.65	fig|1428.368.peg.6142	fig|1428.368.peg.6142	5
667	0	10.17	23.18	20.42	17.65	fig|11428.3.peg.5905	fig|11428.3.peg.5905	5
668	10.15	10.15	34.35	25.51	25.51	fig|11428.3.peg.2407	fig|11428.3.peg.2407	6
669	10.15	10.15	24.09	19.55	19.09	fig|1428.368.peg.3552	fig|1428.368.peg.3552	5
669	0	10.15	24.09	19.55	19.09	fig|11428.3.peg.2887	fig|11428.3.peg.2887	5
670	10.15	10.15	42.98	31.4	28.51	fig|11428.3.peg.5481	fig|11428.3.peg.5481	5
671	10.15	10.15	49.71	49.71	49.12	fig|11428.3.peg.181	fig|11428.3.peg.181	5
672	10.14	10.14	25.7	22.89	19.68	fig|11428.3.peg.2884	fig|11428.3.peg.2884	5
673	10.13	10.13	19.57	17.79	15.81	fig|1428.368.peg.4296	fig|1428.368.peg.4296	6
673	0	8.12	17.39	15.61	13.64	fig|11428.3.peg.4194	fig|11428.3.peg.4194	5
674	10.13	10.13	23.78	19.21	17.38	fig|11428.3.peg.6079	fig|11428.3.peg.6079	5
675	10.12	10.12	37.04	22.69	18.29	fig|11428.3.peg.2761	fig|11428.3.peg.2761	5
676	10.08	10.08	28.28	18.66	18.66	fig|1428.368.peg.3870	fig|1428.368.peg.3870	7
677	10.06	10.06	25.66	22.57	22.57	fig|11428.3.peg.2012	fig|11428.3.peg.2012	6
678	10.02	10.02	31.43	28.1	28.1	fig|11428.3.peg.2517	fig|11428.3.peg.2517	5
679	10.01	10.01	26.82	23.18	23.18	fig|1428.368.peg.4320	fig|1428.368.peg.4320	5
679	0	10.01	29.8	25.76	25.76	fig|11428.3.peg.4220	fig|11428.3.peg.4220	5
680	10	136.1	84.94	77.65	76.55	fig|1428.368.peg.1544	fig|1428.368.peg.1544	82
681	10	46.49	47.93	40.32	37.92	fig|1428.368.peg.1387	fig|1428.368.peg.1387	27
682	10	45.87	74.92	74.92	74.92	fig|1428.368.peg.3140	fig|1428.368.peg.3140	27
683	10	10	34.03	21.53	21.53	fig|1428.368.peg.2804	fig|1428.368.peg.2804	5
683	0	10	34.03	21.53	21.53	fig|11428.3.peg.3477	fig|11428.3.peg.3477	5
684	10	10	23.58	19.03	19.03	fig|1428.368.peg.273	fig|1428.368.peg.273	6
685	10	10	25.26	13.55	13.55	fig|1428.368.peg.1371	fig|1428.368.peg.1371	5
686	10	10	44.09	31.5	31.5	fig|11428.3.peg.1476	fig|11428.3.peg.1476	5
687	10	10	31.22	22.93	22.93	fig|11428.3.peg.3460	fig|11428.3.peg.3460	5
687	0	8	31.22	19.02	19.02	fig|1428.368.peg.2786	fig|1428.368.peg.2786	4
688	10	10	22.44	19.23	19.23	fig|11428.3.peg.1855	fig|11428.3.peg.1855	5
689	10	10	30.88	30.88	30.88	fig|11428.3.peg.659	fig|11428.3.peg.659	7
690	10	10	33.48	33.48	33.48	fig|11428.3.peg.5892	fig|11428.3.peg.5892	7
690	0	8	26.43	26.43	26.43	fig|1428.368.peg.6131	fig|1428.368.peg.6131	5
691	9.96	9.96	25.18	11.25	11.25	fig|1428.368.peg.5082	fig|1428.368.peg.5082	5
692	9.93	9.93	24.68	21.85	21.85	fig|11428.3.peg.822	fig|11428.3.peg.822	6
693	9.87	9.87	20.99	18.32	15.65	fig|11428.3.peg.6024	fig|11428.3.peg.6024	5
694	9.85	9.85	25.2	22.05	22.05	fig|11428.3.peg.3056	fig|11428.3.peg.3056	5
695	9.81	9.81	21.24	20.08	20.08	fig|1428.368.peg.3194	fig|1428.368.peg.3194	5
696	9.79	9.79	29.33	21	18.33	fig|1428.368.peg.4396	fig|1428.368.peg.4396	6
697	9.77	9.77	26.17	26.17	22.66	fig|1428.368.peg.4962	fig|1428.368.peg.4962	6
698	9.75	9.75	15.32	10.86	10.86	fig|11428.3.peg.5214	fig|11428.3.peg.5214	5
699	9.74	9.74	20	16.32	13.56	fig|11428.3.peg.3115	fig|11428.3.peg.3115	5
699	0	7.61	14.02	11.49	8.736	fig|1428.368.peg.3997	fig|1428.368.peg.3997	4
700	9.66	9.66	30.79	20.82	16.72	fig|11428.3.peg.6124	fig|11428.3.peg.6124	5
701	9.64	9.64	25.18	22.26	16.79	fig|1428.368.peg.4185	fig|1428.368.peg.4185	5
701	0	9.64	22.63	22.26	16.79	fig|11428.3.peg.4334	fig|11428.3.peg.4334	5
702	9.64	9.64	23.3	16.76	16.76	fig|1428.368.peg.6136	fig|1428.368.peg.6136	5
702	0	9.64	23.03	16.57	16.57	fig|11428.3.peg.5899	fig|11428.3.peg.5899	5
703	9.59	9.59	19.27	10.98	10.98	fig|11428.3.peg.4357	fig|11428.3.peg.4357	9
704	9.59	9.59	28.69	18.03	18.03	fig|11428.3.peg.2742	fig|11428.3.peg.2742	5
705	9.57	9.57	21.21	12.45	12.45	fig|11428.3.peg.4175	fig|11428.3.peg.4175	5
706	9.57	9.57	19.69	19.69	19.69	fig|11428.3.peg.1286	fig|11428.3.peg.1286	5
707	9.47	9.47	29.23	21.04	21.04	fig|1428.368.peg.4247	fig|1428.368.peg.4247	7
707	0	9.47	23.77	21.04	21.04	fig|11428.3.peg.4395	fig|11428.3.peg.4395	7
708	9.4	9.4	26.48	17.46	17.46	fig|11428.3.peg.2003	fig|11428.3.peg.2003	5
709	9.38	9.38	35.99	25.8	23.57	fig|11428.3.peg.3169	fig|11428.3.peg.3169	7
710	9.38	9.38	26.71	20.52	20.52	fig|11428.3.peg.2332	fig|11428.3.peg.2332	7
711	9.37	9.37	69.44	69.44	69.44	fig|11428.3.peg.2193	fig|11428.3.peg.2193	5
712	9.34	9.4	24.71	15.71	12.64	fig|11428.3.peg.5848	fig|11428.3.peg.5848	5
713	9.34	9.34	44.16	35.53	31.47	fig|1428.368.peg.6445	fig|1428.368.peg.6445	5
714	9.32	9.32	26.83	19.11	14.84	fig|1428.368.peg.49	fig|1428.368.peg.49	5
715	9.27	26.23	50.5	42.08	39.11	fig|1428.368.peg.4383	fig|1428.368.peg.4383	16
716	9.27	9.27	17.73	14.96	14.96	fig|1428.368.peg.4747	fig|1428.368.peg.4747	5
717	9.26	9.26	28.9	19.58	16.08	fig|11428.3.peg.2712	fig|11428.3.peg.2712	6
717	0	6.98	26.81	17.48	13.99	fig|1428.368.peg.4496	fig|1428.368.peg.4496	5
718	9.24	9.24	54.32	54.32	54.32	fig|11428.3.peg.1279	fig|11428.3.peg.1279	5
719	9.22	9.22	41.01	25.9	25.9	fig|11428.3.peg.1050	fig|11428.3.peg.1050	6
720	9.21	9.21	45.56	45.56	33.73	fig|11428.3.peg.303	fig|11428.3.peg.303	5
721	9.08	9.08	24.48	17.91	17.91	fig|11428.3.peg.1554	fig|11428.3.peg.1554	5
722	9.08	9.08	32.93	27.24	27.24	fig|11428.3.peg.3170	fig|11428.3.peg.3170	6
723	9.07	9.1	49.47	27.66	23.4	fig|1428.368.peg.5201	fig|1428.368.peg.5201	5
724	9.05	10.56	33.92	27.19	22.81	fig|1428.368.peg.6162	fig|1428.368.peg.6162	8
725	9.04	9.04	26.87	23.28	23.28	fig|1428.368.peg.3311	fig|1428.368.peg.3311	5
726	8.99	8.99	20.64	12.5	12.5	fig|11428.3.peg.5946	fig|11428.3.peg.5946	5
727	8.9	53.49	57.45	56.21	55.14	fig|1428.368.peg.480	fig|1428.368.peg.480	33
728	8.89	8.89	40.63	40.63	40.63	fig|1428.368.peg.5256	fig|1428.368.peg.5256	5
728	0	8.89	40.63	40.63	40.63	fig|11428.3.peg.1423	fig|11428.3.peg.1423	5
729	8.81	8.81	22.69	14.96	14.96	fig|1428.368.peg.6112	fig|1428.368.peg.6112	5
729	0	8.81	22.69	14.96	14.96	fig|11428.3.peg.5834	fig|11428.3.peg.5834	5
730	8.8	8.8	27.3	17.82	13.51	fig|1428.368.peg.4818	fig|1428.368.peg.4818	5
730	0	8.8	21.55	17.82	13.51	fig|11428.3.peg.3287	fig|11428.3.peg.3287	5
731	8.79	8.81	22.61	12.86	12.86	fig|1428.368.peg.1979	fig|1428.368.peg.1979	7
732	8.79	8.79	14.72	14.72	14.72	fig|1428.368.peg.3197	fig|1428.368.peg.3197	5
732	0	8	11.16	11.16	11.16	fig|11428.3.peg.622	fig|11428.3.peg.622	4
733	8.77	8.77	4.458	3.735	3.454	fig|1428.368.peg.1731	fig|1428.368.peg.1731	5
734	8.75	8.75	19.59	14.43	14.43	fig|11428.3.peg.472	fig|11428.3.peg.472	5
735	8.74	25.37	62.76	54.95	54.95	fig|1428.368.peg.2484	fig|1428.368.peg.2484	16
736	8.74	8.74	14.13	8.798	7.683	fig|11428.3.peg.1607	fig|11428.3.peg.1607	5
736	0	6.66	14	7.187	6.072	fig|1428.368.peg.1680	fig|1428.368.peg.1680	4
737	8.69	25.12	45.56	42.96	40	fig|1428.368.peg.5657	fig|1428.368.peg.5657	13
738	8.68	52.9	55.45	54.85	54.85	fig|1428.368.peg.4793	fig|1428.368.peg.4793	30
739	8.59	8.63	17.94	17.94	13.51	fig|11428.3.peg.3054	fig|11428.3.peg.3054	5
740	8.55	8.55	24.65	21.83	21.83	fig|11428.3.peg.2008	fig|11428.3.peg.2008	6
741	8.54	8.54	26.69	13.88	7.473	fig|11428.3.peg.2017	fig|11428.3.peg.2017	4
742	8.54	8.54	21.03	18.28	15.52	fig|1428.368.peg.3396	fig|1428.368.peg.3396	4
742	0	8.54	21.03	18.28	15.52	fig|11428.3.peg.4495	fig|11428.3.peg.4495	4
743	8.53	8.53	37.6	37.6	37.6	fig|11428.3.peg.406	fig|11428.3.peg.406	7
744	8.52	8.52	18.97	16.8	11.38	fig|1428.368.peg.4590	fig|1428.368.peg.4590	4
745	8.51	8.51	42.53	32.18	32.18	fig|11428.3.peg.4527	fig|11428.3.peg.4527	5
746	8.51	8.51	32.14	25	19.64	fig|11428.3.peg.1486	fig|11428.3.peg.1486	4
746	0	8.49	31.61	27.1	21.29	fig|1428.368.peg.4375	fig|1428.368.peg.4375	4
747	8.5	8.5	21.21	19.39	13.64	fig|1428.368.peg.4106	fig|1428.368.peg.4106	5
748	8.48	8.48	49.41	49.41	40	fig|11428.3.peg.211	fig|11428.3.peg.211	4
749	8.46	8.46	55	45	40.71	fig|1428.368.peg.3416	fig|1428.368.peg.3416	6
749	0	8.46	55	45	40.71	fig|11428.3.peg.4474	fig|11428.3.peg.4474	6
750	8.46	8.46	47.06	44.12	30.39	fig|11428.3.peg.5744	fig|11428.3.peg.5744	4
751	8.46	8.46	22.32	22.32	16.38	fig|11428.3.peg.850	fig|11428.3.peg.850	5
752	8.43	8.43	10.54	6.522	5.761	fig|11428.3.peg.4204	fig|11428.3.peg.4204	6
753	8.43	8.43	15.46	11.01	9.602	fig|11428.3.peg.3616	fig|11428.3.peg.3616	5
754	8.41	8.41	52.24	32.84	29.85	fig|11428.3.peg.3658	fig|11428.3.peg.3658	5
755	8.4	8.4	25.51	25.51	21.46	fig|11428.3.peg.4965	fig|11428.3.peg.4965	4
755	0	6.35	21.46	21.46	17.41	fig|1428.368.peg.5540	fig|1428.368.peg.5540	3
756	8.39	8.39	25.89	18.26	15.8	fig|1428.368.peg.2907	fig|1428.368.peg.2907	5
756	0	8.33	25.34	15.8	15.8	fig|11428.3.peg.4663	fig|11428.3.peg.4663	5
757	8.39	8.39	18.93	13.35	10.68	fig|11428.3.peg.3240	fig|11428.3.peg.3240	5
758	8.32	8.32	19.17	14.6	10.89	fig|11428.3.peg.476	fig|11428.3.peg.476	4
759	8.31	8.31	17.43	6.785	6.785	fig|11428.3.peg.3850	fig|11428.3.peg.3850	6
759	0	8.31	15.69	6.799	6.799	fig|1428.368.peg.5502	fig|1428.368.peg.5502	6
760	8.31	8.31	63.33	63.33	55.56	fig|1428.368.peg.3933	fig|1428.368.peg.3933	4
760	0	8.31	63.33	63.33	55.56	fig|11428.3.peg.3177	fig|11428.3.peg.3177	4
761	8.25	8.25	67.02	67.02	67.02	fig|1428.368.peg.4325	fig|1428.368.peg.4325	14
762	8.24	8.25	56.88	48.12	35.62	fig|11428.3.peg.1705	fig|11428.3.peg.1705	4
763	8.23	8.25	54.17	54.17	54.17	fig|1428.368.peg.4246	fig|1428.368.peg.4246	6
763	0	8.25	54.17	54.17	54.17	fig|11428.3.peg.4394	fig|11428.3.peg.4394	6
764	8.22	8.22	47.19	32.58	32.58	fig|1428.368.peg.5164	fig|1428.368.peg.5164	5
765	8.2	52.71	64.42	62.09	58.37	fig|11428.3.peg.1617	fig|11428.3.peg.1617	29
766	8.18	8.18	42.6	32.54	27.81	fig|11428.3.peg.3573	fig|11428.3.peg.3573	4
767	8.16	22.3	49.8	49.8	49.8	fig|11428.3.peg.3643	fig|11428.3.peg.3643	13
768	8.14	8.23	23.48	20.73	17.07	fig|11428.3.peg.598	fig|11428.3.peg.598	7
769	8.14	8.14	12.58	8.71	7.742	fig|11428.3.peg.3352	fig|11428.3.peg.3352	4
770	8.11	8.11	31.18	23.19	16.73	fig|11428.3.peg.1290	fig|11428.3.peg.1290	6
771	8.09	14.5	25.33	18.15	13.42	fig|11428.3.peg.258	fig|11428.3.peg.258	7
772	8.08	8.08	39.56	26.67	22.22	fig|11428.3.peg.4319	fig|11428.3.peg.4319	5
772	0	6.07	34.67	21.78	17.33	fig|1428.368.peg.4167	fig|1428.368.peg.4167	3
773	8.08	8.08	55.84	49.35	44.81	fig|11428.3.peg.2844	fig|11428.3.peg.2844	4
774	8.07	8.07	32.97	19.71	17.2	fig|11428.3.peg.4999	fig|11428.3.peg.4999	4
775	8.05	9.51	60.11	43.26	39.89	fig|1428.368.peg.3478	fig|1428.368.peg.3478	15
776	8.05	8.05	14.88	8.71	7.166	fig|11428.3.peg.3147	fig|11428.3.peg.3147	4
777	8.04	8.04	22.27	10.48	10.48	fig|11428.3.peg.4844	fig|11428.3.peg.4844	4
778	8.04	8.04	16.38	9.048	7.644	fig|11428.3.peg.4208	fig|11428.3.peg.4208	4
779	8.04	8.04	34.48	28.02	28.02	fig|11428.3.peg.2886	fig|11428.3.peg.2886	4
780	8.03	14.04	31.85	31.85	31.85	fig|1428.368.peg.2783	fig|1428.368.peg.2783	9
781	8.03	8.03	22.7	12.13	12.13	fig|11428.3.peg.4936	fig|11428.3.peg.4936	6
782	8.03	8.03	58.27	48.92	48.92	fig|11428.3.peg.289	fig|11428.3.peg.289	6
783	8.02	13.34	20.28	12.82	12.82	fig|1428.368.peg.3421	fig|1428.368.peg.3421	8
784	8.02	8.02	25.55	17.45	15.89	fig|11428.3.peg.2121	fig|11428.3.peg.2121	4
785	8.02	8.02	44.44	23.67	23.67	fig|1428.368.peg.6321	fig|1428.368.peg.6321	4
785	0	8.02	44.44	23.67	23.67	fig|11428.3.peg.1967	fig|11428.3.peg.1967	4
786	8.02	8.02	17.94	7.423	7.423	fig|1428.368.peg.4610	fig|1428.368.peg.4610	4
786	0	8.02	17.94	7.423	7.423	fig|11428.3.peg.4914	fig|11428.3.peg.4914	4
787	8.02	8.02	47.22	43.52	43.52	fig|1428.368.peg.2486	fig|1428.368.peg.2486	4
788	8.02	8.02	36.21	22.99	22.99	fig|11428.3.peg.1703	fig|11428.3.peg.1703	4
789	8.01	8.01	14.31	12.54	10.25	fig|1428.368.peg.5073	fig|1428.368.peg.5073	5
790	8	84.07	93.74	93.74	93.74	fig|11428.3.peg.4960	fig|11428.3.peg.4960	56
791	8	34.51	69.86	69.86	69.86	fig|11428.3.peg.3223	fig|11428.3.peg.3223	24
792	8	31.42	60.92	58.77	58.77	fig|1428.368.peg.4544	fig|1428.368.peg.4544	18
793	8	30.42	79.15	77.74	74.91	fig|1428.368.peg.3372	fig|1428.368.peg.3372	20
794	8	25.26	51.17	47.83	45.48	fig|1428.368.peg.2909	fig|1428.368.peg.2909	14
795	8	15.67	40.69	37.93	37.93	fig|1428.368.peg.4076	fig|1428.368.peg.4076	9
796	8	8	31.98	14.98	14.98	fig|11428.3.peg.3503	fig|11428.3.peg.3503	4
797	8	8	53.51	39.46	39.46	fig|11428.3.peg.2464	fig|11428.3.peg.2464	4
797	0.01	6.04	44.32	27.03	27.03	fig|1428.368.peg.1732	fig|1428.368.peg.1732	3
798	8	8	25.2	18.8	18.8	fig|11428.3.peg.2018	fig|11428.3.peg.2018	4
799	8	8	50.41	43.9	43.9	fig|1428.368.peg.3388	fig|1428.368.peg.3388	5
799	0	6	37.9	28.23	28.23	fig|11428.3.peg.4504	fig|11428.3.peg.4504	4
800	8	8	33.64	33.64	33.64	fig|1428.368.peg.1864	fig|1428.368.peg.1864	5
801	8	8	24.43	24.43	24.43	fig|11428.3.peg.4249	fig|11428.3.peg.4249	9
802	8	8	17.9	17.12	17.12	fig|11428.3.peg.3057	fig|11428.3.peg.3057	4
802	0	6	14.77	13.92	13.92	fig|1428.368.peg.198	fig|1428.368.peg.198	3
803	8	8	24.14	24.14	24.14	fig|11428.3.peg.2236	fig|11428.3.peg.2236	5
804	8	8	19.67	13.39	13.39	fig|11428.3.peg.2106	fig|11428.3.peg.2106	5
805	8	8	34.59	31.35	31.35	fig|11428.3.peg.136	fig|11428.3.peg.136	4
805	0	6	33.52	22.35	22.35	fig|1428.368.peg.6062	fig|1428.368.peg.6062	3
806	8	8	56.76	56.76	56.76	fig|1428.368.peg.6298	fig|1428.368.peg.6298	6
806	0	8	56.76	56.76	56.76	fig|11428.3.peg.1990	fig|11428.3.peg.1990	6
807	8	8	34.44	34.44	34.44	fig|1428.368.peg.4740	fig|1428.368.peg.4740	4
807	0	8	34.44	34.44	34.44	fig|11428.3.peg.959	fig|11428.3.peg.959	4
808	8	8	31.23	31.23	31.23	fig|1428.368.peg.4054	fig|1428.368.peg.4054	4
809	7.96	7.96	14.2	9	9	fig|11428.3.peg.4179	fig|11428.3.peg.4179	5
810	7.96	7.96	20	20	20	fig|11428.3.peg.3015	fig|11428.3.peg.3015	6
810	0	5.81	15.33	12.77	12.77	fig|1428.368.peg.946	fig|1428.368.peg.946	5
811	7.94	7.94	31.76	20.59	20.59	fig|1428.368.peg.5105	fig|1428.368.peg.5105	4
811	0	7.94	31.76	20.59	20.59	fig|11428.3.peg.1735	fig|11428.3.peg.1735	4
812	7.93	9.39	18.55	13.62	13.62	fig|1428.368.peg.2876	fig|1428.368.peg.2876	6
813	7.92	7.92	34.15	33.33	33.33	fig|11428.3.peg.1085	fig|11428.3.peg.1085	4
813	0	6	28.46	28.46	28.46	fig|1428.368.peg.1225	fig|1428.368.peg.1225	3
814	7.92	7.92	46.84	46.84	46.84	fig|1428.368.peg.5361	fig|1428.368.peg.5361	4
814	0	7.92	42.53	42.53	42.53	fig|1428.368.peg.3313	fig|1428.368.peg.3313	4
815	7.87	7.87	21.51	18.44	13.97	fig|11428.3.peg.4536	fig|11428.3.peg.4536	4
816	7.84	7.84	17.93	15.13	15.13	fig|11428.3.peg.1077	fig|11428.3.peg.1077	7
817	7.82	9.91	29.95	19.29	19.29	fig|1428.368.peg.2405	fig|1428.368.peg.2405	5
817	0	7.82	24.37	13.71	13.71	fig|11428.3.peg.5678	fig|11428.3.peg.5678	4
818	7.81	7.81	10.15	6.876	3.271	fig|11428.3.peg.5215	fig|11428.3.peg.5215	4
819	7.81	7.81	14.09	8.401	8.401	fig|11428.3.peg.1941	fig|11428.3.peg.1941	4
820	7.79	7.79	20.83	17.5	17.5	fig|11428.3.peg.212	fig|11428.3.peg.212	4
820	0	6.02	17.08	13.75	13.75	fig|1428.368.peg.882	fig|1428.368.peg.882	3
821	7.77	23.41	44.32	40.81	38.92	fig|1428.368.peg.4748	fig|1428.368.peg.4748	12
822	7.77	7.77	32.39	18.66	15.49	fig|11428.3.peg.893	fig|11428.3.peg.893	5
823	7.76	8.35	20.39	8.414	7.12	fig|1428.368.peg.1889	fig|1428.368.peg.1889	4
824	7.74	7.77	70.27	50	50	fig|1428.368.peg.3797	fig|1428.368.peg.3797	5
824	0	7.77	70.27	50	50	fig|11428.3.peg.2147	fig|11428.3.peg.2147	5
825	7.66	7.66	31.42	20.27	20.27	fig|11428.3.peg.5706	fig|11428.3.peg.5706	5
825	0	5.41	28.47	13.56	13.56	fig|1428.368.peg.5736	fig|1428.368.peg.5736	4
826	7.66	7.66	36.3	18.15	18.15	fig|1428.368.peg.5298	fig|1428.368.peg.5298	4
826	0	5.57	28.15	17.04	17.04	fig|11428.3.peg.4706	fig|11428.3.peg.4706	3
827	7.64	7.64	21.7	13.2	13.2	fig|11428.3.peg.1287	fig|11428.3.peg.1287	4
828	7.61	7.61	28.19	13.83	13.83	fig|11428.3.peg.3001	fig|11428.3.peg.3001	4
829	7.55	7.55	53.79	53.79	48.97	fig|11428.3.peg.3476	fig|11428.3.peg.3476	5
829	0	6.18	46.9	46.9	42.07	fig|1428.368.peg.2803	fig|1428.368.peg.2803	4
830	7.54	11.74	63.68	51.57	34.98	fig|11428.3.peg.5562	fig|11428.3.peg.5562	6
831	7.54	7.54	24.38	18.72	12.81	fig|11428.3.peg.4973	fig|11428.3.peg.4973	4
832	7.54	7.54	12.89	12.89	11.46	fig|11428.3.peg.387	fig|11428.3.peg.387	4
832	0	6	21.48	8.592	7.16	fig|1428.368.peg.275	fig|1428.368.peg.275	3
833	7.52	7.52	24.91	19.13	15.52	fig|11428.3.peg.1091	fig|11428.3.peg.1091	4
834	7.5	23.92	38.54	28.52	26.01	fig|1428.368.peg.3207	fig|1428.368.peg.3207	12
835	7.5	8.87	43.25	27.38	22.62	fig|1428.368.peg.1316	fig|1428.368.peg.1316	5
835	0	8.87	43.25	27.38	22.62	fig|11428.3.peg.4434	fig|11428.3.peg.4434	5
836	7.44	7.44	22.02	15.6	12.16	fig|11428.3.peg.953	fig|11428.3.peg.953	5
837	7.43	7.43	32.31	20	20	fig|11428.3.peg.4272	fig|11428.3.peg.4272	4
838	7.41	7.41	22.76	13.09	8.535	fig|11428.3.peg.325	fig|11428.3.peg.325	6
839	7.38	7.38	29.12	26.44	26.44	fig|11428.3.peg.1647	fig|11428.3.peg.1647	6
840	7.37	7.37	21.66	15.52	13.72	fig|11428.3.peg.5839	fig|11428.3.peg.5839	4
840	0	6.16	15.88	12.64	10.83	fig|1428.368.peg.6108	fig|1428.368.peg.6108	3
841	7.36	7.36	23.95	23.95	23.95	fig|1428.368.peg.4967	fig|1428.368.peg.4967	6
842	7.34	7.34	25.61	14.15	14.15	fig|11428.3.peg.3222	fig|11428.3.peg.3222	4
842	0	7.34	22.44	14.15	14.15	fig|1428.368.peg.3889	fig|1428.368.peg.3889	4
843	7.31	8.36	22.7	12.34	7.237	fig|11428.3.peg.6057	fig|11428.3.peg.6057	4
844	7.23	7.23	24.23	13.14	11.7	fig|11428.3.peg.1509	fig|11428.3.peg.1509	6
844	0	7.23	21.77	13.14	11.7	fig|1428.368.peg.4398	fig|1428.368.peg.4398	6
845	7.2	7.2	37.59	37.59	37.59	fig|1428.368.peg.4222	fig|1428.368.peg.4222	7
846	7.15	7.15	32.92	28.88	15.84	fig|11428.3.peg.5505	fig|11428.3.peg.5505	4
846	0	6.84	28.57	26.4	15.84	fig|1428.368.peg.780	fig|1428.368.peg.780	4
847	7.14	7.14	38.18	32.73	32.73	fig|1428.368.peg.3348	fig|1428.368.peg.3348	4
847	0	5.06	32.73	27.27	27.27	fig|11428.3.peg.4546	fig|11428.3.peg.4546	3
848	7.13	7.43	20.31	6.414	5.053	fig|11428.3.peg.2219	fig|11428.3.peg.2219	5
849	7.13	7.13	13.68	10.64	10.64	fig|11428.3.peg.2019	fig|11428.3.peg.2019	4
850	7.1	7.1	11.37	9.871	8.369	fig|11428.3.peg.213	fig|11428.3.peg.213	4
851	7.08	7.08	23.25	9.216	5.915	fig|11428.3.peg.1736	fig|11428.3.peg.1736	4
851	0	5.17	19.67	7.428	4.127	fig|1428.368.peg.5106	fig|1428.368.peg.5106	3
852	7.07	7.07	27.44	11.35	11.35	fig|11428.3.peg.1009	fig|11428.3.peg.1009	4
852	0	4.9	24.27	8.179	8.179	fig|1428.368.peg.4790	fig|1428.368.peg.4790	3
853	7.05	7.05	17.17	7.744	5.836	fig|1428.368.peg.6198	fig|1428.368.peg.6198	4
854	7.05	7.05	24.77	5.069	5.069	fig|1428.368.peg.5145	fig|1428.368.peg.5145	4
855	7	7	40.83	26.63	26.63	fig|11428.3.peg.4013	fig|11428.3.peg.4013	4
855	0	7	31.36	26.63	26.63	fig|1428.368.peg.5980	fig|1428.368.peg.5980	4
856	6.98	9.19	17.86	14.84	12.91	fig|1428.368.peg.3075	fig|1428.368.peg.3075	5
857	6.97	13.48	29.31	16.6	16.6	fig|1428.368.peg.619	fig|1428.368.peg.619	9
858	6.92	6.92	35.71	16.9	14.05	fig|11428.3.peg.5516	fig|11428.3.peg.5516	5
859	6.9	6.9	29.19	16.11	14.09	fig|1428.368.peg.5668	fig|1428.368.peg.5668	4
859	0	6.9	29.19	16.11	14.09	fig|11428.3.peg.5088	fig|11428.3.peg.5088	4
860	6.89	6.89	22.38	10.26	10.26	fig|1428.368.peg.5063	fig|1428.368.peg.5063	4
861	6.85	6.85	52.78	45.37	45.37	fig|11428.3.peg.135	fig|11428.3.peg.135	4
862	6.83	6.83	26.05	18.01	15.71	fig|11428.3.peg.3970	fig|11428.3.peg.3970	4
863	6.81	6.81	29.86	13.62	11.88	fig|1428.368.peg.4390	fig|1428.368.peg.4390	4
864	6.79	32.17	34.52	28.66	28.66	fig|11428.3.peg.3539	fig|11428.3.peg.3539	16
865	6.79	6.79	18.65	12.9	9.722	fig|11428.3.peg.820	fig|11428.3.peg.820	4
866	6.76	6.76	20.33	14.43	14.43	fig|11428.3.peg.81	fig|11428.3.peg.81	4
867	6.73	11.15	61.24	53.49	51.16	fig|11428.3.peg.6110	fig|11428.3.peg.6110	9
868	6.71	6.71	34.52	29.17	29.17	fig|1428.368.peg.3986	fig|1428.368.peg.3986	4
868	0	6.71	34.52	29.17	29.17	fig|11428.3.peg.3126	fig|11428.3.peg.3126	4
869	6.66	6.89	26.51	20.47	18.12	fig|11428.3.peg.1397	fig|11428.3.peg.1397	5
869	0	4.77	21.14	15.1	12.75	fig|1428.368.peg.5231	fig|1428.368.peg.5231	4
870	6.62	6.62	33.08	33.08	33.08	fig|1428.368.peg.2927	fig|1428.368.peg.2927	4
870	0	6.62	33.08	33.08	33.08	fig|11428.3.peg.4644	fig|11428.3.peg.4644	4
871	6.59	6.59	18.65	11.93	11.93	fig|11428.3.peg.1419	fig|11428.3.peg.1419	4
872	6.59	6.59	22.43	18.22	18.22	fig|11428.3.peg.3161	fig|11428.3.peg.3161	4
872	0	6	21.5	14.02	14.02	fig|1428.368.peg.3949	fig|1428.368.peg.3949	3
873	6.56	6.56	21.45	19.56	15.14	fig|11428.3.peg.3551	fig|11428.3.peg.3551	3
874	6.51	6.51	51.16	51.16	48.84	fig|11428.3.peg.1727	fig|11428.3.peg.1727	4
875	6.48	6.48	17.13	7.32	6.077	fig|11428.3.peg.461	fig|11428.3.peg.461	4
875	0	8.54	22.16	8.172	6.925	fig|1428.368.peg.2132	fig|1428.368.peg.2132	5
876	6.46	8.63	26.93	8.376	8.376	fig|11428.3.peg.5266	fig|11428.3.peg.5266	6
876	0	8.63	24.1	8.376	8.376	fig|1428.368.peg.4505	fig|1428.368.peg.4505	6
877	6.44	6.44	21.17	15.96	15.96	fig|1428.368.peg.5143	fig|1428.368.peg.5143	4
877	0	6.44	21.17	15.96	15.96	fig|11428.3.peg.1770	fig|11428.3.peg.1770	4
878	6.42	6.42	51.91	37.4	37.4	fig|11428.3.peg.346	fig|11428.3.peg.346	4
879	6.37	6.37	26.12	26.12	26.12	fig|11428.3.peg.1914	fig|11428.3.peg.1914	4
880	6.36	6.36	29.97	20.91	14.29	fig|11428.3.peg.3656	fig|11428.3.peg.3656	3
881	6.32	6.32	28.16	18.35	13.92	fig|1428.368.peg.2872	fig|1428.368.peg.2872	3
882	6.31	6.31	10.26	10.26	8.159	fig|11428.3.peg.2929	fig|11428.3.peg.2929	3
883	6.29	6.29	27.03	13.81	9.91	fig|11428.3.peg.3725	fig|11428.3.peg.3725	3
883	0	6.29	25.23	13.81	9.91	fig|1428.368.peg.4135	fig|1428.368.peg.4135	3
884	6.28	45.01	44.52	36.57	31.1	fig|11428.3.peg.5520	fig|11428.3.peg.5520	39
885	6.28	6.28	22.31	10.59	9.452	fig|1428.368.peg.2141	fig|1428.368.peg.2141	4
885	0	6.28	17.99	10.61	9.47	fig|11428.3.peg.453	fig|11428.3.peg.453	4
886	6.28	6.28	15.56	12.67	8.222	fig|1428.368.peg.4003	fig|1428.368.peg.4003	3
886	0	6.28	12.67	12.67	8.222	fig|11428.3.peg.3110	fig|11428.3.peg.3110	3
887	6.24	6.24	42.26	25.28	16.6	fig|11428.3.peg.568	fig|11428.3.peg.568	3
888	6.24	6.24	39.18	22.68	17.01	fig|1428.368.peg.5766	fig|1428.368.peg.5766	3
889	6.24	6.24	26.86	22.29	22.29	fig|1428.368.peg.4030	fig|1428.368.peg.4030	4
890	6.22	6.31	15.69	8.211	4.167	fig|11428.3.peg.1355	fig|11428.3.peg.1355	3
891	6.2	6.2	24.05	11.83	8.397	fig|11428.3.peg.1293	fig|11428.3.peg.1293	3
892	6.2	6.2	20.05	11.06	9.217	fig|11428.3.peg.3189	fig|11428.3.peg.3189	3
892	0	6.2	16.36	11.06	9.217	fig|1428.368.peg.3921	fig|1428.368.peg.3921	3
893	6.19	38.43	54.24	51.16	49.1	fig|1428.368.peg.2136	fig|1428.368.peg.2136	26
894	6.19	6.19	18.09	16.45	13.82	fig|11428.3.peg.3742	fig|11428.3.peg.3742	3
895	6.14	6.14	17.66	12.65	12.65	fig|11428.3.peg.3426	fig|11428.3.peg.3426	4
895	0	6.02	14.32	9.308	9.308	fig|1428.368.peg.2751	fig|1428.368.peg.2751	3
896	6.13	6.13	52.8	52.8	40.8	fig|11428.3.peg.4932	fig|11428.3.peg.4932	3
897	6.12	26.83	64.34	50.7	41.61	fig|1428.368.peg.6388	fig|1428.368.peg.6388	14
898	6.11	6.11	27.11	19.37	15.14	fig|1428.368.peg.6043	fig|1428.368.peg.6043	3
899	6.11	6.11	22.1	14.73	11.33	fig|1428.368.peg.1829	fig|1428.368.peg.1829	3
899	0	4.1	21.63	10.96	7.584	fig|11428.3.peg.3019	fig|11428.3.peg.3019	2
900	6.11	6.11	15.03	10.66	8.743	fig|1428.368.peg.4153	fig|1428.368.peg.4153	3
900	0	4.1	14.48	7.65	5.738	fig|11428.3.peg.3707	fig|11428.3.peg.3707	2
901	6.09	6.09	20.49	10.69	10.69	fig|11428.3.peg.3176	fig|11428.3.peg.3176	4
901	0	6.08	18.71	10.69	10.69	fig|1428.368.peg.3934	fig|1428.368.peg.3934	4
902	6.09	6.09	53.33	36	19.33	fig|11428.3.peg.2279	fig|11428.3.peg.2279	3
903	6.09	6.09	55.43	36.96	35.87	fig|1428.368.peg.6318	fig|1428.368.peg.6318	4
903	0	6.09	55.43	36.96	35.87	fig|11428.3.peg.1970	fig|11428.3.peg.1970	4
904	6.09	6.09	12.08	8.125	8.125	fig|1428.368.peg.1761	fig|1428.368.peg.1761	4
905	6.07	6.07	36.81	27.08	27.08	fig|1428.368.peg.3637	fig|1428.368.peg.3637	4
905	0	6.07	36.81	27.08	27.08	fig|11428.3.peg.2997	fig|11428.3.peg.2997	4
906	6.07	6.07	25.45	25.45	22.32	fig|1428.368.peg.4753	fig|1428.368.peg.4753	4
906	0	6.07	25.45	25.45	22.32	fig|11428.3.peg.972	fig|11428.3.peg.972	4
907	6.06	91.22	64.49	55.49	54.25	fig|1428.368.peg.6351	fig|1428.368.peg.6351	50
908	6.06	6.06	28.63	16.08	16.08	fig|1428.368.peg.4754	fig|1428.368.peg.4754	3
908	0	6.04	26.27	16.08	16.08	fig|11428.3.peg.973	fig|11428.3.peg.973	3
909	6.05	6.05	18.18	9.091	9.091	fig|1428.368.peg.6010	fig|1428.368.peg.6010	3
910	6.03	8.06	63.76	42.28	29.53	fig|1428.368.peg.2234	fig|1428.368.peg.2234	6
911	6.03	6.03	27.87	12.79	12.79	fig|1428.368.peg.1304	fig|1428.368.peg.1304	3
911	0	6.03	27.87	12.79	12.79	fig|11428.3.peg.4447	fig|11428.3.peg.4447	3
912	6.02	52.17	56.98	56.98	56.98	fig|1428.368.peg.1561	fig|1428.368.peg.1561	35
913	6.02	6.02	33.5	11.34	11.34	fig|11428.3.peg.3752	fig|11428.3.peg.3752	3
914	6.02	6.02	20.55	10.35	5.023	fig|11428.3.peg.3159	fig|11428.3.peg.3159	3
915	6.02	6.02	15.69	11.03	9.069	fig|11428.3.peg.5236	fig|11428.3.peg.5236	3
916	6.02	6.02	26.64	17.03	17.03	fig|11428.3.peg.2504	fig|11428.3.peg.2504	3
916	0	6	17.03	17.03	17.03	fig|1428.368.peg.3748	fig|1428.368.peg.3748	3
917	6.02	6.02	34.62	21.54	21.54	fig|1428.368.peg.6288	fig|1428.368.peg.6288	3
917	0	6.02	34.62	21.54	21.54	fig|11428.3.peg.2000	fig|11428.3.peg.2000	3
918	6.02	6.02	18.83	10.39	10.39	fig|1428.368.peg.2426	fig|1428.368.peg.2426	3
919	6.01	6.01	22.03	7.345	7.345	fig|1428.368.peg.1466	fig|1428.368.peg.1466	3
920	6.01	6.01	16.78	9.456	9.456	fig|1428.368.peg.3360	fig|1428.368.peg.3360	3
920	0	6.01	16.78	9.456	9.456	fig|11428.3.peg.4533	fig|11428.3.peg.4533	3
921	6.01	6.01	28.79	24.24	16.67	fig|1428.368.peg.3682	fig|1428.368.peg.3682	5
922	6.01	6.01	21.1	14.77	14.77	fig|11428.3.peg.5299	fig|11428.3.peg.5299	3
923	6	114.5	94.35	94.35	94.35	fig|1428.368.peg.3459	fig|1428.368.peg.3459	84
924	6	85.97	75.76	71.55	69.87	fig|1428.368.peg.5634	fig|1428.368.peg.5634	57
925	6	59.98	61.93	58.33	58.33	fig|11428.3.peg.4018	fig|11428.3.peg.4018	41
926	6	42.1	77.11	77.11	77.11	fig|11428.3.peg.4561	fig|11428.3.peg.4561	36
927	6	36.04	56.82	53.54	53.54	fig|11428.3.peg.2074	fig|11428.3.peg.2074	25
928	6	30.05	57.04	48.11	48.11	fig|1428.368.peg.3589	fig|1428.368.peg.3589	16
929	6	27.63	59.94	57.42	55.74	fig|1428.368.peg.6045	fig|1428.368.peg.6045	17
930	6	22.01	39.25	33.02	33.02	fig|1428.368.peg.3181	fig|1428.368.peg.3181	12
931	6	18.53	44.17	40	38.61	fig|1428.368.peg.313	fig|1428.368.peg.313	10
932	6	8	40.94	33.92	33.92	fig|11428.3.peg.5191	fig|11428.3.peg.5191	4
933	6	6.38	29.02	20.28	18.18	fig|11428.3.peg.5576	fig|11428.3.peg.5576	3
933	0	4.32	16.43	13.64	11.54	fig|1428.368.peg.2505	fig|1428.368.peg.2505	2
934	6	6.24	48.12	39.85	35.34	fig|11428.3.peg.2189	fig|11428.3.peg.2189	3
935	6	6	41.67	30.56	30.56	fig|1428.368.peg.2898	fig|1428.368.peg.2898	3
935	0	6	41.67	30.56	30.56	fig|11428.3.peg.4672	fig|11428.3.peg.4672	3
936	6	6	36.81	22.22	22.22	fig|11428.3.peg.2903	fig|11428.3.peg.2903	3
937	6	6	22.27	15.28	15.28	fig|1428.368.peg.70	fig|1428.368.peg.70	3
938	6	6	34.17	25	25	fig|1428.368.peg.6385	fig|1428.368.peg.6385	3
938	0	6	34.17	25	25	fig|11428.3.peg.3266	fig|11428.3.peg.3266	3
939	6	6	29.61	15.88	15.88	fig|1428.368.peg.1860	fig|1428.368.peg.1860	3
940	6	6	45.56	24.26	24.26	fig|11428.3.peg.4488	fig|11428.3.peg.4488	3
940	0	4	23.08	14.79	14.79	fig|1428.368.peg.3402	fig|1428.368.peg.3402	2
941	6	6	21.85	15.13	15.13	fig|11428.3.peg.3139	fig|11428.3.peg.3139	3
941	0	4	18.49	10.5	10.5	fig|1428.368.peg.3973	fig|1428.368.peg.3973	2
942	6	6	25.6	21.6	21.6	fig|1428.368.peg.5153	fig|1428.368.peg.5153	3
943	6	6	18.49	14.34	14.34	fig|1428.368.peg.4483	fig|1428.368.peg.4483	3
943	0	6	18.49	14.34	14.34	fig|11428.3.peg.714	fig|11428.3.peg.714	3
944	6	6	37.27	31.82	31.82	fig|1428.368.peg.2782	fig|1428.368.peg.2782	3
945	6	6	16.91	13.04	13.04	fig|1428.368.peg.2676	fig|1428.368.peg.2676	3
945	0	6	16.91	13.04	13.04	fig|11428.3.peg.3351	fig|11428.3.peg.3351	3
946	6	6	36.67	31.11	31.11	fig|11428.3.peg.2234	fig|11428.3.peg.2234	4
946	0.04	4.1	36.67	31.11	18.89	fig|1428.368.peg.3434	fig|1428.368.peg.3434	3
947	6	6	18.18	11.69	11.69	fig|11428.3.peg.1663	fig|11428.3.peg.1663	3
948	6	6	12.84	10.12	10.12	fig|11428.3.peg.1372	fig|11428.3.peg.1372	3
948	0	4	5.058	5.058	5.058	fig|1428.368.peg.5441	fig|1428.368.peg.5441	2
949	6	6	7.173	7.173	7.173	fig|1428.368.peg.3558	fig|1428.368.peg.3558	3
949	0	4	6.962	4.219	4.219	fig|11428.3.peg.2881	fig|11428.3.peg.2881	2
950	6	6	16.51	16.51	16.51	fig|1428.368.peg.2612	fig|1428.368.peg.2612	3
951	6	6	12.54	12.54	12.54	fig|1428.368.peg.2392	fig|1428.368.peg.2392	3
951	0	6	12.54	12.54	12.54	fig|11428.3.peg.2624	fig|11428.3.peg.2624	3
952	6	6	20.14	20.14	20.14	fig|11428.3.peg.5552	fig|11428.3.peg.5552	3
953	6	6	13.51	13.51	13.51	fig|11428.3.peg.3755	fig|11428.3.peg.3755	9
954	6	6	22.35	22.35	22.35	fig|11428.3.peg.2276	fig|11428.3.peg.2276	3
954	0	4	8.876	8.876	8.876	fig|1428.368.peg.2515	fig|1428.368.peg.2515	2
955	5.96	6.04	22.02	9.174	9.174	fig|11428.3.peg.4464	fig|11428.3.peg.4464	3
955	0	6.04	19.88	9.174	9.174	fig|1428.368.peg.1282	fig|1428.368.peg.1282	3
956	5.95	5.95	20.76	13.98	11.86	fig|11428.3.peg.957	fig|11428.3.peg.957	3
957	5.93	5.93	17.06	14.05	14.05	fig|11428.3.peg.2076	fig|11428.3.peg.2076	3
958	5.9	5.9	17.21	7.45	5.247	fig|11428.3.peg.5148	fig|11428.3.peg.5148	4
959	5.89	5.89	40.21	24.74	24.74	fig|1428.368.peg.3120	fig|1428.368.peg.3120	3
960	5.89	5.89	17.8	13.64	13.64	fig|1428.368.peg.3868	fig|1428.368.peg.3868	3
960	0	5.89	17.8	13.64	13.64	fig|11428.3.peg.3244	fig|11428.3.peg.3244	3
961	5.89	5.89	39.1	33.83	27.82	fig|11428.3.peg.4563	fig|11428.3.peg.4563	3
961	0	3.71	36.84	24.81	18.8	fig|1428.368.peg.3332	fig|1428.368.peg.3332	2
962	5.87	5.87	17.11	14.47	14.47	fig|11428.3.peg.93	fig|11428.3.peg.93	4
963	5.86	5.86	18.61	7.444	7.444	fig|11428.3.peg.5713	fig|11428.3.peg.5713	3
964	5.85	45.85	53.36	53.36	47.05	fig|1428.368.peg.2590	fig|1428.368.peg.2590	25
965	5.83	34.23	46.95	46.95	46.95	fig|1428.368.peg.2830	fig|1428.368.peg.2830	18
966	5.83	5.83	22.48	16.51	10.32	fig|11428.3.peg.1474	fig|11428.3.peg.1474	4
966	0	3.59	15.14	9.174	7.339	fig|1428.368.peg.6054	fig|1428.368.peg.6054	3
967	5.83	5.83	20.35	13.42	13.42	fig|11428.3.peg.4300	fig|11428.3.peg.4300	3
967	0	5.83	13.85	13.42	13.42	fig|1428.368.peg.5901	fig|1428.368.peg.5901	3
968	5.82	5.82	18.62	10.71	6.633	fig|1428.368.peg.6087	fig|1428.368.peg.6087	3
969	5.81	5.81	18.02	10.53	6.599	fig|11428.3.peg.5524	fig|11428.3.peg.5524	4
970	5.8	5.8	24.08	11.01	8.716	fig|1428.368.peg.3554	fig|1428.368.peg.3554	4
970	0	5.8	17.98	10.53	8.333	fig|11428.3.peg.2885	fig|11428.3.peg.2885	4
971	5.78	5.78	34.15	19.67	16.39	fig|11428.3.peg.1283	fig|11428.3.peg.1283	4
972	5.77	5.77	11.73	8.951	8.951	fig|11428.3.peg.1284	fig|11428.3.peg.1284	3
973	5.75	5.75	25.53	5.556	5.556	fig|1428.368.peg.5849	fig|1428.368.peg.5849	3
973	0	5.75	20.27	5.556	5.556	fig|11428.3.peg.569	fig|11428.3.peg.569	3
974	5.75	5.75	32.86	32.86	32.86	fig|1428.368.peg.4995	fig|1428.368.peg.4995	3
975	5.73	5.73	51.95	48.05	46.75	fig|1428.368.peg.3939	fig|1428.368.peg.3939	3
975	0	5.73	51.95	48.05	46.75	fig|11428.3.peg.3171	fig|11428.3.peg.3171	3
976	5.72	5.72	35	26.5	21	fig|11428.3.peg.1346	fig|11428.3.peg.1346	3
977	5.71	5.71	33.73	9.94	9.94	fig|11428.3.peg.3530	fig|11428.3.peg.3530	3
977	0	5.7	15.96	9.94	9.94	fig|1428.368.peg.2858	fig|1428.368.peg.2858	3
978	5.66	5.67	21.29	13.55	9.677	fig|1428.368.peg.2219	fig|1428.368.peg.2219	3
978	0	5.66	19.35	13.55	9.677	fig|11428.3.peg.468	fig|11428.3.peg.468	3
979	5.65	5.65	16.92	16.31	10.57	fig|1428.368.peg.343	fig|1428.368.peg.343	3
979	0	5.65	16.92	16.31	10.57	fig|11428.3.peg.330	fig|11428.3.peg.330	3
980	5.64	5.64	17.18	13.1	9.17	fig|11428.3.peg.3465	fig|11428.3.peg.3465	4
980	0	5.64	15.87	13.1	9.17	fig|1428.368.peg.2791	fig|1428.368.peg.2791	4
981	5.62	5.62	46.75	38.96	38.96	fig|1428.368.peg.1165	fig|1428.368.peg.1165	7
982	5.59	5.59	32.05	22.44	22.44	fig|1428.368.peg.3989	fig|1428.368.peg.3989	3
982	0	5.59	22.44	22.44	22.44	fig|11428.3.peg.3123	fig|11428.3.peg.3123	3
983	5.58	5.58	12.64	9.524	6.41	fig|11428.3.peg.509	fig|11428.3.peg.509	4
984	5.58	5.58	21.47	18.08	18.08	fig|1428.368.peg.481	fig|1428.368.peg.481	4
984	0	5.57	18.08	18.08	18.08	fig|11428.3.peg.788	fig|11428.3.peg.788	4
985	5.57	5.57	40.23	40.23	40.23	fig|1428.368.peg.2491	fig|1428.368.peg.2491	3
986	5.56	5.56	42.24	24.14	24.14	fig|11428.3.peg.460	fig|11428.3.peg.460	4
986	0	4.7	29.31	11.21	11.21	fig|1428.368.peg.2133	fig|1428.368.peg.2133	3
987	5.56	5.56	27.03	27.03	22.3	fig|11428.3.peg.6144	fig|11428.3.peg.6144	4
988	5.51	5.51	36.67	31.11	31.11	fig|1428.368.peg.3814	fig|1428.368.peg.3814	3
988	0	5.51	36.67	31.11	31.11	fig|11428.3.peg.2131	fig|11428.3.peg.2131	3
988	0	4	18.89	18.89	18.89	fig|11428.3.peg.6114	fig|11428.3.peg.6114	2
988	0	4	18.89	18.89	18.89	fig|11428.3.peg.6111	fig|11428.3.peg.6111	2
988	0	4	18.89	18.89	18.89	fig|11428.3.peg.4240	fig|11428.3.peg.4240	2
989	5.5	5.5	50	40.91	40.91	fig|1428.368.peg.1738	fig|1428.368.peg.1738	4
989	0	5.5	50	40.91	40.91	fig|11428.3.peg.2458	fig|11428.3.peg.2458	4
990	5.47	5.47	20.61	12.02	12.02	fig|11428.3.peg.2769	fig|11428.3.peg.2769	4
990	0	4.4	15.65	7.061	7.061	fig|1428.368.peg.1035	fig|1428.368.peg.1035	3
991	5.46	32.39	45.05	40.11	40.11	fig|11428.3.peg.5791	fig|11428.3.peg.5791	20
992	5.45	5.45	22.53	19.37	19.37	fig|11428.3.peg.4400	fig|11428.3.peg.4400	3
992	0	3.32	16.6	13.44	13.44	fig|1428.368.peg.4252	fig|1428.368.peg.4252	2
993	5.44	5.44	15.6	13.37	13.37	fig|11428.3.peg.1871	fig|11428.3.peg.1871	4
994	5.43	12.31	56.33	46.84	41.77	fig|11428.3.peg.3517	fig|11428.3.peg.3517	6
995	5.42	5.42	24.63	11.44	8.955	fig|11428.3.peg.898	fig|11428.3.peg.898	4
995	0	4.03	23.13	7.463	7.463	fig|1428.368.peg.4678	fig|1428.368.peg.4678	3
996	5.41	23.31	20.69	14.85	14.72	fig|11428.3.peg.3291	fig|11428.3.peg.3291	13
997	5.37	5.37	25.53	13.12	13.12	fig|11428.3.peg.5207	fig|11428.3.peg.5207	3
998	5.37	5.37	31.82	23.55	19.01	fig|11428.3.peg.4658	fig|11428.3.peg.4658	4
999	5.29	5.3	20	18.89	18.89	fig|1428.368.peg.3136	fig|1428.368.peg.3136	4
999	0	5.3	20	18.89	18.89	fig|11428.3.peg.5738	fig|11428.3.peg.5738	4
1000	5.25	5.25	23.25	12.1	6.994	fig|1428.368.peg.1909	fig|1428.368.peg.1909	3
1000	0	5.25	23.3	12.12	7.008	fig|11428.3.peg.1926	fig|11428.3.peg.1926	3
1001	5.24	82.77	89.87	89.87	88.05	fig|1428.368.peg.2148	fig|1428.368.peg.2148	51
1002	5.23	5.23	13.81	6.667	6.667	fig|11428.3.peg.968	fig|11428.3.peg.968	3
1003	5.23	5.23	15.33	8	8	fig|11428.3.peg.4643	fig|11428.3.peg.4643	3
1003	0	3.1	11.78	4.444	4.444	fig|1428.368.peg.2928	fig|1428.368.peg.2928	2
1004	5.21	5.21	15.07	15.07	15.07	fig|1428.368.peg.5573	fig|1428.368.peg.5573	3
1004	0	5.21	15.07	15.07	15.07	fig|11428.3.peg.4996	fig|11428.3.peg.4996	3
1005	5.21	5.21	50	50	50	fig|1428.368.peg.3867	fig|1428.368.peg.3867	3
1005	0	5.21	50	50	50	fig|11428.3.peg.3245	fig|11428.3.peg.3245	3
1006	5.2	5.2	21.94	16.61	12.54	fig|11428.3.peg.5426	fig|11428.3.peg.5426	3
1006	0	4.01	12.23	9.091	9.091	fig|1428.368.peg.1341	fig|1428.368.peg.1341	2
1007	5.18	6.86	23.23	15.15	12.46	fig|11428.3.peg.3835	fig|11428.3.peg.3835	4
1007	0.01	4.68	21.89	11.11	8.418	fig|1428.368.peg.5486	fig|1428.368.peg.5486	3
1008	5.16	5.16	30.6	15.09	14.66	fig|11428.3.peg.1058	fig|11428.3.peg.1058	3
1009	5.16	5.16	22.82	15.77	11.2	fig|1428.368.peg.1380	fig|1428.368.peg.1380	3
1010	5.15	5.16	32.97	24.18	24.18	fig|1428.368.peg.3586	fig|1428.368.peg.3586	3
1011	5.14	5.14	17.41	7.85	6.314	fig|11428.3.peg.570	fig|11428.3.peg.570	3
1011	0	2.21	13.82	5.461	3.925	fig|1428.368.peg.5848	fig|1428.368.peg.5848	2
1012	5.14	5.14	28.98	28.98	23.3	fig|11428.3.peg.942	fig|11428.3.peg.942	3
1012	0	2.95	19.89	19.89	14.2	fig|1428.368.peg.4724	fig|1428.368.peg.4724	2
1013	5.11	5.11	15.73	4.337	3.146	fig|11428.3.peg.5749	fig|11428.3.peg.5749	4
1013	0	5.09	10.2	4.337	3.146	fig|1428.368.peg.3125	fig|1428.368.peg.3125	4
1014	5.11	5.11	30.33	10.88	8.577	fig|11428.3.peg.3836	fig|11428.3.peg.3836	3
1014	0	4.03	23.01	5.649	5.649	fig|1428.368.peg.5487	fig|1428.368.peg.5487	2
1015	5.11	5.11	51.52	36.36	36.36	fig|1428.368.peg.6171	fig|1428.368.peg.6171	3
1015	0	5.11	51.52	36.36	36.36	fig|11428.3.peg.5933	fig|11428.3.peg.5933	3
1016	5.11	5.11	9.763	6.805	6.805	fig|11428.3.peg.4370	fig|11428.3.peg.4370	3
1017	5.09	5.09	18.21	12.89	8.964	fig|11428.3.peg.731	fig|11428.3.peg.731	3
1018	5.07	5.07	12.3	12.3	12.3	fig|11428.3.peg.5347	fig|11428.3.peg.5347	3
1019	5.06	5.06	16.32	11.66	8.031	fig|1428.368.peg.2873	fig|1428.368.peg.2873	3
1020	5.05	5.05	28.68	18.6	15.89	fig|11428.3.peg.892	fig|11428.3.peg.892	4
1021	5.05	5.05	11.9	11.9	9.62	fig|11428.3.peg.2527	fig|11428.3.peg.2527	3
1022	5.04	5.04	18.06	14.98	12.78	fig|11428.3.peg.1645	fig|11428.3.peg.1645	3
1023	5.04	5.04	14.1	14.1	14.1	fig|1428.368.peg.4968	fig|1428.368.peg.4968	3
1024	5.03	5.03	29.88	21.34	21.34	fig|1428.368.peg.5753	fig|1428.368.peg.5753	3
1025	4.99	4.99	45.83	36.46	36.46	fig|11428.3.peg.708	fig|11428.3.peg.708	3
1025	0	2.74	46.88	21.88	21.88	fig|1428.368.peg.4477	fig|1428.368.peg.4477	2
1026	4.98	12.65	38.04	22.1	22.1	fig|1428.368.peg.1215	fig|1428.368.peg.1215	8
1027	4.98	4.98	11.11	7.355	5.634	fig|11428.3.peg.1654	fig|11428.3.peg.1654	3
1027	0	4.62	9.39	5.634	5.634	fig|1428.368.peg.5002	fig|1428.368.peg.5002	3
1028	4.97	4.97	23.01	12.55	12.55	fig|1428.368.peg.5468	fig|1428.368.peg.5468	3
1028	0	4.97	23.01	12.55	12.55	fig|11428.3.peg.1338	fig|11428.3.peg.1338	3
1029	4.94	4.94	23.79	11.51	9.463	fig|1428.368.peg.874	fig|1428.368.peg.874	3
1029	0	2.79	15.86	8.184	6.138	fig|11428.3.peg.220	fig|11428.3.peg.220	2
1030	4.93	4.93	19.34	19.34	19.34	fig|11428.3.peg.304	fig|11428.3.peg.304	3
1031	4.92	7	15.11	11.54	11.54	fig|1428.368.peg.2246	fig|1428.368.peg.2246	5
1032	4.9	4.9	11.2	11.2	7.563	fig|1428.368.peg.6349	fig|1428.368.peg.6349	3
1032	0	4.9	11.2	11.2	7.563	fig|11428.3.peg.1940	fig|11428.3.peg.1940	3
1033	4.9	4.9	28.47	26.28	26.28	fig|1428.368.peg.514	fig|1428.368.peg.514	3
1033	0	4.9	28.68	26.47	26.47	fig|11428.3.peg.812	fig|11428.3.peg.812	3
1034	4.85	5.15	10.92	2.051	0.9248	fig|11428.3.peg.51	fig|11428.3.peg.51	4
1035	4.85	4.85	18.77	12.59	10.12	fig|11428.3.peg.5206	fig|11428.3.peg.5206	3
1036	4.84	4.85	10.43	5.213	5.213	fig|1428.368.peg.3594	fig|1428.368.peg.3594	4
1036	0	4.85	9.479	5.213	5.213	fig|11428.3.peg.2845	fig|11428.3.peg.2845	4
1037	4.81	108.32	46.9	41.38	41.38	fig|1428.368.peg.6330	fig|1428.368.peg.6330	58
1038	4.81	4.81	34.54	13.4	13.4	fig|11428.3.peg.1508	fig|11428.3.peg.1508	3
1038	0	4.81	25.26	13.4	13.4	fig|1428.368.peg.4397	fig|1428.368.peg.4397	3
1039	4.79	4.79	40.23	40.23	40.23	fig|1428.368.peg.4670	fig|1428.368.peg.4670	3
1039	0	2.68	27.59	27.59	27.59	fig|11428.3.peg.889	fig|11428.3.peg.889	2
1040	4.77	4.77	22.01	14.47	14.47	fig|1428.368.peg.2369	fig|1428.368.peg.2369	3
1041	4.76	4.76	7.704	5.547	4.16	fig|11428.3.peg.1653	fig|11428.3.peg.1653	3
1042	4.73	4.73	18.82	7.822	7.822	fig|11428.3.peg.5473	fig|11428.3.peg.5473	3
1043	4.73	4.73	15.33	8.639	8.639	fig|1428.368.peg.6113	fig|1428.368.peg.6113	3
1043	0	4.06	19.48	7.143	5.844	fig|11428.3.peg.5833	fig|11428.3.peg.5833	2
1044	4.72	4.72	19.48	16.91	11.46	fig|11428.3.peg.5248	fig|11428.3.peg.5248	3
1044	0	3.81	14.66	12.93	7.471	fig|1428.368.peg.4517	fig|1428.368.peg.4517	2
1045	4.7	4.7	29.13	29.13	28.35	fig|11428.3.peg.5703	fig|11428.3.peg.5703	3
1045	0	4.03	29.13	21.26	20.47	fig|1428.368.peg.5739	fig|1428.368.peg.5739	2
1046	4.68	4.68	14.73	7.752	7.752	fig|1428.368.peg.2747	fig|1428.368.peg.2747	3
1046	0.03	2.62	20.67	6.718	4.91	fig|11428.3.peg.3422	fig|11428.3.peg.3422	2
1047	4.66	4.66	22.91	12.29	12.29	fig|11428.3.peg.1493	fig|11428.3.peg.1493	4
1047	0	4.64	20.39	12.29	12.29	fig|1428.368.peg.4382	fig|1428.368.peg.4382	4
1048	4.66	4.66	57.55	33.02	33.02	fig|1428.368.peg.2273	fig|1428.368.peg.2273	3
1048	0	4.66	57.55	33.02	33.02	fig|11428.3.peg.5141	fig|11428.3.peg.5141	3
1049	4.65	4.65	21.96	21.96	18.22	fig|11428.3.peg.3834	fig|11428.3.peg.3834	3
1049	0	4.06	16.23	16.23	12.72	fig|1428.368.peg.5485	fig|1428.368.peg.5485	2
1050	4.63	4.63	21.64	7.563	7.563	fig|1428.368.peg.5112	fig|1428.368.peg.5112	3
1050	0	4.63	19.15	8.511	8.511	fig|11428.3.peg.1739	fig|11428.3.peg.1739	3
1051	4.63	4.63	43.51	43.51	43.51	fig|11428.3.peg.1006	fig|11428.3.peg.1006	5
1051	0.01	2.6	38.78	38.78	19.73	fig|1428.368.peg.4787	fig|1428.368.peg.4787	3
1052	4.61	4.61	18.29	14.23	14.23	fig|11428.3.peg.2475	fig|11428.3.peg.2475	3
1052	0	2.49	13.01	8.943	8.943	fig|1428.368.peg.1722	fig|1428.368.peg.1722	2
1053	4.6	4.6	25.43	14.57	7.174	fig|11428.3.peg.5782	fig|11428.3.peg.5782	2
1054	4.58	4.58	11.92	7.473	7.473	fig|1428.368.peg.3635	fig|1428.368.peg.3635	4
1054	0	4.57	12.46	7.473	7.473	fig|11428.3.peg.2995	fig|11428.3.peg.2995	4
1055	4.58	4.58	23.26	17.05	5.814	fig|11428.3.peg.3445	fig|11428.3.peg.3445	2
1055	0.04	4.44	17.83	17.05	5.814	fig|1428.368.peg.2771	fig|1428.368.peg.2771	2
1056	4.57	4.57	21.19	16.36	10.41	fig|11428.3.peg.2058	fig|11428.3.peg.2058	2
1057	4.57	4.57	42.59	37.04	37.04	fig|1428.368.peg.2173	fig|1428.368.peg.2173	3
1058	4.55	38.08	59.85	55.56	44.44	fig|11428.3.peg.5500	fig|11428.3.peg.5500	21
1059	4.55	4.55	12.32	12.32	8.099	fig|11428.3.peg.178	fig|11428.3.peg.178	2
1060	4.55	4.55	10.44	10.44	10.44	fig|11428.3.peg.2912	fig|11428.3.peg.2912	4
1061	4.54	36.93	46.62	46.62	45.11	fig|1428.368.peg.5977	fig|1428.368.peg.5977	21
1062	4.54	4.54	27.9	11.59	11.59	fig|1428.368.peg.5471	fig|1428.368.peg.5471	3
1062	0	4.54	25.09	11.64	11.64	fig|11428.3.peg.1336	fig|11428.3.peg.1336	3
1063	4.53	4.55	32.86	12.72	12.72	fig|11428.3.peg.717	fig|11428.3.peg.717	3
1064	4.53	4.53	17.76	10.59	10.59	fig|1428.368.peg.4423	fig|1428.368.peg.4423	3
1064	0	4.5	13.55	10.97	10.97	fig|11428.3.peg.1533	fig|11428.3.peg.1533	3
1065	4.53	4.53	38.82	21.05	21.05	fig|1428.368.peg.5512	fig|1428.368.peg.5512	3
1065	0	4.53	38.82	21.05	21.05	fig|11428.3.peg.3860	fig|11428.3.peg.3860	3
1066	4.52	4.52	19.54	7.815	6.572	fig|1428.368.peg.5601	fig|1428.368.peg.5601	3
1066	0	4.36	12.79	6.572	6.572	fig|11428.3.peg.5024	fig|11428.3.peg.5024	3
1067	4.5	12.89	35	30.36	30.36	fig|11428.3.peg.3743	fig|11428.3.peg.3743	7
1068	4.47	4.47	12.2	9.449	9.449	fig|11428.3.peg.4035	fig|11428.3.peg.4035	3
1068	0	4	12.99	6.299	6.299	fig|1428.368.peg.5961	fig|1428.368.peg.5961	2
1069	4.46	4.46	24.19	18.6	18.6	fig|11428.3.peg.5280	fig|11428.3.peg.5280	4
1070	4.45	4.45	15.67	11.06	7.834	fig|11428.3.peg.3408	fig|11428.3.peg.3408	2
1071	4.44	4.44	45.83	18.75	18.75	fig|1428.368.peg.6320	fig|1428.368.peg.6320	3
1071	0	4.44	45.83	18.75	18.75	fig|11428.3.peg.1968	fig|11428.3.peg.1968	3
1072	4.42	6.65	41.18	41.18	34.31	fig|1428.368.peg.3130	fig|1428.368.peg.3130	4
1073	4.42	4.42	15.38	12.43	9.467	fig|11428.3.peg.862	fig|11428.3.peg.862	3
1074	4.41	4.41	31.2	14	7.6	fig|11428.3.peg.5286	fig|11428.3.peg.5286	2
1074	0	2.33	20	10.8	4.4	fig|1428.368.peg.640	fig|1428.368.peg.640	1
1075	4.4	6.83	15.28	8.293	6.179	fig|11428.3.peg.400	fig|11428.3.peg.400	4
1076	4.4	4.4	37.95	24.1	12.05	fig|11428.3.peg.5932	fig|11428.3.peg.5932	2
1077	4.35	4.35	15.08	9.548	6.784	fig|11428.3.peg.1105	fig|11428.3.peg.1105	2
1078	4.32	4.44	18.88	18.88	12.24	fig|11428.3.peg.4549	fig|11428.3.peg.4549	2
1079	4.32	4.32	5.862	2.303	2.303	fig|1428.368.peg.3907	fig|1428.368.peg.3907	3
1079	0	4.3	6.56	2.303	2.303	fig|11428.3.peg.3204	fig|11428.3.peg.3204	3
1080	4.32	4.32	40.26	38.96	29.87	fig|11428.3.peg.4392	fig|11428.3.peg.4392	3
1081	4.31	4.31	38.56	26.8	12.42	fig|1428.368.peg.6165	fig|1428.368.peg.6165	2
1081	0	4.31	38.56	26.8	12.42	fig|11428.3.peg.5926	fig|11428.3.peg.5926	2
1082	4.3	4.3	39.29	20.71	13.57	fig|1428.368.peg.6327	fig|1428.368.peg.6327	2
1082	0	4.3	39.29	20.71	13.57	fig|11428.3.peg.1961	fig|11428.3.peg.1961	2
1083	4.27	58.99	66.12	65.22	62.68	fig|11428.3.peg.1862	fig|11428.3.peg.1862	38
1084	4.27	42.71	46.35	44	44	fig|1428.368.peg.4867	fig|1428.368.peg.4867	26
1085	4.27	4.27	23.11	8.503	4.806	fig|11428.3.peg.923	fig|11428.3.peg.923	2
1085	0	4.02	17.56	4.806	4.806	fig|1428.368.peg.4705	fig|1428.368.peg.4705	2
1086	4.27	4.27	40.45	19.55	15	fig|1428.368.peg.2932	fig|1428.368.peg.2932	3
1086	0	2.55	35.91	15	10.45	fig|11428.3.peg.4639	fig|11428.3.peg.4639	2
1087	4.25	32.74	68.91	62.82	54.81	fig|11428.3.peg.4484	fig|11428.3.peg.4484	18
1088	4.25	4.25	19.33	10.12	7.669	fig|11428.3.peg.943	fig|11428.3.peg.943	2
1088	0	2.2	20.86	6.442	3.988	fig|1428.368.peg.4725	fig|1428.368.peg.4725	1
1089	4.25	4.25	27.72	22.28	12.38	fig|11428.3.peg.1854	fig|11428.3.peg.1854	2
1090	4.22	18.87	35.18	29.64	27.42	fig|1428.368.peg.3882	fig|1428.368.peg.3882	9
1091	4.22	4.22	11.79	2.222	1.256	fig|11428.3.peg.3279	fig|11428.3.peg.3279	2
1092	4.22	4.22	20.54	8.352	5.643	fig|11428.3.peg.257	fig|11428.3.peg.257	2
1093	4.21	10.69	23.84	22.91	20.12	fig|1428.368.peg.2051	fig|1428.368.peg.2051	6
1094	4.21	4.21	9.893	5.023	5.023	fig|11428.3.peg.4390	fig|11428.3.peg.4390	3
1094	0	2.29	11.42	3.349	3.349	fig|1428.368.peg.4242	fig|1428.368.peg.4242	2
1095	4.21	4.21	13.47	9.713	9.713	fig|11428.3.peg.2935	fig|11428.3.peg.2935	3
1095	0	4.21	11.7	9.713	9.713	fig|1428.368.peg.2059	fig|1428.368.peg.2059	3
1096	4.21	4.21	20.61	17.54	11.4	fig|11428.3.peg.2013	fig|11428.3.peg.2013	2
1097	4.2	31.84	22.8	13.53	12.18	fig|1428.368.peg.1409	fig|1428.368.peg.1409	17
1098	4.2	4.2	21.31	9.943	7.67	fig|11428.3.peg.3936	fig|11428.3.peg.3936	2
1099	4.17	4.17	15.56	15.56	9.728	fig|11428.3.peg.4757	fig|11428.3.peg.4757	2
1100	4.15	4.15	13.4	9.2	7.4	fig|1428.368.peg.2158	fig|1428.368.peg.2158	3
1100	0	4.15	13.4	9.2	7.4	fig|11428.3.peg.530	fig|11428.3.peg.530	3
1101	4.15	4.15	28.81	14.4	7.407	fig|1428.368.peg.4972	fig|1428.368.peg.4972	2
1102	4.15	4.15	26.51	21.29	18.07	fig|1428.368.peg.3886	fig|1428.368.peg.3886	3
1102	0	4.02	18.07	18.07	18.07	fig|11428.3.peg.3225	fig|11428.3.peg.3225	3
1103	4.14	16.36	19.88	17.76	15.25	fig|11428.3.peg.541	fig|11428.3.peg.541	8
1104	4.14	4.17	27.35	18.39	12.56	fig|11428.3.peg.3497	fig|11428.3.peg.3497	3
1104	0	2.01	19.73	10.76	4.933	fig|1428.368.peg.2825	fig|1428.368.peg.2825	1
1105	4.14	4.14	9.101	3.319	2.677	fig|11428.3.peg.2991	fig|11428.3.peg.2991	2
1106	4.12	4.12	22.67	19.84	15.38	fig|1428.368.peg.5738	fig|1428.368.peg.5738	3
1106	0	3.21	37.25	17.41	12.96	fig|11428.3.peg.5704	fig|11428.3.peg.5704	2
1107	4.11	4.11	17.46	17.46	11.64	fig|1428.368.peg.6260	fig|1428.368.peg.6260	2
1108	4.1	4.1	9.544	7.977	3.704	fig|1428.368.peg.5965	fig|1428.368.peg.5965	2
1109	4.1	4.1	65.38	36.54	21.15	fig|11428.3.peg.1784	fig|11428.3.peg.1784	2
1109	0	2.08	53.85	25	9.615	fig|1428.368.peg.5157	fig|1428.368.peg.5157	1
1110	4.09	4.09	9.599	3.84	2.003	fig|1428.368.peg.2007	fig|1428.368.peg.2007	2
1111	4.09	4.09	39.44	26.76	16.2	fig|1428.368.peg.1416	fig|1428.368.peg.1416	2
1111	0	4.09	41.55	26.76	16.2	fig|11428.3.peg.4143	fig|11428.3.peg.4143	2
1112	4.09	4.09	29.61	23.61	17.6	fig|11428.3.peg.3052	fig|11428.3.peg.3052	3
1113	4.08	4.08	24.3	16.36	12.62	fig|1428.368.peg.6078	fig|1428.368.peg.6078	2
1113	0	4.08	16.36	16.36	12.62	fig|11428.3.peg.120	fig|11428.3.peg.120	2
1114	4.07	4.07	16.25	13.36	13.36	fig|11428.3.peg.4721	fig|11428.3.peg.4721	3
1115	4.06	4.97	23.61	15.97	15.97	fig|1428.368.peg.622	fig|1428.368.peg.622	3
1115	0	4.97	28.47	15.97	15.97	fig|11428.3.peg.195	fig|11428.3.peg.195	3
1116	4.06	4.06	13.06	5.573	3.662	fig|11428.3.peg.3661	fig|11428.3.peg.3661	2
1117	4.06	4.06	39.79	15.71	11.52	fig|11428.3.peg.1622	fig|11428.3.peg.1622	2
1117	0	4.06	29.84	15.71	11.52	fig|1428.368.peg.1666	fig|1428.368.peg.1666	2
1118	4.06	4.06	42.34	27.01	20.44	fig|1428.368.peg.1678	fig|1428.368.peg.1678	2
1118	0	4.02	59.12	20.44	20.44	fig|11428.3.peg.1609	fig|11428.3.peg.1609	2
1119	4.06	4.06	26.35	23.65	18.24	fig|11428.3.peg.5230	fig|11428.3.peg.5230	2
1120	4.05	4.05	26.36	15	11.82	fig|1428.368.peg.1144	fig|1428.368.peg.1144	2
1121	4.04	10.34	26.09	17.17	15.87	fig|11428.3.peg.2763	fig|11428.3.peg.2763	6
1122	4.04	4.04	14.1	6.706	6.706	fig|11428.3.peg.207	fig|11428.3.peg.207	5
1123	4.04	4.04	25.77	18.85	10.38	fig|1428.368.peg.4295	fig|1428.368.peg.4295	3
1123	0	3.9	25.77	18.85	10.38	fig|11428.3.peg.4193	fig|11428.3.peg.4193	3
1124	4.04	4.04	13.01	5.272	5.272	fig|11428.3.peg.3146	fig|11428.3.peg.3146	2
1124	0	2.03	10.54	2.812	2.812	fig|1428.368.peg.3964	fig|1428.368.peg.3964	1
1125	4.03	4.03	11.18	3.342	3.342	fig|11428.3.peg.3261	fig|11428.3.peg.3261	2
1125	0	4.03	9.266	3.346	3.346	fig|1428.368.peg.6389	fig|1428.368.peg.6389	2
1126	4.03	4.03	23.17	14.29	14.29	fig|1428.368.peg.2775	fig|1428.368.peg.2775	4
1127	4.03	4.03	14.36	6.117	6.117	fig|1428.368.peg.2716	fig|1428.368.peg.2716	2
1127	0	4.02	12.77	6.117	6.117	fig|11428.3.peg.3390	fig|11428.3.peg.3390	2
1128	4.03	4.03	16.54	9.449	6.824	fig|1428.368.peg.5119	fig|1428.368.peg.5119	2
1129	4.03	4.03	25.75	11.98	11.98	fig|11428.3.peg.5977	fig|11428.3.peg.5977	2
1130	4.03	4.03	26.86	13.71	13.71	fig|11428.3.peg.5068	fig|11428.3.peg.5068	2
1130	0	4.02	22.29	13.71	13.71	fig|1428.368.peg.5643	fig|1428.368.peg.5643	2
1131	4.03	4.03	6.632	2.618	2.618	fig|11428.3.peg.235	fig|11428.3.peg.235	3
1132	4.03	4.03	19.79	11.46	11.46	fig|11428.3.peg.2287	fig|11428.3.peg.2287	2
1133	4.03	4.03	9.227	5.237	5.237	fig|1428.368.peg.2418	fig|1428.368.peg.2418	2
1133	0	4.03	9.227	5.237	5.237	fig|11428.3.peg.5663	fig|11428.3.peg.5663	2
1134	4.03	4.03	12.09	6.045	6.045	fig|11428.3.peg.5209	fig|11428.3.peg.5209	2
1135	4.02	4.02	17.7	6.667	6.667	fig|1428.368.peg.1332	fig|1428.368.peg.1332	2
1135	0	2.01	19.86	4.452	4.452	fig|11428.3.peg.5434	fig|11428.3.peg.5434	1
1136	4.02	4.02	31.9	19.02	19.02	fig|1428.368.peg.6173	fig|1428.368.peg.6173	2
1136	0	4.02	31.9	19.02	19.02	fig|11428.3.peg.5935	fig|11428.3.peg.5935	2
1137	4.02	4.02	10.43	6.635	4.976	fig|1428.368.peg.4863	fig|1428.368.peg.4863	2
1138	4.02	4.02	15.24	10.16	10.16	fig|11428.3.peg.1524	fig|11428.3.peg.1524	2
1138	0	4.02	12.34	10.13	10.13	fig|1428.368.peg.4414	fig|1428.368.peg.4414	2
1139	4.01	18.24	30.07	30.07	27.63	fig|11428.3.peg.4905	fig|11428.3.peg.4905	11
1140	4.01	8.11	21.22	10.13	7.075	fig|1428.368.peg.6098	fig|1428.368.peg.6098	4
1141	4.01	5.68	29.86	18.55	13.62	fig|11428.3.peg.1501	fig|11428.3.peg.1501	3
1142	4.01	4.01	45.83	19.17	19.17	fig|1428.368.peg.6294	fig|1428.368.peg.6294	2
1142	0	4.01	45.83	19.17	19.17	fig|11428.3.peg.1994	fig|11428.3.peg.1994	2
1143	4.01	4.01	40.94	16.11	16.11	fig|1428.368.peg.2919	fig|1428.368.peg.2919	3
1143	0	4.01	40.94	16.11	16.11	fig|11428.3.peg.4652	fig|11428.3.peg.4652	3
1144	4.01	4.01	20.62	7.56	7.56	fig|11428.3.peg.3148	fig|11428.3.peg.3148	2
1145	4.01	4.01	18.06	11.94	11.94	fig|11428.3.peg.2470	fig|11428.3.peg.2470	3
1145	0	4.01	13.55	7.419	7.419	fig|1428.368.peg.1726	fig|1428.368.peg.1726	2
1146	4.01	4.01	11.42	6.034	6.034	fig|11428.3.peg.851	fig|11428.3.peg.851	2
1147	4.01	4.01	34.87	12.5	12.5	fig|11428.3.peg.5829	fig|11428.3.peg.5829	2
1147	0	4.01	17.11	12.5	12.5	fig|1428.368.peg.6118	fig|1428.368.peg.6118	2
1148	4.01	4.01	25	20.14	20.14	fig|1428.368.peg.6315	fig|1428.368.peg.6315	2
1148	0	4.01	25	20.14	20.14	fig|11428.3.peg.1973	fig|11428.3.peg.1973	2
1149	4.01	4.01	12.3	10.03	8.091	fig|11428.3.peg.4423	fig|11428.3.peg.4423	2
1150	4.01	4.01	13.9	7.458	7.458	fig|11428.3.peg.3593	fig|11428.3.peg.3593	2
1151	4.01	4.01	9.554	6.688	6.688	fig|1428.368.peg.5437	fig|1428.368.peg.5437	2
1151	0	4.01	9.231	6.462	6.462	fig|11428.3.peg.435	fig|11428.3.peg.435	2
1151	0	4	12.42	6.688	6.688	fig|11428.3.peg.4261	fig|11428.3.peg.4261	2
1151	0	4	8.599	6.688	6.688	fig|1428.368.peg.5865	fig|1428.368.peg.5865	2
1152	4.01	4.01	10.68	7.443	7.443	fig|1428.368.peg.4924	fig|1428.368.peg.4924	2
1152	0	4.01	10.68	7.443	7.443	fig|11428.3.peg.2044	fig|11428.3.peg.2044	2
1153	4	134.59	90.26	88.79	88.79	fig|1428.368.peg.6364	fig|1428.368.peg.6364	115
1154	4	82.93	60.25	54.08	54.08	fig|1428.368.peg.4923	fig|1428.368.peg.4923	53
1155	4	77.96	71.1	61.82	58.67	fig|1428.368.peg.1690	fig|1428.368.peg.1690	54
1156	4	55.46	57.29	54.41	50.31	fig|1428.368.peg.1216	fig|1428.368.peg.1216	34
1157	4	42.56	48.21	44.1	42.74	fig|1428.368.peg.6145	fig|1428.368.peg.6145	24
1158	4	40.03	62.73	60.37	58.79	fig|1428.368.peg.6253	fig|1428.368.peg.6253	23
1159	4	39.3	46.76	39.03	34.35	fig|1428.368.peg.3887	fig|1428.368.peg.3887	21
1160	4	37.37	48.52	47.29	40.15	fig|1428.368.peg.3572	fig|1428.368.peg.3572	20
1161	4	34.52	76.52	66.4	66.4	fig|1428.368.peg.3414	fig|1428.368.peg.3414	25
1162	4	33.29	61.61	61.61	61.61	fig|1428.368.peg.3413	fig|1428.368.peg.3413	19
1163	4	33.12	48.36	46.73	46.73	fig|1428.368.peg.3877	fig|1428.368.peg.3877	20
1164	4	32.49	41.44	37.32	34.85	fig|1428.368.peg.6345	fig|1428.368.peg.6345	17
1165	4	32.07	45.38	38.9	34.18	fig|1428.368.peg.5534	fig|1428.368.peg.5534	18
1166	4	31.99	41.95	35.15	33.79	fig|1428.368.peg.391	fig|1428.368.peg.391	16
1167	4	30.68	35.57	27.99	25.95	fig|1428.368.peg.3902	fig|1428.368.peg.3902	15
1168	4	30.34	42.73	40.04	40.04	fig|1428.368.peg.2589	fig|1428.368.peg.2589	16
1169	4	27.04	62.53	53.64	47.44	fig|11428.3.peg.137	fig|11428.3.peg.137	20
1170	4	19.87	29.7	29.7	27.72	fig|1428.368.peg.4699	fig|1428.368.peg.4699	13
1171	4	18.29	61.54	53.85	50	fig|11428.3.peg.1962	fig|11428.3.peg.1962	12
1172	4	18.24	38.19	31.74	30.07	fig|1428.368.peg.5003	fig|1428.368.peg.5003	10
1173	4	17.32	66.39	66.39	66.39	fig|1428.368.peg.6332	fig|1428.368.peg.6332	10
1174	4	17.14	31.85	27.16	24.44	fig|1428.368.peg.5440	fig|1428.368.peg.5440	9
1175	4	16.2	31.9	19.35	19.35	fig|1428.368.peg.3945	fig|1428.368.peg.3945	8
1176	4	16	27.84	24.72	24.72	fig|11428.3.peg.1558	fig|11428.3.peg.1558	8
1177	4	15.45	62.71	55.08	49.15	fig|1428.368.peg.6238	fig|1428.368.peg.6238	12
1178	4	12.19	57.01	46.61	40.72	fig|1428.368.peg.5938	fig|1428.368.peg.5938	8
1179	4	12.07	54.12	39.18	39.18	fig|11428.3.peg.4219	fig|11428.3.peg.4219	6
1180	4	12.02	54.69	35.94	35.94	fig|1428.368.peg.4318	fig|1428.368.peg.4318	8
1181	4	10.04	56.33	48.73	37.97	fig|11428.3.peg.2660	fig|11428.3.peg.2660	12
1182	4	8.02	23.36	15.89	15.89	fig|1428.368.peg.3826	fig|1428.368.peg.3826	5
1183	4	7.59	44.57	31.52	26.63	fig|1428.368.peg.2710	fig|1428.368.peg.2710	4
1184	4	6	16.76	11.81	9.066	fig|11428.3.peg.651	fig|11428.3.peg.651	4
1185	4	5.26	12.27	12.27	12.27	fig|1428.368.peg.2882	fig|1428.368.peg.2882	4
1186	4	4.11	46.97	43.94	34.85	fig|1428.368.peg.6314	fig|1428.368.peg.6314	2
1186	0	4.11	46.97	43.94	34.85	fig|11428.3.peg.1974	fig|11428.3.peg.1974	2
1187	4	4	32.54	18.93	18.93	fig|1428.368.peg.5072	fig|1428.368.peg.5072	2
1187	0	4	32.54	18.93	18.93	fig|11428.3.peg.847	fig|11428.3.peg.847	2
1188	4	4	33.91	10.43	10.43	fig|11428.3.peg.4479	fig|11428.3.peg.4479	2
1189	4	4	33.33	8.935	8.935	fig|1428.368.peg.3139	fig|1428.368.peg.3139	3
1189	0	4	25.43	8.935	8.935	fig|11428.3.peg.5735	fig|11428.3.peg.5735	3
1190	4	4	44.92	17.8	17.8	fig|11428.3.peg.3945	fig|11428.3.peg.3945	2
1191	4	4	31.87	16.48	12.64	fig|11428.3.peg.1936	fig|11428.3.peg.1936	2
1192	4	4	34.08	16.2	16.2	fig|1428.368.peg.5448	fig|1428.368.peg.5448	2
1193	4	4	31.82	14.55	14.55	fig|11428.3.peg.4779	fig|11428.3.peg.4779	2
1194	4	4	12.13	5.693	5.693	fig|11428.3.peg.2520	fig|11428.3.peg.2520	2
1194	0	2	10.89	2.97	2.97	fig|1428.368.peg.3719	fig|1428.368.peg.3719	1
1195	4	4	67.65	44.12	36.76	fig|1428.368.peg.4136	fig|1428.368.peg.4136	2
1195	0	4	67.65	44.12	36.76	fig|11428.3.peg.3724	fig|11428.3.peg.3724	2
1196	4	4	12.46	4.249	4.249	fig|1428.368.peg.3296	fig|1428.368.peg.3296	2
1197	4	4	25.86	20.69	20.69	fig|1428.368.peg.2817	fig|1428.368.peg.2817	3
1198	4	4	12.88	10.12	10.12	fig|11428.3.peg.3831	fig|11428.3.peg.3831	2
1199	4	4	17.65	11.76	11.76	fig|11428.3.peg.1945	fig|11428.3.peg.1945	2
1199	0	4	14.93	11.76	11.76	fig|1428.368.peg.6344	fig|1428.368.peg.6344	2
1200	4	4	16.41	8.779	8.779	fig|11428.3.peg.1803	fig|11428.3.peg.1803	2
1200	0	2	13.36	4.198	4.198	fig|1428.368.peg.5177	fig|1428.368.peg.5177	1
1201	4	4	10.82	5.96	5.96	fig|11428.3.peg.1295	fig|11428.3.peg.1295	2
1202	4	4	20.09	20.09	17.29	fig|1428.368.peg.605	fig|1428.368.peg.605	2
1203	4	4	48.98	36.73	36.73	fig|1428.368.peg.5173	fig|1428.368.peg.5173	2
1203	0	4	48.98	36.73	36.73	fig|11428.3.peg.1799	fig|11428.3.peg.1799	2
1203	0	4	36.73	36.73	36.73	fig|1428.368.peg.5249	fig|1428.368.peg.5249	2
1203	0	4	36.73	36.73	36.73	fig|11428.3.peg.1416	fig|11428.3.peg.1416	2
1204	4	4	11.01	11.01	11.01	fig|1428.368.peg.4637	fig|1428.368.peg.4637	2
1204	0	2	54.05	35.14	35.14	fig|11428.3.peg.4941	fig|11428.3.peg.4941	1
1205	4	4	13.73	8.627	8.627	fig|1428.368.peg.4258	fig|1428.368.peg.4258	4
1205	0	4	8.627	8.627	8.627	fig|11428.3.peg.4406	fig|11428.3.peg.4406	4
1206	4	4	8.815	6.991	6.991	fig|1428.368.peg.3852	fig|1428.368.peg.3852	2
1207	4	4	17.49	12.57	12.57	fig|1428.368.peg.2836	fig|1428.368.peg.2836	2
1207	0	2	9.836	4.918	4.918	fig|11428.3.peg.3509	fig|11428.3.peg.3509	1
1208	4	4	37.93	26.44	26.44	fig|1428.368.peg.2790	fig|1428.368.peg.2790	2
1208	0	4	37.93	26.44	26.44	fig|11428.3.peg.3464	fig|11428.3.peg.3464	2
1209	4	4	40	23.08	23.08	fig|11428.3.peg.5851	fig|11428.3.peg.5851	2
1210	4	4	21.43	15.48	15.48	fig|11428.3.peg.39	fig|11428.3.peg.39	2
1211	4	4	13.11	10.25	10.25	fig|11428.3.peg.3302	fig|11428.3.peg.3302	2
1211	0	4	10.25	10.25	10.25	fig|1428.368.peg.4840	fig|1428.368.peg.4840	2
1212	4	4	24.76	24.76	24.76	fig|11428.3.peg.2113	fig|11428.3.peg.2113	2
1213	4	4	37.86	33.57	33.57	fig|11428.3.peg.1649	fig|11428.3.peg.1649	2
1214	4	4	38.81	38.81	38.81	fig|1428.368.peg.846	fig|1428.368.peg.846	2
1214	0	4	38.81	38.81	38.81	fig|11428.3.peg.246	fig|11428.3.peg.246	2
1215	4	4	16.5	16.5	16.5	fig|1428.368.peg.6044	fig|1428.368.peg.6044	2
1215	0	4	16.5	16.5	16.5	fig|11428.3.peg.3951	fig|11428.3.peg.3951	2
1216	4	4	25	25	25	fig|1428.368.peg.5192	fig|1428.368.peg.5192	6
1216	0	4	25	25	25	fig|11428.3.peg.1817	fig|11428.3.peg.1817	6
1217	4	4	20.35	20.35	20.35	fig|1428.368.peg.4758	fig|1428.368.peg.4758	3
1217	0	4	20.35	20.35	20.35	fig|11428.3.peg.977	fig|11428.3.peg.977	3
1218	4	4	6.607	6.607	6.607	fig|1428.368.peg.4152	fig|1428.368.peg.4152	2
1218	0	4	6.607	6.607	6.607	fig|11428.3.peg.3708	fig|11428.3.peg.3708	2
1219	4	4	50.67	50.67	50.67	fig|1428.368.peg.3819	fig|1428.368.peg.3819	2
1219	0	4	51.35	51.35	51.35	fig|11428.3.peg.2126	fig|11428.3.peg.2126	2
1220	4	4	23.33	23.33	23.33	fig|1428.368.peg.3145	fig|1428.368.peg.3145	2
1220	0	2	10.83	10.83	10.83	fig|11428.3.peg.5729	fig|11428.3.peg.5729	1
1221	4	4	10.87	10.87	10.87	fig|1428.368.peg.2697	fig|1428.368.peg.2697	2
1221	0	2	4.348	4.348	4.348	fig|11428.3.peg.3372	fig|11428.3.peg.3372	1
1222	4	4	48.12	48.12	48.12	fig|1428.368.peg.2105	fig|1428.368.peg.2105	2
1223	4	4	29.84	29.84	29.84	fig|11428.3.peg.839	fig|11428.3.peg.839	2
1223	0	2	23.39	17.74	17.74	fig|1428.368.peg.5079	fig|1428.368.peg.5079	1
1224	4	4	26.49	26.49	26.49	fig|11428.3.peg.644	fig|11428.3.peg.644	3
1224	0	2	14.36	8.205	8.205	fig|1428.368.peg.345	fig|1428.368.peg.345	2
1225	4	4	14.8	14.8	14.8	fig|11428.3.peg.56	fig|11428.3.peg.56	2
1226	4	4	18.97	18.97	18.97	fig|11428.3.peg.4780	fig|11428.3.peg.4780	2
1227	4	4	52	52	52	fig|11428.3.peg.2916	fig|11428.3.peg.2916	2
1227	0	2	16	16	16	fig|1428.368.peg.2085	fig|1428.368.peg.2085	1
1228	4	4	22.32	22.32	22.32	fig|11428.3.peg.1590	fig|11428.3.peg.1590	2
1228	0	2	16.22	16.22	16.22	fig|1428.368.peg.1695	fig|1428.368.peg.1695	1
1229	3.96	4	15.65	15.65	15.65	fig|1428.368.peg.1736	fig|1428.368.peg.1736	2
1229	0	1.8	6.803	6.803	6.803	fig|11428.3.peg.2460	fig|11428.3.peg.2460	1
1230	3.92	6.4	53.44	39.69	39.69	fig|1428.368.peg.317	fig|1428.368.peg.317	5
1231	3.91	3.91	27.57	19.46	11.89	fig|1428.368.peg.6386	fig|1428.368.peg.6386	2
1231	0	3.91	27.57	19.46	11.89	fig|11428.3.peg.3265	fig|11428.3.peg.3265	2
1232	3.9	3.9	12.83	4.742	3.487	fig|11428.3.peg.5277	fig|11428.3.peg.5277	2
1232	0	2.1	10.79	3.181	1.936	fig|1428.368.peg.648	fig|1428.368.peg.648	1
1233	3.9	3.9	22.29	9.907	7.121	fig|11428.3.peg.3213	fig|11428.3.peg.3213	2
1234	3.9	3.9	13.97	10.16	7.937	fig|11428.3.peg.488	fig|11428.3.peg.488	3
1235	3.88	3.88	21.29	21.29	16.13	fig|1428.368.peg.5742	fig|1428.368.peg.5742	2
1235	0	3.88	21.29	21.29	16.13	fig|11428.3.peg.5700	fig|11428.3.peg.5700	2
1236	3.87	3.87	38.51	18.92	13.51	fig|11428.3.peg.4389	fig|11428.3.peg.4389	2
1236	0	1.63	31.76	12.16	6.757	fig|1428.368.peg.4241	fig|1428.368.peg.4241	1
1237	3.87	3.87	6.876	2.75	2.75	fig|1428.368.peg.2696	fig|1428.368.peg.2696	2
1237	0	3.85	5.918	2.857	2.857	fig|11428.3.peg.3371	fig|11428.3.peg.3371	2
1238	3.87	3.87	37.21	23.26	23.26	fig|11428.3.peg.915	fig|11428.3.peg.915	3
1239	3.87	3.87	13.5	8.54	6.336	fig|11428.3.peg.816	fig|11428.3.peg.816	2
1240	3.86	14.03	21.44	12.69	12.69	fig|1428.368.peg.3083	fig|1428.368.peg.3083	7
1240	0	2.01	48.6	22.43	22.43	fig|11428.3.peg.3928	fig|11428.3.peg.3928	1
1241	3.86	3.86	18.75	7.589	7.589	fig|1428.368.peg.3990	fig|1428.368.peg.3990	2
1241	0	3.86	11.61	7.589	7.589	fig|11428.3.peg.3122	fig|11428.3.peg.3122	2
1242	3.86	3.86	15.59	8.475	8.475	fig|1428.368.peg.1547	fig|1428.368.peg.1547	2
1242	0	3.86	10.51	8.475	8.475	fig|11428.3.peg.4822	fig|11428.3.peg.4822	2
1243	3.85	3.85	22.78	6.213	6.213	fig|1428.368.peg.4925	fig|1428.368.peg.4925	2
1243	0	3.85	22.78	6.213	6.213	fig|11428.3.peg.2043	fig|11428.3.peg.2043	2
1244	3.85	3.85	20	13.53	13.53	fig|11428.3.peg.4009	fig|11428.3.peg.4009	2
1244	0	3.85	13.53	13.53	13.53	fig|1428.368.peg.5984	fig|1428.368.peg.5984	2
1245	3.84	3.84	19.87	9.287	7.775	fig|1428.368.peg.1096	fig|1428.368.peg.1096	3
1245	0.01	2.42	18.79	7.127	5.616	fig|11428.3.peg.2696	fig|11428.3.peg.2696	2
1246	3.84	3.84	22.67	22.67	22.67	fig|11428.3.peg.1848	fig|11428.3.peg.1848	4
1246	0	1.56	20.67	10.67	10.67	fig|1428.368.peg.1643	fig|1428.368.peg.1643	2
1247	3.81	10.39	14.92	12.39	9.664	fig|11428.3.peg.2594	fig|11428.3.peg.2594	5
1248	3.81	3.81	12.84	12.84	12.84	fig|11428.3.peg.4425	fig|11428.3.peg.4425	3
1249	3.77	3.77	19.17	19.17	19.17	fig|1428.368.peg.3946	fig|1428.368.peg.3946	2
1249	0	3.77	19.17	19.17	19.17	fig|11428.3.peg.3164	fig|11428.3.peg.3164	2
1250	3.75	3.75	8.185	5.804	4.018	fig|11428.3.peg.2753	fig|11428.3.peg.2753	2
1250	0	3.7	4.992	4.085	4.085	fig|1428.368.peg.1019	fig|1428.368.peg.1019	2
1251	3.68	3.68	10.5	10.5	10.5	fig|11428.3.peg.4994	fig|11428.3.peg.4994	3
1252	3.66	3.66	15.41	8.197	8.197	fig|1428.368.peg.5628	fig|1428.368.peg.5628	2
1252	0	3.66	14.43	8.197	8.197	fig|11428.3.peg.5053	fig|11428.3.peg.5053	2
1253	3.65	3.65	13.46	8.392	5.594	fig|11428.3.peg.4712	fig|11428.3.peg.4712	2
1253	0	2.12	10.66	6.469	3.671	fig|1428.368.peg.5303	fig|1428.368.peg.5303	1
1254	3.62	3.62	27.23	16.9	13.62	fig|11428.3.peg.1718	fig|11428.3.peg.1718	2
1254	0	1.43	16.74	10.23	6.977	fig|1428.368.peg.5088	fig|1428.368.peg.5088	1
1255	3.61	16.6	28.21	17.95	14.29	fig|1428.368.peg.5316	fig|1428.368.peg.5316	9
1255	0	16.56	30.77	17.95	14.29	fig|11428.3.peg.4719	fig|11428.3.peg.4719	9
1256	3.6	3.6	44.66	18.45	18.45	fig|1428.368.peg.3056	fig|1428.368.peg.3056	3
1256	0	3.6	44.66	18.45	18.45	fig|11428.3.peg.6083	fig|11428.3.peg.6083	3
1256	0	2	16.9	16.9	16.9	fig|11428.3.peg.5421	fig|11428.3.peg.5421	2
1256	0	1.86	31.07	18.45	18.45	fig|11428.3.peg.3839	fig|11428.3.peg.3839	2
1257	3.59	3.59	30.67	23.93	15.34	fig|1428.368.peg.4897	fig|1428.368.peg.4897	2
1257	0	3.59	30.67	23.93	15.34	fig|11428.3.peg.2065	fig|11428.3.peg.2065	2
1258	3.59	3.59	15.1	5.098	5.098	fig|11428.3.peg.3305	fig|11428.3.peg.3305	2
1258	0	2.02	13.53	2.745	2.745	fig|1428.368.peg.4843	fig|1428.368.peg.4843	1
1259	3.59	3.59	12.7	9.524	9.524	fig|1428.368.peg.2815	fig|1428.368.peg.2815	2
1259	0	3.59	12.7	9.524	9.524	fig|11428.3.peg.3488	fig|11428.3.peg.3488	2
1260	3.58	3.58	19.53	6.734	6.734	fig|11428.3.peg.1557	fig|11428.3.peg.1557	2
1260	0	1.55	9.31	2.759	2.759	fig|1428.368.peg.4445	fig|1428.368.peg.4445	1
1261	3.58	3.58	31.97	25.85	25.85	fig|11428.3.peg.1912	fig|11428.3.peg.1912	3
1262	3.58	3.58	17.22	17.22	13.25	fig|11428.3.peg.3361	fig|11428.3.peg.3361	2
1263	3.55	3.55	24.26	10.89	10.89	fig|1428.368.peg.4515	fig|1428.368.peg.4515	2
1263	0	3.55	24.26	10.89	10.89	fig|11428.3.peg.5250	fig|11428.3.peg.5250	2
1264	3.55	3.55	14.1	13.46	13.46	fig|1428.368.peg.298	fig|1428.368.peg.298	2
1265	3.54	20.16	52.89	52.89	52.89	fig|11428.3.peg.1991	fig|11428.3.peg.1991	11
1265	0.01	1.39	11.57	5.785	5.785	RRRRRfig|11428.3.peg.1991REVERSED		1
1265	0	1.37	3.993	1.27	1.27	fig|1428.368.peg.5779	fig|1428.368.peg.5779	1
1265	0	1.37	2.359	1.27	1.27	fig|11428.3.peg.2252	fig|11428.3.peg.2252	1
1266	3.54	3.54	14.61	7.809	5.793	fig|1428.368.peg.6105	fig|1428.368.peg.6105	2
1266	0	3.54	14.61	7.809	5.793	fig|11428.3.peg.5842	fig|11428.3.peg.5842	2
1267	3.53	3.53	21.65	12.5	7.622	fig|11428.3.peg.1504	fig|11428.3.peg.1504	2
1267	0	2	14.87	5.063	5.063	fig|1428.368.peg.4393	fig|1428.368.peg.4393	1
1268	3.52	3.52	24.27	13.81	10.46	fig|11428.3.peg.858	fig|11428.3.peg.858	2
1268	0	3.52	17.15	13.81	10.46	fig|1428.368.peg.5060	fig|1428.368.peg.5060	2
1269	3.52	3.52	8.99	2.442	2.442	fig|11428.3.peg.4683	fig|11428.3.peg.4683	2
1270	3.51	3.51	17.23	11.58	8.757	fig|1428.368.peg.325	fig|1428.368.peg.325	2
1270	0	3.51	17.23	11.58	8.757	fig|11428.3.peg.339	fig|11428.3.peg.339	2
1271	3.47	3.47	29.62	17.89	7.625	fig|11428.3.peg.5075	fig|11428.3.peg.5075	2
1271	0	3.47	23.75	17.89	7.625	fig|1428.368.peg.5655	fig|1428.368.peg.5655	2
1272	3.47	3.47	21.61	16.58	13.07	fig|1428.368.peg.169	fig|1428.368.peg.169	2
1272	0	3.47	21.61	16.58	13.07	fig|11428.3.peg.3029	fig|11428.3.peg.3029	2
1273	3.47	3.47	12.2	6.775	6.775	fig|1428.368.peg.2543	fig|1428.368.peg.2543	2
1273	0	3.47	12.2	6.775	6.775	fig|11428.3.peg.2308	fig|11428.3.peg.2308	2
1274	3.47	3.47	9.409	5.914	5.914	fig|1428.368.peg.1381	fig|1428.368.peg.1381	2
1275	3.42	3.42	12.31	4.459	4.459	fig|1428.368.peg.6261	fig|1428.368.peg.6261	2
1276	3.42	3.42	13.4	8.311	8.311	fig|11428.3.peg.1393	fig|11428.3.peg.1393	2
1277	3.39	3.39	19.65	7.859	4.912	fig|1428.368.peg.3863	fig|1428.368.peg.3863	2
1277	0	3.39	19.84	7.859	4.912	fig|11428.3.peg.3249	fig|11428.3.peg.3249	2
1278	3.39	3.39	8.267	6.4	4.533	fig|1428.368.peg.5223	fig|1428.368.peg.5223	2
1278	0	3.39	8.267	6.4	4.533	fig|11428.3.peg.1390	fig|11428.3.peg.1390	2
1279	3.36	77.77	43.55	37.89	35.8	fig|1428.368.peg.2681	fig|1428.368.peg.2681	45
1280	3.34	3.34	48.19	39.9	28.5	fig|1428.368.peg.5358	fig|1428.368.peg.5358	3
1281	3.3	3.3	31.21	13.38	13.38	fig|11428.3.peg.5915	fig|11428.3.peg.5915	2
1281	0	1.59	17.83	6.369	6.369	fig|1428.368.peg.6153	fig|1428.368.peg.6153	1
1282	3.28	3.35	24.81	16.67	10	fig|11428.3.peg.3947	fig|11428.3.peg.3947	2
1283	3.28	3.28	21.79	11.97	8.974	fig|1428.368.peg.4144	fig|1428.368.peg.4144	3
1283	0	3.25	18.8	8.974	8.974	fig|11428.3.peg.3716	fig|11428.3.peg.3716	3
1284	3.28	3.28	12.53	8.174	6.54	fig|1428.368.peg.1323	fig|1428.368.peg.1323	2
1285	3.24	3.47	45.9	45.9	45.9	fig|1428.368.peg.3050	fig|1428.368.peg.3050	3
1285	0	3.47	45.9	45.9	45.9	fig|11428.3.peg.6076	fig|11428.3.peg.6076	3
1286	3.24	3.24	18.41	9.833	5.021	fig|11428.3.peg.2703	fig|11428.3.peg.2703	2
1287	3.24	3.24	6.211	6.211	4.037	fig|11428.3.peg.224	fig|11428.3.peg.224	2
1288	3.23	4.48	10.93	6.512	6.512	fig|11428.3.peg.3459	fig|11428.3.peg.3459	3
1288	0	2.42	10	3.953	3.953	fig|1428.368.peg.2785	fig|1428.368.peg.2785	2
1289	3.21	3.21	13.95	5.978	2.536	fig|11428.3.peg.3103	fig|11428.3.peg.3103	2
1289	0	2	4.399	1.76	1.76	fig|1428.368.peg.1572	fig|1428.368.peg.1572	1
1290	3.21	3.21	11.87	7.554	7.554	fig|11428.3.peg.988	fig|11428.3.peg.988	2
1290	0	2	8.273	3.957	3.957	fig|1428.368.peg.4769	fig|1428.368.peg.4769	1
1291	3.2	3.21	30	14.09	10	fig|11428.3.peg.885	fig|11428.3.peg.885	2
1291	0	2.02	24.09	8.182	4.091	fig|1428.368.peg.4666	fig|1428.368.peg.4666	1
1292	3.19	3.58	19.47	19.47	12.63	fig|1428.368.peg.3345	fig|1428.368.peg.3345	2
1293	3.16	3.16	15.67	8.295	6.221	fig|1428.368.peg.4143	fig|1428.368.peg.4143	2
1293	0	3.16	15.67	8.295	6.221	fig|11428.3.peg.3717	fig|11428.3.peg.3717	2
1294	3.15	3.15	21.13	14.93	7.887	fig|11428.3.peg.3046	fig|11428.3.peg.3046	2
1295	3.13	3.13	19.74	9.211	9.211	fig|1428.368.peg.2628	fig|1428.368.peg.2628	3
1296	3.12	3.12	8.194	3.911	3.911	fig|1428.368.peg.1650	fig|1428.368.peg.1650	2
1296	0	3.08	7.076	3.911	3.911	fig|11428.3.peg.1841	fig|11428.3.peg.1841	2
1297	3.11	22.67	39.02	33.59	25.58	fig|1428.368.peg.3804	fig|1428.368.peg.3804	12
1298	3.11	3.11	37.37	19.19	19.19	fig|1428.368.peg.2511	fig|1428.368.peg.2511	3
1299	3.1	3.1	18.98	13.89	13.89	fig|11428.3.peg.1446	fig|11428.3.peg.1446	2
1300	3.1	3.1	18.99	14.56	14.56	fig|1428.368.peg.4814	fig|1428.368.peg.4814	2
1300	0.01	2.02	18.35	8.228	8.228	fig|1428.368.peg.6377	fig|1428.368.peg.6377	1
1300	0.01	2.02	18.35	8.228	8.228	fig|11428.3.peg.3274	fig|11428.3.peg.3274	1
1300	0	3.1	18.99	14.56	14.56	fig|11428.3.peg.3283	fig|11428.3.peg.3283	2
1301	3.05	3.05	15.66	4.982	4.982	fig|11428.3.peg.2325	fig|11428.3.peg.2325	3
1301	0	2.49	12.63	3.737	3.737	fig|1428.368.peg.1206	fig|1428.368.peg.1206	2
1302	3.03	3.03	16.23	16.23	11.32	fig|11428.3.peg.141	fig|11428.3.peg.141	2
1303	3.02	3.02	28.57	17.53	13.64	fig|11428.3.peg.112	fig|11428.3.peg.112	2
1304	3.02	3.02	15.53	15.53	15.53	fig|1428.368.peg.4684	fig|1428.368.peg.4684	3
1304	0	3.02	15.53	15.53	15.53	fig|11428.3.peg.903	fig|11428.3.peg.903	3
1305	2.99	2.99	18.88	11.24	11.24	fig|11428.3.peg.3013	fig|11428.3.peg.3013	2
1305	0	2	10.44	6.426	6.426	fig|1428.368.peg.949	fig|1428.368.peg.949	1
1306	2.98	2.98	9.605	7.062	7.062	fig|11428.3.peg.3078	fig|11428.3.peg.3078	2
1306	0	2.98	7.353	7.353	7.353	fig|1428.368.peg.224	fig|1428.368.peg.224	2
1307	2.96	2.96	17.28	14.62	11.63	fig|11428.3.peg.4912	fig|11428.3.peg.4912	2
1307	0	2.12	17.61	6.645	3.654	fig|1428.368.peg.4608	fig|1428.368.peg.4608	1
1308	2.96	2.96	10	9.167	9.167	fig|11428.3.peg.5161	fig|11428.3.peg.5161	2
1309	2.96	2.96	13.36	13.36	9.717	fig|11428.3.peg.4778	fig|11428.3.peg.4778	2
1309	0	1.66	8.502	8.502	4.858	fig|1428.368.peg.1145	fig|1428.368.peg.1145	1
1310	2.96	2.96	12.24	12.24	12.24	fig|1428.368.peg.1213	fig|1428.368.peg.1213	2
1310	0	2.96	12.24	12.24	12.24	fig|11428.3.peg.2318	fig|11428.3.peg.2318	2
1311	2.94	2.94	10.1	6.01	6.01	fig|11428.3.peg.61	fig|11428.3.peg.61	3
1311	0	1.45	13.94	3.846	3.846	fig|1428.368.peg.912	fig|1428.368.peg.912	2
1312	2.92	2.92	22.97	14.83	10.05	fig|1428.368.peg.6360	fig|1428.368.peg.6360	2
1312	0	2.92	22.97	14.83	10.05	fig|11428.3.peg.2645	fig|11428.3.peg.2645	2
1313	2.91	20.69	39.84	31.25	25.26	fig|1428.368.peg.3571	fig|1428.368.peg.3571	10
1314	2.91	2.91	32.73	18.64	13.64	fig|11428.3.peg.1766	fig|11428.3.peg.1766	2
1315	2.91	2.91	0.8383	0.6188	0.4391	fig|1428.368.peg.981	fig|1428.368.peg.981	2
1316	2.9	108.87	81.5	75.14	68.06	fig|1428.368.peg.6325	fig|1428.368.peg.6325	74
1317	2.89	9.13	47.83	33.91	30	fig|1428.368.peg.6334	fig|1428.368.peg.6334	6
1318	2.89	7.72	25.67	15	15	fig|11428.3.peg.1507	fig|11428.3.peg.1507	5
1319	2.89	2.89	20.84	4.222	4.222	fig|11428.3.peg.1726	fig|11428.3.peg.1726	2
1319	0	2.89	15.57	4.222	4.222	fig|1428.368.peg.5096	fig|1428.368.peg.5096	2
1320	2.88	2.88	26.52	26.52	21.97	fig|11428.3.peg.814	fig|11428.3.peg.814	2
1321	2.87	11.21	19.95	17.1	15.54	fig|1428.368.peg.2997	fig|1428.368.peg.2997	6
1322	2.86	2.86	26.51	11.45	6.928	fig|11428.3.peg.5139	fig|11428.3.peg.5139	2
1323	2.84	2.84	10.09	6.916	6.916	fig|1428.368.peg.2159	fig|1428.368.peg.2159	2
1323	0	2.84	10.09	6.916	6.916	fig|11428.3.peg.529	fig|11428.3.peg.529	2
1324	2.83	2.83	31.4	21.49	14.05	fig|11428.3.peg.5069	fig|11428.3.peg.5069	2
1324	0	2.83	22.31	21.49	14.05	fig|1428.368.peg.5648	fig|1428.368.peg.5648	2
1325	2.81	16.89	26.16	23.38	23.38	fig|1428.368.peg.1410	fig|1428.368.peg.1410	9
1326	2.81	2.81	13.86	4.819	4.819	fig|11428.3.peg.4267	fig|11428.3.peg.4267	2
1326	0	2.8	13.24	5.042	5.042	fig|1428.368.peg.5871	fig|1428.368.peg.5871	2
1327	2.78	3.34	20.65	6.997	5.119	fig|11428.3.peg.3783	fig|11428.3.peg.3783	2
1327	0	2.56	16.21	4.437	2.56	fig|1428.368.peg.4070	fig|1428.368.peg.4070	1
1328	2.78	2.78	41.9	31.43	23.81	fig|1428.368.peg.4056	fig|1428.368.peg.4056	3
1328	0	2.78	41.9	31.43	23.81	fig|11428.3.peg.3798	fig|11428.3.peg.3798	3
1329	2.78	2.78	15.2	6.383	6.383	fig|11428.3.peg.3174	fig|11428.3.peg.3174	2
1329	0	2.77	13.68	6.383	6.383	fig|1428.368.peg.3936	fig|1428.368.peg.3936	2
1330	2.78	2.78	19.1	14.61	11.99	fig|1428.368.peg.6099	fig|1428.368.peg.6099	2
1330	0	2.78	19.1	14.61	11.99	fig|11428.3.peg.5847	fig|11428.3.peg.5847	2
1331	2.76	2.76	18.47	13.69	8.917	fig|1428.368.peg.5091	fig|1428.368.peg.5091	2
1331	0	2.34	14.33	8.917	4.14	fig|11428.3.peg.1721	fig|11428.3.peg.1721	1
1332	2.75	2.75	17.71	8.15	5.956	fig|1428.368.peg.4006	fig|1428.368.peg.4006	3
1332	0	2.75	17.4	8.15	5.956	fig|11428.3.peg.3107	fig|11428.3.peg.3107	3
1333	2.75	2.75	16.71	5.176	5.176	fig|1428.368.peg.244	fig|1428.368.peg.244	2
1334	2.73	4.86	23.85	10.06	10.06	fig|1428.368.peg.2485	fig|1428.368.peg.2485	3
1335	2.72	32.43	47.18	34.36	33.16	fig|11428.3.peg.3247	fig|11428.3.peg.3247	19
1336	2.71	4.66	10.71	2.922	2.319	fig|11428.3.peg.52	fig|11428.3.peg.52	4
1337	2.71	2.71	16.95	7.264	7.264	fig|11428.3.peg.1610	fig|11428.3.peg.1610	2
1337	0	2.03	12.83	3.632	3.632	fig|1428.368.peg.1677	fig|1428.368.peg.1677	1
1338	2.71	2.71	13.41	10.34	10.34	fig|11428.3.peg.5212	fig|11428.3.peg.5212	3
1339	2.69	2.69	13.95	4.017	4.017	fig|1428.368.peg.447	fig|1428.368.peg.447	2
1339	0	2.69	13.95	4.017	4.017	fig|11428.3.peg.1694	fig|11428.3.peg.1694	2
1340	2.69	2.69	12.04	6.882	5.376	fig|11428.3.peg.5733	fig|11428.3.peg.5733	2
1340	0	2.68	13.12	6.882	5.376	fig|1428.368.peg.3141	fig|1428.368.peg.3141	2
1341	2.67	2.71	16.1	9.598	5.263	fig|11428.3.peg.5484	fig|11428.3.peg.5484	2
1342	2.65	2.65	22.44	18.59	18.59	fig|11428.3.peg.3154	fig|11428.3.peg.3154	2
1342	0	2	14.74	10.9	10.9	fig|1428.368.peg.3956	fig|1428.368.peg.3956	1
1343	2.64	2.64	49.47	17.89	17.89	fig|1428.368.peg.777	fig|1428.368.peg.777	3
1343	0	2.64	49.47	17.89	17.89	fig|11428.3.peg.5508	fig|11428.3.peg.5508	3
1344	2.63	2.63	25.22	7.965	7.965	fig|11428.3.peg.1764	fig|11428.3.peg.1764	2
1345	2.63	2.63	10.42	9.226	6.25	fig|1428.368.peg.4596	fig|1428.368.peg.4596	2
1345	0	2.63	10.64	9.422	6.383	fig|11428.3.peg.1146	fig|11428.3.peg.1146	2
1346	2.61	2.61	7.444	5.211	5.211	fig|11428.3.peg.3773	fig|11428.3.peg.3773	2
1346	0	2.01	6.452	2.73	2.73	fig|1428.368.peg.4078	fig|1428.368.peg.4078	1
1347	2.57	6.77	16.4	10.16	10.16	fig|1428.368.peg.1353	fig|1428.368.peg.1353	4
1347	0	6.77	16.4	10.16	10.16	fig|11428.3.peg.5414	fig|11428.3.peg.5414	4
1348	2.57	2.57	12.33	10	7.333	fig|11428.3.peg.4073	fig|11428.3.peg.4073	2
1349	2.56	2.56	13.32	4.116	4.116	fig|11428.3.peg.1306	fig|11428.3.peg.1306	2
1350	2.56	2.56	16.98	6.289	6.289	fig|11428.3.peg.360	fig|11428.3.peg.360	2
1351	2.55	2.55	19.5	15.09	15.09	fig|1428.368.peg.5727	fig|1428.368.peg.5727	2
1351	0	1.62	24.53	10.06	10.06	fig|11428.3.peg.1331	fig|11428.3.peg.1331	1
1352	2.55	2.55	46.88	46.88	25	fig|1428.368.peg.4277	fig|1428.368.peg.4277	2
1353	2.55	2.55	5.66	3.459	3.459	fig|11428.3.peg.3002	fig|11428.3.peg.3002	2
1354	2.54	16.39	34.22	22.82	22.82	fig|11428.3.peg.2115	fig|11428.3.peg.2115	8
1355	2.54	2.54	12.38	4.206	4.206	fig|1428.368.peg.4475	fig|1428.368.peg.4475	2
1355	0	2.54	11.68	4.206	4.206	fig|11428.3.peg.706	fig|11428.3.peg.706	2
1356	2.53	2.53	17.71	14.86	14.86	fig|11428.3.peg.372	fig|11428.3.peg.372	2
1357	2.51	2.51	11.61	6.696	6.696	fig|11428.3.peg.2705	fig|11428.3.peg.2705	2
1358	2.5	2.5	9.315	6.027	6.027	fig|1428.368.peg.3977	fig|1428.368.peg.3977	2
1358	0	2.5	9.315	6.027	6.027	fig|11428.3.peg.3135	fig|11428.3.peg.3135	2
1359	2.48	2.48	22.22	10.81	10.81	fig|1428.368.peg.2545	fig|1428.368.peg.2545	3
1359	0	2.48	15.02	10.81	10.81	fig|11428.3.peg.2310	fig|11428.3.peg.2310	3
1360	2.48	2.48	22.64	16.98	16.98	fig|1428.368.peg.250	fig|1428.368.peg.250	2
1360	0	2.48	22.64	16.98	16.98	fig|11428.3.peg.401	fig|11428.3.peg.401	2
1361	2.48	2.48	31.67	31.67	31.67	fig|1428.368.peg.6304	fig|1428.368.peg.6304	2
1361	0	2.48	31.67	31.67	31.67	fig|11428.3.peg.1984	fig|11428.3.peg.1984	2
1362	2.45	2.45	22.85	7.615	2.605	fig|11428.3.peg.616	fig|11428.3.peg.616	1
1363	2.44	2.44	13.95	4.492	4.492	fig|1428.368.peg.4630	fig|1428.368.peg.4630	2
1363	0	2.44	14.66	4.492	4.492	fig|11428.3.peg.4935	fig|11428.3.peg.4935	2
1364	2.44	2.44	19.18	13.06	13.06	fig|11428.3.peg.3644	fig|11428.3.peg.3644	2
1365	2.42	2.42	12.68	9.859	5.282	fig|11428.3.peg.2610	fig|11428.3.peg.2610	1
1366	2.41	6.57	24.53	12.94	12.94	fig|1428.368.peg.1919	fig|1428.368.peg.1919	5
1367	2.41	2.41	24.58	24.58	24.58	fig|11428.3.peg.404	fig|11428.3.peg.404	3
1368	2.4	2.4	12.86	4.987	4.987	fig|1428.368.peg.4765	fig|1428.368.peg.4765	2
1368	0	2.39	11.29	4.987	4.987	fig|11428.3.peg.984	fig|11428.3.peg.984	2
1369	2.4	2.4	24.22	18.63	18.63	fig|11428.3.peg.2778	fig|11428.3.peg.2778	2
1369	0	2	13.79	6.897	6.897	fig|1428.368.peg.1044	fig|1428.368.peg.1044	1
1370	2.37	2.37	17.16	8.911	3.96	fig|11428.3.peg.3238	fig|11428.3.peg.3238	1
1370	0	2.02	28.95	7.895	3.947	fig|1428.368.peg.3873	fig|1428.368.peg.3873	1
1371	2.37	2.37	11.19	7.22	7.22	fig|1428.368.peg.4464	fig|1428.368.peg.4464	2
1371	0	2.37	11.19	7.22	7.22	fig|11428.3.peg.694	fig|11428.3.peg.694	2
1372	2.35	2.94	14.18	6.104	3.411	fig|11428.3.peg.2736	fig|11428.3.peg.2736	3
1373	2.35	2.35	12.19	5.372	1.446	fig|11428.3.peg.5721	fig|11428.3.peg.5721	1
1374	2.33	16.37	38.28	32.05	29.67	fig|1428.368.peg.1320	fig|1428.368.peg.1320	11
1375	2.33	2.33	17.96	13.47	13.47	fig|1428.368.peg.3938	fig|1428.368.peg.3938	3
1375	0	2.33	17.96	13.47	13.47	fig|11428.3.peg.3172	fig|11428.3.peg.3172	3
1376	2.33	2.33	24	14	14	fig|1428.368.peg.2824	fig|1428.368.peg.2824	2
1376	0	2.33	21.58	15.11	15.11	fig|11428.3.peg.3496	fig|11428.3.peg.3496	2
1377	2.33	2.33	12.8	7.733	5.067	fig|11428.3.peg.2351	fig|11428.3.peg.2351	1
1378	2.32	3.07	13.87	11.34	6.723	fig|11428.3.peg.4338	fig|11428.3.peg.4338	2
1379	2.32	2.32	30.05	7.071	3.03	fig|11428.3.peg.3491	fig|11428.3.peg.3491	1
1380	2.32	2.32	19.33	7.362	3.681	fig|11428.3.peg.2713	fig|11428.3.peg.2713	1
1380	0	2.32	16.98	7.407	3.704	fig|1428.368.peg.4495	fig|1428.368.peg.4495	1
1381	2.31	2.33	39.19	37.84	24.32	fig|1428.368.peg.4523	fig|1428.368.peg.4523	2
1381	0	2.33	39.19	37.84	24.32	fig|11428.3.peg.5244	fig|11428.3.peg.5244	2
1382	2.31	2.31	24.81	13.74	4.198	fig|11428.3.peg.1120	fig|11428.3.peg.1120	1
1382	0	2.2	20.23	9.924	4.198	fig|1428.368.peg.1895	fig|1428.368.peg.1895	1
1383	2.3	2.3	24.59	21.31	7.377	fig|1428.368.peg.3365	fig|1428.368.peg.3365	1
1383	0	2.3	24.59	21.31	7.377	fig|11428.3.peg.4528	fig|11428.3.peg.4528	1
1384	2.29	25.32	27.05	22.26	19.86	fig|1428.368.peg.5158	fig|1428.368.peg.5158	14
1385	2.28	2.28	12.15	3.107	3.107	fig|11428.3.peg.1409	fig|11428.3.peg.1409	2
1386	2.27	2.27	12.62	7.077	4.308	fig|11428.3.peg.1112	fig|11428.3.peg.1112	1
1386	0	2.26	10.77	7.077	4.308	fig|1428.368.peg.6408	fig|1428.368.peg.6408	1
1387	2.26	2.26	12.68	1.875	0.8036	fig|1428.368.peg.1697	fig|1428.368.peg.1697	1
1387	0	2.26	13.39	1.875	0.8036	fig|11428.3.peg.1588	fig|11428.3.peg.1588	1
1388	2.25	2.25	7.09	7.09	4.104	fig|11428.3.peg.3467	fig|11428.3.peg.3467	1
1389	2.24	2.24	13.22	4.691	4.691	fig|1428.368.peg.3851	fig|1428.368.peg.3851	2
1390	2.24	2.24	5.495	3.48	2.015	fig|11428.3.peg.2754	fig|11428.3.peg.2754	1
1390	0	2.24	4.57	3.473	2.011	fig|1428.368.peg.1020	fig|1428.368.peg.1020	1
1391	2.23	2.44	15.95	12.84	10.51	fig|11428.3.peg.4863	fig|11428.3.peg.4863	4
1392	2.23	2.23	26.91	6.951	3.363	fig|11428.3.peg.4409	fig|11428.3.peg.4409	1
1392	0	2.23	22.65	6.951	3.363	fig|1428.368.peg.4261	fig|1428.368.peg.4261	1
1393	2.22	2.22	16.62	7.715	4.451	fig|11428.3.peg.906	fig|11428.3.peg.906	1
1394	2.22	2.22	21.48	12.22	6.296	fig|11428.3.peg.3854	fig|11428.3.peg.3854	1
1394	0	2.22	18.15	12.22	6.296	fig|1428.368.peg.5506	fig|1428.368.peg.5506	1
1395	2.22	2.22	20.4	12.4	6.4	fig|11428.3.peg.4771	fig|11428.3.peg.4771	1
1396	2.2	18.55	19.81	18.11	16.87	fig|1428.368.peg.6247	fig|1428.368.peg.6247	11
1397	2.2	2.2	18.12	10.87	8.696	fig|1428.368.peg.4503	fig|1428.368.peg.4503	1
1397	0	2.2	18.12	10.87	8.696	fig|11428.3.peg.5268	fig|11428.3.peg.5268	1
1398	2.19	29.61	64.86	56.88	44.57	fig|1428.368.peg.808	fig|1428.368.peg.808	14
1399	2.18	4.24	15.42	15.42	7.905	fig|11428.3.peg.5588	fig|11428.3.peg.5588	2
1400	2.18	2.18	8.36	8.36	8.36	fig|11428.3.peg.3288	fig|11428.3.peg.3288	2
1400	0	2	4.18	4.18	4.18	fig|1428.368.peg.4819	fig|1428.368.peg.4819	1
1401	2.17	12.37	37.09	28.73	22.18	fig|11428.3.peg.5234	fig|11428.3.peg.5234	6
1402	2.17	2.17	15.13	3.885	1.738	fig|1428.368.peg.752	fig|1428.368.peg.752	1
1402	0	2.17	13.39	3.885	1.738	fig|11428.3.peg.5531	fig|11428.3.peg.5531	1
1403	2.16	21.94	44.7	39.17	39.17	fig|11428.3.peg.3500	fig|11428.3.peg.3500	13
1404	2.16	2.16	19.08	16.03	9.924	fig|11428.3.peg.5560	fig|11428.3.peg.5560	1
1405	2.15	72.06	50.5	43.66	41.35	fig|1428.368.peg.1664	fig|1428.368.peg.1664	39
1406	2.15	2.3	10.36	3.641	2.661	fig|1428.368.peg.5212	fig|1428.368.peg.5212	2
1406	0	2.15	15.83	4.062	1.821	fig|11428.3.peg.1379	fig|11428.3.peg.1379	1
1407	2.15	2.16	44.59	29.73	17.57	fig|11428.3.peg.4775	fig|11428.3.peg.4775	2
1408	2.15	2.15	27.85	12.03	6.329	fig|1428.368.peg.6346	fig|1428.368.peg.6346	1
1409	2.13	2.13	6.364	6.364	5.455	fig|1428.368.peg.2675	fig|1428.368.peg.2675	1
1409	0	2.13	6.364	6.364	5.455	fig|11428.3.peg.3350	fig|11428.3.peg.3350	1
1410	2.12	16.52	44.14	44.14	39.64	fig|1428.368.peg.4571	fig|1428.368.peg.4571	8
1411	2.12	6.27	24.14	21.55	17.67	fig|1428.368.peg.3553	fig|1428.368.peg.3553	3
1412	2.12	2.12	52.38	23.81	14.29	fig|11428.3.peg.4943	fig|11428.3.peg.4943	1
1412	0	2.12	34.52	23.81	14.29	fig|1428.368.peg.4638	fig|1428.368.peg.4638	1
1413	2.11	2.11	36	22.67	7.333	fig|11428.3.peg.2782	fig|11428.3.peg.2782	1
1414	2.11	2.11	15.92	11.46	7.643	fig|11428.3.peg.3101	fig|11428.3.peg.3101	1
1415	2.1	2.1	15.24	3.404	1.945	fig|11428.3.peg.2477	fig|11428.3.peg.2477	1
1415	0	2.1	8.266	3.404	1.945	fig|1428.368.peg.1720	fig|1428.368.peg.1720	1
1416	2.1	2.1	20	20	7.368	fig|11428.3.peg.3343	fig|11428.3.peg.3343	1
1417	2.1	2.1	13.33	12.8	10.67	fig|11428.3.peg.1858	fig|11428.3.peg.1858	2
1418	2.1	2.1	10.88	8.07	4.561	fig|1428.368.peg.5156	fig|1428.368.peg.5156	1
1418	0	2.1	10.88	8.07	4.561	fig|11428.3.peg.1783	fig|11428.3.peg.1783	1
1419	2.1	2.1	16.45	16.45	12.5	fig|1428.368.peg.6197	fig|1428.368.peg.6197	1
1420	2.09	51.02	60.32	56.91	44.29	fig|1428.368.peg.3149	fig|1428.368.peg.3149	28
1421	2.09	2.09	31.25	11.54	5.769	fig|11428.3.peg.5772	fig|11428.3.peg.5772	1
1421	0	2.09	27.4	11.54	5.769	fig|1428.368.peg.3102	fig|1428.368.peg.3102	1
1422	2.09	2.09	13.39	7.159	4.388	fig|11428.3.peg.1986	fig|11428.3.peg.1986	1
1423	2.09	2.09	19.5	11.95	5.031	fig|11428.3.peg.5667	fig|11428.3.peg.5667	1
1423	0	2	6.918	5.031	5.031	fig|1428.368.peg.2414	fig|1428.368.peg.2414	1
1424	2.08	2.08	24.56	10.28	5.764	fig|11428.3.peg.2226	fig|11428.3.peg.2226	1
1424	0	2.08	16.79	10.28	5.764	fig|1428.368.peg.3442	fig|1428.368.peg.3442	1
1425	2.08	2.08	18.58	5.191	5.191	fig|11428.3.peg.3429	fig|11428.3.peg.3429	2
1426	2.07	2.07	13.62	6.452	4.301	fig|1428.368.peg.222	fig|1428.368.peg.222	1
1427	2.06	75.08	75.68	75.68	75.68	fig|1428.368.peg.2908	fig|1428.368.peg.2908	56
1428	2.06	15.62	47.42	47.42	42.72	fig|1428.368.peg.4581	fig|1428.368.peg.4581	8
1429	2.06	2.06	19.05	8.009	5.411	fig|11428.3.peg.2023	fig|11428.3.peg.2023	1
1430	2.06	2.06	7.343	3.888	2.376	fig|1428.368.peg.2863	fig|1428.368.peg.2863	1
1431	2.05	47.3	47.78	44.26	42.86	fig|11428.3.peg.4520	fig|11428.3.peg.4520	26
1432	2.05	2.05	14.06	1.506	1.506	fig|11428.3.peg.7	fig|11428.3.peg.7	1
1433	2.05	2.05	16.55	2.6	2.6	fig|11428.3.peg.687	fig|11428.3.peg.687	1
1433	0	2.55	18.68	4.019	4.019	fig|1428.368.peg.1559	fig|1428.368.peg.1559	2
1434	2.05	2.05	25.4	9.677	5.645	fig|11428.3.peg.4507	fig|11428.3.peg.4507	1
1434	0	2.01	27.49	5.578	5.578	fig|1428.368.peg.3385	fig|1428.368.peg.3385	1
1435	2.04	36.01	54	51.09	47.22	fig|1428.368.peg.3894	fig|1428.368.peg.3894	21
1436	2.04	8.3	24.34	15.34	12.96	fig|11428.3.peg.871	fig|11428.3.peg.871	5
1437	2.04	6.06	35.04	19.23	14.96	fig|11428.3.peg.2143	fig|11428.3.peg.2143	3
1438	2.04	2.08	39.91	9.174	6.422	fig|11428.3.peg.1548	fig|11428.3.peg.1548	1
1439	2.04	2.04	18.59	5.657	3.03	fig|11428.3.peg.4696	fig|11428.3.peg.4696	1
1440	2.04	2.04	26.43	8.811	5.727	fig|11428.3.peg.412	fig|11428.3.peg.412	1
1441	2.04	2.04	19.57	10	6.087	fig|1428.368.peg.5423	fig|1428.368.peg.5423	1
1442	2.04	2.04	18.28	9.319	5.376	fig|1428.368.peg.2880	fig|1428.368.peg.2880	1
1442	0	2.04	16.13	9.319	5.376	fig|11428.3.peg.3552	fig|11428.3.peg.3552	1
1443	2.04	2.04	7.838	2.375	2.375	fig|11428.3.peg.5172	fig|11428.3.peg.5172	1
1444	2.03	12.1	66.94	66.94	52.07	fig|11428.3.peg.3462	fig|11428.3.peg.3462	8
1445	2.03	2.03	14.53	2.031	2.031	fig|1428.368.peg.3282	fig|1428.368.peg.3282	1
1446	2.03	2.03	33.18	8.879	4.673	fig|11428.3.peg.4140	fig|11428.3.peg.4140	1
1447	2.03	2.03	15.2	5.339	5.339	fig|11428.3.peg.5483	fig|11428.3.peg.5483	1
1448	2.03	2.03	12.43	4.972	3.315	fig|1428.368.peg.3953	fig|1428.368.peg.3953	1
1448	0	2	10.77	3.315	3.315	fig|11428.3.peg.3157	fig|11428.3.peg.3157	1
1449	2.03	2.03	17.23	6.303	3.361	fig|11428.3.peg.3088	fig|11428.3.peg.3088	1
1449	0	2.01	6.009	3.433	3.433	fig|1428.368.peg.234	fig|1428.368.peg.234	1
1450	2.03	2.03	11.83	4.198	4.198	fig|1428.368.peg.2795	fig|1428.368.peg.2795	1
1450	0	2.03	11.83	4.198	4.198	fig|11428.3.peg.3469	fig|11428.3.peg.3469	1
1451	2.03	2.03	18.18	11.36	7.955	fig|11428.3.peg.5432	fig|11428.3.peg.5432	1
1451	0	0.25	11.36	11.36	7.955	fig|1428.368.peg.1336	fig|1428.368.peg.1336	1
1452	2.03	2.03	12.32	6.522	6.522	fig|1428.368.peg.4301	fig|1428.368.peg.4301	1
1452	0	2.03	12.32	6.522	6.522	fig|11428.3.peg.4200	fig|11428.3.peg.4200	1
1453	2.02	36	54	53.51	48.43	fig|1428.368.peg.3344	fig|1428.368.peg.3344	20
1454	2.02	18.71	46.46	39.38	35.98	fig|1428.368.peg.2943	fig|1428.368.peg.2943	9
1455	2.02	11.44	40.79	22.36	21.13	fig|1428.368.peg.1042	fig|1428.368.peg.1042	7
1456	2.02	2.57	29.5	9.44	6.49	fig|1428.368.peg.5056	fig|1428.368.peg.5056	2
1457	2.02	2.38	5.774	3.926	2.54	fig|11428.3.peg.3797	fig|11428.3.peg.3797	1
1457	0	2.37	6.005	6.005	2.54	fig|1428.368.peg.4057	fig|1428.368.peg.4057	1
1458	2.02	2.18	25	10.12	5.357	fig|11428.3.peg.3100	fig|11428.3.peg.3100	1
1458	0.01	2.01	18.45	5.357	5.357	fig|1428.368.peg.4013	fig|1428.368.peg.4013	1
1459	2.02	2.03	15.02	5.15	5.15	fig|11428.3.peg.1371	fig|11428.3.peg.1371	1
1460	2.02	2.02	29.6	2.804	2.804	fig|11428.3.peg.4979	fig|11428.3.peg.4979	1
1460	0	2.01	20.87	2.804	2.804	fig|1428.368.peg.5554	fig|1428.368.peg.5554	1
1461	2.02	2.02	35.56	10	6.667	fig|11428.3.peg.2233	fig|11428.3.peg.2233	1
1462	2.02	2.02	8.56	1.946	1.946	fig|11428.3.peg.2034	fig|11428.3.peg.2034	1
1462	0	2.02	6.42	1.946	1.946	fig|1428.368.peg.4936	fig|1428.368.peg.4936	1
1463	2.02	2.02	5.304	3.744	2.184	fig|11428.3.peg.2644	fig|11428.3.peg.2644	1
1464	2.02	2.02	3.836	3.562	3.562	fig|1428.368.peg.4676	fig|1428.368.peg.4676	1
1464	0	2.01	10.14	6.027	3.562	fig|11428.3.peg.896	fig|11428.3.peg.896	1
1465	2.02	2.02	10.93	3.311	3.311	fig|11428.3.peg.2451	fig|11428.3.peg.2451	1
1466	2.01	47.36	68.7	68.44	68.44	fig|1428.368.peg.756	fig|1428.368.peg.756	44
1467	2.01	23.15	44.62	32.95	28.15	fig|1428.368.peg.2903	fig|1428.368.peg.2903	16
1468	2.01	10.26	56.8	56.8	43.2	fig|11428.3.peg.2584	fig|11428.3.peg.2584	5
1469	2.01	2.41	17.14	3.759	2.256	fig|11428.3.peg.576	fig|11428.3.peg.576	2
1470	2.01	2.02	9.446	6.366	2.875	fig|11428.3.peg.4415	fig|11428.3.peg.4415	1
1471	2.01	2.01	27.82	7.087	7.087	fig|11428.3.peg.4699	fig|11428.3.peg.4699	1
1472	2.01	2.01	10.16	1.719	1.719	fig|11428.3.peg.2330	fig|11428.3.peg.2330	1
1473	2.01	2.01	25	4.747	4.747	fig|11428.3.peg.721	fig|11428.3.peg.721	1
1474	2.01	2.01	17.7	3.416	3.416	fig|11428.3.peg.803	fig|11428.3.peg.803	1
1474	0	2.01	14.91	3.416	3.416	fig|1428.368.peg.498	fig|1428.368.peg.498	1
1475	2.01	2.01	45.35	42.98	42.54	RRRRRfig|11428.3.peg.4103REVERSED		1
1476	2.01	2.01	20.79	7.178	3.218	fig|1428.368.peg.6094	fig|1428.368.peg.6094	1
1476	0	2.01	15.35	7.178	3.218	fig|11428.3.peg.5852	fig|11428.3.peg.5852	1
1477	2.01	2.01	17.46	3.11	3.11	fig|1428.368.peg.6082	fig|1428.368.peg.6082	1
1477	0	2.01	17.46	3.11	3.11	fig|11428.3.peg.116	fig|11428.3.peg.116	1
1478	2.01	2.01	15.97	4.832	2.521	fig|1428.368.peg.2567	fig|1428.368.peg.2567	1
1479	2.01	2.01	14.04	3.008	3.008	fig|11428.3.peg.2704	fig|11428.3.peg.2704	1
1480	2.01	2.01	13.99	2.976	2.976	fig|1428.368.peg.55	fig|1428.368.peg.55	1
1481	2.01	2.01	21.25	5.226	5.226	fig|1428.368.peg.1028	fig|1428.368.peg.1028	1
1482	2.01	2.01	43.7	10.37	10.37	fig|11428.3.peg.1947	fig|11428.3.peg.1947	1
1483	2.01	2.01	16.1	4.661	4.661	fig|11428.3.peg.1695	fig|11428.3.peg.1695	1
1483	0	2.01	11.44	4.661	4.661	fig|1428.368.peg.448	fig|1428.368.peg.448	1
1484	2.01	2.01	8.467	3.204	3.204	fig|1428.368.peg.6133	fig|1428.368.peg.6133	1
1484	0	2.01	8.467	3.204	3.204	fig|11428.3.peg.5895	fig|11428.3.peg.5895	1
1485	2.01	2.01	9.507	2.465	2.465	fig|1428.368.peg.4898	fig|1428.368.peg.4898	1
1485	0	2	8.099	2.465	2.465	fig|11428.3.peg.2064	fig|11428.3.peg.2064	1
1486	2.01	2.01	35.9	17.95	17.95	fig|11428.3.peg.4916	fig|11428.3.peg.4916	1
1486	0	2	34.62	17.95	17.95	fig|1428.368.peg.4612	fig|1428.368.peg.4612	1
1487	2.01	2.01	17.91	4.478	4.478	fig|11428.3.peg.4730	fig|11428.3.peg.4730	1
1488	2.01	2.01	8.228	3.165	3.165	fig|11428.3.peg.3275	fig|11428.3.peg.3275	1
1489	2.01	2.01	11.36	5.047	5.047	fig|1428.368.peg.5459	fig|1428.368.peg.5459	1
1489	0	2.01	7.571	5.047	5.047	fig|11428.3.peg.1347	fig|11428.3.peg.1347	1
1490	2.01	2.01	20	10.3	10.3	fig|1428.368.peg.488	fig|1428.368.peg.488	1
1490	0	2.01	19.64	10.12	10.12	fig|11428.3.peg.794	fig|11428.3.peg.794	1
1491	2.01	2.01	7.576	3.788	3.788	fig|1428.368.peg.4535	fig|1428.368.peg.4535	1
1491	0	2	7.197	3.788	3.788	fig|11428.3.peg.5232	fig|11428.3.peg.5232	1
1492	2.01	2.01	13.17	5.366	5.366	fig|1428.368.peg.3960	fig|1428.368.peg.3960	1
1492	0	2.01	13.17	5.366	5.366	fig|11428.3.peg.3150	fig|11428.3.peg.3150	1
1493	2.01	2.01	24.83	7.586	7.586	fig|11428.3.peg.229	fig|11428.3.peg.229	1
1494	2.01	2.01	9.79	3.263	3.263	fig|11428.3.peg.1289	fig|11428.3.peg.1289	1
1495	2.01	2.01	6.485	4.096	4.096	fig|1428.368.peg.6199	fig|1428.368.peg.6199	1
1495	0	2	11.26	4.096	4.096	fig|11428.3.peg.5960	fig|11428.3.peg.5960	1
1496	2.01	2.01	8.676	5.023	5.023	fig|1428.368.peg.139	fig|1428.368.peg.139	1
1497	2.01	2.01	4.972	2.762	2.762	fig|11428.3.peg.5870	fig|11428.3.peg.5870	1
1498	2.01	2.01	11.68	7.944	7.944	fig|11428.3.peg.260	fig|11428.3.peg.260	1
1498	0	2	7.944	7.944	7.944	fig|1428.368.peg.606	fig|1428.368.peg.606	1
1499	2.01	2.01	14.78	6.897	6.897	fig|11428.3.peg.1495	fig|11428.3.peg.1495	1
1500	2	83.75	88.1	87.85	85.82	fig|1428.368.peg.6324	fig|1428.368.peg.6324	60
1501	2	76.48	65.5	62.83	61.67	fig|11428.3.peg.4698	fig|11428.3.peg.4698	50
1502	2	68.39	54.94	49.29	44.63	fig|1428.368.peg.3985	fig|1428.368.peg.3985	35
1503	2	59.19	59.2	59.2	58.77	fig|1428.368.peg.2906	fig|1428.368.peg.2906	49
1504	2	57.96	84.52	79.44	78.93	fig|1428.368.peg.5532	fig|1428.368.peg.5532	33
1505	2	54.61	66.67	62.9	60.29	fig|11428.3.peg.1827	fig|11428.3.peg.1827	33
1506	2	47.97	81.33	79.11	77.78	fig|1428.368.peg.5757	fig|1428.368.peg.5757	26
1507	2	43.32	74.58	71.86	71.86	fig|11428.3.peg.2317	fig|11428.3.peg.2317	30
1508	2	40.56	44.92	42.89	42.89	fig|11428.3.peg.958	fig|11428.3.peg.958	28
1509	2	40.54	50.26	48.46	46.92	fig|1428.368.peg.2146	fig|1428.368.peg.2146	26
1510	2	39.71	37.7	32.16	30.01	fig|1428.368.peg.5631	fig|1428.368.peg.5631	22
1511	2	36.8	43.73	36.59	33.8	fig|1428.368.peg.5735	fig|1428.368.peg.5735	18
1512	2	35.17	47.41	44.93	42.24	fig|1428.368.peg.4604	fig|1428.368.peg.4604	22
1513	2	34.89	47.66	39.79	32.22	fig|1428.368.peg.3605	fig|1428.368.peg.3605	18
1514	2	32	76.15	76.15	76.15	fig|1428.368.peg.2167	fig|1428.368.peg.2167	19
1515	2	31.5	48.66	48.66	44.63	fig|11428.3.peg.845	fig|11428.3.peg.845	16
1516	2	31.11	34.96	30.72	30.72	fig|1428.368.peg.5761	fig|1428.368.peg.5761	21
1517	2	30.64	57.25	49.62	47.33	fig|11428.3.peg.1674	fig|11428.3.peg.1674	20
1518	2	30.05	62.25	59.31	59.31	fig|1428.368.peg.4511	fig|1428.368.peg.4511	17
1519	2	29.6	77.98	63.1	61.31	fig|1428.368.peg.3337	fig|1428.368.peg.3337	17
1520	2	28.77	53.37	51.48	49.33	fig|1428.368.peg.6150	fig|1428.368.peg.6150	16
1521	2	27.86	57.97	47.46	47.12	fig|1428.368.peg.3915	fig|1428.368.peg.3915	17
1522	2	27.48	74.88	73.95	73.95	fig|1428.368.peg.833	fig|1428.368.peg.833	18
1523	2	27.37	61.23	58.15	58.15	fig|1428.368.peg.2707	fig|1428.368.peg.2707	14
1524	2	26.5	91.22	91.22	86.49	fig|11428.3.peg.964	fig|11428.3.peg.964	24
1525	2	26.23	51.67	51.67	48.61	fig|11428.3.peg.2134	fig|11428.3.peg.2134	19
1526	2	26	50	45.29	45.29	fig|11428.3.peg.2661	fig|11428.3.peg.2661	14
1527	2	24.37	52.73	50.8	46.62	fig|11428.3.peg.2041	fig|11428.3.peg.2041	16
1528	2	24.11	43.64	41.45	35.27	fig|11428.3.peg.4494	fig|11428.3.peg.4494	13
1529	2	23.74	32.08	27.99	27.99	fig|1428.368.peg.5510	fig|1428.368.peg.5510	16
1530	2	22	45.39	43.69	43.69	fig|1428.368.peg.6140	fig|1428.368.peg.6140	15
1531	2	21.7	40.51	36.2	33.67	fig|1428.368.peg.4775	fig|1428.368.peg.4775	11
1532	2	21.29	24.81	15.76	15.76	fig|11428.3.peg.5947	fig|11428.3.peg.5947	11
1533	2	20.37	50.36	38.44	36.5	fig|1428.368.peg.3724	fig|1428.368.peg.3724	11
1534	2	20.36	32.98	26.39	26.39	fig|11428.3.peg.4523	fig|11428.3.peg.4523	10
1535	2	20.14	43	43	43	fig|1428.368.peg.3892	fig|1428.368.peg.3892	11
1536	2	20	33.9	31.51	31.51	fig|1428.368.peg.2881	fig|1428.368.peg.2881	10
1537	2	19.81	27.1	23	21.83	fig|1428.368.peg.6248	fig|1428.368.peg.6248	14
[truncated: 408 more rows]

## Sheet: Peptidesummary
Table S4.2 Peptide summary of the global search with the supernatants and solubilized proteins from spore/crystal mixtures with Protein Pilot v4.5
Names	Contrib	Conf	Sequence	Modifications	Cleavages	dMass	Prec MW	Prec m/z	Theor MW	Theor m/z	Theor z	Sc	Spectrum
fig|1428.368.peg.1048	2	99	AAGLAIATR		cleaved D-A@N-term	7.40871e-05	842.497	422.256	842.497	422.256	2	13	10.1.1.1588.5
fig|1428.368.peg.1048	2	99	AASQIEDADMAK		cleaved S-A@N-term	-0.00403076	1248.56	625.288	1248.57	625.29	2	13	10.1.1.1541.3
fig|1428.368.peg.1048	2	99	ADAIQAAFNTAITGL		cleaved L-T@C-term	-0.00129359	1475.76	738.888	1475.76	738.888	2	23	11.1.1.2751.2
fig|1428.368.peg.1048	2	99	ADAIQAAFNTAITGLTAGTPN		cleaved N-T@C-term	0.00454689	2017.02	673.346	2017.01	673.344	3	23	11.1.1.2852.2
fig|1428.368.peg.1048	2	99	ADAIQAAFNTAITGLTAGTPNTSN		cleaved N-P@C-term	0.00770133	2319.14	774.055	2319.13	774.052	3	23	12.1.1.3754.3
fig|1428.368.peg.1048	2	99	ADAIQAAFNTAITGLTAGTPNTSNPSSAVDSIDAALK	Dehydrated(D)@2		0.0204191	3555.79	1186.27	3555.77	1186.26	3	27	10.1.1.4896.2
fig|1428.368.peg.1048	2	99	ADKADAIQAAF		cleaved F-N@C-term; missed K-A@3	-0.00340334	1119.55	560.784	1119.56	560.785	2	17	12.1.1.1711.2
fig|1428.368.peg.1048	2	99	ADKADAIQAAFN		cleaved N-T@C-term; missed K-A@3	-0.00215934	1233.6	617.806	1233.6	617.807	2	16	10.1.1.1729.9
fig|1428.368.peg.1048	2	99	ADKADAIQAAFNTAITGLTAG		cleaved G-T@C-term; missed K-A@3	-0.00176088	2019.03	674.016	2019.03	674.016	3	15	11.1.1.2672.2
fig|1428.368.peg.1048	2	99	ADKADAIQAAFNTAITGLTAGTPN		cleaved N-T@C-term; missed K-A@3	0.00698831	2331.18	778.067	2331.17	778.064	3	25	10.1.1.3475.2
fig|1428.368.peg.1048	2	99	ADKADAIQAAFNTAITGLTAGTPNTSN		cleaved N-P@C-term; missed K-A@3	0.00391695	2633.3	878.773	2633.29	878.772	3	28	10.1.1.3441.2
fig|1428.368.peg.1048	2	99	ADKADAIQAAFNTAITGLTAGTPNTSNPSSAVDSIDAALK		missed K-A@3	0.0104181	3887.95	972.995	3887.94	972.992	4	25	10.1.1.3458.2
fig|1428.368.peg.1048	2	99	ADNSVKIQTLDSADTNK		missed K-I@6	0.0130306	1818.91	607.31	1818.9	607.306	3	13	10.1.1.1605.13
fig|1428.368.peg.1048	2	99	ADPSTFALDVNTAK		cleaved N-A@N-term	-0.0381974	1448.68	725.346	1448.71	725.365	2	17	13.1.1.1620.4
fig|1428.368.peg.1048	2	99	ADQNADPSTF		cleaved F-A@C-term	-0.00188588	1064.44	533.227	1064.44	533.228	2	10	11.1.1.1724.8
fig|1428.368.peg.1048	2	99	ADQNADPSTFALDVN		cleaved N-T@C-term	-0.0039422	1576.7	789.356	1576.7	789.358	2	20	11.1.1.2029.6
fig|1428.368.peg.1048	2	99	ADQNADPSTFALDVNTAK			-0.00369784	1876.88	939.446	1876.88	939.447	2	25	10.1.1.1795.7
fig|1428.368.peg.1048	2	99	ADQNADPSTFALDVNTAKESFDK		missed K-E@18	0.00772808	2483.15	828.725	2483.15	828.722	3	21	10.1.1.2232.2
fig|1428.368.peg.1048	2	99	ADQNADPSTFALDVNTAKESFDKIK		missed K-E@18; missed K-I@23	0.00622042	2724.33	682.09	2724.32	682.088	4	21	11.1.1.2130.5
fig|1428.368.peg.1048	2	99	AFNDYAVADPADK		cleaved N-A@N-term	0.00281801	1395.63	698.824	1395.63	698.823	2	15	12.1.1.1641.6
fig|1428.368.peg.1048	2	99	AFNDYAVADPADKADK		cleaved N-A@N-term; missed K-A@13	0.00624035	1709.8	570.939	1709.79	570.937	3	15	10.1.1.1666.8
fig|1428.368.peg.1048	2	99	ALDVNTAK		cleaved F-A@N-term	-0.00219606	830.448	416.231	830.45	416.232	2	9	12.1.1.1373.6
fig|1428.368.peg.1048	2	99	ANNTQDGMSLIR		cleaved A-A@N-term	0.000702085	1318.63	660.323	1318.63	660.322	2	16	10.1.1.1697.11
fig|1428.368.peg.1048	2	99	ANQTPQMVSK	Deamidated(Q)@6	cleaved Q-A@N-term	-0.00382214	1103.52	552.769	1103.53	552.771	2	12	12.1.1.1367.4
fig|1428.368.peg.1048	2	99	ARESGLGVAANNTQD		cleaved D-G@C-term; missed R-E@2	-0.00398541	1501.71	751.861	1501.71	751.863	2	14	10.1.1.1510.9
fig|1428.368.peg.1048	2	99	ARESGLGVAANNTQDGMSLIR		missed R-E@2	0.00387735	2159.08	540.777	2159.08	540.776	4	21	10.1.1.1704.7
fig|1428.368.peg.1048	2	99	ASAASQIEDADMAK		cleaved M-A@N-term	0.00184299	1406.64	704.326	1406.63	704.325	2	17	10.1.1.1632.25
fig|1428.368.peg.1048	2	99	ASDDAAGLAIATR		cleaved N-A@N-term	-0.0025158	1230.62	616.316	1230.62	616.318	2	19	1.1.1.1536.6
fig|1428.368.peg.1048	2	99	ATLGATLNR			0.000260042	915.514	458.764	915.514	458.764	2	15	2.1.1.1555.9
fig|1428.368.peg.1048	2	99	ATLGATLNRLDFNVNNLK		missed R-L@9	0.00731059	1973.08	658.699	1973.07	658.697	3	23	1.1.1.2082.2
fig|1428.368.peg.1048	2	99	AVDSIDAALK		cleaved S-A@N-term	0.000815334	1001.54	501.777	1001.54	501.777	2	11	10.1.1.1696.6
fig|1428.368.peg.1048	2	99	DAAGLAIATR		cleaved D-D@N-term	-0.00213369	957.522	479.768	957.524	479.769	2	16	10.1.1.1650.3
fig|1428.368.peg.1048	2	99	DDAAGLAIATR		cleaved S-D@N-term	-0.000622548	1072.55	537.283	1072.55	537.283	2	17	10.1.1.1685.4
fig|1428.368.peg.1048	2	99	DGMSLIR		cleaved Q-D@N-term	-0.000844604	790.4	396.207	790.401	396.208	2	8	10.1.1.1705.2
fig|1428.368.peg.1048	2	99	DIANQSANGTNTADNQQALQK	Ammonia-loss(N)@8		-0.00954591	2184	1093.01	2184	1093.01	2	23	10.1.1.1561.3
fig|1428.368.peg.1048	2	99	DIANQSANGTNTADNQQALQKEFGQLK	Deamidated(Q)@20	missed K-E@21	-0.0114588	2904.37	969.132	2904.39	969.136	3	18	11.1.1.2020.7
fig|1428.368.peg.1048	2	99	EFGQLK	Glu->pyro-Glu@N-term		-1.75609e-05	702.37	352.192	702.37	352.192	2	9	11.1.1.1891.2
fig|1428.368.peg.1048	2	99	EFGQLKEQISY		cleaved Y-I@C-term; missed K-E@6	0.000178157	1340.66	671.338	1340.66	671.338	2	15	14.1.1.1880.9
fig|1428.368.peg.1048	2	99	EFGQLKEQISYIADNTEFNDK		missed K-E@6	0.00346977	2488.18	1245.1	2488.18	1245.1	2	24	10.1.1.2634.12
fig|1428.368.peg.1048	2	99	EFGQLKEQISYIADNTEFNDKTLLK	Glu->pyro-Glu@N-term	missed K-E@6; missed K-T@21	0.00511495	2925.48	976.168	2925.48	976.166	3	26	10.1.1.3445.5
fig|1428.368.peg.1048	2	99	EMSEMTK			0.000292473	854.352	428.183	854.351	428.183	2	7	13.1.1.1226.5
fig|1428.368.peg.1048	2	99	EQISYIADN		cleaved N-T@C-term	0.00132542	1051.48	526.749	1051.48	526.748	2	13	10.1.1.1711.6
fig|1428.368.peg.1048	2	99	EQISYIADNTEFNDK	Glu->pyro-Glu@N-term		0.00591761	1767.8	884.908	1767.8	884.905	2	19	10.1.1.2292.2
fig|1428.368.peg.1048	2	99	EQISYIADNTEFNDKTLLK		missed K-T@15	0.00558005	2241.12	748.048	2241.12	748.046	3	19	10.1.1.2115.2
fig|1428.368.peg.1048	2	99	ESFDKIK		missed K-I@5	0.000722806	865.455	433.735	865.455	433.735	2	9	14.1.1.1517.3
fig|1428.368.peg.1048	2	99	ESGLGVAANNTQD		cleaved D-G@C-term	-0.00663128	1274.57	638.291	1274.57	638.294	2	17	10.1.1.1573.10
fig|1428.368.peg.1048	2	99	ESGLGVAANNTQDG		cleaved G-M@C-term	0.00243377	1331.6	666.806	1331.6	666.805	2	19	10.1.1.1574.5
fig|1428.368.peg.1048	2	99	ESGLGVAANNTQDGM		cleaved M-S@C-term	0.000173021	1462.64	732.325	1462.64	732.325	2	24	10.1.1.1719.3
fig|1428.368.peg.1048	2	99	ESGLGVAANNTQDGMSLIR	Deamidated(N)@10; Dethiomethyl(M)@15		-0.00226344	1884.92	629.312	1884.92	629.313	3	21	10.1.1.1691.6
fig|1428.368.peg.1048	2	99	FKILNEAGISMLSQANQTPQMVSK		missed K-I@2	0.00130109	2634.35	879.125	2634.35	879.124	3	26	10.1.1.2467.4
fig|1428.368.peg.1048	2	99	FNTAITGLTAGTPNTSNPSSAVDSIDAALK		cleaved A-F@N-term	0.00715557	2933.47	978.83	2933.46	978.828	3	24	11.1.1.2391.3
fig|1428.368.peg.1048	2	99	FNVNNLK		cleaved D-F@N-term	-0.00141322	847.454	424.734	847.455	424.735	2	9	12.1.1.1577.2
fig|1428.368.peg.1048	2	99	GTNTADNQQALQK		cleaved N-G@N-term	-0.00742114	1387.66	694.838	1387.67	694.842	2	20	10.1.1.1387.3
fig|1428.368.peg.1048	2	99	GTPNTSNPSSAVDSIDAALK		cleaved A-G@N-term	-0.00283833	1943.94	972.978	1943.94	972.979	2	26	11.1.1.2031.2
fig|1428.368.peg.1048	2	99	GVTLNQLGLD		cleaved D-T@C-term	-0.00524163	1028.55	515.28	1028.55	515.282	2	16	11.1.1.2119.2
fig|1428.368.peg.1048	2	99	GVTLNQLGLDTVNIGSEK			-0.00531808	1856.98	929.497	1856.98	929.499	2	20	10.1.1.2732.22
fig|1428.368.peg.1048	2	99	GVTLNQLGLDTVNIGSEKLSAESLNVAK		missed K-L@18	0.0156042	2869.56	957.526	2869.54	957.521	3	26	10.1.1.2876.2
fig|1428.368.peg.1048	2	99	IADNTEFNDK		cleaved Y-I@N-term	0.00170361	1165.53	583.771	1165.53	583.77	2	16	13.1.1.1346.3
fig|1428.368.peg.1048	2	99	IADNTEFNDKTLLK		cleaved Y-I@N-term; missed K-T@10	0.00350303	1620.84	541.287	1620.84	541.286	3	19	10.1.1.1728.6
fig|1428.368.peg.1048	2	99	IANQSANGTNTADNQQALQK		cleaved D-I@N-term	-0.00677936	2086	696.34	2086	696.342	3	25	10.1.1.1475.5
fig|1428.368.peg.1048	2	99	IKGFIANK		missed K-G@2	-0.00305215	889.535	445.775	889.539	445.777	2	13	12.1.1.1422.4
fig|1428.368.peg.1048	2	99	ILNEAGIS		cleaved S-M@C-term	0.00131499	815.44	408.727	815.439	408.727	2	12	12.1.1.1606.2
fig|1428.368.peg.1048	2	99	ILNEAGISML		cleaved L-S@C-term	0.00587636	1059.57	530.792	1059.56	530.789	2	17	12.1.1.2745.2
fig|1428.368.peg.1048	2	99	ILNEAGISMLSQ		cleaved Q-A@C-term	-0.00195229	1274.65	638.333	1274.65	638.334	2	18	11.1.1.2119.3
fig|1428.368.peg.1048	2	99	ILNEAGISMLSQAN		cleaved N-Q@C-term	-0.00253624	1459.73	730.873	1459.73	730.874	2	23	12.1.1.2415.4
fig|1428.368.peg.1048	2	99	ILNEAGISMLSQANQTPQMVSK			0.00284388	2359.19	787.404	2359.19	787.403	3	26	1.1.1.1992.4
fig|1428.368.peg.1048	2	99	INNASDDAAGLAIATR			-0.00525827	1571.79	524.936	1571.79	524.937	3	16	1.1.1.1520.3
fig|1428.368.peg.1048	2	99	INTNINSMR	Oxidation(M)@8		-0.000817069	1077.52	539.769	1077.52	539.769	2	12	2.1.1.1454.15
fig|1428.368.peg.1048	2	99	INTNINSMRTQEYMR		missed R-T@9	0.0030073	1869.89	624.303	1869.88	624.301	3	13	13.1.1.1481.6
fig|1428.368.peg.1048	2	99	IQTLDSADTNK	Ammonia-loss(N)@10		-0.00282539	1187.56	594.789	1187.57	594.791	2	15	10.1.1.1528.6
fig|1428.368.peg.1048	2	99	IQTLDSADTNKQISIDLK		missed K-Q@11	0.00324463	2002.06	501.523	2002.06	501.522	4	19	10.1.1.1711.4
fig|1428.368.peg.1048	2	99	LDFNVNNLK	Deamidated(N)@4		-0.000720737	1076.55	539.282	1076.55	539.282	2	14	2.1.1.1850.4
fig|1428.368.peg.1048	2	99	LDFNVNNLKSQSASMASAASQIEDADMAK	Carbamidomethyl(S)@14	missed K-S@9	0.00972229	3112.45	779.121	3112.44	779.118	4	19	14.1.1.1873.8
fig|1428.368.peg.1048	2	99	LDTVNIGSEK		cleaved G-L@N-term	-0.00359804	1074.55	538.283	1074.56	538.285	2	16	10.1.1.1596.5
fig|1428.368.peg.1048	2	99	LGLDTVNIGSEK		cleaved Q-L@N-term	-0.00560287	1244.66	623.335	1244.66	623.338	2	16	10.1.1.1804.7
fig|1428.368.peg.1048	2	99	LSAESLNVAK	Dehydrated(S)@2		-0.00107498	1012.55	507.284	1012.56	507.285	2	11	10.1.1.1695.6
fig|1428.368.peg.1048	2	99	LSAESLNVAKATMAR		missed K-A@10	-0.00376691	1560.83	521.283	1560.83	521.284	3	10	11.1.1.1872.6
fig|1428.368.peg.1048	2	99	LSQANQTPQMVSK		cleaved M-L@N-term	-0.00227384	1430.72	716.365	1430.72	716.367	2	16	10.1.1.1521.6
fig|1428.368.peg.1048	2	99	LSSGKRINNASDDAAGLAIATR		missed K-R@5; missed R-I@6	0.0121025	2200.17	734.397	2200.16	734.393	3	14	3.1.1.1688.20
fig|1428.368.peg.1048	2	99	LVKADQNADPSTFALDVNTAK		missed K-A@3	0.00107108	2217.13	740.05	2217.13	740.05	3	22	10.1.1.1795.5
fig|1428.368.peg.1048	2	99	MASAASQIEDADMAK		cleaved S-M@N-term	-0.00203103	1537.67	769.844	1537.68	769.845	2	23	10.1.1.1704.9
fig|1428.368.peg.1048	2	99	MLSQANQTPQMVSK		cleaved S-M@N-term	-0.00127316	1561.76	781.886	1561.76	781.887	2	17	10.1.1.1607.21
fig|1428.368.peg.1048	2	99	MRDIANQSAN	Deamidated(N)@10	cleaved N-G@C-term; missed R-D@2	-0.00294204	1119.5	560.755	1119.5	560.756	2	15	10.1.1.1459.2
fig|1428.368.peg.1048	2	99	MRDIANQSANG	Deamidated(N)@10	cleaved G-T@C-term; missed R-D@2	0.000537916	1176.52	589.267	1176.52	589.267	2	13	10.1.1.1455.6
fig|1428.368.peg.1048	2	99	MRDIANQSANGTN	Deamidated(N)@10	cleaved N-T@C-term; missed R-D@2	-0.0106204	1391.6	696.807	1391.61	696.812	2	13	10.1.1.1460.14
fig|1428.368.peg.1048	2	99	MRDIANQSANGTNTA	Deamidated(N)@10	cleaved A-D@C-term; missed R-D@2	0.00255597	1563.7	782.856	1563.69	782.855	2	12	12.1.1.1422.12
fig|1428.368.peg.1048	2	99	MRDIANQSANGTNTAD		cleaved D-N@C-term; missed R-D@2	0.0229009	1677.76	839.888	1677.74	839.876	2	14	10.1.1.1535.4
fig|1428.368.peg.1048	2	99	MRDIANQSANGTNTADN		cleaved N-Q@C-term; missed R-D@2	-0.0106045	1791.77	896.892	1791.78	896.898	2	14	10.1.1.1478.11
fig|1428.368.peg.1048	2	99	MRDIANQSANGTNTADNQQALQK		missed R-D@2	-1.00171	2487.17	830.064	2488.17	830.398	3	9	3.1.1.1549.25
fig|1428.368.peg.1048	2	99	MRDIANQSANGTNTADNQQALQKEFGQLK	Deamidated(N)@10; Deamidated(Q)@22	missed R-D@2; missed K-E@23	-0.00454059	3192.51	799.134	3192.51	799.135	4	29	11.1.1.1985.4
fig|1428.368.peg.1048	2	99	MRINTNINSMR		missed R-I@2	0.000267122	1348.67	675.343	1348.67	675.342	2	13	2.1.1.1568.25
fig|1428.368.peg.1048	2	99	MSNAMDR			0.00028937	823.332	412.673	823.332	412.673	2	8	7.1.1.1264.3
fig|1428.368.peg.1048	2	99	MSNAMDRLSSGK		missed R-L@7	0.00520309	1295.6	648.808	1295.6	648.805	2	12	14.1.1.1590.9
fig|1428.368.peg.1048	2	99	NASDDAAGLAIATR		cleaved N-N@N-term	-0.00178307	1344.66	673.338	1344.66	673.339	2	15	3.1.1.1739.17
fig|1428.368.peg.1048	2	99	NGTNTADNQQALQK		cleaved A-N@N-term	-0.0146054	1501.7	751.856	1501.71	751.863	2	11	10.1.1.1397.4
fig|1428.368.peg.1048	2	99	NNASDDAAGLAIATR		cleaved I-N@N-term	-0.00346584	1458.7	730.359	1458.71	730.36	2	24	10.1.1.1705.13
fig|1428.368.peg.1048	2	99	NQLGLDTVNIGSEK		cleaved L-N@N-term	-0.00576083	1486.76	744.386	1486.76	744.389	2	15	11.1.1.1923.15
fig|1428.368.peg.1048	2	99	NQSANGTNTADNQQALQK		cleaved A-N@N-term	-0.00532904	1901.88	634.966	1901.88	634.968	3	16	10.1.1.1423.8
fig|1428.368.peg.1048	2	99	NTQDGMSLIR		cleaved N-N@N-term	0.000340814	1133.55	567.782	1133.55	567.782	2	16	12.1.1.1613.3
fig|1428.368.peg.1048	2	99	PADKADKADAIQAAFNTAITGLTAGTPNTSNPSSAVDSIDAALK		cleaved D-P@N-term; missed K-A@4; missed K-A@7	0.0210357	4299.17	1075.8	4299.15	1075.79	4	28	10.1.1.3482.2
fig|1428.368.peg.1048	2	99	PSSAVDSIDAALK		cleaved N-P@N-term	-0.00184419	1272.65	637.334	1272.66	637.335	2	23	10.1.1.1828.2
fig|1428.368.peg.1048	2	99	PSTFALDVNTAK		cleaved D-P@N-term	9.83977e-05	1262.65	632.333	1262.65	632.333	2	19	10.1.1.1767.10
fig|1428.368.peg.1048	2	99	QISIDLK	Dehydrated(S)@3		-0.000732161	797.464	399.739	797.465	399.74	2	9	12.1.1.1636.2
fig|1428.368.peg.1048	2	99	QLGLDTVNIGSEK	Gln->pyro-Glu@N-term	cleaved N-Q@N-term	-0.00171111	1355.69	678.853	1355.69	678.854	2	21	12.1.1.2415.2
fig|1428.368.peg.1048	2	99	QNQAKMSNAMDR	Gln->pyro-Glu@N-term	missed K-M@5	-0.00469906	1375.59	688.804	1375.6	688.806	2	14	10.1.1.1514.16
fig|1428.368.peg.1048	2	99	QSANGTNTADNQQALQK	Gln->pyro-Glu@N-term	cleaved N-Q@N-term	-0.00283416	1770.81	886.413	1770.81	886.414	2	17	10.1.1.1507.8
fig|1428.368.peg.1048	2	99	QTPQMVSK	Gln->pyro-Glu@N-term	cleaved N-Q@N-term	0.000993957	900.438	451.226	900.438	451.226	2	10	10.1.1.1558.4
fig|1428.368.peg.1048	2	99	RDIANQSANGTNTADNQQALQK		cleaved M-R@N-term; missed R-D@1	-0.00680515	2357.12	786.716	2357.13	786.718	3	23	10.1.1.1479.16
fig|1428.368.peg.1048	2	99	RESGLGVAANNTQDGMSLIR		cleaved A-R@N-term; missed R-E@1	0.00274047	2088.04	697.021	2088.04	697.02	3	25	10.1.1.1796.3
fig|1428.368.peg.1048	2	99	RINNASDDAAGLAIATR		missed R-I@1	-0.00354661	1727.89	864.951	1727.89	864.953	2	29	1.1.1.1536.10
fig|1428.368.peg.1048	2	99	RINTNIN		cleaved M-R@N-term; cleaved N-S@C-term; missed R-I@1	-0.00261032	843.454	422.734	843.456	422.735	2	6	12.1.1.1375.6
fig|1428.368.peg.1048	2	99	RINTNINSMR	Ammonia-loss(N)@7	cleaved M-R@N-term; missed R-I@1	0.00437951	1200.61	401.21	1200.6	401.208	3	15	10.1.1.1529.2
fig|1428.368.peg.1048	2	99	RLDFNVNNLK		cleaved N-R@N-term; missed R-L@1	-0.000299296	1231.67	616.841	1231.67	616.841	2	12	10.1.1.1781.4
fig|1428.368.peg.1048	2	99	SALNSVSNILLR		cleaved D-S@N-term	-0.00155011	1285.73	643.874	1285.74	643.875	2	20	10.1.1.2437.2
fig|1428.368.peg.1048	2	99	SANGTNTADNQQALQK		cleaved Q-S@N-term	-0.00345657	1659.78	554.266	1659.78	554.268	3	13	10.1.1.1412.6
fig|1428.368.peg.1048	2	99	SAVDSIDAALK		cleaved S-S@N-term	-0.00206643	1088.57	545.292	1088.57	545.293	2	15	12.1.1.1768.5
fig|1428.368.peg.1048	2	99	SDDAAGLAIATR		cleaved A-S@N-term	0.00378054	1159.59	580.801	1159.58	580.799	2	16	10.1.1.1682.5
fig|1428.368.peg.1048	2	99	SFDKIK		cleaved E-S@N-term; missed K-I@4	-0.00131893	736.411	369.213	736.412	369.213	2	9	10.1.1.1473.2
fig|1428.368.peg.1048	2	99	SQANQTPQMVSK		cleaved L-S@N-term	-0.01075	1317.62	659.819	1317.63	659.825	2	15	10.1.1.1461.12
fig|1428.368.peg.1048	2	99	SQSASMASAASQIED		cleaved D-A@C-term	0.000338591	1481.63	741.823	1481.63	741.822	2	22	10.1.1.1717.3
fig|1428.368.peg.1048	2	99	SQSASMASAASQIEDADMAK			-0.00574489	1997.86	999.938	1997.87	999.941	2	21	1.1.1.1604.26
fig|1428.368.peg.1048	2	99	SQSASMASAASQIEDADMAKEMSEMTK	Oxidation(M)@18	missed K-E@20	-0.00384398	2850.2	951.074	2850.2	951.075	3	17	2.1.1.1847.13
fig|1428.368.peg.1048	2	99	SVSNILLR		cleaved N-S@N-term	-0.00225201	900.537	451.276	900.539	451.277	2	7	11.1.1.1878.4
fig|1428.368.peg.1048	2	99	TADSALNSVSN		cleaved N-I@C-term	0.00199536	1077.5	539.755	1077.49	539.754	2	18	12.1.1.1471.3
fig|1428.368.peg.1048	2	99	TADSALNSVSNILL		cleaved L-R@C-term	-0.00141972	1416.74	709.38	1416.75	709.38	2	14	11.1.1.2530.2
fig|1428.368.peg.1048	2	99	TADSALNSVSNILLR	Ammonia-loss(N)@7		-0.00125256	1555.82	778.917	1555.82	778.918	2	23	10.1.1.2732.8
fig|1428.368.peg.1048	2	99	TAGTPNTSNPSSAVDSIDAALK		cleaved L-T@N-term	-0.00698227	2116.02	1059.02	2116.03	1059.02	2	25	11.1.1.2033.4
fig|1428.368.peg.1048	2	99	TAITGLTAGTPNTSNPSSAVDSIDAALK		cleaved N-T@N-term	0.00717195	2672.36	891.793	2672.35	891.791	3	26	10.1.1.2635.5
fig|1428.368.peg.1048	2	99	TNTADNQQALQK		cleaved G-T@N-term	-0.00719937	1330.64	666.327	1330.65	666.331	2	15	10.1.1.1381.7
fig|1428.368.peg.1048	2	99	TNVQNVENAFN		cleaved N-D@C-term	-0.00469128	1248.57	625.292	1248.57	625.294	2	17	10.1.1.1795.3
fig|1428.368.peg.1048	2	99	TNVQNVENAFND		cleaved D-Y@C-term	-0.000863365	1363.6	682.807	1363.6	682.807	2	18	10.1.1.1811.2
fig|1428.368.peg.1048	2	99	TNVQNVENAFNDY		cleaved Y-A@C-term	-0.00499098	1526.66	764.337	1526.66	764.339	2	20	11.1.1.2064.3
fig|1428.368.peg.1048	2	99	TNVQNVENAFNDYAVAD		cleaved D-P@C-term	-0.000281268	1882.83	942.424	1882.83	942.424	2	13	11.1.1.2139.10
fig|1428.368.peg.1048	2	99	TNVQNVENAFNDYAVADPADK			0.00417164	2294.05	765.69	2294.05	765.689	3	22	10.1.1.2288.11
fig|1428.368.peg.1048	2	99	TNVQNVENAFNDYAVADPADKADK		missed K-A@21	0.00320123	2608.21	870.41	2608.2	870.409	3	27	10.1.1.2115.3
fig|1428.368.peg.1048	2	99	TNVQNVENAFNDYAVADPADKADKADAIQAAFNTAITGLTAGTPN		cleaved N-T@C-term; missed K-A@21; missed K-A@24	0.00894773	4607.21	1152.81	4607.21	1152.81	4	19	12.1.1.3695.2
fig|1428.368.peg.1048	2	99	TNVQNVENAFNDYAVADPADKADKADAIQAAFNTAITGLTAGTPNTSN		cleaved N-P@C-term; missed K-A@21; missed K-A@24	0.00483498	4909.33	1228.34	4909.33	1228.34	4	19	10.1.1.3677.8
fig|1428.368.peg.1048	2	99	TNVQNVENAFNDYAVADPADKADKADAIQAAFNTAITGLTAGTPNTSNPSSAVDSIDAALK		missed K-A@21; missed K-A@24	0.0186774	6163.99	1233.81	6163.97	1233.8	5	20	10.1.1.3650.3
fig|1428.368.peg.1048	2	99	TPNTSNPSSAVDSIDAALK		cleaved G-T@N-term	-0.00987682	1886.91	944.463	1886.92	944.468	2	23	11.1.1.2026.8
fig|1428.368.peg.1048	2	99	TQDGMSLIR		cleaved N-T@N-term	0.000845176	1019.51	510.761	1019.51	510.761	2	15	12.1.1.1609.5
fig|1428.368.peg.1048	2	99	TQEYMR			-0.00260838	826.362	414.188	826.364	414.189	2	7	16.1.1.1428.4
fig|1428.368.peg.1048	2	99	TSNPSSAVDSIDAALK		cleaved N-T@N-term	-0.0030354	1574.78	788.395	1574.78	788.397	2	23	10.1.1.2020.19
fig|1428.368.peg.1048	2	99	TVASNRATLGATLNR		missed R-A@6	0.00126669	1543.84	515.622	1543.84	515.622	3	20	13.1.1.1414.4
fig|1428.368.peg.1048	2	99	VAANNTQDGMSLIR		cleaved G-V@N-term	-0.00277829	1488.73	745.374	1488.74	745.375	2	20	10.1.1.1726.8
fig|1428.368.peg.1048	2	99	VENAFNDYAVADPADK		cleaved N-V@N-term	-0.0104462	1737.77	869.894	1737.78	869.9	2	18	11.1.1.1915.14
fig|1428.368.peg.1048	2	99	VTLNQLGLDTVNIGSEK		cleaved G-V@N-term	-0.00405767	1799.96	900.987	1799.96	900.989	2	17	10.1.1.2438.14
fig|1428.368.peg.1048	2	99	YAVADPADK		cleaved D-Y@N-term	-0.00370847	948.452	475.233	948.455	475.235	2	10	12.1.1.1431.4
fig|1428.368.peg.1048	1.65758	99	KADAIQAAFNTAITGLTAGTPNTSNPSSAVDSIDAALK		cleaved D-K@N-term; missed K-A@1	5.77867e-05	3701.88	1234.97	3701.87	1234.97	3	22	11.1.1.2690.2
fig|1428.368.peg.1048	1.65758	99	KADKADAIQAAFNTAITGLTAGTPNTSNPSSAVDSIDAALK		cleaved D-K@N-term; missed K-A@1; missed K-A@4	0.0180273	4016.05	1005.02	4016.03	1005.02	4	30	11.1.1.2643.2
fig|1428.368.peg.1048	1.63827	99	QNADPSTFALDVNTAK		cleaved D-Q@N-term	0.00133341	1690.82	846.416	1690.82	846.415	2	21	11.1.1.1931.3
fig|1428.368.peg.1048	1.58503	99	ASQIEDADMAK		cleaved A-A@N-term	0.000147544	1177.53	589.772	1177.53	589.772	2	9	12.1.1.1442.7
fig|1428.368.peg.1048	1.52288	99	RARESGLGVAANNTQDGMSLIRTADSALNSVSNILLR	Oxidation(M)@18	cleaved M-R@N-term; missed R-A@1; missed R-E@3; missed R-T@22	0.0431324	3886.05	972.52	3886.01	972.509	4	12	11.1.1.2313.23
fig|1428.368.peg.1048	1.4318	99	TADNQQALQK		cleaved N-T@N-term	-0.00302375	1115.55	558.784	1115.56	558.786	2	11	14.1.1.1383.3
fig|1428.368.peg.1048	1.36653	99	ISYIADNTEFNDK		cleaved Q-I@N-term	-0.00959819	1528.69	765.355	1528.7	765.36	2	13	11.1.1.1881.15
fig|1428.368.peg.1048	1.18046	93.37	MSNAMDRLSSGKR		missed R-L@7; missed K-R@12	-9.7713e-05	1451.7	484.906	1451.7	484.906	3	6	6.1.1.1370.13
fig|1428.368.peg.1048	0.714443	99	ADKADAIQAAFNTAITGL		cleaved L-T@C-term; missed K-A@3	-1.01392	1788.91	895.461	1789.92	895.968	2	15	11.1.1.2571.2
fig|1428.368.peg.1048	0.659556	78.14	NTNINSMR		cleaved I-N@N-term	0.00244493	948.447	475.231	948.445	475.23	2	9	12.1.1.1380.2
fig|1428.368.peg.1048	0.616185	99	SYIADNTEFNDKTLLKADNSVKIQTLDSADTNKQISIDLKGVTLNQLGLDTVNIGSEK		cleaved I-S@N-term; missed K-T@12; missed K-A@16; missed K-I@22; missed K-Q@33; missed K-G@40	-8.03187	6300.22	1051.04	6308.25	1052.38	6	14	11.1.1.2140.12
fig|1428.368.peg.1048	0.383	99	MSNAMDRLSSGKRINNASDDAAGLAIATR		missed R-L@7; missed K-R@12; missed R-I@13	-9.01728	2996.46	999.827	3005.48	1002.83	3	16	15.1.1.1761.23
fig|1428.368.peg.1048	0.337242	54.03	TLLKADNSVK		missed K-A@4	0.00414946	1087.63	363.55	1087.62	363.549	3	5	14.1.1.1529.4
fig|1428.368.peg.1048	0.253366	99	TADSALNSVSNIL	Dehydrated(S)@8	cleaved L-L@C-term	-0.0049889	1285.65	643.831	1285.65	643.833	2	9	11.1.1.2313.11
fig|1428.368.peg.1048	0.159894	82.05	TNINSMR		cleaved N-T@N-term	-0.000687329	834.401	418.208	834.402	418.208	2	6	14.1.1.1486.5
fig|1428.368.peg.1048	0.130768	98.54	KQISIDLK		cleaved N-K@N-term; missed K-Q@1	0.00241303	943.573	472.794	943.57	472.792	2	11	14.1.1.1641.6
fig|1428.368.peg.1048	0.107349	91.64	ISMLSQANQTPQMVSK		cleaved G-I@N-term	0.00249975	1761.88	881.946	1761.88	881.945	2	10	15.1.1.1794.24
fig|1428.368.peg.1048	0.0452752	69.58	ARESGLGVAAN		cleaved N-N@C-term; missed R-E@2	0.005961	1043.54	522.778	1043.54	522.775	2	6	12.1.1.1404.13
fig|1428.368.peg.1048	0.0296531	54.22	SQIEDADMAK		cleaved A-S@N-term	0.00624635	1106.5	554.256	1106.49	554.253	2	8	12.1.1.1430.6
fig|1428.368.peg.1048	0.0291884	43.97	TNVQNVENAFNDYAVADPADKADKADAIQAAFNTAITGL		cleaved L-T@C-term; missed K-A@21; missed K-A@24	0.0136547	4065.97	1017.5	4065.96	1017.5	4	11	11.1.1.2715.3
fig|1428.368.peg.1048	0.025028	42.45	INNASDDAAGL		cleaved L-A@C-term	0.0027901	1059.49	530.75	1059.48	530.749	2	10	12.1.1.1549.4
fig|1428.368.peg.1048	0.0195421	62.23	KGFIANK		cleaved I-K@N-term; missed K-G@1	-0.000425882	776.454	389.234	776.454	389.235	2	8	15.1.1.1731.2
fig|1428.368.peg.1048	0.00966115	40.56	RTQEYMR		cleaved M-R@N-term; missed R-T@1	0.00428317	982.47	492.242	982.465	492.24	2	7	12.1.1.1299.2
fig|1428.368.peg.1048	0.00877392	24.8	SMASAASQIEDADMAK		cleaved A-S@N-term	0.00857992	1624.72	813.365	1624.71	813.361	2	8	14.1.1.1839.16
fig|1428.368.peg.1048	0.00568285	19.95	NSVSNILLR		cleaved L-N@N-term	-0.0016907	1014.58	508.298	1014.58	508.298	2	7	11.1.1.1920.4
fig|1428.368.peg.1048	0.00524306	48.78	EQISYIADNTE		cleaved E-F@C-term	-0.00786458	1281.56	641.79	1281.57	641.794	2	8	11.1.1.1874.10
fig|1428.368.peg.1048	0.00305075	34.53	ATLGATLNRL		cleaved L-D@C-term; missed R-L@9	-0.0149954	1028.58	515.299	1028.6	515.306	2	9	15.1.1.1838.6
fig|1428.368.peg.1048	0.00305075	22.62	GVTLNQLGLDTVNIG		cleaved G-S@C-term	0.00064452	1512.82	757.415	1512.81	757.415	2	10	11.1.1.2453.5
fig|1428.368.peg.1048	0.00305075	43.16	YAVADPADKADK		cleaved D-Y@N-term; missed K-A@9	-0.00182204	1262.61	421.878	1262.61	421.879	3	7	11.1.1.1593.2
fig|1428.368.peg.1048	0.00217692	33.8	ILNEAGISMLSQANQTPQMVS		cleaved S-K@C-term	0.0104483	2231.1	744.708	2231.09	744.705	3	11	12.1.1.2766.9
fig|1428.368.peg.1048	0.00174066	98.04	SNILLRMRDIANQSANGTNTADNQQALQK	Carbamidomethyl@N-term; Deamidated(N)@16	cleaved V-S@N-term; missed R-M@6; missed R-D@8	-0.0145256	3242.59	1081.87	3242.61	1081.88	3	14	12.1.1.1468.10
fig|1428.368.peg.1048	0.00130484	66.73	EMSEMTKFK	Formyl(K)@7	missed K-F@7	0.000572405	1157.51	579.762	1157.51	579.762	2	10	14.1.1.1764.9
fig|1428.368.peg.1048	0.00130484	97.68	NEAGISMLSQANQTPQMVSKLL	Deamidated(N)@12; Carbamidomethyl(K)@20	cleaved L-N@N-term; cleaved L-Q@C-term; missed K-L@20	0.00126677	2417.19	806.739	2417.19	806.738	3	14	10.1.1.1983.4
fig|1428.368.peg.1048	0.000434512	29.65	ADQNADPSTFALD		cleaved D-V@C-term	-0.0225023	1363.57	682.791	1363.59	682.802	2	10	11.1.1.1959.4
fig|1428.368.peg.1048	0.000434512	85.21	GVAANNTQDGMSLIRTADSALNSVSNILLRMRDIANQSANGTNTADNQQALQK		cleaved L-G@N-term; missed R-T@15; missed R-M@30; missed R-D@32	-2.04956	5568.7	1114.75	5570.76	1115.16	5	14	12.1.1.1461.10
fig|1428.368.peg.1765	2	99	ADDPIFK			-0.00105935	804.401	403.208	804.402	403.208	2	11	16.1.1.1632.2
fig|1428.368.peg.1765	2	99	ADDPIFKGR	Formyl(K)@7	missed K-G@7	-0.000688138	1045.52	523.766	1045.52	523.767	2	11	16.1.1.1687.10
fig|1428.368.peg.1765	2	99	AIAEQAR			-0.00140479	757.407	379.711	757.408	379.711	2	10	16.1.1.1311.4
fig|1428.368.peg.1765	2	99	AKQTLVK		missed K-Q@2	-0.00150397	786.495	394.255	786.496	394.255	2	10	16.1.1.1228.2
fig|1428.368.peg.1765	2	99	AQAITELQGIQAAIR			-0.0024214	1581.88	791.948	1581.88	791.949	2	26	13.1.1.2019.2
fig|1428.368.peg.1765	2	99	AVNALFK			-0.00297102	761.441	381.728	761.444	381.729	2	11	14.1.1.1719.2
fig|1428.368.peg.1765	2	99	AVNALFKSDAK		missed K-S@7	-5.75124e-05	1162.63	582.325	1162.63	582.325	2	11	18.1.1.1640.22
fig|1428.368.peg.1765	2	99	AVQAAQSAIQALFTDQNQTR			0.00351338	2160.1	721.039	2160.09	721.038	3	22	13.1.1.2328.3
fig|1428.368.peg.1765	2	99	CEWGESGELFADELGPVR	Carbamidomethyl(C)@1		-0.000934039	2049.91	1025.96	2049.91	1025.96	2	23	17.1.1.2227.2
fig|1428.368.peg.1765	2	99	DAACNWEK	Carbamidomethyl(C)@4		-0.000727484	992.401	497.208	992.402	497.208	2	11	16.1.1.1514.5
fig|1428.368.peg.1765	2	99	DAACNWEKNPNNPQLK	Carbamidomethyl(C)@4	missed K-N@8	0.00404132	1897.88	949.946	1897.87	949.944	2	16	13.1.1.1431.26
fig|1428.368.peg.1765	2	99	DAACNWEKNPNNPQLKETVR	Carbamidomethyl(C)@4	missed K-N@8; missed K-E@16	-0.00248006	2383.13	795.384	2383.13	795.385	3	14	16.1.1.1635.22
fig|1428.368.peg.1765	2	99	DFVSSPTR			-0.00102755	907.439	454.727	907.44	454.727	2	11	17.1.1.1569.2
fig|1428.368.peg.1765	2	99	DLIIDGGYQGER			0.000619968	1334.65	668.331	1334.65	668.331	2	16	13.1.1.1597.11
fig|1428.368.peg.1765	2	99	DLIIDGGYQGERGTK		missed R-G@12	-0.00623243	1620.8	541.275	1620.81	541.278	3	12	16.1.1.1698.5
fig|1428.368.peg.1765	2	99	DLIIDGGYQGERGTKK		missed R-G@12; missed K-K@15	-0.000971429	1748.9	438.233	1748.91	438.234	4	11	16.1.1.1619.5
fig|1428.368.peg.1765	2	99	DQYYNNNEYEILDHGR		cleaved M-D@N-term	0.0017606	2041.88	681.633	2041.88	681.633	3	15	17.1.1.1832.12
fig|1428.368.peg.1765	2	99	DQYYNNNEYEILDHGRR		cleaved M-D@N-term; missed R-R@16	0.00391237	2197.98	550.503	2197.98	550.502	4	12	17.1.1.1771.7
fig|1428.368.peg.1765	2	99	EGAGEGYVTISDGTEDNTETVK			0.00157767	2271	1136.51	2271	1136.51	2	21	13.1.1.1544.5
fig|1428.368.peg.1765	2	99	ELEVFVQR			0.000800733	1018.55	510.28	1018.54	510.28	2	11	17.1.1.1829.5
fig|1428.368.peg.1765	2	99	ERNMTNQPSEVSGTNAYPGNNNR	Deamidated(N)@3; Deamidated(N)@20	missed R-N@2	0.00259429	2551.1	851.375	2551.1	851.374	3	24	16.1.1.1588.10
fig|1428.368.peg.1765	2	99	ETLPVTLPVGSEDR			-0.00205542	1511.78	756.898	1511.78	756.899	2	15	14.1.1.1930.12
fig|1428.368.peg.1765	2	99	ETLPVTLPVGSEDRYLPVGNVWHVTNQLFSSGGASVVTGWLFR		missed R-Y@14	0.0274342	4684.43	1172.12	4684.41	1172.11	4	24	18.1.1.4195.2
fig|1428.368.peg.1765	2	99	ETVRTQFVATNTILYNR		missed R-T@4	-0.000437054	2025.06	676.029	2025.06	676.029	3	15	17.1.1.1845.13
fig|1428.368.peg.1765	2	99	FTAGVETPR			-0.00160939	976.496	489.255	976.498	489.256	2	15	16.1.1.1573.5
fig|1428.368.peg.1765	2	99	GFVGNSKELEVFVQR	Deamidated(N)@5	missed K-E@7	0.00107827	1708.88	570.634	1708.88	570.633	3	24	16.1.1.2430.2
fig|1428.368.peg.1765	2	99	GMEPDLLSAIPVFWDIN		cleaved N-S@C-term	0.00847173	1915.95	958.981	1915.94	958.977	2	15	16.1.1.5300.2
fig|1428.368.peg.1765	2	99	GMEPDLLSAIPVFWDINSSYN		cleaved N-S@C-term	0.0113403	2367.12	790.048	2367.11	790.044	3	17	16.1.1.5194.2
fig|1428.368.peg.1765	2	99	GMEPDLLSAIPVFWDINSSYNSSSGLPCR	Carbamidomethyl(C)@28		0.0136629	3211.51	1071.51	3211.5	1071.51	3	23	16.1.1.4570.2
fig|1428.368.peg.1765	2	99	GMNSVCETCDPNCMPEIPSGGSICDRPSQYGNR	Carbamidomethyl(C)@6; Carbamidomethyl(C)@9; Carbamidomethyl(C)@13; Carbamidomethyl(C)@24		0.0111393	3744.53	937.139	3744.52	937.136	4	19	17.1.1.1872.10
fig|1428.368.peg.1765	2	99	GPGSTGGDLVK			0.000670987	986.504	494.259	986.503	494.259	2	12	14.1.1.1521.5
fig|1428.368.peg.1765	2	99	GPGSTGGDLVKLPVPEGR		missed K-L@11	-0.00113828	1734.93	579.316	1734.93	579.316	3	26	16.1.1.1807.2
fig|1428.368.peg.1765	2	99	GSETSLLTAYVEAATLHLGLLK			0.00273483	2286.25	763.091	2286.25	763.09	3	23	13.1.1.3821.2
fig|1428.368.peg.1765	2	99	GYITYGNASVVK			-0.0194914	1270.64	636.325	1270.66	636.335	2	11	10.1.1.1713.19
fig|1428.368.peg.1765	2	99	GYITYGNASVVKGPGSTGGDLVK		missed K-G@12	0.00629968	2239.15	747.392	2239.15	747.39	3	19	18.1.1.1818.9
fig|1428.368.peg.1765	2	99	IDESKLKPYTR		missed K-L@5	0.00217085	1348.74	675.376	1348.74	675.375	2	15	16.1.1.1522.15
fig|1428.368.peg.1765	2	99	IEFIPIEGTLEEYQANQDLEK			0.00701955	2478.22	827.082	2478.22	827.079	3	24	17.1.1.2457.3
fig|1428.368.peg.1765	2	99	IGNASVLVLSNWSANLSQNVCVNPAHGYILR	Carbamidomethyl(C)@21		-0.00257452	3365.73	1122.92	3365.73	1122.92	3	18	16.1.1.3352.2
fig|1428.368.peg.1765	2	99	IGTTDGVANIDNLEVIEANPLTGEALAR			0.0109576	2865.48	956.168	2865.47	956.165	3	24	14.1.1.2921.2
fig|1428.368.peg.1765	2	99	IHIYNEGGGDLILDK			0.000186718	1655.85	552.958	1655.85	552.958	3	23	16.1.1.1908.2
fig|1428.368.peg.1765	2	99	IHIYNEGGGDLILDKIEFIPIEGTLEEYQANQDLEK		missed K-I@15	0.013052	4116.07	1030.03	4116.06	1030.02	4	29	16.1.1.3627.3
fig|1428.368.peg.1765	2	99	IPYVYHPFLQGSLPAVPGETYDIFQQLSNAIGK			0.0169946	3661.9	916.482	3661.88	916.478	4	21	16.1.1.4311.2
fig|1428.368.peg.1765	2	99	ITQIPAVK		cleaved M-I@N-term	0.00124848	868.539	435.277	868.538	435.276	2	13	16.1.1.1604.2
fig|1428.368.peg.1765	2	99	KAVNALFK		missed K-A@1	0.000509004	889.539	445.777	889.539	445.777	2	12	16.1.1.1561.2
fig|1428.368.peg.1765	2	99	KAVNALFKSDAK		missed K-A@1; missed K-S@8	0.00195528	1290.73	431.251	1290.73	431.25	3	10	16.1.1.1526.4
fig|1428.368.peg.1765	2	99	KEGAGEGYVTISDGTEDN		cleaved N-T@C-term; missed K-E@1	0.00178589	1840.8	921.406	1840.8	921.405	2	20	16.1.1.1666.26
fig|1428.368.peg.1765	2	99	KEGAGEGYVTISDGTEDNTETVK		missed K-E@1	0.00185051	2399.1	800.707	2399.1	800.706	3	22	13.1.1.1467.25
fig|1428.368.peg.1765	2	99	KEGAGEGYVTISDGTEDNTETVKFTAGVETPR		missed K-E@1; missed K-F@23	-0.00619614	3357.58	840.402	3357.58	840.404	4	19	17.1.1.1868.5
fig|1428.368.peg.1765	2	99	KETLPVTLPVGSEDR		missed K-E@1	-0.000982388	1639.88	547.633	1639.88	547.633	3	18	14.1.1.1835.4
fig|1428.368.peg.1765	2	99	LESIELIR			-0.00579718	971.559	486.787	971.565	486.79	2	13	13.1.1.1631.3
fig|1428.368.peg.1765	2	99	LPVPEGR			0.000449369	766.434	384.224	766.434	384.224	2	9	16.1.1.1529.3
fig|1428.368.peg.1765	2	99	LQGSLPAVPGETYDIFQQLSNAIGK		cleaved F-L@N-term	0.00640855	2645.38	882.799	2645.37	882.797	3	23	17.1.1.3116.2
fig|1428.368.peg.1765	2	99	LRPDITLNHILHAETLVQK			0.00550538	2210.26	553.572	2210.25	553.571	4	29	16.1.1.2292.2
fig|1428.368.peg.1765	2	99	LSYVGLGMLNSDYR			0.000231804	1586.78	794.395	1586.78	794.395	2	25	16.1.1.2587.2
fig|1428.368.peg.1765	2	99	LSYVGLGMLNSDYRDFVSSPTR		missed R-D@14	0.000475998	2476.21	826.409	2476.21	826.409	3	21	16.1.1.2920.2
fig|1428.368.peg.1765	2	99	LTQSDMR			0.000754841	849.402	425.708	849.401	425.708	2	9	16.1.1.1386.2
fig|1428.368.peg.1765	2	99	LTQSDMRSPIQEGYKER		missed R-S@7; missed K-E@15	0.00114489	2037	510.256	2036.99	510.256	4	10	16.1.1.1594.15
fig|1428.368.peg.1765	2	99	LVECMSDEIYPQEK	Carbamidomethyl(C)@4		0.00104438	1739.78	870.895	1739.77	870.895	2	18	9.1.1.1620.13
fig|1428.368.peg.1765	2	99	LYEVPTK			-0.00319592	848.461	425.238	848.464	425.239	2	8	16.1.1.1583.4
fig|1428.368.peg.1765	2	99	LYEVPTKSQLTR		missed K-S@7	0.0020771	1433.79	478.937	1433.79	478.937	3	17	16.1.1.1631.4
fig|1428.368.peg.1765	2	99	LYRDAACNWEK	Carbamidomethyl(C)@7	missed R-D@3	0.00161312	1424.65	475.891	1424.65	475.891	3	9	18.1.1.1627.7
fig|1428.368.peg.1765	2	99	LYRDAACNWEKNPNNPQLK	Carbamidomethyl(C)@7	missed R-D@3; missed K-N@11	0.00382399	2330.13	583.539	2330.12	583.538	4	15	16.1.1.1650.9
fig|1428.368.peg.1765	2	99	MCLLDLVK	Carbamidomethyl(C)@2		-0.00415032	990.52	496.267	990.524	496.269	2	13	16.1.1.2696.2
fig|1428.368.peg.1765	2	99	MDQYYNNNEYEILDHGR			-0.00413864	2172.91	725.312	2172.92	725.313	3	21	16.1.1.1868.3
fig|1428.368.peg.1765	2	99	MDQYYNNNEYEILDHGRR		missed R-R@17	0.00496756	2329.02	583.263	2329.02	583.262	4	21	16.1.1.1751.5
fig|1428.368.peg.1765	2	99	MDSYVSTSLMTAQNGSPLSGYVTK	Deamidated(N)@14		0.00504975	2537.17	846.731	2537.17	846.729	3	22	16.1.1.2615.2
fig|1428.368.peg.1765	2	99	MMTAAEQITNK			-0.00121204	1236.58	619.299	1236.58	619.299	2	14	14.1.1.1654.24
fig|1428.368.peg.1765	2	99	MMTAAEQITNKAIAEQAR	Deamidated(N)@10	missed K-A@11	0.00232659	1976.97	659.997	1976.97	659.996	3	20	16.1.1.1699.6
fig|1428.368.peg.1765	2	99	MPYFSAR			0.000816116	870.407	436.211	870.406	436.21	2	11	16.1.1.1719.2
fig|1428.368.peg.1765	2	99	NEYEILDHGR		cleaved N-N@N-term	0.000795259	1244.58	623.297	1244.58	623.297	2	12	16.1.1.1639.8
fig|1428.368.peg.1765	2	99	NGDFSAGLSNWQGAEGALVQK			0.0102492	2148.03	717.019	2148.02	717.015	3	24	17.1.1.2063.5
fig|1428.368.peg.1765	2	99	NLGIWVGFK		cleaved Q-N@N-term	-0.00134113	1032.57	517.294	1032.58	517.295	2	15	18.1.1.2476.2
fig|1428.368.peg.1765	2	99	NMNVPYGIPPTNPCDR	Carbamidomethyl(C)@14		-0.00103425	1843.83	922.924	1843.83	922.925	2	15	17.1.1.1851.17
fig|1428.368.peg.1765	2	99	NMNVPYGIPPTNPCDRDYQR	Carbamidomethyl(C)@14	missed R-D@16	0.00277244	2406.09	803.036	2406.08	803.035	3	14	13.1.1.1592.9
fig|1428.368.peg.1765	2	99	NMTMAVLDIVAVWPTFDIK			0.00565103	2163.12	1082.57	2163.11	1082.56	2	21	17.1.1.3700.2
fig|1428.368.peg.1765	2	99	NMTNQPSEVSGTNAYPGNNNR			0.00973328	2264	755.673	2263.99	755.67	3	16	13.1.1.1410.25
fig|1428.368.peg.1765	2	99	NNEYEILDHGR		cleaved N-N@N-term	0.00725528	1358.63	680.322	1358.62	680.318	2	10	16.1.1.1649.17
fig|1428.368.peg.1765	2	99	NPNNPQLK			-0.00365041	923.479	462.747	923.482	462.749	2	11	17.1.1.1367.3
fig|1428.368.peg.1765	2	99	NPNNPQLKETVR		missed K-E@8	-0.00205102	1408.74	705.377	1408.74	705.378	2	12	16.1.1.1469.16
fig|1428.368.peg.1765	2	99	NTLQLNVTDYLVDQAAK			0.00300701	1904.99	953.501	1904.98	953.499	2	23	16.1.1.2812.4
fig|1428.368.peg.1765	2	99	NVLRNGDFSAGLSNWQGAEGALVQK	Deamidated(N)@5	missed R-N@4	0.00858216	2631.31	878.111	2631.3	878.109	3	29	16.1.1.2544.2
fig|1428.368.peg.1765	2	99	NYQSESFGITPYSDETTMMNGPSNNYEASAYR	Deamidated(N)@20		0.00394427	3624.5	1209.17	3624.49	1209.17	3	22	17.1.1.2061.2
fig|1428.368.peg.1765	2	99	PGTPQAQISWDK		cleaved D-P@N-term	0.000910089	1326.66	664.336	1326.66	664.336	2	20	16.1.1.1710.6
fig|1428.368.peg.1765	2	99	PVFWDINSSYNSSSGLPCR	Carbamidomethyl(C)@18	cleaved I-P@N-term	-5.97146	2179.02	1090.52	2184.99	1093.5	2	23	18.1.1.3637.2
fig|1428.368.peg.1765	2	99	SDAKNTLQLNVTDYLVDQAAK		missed K-N@4	-0.00012617	2306.18	769.732	2306.18	769.732	3	28	17.1.1.2079.4
fig|1428.368.peg.1765	2	99	SDYRDFVSSPTR		cleaved N-S@N-term; missed R-D@4	0.00137655	1428.66	477.229	1428.66	477.228	3	16	16.1.1.1665.3
fig|1428.368.peg.1765	2	99	SKELEVFVQR		cleaved N-S@N-term; missed K-E@2	-0.00394603	1233.67	412.23	1233.67	412.231	3	13	16.1.1.1688.2
fig|1428.368.peg.1765	2	99	SPIQEGYK			-0.000886345	920.459	461.237	920.46	461.237	2	13	16.1.1.1482.4
fig|1428.368.peg.1765	2	99	SPIQEGYKER		missed K-E@8	0.00194482	1205.61	402.876	1205.6	402.875	3	10	13.1.1.1291.5
fig|1428.368.peg.1765	2	99	SPIQEGYKERNMTNQPSEVSGTNAYPGNNNR	Deamidated(N)@28	missed K-E@8; missed R-N@10	0.00785839	3452.57	1151.87	3452.57	1151.86	3	14	16.1.1.1641.15
fig|1428.368.peg.1765	2	99	SSYNSSSGLPCR	Carbamidomethyl(C)@11	cleaved N-S@N-term	0.000253725	1313.57	657.791	1313.57	657.791	2	13	16.1.1.1536.13
fig|1428.368.peg.1765	2	99	TAALGIPFTHPFNDTSLIK			0.00201432	2042.09	681.702	2042.08	681.702	3	18	14.1.1.2383.2
fig|1428.368.peg.1765	2	99	TGLQQQYNTGDWNK		cleaved N-T@N-term	-0.00208639	1651.76	826.886	1651.76	826.887	2	21	16.1.1.1702.9
fig|1428.368.peg.1765	2	99	THPFNDTSLIK		cleaved F-T@N-term	-0.000162537	1271.65	424.891	1271.65	424.891	3	12	17.1.1.1703.3
fig|1428.368.peg.1765	2	99	TLQLNVTDYLVDQAAK		cleaved N-T@N-term	0.000323001	1790.94	896.478	1790.94	896.478	2	22	16.1.1.2811.6
fig|1428.368.peg.1765	2	99	TQFVATNTILYNR			-0.00159391	1539.8	770.909	1539.8	770.91	2	21	13.1.1.1690.3
fig|1428.368.peg.1765	2	99	TSSNVSVR			-0.00127269	848.434	425.224	848.435	425.225	2	9	13.1.1.1181.3
fig|1428.368.peg.1765	2	99	TVEIFPETNHVCIEIGETAGTFK	Carbamidomethyl(C)@12		0.00039219	2591.26	864.76	2591.26	864.76	3	16	17.1.1.2118.5
fig|1428.368.peg.1765	2	99	TVYTPLEGNVGGNWLSPEPVPSIDVIEGNIVDTPGLFK			0.0135657	4023.07	1006.77	4023.05	1006.77	4	23	14.1.1.3901.3
fig|1428.368.peg.1765	2	99	TYPVLTNQTIPQDMACDSCDAGTVMR	Carbamidomethyl(C)@16; Carbamidomethyl(C)@19		0.00179364	2943.29	982.104	2943.29	982.103	3	23	16.1.1.2394.2
fig|1428.368.peg.1765	2	99	VTARKEGAGEGYVTISDGTEDNTETVK		missed R-K@4; missed K-E@5	0.0163815	2826.37	707.599	2826.35	707.595	4	16	16.1.1.1622.19
fig|1428.368.peg.1765	2	99	VTDYLVDQAAK		cleaved N-V@N-term	-0.00291226	1221.62	611.818	1221.62	611.819	2	16	15.1.1.1712.14
fig|1428.368.peg.1765	2	99	WLHNISFEAIDGGVNTSVIK			0.00153243	2199.13	734.052	2199.13	734.051	3	25	16.1.1.2613.2
fig|1428.368.peg.1765	2	99	WQGAEGALVQK		cleaved N-W@N-term	-0.00297135	1185.61	593.813	1185.61	593.814	2	15	16.1.1.1662.2
fig|1428.368.peg.1765	2	99	WYNTGLQQQYNTGDWNK			-0.00517601	2114.94	1058.48	2114.94	1058.48	2	23	16.1.1.2039.2
fig|1428.368.peg.1765	2	99	YAAYIGYGWTHVSADENNQIYPNMITQIPAVK			0.0114641	3626.76	1209.93	3626.75	1209.92	3	20	17.1.1.2347.2
fig|1428.368.peg.1765	2	99	YASNADVNVFCTLQK	Carbamidomethyl(C)@11		-0.00236938	1728.81	865.413	1728.81	865.414	2	24	16.1.1.2095.2
fig|1428.368.peg.1765	2	99	YDKEIHK		missed K-E@3	-0.000598916	931.476	466.745	931.476	466.745	2	9	13.1.1.1112.2
fig|1428.368.peg.1765	2	99	YDKEIHKNMNVPYGIPPTNPCDRDYQR	Carbamidomethyl(C)@21	missed K-E@3; missed K-N@7; missed R-D@23	0.0203908	3319.57	554.269	3319.55	554.266	6	17	16.1.1.1692.4
fig|1428.368.peg.1765	2	99	YGDFDSDNWSGENGWK	Deamidated(N)@13		-0.000374278	1876.72	939.366	1876.72	939.366	2	26	16.1.1.2236.2
fig|1428.368.peg.1765	2	99	YGDFDSDNWSGENGWKTSSNVSVR	Deamidated(N)@13	missed K-T@16	0.000546534	2707.14	903.388	2707.14	903.388	3	16	17.1.1.1921.11
fig|1428.368.peg.1765	2	99	YLHMPGANIPQFSDTVFPTYAYQK			0.00903866	2787.35	930.122	2787.34	930.12	3	21	15.1.1.2608.13
fig|1428.368.peg.1765	2	99	YLPVGNVWHVTNQLFSSGGASVVTGWLFR			0.0116257	3190.65	1064.56	3190.64	1064.55	3	22	17.1.1.3201.2
fig|1428.368.peg.1765	2	99	YPLAQAPGSVLQNMDYK			0.000617758	1893.93	947.972	1893.93	947.972	2	23	16.1.1.2354.2
fig|1428.368.peg.1765	2	99	YPLAQAPGSVLQNMDYKELMNK		missed K-E@17	0.00279161	2509.24	837.42	2509.23	837.419	3	26	16.1.1.2601.2
fig|1428.368.peg.1765	1.85387	98.68	SLYGQRNVLR		missed R-N@6	-0.0033478	1204.66	603.339	1204.67	603.341	2	8	16.1.1.1580.18
fig|1428.368.peg.1765	1.82391	98.57	SLYGQR			-0.00110546	722.37	362.192	722.371	362.193	2	6	13.1.1.1274.2
fig|1428.368.peg.1765	1.69897	99	GFVGNSK	Deamidated(N)@5		-0.00188603	708.342	355.178	708.344	355.179	2	9	16.1.1.1420.2
fig|1428.368.peg.1765	1.4437	99	YAAYIGYGWTHVSADENNQIYPN		cleaved N-M@C-term	0.00707914	2645.19	882.737	2645.18	882.735	3	13	17.1.1.2102.4
fig|1428.368.peg.1765	1.25964	99	GPSNNYEASAYR		cleaved N-G@N-term	0.00286222	1327.58	664.798	1327.58	664.797	2	9	16.1.1.1537.11
fig|1428.368.peg.1765	1.10237	99	MITQIPAVK		cleaved N-M@N-term	-0.00127878	999.577	500.796	999.579	500.797	2	14	17.1.1.1759.4
fig|1428.368.peg.1765	1.03152	98.71	SPIQEGYKERN		cleaved N-M@C-term; missed K-E@8; missed R-N@10	0.00124026	1319.65	440.89	1319.65	440.89	3	9	18.1.1.1479.5
fig|1428.368.peg.1765	0.886057	98.84	AVQAAQSAIQAL		cleaved L-F@C-term	-0.000799018	1169.64	585.827	1169.64	585.828	2	16	17.1.1.1914.3
fig|1428.368.peg.1765	0.818156	98.42	WYNTGLQQQYN		cleaved N-T@C-term	-0.00149662	1413.63	707.822	1413.63	707.823	2	16	17.1.1.1858.7
fig|1428.368.peg.1765	0.728158	98.71	SANLSQNVCVNPAHGYILR	Carbamidomethyl(C)@9	cleaved W-S@N-term	0.00374865	2112.06	705.026	2112.05	705.025	3	17	17.1.1.1841.6
fig|1428.368.peg.1765	0.642065	99	TVYTPLEGNVGGN		cleaved N-W@C-term	0.000782826	1319.64	660.826	1319.64	660.825	2	18	17.1.1.1846.11
fig|1428.368.peg.1765	0.61261	97.07	VATNTILYNR		cleaved F-V@N-term	-0.00160608	1163.63	582.821	1163.63	582.822	2	8	17.1.1.1693.12
fig|1428.368.peg.1765	0.531653	71.48	FTAGVETPRLTQSDMR		missed R-L@9	0.0016106	1807.89	603.637	1807.89	603.637	3	10	18.1.1.1728.10
fig|1428.368.peg.1765	0.531653	95.99	MTAAEQITNK		cleaved M-M@N-term	-0.00264353	1105.54	553.778	1105.54	553.779	2	10	17.1.1.1536.7
fig|1428.368.peg.1765	0.442493	99	YLPVGNVWHVTN		cleaved N-Q@C-term	0.00101396	1397.71	699.862	1397.71	699.862	2	18	17.1.1.1985.2
fig|1428.368.peg.1765	0.438899	97.76	HILHAETLVQK		cleaved N-H@N-term	-0.00345734	1287.73	430.249	1287.73	430.251	3	15	18.1.1.1567.4
fig|1428.368.peg.1765	0.387216	96.52	ADVNVFCTLQK	Carbamidomethyl(C)@7	cleaved N-A@N-term	-0.00185463	1293.64	647.826	1293.64	647.827	2	12	17.1.1.1890.10
fig|1428.368.peg.1765	0.383	59.68	LKPYTR			-0.000735599	776.454	389.234	776.454	389.235	2	6	18.1.1.1395.2
fig|1428.368.peg.1765	0.379864	59.36	YDKEIHKNMNVPYGIPPTNPCDR	Carbamidomethyl(C)@21	missed K-E@3; missed K-N@7	0.00786922	2757.31	690.334	2757.3	690.332	4	10	18.1.1.1730.15
fig|1428.368.peg.1765	0.276544	48.21	TSSNVSVRADDPIFK		missed R-A@8	-0.00852488	1634.82	818.416	1634.83	818.42	2	7	18.1.1.1720.20
fig|1428.368.peg.1765	0.248721	93.41	IATYTNHCTR	Carbamidomethyl(C)@8	cleaved N-I@N-term	0.00103115	1235.57	412.865	1235.57	412.865	3	11	17.1.1.1402.2
fig|1428.368.peg.1765	0.236572	96.75	SICDRPSQYGNR	Carbamidomethyl(C)@3	cleaved G-S@N-term	-0.00173884	1451.66	484.892	1451.66	484.893	3	11	17.1.1.1489.9
fig|1428.368.peg.1765	0.17134	95.04	IGNASVLVLSN		cleaved N-W@C-term	-0.00180529	1085.61	543.81	1085.61	543.811	2	12	17.1.1.1929.4
fig|1428.368.peg.1765	0.164309	32.49	LTQSDMRSPIQEGYK		missed R-S@7	-0.00171837	1751.85	584.957	1751.85	584.958	3	8	17.1.1.1668.7
fig|1428.368.peg.1765	0.153045	77.86	SSSGLPCR	Carbamidomethyl(C)@7	cleaved N-S@N-term	0.000158542	862.397	432.206	862.397	432.206	2	8	16.1.1.1424.2
fig|1428.368.peg.1765	0.133713	79.45	IPYVYHPF		cleaved F-L@C-term	0.000331698	1034.52	518.269	1034.52	518.269	2	11	17.1.1.1948.2
fig|1428.368.peg.1765	0.103474	87.58	LRPDITLN		cleaved N-H@C-term	-0.000383116	940.534	471.274	940.534	471.274	2	8	17.1.1.1748.5
fig|1428.368.peg.1765	0.101824	21.65	RLSQAR		missed R-L@1	0.0121023	729.437	365.726	729.425	365.72	2	4	4.1.1.1531.4
fig|1428.368.peg.1765	0.0695604	90.94	WYNTGLQQQY		cleaved Y-N@C-term	0.000509424	1299.59	650.802	1299.59	650.801	2	12	17.1.1.1909.6
fig|1428.368.peg.1765	0.0680339	80.11	NIATYTNHCTR	Carbamidomethyl(C)@9	cleaved N-N@N-term	-0.00133346	1349.61	450.878	1349.61	450.879	3	11	17.1.1.1496.3
fig|1428.368.peg.1765	0.0584886	78.08	TVEIFPETN		cleaved N-H@C-term	0.00117013	1048.51	525.262	1048.51	525.261	2	11	17.1.1.1919.3
fig|1428.368.peg.1765	0.0510982	70.44	VPYGIPPTNPCDRDYQR	Carbamidomethyl(C)@11	cleaved N-V@N-term; missed R-D@13	-0.00125931	2046.96	683.326	2046.96	683.327	3	11	18.1.1.1732.12
fig|1428.368.peg.1765	0.0472076	71.91	IMPGYER		cleaved N-I@N-term	-0.00139006	864.415	433.215	864.416	433.215	2	6	17.1.1.1565.3
fig|1428.368.peg.1765	0.0338583	70.18	PLTGEALAR		cleaved N-P@N-term	-0.00233465	926.516	464.265	926.519	464.267	2	10	17.1.1.1614.5
fig|1428.368.peg.1765	0.0268721	73.87	IDESKL		cleaved L-K@C-term; missed K-L@5	-0.00136651	703.374	352.694	703.375	352.695	2	5	15.1.1.1471.2
fig|1428.368.peg.1765	0.0264104	97.78	FGLQWGMDPSIVNVYYGYLTNNIATYTNHCTR	Carbamidomethyl(D)@8; Carbamidomethyl(C)@30		0.020947	3824.79	957.205	3824.77	957.2	4	17	17.1.1.2780.2
fig|1428.368.peg.1765	0.0190881	85.75	IQEGYKER		cleaved P-I@N-term; missed K-E@6	-0.0015933	1021.52	511.766	1021.52	511.767	2	8	17.1.1.1478.6
fig|1428.368.peg.1765	0.0186345	17.54	PEIPSGGSICDRPSQYGNR	Carbamidomethyl(C)@10	cleaved M-P@N-term	0.00330699	2088.97	697.33	2088.96	697.329	3	6	18.1.1.1688.20
fig|1428.368.peg.1765	0.0101054	86.23	TVEIFPETNHV		cleaved V-C@C-term	0.000178621	1284.64	643.325	1284.64	643.325	2	11	17.1.1.1883.7
fig|1428.368.peg.1765	0.00877392	49.5	TAQNGSPLSGYVTK	Deamidated(N)@4	cleaved M-T@N-term	-0.00641841	1422.69	712.354	1422.7	712.357	2	8	17.1.1.1759.10
fig|1428.368.peg.1765	0.00261362	63.28	LLDLVK		cleaved C-L@N-term	-0.0015333	699.452	350.733	699.453	350.734	2	7	11.1.1.1822.2
fig|1428.368.peg.1765	0.00217692	26.21	NPLTGEALAR		cleaved A-N@N-term	-0.00256302	1040.56	521.287	1040.56	521.288	2	8	16.1.1.1654.6
fig|1428.368.peg.1765	0.000434512	21.79	PNCMPEIPSGGSICDRPSQYGNR	Carbamidomethyl@N-term; Carbamidomethyl(C)@3; Carbamidomethyl(C)@14	cleaved D-P@N-term	-0.00045224	2648.15	663.045	2648.15	663.046	4	9	17.1.1.1666.13
fig|11428.3.peg.2649	2	99	AAVEEGIVAGGGTSLMNVYTK			-0.00253452	2066.03	1034.02	2066.04	1034.03	2	25	1.1.1.1993.3
fig|11428.3.peg.2649	2	99	AKDIKFSEEARR		cleaved M-A@N-term; missed K-D@2; missed K-F@5; missed R-R@11	-0.000717151	1448.77	483.932	1448.77	483.932	3	12	2.1.1.1406.6
fig|11428.3.peg.2649	2	99	ALEEPVR			-0.000140265	812.439	407.227	812.439	407.227	2	8	13.1.1.1326.3
fig|11428.3.peg.2649	2	99	AMLEDIAILTGGEVITEELGR			0.000374484	2229.16	744.059	2229.16	744.059	3	27	1.1.1.3271.2
fig|11428.3.peg.2649	2	99	APGFGDR			-0.00148808	718.339	360.176	718.34	360.177	2	9	2.1.1.1448.4
fig|11428.3.peg.2649	2	99	AQLEETTSEFDR			-0.00135462	1424.64	713.328	1424.64	713.328	2	16	1.1.1.1533.22
fig|11428.3.peg.2649	2	99	AQLEETTSEFDREK		missed R-E@12	-0.000783813	1681.78	841.897	1681.78	841.897	2	15	1.1.1.1454.26
fig|11428.3.peg.2649	2	99	AQLEETTSEFDREKLQER		missed R-E@12; missed K-L@14	0.0001603	2208.07	1105.04	2208.07	1105.04	2	15	1.1.1.1529.26
fig|11428.3.peg.2649	2	99	AVTAAIEELK			0.000146618	1043.59	522.801	1043.59	522.8	2	17	2.1.1.1733.5
fig|11428.3.peg.2649	2	99	AVTAAIEELKTISKPIEGK		missed K-T@10	0.00251671	1997.14	666.722	1997.14	666.721	3	23	6.1.1.1839.2
fig|11428.3.peg.2649	2	99	DLKSATVESLGR		missed K-S@3	0.998744	1275.68	426.235	1274.68	425.902	3	13	3.1.1.1669.3
fig|11428.3.peg.2649	2	99	EGLKNVTAGANPMGLR		missed K-N@4	-0.00269244	1626.85	814.432	1626.85	814.433	2	22	1.1.1.1588.10
fig|11428.3.peg.2649	2	99	EGLKNVTAGANPMGLRK		missed K-N@4; missed R-K@16	0.00120013	1754.95	585.99	1754.95	585.989	3	17	1.1.1.1528.15
fig|11428.3.peg.2649	2	99	EIELEDAFENMGAK			-0.00590981	1594.71	798.364	1594.72	798.367	2	24	1.1.1.2093.2
fig|11428.3.peg.2649	2	99	ENTTVVEGVGSTEQIEAR			-0.00783073	1917.92	959.967	1917.93	959.971	2	19	1.1.1.1604.25
fig|11428.3.peg.2649	2	99	FGSPLITNDGVTIAK			-0.00028932	1531.82	766.919	1531.82	766.92	2	25	1.1.1.1817.2
fig|11428.3.peg.2649	2	99	FGSPLITNDGVTIAKEIELEDAFENMGAK		missed K-E@15	0.00561513	3108.54	778.142	3108.53	778.14	4	28	6.1.1.2271.3
fig|11428.3.peg.2649	2	99	FSEEAR			-0.000157331	737.334	369.674	737.334	369.674	2	7	1.1.1.1266.2
fig|11428.3.peg.2649	2	99	FSEEARR		missed R-R@6	0.00100579	893.437	447.726	893.436	447.725	2	7	13.1.1.1181.4
fig|11428.3.peg.2649	2	99	GAATETELKER		cleaved V-G@N-term; missed K-E@9	0.00157379	1203.61	602.813	1203.61	602.812	2	10	3.1.1.1522.18
fig|11428.3.peg.2649	2	99	GFTTELDVVEGMQFDR			0.00171447	1842.85	922.431	1842.85	922.43	2	23	1.1.1.2365.3
fig|11428.3.peg.2649	2	99	GRNVVLEK		missed R-N@2	-0.000963714	913.533	457.774	913.534	457.775	2	9	6.1.1.1288.5
fig|11428.3.peg.2649	2	99	GTFNVVAVK			-0.000793253	933.528	467.771	933.528	467.771	2	14	2.1.1.1689.6
fig|11428.3.peg.2649	2	99	GVDTLANAVK			-0.000563763	986.539	494.277	986.54	494.277	2	16	1.1.1.1516.9
fig|11428.3.peg.2649	2	99	GYASPYMITDSDK			-0.00247161	1446.63	724.323	1446.63	724.324	2	16	1.1.1.1612.15
fig|11428.3.peg.2649	2	99	GYASPYMITDSDKMEAVLDNPYILITDK		missed K-M@13	0.00842865	3162.52	1055.18	3162.51	1055.18	3	22	1.1.1.2624.3
fig|11428.3.peg.2649	2	99	GYASPYMITDSDKMEAVLDNPYILITDKK		missed K-M@13; missed K-K@28	0.00908355	3290.62	823.662	3290.61	823.66	4	17	1.1.1.2395.5
fig|11428.3.peg.2649	2	99	IEDALNSTR			0.000594107	1017.51	509.762	1017.51	509.762	2	13	4.1.1.1509.16
fig|11428.3.peg.2649	2	99	ISNIQEILPVLEQVVQQGK		cleaved K-P@C-term	0.00531243	2134.21	712.409	2134.2	712.407	3	26	5.1.1.3461.2
fig|11428.3.peg.2649	2	99	KAMLEDIAILTGGEVITEELGR		missed K-A@1	-0.0142691	2357.24	1179.63	2357.25	1179.63	2	25	4.1.1.2718.2
fig|11428.3.peg.2649	2	99	KFGSPLITNDGVTIAK		missed K-F@1	0.000317987	1659.92	554.314	1659.92	554.314	3	26	1.1.1.1652.2
fig|11428.3.peg.2649	2	99	KLRIEDALNSTR		missed K-L@1; missed R-I@3	-0.00511657	1414.78	708.399	1414.79	708.402	2	18	6.1.1.1499.6
fig|11428.3.peg.2649	2	99	KNVTAGANPMGLR		cleaved L-K@N-term; missed K-N@1	0.00244827	1327.71	664.86	1327.7	664.859	2	10	6.1.1.1441.16
fig|11428.3.peg.2649	2	99	KVGAATETELKER		cleaved I-K@N-term; missed K-V@1; missed K-E@11	0.00112116	1430.77	477.932	1430.77	477.932	3	12	6.1.1.1314.9
fig|11428.3.peg.2649	2	99	LAGGVAVIK			0.000493026	826.528	414.271	826.528	414.271	2	15	1.1.1.1492.3
fig|11428.3.peg.2649	2	99	LEGSVVVER		cleaved G-L@N-term	-0.00689226	986.533	494.274	986.54	494.277	2	11	6.1.1.1430.12
fig|11428.3.peg.2649	2	99	LRGTFNVVAVK		missed R-G@2	-0.00353604	1202.71	401.911	1202.71	401.912	3	11	4.1.1.1672.2
fig|11428.3.peg.2649	2	99	LRIEDALNSTR		missed R-I@2	-0.00841478	1286.69	644.35	1286.69	644.354	2	18	1.1.1.1580.15
fig|11428.3.peg.2649	2	99	LVAEVASK			0.000549251	815.476	408.745	815.475	408.745	2	10	14.1.1.1504.4
fig|11428.3.peg.2649	2	99	MEAVLDNPYILITDK			0.000730807	1733.89	867.953	1733.89	867.953	2	21	1.1.1.2302.9
fig|11428.3.peg.2649	2	99	MEAVLDNPYILITDKK		missed K-K@15	0.000139546	1861.99	621.669	1861.99	621.669	3	25	4.1.1.2007.2
fig|11428.3.peg.2649	2	99	MLESGIVDPAK		cleaved N-M@N-term	-0.00964606	1158.59	580.3	1158.6	580.305	2	10	5.1.1.1745.15
fig|11428.3.peg.2649	2	99	NVTAGANPMGLR	Oxidation(M)@9		-0.00179213	1215.6	608.808	1215.6	608.809	2	18	2.1.1.1523.6
fig|11428.3.peg.2649	2	99	NVTAGANPMGLRK		missed R-K@12	0.000701417	1327.7	443.575	1327.7	443.575	3	17	2.1.1.1556.2
fig|11428.3.peg.2649	2	99	NVVLEK			-0.000972858	700.411	351.213	700.412	351.213	2	7	4.1.1.1440.2
fig|11428.3.peg.2649	2	99	NVVLEKK		missed K-K@6	-0.00135262	828.505	415.26	828.507	415.261	2	8	1.1.1.1258.3
fig|11428.3.peg.2649	2	99	PYILITDKK		cleaved N-P@N-term; missed K-K@8	-0.00636441	1089.64	364.22	1089.64	364.222	3	11	3.1.1.1685.2
fig|11428.3.peg.2649	2	99	QIAINAGLEGSVVVER			-0.00213214	1653.9	827.959	1653.91	827.96	2	18	2.1.1.1850.15
fig|11428.3.peg.2649	2	99	RGTFNVVAVK		cleaved L-R@N-term; missed R-G@1	-0.00178406	1089.63	364.216	1089.63	364.217	3	12	3.1.1.1644.3
fig|11428.3.peg.2649	2	99	SALQNAASVAAMFLTTEAVVADKPEPNAPAMPDMGGM		cleaved M-G@C-term	0.0167989	3702.76	926.697	3702.74	926.692	4	21	15.1.1.4305.2
fig|11428.3.peg.2649	2	99	SALQNAASVAAMFLTTEAVVADKPEPNAPAMPDMGGMGMGGMGG		cleaved G-M@C-term	0.0122356	4249.94	1063.49	4249.93	1063.49	4	18	3.1.1.3864.5
fig|11428.3.peg.2649	2	99	SALQNAASVAAMFLTTEAVVADKPEPNAPAMPDMGGMGMGGMGGMM			-0.00120065	4512.01	1129.01	4512.01	1129.01	4	16	5.1.1.4199.2
fig|11428.3.peg.2649	2	99	SATVESLGR			-0.00206068	918.475	460.245	918.477	460.246	2	11	2.1.1.1491.8
fig|11428.3.peg.2649	2	99	SPLITNDGVTIAK		cleaved G-S@N-term	-0.002815	1327.73	664.873	1327.73	664.875	2	18	1.1.1.1609.16
fig|11428.3.peg.2649	2	99	SSIAQVAAISAADEEVGQLIAEAMER			0.00634651	2658.32	887.115	2658.32	887.113	3	28	1.1.1.3625.3
fig|11428.3.peg.2649	2	99	TAGANPMGLR	Dethiomethyl(M)@7	cleaved V-T@N-term	-0.00297599	938.49	470.252	938.493	470.254	2	11	4.1.1.1431.7
fig|11428.3.peg.2649	2	99	TAGANPMGLRK		cleaved V-T@N-term; missed R-K@10	-0.00442016	1114.59	558.301	1114.59	558.303	2	13	2.1.1.1558.7
fig|11428.3.peg.2649	2	99	TISKPIEGK			-0.00125788	971.564	486.789	971.565	486.79	2	15	2.1.1.1368.3
fig|11428.3.peg.2649	2	99	TISKPIEGKSSIAQVAAISAADEEVGQLIAEAMER		missed K-S@9	0.00838174	3611.88	903.977	3611.87	903.975	4	32	1.1.1.2937.2
fig|11428.3.peg.2649	2	99	TNDVAGDGTTTATVLAQAMIR			-0.00110038	2105.04	702.688	2105.04	702.688	3	28	1.1.1.2188.2
fig|11428.3.peg.2649	2	99	TTVVEGVGSTEQIEAR		cleaved N-T@N-term	-0.00940567	1674.83	838.424	1674.84	838.429	2	18	1.1.1.1548.24
fig|11428.3.peg.2649	2	99	VASIVAEGDEATGINIVLR			-0.00371748	1926.04	964.027	1926.04	964.028	2	21	5.1.1.4548.3
fig|11428.3.peg.2649	2	99	VGAATETELK			0.00147052	1017.54	509.775	1017.53	509.774	2	12	1.1.1.1374.12
fig|11428.3.peg.2649	2	99	VGAATETELKER		missed K-E@10	-0.0007447	1302.68	652.346	1302.68	652.346	2	12	1.1.1.1343.12
fig|11428.3.peg.2649	2	99	VGAATETELKERK		missed K-E@10; missed R-K@12	0.00123167	1430.77	477.932	1430.77	477.932	3	12	1.1.1.1311.6
fig|11428.3.peg.2649	2	99	VGNDGVITLEESK			-0.00382919	1359.68	680.849	1359.69	680.851	2	23	1.1.1.1565.21
fig|11428.3.peg.2649	2	99	VGNDGVITLEESKGFTTELDVVEGMQFDR		missed K-G@13	0.00342716	3184.53	1062.52	3184.52	1062.52	3	23	6.1.1.2248.10
fig|11428.3.peg.2649	2	99	VGVGFNAATGEWVNMLESGIVDPAK			-0.00147343	2560.26	854.428	2560.26	854.428	3	25	1.1.1.2976.3
fig|11428.3.peg.2649	2	99	VVVTKENTTVVEGVGSTEQIEAR		missed K-E@5	-0.00244803	2444.27	815.765	2444.28	815.766	3	20	1.1.1.1593.14
fig|11428.3.peg.2649	1.92082	99	SALQNAASVAAM		cleaved M-F@C-term	-0.00104709	1132.55	567.284	1132.55	567.285	2	13	4.1.1.1826.6
fig|11428.3.peg.2649	1.52288	99	AVTAAIEELKT		cleaved T-I@C-term; missed K-T@10	-0.000497221	1144.63	573.324	1144.63	573.324	2	19	7.1.1.1637.10
fig|11428.3.peg.2649	1.24413	99	LEETTSEFDREK		cleaved Q-L@N-term; missed R-E@10	0.00567736	1482.69	742.352	1482.68	742.349	2	14	1.1.1.1494.22
fig|11428.3.peg.2649	0.935542	99	ATETELKER		cleaved A-A@N-term; missed K-E@7	0.00224456	1075.55	538.784	1075.55	538.783	2	9	4.1.1.1464.12
fig|11428.3.peg.2649	0.430626	64.24	AKDIKFSEEAR		cleaved M-A@N-term; missed K-D@2; missed K-F@5	-0.00283298	1292.67	431.897	1292.67	431.898	3	6	2.1.1.1442.9
fig|11428.3.peg.2649	0.0996329	21.4	VTLGPKGR		missed K-G@6	-0.000926987	826.502	414.258	826.503	414.259	2	5	6.1.1.1276.4
fig|11428.3.peg.2649	0.02365	74	GGTSLMNVYTK		cleaved G-G@N-term	0.0217437	1169.6	585.806	1169.58	585.795	2	9	6.1.1.1560.9
fig|11428.3.peg.2649	0.00921731	45.39	SKPIEGK		cleaved I-S@N-term	0.000571323	757.434	379.724	757.433	379.724	2	5	15.1.1.1405.2
fig|11428.3.peg.2649	0.00130484	32.69	GVITLEESK		cleaved D-G@N-term	-0.00174853	974.527	488.271	974.528	488.271	2	7	2.1.1.1621.10
fig|11428.3.peg.1595	2	99	AGLTSEMVDK			-0.000694016	1049.51	525.76	1049.51	525.76	2	16	6.1.1.1468.11
fig|11428.3.peg.1595	2	99	AGLTSEMVDKYK		missed K-Y@10	-0.00530344	1340.66	671.337	1340.66	671.34	2	15	1.1.1.1533.19
fig|11428.3.peg.1595	2	99	AGLTSEMVDKYKSNPDFYTQK		missed K-Y@10; missed K-S@12	-0.000673033	2421.15	606.295	2421.15	606.295	4	23	1.1.1.1628.6
fig|11428.3.peg.1595	2	99	AINDGKAPLDTLGVK		missed K-A@6	-0.000799454	1510.83	504.619	1510.84	504.619	3	23	1.1.1.1585.5
fig|11428.3.peg.1595	2	99	AKEHWEK		missed K-E@2	-0.00260886	926.458	464.236	926.461	464.238	2	11	1.1.1.1177.4
fig|11428.3.peg.1595	2	99	APLDTLGVK			-0.00140261	912.527	457.271	912.528	457.271	2	12	1.1.1.1556.4
fig|11428.3.peg.1595	2	99	ATDQVSFLALNNVMEGLYR			-0.00246676	2140.06	1071.04	2140.06	1071.04	2	22	1.1.1.2739.2
fig|11428.3.peg.1595	2	99	ATPGVAESYK			-0.000215831	1021.51	511.761	1021.51	511.761	2	10	6.1.1.1369.13
fig|11428.3.peg.1595	2	99	ATPGVAESYKK		missed K-K@10	-0.00154903	1149.6	575.808	1149.6	575.809	2	12	2.1.1.1418.10
fig|11428.3.peg.1595	2	99	ATPGVAESYKKSDDGKK		missed K-K@10; missed K-S@11; missed K-K@16	0.00160144	1779.9	594.308	1779.9	594.307	3	10	1.1.1.1268.6
fig|11428.3.peg.1595	2	99	AVDDYTLEVELENPVPYFVELTSFGTFYPLNEK			-0.00356534	3837.85	960.47	3837.86	960.471	4	23	4.1.1.3969.2
fig|11428.3.peg.1595	2	99	AVDKNTAAEYAYIMFDLK		missed K-N@4	0.00395032	2062.01	688.345	2062.01	688.343	3	22	1.1.1.2307.3
fig|11428.3.peg.1595	2	99	DFRKENGDILK	Deamidated(N)@6	missed R-K@3; missed K-E@4	-0.000724078	1334.68	445.901	1334.68	445.902	3	14	1.1.1.1457.6
fig|11428.3.peg.1595	2	99	DFVFAWK			-0.00242319	911.452	456.733	911.454	456.734	2	11	4.1.1.2102.2
fig|11428.3.peg.1595	2	99	DSGTRVNLYESGQIDR		missed R-V@5	-0.00670964	1808.86	905.437	1808.87	905.44	2	17	1.1.1.1499.26
fig|11428.3.peg.1595	2	99	EHWEK			0.00049104	727.329	364.672	727.329	364.672	2	6	1.1.1.1208.3
fig|11428.3.peg.1595	2	99	ELGKEQVTIELLNYDSDNAK		missed K-E@4	0.00411575	2278.14	760.386	2278.13	760.385	3	25	4.1.1.1933.6
fig|11428.3.peg.1595	2	99	ELGKEQVTIELLNYDSDNAKK		missed K-E@4; missed K-K@20	-0.00603635	2406.22	1204.12	2406.23	1204.12	2	21	2.1.1.1851.9
fig|11428.3.peg.1595	2	99	EQVTIELLNYDSDNAK			0.0232825	1850.91	617.978	1850.89	617.971	3	13	4.1.1.1960.4
fig|11428.3.peg.1595	2	99	EQVTIELLNYDSDNAKK		missed K-K@16	-0.00218895	1978.98	660.668	1978.98	660.669	3	16	2.1.1.1860.11
fig|11428.3.peg.1595	2	99	ERWDSLLK		missed R-W@2	-0.000371788	1045.56	523.785	1045.56	523.785	2	12	13.1.1.1589.4
fig|11428.3.peg.1595	2	99	FGLEADTTLYNGPFTLTDWKHEEGWK	Deamidated(N)@11	missed K-H@20	0.00117149	3055.42	1019.48	3055.42	1019.48	3	20	6.1.1.2172.7
fig|11428.3.peg.1595	2	99	GDAIVQR			-0.00118367	757.407	379.711	757.408	379.711	2	11	7.1.1.1290.3
fig|11428.3.peg.1595	2	99	GGQDTVLK			-0.00253806	816.432	409.223	816.434	409.224	2	11	7.1.1.1311.3
fig|11428.3.peg.1595	2	99	GGQDTVLKNKDLR	Deamidated(N)@9	missed K-N@8; missed K-D@10	0.00447022	1443.77	482.265	1443.77	482.263	3	10	1.1.1.1378.7
fig|11428.3.peg.1595	2	99	GIVHHPVGGDYSYK			0.00123759	1527.75	764.881	1527.75	764.881	2	16	1.1.1.1396.11
fig|11428.3.peg.1595	2	99	GKGELLTK		missed K-G@2	-0.000998989	844.501	423.258	844.502	423.258	2	12	14.1.1.1430.2
fig|11428.3.peg.1595	2	99	GLTNVILNDGSTPADYLVPK			-0.000314049	2086.09	696.372	2086.09	696.372	3	25	1.1.1.2287.2
fig|11428.3.peg.1595	2	99	GLTNVILNDGSTPADYLVPKEFAK		missed K-E@20	0.00763661	2561.35	854.789	2561.34	854.786	3	20	6.1.1.2130.5
fig|11428.3.peg.1595	2	99	GLTSEMVDKYK		cleaved A-G@N-term; missed K-Y@9	0.00435628	1269.63	635.823	1269.63	635.821	2	13	3.1.1.1720.18
fig|11428.3.peg.1595	2	99	KENGDILKTDVK	Deamidated(N)@3	missed K-E@1; missed K-T@8	0.00053504	1359.73	454.249	1359.72	454.249	3	8	2.1.1.1505.6
fig|11428.3.peg.1595	2	99	KGLTNVILNDGSTPADYLVPK		missed K-G@1	0.000736049	2214.19	739.071	2214.19	739.07	3	25	6.1.1.1989.5
fig|11428.3.peg.1595	2	99	KVGEFLK		missed K-V@1	0.00138957	819.487	410.751	819.485	410.75	2	7	3.1.1.1587.8
fig|11428.3.peg.1595	2	99	KVGEFLKGELEK		missed K-V@1; missed K-G@7	-0.00200795	1375.77	459.597	1375.77	459.598	3	19	1.1.1.1522.3
fig|11428.3.peg.1595	2	99	KYDEIVEK		cleaved P-K@N-term; missed K-Y@1	0.000346422	1022.53	512.272	1022.53	512.271	2	13	13.1.1.1305.7
fig|11428.3.peg.1595	2	99	KYTFTLNK		missed K-Y@1	-0.00151563	1013.55	507.784	1013.55	507.785	2	11	4.1.1.1615.7
fig|11428.3.peg.1595	2	99	LDEINFNVVK			-0.00177241	1189.63	595.823	1189.63	595.824	2	16	1.1.1.1786.2
fig|11428.3.peg.1595	2	99	LDEINFNVVKDSGTR		missed K-D@10	0.00698428	1705.87	569.631	1705.86	569.628	3	11	4.1.1.1783.10
fig|11428.3.peg.1595	2	99	LDKDNKATPGVAESYK	Deamidated(N)@5	missed K-D@3; missed K-A@6	0.00933375	1735.87	579.631	1735.86	579.628	3	10	3.1.1.1531.15
fig|11428.3.peg.1595	2	99	LDKDNKATPGVAESYKK		missed K-D@3; missed K-A@6; missed K-K@16	-0.000937989	1862.97	466.75	1862.97	466.751	4	17	1.1.1.1309.7
fig|11428.3.peg.1595	2	99	LDKDNKATPGVAESYKKSDDGKK		missed K-D@3; missed K-A@6; missed K-K@16; missed K-S@17; missed K-K@22	0.01311	2493.28	499.664	2493.27	499.661	5	12	3.1.1.1442.4
fig|11428.3.peg.1595	2	99	LKKNAQYWDNK	Deamidated(N)@4	missed K-K@2; missed K-N@3	0.00330664	1407.72	704.866	1407.71	704.865	2	15	1.1.1.1387.4
fig|11428.3.peg.1595	2	99	MLLDDAVIAPLYQR	Oxidation(M)@1; Dehydrated(D)@5		0.000231138	1614.84	808.429	1614.84	808.429	2	23	1.1.1.2239.6
fig|11428.3.peg.1595	2	99	NAQYWDNK			0.00144925	1037.46	519.736	1037.46	519.736	2	11	4.1.1.1542.6
fig|11428.3.peg.1595	2	99	NDGKAPLDTLGVK		cleaved I-N@N-term; missed K-A@4	-0.000437104	1326.71	664.364	1326.71	664.364	2	19	3.1.1.1759.13
fig|11428.3.peg.1595	2	99	NLPGLTVNLK			-0.00334304	1067.63	534.823	1067.63	534.824	2	17	1.1.1.1763.2
fig|11428.3.peg.1595	2	99	PGVAESYKK		cleaved T-P@N-term; missed K-K@8	-0.000652385	977.518	489.766	977.518	489.766	2	10	3.1.1.1479.9
fig|11428.3.peg.1595	2	99	QVLNLTESQEIPSMDSAK			-0.00579264	1988.97	995.491	1988.97	995.494	2	24	2.1.1.1879.2
fig|11428.3.peg.1595	2	99	RGGQDTVLK		missed R-G@1	0.00177282	972.537	487.276	972.535	487.275	2	11	14.1.1.1393.2
fig|11428.3.peg.1595	2	99	RGGQDTVLKNKDLR		missed R-G@1; missed K-N@9; missed K-D@11	0.00222322	1598.89	533.97	1598.89	533.969	3	10	1.1.1.1328.8
fig|11428.3.peg.1595	2	99	SNPDFYTQK			0.00124595	1098.5	550.257	1098.5	550.256	2	11	11.1.1.1673.3
fig|11428.3.peg.1595	2	99	SPDGKDFR		missed K-D@5	-8.56462e-07	920.435	461.225	920.435	461.225	2	10	13.1.1.1211.3
fig|11428.3.peg.1595	2	99	SPDGKDFRKENGDILK	Deamidated(N)@11	missed K-D@5; missed R-K@8; missed K-E@9	0.00283093	1818.91	607.312	1818.91	607.311	3	24	1.1.1.1430.21
fig|11428.3.peg.1595	2	99	SPDGKDFRKENGDILKTDVKK	Deamidated(N)@11	missed K-D@5; missed R-K@8; missed K-E@9; missed K-T@16; missed K-K@20	0.0046832	2390.25	598.569	2390.24	598.568	4	20	6.1.1.1416.21
fig|11428.3.peg.1595	2	99	TKERWDSLLK		missed K-E@2; missed R-W@4	0.000611064	1274.7	425.907	1274.7	425.907	3	12	6.1.1.1530.7
fig|11428.3.peg.1595	2	99	TPSTFFLR			-0.0354042	967.477	484.746	967.513	484.764	2	10	5.1.1.1889.2
fig|11428.3.peg.1595	2	99	TSEMVDKYK		cleaved L-T@N-term; missed K-Y@7	0.00442611	1099.53	550.77	1099.52	550.768	2	9	5.1.1.1733.14
fig|11428.3.peg.1595	2	99	TVKLDEINFNVVK		missed K-L@3	-0.00187648	1517.84	759.929	1517.85	759.93	2	22	1.1.1.1814.2
fig|11428.3.peg.1595	2	99	VGEFLKGELEK		missed K-G@6	0.000664774	1247.68	416.899	1247.68	416.899	3	15	1.1.1.1590.2
fig|11428.3.peg.1595	2	99	VKGIVHHPVGGDYSYK		missed K-G@2	0.00233818	1754.91	439.736	1754.91	439.735	4	17	2.1.1.1485.10
fig|11428.3.peg.1595	2	99	VNLYESGQIDR			-0.00247049	1292.63	647.324	1292.64	647.325	2	17	1.1.1.1545.17
fig|11428.3.peg.1595	2	99	WAYITEDK	Oxidation(W)@1		-0.00198427	1040.48	521.247	1040.48	521.248	2	11	3.1.1.1656.8
fig|11428.3.peg.1595	2	99	WDSLLK			-0.00323363	760.409	381.212	760.412	381.213	2	9	13.1.1.1557.2
fig|11428.3.peg.1595	2	99	WDSLLKAEK		missed K-A@6	-0.00142494	1088.59	363.869	1088.59	363.869	3	10	2.1.1.1660.2
fig|11428.3.peg.1595	2	99	WSNGEPVTAK	Dioxidation(W)@1; Deamidated(N)@3		0.00142095	1120.51	561.26	1120.5	561.259	2	9	3.1.1.1496.14
fig|11428.3.peg.1595	2	99	WSNGEPVTAKDFVFAWK	Deamidated(N)@3	missed K-D@10	0.00379789	1981.96	661.661	1981.96	661.66	3	16	6.1.1.2110.2
fig|11428.3.peg.1595	2	99	YDEIVEK			-0.00233783	894.431	448.223	894.433	448.224	2	11	2.1.1.1500.8
fig|11428.3.peg.1595	2	99	YDEIVEKGKGELLTK		missed K-G@7; missed K-G@9	0.000512493	1720.93	574.649	1720.92	574.649	3	16	6.1.1.1512.8
fig|11428.3.peg.1595	2	99	YTFTLNK			-0.000221466	885.459	443.737	885.46	443.737	2	11	13.1.1.1529.3
fig|11428.3.peg.1595	2	99	YTFTLNKNAK	Deamidated(N)@8	missed K-N@7	0.00175817	1199.62	600.817	1199.62	600.817	2	15	3.1.1.1683.13
fig|11428.3.peg.1595	0.653647	94.95	SPDGKDFRKENGDILKTDVK	Deamidated(N)@11	missed K-D@5; missed R-K@8; missed K-E@9; missed K-T@16	0.0144759	2262.16	566.548	2262.15	566.545	4	11	3.1.1.1643.17
fig|11428.3.peg.1595	0.540608	92.85	HEEGWKLK		missed K-L@6	-0.0183925	1025.51	513.763	1025.53	513.772	2	8	3.1.1.1581.10
fig|11428.3.peg.1595	0.327902	54.69	SDDGKKYTFTLNK		missed K-K@5; missed K-Y@6	-0.00118651	1515.76	506.259	1515.76	506.26	3	7	3.1.1.1619.9
fig|11428.3.peg.1595	0.201349	72.86	ENGDILKTDVK	Deamidated(N)@2	missed K-T@7	0.0178943	1231.65	411.556	1231.63	411.55	3	7	5.1.1.1642.7
fig|11428.3.peg.1595	0.102923	22.3	YKSNPDFYTQK		missed K-S@2	0.0130869	1389.67	695.842	1389.66	695.836	2	5	3.1.1.1588.14
fig|11428.3.peg.1595	0.102373	64.71	AVDKNTAAEYAY		cleaved Y-I@C-term; missed K-N@4	0.0142512	1314.62	658.319	1314.61	658.312	2	9	14.1.1.1670.8
fig|11428.3.peg.1595	0.093665	54.38	KENGDILKTDVKK	Deamidated(N)@3	missed K-E@1; missed K-T@8; missed K-K@12	0.00574875	1487.83	372.964	1487.82	372.962	4	6	1.1.1.1350.4
fig|11428.3.peg.1595	0.0877779	19.33	ATPGVAESYKKSDDGK		missed K-K@10; missed K-S@11	0.00651051	1651.81	413.96	1651.81	413.959	4	5	14.1.1.1465.6
fig|11428.3.peg.1595	0.0872467	50.35	KENGDILK	Deamidated(N)@3	missed K-E@1	0.00182363	916.488	459.252	916.487	459.251	2	5	4.1.1.1411.4
fig|11428.3.peg.1595	0.0746879	96.25	ELLTK		cleaved G-E@N-term	0.00480268	602.369	603.376	602.364	603.371	1	7	8.1.1.1283.7
fig|11428.3.peg.1595	0.0660068	42.69	ENGDILK	Deamidated(N)@2		-0.00204543	788.39	395.202	788.392	395.203	2	5	13.1.1.1343.5
fig|11428.3.peg.1595	0.0163737	15.06	KNAQYWDNK	Deamidated(N)@2	missed K-N@1	0.00578837	1166.54	389.854	1166.54	389.852	3	5	1.1.1.1401.2
fig|1428.368.peg.1846	2	99	ASGGTDYQVIK			0.00046668	1137.57	569.791	1137.57	569.791	2	12	14.1.1.1621.9
fig|1428.368.peg.1846	2	99	ATFDNLEVIEANPLTGEALAR			-0.00434366	2243.14	1122.58	2243.14	1122.58	2	22	16.1.1.3115.2
fig|1428.368.peg.1846	2	99	AVNALFTSDAK			0.00349438	1135.59	568.803	1135.59	568.801	2	13	13.1.1.1520.9
fig|1428.368.peg.1846	2	99	AVQTAQGAIQALFTDSNQNR			0.00135141	2132.06	711.695	2132.06	711.694	3	24	17.1.1.2188.2
fig|1428.368.peg.1846	2	99	DLEVFITR			0.000792169	991.535	496.775	991.534	496.774	2	13	16.1.1.2250.2
fig|1428.368.peg.1846	2	99	DNATTFVDPK			0.00171164	1106.53	554.27	1106.52	554.269	2	14	16.1.1.1620.8
fig|1428.368.peg.1846	2	99	DVEAWNLR			0.00456109	1001.5	501.756	1001.49	501.754	2	10	17.1.1.1839.3
fig|1428.368.peg.1846	2	99	EGSGEGYVTISDGTEDNTETLK			0.00405654	2301.02	768.013	2301.01	768.012	3	28	16.1.1.1774.3
fig|1428.368.peg.1846	2	99	EIYTSIR			-0.000706423	880.465	441.24	880.465	441.24	2	8	17.1.1.1641.6
fig|1428.368.peg.1846	2	99	ELGTSQGVLELSIER			-0.00315079	1629.85	815.934	1629.86	815.936	2	23	17.1.1.1997.3
fig|1428.368.peg.1846	2	99	FEPVRDNATTFVD		cleaved D-P@C-term; missed R-D@5	-0.00169826	1509.71	755.861	1509.71	755.862	2	15	16.1.1.1803.7
fig|1428.368.peg.1846	2	99	FEPVRDNATTFVDPK		missed R-D@5	0.00517157	1734.86	579.295	1734.86	579.293	3	19	16.1.1.1730.5
fig|1428.368.peg.1846	2	99	FTVGEVATR			-0.000674138	978.513	490.264	978.513	490.264	2	14	16.1.1.1663.4
fig|1428.368.peg.1846	2	99	GPGSTGGDLVSLPTYAK			-0.00498735	1618.82	810.415	1618.82	810.417	2	31	16.1.1.1964.2
fig|1428.368.peg.1846	2	99	GQALIGLK			-0.0039715	798.492	400.253	798.496	400.255	2	13	16.1.1.1670.2
fig|1428.368.peg.1846	2	99	GTTYRSDPAQNTMSAIEAR		missed R-S@5	0.00118457	2067.97	690.329	2067.96	690.329	3	14	16.1.1.1732.6
fig|1428.368.peg.1846	2	99	GYETILLPLYAQAANIHLIVLR			0.00676475	2480.42	827.815	2480.42	827.812	3	19	16.1.1.4113.2
fig|1428.368.peg.1846	2	99	ICIEIGEISGTFK	Carbamidomethyl(C)@2		0.00460279	1465.75	733.884	1465.75	733.882	2	18	17.1.1.2131.2
fig|1428.368.peg.1846	2	99	IDPFDEPIIIDK			0.00152212	1413.74	707.878	1413.74	707.877	2	20	17.1.1.2106.2
fig|1428.368.peg.1846	2	99	IDPFDEPIIIDKIEFIPIQGSVETYEADQDLEK		missed K-I@12	0.0158491	3818.92	955.737	3818.9	955.733	4	26	17.1.1.2981.2
fig|1428.368.peg.1846	2	99	IEFIPIQGSVETYEADQDLEK			0.00143162	2423.18	808.732	2423.17	808.732	3	26	17.1.1.2214.3
fig|1428.368.peg.1846	2	99	IEIPLTSSAGQLYTIR			-5.44499e-05	1760.97	881.491	1760.97	881.491	2	26	16.1.1.2631.3
fig|1428.368.peg.1846	2	99	IFPETNR		cleaved E-I@N-term	-0.00112189	875.449	438.732	875.45	438.732	2	6	17.1.1.1623.6
fig|1428.368.peg.1846	2	99	INDYQIDYK			0.00568092	1170.56	586.288	1170.56	586.285	2	14	15.1.1.1700.12
fig|1428.368.peg.1846	2	99	INDYQIDYKNK		missed K-N@9	-0.00578483	1412.69	471.903	1412.69	471.905	3	10	16.1.1.1590.5
fig|1428.368.peg.1846	2	99	IPYVYNAFLQGALPPVPGETSDIFQQLSSAVAIAR			0.0265381	3731.98	934.003	3731.96	933.996	4	21	16.1.1.4906.2
fig|1428.368.peg.1846	2	99	IWETNPTPGNTSQLLDAFR			0.00218073	2159.07	1080.54	2159.06	1080.54	2	23	16.1.1.2980.2
fig|1428.368.peg.1846	2	99	KAVNALFTSDAK		missed K-A@1	-0.00141249	1263.68	422.234	1263.68	422.235	3	15	18.1.1.1647.3
fig|1428.368.peg.1846	2	99	KEGSGEGYVTISDGTEDNTETLK		missed K-E@1	0.00350867	2429.11	810.711	2429.11	810.71	3	20	16.1.1.1695.12
fig|1428.368.peg.1846	2	99	LAQSDMR			-0.00327157	819.388	410.701	819.391	410.703	2	7	18.1.1.1421.3
fig|1428.368.peg.1846	2	99	LKPDITLNHILQAETEVQK			0.00322849	2189.21	730.744	2189.21	730.742	3	23	16.1.1.2266.5
fig|1428.368.peg.1846	2	99	LVECMSDKIYPQEK	Carbamidomethyl(C)@4	missed K-I@8	-0.00215719	1738.82	870.42	1738.83	870.421	2	23	16.1.1.1691.11
fig|1428.368.peg.1846	2	99	MCLLDQVK	Oxidation(M)@1; Carbamidomethyl(C)@2		-0.000991796	1021.49	511.754	1021.49	511.754	2	12	16.1.1.1681.4
fig|1428.368.peg.1846	2	99	MIRPPHLFEWPQTMTFFFEDVNVR			0.0128096	3036.49	760.13	3036.48	760.127	4	23	17.1.1.2953.2
fig|1428.368.peg.1846	2	99	NEFISSMTIQVLDTVALWPTYDPK			0.0170075	2767.39	923.472	2767.38	923.467	3	22	17.1.1.3798.2
fig|1428.368.peg.1846	2	99	NLALDHIDR			-0.00204822	1065.55	533.785	1065.56	533.786	2	15	16.1.1.1631.5
fig|1428.368.peg.1846	2	99	NLALDHIDRINDYQIDYK		missed R-I@9	0.00476562	2218.11	740.376	2218.1	740.375	3	22	16.1.1.2093.3
fig|1428.368.peg.1846	2	99	NLLNHGDFEFPDWSGENGWK	Deamidated(N)@17		-0.0018316	2362.03	788.35	2362.03	788.35	3	24	16.1.1.3003.2
fig|1428.368.peg.1846	2	99	NNPSNENGSDYGCGCR	Deamidated(N)@7; Carbamidomethyl(C)@13; Carbamidomethyl(C)@15		-0.0124102	1800.63	901.322	1800.64	901.329	2	15	17.1.1.1473.4
fig|1428.368.peg.1846	2	99	NVLRNGDFMAGLSNWR	Deamidated(N)@5	missed R-N@4	0.00504081	1849.89	617.639	1849.89	617.637	3	23	17.1.1.2116.2
fig|1428.368.peg.1846	2	99	PAQNTMSAIEAR		cleaved D-P@N-term	-0.026604	1287.6	644.806	1287.62	644.819	2	14	16.1.1.1617.20
fig|1428.368.peg.1846	2	99	QASLTNEYTQSQNGFNPSFAGNAR	Deamidated(N)@13		-0.0034414	2602.17	868.396	2602.17	868.397	3	23	17.1.1.1900.10
fig|1428.368.peg.1846	2	99	QIGATIFGWTHTSVDPNNTIDTTK			0.00431253	2616.29	873.103	2616.28	873.101	3	19	16.1.1.2542.3
fig|1428.368.peg.1846	2	99	QNTFPPIEVPEGTPPPSHR			0.00236324	2099.05	700.689	2099.04	700.688	3	19	17.1.1.1860.9
fig|1428.368.peg.1846	2	99	SCQDAMPHLDTR	Carbamidomethyl(C)@2		0.000161102	1429.61	477.543	1429.61	477.543	3	17	16.1.1.1599.6
fig|1428.368.peg.1846	2	99	SDPAQNTMSAIEAR			-0.000277414	1489.68	745.849	1489.68	745.849	2	22	16.1.1.1732.7
fig|1428.368.peg.1846	2	99	TDSYPMTAHSSSLSGYVTK			0.00417511	2030.93	677.984	2030.93	677.982	3	18	16.1.1.1738.4
fig|1428.368.peg.1846	2	99	TFEIFPETNR			0.00100403	1252.61	627.312	1252.61	627.312	2	17	16.1.1.2162.2
fig|1428.368.peg.1846	2	99	THTNNKTDSYPMTAHSSSLSGYVTK	Deamidated(N)@4	missed K-T@6	0.00911752	2727.25	682.821	2727.24	682.818	4	16	16.1.1.1654.20
fig|1428.368.peg.1846	2	99	TKQWFEPR		missed K-Q@2	-0.000553336	1090.56	546.285	1090.56	546.285	2	13	16.1.1.1630.4
fig|1428.368.peg.1846	2	99	TLDTNMITALQGLTDEYEYYHIPLDVSTGQK			0.0144267	3528.71	1177.24	3528.7	1177.24	3	19	16.1.1.4049.2
fig|1428.368.peg.1846	2	99	TSNHVSVMSGNPIFK			-0.000422575	1616.8	539.94	1616.8	539.94	3	22	16.1.1.1775.2
fig|1428.368.peg.1846	2	99	VESIELIR			-0.00176709	957.548	479.781	957.549	479.782	2	13	16.1.1.1789.2
fig|1428.368.peg.1846	2	99	VQQTFVK			-0.00197509	848.474	425.244	848.476	425.245	2	9	18.1.1.1534.6
fig|1428.368.peg.1846	2	99	VWESMIGYAQALIK			-0.00141787	1607.84	804.926	1607.84	804.926	2	23	16.1.1.3530.2
fig|1428.368.peg.1846	2	99	VYTAAVKTEFTR		missed K-T@7	0.00255575	1384.74	462.587	1384.74	462.586	3	12	16.1.1.1619.8
fig|1428.368.peg.1846	2	99	YLHMPGADNPQLSDQVYPTYAYQK			0.00112032	2798.3	933.775	2798.3	933.774	3	20	16.1.1.2145.2
fig|1428.368.peg.1846	2	99	YNQDEFYSGFFGPENSCK	Carbamidomethyl(C)@17		0.0034677	2187.89	730.303	2187.88	730.302	3	21	17.1.1.2100.2
fig|1428.368.peg.1846	2	99	YRELGTSQGVLELSIER		missed R-E@2	0.00524387	1949.03	650.683	1949.02	650.681	3	22	17.1.1.1928.2
fig|1428.368.peg.1846	2	99	YSNGEYKDVEAWNLR	Deamidated(N)@3	missed K-D@7	-0.000187109	1843.84	615.62	1843.84	615.62	3	25	16.1.1.1960.2
fig|1428.368.peg.1846	2	99	YTDYDVPSTPYSGGNLTYNAFR			0.00360244	2500.12	834.381	2500.12	834.38	3	22	17.1.1.2042.8
fig|1428.368.peg.1846	2	99	YTGEEQAGGLIR			-0.00407711	1292.63	647.323	1292.64	647.325	2	19	17.1.1.1694.6
fig|1428.368.peg.1846	2	99	YTWVGNSWTK			-0.00290636	1240.58	621.3	1240.59	621.301	2	15	16.1.1.1967.2
fig|1428.368.peg.1846	1.88606	99	ALDHIDR		cleaved L-A@N-term	-0.00185266	838.428	420.221	838.43	420.222	2	10	16.1.1.1632.3
fig|1428.368.peg.1846	1.82391	98.59	VYTAAVK			-0.00176916	750.426	376.22	750.428	376.221	2	6	17.1.1.1443.3
fig|1428.368.peg.1846	1.67778	98.02	YPWVR			-0.00130046	719.374	360.694	719.375	360.695	2	6	18.1.1.1737.2
fig|1428.368.peg.1846	1.52288	97.19	GQALIGLKTESTR		missed K-T@8	-0.00123692	1372.77	687.39	1372.77	687.391	2	8	16.1.1.1618.21
fig|1428.368.peg.1846	1.46852	96.83	YRDMQWR		missed R-D@2	0.00462309	1053.49	352.169	1053.48	352.168	3	10	16.1.1.1562.2
fig|1428.368.peg.1846	1.25964	94.87	EFIFYR			9.50654e-05	873.439	437.727	873.438	437.727	2	9	16.1.1.2040.2
fig|1428.368.peg.1846	1.25964	94.9	LVECMSDK	Carbamidomethyl(C)@4		-0.000568301	980.43	491.222	980.431	491.223	2	6	17.1.1.1505.6
fig|1428.368.peg.1846	1.12494	92.99	QWFEPR			-0.000138945	861.413	431.714	861.413	431.714	2	6	17.1.1.1768.2
fig|1428.368.peg.1846	1.08092	92.32	LLYEQR			-0.00430415	820.44	411.227	820.444	411.229	2	9	17.1.1.1572.2
fig|1428.368.peg.1846	1.01773	91.08	ELTETVR			-0.00264632	846.442	424.228	846.445	424.23	2	7	17.1.1.1488.6
fig|1428.368.peg.1846	0.565431	98.93	GSTGGDLVSLPTYAK		cleaved P-G@N-term	-0.00482105	1464.74	733.378	1464.75	733.38	2	16	17.1.1.1878.7
fig|1428.368.peg.1846	0.284833	97.62	PQLSDQVYPTYAYQK		cleaved N-P@N-term	-0.00838359	1799.86	900.94	1799.87	900.944	2	13	17.1.1.1832.18
fig|1428.368.peg.1846	0.192465	37.62	DITNIR			0.00159104	730.399	366.207	730.397	366.206	2	4	17.1.1.1566.3
fig|1428.368.peg.1846	0.184422	36.38	LLYEQRNVLR		missed R-N@6	0.0016637	1302.74	435.255	1302.74	435.254	3	6	18.1.1.1683.3
fig|1428.368.peg.1846	0.142668	29.57	RLSQLR		missed R-L@1	-0.00239596	771.469	386.742	771.471	386.743	2	5	16.1.1.1387.2
fig|1428.368.peg.1846	0.0920515	20.37	DGLMHGR			-0.00174863	784.363	393.189	784.365	393.19	2	5	16.1.1.1391.3
fig|1428.368.peg.1846	0.0381045	41.18	IRYAAAEQKR	Deamidated(Q)@8	missed R-Y@2; missed K-R@9	-0.00329659	1205.65	603.832	1205.65	603.833	2	9	18.1.1.1501.3
fig|1428.368.peg.1846	0.0305841	25.14	NVLRNGDFMAGLSNWRGAK	Deamidated(N)@14	missed R-N@4; missed R-G@16	-0.0161433	2106.03	703.016	2106.04	703.022	3	9	9.1.1.2156.2
fig|1428.368.peg.1846	0.0136762	19.62	IRYAAAEQK	Deamidated(Q)@8	missed R-Y@2	-0.000315906	1049.55	525.782	1049.55	525.783	2	6	14.1.1.1611.14
fig|1428.368.peg.1846	0.00392635	59.73	SQNGFNPSFAGNAR	Deamidated(N)@3	cleaved Q-S@N-term	0.00895146	1466.66	734.339	1466.65	734.334	2	11	18.1.1.1739.11
fig|1428.368.peg.1846	0.000434512	96.97	NMANAPLEAYGTNGYTNNPMTNYPSDNAGANAYPGNHNR	Deamidated(N)@22; Carbamidomethyl(S)@25; Deamidated(N)@31		0.00430404	4214.77	1054.7	4214.77	1054.7	4	17	17.1.1.1815.4
fig|11428.3.peg.4825	2	99	AFREEILIR		missed R-E@3	-0.00108785	1145.65	382.892	1145.66	382.893	3	14	2.1.1.1722.2
fig|11428.3.peg.4825	2	99	AFVYSYEESAK			-0.00211842	1292.59	647.302	1292.59	647.304	2	12	4.1.1.1700.19
fig|11428.3.peg.4825	2	99	AYRFDGELNK		missed R-F@3	-0.00225488	1211.59	404.871	1211.59	404.872	3	14	13.1.1.1433.4
fig|11428.3.peg.4825	2	99	AYRFDGELNKANR		missed R-F@3; missed K-A@10	0.010977	1552.79	389.204	1552.77	389.201	4	10	7.1.1.1455.4
fig|11428.3.peg.4825	2	99	DAGIEEVDGR			-0.00107643	1059.48	530.748	1059.48	530.749	2	16	17.1.1.1600.3
fig|11428.3.peg.4825	2	99	DAGIEEVDGRR		missed R-R@10	0.000348474	1215.58	406.202	1215.58	406.202	3	16	7.1.1.1399.2
fig|11428.3.peg.4825	2	99	DGLDQHPSISNEDRER		missed R-E@14	-0.00241811	1866.84	623.288	1866.85	623.289	3	16	7.1.1.1402.8
fig|11428.3.peg.4825	2	99	DPLTGEEMSPDEK			-3.02943e-05	1446.62	724.317	1446.62	724.316	2	16	8.1.1.1535.22
fig|11428.3.peg.4825	2	99	ERPWVAQTAH		cleaved H-S@C-term	0.00465677	1193.6	398.873	1193.59	398.872	3	8	13.1.1.1357.6
fig|11428.3.peg.4825	2	99	ERPWVAQTAHSR			-0.00133148	1436.73	479.916	1436.73	479.916	3	14	2.1.1.1459.10
fig|11428.3.peg.4825	2	99	ESDVSNVHIAPHTLR			0.00386793	1673.85	558.958	1673.85	558.957	3	17	1.1.1.1460.9
fig|11428.3.peg.4825	2	99	EVPSINALDVLR			-0.00378537	1324.73	663.373	1324.74	663.375	2	16	2.1.1.2266.2
fig|11428.3.peg.4825	2	99	EYQDEGMKGIDPR	Oxidation(M)@7	missed K-G@8	-0.00208256	1552.68	518.567	1552.68	518.568	3	14	7.1.1.1374.3
fig|11428.3.peg.4825	2	99	FALISADELIVAHTNETEYR			0.0043496	2291.15	764.723	2291.14	764.722	3	19	17.1.1.2152.2
fig|11428.3.peg.4825	2	99	FLWHLLSLTQEGNFK			-0.0022733	1831.96	611.661	1831.96	611.661	3	25	7.1.1.2698.2
fig|11428.3.peg.4825	2	99	GAIFAIK			-0.000763632	718.437	360.226	718.438	360.226	2	9	2.1.1.1740.2
fig|11428.3.peg.4825	2	99	GLETYSR			0.00422511	824.407	413.211	824.403	413.209	2	10	8.1.1.1377.2
fig|11428.3.peg.4825	2	99	GMMEFQEMLK			-0.00296955	1242.54	622.278	1242.54	622.28	2	13	14.1.1.2208.6
fig|11428.3.peg.4825	2	99	IAEYGSESDPR		cleaved T-I@N-term	0.000692101	1222.55	612.281	1222.55	612.281	2	14	13.1.1.1323.3
fig|11428.3.peg.4825	2	99	IEDVVVER			0.000161062	957.513	479.764	957.513	479.764	2	11	13.1.1.1410.12
fig|11428.3.peg.4825	2	99	IEGNLSPLNVMR			0.00129107	1341.71	671.862	1341.71	671.861	2	21	2.1.1.1881.3
fig|11428.3.peg.4825	2	99	IFFSEDR			-0.00065137	912.433	457.224	912.434	457.224	2	8	14.1.1.1775.7
fig|11428.3.peg.4825	2	99	IFFSEDRR		missed R-R@7	0.000225536	1068.54	535.275	1068.54	535.275	2	13	16.1.1.1630.3
fig|11428.3.peg.4825	2	99	IIVMPVPYNLR			-0.000312176	1313.75	657.884	1313.75	657.884	2	16	1.1.1.2086.2
fig|11428.3.peg.4825	2	99	ILLLMGPVSGGK			-0.00311581	1183.7	592.856	1183.7	592.857	2	14	2.1.1.2080.3
fig|11428.3.peg.4825	2	99	INDVVAR			-0.00180928	785.438	393.726	785.44	393.727	2	9	7.1.1.1350.6
fig|11428.3.peg.4825	2	99	ISSTIIR			-0.00150335	788.474	395.244	788.476	395.245	2	8	2.1.1.1550.8
fig|11428.3.peg.4825	2	99	ISSTIIRK		missed R-K@7	-0.001165	916.569	459.292	916.571	459.293	2	10	18.1.1.1495.5
fig|11428.3.peg.4825	2	99	ITTSTKTPDENQLK		missed K-T@6	-0.00400278	1574.81	525.944	1574.82	525.946	3	11	8.1.1.1380.18
fig|11428.3.peg.4825	2	99	ITTSTKTPDENQLKK		missed K-T@6; missed K-K@14	-0.00172424	1702.91	568.643	1702.91	568.644	3	7	9.1.1.1304.14
fig|11428.3.peg.4825	2	99	IYNMIK			-0.00139244	780.419	391.217	780.42	391.217	2	7	13.1.1.1441.3
fig|11428.3.peg.4825	2	99	KAFREEILIR		missed K-A@1; missed R-E@4	0.00370251	1273.75	425.592	1273.75	425.591	3	14	1.1.1.1512.3
fig|11428.3.peg.4825	2	99	KEYDEIAK		missed K-E@1	-0.00404713	994.493	498.254	994.497	498.256	2	7	13.1.1.1265.8
fig|11428.3.peg.4825	2	99	KEYDEIAKK		missed K-E@1; missed K-K@8	-0.000276528	1122.59	375.205	1122.59	375.205	3	14	7.1.1.1267.2
fig|11428.3.peg.4825	2	99	KINDVVAR		missed K-I@1	0.00463034	913.539	457.777	913.534	457.775	2	8	8.1.1.1326.6
fig|11428.3.peg.4825	2	99	KLFADLKDIVK		missed K-L@1; missed K-D@7	0.00462798	1288.78	430.601	1288.78	430.599	3	17	2.1.1.1825.2
fig|11428.3.peg.4825	2	99	KYNFFSNQLFGLEDALER		missed K-Y@1	-9.43011e-05	2190.07	731.032	2190.07	731.032	3	22	6.1.1.2240.3
fig|11428.3.peg.4825	2	99	LEQEYGSR			0.00203119	980.458	491.236	980.456	491.235	2	8	13.1.1.1251.5
fig|11428.3.peg.4825	2	99	LEQEYGSRIEDVVVER		missed R-I@8	0.0021489	1919.96	640.994	1919.96	640.994	3	15	2.1.1.1792.10
fig|11428.3.peg.4825	2	99	LFADLKDIVK		missed K-D@6	0.000453049	1160.68	581.348	1160.68	581.348	2	17	7.1.1.1938.2
fig|11428.3.peg.4825	2	99	LIDEHGYNSSSANELLR			0.00254485	1916.93	639.982	1916.92	639.982	3	26	1.1.1.1603.7
fig|11428.3.peg.4825	2	99	LQWEGTFAEYLELVK			0.00526611	1824.94	913.475	1824.93	913.472	2	20	17.1.1.2944.2
fig|11428.3.peg.4825	2	99	LRDPLTGEEMSPDEK		missed R-D@2	-0.00188955	1715.8	572.941	1715.8	572.942	3	18	1.1.1.1619.6
fig|11428.3.peg.4825	2	99	LVEEYFHPSAK			-0.00249164	1318.65	660.334	1318.66	660.335	2	18	8.1.1.1567.19
fig|11428.3.peg.4825	2	99	MIRESDVSNVHIAPHTLR		missed R-E@3	0.0017876	2074.08	519.526	2074.07	519.526	4	18	1.1.1.1504.12
fig|11428.3.peg.4825	2	99	RFDYNSHER		missed R-F@1	-0.00228953	1222.55	408.522	1222.55	408.523	3	10	18.1.1.1452.3
fig|11428.3.peg.4825	2	99	RPDIDLIK			0.00160341	968.567	485.291	968.565	485.29	2	12	7.1.1.1530.8
fig|11428.3.peg.4825	2	99	RPDIDLIKK		missed K-K@8	0.00219374	1096.66	366.562	1096.66	366.561	3	14	1.1.1.1441.3
fig|11428.3.peg.4825	2	99	RTGIGTFSPSDPK		missed R-T@1	0.00114781	1361.69	454.906	1361.69	454.905	3	11	16.1.1.1594.7
fig|11428.3.peg.4825	2	99	SFIANKKNEALHSR		missed K-K@6; missed K-N@7	-0.00555366	1613.86	538.96	1613.86	538.962	3	9	7.1.1.1349.6
fig|11428.3.peg.4825	2	99	SIEEQIGISENAK			-0.00203298	1416.71	709.361	1416.71	709.362	2	20	1.1.1.1579.16
fig|11428.3.peg.4825	2	99	SIEEQIGISENAKK	Deamidated(N)@11	missed K-K@13	-0.00407589	1545.78	773.899	1545.79	773.902	2	21	1.1.1.1522.14
fig|11428.3.peg.4825	2	99	SLKDGLDQHPSISNEDR		missed K-D@3	0.00560042	1909.92	637.647	1909.91	637.645	3	12	16.1.1.1598.13
fig|11428.3.peg.4825	2	99	SLKDGLDQHPSISNEDRER		missed K-D@3; missed R-E@17	0.00526207	2195.06	549.773	2195.06	549.771	4	17	1.1.1.1439.13
fig|11428.3.peg.4825	2	99	STLVTMLK			-0.00259103	891.507	446.761	891.51	446.762	2	13	7.1.1.1652.4
fig|11428.3.peg.4825	2	99	STLVTMLKR		missed K-R@8	0.000379189	1047.61	350.211	1047.61	350.211	3	9	14.1.1.1741.2
fig|11428.3.peg.4825	2	99	TGIGTFSPSDPK			0.00242701	1205.6	603.805	1205.59	603.804	2	15	4.1.1.1659.18
fig|11428.3.peg.4825	2	99	TPDENQLK			-0.00163239	943.459	472.737	943.461	472.738	2	6	7.1.1.1305.12
fig|11428.3.peg.4825	2	99	TPDENQLKK		missed K-K@8	0.00243709	1071.56	358.193	1071.56	358.193	3	12	7.1.1.1256.2
fig|11428.3.peg.4825	2	99	VAAMFTILTR			-0.00243836	1121.62	561.819	1121.63	561.821	2	17	1.1.1.2114.2
fig|11428.3.peg.4825	2	99	VSEEEHIYEK			0.00234273	1261.58	631.8	1261.58	631.799	2	15	1.1.1.1359.13
fig|11428.3.peg.4825	2	99	YMNFISLAR			-0.00210276	1113.56	557.788	1113.56	557.789	2	15	1.1.1.2025.2
fig|11428.3.peg.4825	2	99	YNFFSNQLFGLEDALER			0.00870058	2061.99	1032	2061.98	1032	2	24	7.1.1.3409.2
fig|11428.3.peg.4825	2	99	YVGSLLNR			0.000437845	920.508	461.262	920.508	461.261	2	13	7.1.1.1544.2
fig|11428.3.peg.4825	1.58503	97.59	EEILIR			-0.00174492	771.447	386.731	771.449	386.732	2	7	17.1.1.1679.2
fig|11428.3.peg.4825	1.4437	99	LIDEHGYNSSSANE		cleaved E-L@C-term	0.00585912	1534.66	768.337	1534.65	768.334	2	10	5.1.1.1611.25
fig|11428.3.peg.4825	1.39794	96.33	FDYNSHER			-0.000350942	1066.45	356.489	1066.45	356.49	3	7	7.1.1.1340.2
fig|11428.3.peg.4825	1.0655	92.07	FDGELNK			0.00654152	821.398	411.707	821.392	411.703	2	6	8.1.1.1380.6
fig|11428.3.peg.4825	1	90.67	KNEALHSR		missed K-N@1	0.00211393	953.506	477.76	953.504	477.759	2	6	8.1.1.1010.2
fig|11428.3.peg.4825	0.856985	87.1	SFIANKK		missed K-K@6	-0.00323881	806.462	404.238	806.465	404.24	2	7	7.1.1.1270.2
fig|11428.3.peg.4825	0.815309	85.69	LFADLK			0.00301037	705.409	353.712	705.406	353.71	2	6	8.1.1.1590.2
fig|11428.3.peg.4825	0.785156	84.73	GLETYSRTDR		missed R-T@7	0.00693668	1196.59	399.869	1196.58	399.867	3	6	8.1.1.1361.4
fig|11428.3.peg.4825	0.201349	99	TIAEYGSESDPR		cleaved S-T@N-term	0.000524226	1323.59	662.805	1323.59	662.804	2	12	14.1.1.1597.16
fig|11428.3.peg.4825	0.183096	95.09	SADELIVAHTNETEYR		cleaved I-S@N-term	-0.000755321	1846.87	616.63	1846.87	616.63	3	12	8.1.1.1588.20
fig|11428.3.peg.4825	0.171985	34.51	TDRGAIFAIK		missed R-G@3	0.00125627	1090.61	546.315	1090.61	546.314	2	7	7.1.1.1555.14
fig|11428.3.peg.4825	0.109579	23.73	LREAIQK		missed R-E@2	0.00071968	856.514	429.264	856.513	429.264	2	5	7.1.1.1264.5
fig|11428.3.peg.4825	0.102923	22.51	KIEQHR		missed K-I@1	0.00301787	809.454	405.734	809.451	405.733	2	5	8.1.1.899.2
fig|11428.3.peg.4825	0.090444	20.13	LVEEYFHPSAKR		missed K-R@11	-0.00758806	1474.75	492.59	1474.76	492.593	3	9	9.1.1.1459.12
fig|11428.3.peg.4825	0.0830199	94.38	EYLELVK		cleaved A-E@N-term	-0.0167583	892.474	447.244	892.491	447.253	2	10	6.1.1.1599.3
fig|11428.3.peg.4825	0.0824945	61.52	LIDEHGYN		cleaved N-S@C-term	0.00366882	959.438	480.726	959.435	480.725	2	6	8.1.1.1428.13
fig|11428.3.peg.4825	0.076756	17.31	ISAYARK		missed R-K@6	-0.0122412	807.448	404.731	807.46	404.737	2	3	2.1.1.1376.3
fig|11428.3.peg.4825	0.0245682	89.01	KEYDEIAKKEVQK		missed K-E@1; missed K-K@8; missed K-E@9	1.9902	1608.85	403.219	1606.86	402.721	4	8	7.1.1.1352.4
fig|11428.3.peg.4825	0.015923	58.49	KEYDEIAKKE		cleaved E-V@C-term; missed K-E@1; missed K-K@8; missed K-E@9	0.00148094	1251.64	418.219	1251.63	418.219	3	8	14.1.1.1459.4
fig|11428.3.peg.4825	0.0150229	23.79	ESDVSNVHIAPH		cleaved H-T@C-term	0.00539129	1303.62	435.548	1303.62	435.546	3	8	8.1.1.1427.9
fig|11428.3.peg.4825	0.00788851	91.62	SFIANK			0.0157309	678.386	679.393	678.37	679.377	1	6	7.1.1.1357.19
fig|1428.368.peg.712	2	99	AALDAVVK			0.000167385	785.465	393.74	785.465	393.74	2	13	10.1.1.1593.3
fig|1428.368.peg.712	2	99	AALDAVVKDIPVALR		missed K-D@8	0.00248154	1549.92	517.648	1549.92	517.647	3	25	10.1.1.2635.2
fig|1428.368.peg.712	2	99	AAMQIGITR		cleaved L-A@N-term	-0.0029917	959.519	480.767	959.522	480.768	2	15	13.1.1.1478.5
fig|1428.368.peg.712	2	99	AATTETLDALEHAK		cleaved D-A@N-term	0.00597647	1469.74	490.921	1469.74	490.919	3	15	13.1.1.1537.10
fig|1428.368.peg.712	2	99	ADLVVLDK			-0.00116808	871.5	436.757	871.501	436.758	2	10	11.1.1.1799.4
fig|1428.368.peg.712	2	99	ADLVVLDKNLFEVPVQSMYK		missed K-N@8	0.00692954	2307.23	770.082	2307.22	770.08	3	23	10.1.1.3118.2
fig|1428.368.peg.712	2	99	AIQPSEGER		cleaved F-A@N-term	0.00164253	985.484	493.75	985.483	493.749	2	8	13.1.1.1227.4
fig|1428.368.peg.712	2	99	ALEIAGITK			0.00140895	914.545	458.28	914.544	458.279	2	14	10.1.1.1758.4
fig|1428.368.peg.712	2	99	ALEIAGITKD		cleaved D-T@C-term; missed K-D@9	-0.00141808	1029.57	515.792	1029.57	515.793	2	14	14.1.1.1823.4
fig|1428.368.peg.712	2	99	AYDEQHPGATVIQGHGWSN		cleaved N-T@C-term	0.00103441	2065.93	689.649	2065.92	689.649	3	21	13.1.1.1509.15
fig|1428.368.peg.712	2	99	AYDEQHPGATVIQGHGWSNTIFPSSSPNK			0.0142189	3124.48	782.127	3124.46	782.123	4	21	10.1.1.1983.3
fig|1428.368.peg.712	2	99	DSRHEITHLQLVR		missed R-H@3	0.000355607	1602.86	535.294	1602.86	535.294	3	17	10.1.1.1614.3
fig|1428.368.peg.712	2	99	DSYYDQVVALLGANR			0.00391752	1682.83	842.422	1682.83	842.42	2	25	10.1.1.3481.2
fig|1428.368.peg.712	2	99	DTPNPEGGVIER			-0.00364764	1282.61	642.313	1282.62	642.315	2	15	10.1.1.1592.9
fig|1428.368.peg.712	2	99	DTPNPEGGVIERNQDGEPSGTLR	Deamidated(N)@13	missed R-N@12	-0.00105477	2438.13	813.717	2438.13	813.718	3	16	14.1.1.1724.12
fig|1428.368.peg.712	2	99	EALHYFQSFANK			-0.000276885	1453.7	485.574	1453.7	485.574	3	17	10.1.1.1804.2
fig|1428.368.peg.712	2	99	EALHYFQSFANKNGYTQVK	Deamidated(N)@13	missed K-N@12	0.00411864	2245.08	749.369	2245.08	749.367	3	25	13.1.1.1615.10
fig|1428.368.peg.712	2	99	EIYRHENF		missed R-H@4	0.00237605	1106.52	554.266	1106.51	554.265	2	11	13.1.1.1368.12
fig|1428.368.peg.712	2	99	EQALTIR	Glu->pyro-Glu@N-term		-0.00175573	811.453	406.734	811.455	406.735	2	9	14.1.1.1749.2
fig|1428.368.peg.712	2	99	ETAQNLVLNTLPSFSVNEYK			0.00358341	2266.15	756.391	2266.15	756.39	3	20	10.1.1.3043.2
fig|1428.368.peg.712	2	99	ETAQNLVLNTLPSFSVNEYKEALHYFQSFANK		missed K-E@20	0.02621	3701.86	926.473	3701.84	926.466	4	17	10.1.1.4219.2
fig|1428.368.peg.712	2	99	ETAQNLVLNTLPSFSVNEYKEALHYFQSFANKNGYTQVK	Deamidated(N)@33	missed K-E@20; missed K-N@32	0.0110894	4493.23	899.653	4493.22	899.651	5	24	13.1.1.3577.2
fig|1428.368.peg.712	2	99	EVADTIFVNGK	Ammonia-loss(N)@9		-0.00472931	1174.58	588.298	1174.59	588.301	2	14	10.1.1.1818.4
fig|1428.368.peg.712	2	99	EVADTIFVNGKVYTVEK	Deamidated(N)@9	missed K-V@11	0.00403932	1911.99	638.336	1911.98	638.335	3	19	14.1.1.1896.2
fig|1428.368.peg.712	2	99	FQIHVHSIGDAATTETLDALEHAK			0.00623154	2603.3	651.833	2603.3	651.832	4	29	10.1.1.2367.2
fig|1428.368.peg.712	2	99	GAQTLEEYVQR			-0.00192634	1292.63	647.324	1292.64	647.325	2	18	10.1.1.1748.3
fig|1428.368.peg.712	2	99	GVPIWEK			0.000318867	827.454	414.735	827.454	414.734	2	10	12.1.1.1637.2
fig|1428.368.peg.712	2	99	HEITHLQLVR			-0.00438588	1244.69	623.355	1244.7	623.357	2	17	10.1.1.1592.8
fig|1428.368.peg.712	2	99	HILVENQENIVQALTALEK			0.00425848	2161.18	721.4	2161.17	721.399	3	26	10.1.1.3069.2
fig|1428.368.peg.712	2	99	HILVENQENIVQALTALEKEQALTIR		missed K-E@19	0.0101466	2972.64	991.887	2972.63	991.884	3	30	10.1.1.3300.2
fig|1428.368.peg.712	2	99	HNLTFAIQPSEGER			-0.00198593	1597.78	799.899	1597.78	799.9	2	21	10.1.1.1722.5
fig|1428.368.peg.712	2	99	IIYVGNNTR			6.52963e-05	1048.57	525.291	1048.57	525.291	2	13	14.1.1.1625.17
fig|1428.368.peg.712	2	99	KADLVVLDK		missed K-A@1	0.000627318	999.597	500.806	999.596	500.806	2	15	12.1.1.1495.7
fig|1428.368.peg.712	2	99	KADLVVLDKNLFEVPVQSMYK		missed K-A@1; missed K-N@9	0.00925102	2435.32	609.838	2435.31	609.836	4	25	10.1.1.2746.2
fig|1428.368.peg.712	2	99	KEVADTIFVNGK	Deamidated(N)@10	missed K-E@1	-0.00148912	1320.69	661.353	1320.69	661.354	2	21	13.1.1.1479.7
fig|1428.368.peg.712	2	99	LFMDGVIEGETAYLHEPYQTR		cleaved R-P@C-term	0.00582374	2468.17	823.732	2468.17	823.73	3	18	12.1.1.2815.2
fig|1428.368.peg.712	2	99	LFMDGVIEGETAYLHEPYQTRPGYR			0.00650063	2941.41	736.361	2941.41	736.359	4	15	10.1.1.2570.2
fig|1428.368.peg.712	2	99	LPSFSVNEYK		cleaved T-L@N-term	-0.00210015	1182.59	592.302	1182.59	592.303	2	17	10.1.1.1859.2
fig|1428.368.peg.712	2	99	MIQALDKEK		cleaved N-M@N-term; missed K-E@7	-0.00415636	1074.57	538.292	1074.57	538.294	2	13	14.1.1.1544.7
fig|1428.368.peg.712	2	99	NGYTQVK	Deamidated(N)@1		0.00717871	809.399	405.707	809.392	405.703	2	11	13.1.1.1268.3
fig|1428.368.peg.712	2	99	NLFEVPVQSMYK			0.00024886	1453.73	727.871	1453.73	727.871	2	19	10.1.1.2444.2
fig|1428.368.peg.712	2	99	NNLQGPLVK			-0.00253744	981.558	491.786	981.561	491.788	2	14	10.1.1.1594.4
fig|1428.368.peg.712	2	99	NQDGEPSGTLR			-0.0090977	1172.53	587.274	1172.54	587.278	2	10	11.1.1.1543.4
fig|1428.368.peg.712	2	99	QAYMNMIQALDK	Gln->pyro-Glu@N-term		-0.00190869	1407.65	704.833	1407.65	704.834	2	19	10.1.1.3423.2
fig|1428.368.peg.712	2	99	QAYMNMIQALDKEK	Gln->pyro-Glu@N-term	missed K-E@12	0.00226261	1664.79	833.404	1664.79	833.402	2	19	10.1.1.2922.2
fig|1428.368.peg.712	2	99	QQPWAEAVAISNGK	Gln->pyro-Glu@N-term		-0.000314757	1480.73	741.373	1480.73	741.373	2	22	10.1.1.2731.3
fig|1428.368.peg.712	2	99	RIPYLK		missed R-I@1	-1.80985e-05	788.491	395.253	788.491	395.253	2	9	10.1.1.1601.2
fig|1428.368.peg.712	2	99	RNNLQGPLVK		missed R-N@1	-0.000373639	1137.66	380.228	1137.66	380.228	3	15	10.1.1.1525.2
fig|1428.368.peg.712	2	99	SEDFHSLWVNSK			0.00254102	1447.68	483.566	1447.67	483.565	3	20	10.1.1.1813.3
fig|1428.368.peg.712	2	99	SEEGKKEVADTIFVNGK		cleaved N-S@N-term; missed K-K@5; missed K-E@6	-0.00220527	1849.94	925.977	1849.94	925.978	2	23	10.1.1.1627.17
fig|1428.368.peg.712	2	99	SFFNEGVILASSSDYPVTDGLYFSPLAAMQIGITR			0.010084	3765.87	942.475	3765.86	942.472	4	21	14.1.1.4236.2
fig|1428.368.peg.712	2	99	SHIGATRPEDILNPTER			0.00563313	1904.98	635.999	1904.97	635.997	3	17	10.1.1.1683.5
fig|1428.368.peg.712	2	99	SIGDAATTETLDALEHAK		cleaved H-S@N-term	-0.000564409	1841.9	614.974	1841.9	614.974	3	23	11.1.1.2072.2
fig|1428.368.peg.712	2	99	SYTINGAYANFTDHETGSIK			0.00630181	2188.01	730.345	2188.01	730.343	3	19	10.1.1.1970.2
fig|1428.368.peg.712	2	99	TLGVVGVPQPSWFVK			0.00288582	1612.9	807.458	1612.9	807.456	2	20	10.1.1.2921.3
fig|1428.368.peg.712	2	99	TNILLTLLEGK			0.00155396	1213.73	607.872	1213.73	607.871	2	18	10.1.1.3646.2
fig|1428.368.peg.712	2	99	TNILLTLLEGKEIYR		missed K-E@11	0.00331855	1775.02	592.682	1775.02	592.68	3	22	10.1.1.3445.3
fig|1428.368.peg.712	2	99	TPNPEGGVIER		cleaved D-T@N-term	-0.0035995	1167.58	584.8	1167.59	584.801	2	14	10.1.1.1557.8
fig|1428.368.peg.712	2	99	VGLTDMIK			-0.000211238	875.478	438.747	875.479	438.747	2	13	11.1.1.1949.2
fig|1428.368.peg.712	2	99	VKAYDEQHPGATVIQGHGWSNTIFPSSSPNK		missed K-A@2	0.0109655	3351.64	671.335	3351.63	671.333	5	19	13.1.1.1616.7
fig|1428.368.peg.712	2	99	VKVNGAK	Deamidated(N)@4	cleaved L-V@N-term; missed K-V@2	0.00160127	715.424	358.719	715.423	358.719	2	9	13.1.1.1032.2
fig|1428.368.peg.712	2	99	VYTVEK			0.0014092	737.397	369.706	737.396	369.705	2	7	14.1.1.1471.2
fig|1428.368.peg.712	1.65758	97.97	ERDIQR		missed R-D@2	7.25735e-05	815.425	408.72	815.425	408.72	2	8	14.1.1.1078.2
fig|1428.368.peg.712	1.61979	99	FQIHVH		cleaved H-S@C-term	-0.00105694	779.407	390.711	779.408	390.711	2	9	13.1.1.1396.3
fig|1428.368.peg.712	1.37675	99	TIFPSSSPNK		cleaved N-T@N-term	0.00928974	1076.56	539.287	1076.55	539.282	2	11	13.1.1.1412.4
fig|1428.368.peg.712	1.35655	95.93	DIPVALR			-0.000405963	782.465	392.24	782.465	392.24	2	9	14.1.1.1755.2
fig|1428.368.peg.712	0.939302	99	NSEEGKKEVADTIFVNGK	Deamidated(N)@16	cleaved S-N@N-term; missed K-K@6; missed K-E@7	0.00135291	1964.97	655.997	1964.97	655.997	3	18	14.1.1.1680.18
fig|1428.368.peg.712	0.860121	87.29	HNLTFAIQPSEGERR		missed R-R@14	-0.0116847	1753.87	585.632	1753.89	585.636	3	10	14.1.1.1695.10
fig|1428.368.peg.712	0.545155	99	LDAVVKDI		cleaved A-L@N-term; cleaved I-P@C-term; missed K-D@6	-0.00186434	871.5	436.757	871.501	436.758	2	11	13.1.1.1487.4
fig|1428.368.peg.712	0.527244	99	AYDEQHPGATVIQG		cleaved G-H@C-term	-0.000383158	1484.69	743.352	1484.69	743.352	2	12	14.1.1.1667.24
fig|1428.368.peg.712	0.488117	98.95	AYANFTDHETGSIK		cleaved G-A@N-term	0.0100706	1552.73	518.583	1552.72	518.579	3	13	15.1.1.1655.12
fig|1428.368.peg.712	0.401209	97.31	AYDEQHPGATVIQ		cleaved Q-G@C-term	0.00369631	1427.67	714.843	1427.67	714.841	2	8	14.1.1.1659.23
fig|1428.368.peg.712	0.316953	98.76	DFHSLWVNSK		cleaved E-D@N-term	-0.00389809	1231.59	616.805	1231.6	616.807	2	11	14.1.1.1857.9
fig|1428.368.peg.712	0.139662	97.86	TINGAYANFTDHETGSIK	Deamidated(N)@3	cleaved Y-T@N-term	0.00804992	1938.9	647.309	1938.9	647.306	3	12	14.1.1.1810.13
fig|1428.368.peg.712	0.0840728	99	KKEVADTIFVNGK	Deamidated(N)@11	cleaved G-K@N-term; missed K-K@1; missed K-E@2	-0.00432456	1448.78	725.399	1448.79	725.401	2	12	14.1.1.1633.12
fig|1428.368.peg.712	0.0840728	85.22	PEGGVIER		cleaved N-P@N-term	-7.78806e-05	855.445	428.73	855.445	428.73	2	6	14.1.1.1484.7
fig|1428.368.peg.712	0.0660068	79	FTDHETGSIK		cleaved N-F@N-term	0.00395553	1133.54	378.854	1133.54	378.852	3	6	14.1.1.1484.5
fig|1428.368.peg.712	0.0352691	99	SNSEEGKKEVADTIFVNGK	Deamidated(N)@2; Deamidated(N)@17	cleaved S-S@N-term; missed K-K@7; missed K-E@8	0.00419002	2052.99	685.337	2052.99	685.336	3	12	14.1.1.1741.22
fig|1428.368.peg.712	0.0118872	22.35	MIQALDK		cleaved N-M@N-term	-0.00170542	817.435	409.725	817.437	409.726	2	5	4.1.1.1551.4
fig|1428.368.peg.712	0.00788851	76.52	SEDFHSLWVNSKA	Deamidated(N)@10	cleaved A-L@C-term; missed K-A@12	0.011272	1519.71	760.86	1519.69	760.854	2	11	15.1.1.1802.6
fig|11428.3.peg.4	2	99	AKNTISPSSYYR	Deamidated(N)@3	missed K-N@2	0.00133148	1386.68	463.234	1386.68	463.233	3	15	1.1.1.1475.13
fig|11428.3.peg.4	2	99	AKSINGNFSEPSNTITVK	Deamidated(N)@5	missed K-S@2	-0.00250207	1906.96	636.661	1906.96	636.662	3	17	1.1.1.1562.11
fig|11428.3.peg.4	2	99	ATSLSELCFVGSVR	Carbamidomethyl(C)@8		8.40271e-05	1524.76	763.388	1524.76	763.388	2	24	1.1.1.2012.2
fig|11428.3.peg.4	2	99	DFSDHYPVK		cleaved I-D@N-term	-0.00102096	1106.5	554.258	1106.5	554.259	2	11	2.1.1.1707.13
fig|11428.3.peg.4	2	99	DTNLYASYSDPDGK			-0.00122757	1544.66	773.338	1544.66	773.339	2	16	4.1.1.1702.23
fig|11428.3.peg.4	2	99	DTNLYASYSDPDGKNEHLDFILLR		missed K-N@14	-0.00531786	2795.33	699.841	2795.34	699.842	4	17	4.1.1.2107.3
fig|11428.3.peg.4	2	99	EDAMPSAPK			-0.00325764	944.424	473.219	944.427	473.221	2	9	4.1.1.1482.5
fig|11428.3.peg.4	2	99	ENTDENYMIK			-0.00143126	1255.54	628.776	1255.54	628.777	2	17	2.1.1.1602.21
fig|11428.3.peg.4	2	99	ESDAWPNGDDVIAYPNR	Deamidated(N)@7		0.000495384	1918.83	960.424	1918.83	960.424	2	22	1.1.1.1883.2
fig|11428.3.peg.4	2	99	FLASPTDVNQK		cleaved Y-F@N-term	-0.000599611	1218.62	610.319	1218.62	610.32	2	12	4.1.1.1613.9
fig|11428.3.peg.4	2	99	FVNIGEDGKPEPYG		cleaved G-Y@C-term	0.00489617	1520.72	761.367	1520.71	761.365	2	13	5.1.1.1810.23
fig|11428.3.peg.4	2	99	FVNIGEDGKPEPYGYIDLYYQPSPALGEEK			0.00922493	3387.63	1130.22	3387.62	1130.21	3	22	1.1.1.2218.7
fig|11428.3.peg.4	2	99	FVNIGEDGKPEPYGYIDLYYQPSPALGEEKVR		missed K-V@30	0.00763731	3642.8	911.706	3642.79	911.704	4	20	6.1.1.2034.7
fig|11428.3.peg.4	2	99	GCSVEGIQNK	Carbamidomethyl(C)@2		-0.000884804	1090.51	546.261	1090.51	546.261	2	14	2.1.1.1447.7
fig|11428.3.peg.4	2	99	GCSVEGIQNKGVVYAK	Carbamidomethyl(C)@2	missed K-G@10	-0.0054992	1707.86	854.935	1707.86	854.938	2	22	1.1.1.1484.25
fig|11428.3.peg.4	2	99	GESPAEENYVQIK			-0.00293023	1462.69	732.353	1462.69	732.354	2	16	1.1.1.1539.20
fig|11428.3.peg.4	2	99	GGVAILSK			0.000573854	743.455	372.735	743.454	372.734	2	13	4.1.1.1579.2
fig|11428.3.peg.4	2	99	GLQPDTSYIYSVK			-0.00434398	1469.74	735.875	1469.74	735.877	2	18	1.1.1.1661.7
fig|11428.3.peg.4	2	99	GLQPDTSYIYSVKAKSINGNFSEPSNTITVK	Carbamidomethyl@N-term; Deamidated(N)@18	missed K-A@13; missed K-S@15	-0.0355201	3415.68	1139.57	3415.71	1139.58	3	14	3.1.1.1789.10
fig|11428.3.peg.4	2	99	GNFSEPSNTITVK		cleaved N-G@N-term	-6.97437e-05	1392.69	697.351	1392.69	697.352	2	11	2.1.1.1655.21
fig|11428.3.peg.4	2	99	HIFNNRGCSVEGIQNK	Deamidated(N)@4; Carbamidomethyl(C)@8	missed R-G@6	0.00331149	1872.89	937.454	1872.89	937.452	2	18	2.1.1.1595.15
fig|11428.3.peg.4	2	99	HRLPPENWGNYSNIVEQVK		missed R-L@2	0.00614374	2279.15	570.795	2279.14	570.793	4	21	2.1.1.1841.6
fig|11428.3.peg.4	2	99	INVNGTYIHVFGTHTQSDISFIGCDGPLVR	Deamidated(N)@4; Carbamidomethyl(C)@24		0.00996672	3317.62	830.413	3317.61	830.411	4	21	2.1.1.2450.7
fig|11428.3.peg.4	2	99	IWEETNSSSPPSVEVITGLTFNIK			-0.00353867	2647.33	883.452	2647.34	883.453	3	24	4.1.1.2681.7
fig|11428.3.peg.4	2	99	KGESPAEENYVQIK		cleaved L-K@N-term; missed K-G@1	5.52811e-05	1590.79	531.27	1590.79	531.27	3	14	6.1.1.1468.12
fig|11428.3.peg.4	2	99	KKQLQELADFIEK		missed K-K@1; missed K-Q@2	0.00171912	1588.88	795.449	1588.88	795.448	2	21	2.1.1.1811.10
fig|11428.3.peg.4	2	99	KKQLQELADFIEKK		missed K-K@1; missed K-Q@2; missed K-K@13	0.00240664	1716.98	573.334	1716.98	573.333	3	25	1.1.1.1633.8
fig|11428.3.peg.4	2	99	KNIDFSDHYPVK		missed K-N@1	-0.00246255	1461.72	488.248	1461.73	488.249	3	14	7.1.1.1494.8
fig|11428.3.peg.4	2	99	KQLQELADFIEK		missed K-Q@1	-0.000681811	1460.79	487.936	1460.79	487.936	3	17	4.1.1.1886.2
fig|11428.3.peg.4	2	99	KQLQELADFIEKK		missed K-Q@1; missed K-K@12	-0.000694837	1588.88	795.448	1588.88	795.448	2	15	4.1.1.1833.20
fig|11428.3.peg.4	2	99	LKGESPAEENYVQIK		missed K-G@2	-0.00429726	1703.87	852.942	1703.87	852.944	2	20	1.1.1.1495.23
fig|11428.3.peg.4	2	99	LPPENWGNYSNIVEQVK			0.00132478	1985.99	994	1985.98	994	2	23	1.1.1.2117.4
fig|11428.3.peg.4	2	99	MYFLASPTDVNQK		cleaved N-M@N-term	-0.00144272	1512.73	757.371	1512.73	757.371	2	15	4.1.1.1862.10
fig|11428.3.peg.4	2	99	NEHLDFILLR			-0.0021707	1268.69	423.902	1268.69	423.903	3	15	4.1.1.1955.2
fig|11428.3.peg.4	2	99	NIDFSDHYPVK			-0.00161461	1333.63	667.822	1333.63	667.822	2	15	1.1.1.1570.20
fig|11428.3.peg.4	2	99	NLSSSAHTISTIDLEWEK			0.00522877	2030	677.674	2030	677.672	3	21	4.1.1.1931.5
fig|11428.3.peg.4	2	99	NRENTDENYMIK		cleaved V-N@N-term; missed R-E@2	0.00156278	1525.68	509.569	1525.68	509.568	3	17	1.1.1.1426.9
fig|11428.3.peg.4	2	99	NTISPSSYYR			0.0015772	1186.56	594.289	1186.56	594.288	2	14	2.1.1.1594.13
fig|11428.3.peg.4	2	99	PVLGEGGLDIQR	Carbamidomethyl@N-term	cleaved T-P@N-term	-0.00287517	1309.7	655.855	1309.7	655.857	2	15	3.1.1.1830.10
fig|11428.3.peg.4	2	99	QLQELADFIEK	Gln->pyro-Glu@N-term		-0.00207378	1315.66	658.839	1315.67	658.84	2	18	1.1.1.3067.2
fig|11428.3.peg.4	2	99	QLQELADFIEKK	Gln->pyro-Glu@N-term	missed K-K@11	0.00101288	1443.76	722.888	1443.76	722.888	2	19	1.1.1.2630.2
fig|11428.3.peg.4	2	99	RENTDENYMIK		cleaved N-R@N-term; missed R-E@1	0.00103765	1411.64	471.554	1411.64	471.554	3	16	2.1.1.1527.2
fig|11428.3.peg.4	2	99	SINGNFSEPSNTITVK			-0.00578467	1706.84	854.428	1706.85	854.431	2	18	1.1.1.1604.24
fig|11428.3.peg.4	2	99	STDDIEIIGYVIYQDQNEIK			-0.00842818	2355.14	1178.58	2355.15	1178.58	2	20	4.1.1.2686.5
fig|11428.3.peg.4	2	99	TEPDTMYMISIMTHNMYFLASPTDVNQK			-0.00151909	3277.48	1093.5	3277.48	1093.5	3	16	1.1.1.3033.2
fig|11428.3.peg.4	2	99	THNMYFLASPTDVNQK		cleaved M-T@N-term	0.00252493	1864.88	933.447	1864.88	933.446	2	14	4.1.1.1773.26
fig|11428.3.peg.4	2	99	TLIPIEK			7.0779e-05	812.501	407.258	812.501	407.258	2	9	5.1.1.1749.2
fig|11428.3.peg.4	2	99	TLIPIEKD		missed K-D@7	-0.000884506	927.527	464.771	927.528	464.771	2	11	4.1.1.1702.7
fig|11428.3.peg.4	2	99	TPVLGEGGLDIQR			-0.000118846	1353.73	677.87	1353.73	677.87	2	23	1.1.1.1663.6
fig|11428.3.peg.4	2	99	TVDSATTAYTIK			-0.00324154	1269.64	635.828	1269.65	635.83	2	17	1.1.1.1479.16
fig|11428.3.peg.4	2	99	VCGGMNGTIK	Carbamidomethyl(C)@2; Deamidated(N)@6		-0.00329633	1036.46	519.24	1036.47	519.241	2	15	2.1.1.1482.8
fig|11428.3.peg.4	2	99	VIYQDQNEIK		cleaved Y-V@N-term	-0.00108698	1248.63	625.324	1248.64	625.325	2	11	2.1.1.1568.23
fig|11428.3.peg.4	2	99	VNRENTDENYMIK		cleaved M-V@N-term; missed R-E@3	-0.000696769	1624.75	813.383	1624.75	813.383	2	15	1.1.1.1436.23
fig|11428.3.peg.4	2	99	VVDSECNNVCNQMIQNDR	Carbamidomethyl(C)@6; Carbamidomethyl(C)@10		-0.00121194	2193.92	732.314	2193.92	732.314	3	21	4.1.1.1665.8
fig|11428.3.peg.4	2	99	VVDSECNNVCNQMIQNDRK	Carbamidomethyl(C)@6; Carbamidomethyl(C)@10	missed R-K@18	0.00101194	2322.02	775.013	2322.02	775.012	3	16	1.1.1.1475.24
fig|11428.3.peg.4	2	99	YEKHIFNNR		missed K-H@3	0.00115836	1219.61	407.544	1219.61	407.544	3	7	5.1.1.1489.4
fig|11428.3.peg.4	2	99	YGNFNFR			-0.00172706	916.417	459.216	916.419	459.217	2	11	7.1.1.1597.3
fig|11428.3.peg.4	2	99	YQVIKEDAMPSAPK		missed K-E@5	-0.00111565	1575.8	788.905	1575.8	788.906	2	22	1.1.1.1516.25
fig|11428.3.peg.4	2	99	YQVIKEDAMPSAPKN		cleaved N-L@C-term; missed K-E@5; missed K-N@14	0.00958102	1689.85	564.29	1689.84	564.287	3	15	2.1.1.1640.13
fig|11428.3.peg.4	2	99	YSNIVEQVK		cleaved N-Y@N-term	-0.00252502	1078.56	540.289	1078.57	540.29	2	13	5.1.1.1680.17
fig|11428.3.peg.4	2	99	YTVQISEIK			-0.000384414	1079.59	540.8	1079.59	540.8	2	15	4.1.1.1730.7
fig|11428.3.peg.4	1.92082	98.94	HIFNNR			-0.00130408	799.408	400.711	799.409	400.712	2	6	4.1.1.1366.6
fig|11428.3.peg.4	1.76955	99	WGNYSNIVEQVK		cleaved N-W@N-term	0.0036652	1435.71	718.864	1435.71	718.862	2	14	4.1.1.1866.11
fig|11428.3.peg.4	1.74473	98.4	LRAKNTISPSSYYR		missed R-A@2; missed K-N@4	0.00135161	1654.88	552.634	1654.88	552.634	3	9	1.1.1.1442.16
fig|11428.3.peg.4	1.5376	99	PDGKNEHLDFILLR		cleaved D-P@N-term; missed K-N@4	-0.00035042	1665.88	556.302	1665.88	556.302	3	12	4.1.1.1872.7
fig|11428.3.peg.4	1.5376	97.4	WPIVKYEK		missed K-Y@5	-0.00363496	1061.59	531.801	1061.59	531.803	2	9	1.1.1.1547.9
fig|11428.3.peg.4	0.68403	98.36	GDDVIAYPNR		cleaved N-G@N-term	0.00682356	1118.54	560.279	1118.54	560.275	2	11	5.1.1.1681.15
fig|11428.3.peg.4	0.430626	94.96	TDENYMIK		cleaved N-T@N-term	-0.000239144	1012.45	507.234	1012.45	507.234	2	8	1.1.1.1468.10
fig|11428.3.peg.4	0.249492	88.65	TISPSSYYR		cleaved N-T@N-term	0.00219099	1072.52	537.268	1072.52	537.267	2	9	5.1.1.1690.11
fig|11428.3.peg.4	0.234331	93.61	IDFSDHYPVK		cleaved N-I@N-term	0.0168249	1219.6	610.809	1219.59	610.801	2	10	6.1.1.1555.18
fig|11428.3.peg.4	0.153045	93.28	FSEPSNTITVK		cleaved N-F@N-term	-0.00372248	1221.62	611.817	1221.62	611.819	2	11	7.1.1.1530.18
fig|11428.3.peg.4	0.0565055	97.34	HIFNNRG	Deamidated(N)@4	cleaved G-C@C-term; missed R-G@6	0.000785966	857.415	429.715	857.414	429.714	2	8	1.1.1.1343.6
fig|11428.3.peg.4	0.00480371	95.82	VCGGMNGTIKLK	Carbamidomethyl(C)@2; Ammonia-loss(N)@6	missed K-L@10	-0.00603104	1259.63	630.823	1259.64	630.826	2	12	6.1.1.1558.9
fig|11428.3.peg.4	0.00480371	74.58	VVDSECNNV	Carbamidomethyl(C)@6	cleaved V-C@C-term	0.00168293	1034.44	518.225	1034.43	518.224	2	8	5.1.1.1543.12
fig|11428.3.peg.4	0.00436481	44.64	DDVIAYPNR		cleaved G-D@N-term	0.00418989	1061.52	531.766	1061.51	531.764	2	7	4.1.1.1622.13
fig|11428.3.peg.4	0.00348833	27.44	LIEVLNVI		cleaved Y-L@N-term; cleaved I-E@C-term	-0.00200858	911.567	456.791	911.569	456.792	2	9	2.1.1.1752.3
fig|11428.3.peg.4	0.000434512	92.67	LKGESPAEENYVQIKYQVIKEDAMPSAPKN	Dioxidation(M)@24	cleaved N-L@C-term; missed K-G@2; missed K-Y@15; missed K-E@20; missed K-N@29	0.0589944	3407.75	1136.92	3407.69	1136.9	3	14	1.1.1.1511.26
fig|1428.368.peg.4931	2	99	AINPDTAAK			0.000829302	899.472	450.743	899.471	450.743	2	9	2.1.1.1395.8
fig|1428.368.peg.4931	2	99	AISLAFER			0.000395198	905.497	453.756	905.497	453.756	2	13	11.1.1.1922.3
fig|1428.368.peg.4931	2	99	ATLLAEFIDK			0.00320652	1119.62	560.818	1119.62	560.816	2	17	10.1.1.2732.2
fig|1428.368.peg.4931	2	99	ATLLAEFIDKYK		missed K-Y@10	0.00627062	1410.78	471.268	1410.78	471.266	3	20	10.1.1.2898.2
fig|1428.368.peg.4931	2	99	AVNGDIVKPN		cleaved N-V@C-term	-0.000210863	1025.55	513.783	1025.55	513.783	2	9	12.1.1.1434.7
fig|1428.368.peg.4931	2	99	AVNGDIVKPNVK	Deamidated(N)@3		-0.000788138	1253.7	627.856	1253.7	627.856	2	17	1.1.1.1425.16
fig|1428.368.peg.4931	2	99	DFVYAWQR			0.00045286	1083.51	542.764	1083.51	542.764	2	13	2.1.1.1865.3
fig|1428.368.peg.4931	2	99	DGSDVNAR			-0.00191637	832.366	417.19	832.367	417.191	2	11	12.1.1.1058.2
fig|1428.368.peg.4931	2	99	DPALANK			-0.000831322	727.386	364.7	727.386	364.701	2	8	12.1.1.1285.5
fig|1428.368.peg.4931	2	99	DSIKNMYNHK	Oxidation(M)@6	missed K-N@4	-0.00235737	1264.58	422.536	1264.59	422.536	3	15	12.1.1.1273.2
fig|1428.368.peg.4931	2	99	DTSTPINLYETNAVDR			0.00114909	1807.86	904.937	1807.86	904.937	2	25	10.1.1.1986.3
fig|1428.368.peg.4931	2	99	ELGKNEIELELLNEDVELSK		missed K-N@4	0.00197034	2313.2	772.073	2313.2	772.072	3	24	10.1.1.2762.2
fig|1428.368.peg.4931	2	99	ELGKNEIELELLNEDVELSKK		missed K-N@4; missed K-K@20	0.00276422	2441.29	814.771	2441.29	814.771	3	24	10.1.1.2437.5
fig|1428.368.peg.4931	2	99	EMSPDQLGVK	Dethiomethyl(M)@2		-0.00119508	1054.53	528.271	1054.53	528.272	2	10	10.1.1.1440.5
fig|1428.368.peg.4931	2	99	EVKIEEVNFNIVK		missed K-I@3	0.00533178	1559.86	520.961	1559.86	520.959	3	22	10.1.1.2088.2
fig|1428.368.peg.4931	2	99	FGLEANTTLYNGPF		cleaved F-T@C-term	0.00192848	1542.74	772.376	1542.74	772.375	2	18	11.1.1.2537.2
fig|1428.368.peg.4931	2	99	FGLEANTTLYNGPFTLSDWQHER	Deamidated(N)@11		0.0112964	2696.26	899.761	2696.25	899.758	3	24	1.1.1.2349.2
fig|1428.368.peg.4931	2	99	GDIVKPNVK		cleaved N-G@N-term	-0.00195246	968.563	485.289	968.565	485.29	2	8	10.1.1.1444.4
fig|1428.368.peg.4931	2	99	GKPDFQTVEDTSVFFLR			0.0107679	1985	662.674	1984.99	662.67	3	22	1.1.1.2217.2
fig|1428.368.peg.4931	2	99	IEEVNFNIVK			-0.00202597	1203.65	602.831	1203.65	602.832	2	17	1.1.1.1760.3
fig|1428.368.peg.4931	2	99	IKQQPFAQK	Deamidated(Q)@3	missed K-Q@2	-0.0064539	1087.6	544.805	1087.6	544.809	2	11	10.1.1.1467.4
fig|1428.368.peg.4931	2	99	KAISLAFER		missed K-A@1	-1.42135e-05	1033.59	517.803	1033.59	517.803	2	15	10.1.1.1682.4
fig|1428.368.peg.4931	2	99	KEMSPDQLGVK		missed K-E@1	-0.00210815	1230.63	411.216	1230.63	411.217	3	16	10.1.1.1557.4
fig|1428.368.peg.4931	2	99	KPFVDTLLNNGSK		cleaved K-P@C-term	-0.000164915	1431.77	478.265	1431.77	478.265	3	17	10.1.1.1803.2
fig|1428.368.peg.4931	2	99	KPFVDTLLNNGSKPATGLIPDNFIK	Deamidated(N)@10		0.0111973	2699.46	675.873	2699.45	675.871	4	29	1.1.1.2288.2
fig|1428.368.peg.4931	2	99	KPFVDTLLNNGSKPATGLIPDNFIKGPDKK	Deamidated(N)@10	missed K-G@25; missed K-K@29	0.012036	3224.76	645.959	3224.74	645.956	5	26	10.1.1.2438.9
fig|1428.368.peg.4931	2	99	KQQPFAQK		cleaved I-K@N-term; missed K-Q@1	-0.0014387	973.533	487.774	973.534	487.775	2	8	10.1.1.1427.10
fig|1428.368.peg.4931	2	99	KTGEYLK		missed K-T@1	-0.00192433	837.458	419.736	837.46	419.737	2	10	12.1.1.1296.2
fig|1428.368.peg.4931	2	99	KTGEYLKGELEK		missed K-T@1; missed K-G@7	-0.00234302	1393.74	697.879	1393.75	697.88	2	15	2.1.1.1504.16
fig|1428.368.peg.4931	2	99	KYWEAGK		missed K-Y@1	-0.00269881	880.442	441.228	880.444	441.229	2	8	12.1.1.1388.8
fig|1428.368.peg.4931	2	99	KYWEAGKK		missed K-Y@1; missed K-K@7	-0.00298995	1008.54	505.275	1008.54	505.277	2	13	10.1.1.1384.3
fig|1428.368.peg.4931	2	99	LNQKDPALANK		missed K-D@4	0.000610937	1210.67	404.563	1210.67	404.563	3	16	1.1.1.1297.3
fig|1428.368.peg.4931	2	99	LNQKDPALANKNIR		missed K-D@4; missed K-N@11	0.00585915	1593.9	532.308	1593.9	532.306	3	14	3.1.1.1521.16
fig|1428.368.peg.4931	2	99	LNQKDPALANKNIRK	Deamidated(N)@10	missed K-D@4; missed K-N@11; missed R-K@14	0.00216296	1722.98	431.751	1722.97	431.751	4	11	3.1.1.1488.7
fig|1428.368.peg.4931	2	99	LREDAK		missed R-E@2	-0.00114443	730.396	366.205	730.397	366.206	2	9	12.1.1.980.2
fig|1428.368.peg.4931	2	99	MLLDDAAIVPVYQR			0.000582765	1602.84	802.43	1602.84	802.429	2	24	1.1.1.2118.4
fig|1428.368.peg.4931	2	99	NEIELELLNEDVELSK			-0.00251869	1885.95	943.982	1885.95	943.983	2	19	11.1.1.2418.4
fig|1428.368.peg.4931	2	99	NGDIVKPNVK		cleaved V-N@N-term	-0.00244267	1082.61	542.31	1082.61	542.311	2	15	10.1.1.1526.5
fig|1428.368.peg.4931	2	99	NLLEAEKMLLDDAAIVPVYQR	Oxidation(M)@8	missed K-M@7	0.000980542	2416.27	806.43	2416.27	806.43	3	28	10.1.1.3425.2
fig|1428.368.peg.4931	2	99	NMYNHKYGGDLSFK	Deamidated(N)@4	missed K-Y@6	0.00493704	1673.76	837.885	1673.75	837.883	2	12	3.1.1.1724.24
fig|1428.368.peg.4931	2	99	NQKDPALANK		cleaved L-N@N-term; missed K-D@3	-0.00655321	1097.58	549.795	1097.58	549.799	2	11	10.1.1.1413.5
fig|1428.368.peg.4931	2	99	PALSADAVSSR		cleaved D-P@N-term	-0.00135496	1072.55	537.282	1072.55	537.283	2	17	10.1.1.1555.2
fig|1428.368.peg.4931	2	99	PATGLIPDNFIK		cleaved K-P@N-term	-0.00337174	1284.7	643.36	1284.71	643.361	2	18	11.1.1.2095.3
fig|1428.368.peg.4931	2	99	QQPFAQK	Gln->pyro-Glu@N-term		0.0018586	828.415	415.215	828.413	415.214	2	9	10.1.1.1577.2
fig|1428.368.peg.4931	2	99	QVINLIETQEIPTMDPALSADAVSSR			3.00837	2800.43	934.482	2797.42	933.48	3	23	1.1.1.2364.7
fig|1428.368.peg.4931	2	99	SAYIMYDIK			-0.00309518	1102.53	552.274	1102.54	552.276	2	15	1.1.1.1667.2
fig|1428.368.peg.4931	2	99	SAYIMYDIKNAEK	Deamidated(N)@10	missed K-N@9	-0.00436968	1545.73	773.874	1545.74	773.877	2	19	1.1.1.1632.14
fig|1428.368.peg.4931	2	99	SPSYWENK			-0.000853947	1009.45	505.732	1009.45	505.733	2	12	10.1.1.1580.8
fig|1428.368.peg.4931	2	99	SPSYWENKEVK		missed K-E@8	0.000733046	1365.66	456.226	1365.66	456.226	3	16	10.1.1.1577.4
fig|1428.368.peg.4931	2	99	TGEYLKGELEK		missed K-G@6	-0.000518953	1265.65	633.832	1265.65	633.832	2	19	1.1.1.1466.14
fig|1428.368.peg.4931	2	99	TLSDWQHER		cleaved F-T@N-term	0.00185382	1170.54	586.279	1170.54	586.278	2	15	12.1.1.1494.5
fig|1428.368.peg.4931	2	99	VMTNTMEGLYSLGK			0.00076842	1542.74	772.379	1542.74	772.378	2	23	10.1.1.2210.3
fig|1428.368.peg.4931	2	99	VMTNTMEGLYSLGKDDK		missed K-D@14	0.00987695	1900.9	634.641	1900.89	634.638	3	25	10.1.1.1984.3
fig|1428.368.peg.4931	2	99	VMTNTMEGLYSLGKDDKLVPGVAK	Carbamidomethyl@N-term	missed K-D@14; missed K-L@17	0.00747327	2622.35	656.594	2622.34	656.592	4	14	10.1.1.1772.11
fig|1428.368.peg.4931	2	99	VNGDIVKPNVK	Deamidated(N)@2	cleaved A-V@N-term	-0.00400003	1182.66	592.336	1182.66	592.338	2	12	3.1.1.1591.16
fig|1428.368.peg.4931	2	99	WASVEK			-0.000524655	718.365	360.19	718.365	360.19	2	9	3.1.1.1529.2
fig|1428.368.peg.4931	2	99	WKNLLEAEK		missed K-N@2	0.00313663	1129.62	377.546	1129.61	377.545	3	11	11.1.1.1833.2
fig|1428.368.peg.4931	2	99	YDEIIMK	Dethiomethyl(M)@6		-0.000328324	862.443	432.229	862.444	432.229	2	10	10.1.1.1493.3
fig|1428.368.peg.4931	2	99	YGGDLSFK			-0.000989906	885.422	443.718	885.423	443.719	2	13	10.1.1.1678.2
fig|1428.368.peg.4931	2	99	YSNPKYDEIIMK		missed K-Y@5	-0.00150896	1499.73	750.873	1499.73	750.874	2	19	1.1.1.1567.20
fig|1428.368.peg.4931	1.92082	98.89	NLPGLTVK			0.000147065	840.507	421.261	840.507	421.261	2	9	11.1.1.1823.2
fig|1428.368.peg.4931	1.76955	98.45	NLLEAEK			-0.00270555	815.436	408.725	815.439	408.727	2	11	10.1.1.1553.2
fig|1428.368.peg.4931	1.50864	99	LREDAKWSNGEPVTAK	Deamidated(N)@9	missed R-E@2; missed K-W@6	0.00258401	1800.9	451.233	1800.9	451.232	4	12	1.1.1.1446.6
fig|1428.368.peg.4931	1.14267	99	AIDDYTLEVELDNSIPYLVDLMVYPIFYPVNEK	Carbamidomethyl(D)@20		0.0190391	3946.97	987.749	3946.95	987.744	4	20	11.1.1.3504.2
fig|1428.368.peg.4931	1.02687	97.86	EDAKWSNGEPVTAK	Deamidated(N)@7	missed K-W@4	0.00177084	1531.72	511.58	1531.72	511.579	3	9	2.1.1.1535.16
fig|1428.368.peg.4931	0.886057	97.22	INKKEMSPDQLGVK	Oxidation(M)@6	missed K-K@3; missed K-E@4	-0.00189164	1601.84	534.955	1601.84	534.956	3	8	1.1.1.1331.9
fig|1428.368.peg.4931	0.312471	54.11	NMYNHK			-0.0014425	805.353	403.684	805.354	403.684	2	7	10.1.1.1172.2
fig|1428.368.peg.4931	0.175224	35.79	TGEYLK			-0.00256591	709.362	355.688	709.365	355.69	2	5	11.1.1.1543.2
fig|11428.3.peg.1963	2	99	AALVDGSYHDVDSSEMAFK			0.00110905	2040.91	681.311	2040.91	681.311	3	20	1.1.1.1657.6
fig|11428.3.peg.1963	2	99	AHTDQETGQTIIAGMGE		cleaved E-L@C-term	0.000639146	1757.79	879.902	1757.79	879.902	2	16	2.1.1.1764.24
fig|11428.3.peg.1963	2	99	AMVPLSEMFGYATSLR			-0.00406596	1771.86	886.937	1771.86	886.939	2	24	1.1.1.2703.3
fig|11428.3.peg.1963	2	99	ANVGAPQVAYR		cleaved E-A@N-term	-0.00201607	1144.6	573.306	1144.6	573.307	2	12	13.1.1.1410.18
fig|11428.3.peg.1963	2	99	AREFSLENTR		cleaved M-A@N-term; missed R-E@2	-0.00120674	1221.61	611.812	1221.61	611.812	2	12	1.1.1.1459.13
fig|11428.3.peg.1963	2	99	ATTSVEFFPVICGSAFK	Carbamidomethyl(C)@12		0.00155104	1859.91	930.964	1859.91	930.964	2	22	1.1.1.2342.2
fig|11428.3.peg.1963	2	99	CSPVILEPMMK	Carbamidomethyl(C)@1		3.84287e-05	1303.63	652.824	1303.63	652.824	2	18	2.1.1.1867.3
fig|11428.3.peg.1963	2	99	DTTTGDTLCDEK	Carbamidomethyl(C)@9		-0.00281169	1354.55	678.284	1354.56	678.285	2	12	4.1.1.1473.16
fig|11428.3.peg.1963	2	99	EFKVEANVGAPQVAYR		missed K-V@3	-7.63646e-05	1776.92	593.313	1776.92	593.313	3	22	1.1.1.1621.4
fig|11428.3.peg.1963	2	99	EFSLENTR			0.0113996	994.483	498.249	994.472	498.243	2	8	7.1.1.1538.8
fig|11428.3.peg.1963	2	99	EYIPAVGAGLEDALK			0.000873213	1544.81	773.412	1544.81	773.412	2	18	6.1.1.2033.6
fig|11428.3.peg.1963	2	99	EYIPAVGAGLEDALKNGVLAGYPLVDIK	Deamidated(N)@16	missed K-N@15	0.005614	2885.55	962.857	2885.54	962.855	3	18	1.1.1.2650.5
fig|11428.3.peg.1963	2	99	FKVEANVGAPQVAYR		cleaved E-F@N-term; missed K-V@2	-0.00395073	1647.87	550.297	1647.87	550.298	3	17	1.1.1.1592.10
fig|11428.3.peg.1963	2	99	GIMAHIDAGK		cleaved I-G@N-term	0.00247867	1011.52	506.767	1011.52	506.766	2	9	3.1.1.1757.4
fig|11428.3.peg.1963	2	99	GITITSAATTAQWK			-0.0035435	1447.76	724.889	1447.77	724.891	2	23	1.1.1.1672.2
fig|11428.3.peg.1963	2	99	GNAQVVR			-0.00132263	742.407	372.211	742.409	372.212	2	9	1.1.1.1194.3
fig|11428.3.peg.1963	2	99	GRVEGMEAR		missed R-V@2	1.5959e-05	1003.49	502.751	1003.49	502.751	2	10	1.1.1.1271.8
fig|11428.3.peg.1963	2	99	GTFSMVFDHYEEVPK			0.0028019	1784.81	595.944	1784.81	595.943	3	20	1.1.1.1959.2
fig|11428.3.peg.1963	2	99	GTLPDTDEEVER			0.00107065	1359.62	680.816	1359.62	680.815	2	16	1.1.1.1468.16
fig|11428.3.peg.1963	2	99	GTLPDTDEEVERK		missed R-K@12	-0.00145747	1487.71	744.862	1487.71	744.862	2	15	2.1.1.1523.9
fig|11428.3.peg.1963	2	99	GVQILLDAVIDYLPSPLDVPAIK			0.00110199	2448.39	817.137	2448.39	817.137	3	24	1.1.1.3880.2
fig|11428.3.peg.1963	2	99	IAASMALK			-0.00210304	803.455	402.735	803.458	402.736	2	9	7.1.1.1472.4
fig|11428.3.peg.1963	2	99	IGADFLYSVGTIHDR			0.00348852	1662.84	555.287	1662.84	555.286	3	25	1.1.1.1962.2
fig|11428.3.peg.1963	2	99	IGETHEGASQMDWMEQEQER			-7.09077e-05	2389.99	797.671	2389.99	797.671	3	20	1.1.1.1604.23
fig|11428.3.peg.1963	2	99	ILQMHANSR			0.00196064	1068.55	357.191	1068.55	357.191	3	8	13.1.1.1293.3
fig|11428.3.peg.1963	2	99	ILYYTGR			0.000849928	884.477	443.245	884.476	443.245	2	10	4.1.1.1637.4
fig|11428.3.peg.1963	2	99	IMTDPYVGK			-0.00179679	1022.51	512.262	1022.51	512.263	2	15	2.1.1.1633.5
fig|11428.3.peg.1963	2	99	IVFVNKMDK		missed K-M@6	-0.00108169	1092.6	365.207	1092.6	365.207	3	11	6.1.1.1473.2
fig|11428.3.peg.1963	2	99	IVGGVVPR			5.69063e-05	795.497	398.756	795.497	398.756	2	12	1.1.1.1442.7
fig|11428.3.peg.1963	2	99	KSSDEEPFAALAFK		missed K-S@1	0.00161847	1538.76	770.389	1538.76	770.388	2	24	1.1.1.1865.2
fig|11428.3.peg.1963	2	99	KVEANVGAPQVAYR		cleaved F-K@N-term; missed K-V@1	0.00480693	1500.81	501.277	1500.8	501.276	3	14	6.1.1.1448.13
fig|11428.3.peg.1963	2	99	LIEAVAELDEEMMMK			-0.00577433	1750.81	876.414	1750.82	876.417	2	24	1.1.1.2426.2
fig|11428.3.peg.1963	2	99	LQANAHPIQLPIGAEDEFNGIIDLVEECAYMYGNDLGTDIQR	Carbamidomethyl(C)@28		-0.00816625	4702.22	1176.56	4702.23	1176.57	4	28	4.1.1.3787.5
fig|11428.3.peg.1963	2	99	LSEEDPTFR			-0.00073387	1092.51	547.261	1092.51	547.262	2	13	1.1.1.1485.17
fig|11428.3.peg.1963	2	99	MDKIGADFLYSVGTIHDR		missed K-I@3	0.0032978	2037	510.258	2037	510.257	4	24	4.1.1.1957.2
fig|11428.3.peg.1963	2	99	MGTALSKLSEEDPTFR		missed K-L@7	-0.000104781	1780.87	594.629	1780.87	594.629	3	13	2.1.1.1781.5
fig|11428.3.peg.1963	2	99	NGVLAGYPLVDIK			-0.0023379	1357.76	679.886	1357.76	679.888	2	18	6.1.1.1996.4
fig|11428.3.peg.1963	2	99	NIGIMAHIDAGK			-0.00192711	1238.64	620.328	1238.64	620.329	2	20	1.1.1.1582.9
fig|11428.3.peg.1963	2	99	NIGIMAHIDAGKTTATER		missed K-T@12	-0.00108676	1897.97	475.499	1897.97	475.499	4	16	1.1.1.1547.6
fig|11428.3.peg.1963	2	99	NKGVQILLDAVIDYLPSPLDVPAIK		missed K-G@2	0.00985197	2690.54	897.852	2690.53	897.849	3	25	6.1.1.2937.3
fig|11428.3.peg.1963	2	99	QATTYGVPR	Gln->pyro-Glu@N-term		2.12323e-06	974.482	488.248	974.482	488.248	2	14	4.1.1.1652.5
fig|11428.3.peg.1963	2	99	REFKVEANVGAPQVAYR		missed R-E@1; missed K-V@4	-0.00353102	1933.01	645.345	1933.02	645.346	3	16	2.1.1.1684.17
fig|11428.3.peg.1963	2	99	SKADQDKMGTALSK		missed K-A@2; missed K-M@7	0.00252725	1478.74	493.921	1478.74	493.921	3	18	1.1.1.1302.2
fig|11428.3.peg.1963	2	99	SLVILESMEFPEPVIS		cleaved S-V@C-term	-0.00172418	1788.92	895.467	1788.92	895.468	2	19	1.1.1.3034.2
fig|11428.3.peg.1963	2	99	SSDEEPFAALAFK			-0.00232551	1410.66	706.34	1410.67	706.341	2	22	1.1.1.2109.2
fig|11428.3.peg.1963	2	99	SVSEEIIK			-0.0036245	903.488	452.751	903.491	452.753	2	7	7.1.1.1474.7
fig|11428.3.peg.1963	2	99	SVSEEIIKK		missed K-K@8	-0.0025788	1031.58	516.799	1031.59	516.8	2	13	2.1.1.1492.18
fig|11428.3.peg.1963	2	99	VEANVGAPQVAYR			-0.00113851	1372.71	687.362	1372.71	687.362	2	16	1.1.1.1511.15
fig|11428.3.peg.1963	2	99	VEGMEAR			0.00134435	790.366	396.19	790.364	396.189	2	8	1.1.1.1279.3
fig|11428.3.peg.1963	2	99	VEIPEEHKELAEEYR		missed K-E@8	0.00402031	1869.91	468.486	1869.91	468.485	4	19	1.1.1.1516.5
fig|11428.3.peg.1963	2	99	VEIPEEHKELAEEYRGK		missed K-E@8; missed R-G@15	-0.00687802	2055.02	1028.52	2055.03	1028.52	2	18	1.1.1.1479.26
fig|11428.3.peg.1963	2	99	VEVVIPEEYMGDIMGDVTSR			0.00464144	2238.06	1120.04	2238.05	1120.03	2	22	1.1.1.2620.3
fig|11428.3.peg.1963	2	99	VEVVIPEEYMGDIMGDVTSRR		missed R-R@20	-0.000185319	2394.16	799.059	2394.16	799.059	3	14	6.1.1.2208.3
fig|11428.3.peg.1963	2	99	VGAPQVAYR		cleaved N-V@N-term	0.000567932	959.519	480.767	959.519	480.767	2	9	3.1.1.1610.12
fig|11428.3.peg.1963	2	99	VLDGAVAVLDAQSGVEPQTETVWR			0.00646425	2539.3	847.44	2539.29	847.438	3	27	1.1.1.2255.5
fig|11428.3.peg.1963	2	99	VNIIDTPGHVDFTVEVER			0.000861891	2039.03	680.685	2039.03	680.685	3	23	1.1.1.1961.2
fig|11428.3.peg.1963	2	99	VYSGVLNSGSYVK			-0.00149324	1371.7	686.858	1371.7	686.859	2	21	1.1.1.1597.5
fig|11428.3.peg.1963	2	99	VYSGVLNSGSYVKN	Deamidated(N)@7	cleaved N-S@C-term; missed K-N@13	-0.000425849	1486.73	744.372	1486.73	744.372	2	13	3.1.1.1743.21
fig|11428.3.peg.1963	2	99	VYSGVLNSGSYVKNSTK		missed K-N@13	0.00298743	1801.92	901.969	1801.92	901.968	2	17	1.1.1.1508.26
fig|11428.3.peg.1963	2	99	YLEGEEITVEELK			-0.00179333	1550.77	776.392	1550.77	776.393	2	23	1.1.1.1848.2
fig|11428.3.peg.1963	1.40894	96.52	REFSLENTR		cleaved A-R@N-term; missed R-E@1	0.000623507	1150.57	384.532	1150.57	384.532	3	7	5.1.1.1625.4
fig|11428.3.peg.1963	0.539102	73.52	GFEFENK			0.00201002	869.394	435.704	869.392	435.703	2	6	8.1.1.1529.3
fig|11428.3.peg.1963	0.482804	90.7	IVFVNK	Deamidated(N)@5		-0.00183553	719.42	360.717	719.422	360.718	2	5	2.1.1.1620.2
fig|11428.3.peg.1963	0.316053	54.64	MGTALSK			-0.00232882	706.366	354.19	706.368	354.191	2	4	1.1.1.1292.2
fig|11428.3.peg.1963	0.163676	83.21	PEEHKELAEEYRGK		cleaved I-P@N-term; missed K-E@5; missed R-G@12	0.00149269	1713.83	572.285	1713.83	572.285	3	9	1.1.1.1481.13
fig|11428.3.peg.1963	0.0560111	84.63	DWMEQEQER		cleaved M-D@N-term	-0.000247439	1249.5	625.759	1249.5	625.759	2	8	15.1.1.1692.19
fig|11428.3.peg.1963	0.0338583	93.19	SGVEPQTETVWR		cleaved Q-S@N-term	-0.0181122	1387.66	694.835	1387.67	694.844	2	10	1.1.1.1568.18
fig|11428.3.peg.1963	0.032452	26.84	AGDIAAAVGLK		cleaved Y-A@N-term	0.00914931	984.57	493.292	984.56	493.287	2	5	5.1.1.1554.16
fig|11428.3.peg.1963	0.0231917	94.56	IGETHEGASQMD		cleaved D-W@C-term	-0.00209898	1273.52	637.769	1273.52	637.77	2	8	1.1.1.1334.8
fig|11428.3.peg.1963	0.00217692	58.17	MDWMEQEQER		cleaved Q-M@N-term	-0.000807581	1380.54	691.279	1380.54	691.279	2	9	2.1.1.1730.20
fig|11428.3.peg.2209	2	99	AHEIQGVLALENSLNR			-0.00496379	1762.93	588.65	1762.93	588.651	3	27	1.1.1.1924.2
fig|11428.3.peg.2209	2	99	ANAVQVHFK		cleaved I-A@N-term	-0.00319947	1012.54	507.278	1012.55	507.28	2	9	5.1.1.1764.10
fig|11428.3.peg.2209	2	99	DALLEEITDYVLNK			0.00231421	1634.84	818.429	1634.84	818.427	2	24	1.1.1.3328.2
fig|11428.3.peg.2209	2	99	DALLEEITDYVLNKEVTSAEAFSTAR		missed K-E@14	0.0108304	2884.45	962.489	2884.43	962.485	3	27	1.1.1.3526.2
fig|11428.3.peg.2209	2	99	DGTVTENVECEYPLGHR	Carbamidomethyl(C)@10		-0.00472985	1974.87	988.442	1974.87	988.444	2	23	1.1.1.1592.19
fig|11428.3.peg.2209	2	99	EEIFNALSHAWIDNSSLR			-0.00320998	2101.02	1051.52	2101.02	1051.52	2	22	6.1.1.2145.5
fig|11428.3.peg.2209	2	99	ERLDEIDR		missed R-L@2	-0.000211905	1044.52	523.267	1044.52	523.267	2	11	4.1.1.1502.7
fig|11428.3.peg.2209	2	99	ERLDEIDRITITTHESAIR		missed R-L@2; missed R-I@8	-0.000433469	2267.19	567.804	2267.19	567.804	4	17	1.1.1.1625.9
fig|11428.3.peg.2209	2	99	EVLEMMIK			0.0258928	991.534	992.541	991.508	992.516	1	13	2.1.1.1852.6
fig|11428.3.peg.2209	2	99	EVTSAEAFSTAR			0.000204804	1267.6	634.81	1267.6	634.81	2	17	1.1.1.1493.17
fig|11428.3.peg.2209	2	99	FTANMAGHYSSK	Oxidation(M)@5		-0.00135103	1328.58	443.868	1328.58	443.868	3	12	1.1.1.1322.5
fig|11428.3.peg.2209	2	99	GAFNIGCMIR	Carbamidomethyl(C)@7		-0.00202378	1137.54	569.777	1137.54	569.778	2	16	1.1.1.1947.2
fig|11428.3.peg.2209	2	99	GDIVADDYEDAVAND		cleaved D-P@C-term	0.00109208	1580.65	791.332	1580.65	791.331	2	14	4.1.1.1862.11
fig|11428.3.peg.2209	2	99	GDIVADDYEDAVANDPR			0.00101674	1833.8	917.909	1833.8	917.908	2	26	1.1.1.1667.3
fig|11428.3.peg.2209	2	99	GDIVADDYEDAVANDPRVDELR		missed R-V@17	0.00178226	2446.13	816.383	2446.12	816.382	3	20	4.1.1.1910.6
fig|11428.3.peg.2209	2	99	GEMGYPTALSAPGWGFQDVLFNK			0.00235375	2484.18	829.067	2484.18	829.067	3	25	1.1.1.2689.2
fig|11428.3.peg.2209	2	99	GEMGYPTALSAPGWGFQDVLFNKQELK		missed K-Q@23	0.00915716	2982.47	995.163	2982.46	995.16	3	16	1.1.1.2480.5
fig|11428.3.peg.2209	2	99	GTSYVLDPVK		cleaved P-G@N-term	-0.00024123	1077.57	539.793	1077.57	539.793	2	11	5.1.1.1763.16
fig|11428.3.peg.2209	2	99	GVHLAMTALK			-0.00204383	1039.58	520.799	1039.58	520.8	2	15	1.1.1.1542.13
fig|11428.3.peg.2209	2	99	GVHLAMTALKGEMGYPTALSAPGWGFQDVLFNK		missed K-G@10	0.0127326	3505.77	877.449	3505.75	877.445	4	25	6.1.1.2247.4
fig|11428.3.peg.2209	2	99	HAPNTGSRKSWAAGDATSR		missed R-K@8; missed K-S@9	0.00468368	1968.96	493.246	1968.95	493.245	4	10	1.1.1.1295.2
fig|11428.3.peg.2209	2	99	IIDKEGPLNN		cleaved N-P@C-term; missed K-E@4	-0.00409193	1111.58	556.799	1111.59	556.801	2	13	3.1.1.1603.19
fig|11428.3.peg.2209	2	99	IIDKEGPLNNPADR		missed K-E@4	-0.00176848	1550.8	776.409	1550.81	776.41	2	12	2.1.1.1575.19
fig|11428.3.peg.2209	2	99	IIDKEGPLNNPADRDH		cleaved H-C@C-term; missed K-E@4; missed R-D@14	0.00723224	1802.9	451.732	1802.89	451.73	4	12	3.1.1.1591.8
fig|11428.3.peg.2209	2	99	IIDKEGPLNNPADRDHCLQYITAIGLLK	Carbamidomethyl(C)@17	missed K-E@4; missed R-D@14	0.0112098	3176.68	636.343	3176.67	636.34	5	33	1.1.1.2083.3
fig|11428.3.peg.2209	2	99	IKTNEIK		cleaved M-I@N-term; missed K-T@2	0.000147274	844.502	423.258	844.502	423.258	2	8	1.1.1.1246.3
fig|11428.3.peg.2209	2	99	ISEGKEALK		missed K-E@5	-0.00215448	973.542	487.778	973.544	487.779	2	11	1.1.1.1275.7
fig|11428.3.peg.2209	2	99	ITITTHESAIR			-0.000421306	1240.68	621.346	1240.68	621.346	2	14	1.1.1.1464.5
fig|11428.3.peg.2209	2	99	KSWAAGDATSR		missed K-S@1	0.000450465	1148.56	575.286	1148.56	575.286	2	13	1.1.1.1319.10
fig|11428.3.peg.2209	2	99	LARPLESYVMENVLFK			0.00577598	1908.02	637.015	1908.02	637.013	3	22	1.1.1.2255.3
fig|11428.3.peg.2209	2	99	LDEIDRITITTHESAIR		missed R-I@6	-0.0121172	1982.03	661.684	1982.04	661.688	3	20	1.1.1.1628.9
fig|11428.3.peg.2209	2	99	LENMNVNEFVDLFLI			-0.00561384	1808.9	905.455	1808.9	905.458	2	13	4.1.1.3997.2
fig|11428.3.peg.2209	2	99	LHPEIK			-0.00185698	735.426	368.72	735.428	368.721	2	8	4.1.1.1380.2
fig|11428.3.peg.2209	2	99	LHPEIKER		missed K-E@6	0.000989829	1020.57	511.294	1020.57	511.293	2	7	2.1.1.1381.6
fig|11428.3.peg.2209	2	99	LLGPVVPGTIVPNGTR	Deamidated(N)@13		-0.000103382	1589.91	795.964	1589.91	795.964	2	24	1.1.1.1987.2
fig|11428.3.peg.2209	2	99	MLGGTREEIFNALSHAWIDNSSLR		missed R-E@6	0.00699009	2716.35	906.456	2716.34	906.454	3	23	1.1.1.2384.4
fig|11428.3.peg.2209	2	99	MVVVENK			0.00325856	817.44	409.727	817.437	409.726	2	8	13.1.1.1295.5
fig|11428.3.peg.2209	2	99	MVVVENKQYSLDYLDPNKR	Deamidated(N)@6	missed K-Q@7; missed K-R@18	0.00361069	2311.16	578.796	2311.15	578.795	4	21	2.1.1.1847.5
fig|11428.3.peg.2209	2	99	PLESYVMENVLFK		cleaved R-P@N-term	0.00237873	1567.8	784.906	1567.8	784.905	2	23	1.1.1.2357.2
fig|11428.3.peg.2209	2	99	QKDALLEEITDYVLNK	Gln->pyro-Glu@N-term	missed K-D@2	0.00159621	1873.97	937.992	1873.97	937.991	2	23	1.1.1.3185.2
fig|11428.3.peg.2209	2	99	QKDALLEEITDYVLNKEVTSAEAFSTAR	Gln->pyro-Glu@N-term	missed K-D@2; missed K-E@16	0.00448948	3123.57	1042.2	3123.56	1042.19	3	24	6.1.1.2801.3
fig|11428.3.peg.2209	2	99	QQEQIHEVCLNEEK	Gln->pyro-Glu@N-term; Carbamidomethyl(C)@9		0.00583402	1765.8	883.907	1765.79	883.904	2	16	1.1.1.1565.25
fig|11428.3.peg.2209	2	99	QQEQIHEVCLNEEKLENMNVNEFVDLFLI	Carbamidomethyl(C)@9	missed K-L@14	0.000395458	3573.71	894.435	3573.71	894.435	4	17	4.1.1.3231.2
fig|11428.3.peg.2209	2	99	QYSLDYLDPNKR	Gln->pyro-Glu@N-term	missed K-R@11	-0.00125808	1493.71	747.864	1493.72	747.865	2	18	1.1.1.1928.2
fig|11428.3.peg.2209	2	99	RDEAIPK		missed R-D@1	-0.00157389	827.448	414.731	827.45	414.732	2	7	1.1.1.1251.2
fig|11428.3.peg.2209	2	99	SIANAVQVHFK	Deamidated(N)@4		-0.00113815	1213.64	607.83	1213.65	607.83	2	19	1.1.1.1629.11
fig|11428.3.peg.2209	2	99	SIANAVQVHFKDGTVTENVECEYPLGHR	Carbamidomethyl(C)@21	missed K-D@11	0.000247784	3169.53	793.389	3169.53	793.389	4	22	2.1.1.1849.10
fig|11428.3.peg.2209	2	99	SWAAGDATSR			0.00262388	1020.47	511.24	1020.46	511.239	2	14	1.1.1.1389.6
fig|11428.3.peg.2209	2	99	TANMAGHYSSK		cleaved F-T@N-term	-0.000649009	1165.52	583.766	1165.52	583.767	2	10	2.1.1.1530.7
fig|11428.3.peg.2209	2	99	VATTAVVAK			0.000502186	858.518	430.266	858.517	430.266	2	13	1.1.1.1316.8
fig|11428.3.peg.2209	2	99	VGLDHVLYVK			-0.00328769	1141.65	571.83	1141.65	571.832	2	15	1.1.1.1611.13
fig|11428.3.peg.2209	2	99	VPGTSYVLDPVK			-0.00157543	1273.69	637.852	1273.69	637.853	2	21	1.1.1.1637.7
fig|11428.3.peg.2209	2	99	VREVLEMMIK		missed R-E@2	-0.000614239	1246.68	624.346	1246.68	624.346	2	16	1.1.1.1684.2
fig|11428.3.peg.2209	2	99	VSYPAEFHAQTAAE		cleaved E-C@C-term	-0.000894423	1519.69	760.854	1519.69	760.854	2	13	3.1.1.1750.20
fig|11428.3.peg.2209	2	99	VSYPAEFHAQTAAECAVK	Carbamidomethyl(C)@15		-0.00342094	1977.92	989.968	1977.93	989.97	2	26	1.1.1.1578.19
fig|11428.3.peg.2209	2	99	WLDYNDTWLAAEWGHPSDNLGGILAVADYISR			-0.00159844	3617.72	1206.91	3617.72	1206.91	3	23	4.1.1.3420.2
fig|11428.3.peg.2209	2	99	YVLLDTLGCGILALQYPECTK	Carbamidomethyl(C)@9; Carbamidomethyl(C)@19		0.00140493	2426.22	809.749	2426.22	809.748	3	24	2.1.1.3236.2
fig|11428.3.peg.2209	1.88606	98.84	VDELRNKMVVVENK		missed R-N@5; missed K-M@7	-0.00904944	1671.89	418.979	1671.9	418.982	4	9	6.1.1.1461.6
fig|11428.3.peg.2209	1.61979	97.88	LHPEIKERLDEIDR		missed K-E@6; missed R-L@8	0.000896536	1761.94	588.32	1761.94	588.32	3	11	3.1.1.1693.5
fig|11428.3.peg.2209	1.58503	97.69	FRRDEAIPK		missed R-R@2; missed R-D@3	-0.0010869	1130.62	377.88	1130.62	377.88	3	7	2.1.1.1434.6
fig|11428.3.peg.2209	1.13077	98.37	LLGPVVPGTIVPNGTRVPGTSYVLDPVK	Deamidated(N)@13	missed R-V@16	0.0118279	2845.61	949.543	2845.6	949.539	3	12	9.1.1.2527.6
fig|11428.3.peg.2209	0.754487	99	GLDHVLYVK		cleaved V-G@N-term	0.000523445	1042.58	522.298	1042.58	522.298	2	12	13.1.1.1572.4
fig|11428.3.peg.2209	0.511449	71.88	LDEIDR			-0.000436813	759.376	380.695	759.376	380.695	2	5	1.1.1.1339.2
fig|11428.3.peg.2209	0.177178	36.46	ISEGKEALKVR		missed K-E@5; missed K-V@9	-0.0015756	1228.71	410.578	1228.71	410.579	3	5	6.1.1.1333.4
fig|11428.3.peg.2209	0.131944	28.73	NKMVVVENK		missed K-M@2	-0.00681602	1059.57	354.197	1059.57	354.199	3	5	6.1.1.1299.2
fig|11428.3.peg.2209	0.0604807	90.13	ANMAGHYSSK		cleaved T-A@N-term	0.00819766	1064.48	533.247	1064.47	533.243	2	7	5.1.1.1591.10
fig|1428.368.peg.1087	2	99	AELKGEFFETNLYTVQTNAK		missed K-G@4	-0.00525539	2302.14	768.388	2302.15	768.39	3	20	11.1.1.2051.5
fig|1428.368.peg.1087	2	99	AIISNANNSEETQDIFMNVIPAEK			0.00669015	2647.29	883.436	2647.28	883.434	3	25	10.1.1.2842.4
fig|1428.368.peg.1087	2	99	AINEPLLIDGK			0.00265891	1181.67	591.841	1181.67	591.84	2	17	10.1.1.1819.4
fig|1428.368.peg.1087	2	99	AINEPLLIDGKEVTAETK		missed K-E@11	-0.00153463	1940.05	647.689	1940.05	647.69	3	23	10.1.1.1815.2
fig|1428.368.peg.1087	2	99	APTGYVSGDKPQTIEVK			-0.00695224	1788.92	895.467	1788.93	895.47	2	22	10.1.1.1625.13
fig|1428.368.peg.1087	2	99	ASPNGYVLIK			0.000804374	1060.59	531.303	1060.59	531.303	2	11	15.1.1.1743.12
fig|1428.368.peg.1087	2	99	DAITIQDKVEYTNLVVGK		missed K-V@8	0.000660463	2005.07	669.365	2005.07	669.365	3	23	11.1.1.2034.4
fig|1428.368.peg.1087	2	99	DLQVGKEYTLK		missed K-E@6	0.000749102	1292.7	431.907	1292.7	431.906	3	11	14.1.1.1734.3
fig|1428.368.peg.1087	2	99	ENGIANVEGLTYGK			-0.00443741	1463.72	732.868	1463.73	732.87	2	23	10.1.1.1813.19
fig|1428.368.peg.1087	2	99	EPIVFEIK			-0.00202623	973.546	487.781	973.548	487.781	2	13	14.1.1.1971.2
fig|1428.368.peg.1087	2	99	EVKPEQPKPNQPKPDQPHPDK			0.00390851	2432.25	487.457	2432.24	487.456	5	14	18.1.1.1423.5
fig|1428.368.peg.1087	2	99	EVVVFEDLLHEGQVIATHADINDVGQTVR			0.0021848	3202.63	801.664	3202.63	801.664	4	23	11.1.1.2722.4
fig|1428.368.peg.1087	2	99	EVVVFEELLK			0.0013028	1203.68	602.846	1203.68	602.845	2	14	11.1.1.2437.2
fig|1428.368.peg.1087	2	99	FKEVKPE		cleaved E-Q@C-term; missed K-E@2	-0.00223112	875.473	438.744	875.475	438.745	2	9	12.1.1.1342.3
fig|1428.368.peg.1087	2	99	FKEVKPEQPKP		cleaved P-N@C-term; missed K-E@2	-8.53387e-05	1325.73	442.919	1325.73	442.919	3	9	10.1.1.1464.3
fig|1428.368.peg.1087	2	99	FKEVKPEQPKPNQPKPDQPHPDK		missed K-E@2	-0.000711935	2707.41	677.859	2707.41	677.859	4	15	16.1.1.1443.4
fig|1428.368.peg.1087	2	99	FVEPSIK			0.00105486	818.455	410.235	818.454	410.234	2	8	17.1.1.1676.3
fig|1428.368.peg.1087	2	99	FVEPSIKT		cleaved T-T@C-term; missed K-T@7	0.00225518	919.504	460.759	919.501	460.758	2	12	12.1.1.1600.2
fig|1428.368.peg.1087	2	99	FVTIQDKVEYK		missed K-V@7	-0.00270682	1368.73	457.249	1368.73	457.25	3	16	10.1.1.1688.4
fig|1428.368.peg.1087	2	99	GEFFETNLYTVQTNAK			-0.0025727	1860.89	931.451	1860.89	931.452	2	23	10.1.1.2286.3
fig|1428.368.peg.1087	2	99	GTDTVQNATVLLER	Deamidated(Q)@6		0.00186394	1516.78	759.395	1516.77	759.394	2	18	2.1.1.1859.7
fig|1428.368.peg.1087	2	99	ITTGADGTAELNNLQIGTYTVK			-0.00618689	2279.16	760.727	2279.16	760.729	3	17	11.1.1.2079.3
fig|1428.368.peg.1087	2	99	IVSENGEVR			-0.00694041	1001.51	501.761	1001.51	501.764	2	14	11.1.1.1533.2
fig|1428.368.peg.1087	2	99	IVSENGEVRDQLSVGEK		missed R-D@9	0.00499602	1857.95	620.323	1857.94	620.322	3	18	10.1.1.1645.5
fig|1428.368.peg.1087	2	99	KLEGAVFELK		missed K-L@1	-0.00368239	1132.65	567.33	1132.65	567.332	2	16	10.1.1.1767.5
fig|1428.368.peg.1087	2	99	KPLVVDGKEVTVESK		missed K-E@8	-0.00281739	1626.92	543.313	1626.92	543.314	3	23	10.1.1.1599.5
fig|1428.368.peg.1087	2	99	KVVTKENGIANVEGLTYGK	Deamidated(N)@7	missed K-V@1; missed K-E@5	-0.00122202	2020.08	674.368	2020.08	674.369	3	17	14.1.1.1760.9
fig|1428.368.peg.1087	2	99	NEAHYATQLAVWNALGQLDVNELKHENK		missed K-H@24	0.0336184	3204.63	802.164	3204.6	802.156	4	28	15.1.1.2480.5
fig|1428.368.peg.1087	2	99	NSSGQIAYCLTLGLK	Carbamidomethyl(C)@9		-0.00158756	1623.83	812.921	1623.83	812.922	2	23	10.1.1.2437.4
fig|1428.368.peg.1087	2	99	SPNGEDLPEMGK			0.00202132	1272.57	637.291	1272.57	637.29	2	15	4.1.1.1620.17
fig|1428.368.peg.1087	2	99	SPNGEDLPEMGKTDNVVYK		missed K-T@12	0.00321731	2091.98	698.335	2091.98	698.333	3	27	10.1.1.1727.7
fig|1428.368.peg.1087	2	99	STEQLGVANK			-0.00820444	1045.53	523.773	1045.54	523.777	2	14	10.1.1.1461.8
fig|1428.368.peg.1087	2	99	STEQLGVANKNEAHYATQLAVWNALGQLDVNELKHENK		missed K-N@10; missed K-H@34	0.0219352	4232.15	847.437	4232.12	847.432	5	22	12.1.1.2766.23
fig|1428.368.peg.1087	2	99	SVTIQDKVEYK		missed K-V@7	-0.00319949	1308.69	437.237	1308.69	437.238	3	16	10.1.1.1585.2
fig|1428.368.peg.1087	2	99	SVTIQDKVEYKDLQVGK		missed K-V@7; missed K-D@11	0.00110648	1949.05	488.269	1949.05	488.269	4	15	10.1.1.1711.3
fig|1428.368.peg.1087	2	99	TDNVVYK			-0.00529356	837.418	419.716	837.423	419.719	2	10	10.1.1.1435.3
fig|1428.368.peg.1087	2	99	TGEFNLSVAANLTK			0.000802516	1463.76	732.889	1463.76	732.888	2	25	10.1.1.2288.9
fig|1428.368.peg.1087	2	99	TKYPFEIKEHNK		missed K-Y@2; missed K-E@8	-0.00088253	1532.8	511.94	1532.8	511.94	3	15	14.1.1.1585.18
fig|1428.368.peg.1087	2	99	TLNGYIENK			-0.0016421	1050.53	526.274	1050.53	526.275	2	13	11.1.1.1721.8
fig|1428.368.peg.1087	2	99	TNKPLVVNGK			0.000263477	1068.63	357.217	1068.63	357.217	3	15	12.1.1.1325.2
fig|1428.368.peg.1087	2	99	TNKPLVVNGKEVTAETK	Deamidated(N)@8	missed K-E@10	0.00383263	1828	610.34	1827.99	610.339	3	23	13.1.1.1373.10
fig|1428.368.peg.1087	2	99	TTATDKTDDTKEMHTSK		missed K-T@6; missed K-E@11	0.00144932	1908.88	478.226	1908.87	478.226	4	17	10.1.1.1244.2
fig|1428.368.peg.1087	2	99	VEYKDLIVGK		missed K-D@4	0.00162465	1162.66	388.561	1162.66	388.561	3	10	11.1.1.1836.5
fig|1428.368.peg.1087	2	99	VEYTNLVVGK			-0.00459218	1120.61	561.311	1120.61	561.314	2	14	14.1.1.1785.5
fig|1428.368.peg.1087	2	99	VLLNGFPQK			-0.000449522	1014.59	508.3	1014.59	508.3	2	15	10.1.1.1775.2
fig|1428.368.peg.1087	2	99	VLPNVEFTVFTEDGK			-0.000868312	1693.86	847.935	1693.86	847.935	2	13	11.1.1.2313.21
fig|1428.368.peg.1087	2	99	VLPNVEFTVFTEDGKEVK		missed K-E@15	-0.00400326	2050.06	684.36	2050.06	684.361	3	14	11.1.1.2129.2
fig|1428.368.peg.1087	2	99	VQAIAYR			0.000820866	819.461	410.738	819.46	410.737	2	8	1.1.1.1416.8
fig|1428.368.peg.1087	2	99	VVTKENGIANVEGLTYGK	Deamidated(N)@6	missed K-E@4	0.00576746	1891.99	631.672	1891.99	631.67	3	21	13.1.1.1588.7
fig|1428.368.peg.1087	2	99	VVTTHTDINDK			-0.00190121	1241.62	414.882	1241.63	414.882	3	11	10.1.1.1408.3
fig|1428.368.peg.1087	2	99	VVTTHTDINDKGQTVK		missed K-G@11	-0.00664728	1754.91	585.977	1754.92	585.979	3	18	10.1.1.1433.4
fig|1428.368.peg.1087	2	99	YSMDWSYSNSLGK	Dethiomethyl(M)@3		0.00406989	1488.66	497.226	1488.65	497.225	3	11	10.1.1.1666.6
fig|1428.368.peg.1087	2	99	YTYKETVAPK		missed K-E@4	0.00180329	1198.63	600.32	1198.62	600.319	2	14	10.1.1.1491.3
fig|1428.368.peg.1087	2	99	YYFLETK			-0.000137632	962.475	482.245	962.475	482.245	2	11	13.1.1.1605.4
fig|1428.368.peg.1087	1.79588	98.56	TKYPFEIK		missed K-Y@2	-0.00091497	1024.56	513.287	1024.56	513.287	2	11	12.1.1.1626.3
fig|1428.368.peg.1087	1.69897	99	VIGEYKTDKNGEVNVK	Deamidated(N)@10	missed K-T@6; missed K-N@9	0.00693479	1792.93	449.239	1792.92	449.237	4	10	14.1.1.1568.7
fig|1428.368.peg.1087	1.67778	98.13	VEYKDLQVGK		missed K-D@4	0.00175816	1177.64	589.825	1177.63	589.824	2	8	15.1.1.1617.11
fig|1428.368.peg.1087	1.52288	97.33	YSFVEK			0.00536131	771.386	386.7	771.38	386.697	2	6	8.1.1.1480.6
fig|1428.368.peg.1087	1.18709	94.31	KPLVVDGK			0.00112567	854.524	428.269	854.523	428.269	2	6	13.1.1.1240.4
fig|1428.368.peg.1087	1.05552	92.26	DQLSVGEK			0.000197456	874.44	438.227	874.44	438.227	2	6	14.1.1.1513.4
fig|1428.368.peg.1087	0.954677	90.21	EVTVESKFTAK		missed K-F@7	-0.00191254	1237.65	413.558	1237.66	413.559	3	9	14.1.1.1605.3
fig|1428.368.peg.1087	0.482804	70.08	EVTVESK			-6.44255e-05	790.407	396.211	790.407	396.211	2	5	13.1.1.1182.2
fig|1428.368.peg.1087	0.271646	49.89	EPIVFEIKEHGK		missed K-E@8	-0.00107767	1424.77	475.929	1424.77	475.929	3	9	10.1.1.1702.4
fig|1428.368.peg.1087	0.234331	45.08	FVKPLVK			0.000266898	829.543	415.779	829.543	415.779	2	7	13.1.1.1351.2
fig|1428.368.peg.1087	0.226945	44.04	YPFEIK			-0.001952	795.415	398.715	795.417	398.716	2	7	14.1.1.1820.3
fig|1428.368.peg.1087	0.222573	43.46	FEKLPFGK		missed K-L@3	-0.00639643	964.532	483.273	964.538	483.276	2	7	3.1.1.1737.8
fig|1428.368.peg.1087	0.209012	97.25	FKEVKPEQPKPN		cleaved N-Q@C-term; missed K-E@2	0.0007533	1439.78	480.933	1439.78	480.933	3	8	15.1.1.1475.4
fig|1428.368.peg.1087	0.106238	24.16	NKNVEK		cleaved E-N@N-term; missed K-N@2	0.023039	730.42	366.217	730.397	366.206	2	3	7.1.1.1423.2
fig|1428.368.peg.1087	0.0872467	20.28	SIPTPEQQKAEK		missed K-A@9	0.000670865	1354.71	452.577	1354.71	452.577	3	6	18.1.1.1466.5
fig|1428.368.peg.1087	0.0614803	76.51	EVMTHEK		cleaved A-E@N-term	0.00161543	872.408	437.211	872.406	437.21	2	9	13.1.1.1065.2
fig|1428.368.peg.1087	0.0501223	37.23	KTNKPLVVNGKEVTAETK	Deamidated(N)@9	missed K-T@1; missed K-E@11	0.00327423	1956.09	490.03	1956.09	490.03	4	6	18.1.1.1535.10
fig|1428.368.peg.1087	0.00261362	42.97	TEIIK			-0.000587199	602.363	603.371	602.364	603.371	1	5	10.1.1.1421.7
fig|1428.368.peg.1087	0.00174066	59.67	AVQVVNNK	Deamidated(Q)@3	cleaved G-A@N-term	0.00850793	871.485	436.75	871.476	436.745	2	10	4.1.1.1633.4
fig|11428.3.peg.1958	2	99	ALLEIYER			0.000189347	1005.55	503.782	1005.55	503.782	2	13	2.1.1.1811.4
fig|11428.3.peg.1958	2	99	ALMGANMQR			0.00218962	990.476	496.245	990.474	496.244	2	15	8.1.1.1462.12
fig|11428.3.peg.1958	2	99	DIPNVGEDALR			-0.00429567	1197.59	599.805	1197.6	599.807	2	15	7.1.1.1657.2
fig|11428.3.peg.1958	2	99	DSGAAVICK	Carbamidomethyl(C)@8		0.00208692	919.445	460.73	919.443	460.729	2	7	9.1.1.1314.5
fig|11428.3.peg.1958	2	99	DTSLRVPHGGGGIILDVK		missed R-V@5	-0.00402406	1833.01	612.01	1833.01	612.011	3	27	7.1.1.1704.4
fig|11428.3.peg.1958	2	99	DVHYSHYGR			-0.00332563	1132.5	378.508	1132.51	378.509	3	10	2.1.1.1407.2
fig|11428.3.peg.1958	2	99	DVTYAAPLR			0.00489767	1004.53	503.274	1004.53	503.272	2	11	5.1.1.1717.8
fig|11428.3.peg.1958	2	99	ELQSLGMDVK			0.00909405	1118.57	560.294	1118.56	560.289	2	13	16.1.1.1736.5
fig|11428.3.peg.1958	2	99	ERIDYMDVSPK		missed R-I@2	0.0021881	1351.65	451.556	1351.64	451.555	3	13	6.1.1.1521.6
fig|11428.3.peg.1958	2	99	FRGENIVTNR		missed R-G@2	-0.00218522	1204.63	603.322	1204.63	603.323	2	13	2.1.1.1538.19
fig|11428.3.peg.1958	2	99	FRGENIVTNRER	Deamidated(N)@9	missed R-G@2; missed R-E@10	0.00131792	1490.76	373.697	1490.76	373.697	4	8	7.1.1.1406.2
fig|11428.3.peg.1958	2	99	GENVPEPGVPESFK			-0.000936303	1484.71	743.364	1484.71	743.365	2	16	6.1.1.1596.19
fig|11428.3.peg.1958	2	99	GFTATVIPNR			0.000587964	1074.58	538.299	1074.58	538.298	2	13	16.1.1.1722.6
fig|11428.3.peg.1958	2	99	GVTELTAEER			0.00269165	1103.55	552.782	1103.55	552.78	2	13	1.1.1.1456.16
fig|11428.3.peg.1958	2	99	GVTELTAEERL		cleaved L-L@C-term; missed R-L@10	0.00078382	1216.63	609.323	1216.63	609.322	2	16	1.1.1.1628.7
fig|11428.3.peg.1958	2	99	HPGVVER			0.00369474	792.428	397.221	792.424	397.219	2	7	8.1.1.1227.3
fig|11428.3.peg.1958	2	99	IDYMDVSPK			0.00216423	1066.5	534.259	1066.5	534.258	2	10	5.1.1.1771.11
fig|11428.3.peg.1958	2	99	IILDVK		cleaved G-I@N-term	0.000266926	699.453	350.734	699.453	350.734	2	8	10.1.1.1701.2
fig|11428.3.peg.1958	2	99	ILPEEDMPYLPDGTPIDIMLNPLGVPSR			0.00414217	3091.57	1031.53	3091.56	1031.53	3	17	6.1.1.2699.3
fig|11428.3.peg.1958	2	99	ILPYLEK			-0.0194068	874.497	438.256	874.516	438.265	2	9	14.1.1.1809.2
fig|11428.3.peg.1958	2	99	IYAPESEGER			-0.000708891	1149.53	575.772	1149.53	575.772	2	10	4.1.1.1502.9
fig|11428.3.peg.1958	2	99	KLPVTVLLR		missed K-L@1	0.000896718	1037.7	519.856	1037.7	519.855	2	11	9.1.1.1645.4
fig|11428.3.peg.1958	2	99	LAETLVDPETGEILAAEGTILDRR		missed R-R@23	0.00746735	2581.37	861.463	2581.36	861.461	3	19	1.1.1.2385.5
fig|11428.3.peg.1958	2	99	LAHMVDDKLHAR		missed K-L@8	0.00196568	1404.73	352.19	1404.73	352.19	4	15	1.1.1.1375.2
fig|11428.3.peg.1958	2	99	LGPEEITR			-0.00375732	913.483	457.749	913.487	457.751	2	11	3.1.1.1635.4
fig|11428.3.peg.1958	2	99	LLHAIFGEK			-0.000838691	1026.59	514.3	1026.59	514.3	2	15	16.1.1.1720.2
fig|11428.3.peg.1958	2	99	LNVEVETTKE		missed K-E@9	0.000158304	1160.59	581.304	1160.59	581.304	2	8	8.1.1.1493.14
fig|11428.3.peg.1958	2	99	LRPGEPPTVENAK			0.00109571	1406.75	469.925	1406.75	469.925	3	16	4.1.1.1501.7
fig|11428.3.peg.1958	2	99	LSALGPGGLTR			-0.00143888	1040.6	521.306	1040.6	521.306	2	14	6.1.1.1553.6
fig|11428.3.peg.1958	2	99	LSDEGEFLSEDIVAR			-0.000313201	1678.8	840.41	1678.81	840.41	2	25	7.1.1.2113.5
fig|11428.3.peg.1958	2	99	RLSALGPGGLTR		missed R-L@1	0.00510665	1196.7	399.909	1196.7	399.907	3	12	8.1.1.1532.2
fig|11428.3.peg.1958	2	99	RYDLANVGR		missed R-Y@1	0.00368278	1062.56	355.194	1062.56	355.193	3	9	4.1.1.1575.3
fig|11428.3.peg.1958	2	99	RYVEVDGQTVK		missed R-Y@1	0.00284084	1292.68	431.899	1292.67	431.898	3	13	1.1.1.1420.9
fig|11428.3.peg.1958	2	99	SNQGTCYNQRPIVSVGNEVVK	Carbamidomethyl(C)@6		-0.00381957	2348.15	783.724	2348.15	783.725	3	16	7.1.1.1586.14
fig|11428.3.peg.1958	2	99	SPSVYYSGK			0.00593992	986.477	494.246	986.471	494.243	2	9	17.1.1.1549.10
fig|11428.3.peg.1958	2	99	STGPYSLVTQQPLGGK			0.00368611	1631.86	816.935	1631.85	816.933	2	15	4.1.1.1817.21
fig|11428.3.peg.1958	2	99	SVGELLQNQFR			-0.000714741	1289.67	645.843	1289.67	645.844	2	18	2.1.1.1870.4
fig|11428.3.peg.1958	2	99	TAKPMGGVVEGDVELQSIK			0.000161532	1957.02	979.517	1957.02	979.517	2	17	2.1.1.1784.26
fig|11428.3.peg.1958	2	99	TGQLVQYGR		cleaved M-T@N-term	-0.00302938	1020.53	511.273	1020.54	511.275	2	13	2.1.1.1551.18
fig|11428.3.peg.1958	2	99	TYEAIVKGENVPEPGVPESFK		missed K-G@7	0.00307986	2289.16	764.059	2289.15	764.058	3	13	2.1.1.1833.13
fig|11428.3.peg.1958	2	99	VFNREDGDELPPGVNQLVR		missed R-E@4	0.00185441	2153.09	718.703	2153.09	718.703	3	18	2.1.1.1864.2
fig|11428.3.peg.1958	2	99	VGAEVKDGDLLVGK		missed K-D@6	-0.00224862	1398.77	700.392	1398.77	700.393	2	19	1.1.1.1533.21
fig|11428.3.peg.1958	2	99	VGDTDDIDHLGNR			0.00564767	1425.65	476.225	1425.65	476.223	3	12	4.1.1.1582.10
fig|11428.3.peg.1958	2	99	VGDTDDIDHLGNRR		missed R-R@13	0.00454517	1581.75	528.259	1581.75	528.257	3	17	8.1.1.1432.11
fig|11428.3.peg.1958	2	99	VINVIGNANITR			-0.000783324	1282.74	642.375	1282.74	642.375	2	18	2.1.1.1762.19
fig|11428.3.peg.1958	2	99	VIVSQLVR			-0.0043005	912.571	457.293	912.576	457.295	2	12	4.1.1.1701.7
fig|11428.3.peg.1958	2	99	VKTYEAIVK		missed K-T@2	-0.000348886	1049.61	350.878	1049.61	350.878	3	9	7.1.1.1428.2
fig|11428.3.peg.1958	2	99	VNEFGFIETPYR			0.000949042	1470.72	736.365	1470.71	736.364	2	16	6.1.1.1988.8
fig|11428.3.peg.1958	2	99	VPHGGGGIILDVK			-0.00293083	1260.72	631.365	1260.72	631.367	2	15	7.1.1.1573.12
fig|11428.3.peg.1958	2	99	YDLANVGR			-0.00127902	906.455	454.235	906.456	454.235	2	10	7.1.1.1528.2
fig|11428.3.peg.1958	2	99	YSVDECKER	Carbamidomethyl(C)@6	missed K-E@7	-0.000983181	1184.51	395.845	1184.51	395.845	3	7	4.1.1.1404.2
fig|11428.3.peg.1958	2	99	YSVDECKERDVTYAAPLR	Carbamidomethyl(C)@6	missed K-E@7; missed R-D@9	0.00912396	2171.04	543.768	2171.03	543.765	4	13	7.1.1.1538.11
fig|11428.3.peg.1958	2	99	YVEVDGQTVK			-8.60761e-07	1136.57	569.293	1136.57	569.293	2	15	2.1.1.1584.14
fig|11428.3.peg.1958	2	99	YVEVDGQTVKGDLDR		missed K-G@10	-0.0115627	1692.82	565.281	1692.83	565.285	3	14	1.1.1.1545.10
fig|11428.3.peg.1958	1.95861	99	TYEAIVK			-0.00551577	822.443	412.229	822.449	412.232	2	6	17.1.1.1582.2
fig|11428.3.peg.1958	1.58503	99	RYVEVDGQTVKGDLDR		missed R-Y@1; missed K-G@11	-0.997412	1847.94	616.986	1848.93	617.318	3	11	2.1.1.1627.16
fig|11428.3.peg.1958	1.48149	97.17	LINKETGEVK		missed K-E@4	0.00999181	1129.64	377.555	1129.63	377.552	3	6	8.1.1.1308.2
fig|11428.3.peg.1958	1.31876	95.77	AYIVQKR		missed K-R@6	-0.00148696	876.517	439.266	876.518	439.266	2	6	7.1.1.1291.3
fig|11428.3.peg.1958	0.866461	98.61	SALGPGGLTR		cleaved L-S@N-term	0.00205333	927.516	464.765	927.514	464.764	2	9	8.1.1.1490.6
fig|11428.3.peg.1958	0.543634	74.22	AYIVQK			-0.00256407	720.414	361.214	720.417	361.216	2	4	7.1.1.1348.4
fig|11428.3.peg.1958	0.211125	41.92	DSGAAVICKHPGVVER	Carbamidomethyl(C)@8	missed K-H@9	0.0030575	1693.86	424.472	1693.86	424.472	4	6	7.1.1.1424.6
fig|11428.3.peg.1958	0.136677	29.91	DTEDDDDHQSADKLNVEVETTKE		missed K-L@13; missed K-E@22	0.00600835	2632.13	659.04	2632.13	659.039	4	7	8.1.1.1518.20
fig|11428.3.peg.1958	0.119758	26.78	SDDVVGR			0.0227598	746.379	374.197	746.356	374.185	2	5	1.1.1.1248.2
fig|11428.3.peg.1958	0.090444	21.09	ISEGDKMAGR		missed K-M@6	-0.000174045	1062.51	532.264	1062.51	532.264	2	6	3.1.1.1610.15
fig|11428.3.peg.1958	0.079355	18.76	TILYDGR			-0.00245221	836.437	419.226	836.439	419.227	2	4	5.1.1.1642.8
fig|11428.3.peg.1958	0.00217692	18.14	RAYIVQK		cleaved V-R@N-term; missed R-A@1	0.0254937	876.544	439.279	876.518	439.266	2	8	4.1.1.1574.3
fig|11428.3.peg.1597	2	99	AAAAWEEAKK		missed K-K@9	0.00304874	1073.55	358.858	1073.55	358.857	3	10	1.1.1.1349.2
fig|11428.3.peg.1597	2	99	AGTELMSDAK			-0.00180795	1021.47	511.744	1021.48	511.745	2	9	7.1.1.1408.16
fig|11428.3.peg.1597	2	99	AGTELMSDAKK		missed K-K@10	0.000628151	1149.57	384.197	1149.57	384.197	3	10	3.1.1.1504.4
fig|11428.3.peg.1597	2	99	DGQDTPLK			-0.000398988	872.424	437.219	872.424	437.219	2	12	1.1.1.1293.7
fig|11428.3.peg.1597	2	99	DNKPIPAAAESSTK			0.0011645	1427.73	476.916	1427.73	476.916	3	9	3.1.1.1505.11
fig|11428.3.peg.1597	2	99	DWKHEQGWQLK		missed K-H@3	-0.00357508	1453.71	727.861	1453.71	727.862	2	18	1.1.1.1543.23
fig|11428.3.peg.1597	2	99	DWKHEQGWQLKK		missed K-H@3; missed K-K@11	-0.00394041	1581.8	791.908	1581.81	791.91	2	13	6.1.1.1456.24
fig|11428.3.peg.1597	2	99	EADFLVPK			-0.000454949	917.485	459.75	917.486	459.75	2	12	4.1.1.1734.2
fig|11428.3.peg.1597	2	99	EAIALSVDK			-0.0020025	944.516	473.265	944.518	473.266	2	14	1.1.1.1520.2
fig|11428.3.peg.1597	2	99	EAIALSVDKK		missed K-K@9	-0.00287168	1072.61	358.544	1072.61	358.545	3	13	7.1.1.1447.2
fig|11428.3.peg.1597	2	99	ELGKDQVTIEFLNYDTGNAK		missed K-D@4	0.00438425	2254.12	752.379	2254.11	752.378	3	21	1.1.1.1992.3
fig|11428.3.peg.1597	2	99	ELGKDQVTIEFLNYDTGNAKK		missed K-D@4; missed K-K@20	0.00429832	2382.21	795.078	2382.21	795.076	3	15	4.1.1.1876.16
fig|11428.3.peg.1597	2	99	EPATLINLYDSGQVDFALLTGEFVDKYR		missed K-Y@26	-0.001192	3173.59	1058.87	3173.59	1058.87	3	25	4.1.1.3343.2
fig|11428.3.peg.1597	2	99	FGIESDTTVYNGPFILK	Deamidated(N)@11		0.00356277	1900.95	951.482	1900.95	951.48	2	22	1.1.1.2302.10
fig|11428.3.peg.1597	2	99	GDSYVLQPNVK			-0.000934096	1218.62	610.319	1218.62	610.32	2	18	2.1.1.1656.17
fig|11428.3.peg.1597	2	99	GEKPVTELGVK			-0.0022812	1155.65	386.223	1155.65	386.224	3	14	4.1.1.1516.4
fig|11428.3.peg.1597	2	99	GLATGPDGKDFQETFK		missed K-D@9	0.00220418	1709.83	570.95	1709.83	570.949	3	18	1.1.1.1603.5
fig|11428.3.peg.1597	2	99	GLATGPDGKDFQETFKNGLKPNAK	Deamidated(N)@17	missed K-D@9; missed K-N@16	-0.00257076	2533.28	845.433	2533.28	845.434	3	18	1.1.1.1577.21
fig|11428.3.peg.1597	2	99	GLATGPDGKDFQETFKNGLKPNAKK	Deamidated(N)@17; Deamidated(N)@22	missed K-D@9; missed K-N@16; missed K-K@24	0.00817738	2662.37	666.599	2662.36	666.597	4	23	3.1.1.1732.19
fig|11428.3.peg.1597	2	99	GVTVNIK			0.00152427	729.44	365.727	729.438	365.727	2	9	13.1.1.1373.3
fig|11428.3.peg.1597	2	99	HEQGWQLK			0.00447608	1024.51	513.264	1024.51	513.262	2	11	13.1.1.1363.4
fig|11428.3.peg.1597	2	99	HEQGWQLKK		missed K-K@8	-0.00162847	1152.6	385.208	1152.6	385.209	3	8	3.1.1.1495.4
fig|11428.3.peg.1597	2	99	HNISPEFSFK			-0.00299145	1204.58	603.3	1204.59	603.301	2	16	1.1.1.1577.13
fig|11428.3.peg.1597	2	99	KAAAAWEEAKK		missed K-A@1; missed K-K@10	0.00192443	1201.65	401.556	1201.65	401.556	3	13	1.1.1.1293.5
fig|11428.3.peg.1597	2	99	KAGTELMSDAK		missed K-A@1	0.000704372	1149.57	575.793	1149.57	575.792	2	11	2.1.1.1442.17
fig|11428.3.peg.1597	2	99	KAGTELMSDAKK		missed K-A@1; missed K-K@11	0.00159186	1277.67	426.896	1277.66	426.896	3	15	2.1.1.1395.6
fig|11428.3.peg.1597	2	99	KELGKDQVTIEFLNYDTGNAK		missed K-E@1; missed K-D@5	0.000345889	2382.21	596.559	2382.21	596.559	4	14	4.1.1.1857.9
fig|11428.3.peg.1597	2	99	KNDQYWDKK		missed K-N@1; missed K-K@8	-0.00194786	1223.59	612.803	1223.59	612.804	2	9	1.1.1.1306.10
fig|11428.3.peg.1597	2	99	KVGEYIKDQIEK		missed K-V@1; missed K-D@7	0.00453827	1448.79	363.205	1448.79	363.204	4	15	1.1.1.1471.3
fig|11428.3.peg.1597	2	99	LDKDNKPIPAAAESSTK		missed K-D@3	0.00210512	1783.93	595.652	1783.93	595.651	3	23	1.1.1.1339.17
fig|11428.3.peg.1597	2	99	LDKDNKPIPAAAESSTKSEDGK		missed K-D@3; missed K-S@17	0.00150939	2300.15	767.724	2300.15	767.724	3	14	1.1.1.1331.11
fig|11428.3.peg.1597	2	99	LDKDNKPIPAAAESSTKSEDGKK		missed K-D@3; missed K-S@17; missed K-K@22	0.00418241	2428.25	608.069	2428.24	608.068	4	17	1.1.1.1281.7
fig|11428.3.peg.1597	2	99	LEEVNFSVVK			-0.00286623	1162.62	582.318	1162.62	582.319	2	17	1.1.1.1673.2
fig|11428.3.peg.1597	2	99	LEEVNFSVVKEPATLINLYDSGQVDFALLTGEFVDKYR		missed K-E@10; missed K-Y@36	-0.0089993	4318.19	1080.56	4318.21	1080.56	4	30	4.1.1.3393.3
fig|11428.3.peg.1597	2	99	LREAIALSVDKK		missed R-E@2; missed K-K@11	0.00107094	1341.8	671.907	1341.8	671.906	2	20	1.1.1.1465.12
fig|11428.3.peg.1597	2	99	NAEVVNKGEKPVTELGVK		missed K-G@7	0.010328	1910.06	637.693	1910.05	637.69	3	25	1.1.1.1454.19
fig|11428.3.peg.1597	2	99	NDQYWDKK		missed K-K@7	-0.00197492	1095.5	548.756	1095.5	548.757	2	9	1.1.1.1363.4
fig|11428.3.peg.1597	2	99	NKKDEFGTYSQVSTYFIR		missed K-K@2; missed K-D@3	0.00404433	2182.07	546.526	2182.07	546.525	4	20	4.1.1.1899.3
fig|11428.3.peg.1597	2	99	NLANVILNDGSK			-0.00313034	1256.67	629.342	1256.67	629.344	2	20	1.1.1.1772.2
fig|11428.3.peg.1597	2	99	NLANVILNDGSKEADFLVPK		missed K-E@12	0.00410406	2156.15	719.725	2156.15	719.723	3	19	1.1.1.2368.2
fig|11428.3.peg.1597	2	99	NLKGVTVNIK		missed K-G@3	-0.0022206	1084.66	362.56	1084.66	362.561	3	11	3.1.1.1646.2
fig|11428.3.peg.1597	2	99	RDGQDTPLK		missed R-D@1	-0.0011485	1028.52	515.269	1028.53	515.27	2	12	6.1.1.1238.4
fig|11428.3.peg.1597	2	99	STDTVSSQMLGNTMEGLYR			0.00257953	2088.95	1045.48	2088.95	1045.48	2	25	1.1.1.2078.7
fig|11428.3.peg.1597	2	99	TAAEYAFIAFPIK			0.00165713	1440.77	721.391	1440.77	721.39	2	22	1.1.1.2303.3
fig|11428.3.peg.1597	2	99	TLLEEDVAIVPLYQR			0.00105704	1757.96	879.986	1757.96	879.985	2	21	1.1.1.2239.7
fig|11428.3.peg.1597	2	99	TVKLEEVNFSVVK		missed K-L@3	0.000587769	1490.84	497.952	1490.83	497.952	3	20	2.1.1.1820.4
fig|11428.3.peg.1597	2	99	TVNQEIPTMDSSK			-0.00275253	1448.68	725.347	1448.68	725.348	2	20	1.1.1.1520.4
fig|11428.3.peg.1597	2	99	VGEYIKDQIEK	Deamidated(Q)@8	missed K-D@6	-0.00823702	1321.67	661.841	1321.68	661.846	2	15	1.1.1.1524.13
fig|11428.3.peg.1597	2	99	WAYVTEK			0.00236418	895.446	448.73	895.444	448.729	2	9	4.1.1.1633.6
fig|11428.3.peg.1597	2	99	WEELGKAEK		missed K-A@6	-0.000728472	1088.55	363.857	1088.55	363.857	3	7	4.1.1.1520.2
fig|11428.3.peg.1597	2	99	WSNGDPVTAK	Deamidated(N)@3		0.000558793	1074.5	538.257	1074.5	538.256	2	16	2.1.1.1561.5
fig|11428.3.peg.1597	2	99	WSNGDPVTAKDFVYAWQR	Deamidated(N)@3	missed K-D@10	0.00443915	2140.01	714.342	2140	714.341	3	17	6.1.1.2035.3
fig|11428.3.peg.1597	2	99	YDGMVKK		missed K-K@6	-0.00119579	839.42	420.717	839.421	420.718	2	8	1.1.1.1246.2
fig|11428.3.peg.1597	1.92082	98.95	YDGMVK			-0.000164249	711.326	356.67	711.326	356.67	2	6	1.1.1.1327.2
fig|11428.3.peg.1597	1.82391	98.7	GVVKHNISPEFSFK		missed K-H@4	-0.0181449	1587.82	530.282	1587.84	530.288	3	11	3.1.1.1728.15
fig|11428.3.peg.1597	1.46852	97.72	KRWEELGKAEK		missed K-R@1; missed R-W@2; missed K-A@8	-0.00868156	1372.74	687.376	1372.75	687.38	2	7	6.1.1.1331.18
fig|11428.3.peg.1597	1.35655	96.21	KELGKDQVTIEFLNYDTGNAKK		missed K-E@1; missed K-D@5; missed K-K@21	0.0138428	2510.32	628.586	2510.3	628.583	4	9	4.1.1.1786.13
fig|11428.3.peg.1597	1.3098	95.77	WEELGK			0.00273381	760.378	381.196	760.376	381.195	2	6	1.1.1.1466.2
fig|11428.3.peg.1597	0.958607	99	AEVVNKGEKPVTELGVK		cleaved N-A@N-term; missed K-G@6	-0.0023541	1796	599.675	1796	599.675	3	11	1.1.1.1442.19
fig|11428.3.peg.1597	0.548214	74.58	KRWEELGK		missed K-R@1; missed R-W@2	-0.00993431	1044.56	523.288	1044.57	523.293	2	8	12.1.1.1402.5
fig|11428.3.peg.1597	0.124939	64.45	LKKNDQYWDKK	Deamidated(N)@4	cleaved Q-L@N-term; missed K-K@2; missed K-N@3; missed K-K@10	0.00346889	1465.76	367.447	1465.76	367.446	4	7	14.1.1.1488.3
fig|11428.3.peg.1597	0.00480371	38.29	DFQETFKNGLKPNAK	Deamidated(N)@8; Deamidated(N)@13	missed K-N@7	-0.00795269	1737.85	580.29	1737.86	580.293	3	10	14.1.1.1723.18
fig|11428.3.peg.2783	2	99	AAMEKEFGQLK		missed K-E@5	-0.00471825	1250.63	626.321	1250.63	626.324	2	16	1.1.1.1506.16
fig|11428.3.peg.2783	2	99	AAMEKEFGQLKDQIK		missed K-E@5; missed K-D@11	0.00129473	1734.9	434.732	1734.9	434.732	4	17	1.1.1.1598.3
fig|11428.3.peg.2783	2	99	AFEDYTAAEAGK			0.000426013	1271.57	636.791	1271.57	636.791	2	17	1.1.1.1510.17
fig|11428.3.peg.2783	2	99	AFEDYTAAEAGKEEDAAK		missed K-E@12	-0.00350469	1914.84	958.43	1914.85	958.431	2	21	1.1.1.1493.25
fig|11428.3.peg.2783	2	99	AIDAAYK			-0.000274264	750.391	376.203	750.391	376.203	2	7	7.1.1.1353.4
fig|11428.3.peg.2783	2	99	AIDAAYKK		missed K-K@7	0.00118244	878.487	440.251	878.486	440.25	2	12	1.1.1.1274.8
fig|11428.3.peg.2783	2	99	AMGRLAAPDADATTR		missed R-L@4	0.0102769	1515.76	506.26	1515.75	506.256	3	13	3.1.1.1603.14
fig|11428.3.peg.2783	2	99	ARENGLGVAANNTQDGMSLIR	Deamidated(N)@4	missed R-E@2	0.00266634	2187.07	730.032	2187.07	730.031	3	25	1.1.1.1652.4
fig|11428.3.peg.2783	2	99	AVERAFEDYTAAEAGKEEDAAK		missed R-A@4; missed K-E@16	0.00193248	2370.1	791.04	2370.1	791.04	3	25	1.1.1.1562.13
fig|11428.3.peg.2783	2	99	DAFDKVK		missed K-V@5	0.0011754	821.429	411.722	821.428	411.721	2	11	1.1.1.1343.5
fig|11428.3.peg.2783	2	99	DLANQSANGTNTDENK	Deamidated(N)@8		-0.000499403	1691.72	846.869	1691.72	846.869	2	14	1.1.1.1316.12
fig|11428.3.peg.2783	2	99	DLANQSANGTNTDENKAAMEK	Deamidated(N)@8	missed K-A@16	-0.000500002	2221.98	741.666	2221.98	741.666	3	16	1.1.1.1392.25
fig|11428.3.peg.2783	2	99	DLANQSANGTNTDENKAAMEKEFGQLK		missed K-A@16; missed K-E@21	2.00402	2925.37	732.349	2923.36	731.848	4	15	2.1.1.1787.18
fig|11428.3.peg.2783	2	99	DLANQSANGTNTDENKAAMEKEFGQLKDQIK	Deamidated(N)@8	missed K-A@16; missed K-E@21; missed K-D@27	0.018199	3408.63	682.733	3408.61	682.729	5	16	4.1.1.1894.11
fig|11428.3.peg.2783	2	99	DLDVLTK			-0.00219867	802.441	402.228	802.444	402.229	2	10	7.1.1.1562.3
fig|11428.3.peg.2783	2	99	DLDVQVAK			-0.00163987	886.474	444.244	886.476	444.245	2	13	7.1.1.1477.4
fig|11428.3.peg.2783	2	99	EFGQLKDQIK	Glu->pyro-Glu@N-term	missed K-D@6	0.0231762	1186.66	594.336	1186.63	594.325	2	12	3.1.1.1829.6
fig|11428.3.peg.2783	2	99	ENGLGVAANNTQDGMSLIR			2.99198	1961.94	981.977	1958.95	980.481	2	14	10.1.1.2020.24
fig|11428.3.peg.2783	2	99	GFIADPAQAK			-0.00158694	1016.53	509.271	1016.53	509.272	2	15	2.1.1.1635.9
fig|11428.3.peg.2783	2	99	GFIADPAQAKAVER		missed K-A@10	-0.00020018	1471.78	491.6	1471.78	491.6	3	12	7.1.1.1532.8
fig|11428.3.peg.2783	2	99	IAGSSLAALGLDK			-0.00189595	1214.69	608.35	1214.69	608.351	2	23	1.1.1.1781.4
fig|11428.3.peg.2783	2	99	IAGSSLAALGLDKVQIGQETVAQK		missed K-V@13	0.00353023	2396.33	799.784	2396.33	799.783	3	30	1.1.1.2018.4
fig|11428.3.peg.2783	2	99	IAGSSLAALGLDKVQIGQETVAQKDLDVLTK		missed K-V@13; missed K-D@24	0.00907084	3180.77	796.2	3180.76	796.197	4	29	1.1.1.2256.2
fig|11428.3.peg.2783	2	99	IDAAYKK		cleaved A-I@N-term; missed K-K@6	0.000210035	807.449	404.732	807.449	404.732	2	6	3.1.1.1437.2
fig|11428.3.peg.2783	2	99	INNASDDAAGLAIATRMRARENGLGVAANNT	Oxidation(M)@17; Deamidated(N)@30	cleaved T-Q@C-term; missed R-M@16; missed R-A@18; missed R-E@20	0.048512	3143.59	1048.87	3143.54	1048.85	3	11	2.1.1.1725.26
fig|11428.3.peg.2783	2	99	KAAMEKEFGQLKDQIK		cleaved N-K@N-term; missed K-A@1; missed K-E@6; missed K-D@12	0.00780493	1863	466.757	1862.99	466.755	4	16	3.1.1.1714.2
fig|11428.3.peg.2783	2	99	KVTGLTAGTTGTVDAHN		cleaved N-A@C-term; missed K-V@1	-0.00156371	1641.83	548.284	1641.83	548.285	3	11	3.1.1.1579.14
fig|11428.3.peg.2783	2	99	KVTGLTAGTTGTVDAHNAVNK		missed K-V@1	0.00740672	2054.08	514.528	2054.08	514.526	4	17	1.1.1.1422.4
fig|11428.3.peg.2783	2	99	KVTGLTAGTTGTVDAHNAVNKIDAALK		missed K-V@1; missed K-I@21	0.00717693	2665.45	889.49	2665.44	889.487	3	27	2.1.1.1816.10
fig|11428.3.peg.2783	2	99	LAAPDADATTR			-0.00143488	1100.54	551.28	1100.55	551.28	2	11	2.1.1.1421.6
fig|11428.3.peg.2783	2	99	LAAPDADATTRDLDVQVAK		missed R-D@11	-2.89284e-05	1969.01	657.345	1969.01	657.344	3	16	1.1.1.1583.17
fig|11428.3.peg.2783	2	99	MRDLANQSANGTNTDENK	Deamidated(N)@10	missed R-D@2	-0.000158249	1978.86	660.629	1978.86	660.629	3	20	1.1.1.1342.14
fig|11428.3.peg.2783	2	99	MRDLANQSANGTNTDENKAAMEK	Oxidation(M)@1; Dehydrated(D)@3; Deamidated(N)@10	missed R-D@2; missed K-A@18	0.00945865	2507.11	627.785	2507.1	627.783	4	25	1.1.1.1352.17
fig|11428.3.peg.2783	2	99	MRDLANQSANGTNTDENKAAMEKEFGQLK	Deamidated(N)@10	missed R-D@2; missed K-A@18; missed K-E@23	0.00274456	3211.49	803.88	3211.49	803.879	4	23	2.1.1.1750.20
fig|11428.3.peg.2783	2	99	MRDLANQSANGTNTDENKAAMEKEFGQLKDQIK	Deamidated(N)@10; Oxidation(M)@21	missed R-D@2; missed K-A@18; missed K-E@23; missed K-D@29	0.00191552	3711.75	743.357	3711.75	743.357	5	20	1.1.1.1573.22
fig|11428.3.peg.2783	2	99	NLLDAASGTTK			-0.00341051	1089.56	545.789	1089.57	545.791	2	15	1.1.1.1522.7
fig|11428.3.peg.2783	2	99	RAFEDYTAAEAGKEEDAAK	Carbamidomethyl@N-term	cleaved E-R@N-term; missed R-A@1; missed K-E@13	-0.0386821	2127.93	710.318	2127.97	710.331	3	20	3.1.1.1692.13
fig|11428.3.peg.2783	2	99	SDQASTQIEIK		cleaved D-S@N-term	0.00185091	1218.61	610.313	1218.61	610.312	2	11	3.1.1.1611.9
fig|11428.3.peg.2783	2	99	SIAIQTLDSDQASTQIEIK			0.00331426	2060.07	1031.04	2060.06	1031.04	2	23	1.1.1.4316.2
fig|11428.3.peg.2783	2	99	TADSALQSVAN		cleaved N-I@C-term	-0.000330897	1075.51	538.764	1075.51	538.765	2	15	2.1.1.1621.16
fig|11428.3.peg.2783	2	99	TADSALQSVANILLR			-0.00151194	1570.87	786.44	1570.87	786.441	2	25	1.1.1.2503.3
fig|11428.3.peg.2783	2	99	TLDSDQASTQIEIK		cleaved Q-T@N-term	0.00262386	1547.77	774.893	1547.77	774.891	2	18	1.1.1.1544.23
fig|11428.3.peg.2783	2	99	TQFNDKNLLDAASGTTK		cleaved N-T@N-term; missed K-N@6	-0.000385692	1822.91	912.46	1822.91	912.46	2	15	2.1.1.1754.20
fig|11428.3.peg.2783	2	99	TVADNRATLGATLNR		missed R-A@6	4.03611e-05	1571.84	524.953	1571.84	524.953	3	22	1.1.1.1504.13
fig|11428.3.peg.2783	2	99	VQIGQETVAQK			0.00215595	1199.65	600.834	1199.65	600.833	2	18	1.1.1.1426.17
fig|11428.3.peg.2783	2	99	VQIGQETVAQKDLDVLTK		missed K-D@11	0.00317431	1984.09	662.37	1984.08	662.369	3	26	1.1.1.1767.2
fig|11428.3.peg.2783	2	99	VTGLTAGTTGTVDAH		cleaved H-N@C-term	-0.00111523	1399.69	700.854	1399.69	700.854	2	16	3.1.1.1641.15
fig|11428.3.peg.2783	2	99	VTGLTAGTTGTVDAHN		cleaved N-A@C-term	-0.00216997	1513.74	757.875	1513.74	757.876	2	16	3.1.1.1641.18
fig|11428.3.peg.2783	2	99	VTGLTAGTTGTVDAHNAVNK			-0.0062218	1925.97	642.999	1925.98	643.001	3	17	1.1.1.1561.13
fig|11428.3.peg.2783	2	99	VTGLTAGTTGTVDAHNAVNKID		cleaved D-A@C-term; missed K-I@20	-0.00973475	2154.08	719.035	2154.09	719.038	3	16	3.1.1.1747.16
fig|11428.3.peg.2783	2	99	VTGLTAGTTGTVDAHNAVNKIDAALK		missed K-I@20	0.00865917	2537.35	635.346	2537.34	635.344	4	19	1.1.1.1810.2
fig|11428.3.peg.2783	2	99	YITDNTQFNDK			-0.00909065	1357.61	679.81	1357.61	679.815	2	12	11.1.1.1737.11
fig|11428.3.peg.2783	2	99	YITDNTQFNDKNLLDAASGTTK		missed K-N@11	0.00125878	2429.17	810.731	2429.17	810.731	3	28	1.1.1.1785.4
fig|11428.3.peg.2783	1.25964	95.23	IDAALKTVADNR		missed K-T@6	-0.00203239	1285.7	429.573	1285.7	429.574	3	6	7.1.1.1438.7
fig|11428.3.peg.2783	1.04096	99	ARENGLGVAANNTQD	Deamidated(N)@4	cleaved D-G@C-term; missed R-E@2	-0.00230026	1529.7	765.86	1529.71	765.861	2	9	2.1.1.1516.23
fig|11428.3.peg.2783	0.995679	99	LTAGTTGTVDAHNAVNK		cleaved G-L@N-term	-0.00726193	1668.84	557.286	1668.84	557.288	3	10	5.1.1.1552.12
fig|11428.3.peg.2783	0.0979971	84.12	GQLKDQIK		cleaved F-G@N-term; missed K-D@4	-0.000777449	928.533	465.274	928.534	465.274	2	7	4.1.1.1621.6
fig|11428.3.peg.2783	0.0888424	20.94	VKGFIADPAQAK		missed K-G@2	-0.00534009	1243.69	415.57	1243.69	415.571	3	5	5.1.1.1646.4
fig|11428.3.peg.2783	0.000434512	96.46	ADPAQAK		cleaved I-A@N-term	-0.0110574	699.344	700.351	699.355	700.362	1	8	6.1.1.1495.11
fig|11428.3.peg.70	2	99	DGALIAAAYVSITDLADYN		cleaved N-P@C-term	-0.000119111	1954.95	978.483	1954.95	978.483	2	19	8.1.1.5288.2
fig|11428.3.peg.70	2	99	DGALIAAAYVSITDLADYNPNLGLTNEGN		cleaved N-G@C-term	0.00107461	2964.44	742.116	2964.44	742.116	4	13	11.1.1.3628.2
fig|11428.3.peg.70	2	99	DGALIAAAYVSITDLADYNPNLGLTNEGNGVAHFK	Deamidated(N)@29		0.0138015	3604.78	902.203	3604.77	902.199	4	33	1.1.1.4106.2
fig|11428.3.peg.70	2	99	DGALIAAAYVSITDLADYNPNLGLTNEGNGVAHFKGEGYIEGAQGLR	Deamidated(N)@29	missed K-G@35	0.0233033	4835.39	1209.86	4835.37	1209.85	4	28	7.1.1.4549.2
fig|11428.3.peg.70	2	99	ESVTPQYDVIPTEPVNNHITTK		cleaved N-E@N-term	0.00518555	2481.24	828.089	2481.24	828.087	3	14	2.1.1.1797.20
fig|11428.3.peg.70	2	99	FKGEGYIEGAQGLR		cleaved H-F@N-term; missed K-G@2	-0.000195962	1523.77	508.932	1523.77	508.932	3	17	1.1.1.1575.9
fig|11428.3.peg.70	2	99	GEGYIEGAQGLR			-0.00303921	1248.61	625.311	1248.61	625.312	2	14	1.1.1.1553.11
fig|11428.3.peg.70	2	99	GIINIQDEINDYMK	Ammonia-loss(N)@10	cleaved M-G@N-term	0.00519482	1647.79	824.901	1647.78	824.898	2	19	1.1.1.2218.6
fig|11428.3.peg.70	2	99	GIINIQDEINDYMKGMYGATSVK	Deamidated(N)@10	cleaved M-G@N-term; missed K-G@14	0.00670283	2560.23	854.416	2560.22	854.414	3	18	1.1.1.2159.3
fig|11428.3.peg.70	2	99	GMYGATSVK			-0.00205102	912.435	457.225	912.438	457.226	2	8	7.1.1.1413.8
fig|11428.3.peg.70	2	99	GMYGATSVKSTYDSSFK		missed K-S@9	-0.00180963	1827.83	914.924	1827.83	914.925	2	24	1.1.1.1528.25
fig|11428.3.peg.70	2	99	GVAHFKGEGYIEGAQGLR		cleaved N-G@N-term; missed K-G@6	0.00937117	1887.97	472.999	1887.96	472.997	4	12	2.1.1.1702.3
fig|11428.3.peg.70	2	99	GYKVGGSVSSK		missed K-V@3	0.00347547	1067.56	356.862	1067.56	356.861	3	6	7.1.1.1296.2
fig|11428.3.peg.70	2	99	GYRDGALIAAAY		cleaved Y-V@C-term; missed R-D@3	-0.00234593	1239.62	620.818	1239.62	620.82	2	13	3.1.1.1841.9
fig|11428.3.peg.70	2	99	GYRDGALIAAAYVSITDLADYNPNLGLTNEGNGVAHFK	Deamidated(N)@32	missed R-D@3	0.00673949	3980.96	996.248	3980.95	996.246	4	27	4.1.1.2975.2
fig|11428.3.peg.70	2	99	IEGAQGLR		cleaved Y-I@N-term	0.00150294	842.462	422.238	842.461	422.238	2	13	8.1.1.1376.2
fig|11428.3.peg.70	2	99	IINIQDEINDYMK		cleaved G-I@N-term	0.000402522	1607.79	804.901	1607.79	804.901	2	19	3.1.1.2489.5
fig|11428.3.peg.70	2	99	IQDEINDYMK		cleaved N-I@N-term	0.00232189	1267.58	634.796	1267.58	634.795	2	15	9.1.1.1586.14
fig|11428.3.peg.70	2	99	LGLTNEGNGVAHFK	Deamidated(N)@8	cleaved N-L@N-term	-0.000965098	1456.73	486.584	1456.73	486.584	3	16	2.1.1.1710.8
fig|11428.3.peg.70	2	99	MGIINIQDEINDYMK			0.000966181	1795.85	898.932	1795.85	898.932	2	22	1.1.1.2426.3
fig|11428.3.peg.70	2	99	PASNTYLIQGSLAPNVTLINDR		cleaved R-P@N-term	-0.0014324	2356.24	786.42	2356.24	786.42	3	19	6.1.1.2058.9
fig|11428.3.peg.70	2	99	PASNTYLIQGSLAPNVTLINDRK		cleaved R-P@N-term; missed R-K@22	0.00570482	2484.34	829.12	2484.33	829.118	3	26	7.1.1.2128.2
fig|11428.3.peg.70	2	99	PNLGLTNEGNGVAHFK	Deamidated(N)@10	cleaved N-P@N-term	-0.0222895	1667.8	834.909	1667.83	834.921	2	21	8.1.1.1641.13
fig|11428.3.peg.70	2	99	RPASNTYLIQGSLAPNVTLINDR			0.00133757	2512.34	838.454	2512.34	838.454	3	25	4.1.1.1960.9
fig|11428.3.peg.70	2	99	RPASNTYLIQGSLAPNVTLINDRK		missed R-K@23	0.00224366	2640.44	881.153	2640.43	881.152	3	22	2.1.1.1864.4
fig|11428.3.peg.70	2	99	RPASNTYLIQGSLAPNVTLINDRKE		cleaved E-G@C-term; missed R-K@23; missed K-E@24	0.015369	2769.49	693.38	2769.48	693.377	4	19	4.1.1.1877.10
fig|11428.3.peg.70	2	99	STYDSSFK			-0.00127127	933.407	467.711	933.408	467.711	2	12	7.1.1.1395.4
fig|11428.3.peg.70	2	99	STYDSSFKVFNESVTPQYDVIPTEPVNNHITTK		missed K-V@8	0.00325082	3756.82	940.212	3756.82	940.211	4	17	7.1.1.2189.2
fig|11428.3.peg.70	2	99	SVKSTYDSSFK		cleaved T-S@N-term; missed K-S@3	0.00607997	1247.61	416.877	1247.6	416.875	3	13	8.1.1.1380.8
fig|11428.3.peg.70	2	99	SVTPQYDVIPTEPVNNHITTK		cleaved E-S@N-term	0.00735378	2352.2	785.075	2352.2	785.073	3	11	2.1.1.1783.18
fig|11428.3.peg.70	2	99	SYIQVTEYPMDDNGR			3.56975e-05	1786.78	894.399	1786.78	894.399	2	17	2.1.1.1813.25
fig|11428.3.peg.70	2	99	SYIQVTEYPMDDNGRR	Deamidated(N)@13	cleaved R-P@C-term; missed R-R@15	-0.00185797	1943.87	648.963	1943.87	648.963	3	16	2.1.1.1772.21
fig|11428.3.peg.70	2	99	SYIQVTEYPMDDNGRRPA	Deamidated(N)@13	cleaved A-S@C-term; missed R-R@15	0.00359234	2111.96	704.995	2111.96	704.993	3	12	2.1.1.1781.10
fig|11428.3.peg.70	2	99	SYIQVTEYPMDDNGRRPASN	Deamidated(N)@13	cleaved N-T@C-term; missed R-R@15	-0.00454993	2313.03	772.017	2313.03	772.018	3	14	2.1.1.1764.20
fig|11428.3.peg.70	2	99	SYIQVTEYPMDDNGRRPASNTYLIQGSLAPNVTLINDR	Deamidated(N)@20	missed R-R@15	0.020051	4282.11	1071.54	4282.1	1071.53	4	27	2.1.1.2362.3
fig|11428.3.peg.70	2	99	SYIQVTEYPMDDNGRRPASNTYLIQGSLAPNVTLINDRK	Deamidated(N)@20	missed R-R@15; missed R-K@38	0.0203669	4410.21	883.05	4410.19	883.046	5	18	2.1.1.2166.2
fig|11428.3.peg.70	2	99	TDTRTWTDTTTVK		missed R-T@4	0.000156285	1524.74	763.378	1524.74	763.378	2	17	1.1.1.1429.25
fig|11428.3.peg.70	2	99	TDTRTWTDTTTVKAPPR		missed R-T@4; missed K-A@13	-0.00153993	1945.98	487.503	1945.99	487.504	4	21	7.1.1.1455.11
fig|11428.3.peg.70	2	99	TNVEVAYIIQTGNYNVPVNVESDMTGTLFCR	Carbamidomethyl(C)@30		0.0170272	3503.69	1168.9	3503.67	1168.9	3	22	7.1.1.4653.2
fig|11428.3.peg.70	2	99	TWTDTTTVK	Dioxidation(W)@2		-0.000390271	1083.51	542.761	1083.51	542.761	2	14	3.1.1.1565.4
fig|11428.3.peg.70	2	99	TWTDTTTVKAPPR		missed K-A@9	0.00112815	1472.76	491.928	1472.76	491.928	3	16	1.1.1.1465.3
fig|11428.3.peg.70	2	99	TWTETDTVTSAVTK		cleaved F-T@N-term	-0.00539902	1538.74	770.378	1538.75	770.38	2	21	8.1.1.1620.13
fig|11428.3.peg.70	2	99	VFNESVTPQYDVIPTEPVNNHITTK			0.000911806	2841.42	948.147	2841.42	948.147	3	21	1.1.1.1856.3
fig|11428.3.peg.70	2	99	VGGSVSSK			0.000666621	719.382	360.698	719.381	360.698	2	9	1.1.1.1073.2
fig|11428.3.peg.70	2	99	VGGSVSSKATF	Delta:H(4)C(2)(K)@8	cleaved F-K@C-term; missed K-A@8	-0.000882899	1066.57	534.29	1066.57	534.29	2	17	8.1.1.1476.17
fig|11428.3.peg.70	2	99	VIDNPGTSEVTSTVTFTWTETDTVTSAVTK			0.00113535	3186.55	1063.19	3186.55	1063.19	3	20	1.1.1.4110.2
fig|11428.3.peg.70	1.95861	99	GYIEGAQGLR		cleaved E-G@N-term	-0.00660921	1062.54	532.277	1062.55	532.28	2	10	2.1.1.1633.6
fig|11428.3.peg.70	1.61979	97.93	VGGSVSSKATFK		missed K-A@8	-0.000633248	1166.63	389.884	1166.63	389.884	3	8	7.1.1.1337.3
fig|11428.3.peg.70	1.52288	99	GSLAPNVTLINDR		cleaved Q-G@N-term	0.00316464	1368.74	685.377	1368.74	685.375	2	13	4.1.1.1810.6
fig|11428.3.peg.70	1.50864	99	TSVKSTYDSSFK		cleaved A-T@N-term; missed K-S@4	0.00199867	1348.65	675.334	1348.65	675.333	2	12	8.1.1.1405.5
fig|11428.3.peg.70	1.07058	99	VSAEYNYSTTETTTK		cleaved T-V@N-term	-0.00654568	1693.76	847.888	1693.77	847.891	2	13	7.1.1.1455.26
fig|11428.3.peg.70	0.978811	99	EGYIEGAQGLR		cleaved G-E@N-term	-0.00363939	1191.58	596.8	1191.59	596.801	2	14	8.1.1.1549.11
fig|11428.3.peg.70	0.966576	99	GSLAPNVTLINDRK		cleaved Q-G@N-term; missed R-K@13	-0.00683355	1496.82	749.419	1496.83	749.423	2	14	7.1.1.1593.11
fig|11428.3.peg.70	0.769551	99	SLAPNVTLINDRK		cleaved G-S@N-term; missed R-K@12	-0.000519986	1439.81	480.944	1439.81	480.944	3	14	7.1.1.1589.7
fig|11428.3.peg.70	0.739929	99	YSTTETTTK		cleaved N-Y@N-term	0.00264865	1030.48	516.25	1030.48	516.248	2	8	8.1.1.1251.9
fig|11428.3.peg.70	0.413413	98.99	VIPTEPVNNHITTK		cleaved D-V@N-term	-0.00134419	1561.85	521.622	1561.85	521.623	3	13	7.1.1.1462.8
fig|11428.3.peg.70	0.20412	98.23	GLTNEGNGVAHFK	Deamidated(N)@7	cleaved L-G@N-term	0.00730027	1343.65	448.892	1343.65	448.89	3	12	8.1.1.1499.5
fig|11428.3.peg.70	0.185087	92.95	NHITTK		cleaved N-N@N-term	0.00570071	712.392	357.204	712.387	357.201	2	8	8.1.1.969.2
fig|11428.3.peg.70	0.0639892	97.97	TDTTTVK		cleaved W-T@N-term	5.19319e-05	764.392	383.203	764.392	383.203	2	9	7.1.1.1085.2
fig|11428.3.peg.70	0.0560111	84.92	KGEGYIEGAQGLR		cleaved F-K@N-term; missed K-G@1	-0.00585767	1376.7	689.357	1376.7	689.36	2	8	7.1.1.1477.25
fig|11428.3.peg.70	0.0181814	93.99	WTETDTVTSAVTK		cleaved T-W@N-term	-0.00396285	1437.69	719.855	1437.7	719.857	2	12	7.1.1.1575.18
fig|11428.3.peg.70	0.00524306	41.2	YIEGAQGLR		cleaved G-Y@N-term	0.000507604	1005.52	503.77	1005.52	503.769	2	7	2.1.1.1571.9
fig|11428.3.peg.70	0.00392635	91.15	TDTTTVKAPPR		cleaved W-T@N-term; missed K-A@7	-0.0171675	1185.62	593.816	1185.64	593.825	2	10	7.1.1.1464.17
fig|11428.3.peg.70	0.00305075	99	MGIINIQDEINDYMKGMYGATSVKSTYDSSFK	Deamidated(N)@5; Deamidated(N)@11; Oxidation(M)@14; Dioxidation(M)@17	missed K-G@15; missed K-S@24	0.0349958	3655.66	1219.56	3655.63	1219.55	3	15	7.1.1.1556.26
fig|11428.3.peg.70	0.00174066	19.87	GEGYIEGAQGLRS		cleaved S-Y@C-term; missed R-S@12	-0.00700348	1335.63	668.825	1335.64	668.828	2	10	8.1.1.1548.14
fig|11428.3.peg.4831	2	99	ADADLSYELQQAK			-0.000991302	1450.69	726.354	1450.69	726.354	2	21	1.1.1.1605.24
fig|11428.3.peg.4831	2	99	ADADQYKIEAEAR		missed K-I@7	-0.00222004	1478.7	493.907	1478.7	493.907	3	19	7.1.1.1453.8
fig|11428.3.peg.4831	2	99	ADADRYAVEQSAEAEK		missed R-Y@5	0.00224783	1751.8	584.94	1751.8	584.939	3	18	1.1.1.1426.15
fig|11428.3.peg.4831	2	99	ADADRYAVEQSAEAEKVK		missed R-Y@5; missed K-V@16	0.00373166	1978.96	495.748	1978.96	495.747	4	15	1.1.1.1451.11
fig|11428.3.peg.4831	2	99	AEEVRVEGLAK		missed R-V@5	-0.00348788	1199.65	600.831	1199.65	600.833	2	18	7.1.1.1451.10
fig|11428.3.peg.4831	2	99	AEPLSLLNYK			0.00180219	1146.63	574.322	1146.63	574.322	2	17	5.1.1.1986.3
fig|11428.3.peg.4831	2	99	AILSSMTVEDAYSNR			-0.000476809	1655.78	828.898	1655.78	828.898	2	19	4.1.1.1858.15
fig|11428.3.peg.4831	2	99	AILSSMTVEDAYSNREQFAQK		missed R-E@15	0.00628879	2387.15	796.724	2387.14	796.721	3	18	5.1.1.1928.9
fig|11428.3.peg.4831	2	99	AQGTAEADVIR			-0.000338319	1129.57	565.793	1129.57	565.794	2	8	4.1.1.1523.20
fig|11428.3.peg.4831	2	99	AQQGVTEEQMR			-0.00115662	1275.59	638.801	1275.59	638.801	2	13	1.1.1.1347.7
fig|11428.3.peg.4831	2	99	ARAEEVRVEGLAK		missed R-A@2; missed R-V@7	-0.00079815	1426.79	357.704	1426.79	357.705	4	14	4.1.1.1521.2
fig|11428.3.peg.4831	2	99	ASSGIDLKELLEGFAGK		missed K-E@8	5.36516e-05	1733.92	578.981	1733.92	578.981	3	27	6.1.1.2244.2
fig|11428.3.peg.4831	2	99	DAQIAEAEKHK		missed K-H@9	-0.000922901	1238.62	413.882	1238.63	413.882	3	9	4.1.1.1364.3
fig|11428.3.peg.4831	2	99	DAQIAEAEKHKELK		missed K-H@9; missed K-E@11	0.00193336	1608.85	537.29	1608.85	537.29	3	15	6.1.1.1332.10
fig|11428.3.peg.4831	2	99	DATIANAER			-0.00184228	959.465	480.74	959.467	480.741	2	9	6.1.1.1314.10
fig|11428.3.peg.4831	2	99	DATIANAEREK		missed R-E@9	-0.00270764	1216.6	406.541	1216.6	406.542	3	9	4.1.1.1435.5
fig|11428.3.peg.4831	2	99	EIASPLSNIDK			0.000126173	1185.62	593.819	1185.62	593.819	2	14	4.1.1.1766.11
fig|11428.3.peg.4831	2	99	EIASPLSNIDKITVVDTGGGGK		missed K-I@11	0.00149961	2170.15	724.39	2170.15	724.39	3	22	4.1.1.1959.5
fig|11428.3.peg.4831	2	99	EIASPLSNIDKITVVDTGGGGKNSGAGK	Deamidated(N)@23	missed K-I@11; missed K-N@22	0.0111828	2685.39	672.356	2685.38	672.353	4	14	4.1.1.1904.6
fig|11428.3.peg.4831	2	99	EIMDKNGYLDALGQPQIATVK	Deamidated(N)@6	missed K-N@5	0.00230354	2304.17	769.064	2304.17	769.063	3	24	4.1.1.1932.9
fig|11428.3.peg.4831	2	99	EKQIELEEKEIAR		missed K-Q@2; missed K-E@9	0.00029781	1613.86	807.939	1613.86	807.938	2	16	1.1.1.1466.25
fig|11428.3.peg.4831	2	99	EKQYDAEVK		missed K-Q@2	0.00231646	1108.54	555.278	1108.54	555.277	2	7	6.1.1.1261.6
fig|11428.3.peg.4831	2	99	EKQYDAEVKK		missed K-Q@2; missed K-K@9	-0.00297814	1236.63	413.218	1236.64	413.219	3	11	6.1.1.1215.2
fig|11428.3.peg.4831	2	99	ELLEGFAGK			-0.000981844	962.506	482.26	962.507	482.261	2	12	5.1.1.1842.7
fig|11428.3.peg.4831	2	99	ETEELKVEAK		missed K-V@6	-0.000417868	1174.61	588.311	1174.61	588.311	2	11	4.1.1.1454.12
fig|11428.3.peg.4831	2	99	EVLEGHLR			-0.00125992	951.512	476.764	951.514	476.764	2	10	9.1.1.1367.12
fig|11428.3.peg.4831	2	99	GAVQQLSSDKPV		cleaved V-V@C-term	-0.00464519	1227.64	614.828	1227.65	614.83	2	11	6.1.1.1472.15
fig|11428.3.peg.4831	2	99	GAVQQLSSDKPVVSVVEDEKK		missed K-K@20	0.00338105	2241.19	561.304	2241.19	561.304	4	19	4.1.1.1707.5
fig|11428.3.peg.4831	2	99	GAVQQLSSDKPVVSVVEDEKKEVEKEKE		missed K-K@20; missed K-E@21; missed K-E@25; missed K-E@27	0.00766552	3112.62	779.163	3112.61	779.161	4	21	2.1.1.1766.19
fig|11428.3.peg.4831	2	99	GGGTFVVPIMQR			-0.00363668	1260.66	631.338	1260.66	631.34	2	18	5.1.1.1974.2
fig|11428.3.peg.4831	2	99	ITVVDTGGGGKNSGAGK	Deamidated(N)@12	missed K-N@11	-0.000329869	1517.77	506.93	1517.77	506.93	3	16	4.1.1.1452.6
fig|11428.3.peg.4831	2	99	IVSFTIK			0.00200443	806.492	404.253	806.49	404.252	2	9	7.1.1.1637.2
fig|11428.3.peg.4831	2	99	KADADQYKIEAEAR		missed K-A@1; missed K-I@8	0.00196409	1606.8	402.707	1606.8	402.706	4	18	1.1.1.1402.7
fig|11428.3.peg.4831	2	99	KADADRYAVEQSAEAEK		missed K-A@1; missed R-Y@6	0.00405744	1879.9	470.981	1879.89	470.98	4	16	4.1.1.1494.5
fig|11428.3.peg.4831	2	99	KADADRYAVEQSAEAEKVK		missed K-A@1; missed R-Y@6; missed K-V@17	-0.00162664	2107.05	703.358	2107.05	703.359	3	15	7.1.1.1417.23
fig|11428.3.peg.4831	2	99	KKADADRYAVEQSAEAEK		missed K-K@1; missed K-A@2; missed R-Y@7	-0.00128968	2007.98	503.003	2007.99	503.004	4	11	4.1.1.1454.9
fig|11428.3.peg.4831	2	99	KKADADRYAVEQSAEAEKVK		missed K-K@1; missed K-A@2; missed R-Y@7; missed K-V@18	0.00455518	2235.15	559.796	2235.15	559.795	4	14	6.1.1.1368.12
fig|11428.3.peg.4831	2	99	LEVGTRDTYTK		missed R-D@6	0.00284511	1281.66	428.227	1281.66	428.226	3	9	6.1.1.1382.7
fig|11428.3.peg.4831	2	99	LKGLAEAEAK		missed K-G@2	-0.00226131	1028.58	515.299	1028.59	515.301	2	10	2.1.1.1464.14
fig|11428.3.peg.4831	2	99	NVVTTDDGKK		missed K-K@9	-0.00040973	1075.55	538.783	1075.55	538.783	2	10	6.1.1.1174.3
fig|11428.3.peg.4831	2	99	QGVPVTVNGVSIIK	Deamidated(N)@8		-0.00109933	1410.81	706.411	1410.81	706.411	2	20	2.1.1.1867.4
fig|11428.3.peg.4831	2	99	QIELEEKEIAR	Gln->pyro-Glu@N-term	missed K-E@7	0.000475599	1339.7	670.857	1339.7	670.856	2	15	4.1.1.1787.16
fig|11428.3.peg.4831	2	99	TVGPDEALIVTGNWLGGGK			-0.0062423	1882.97	942.494	1882.98	942.497	2	23	6.1.1.2184.9
fig|11428.3.peg.4831	2	99	VAGYATDLMATMQETLK			-0.0074749	1841.88	614.968	1841.89	614.971	3	19	6.1.1.2206.3
fig|11428.3.peg.4831	2	99	VGSTIEEVSTAAEQYLGKETEELKVEAK		missed K-E@18; missed K-V@24	7.17992e-05	3037.53	760.391	3037.53	760.391	4	20	6.1.1.2228.3
fig|11428.3.peg.4831	2	99	VHEVASTDLK			0.00123215	1097.57	549.794	1097.57	549.793	2	7	4.1.1.1429.11
fig|11428.3.peg.4831	2	99	VHEVASTDLKK		missed K-K@10	0.00214991	1225.67	409.563	1225.67	409.563	3	17	1.1.1.1277.3
fig|11428.3.peg.4831	2	99	YAVEQSAEAEK			0.0013483	1223.57	612.791	1223.57	612.791	2	11	1.1.1.1371.22
fig|11428.3.peg.4831	2	99	YAVEQSAEAEKVK		missed K-V@11	-0.00193692	1450.73	484.583	1450.73	484.584	3	14	4.1.1.1506.14
fig|11428.3.peg.4831	1.85387	98.82	ITVVDTGGGGK			-0.00235503	1002.53	502.273	1002.53	502.275	2	8	4.1.1.1492.8
fig|11428.3.peg.4831	1.63827	98.12	MLPSYAK			-0.00289942	808.412	405.214	808.415	405.215	2	6	7.1.1.1442.6
fig|11428.3.peg.4831	1.0655	92.72	EKQIELEEKEIARR		missed K-Q@2; missed K-E@9; missed R-R@13	0.000428173	1769.96	443.498	1769.96	443.498	4	8	7.1.1.1445.9
fig|11428.3.peg.4831	0.835647	87.6	QIELEEKEIARR		missed K-E@7; missed R-R@11	0.00265861	1512.83	505.284	1512.83	505.283	3	9	7.1.1.1461.8
fig|11428.3.peg.4831	0.280669	52.25	IEAEARAR		missed R-A@6	-0.00737712	914.486	458.25	914.493	458.254	2	7	6.1.1.1511.2
fig|11428.3.peg.4831	0.115771	26.86	GLAEAEAK			-0.000521629	787.407	394.711	787.408	394.711	2	5	1.1.1.1207.2
fig|11428.3.peg.4831	0.0457575	18.64	QYDAEVKK	Gln->pyro-Glu@N-term	missed K-K@7	0.0109927	962.482	482.248	962.471	482.243	2	4	5.1.1.1540.10
fig|1428.368.peg.2741	2	99	ADLDEILTLFTTLQK			0.00414709	1719.93	574.318	1719.93	574.317	3	22	10.1.1.4608.2
fig|1428.368.peg.2741	2	99	AIQTSNLGYPR		cleaved M-A@N-term	-0.00130592	1218.63	610.324	1218.64	610.325	2	19	1.1.1.1519.5
fig|1428.368.peg.2741	2	99	ALDADVISIETSR			-0.00300075	1388.71	695.363	1388.71	695.365	2	22	1.1.1.1781.5
fig|1428.368.peg.2741	2	99	DHVASEMTK			0.000636102	1016.46	509.237	1016.46	509.237	2	12	1.1.1.1251.3
fig|1428.368.peg.2741	2	99	EGNLNAIAK			-0.00209714	928.496	465.255	928.498	465.256	2	9	15.1.1.1553.4
fig|1428.368.peg.2741	2	99	ETVYAQSLTEK			-0.0184098	1267.61	634.813	1267.63	634.822	2	12	7.1.1.1504.19
fig|1428.368.peg.2741	2	99	EVPNANLLLQTYFDSVEENYEEIITFPVSSVGLDFVHGK			0.0216611	4412.19	1104.06	4412.17	1104.05	4	25	14.1.1.4705.4
fig|1428.368.peg.2741	2	99	EVSYQIALALR			-0.00373727	1261.7	631.857	1261.7	631.859	2	18	13.1.1.2017.3
fig|1428.368.peg.2741	2	99	GIELIPVGDFTYYDHVLDTAYMLGFIPSR			0.00486677	3301.64	1101.56	3301.64	1101.55	3	15	13.1.1.4323.2
fig|1428.368.peg.2741	2	99	GIGLGVYDIHSPR			0.00151014	1382.73	461.918	1382.73	461.917	3	18	1.1.1.1651.2
fig|1428.368.peg.2741	2	99	GLGVYDIHSPR		cleaved I-G@N-term	0.000697906	1212.63	607.32	1212.63	607.32	2	18	2.1.1.1791.6
fig|1428.368.peg.2741	2	99	GMLTGPVTILNWSFVR			-0.00124754	1789.95	895.984	1789.95	895.985	2	24	1.1.1.2850.3
fig|1428.368.peg.2741	2	99	GSKDHVASEMTK		missed K-D@3	-0.00249989	1288.61	645.31	1288.61	645.311	2	15	1.1.1.1232.4
fig|1428.368.peg.2741	2	99	GYKQDQFATILK	Deamidated(Q)@4	missed K-Q@3	0.00193566	1411.74	471.586	1411.73	471.586	3	14	15.1.1.1821.4
fig|1428.368.peg.2741	2	99	HEIELLESSGIR			-0.00147064	1381.72	691.867	1381.72	691.867	2	21	1.1.1.1630.7
fig|1428.368.peg.2741	2	99	HTTYEK			0.000929615	777.367	389.691	777.366	389.69	2	9	13.1.1.1005.2
fig|1428.368.peg.2741	2	99	IDEEQFLTTMK			-0.000759257	1353.65	677.831	1353.65	677.832	2	17	14.1.1.1988.2
fig|1428.368.peg.2741	2	99	KEVSYQIALALR		missed K-E@1	0.0025879	1389.8	464.274	1389.8	464.273	3	15	2.1.1.1827.3
fig|1428.368.peg.2741	2	99	KEVSYQIALALRHEIELLESSGIR		missed K-E@1; missed R-H@12	0.000966798	2753.51	689.384	2753.51	689.384	4	29	6.1.1.2268.2
fig|1428.368.peg.2741	2	99	KEWRNGVISNEQYGQFIEK	Deamidated(N)@5	missed K-E@1; missed R-N@4	0.00597066	2325.15	582.293	2325.14	582.292	4	18	14.1.1.1849.6
fig|1428.368.peg.2741	2	99	KEWRNGVISNEQYGQFIEKETEK	Deamidated(N)@5	missed K-E@1; missed R-N@4; missed K-E@19	-0.000789318	2812.37	704.099	2812.37	704.099	4	19	14.1.1.1875.8
fig|1428.368.peg.2741	2	99	KTEEVIPALEHMVQAAK		missed K-T@1	0.00262824	1893.01	632.009	1893	632.008	3	29	13.1.1.1953.2
fig|1428.368.peg.2741	2	99	LAGFSFTK			-0.00303995	869.462	435.738	869.465	435.74	2	12	13.1.1.1613.2
fig|1428.368.peg.2741	2	99	LEELVLIHSALTQGTESISNELETYR			0.00596503	2944.51	982.51	2944.5	982.508	3	29	15.1.1.3431.2
fig|1428.368.peg.2741	2	99	LYEEAKQELGVDGKPVILGPYTFLK		missed K-Q@6	0.0132921	2806.53	936.517	2806.52	936.513	3	25	1.1.1.2159.4
fig|1428.368.peg.2741	2	99	NAHHTIR			0.000272462	847.442	424.728	847.441	424.728	2	10	13.1.1.974.2
fig|1428.368.peg.2741	2	99	NGVISNEQYGQFIEK			0.0010168	1724.84	863.426	1724.84	863.426	2	20	14.1.1.1875.13
fig|1428.368.peg.2741	2	99	NGVISNEQYGQFIEKETEK		missed K-E@15	0.00484437	2212.07	738.364	2212.06	738.362	3	16	14.1.1.1891.11
fig|1428.368.peg.2741	2	99	NGWVQSYGSR	Deamidated(N)@1		-0.000683955	1153.51	577.764	1153.52	577.765	2	15	4.1.1.1712.13
fig|1428.368.peg.2741	2	99	QDQFATILK			-0.00283153	1062.57	532.291	1062.57	532.293	2	15	13.1.1.1611.3
fig|1428.368.peg.2741	2	99	QELGVDGKPVILGPYTFLK	Gln->pyro-Glu@N-term		-0.00348551	2056.12	1029.07	2056.12	1029.07	2	24	1.1.1.2480.6
fig|1428.368.peg.2741	2	99	QLVTPYVQLLSELHAAGAQIIQVDEPIFASLTK			0.0056473	3591.96	1198.33	3591.96	1198.33	3	18	13.1.1.4710.2
fig|1428.368.peg.2741	2	99	SHGEFIDTLK			-0.00220921	1145.57	573.792	1145.57	573.793	2	16	1.1.1.1523.8
fig|1428.368.peg.2741	2	99	SHGEFIDTLKHTTYEK		missed K-H@10	0.00500922	1904.93	477.24	1904.93	477.239	4	17	6.1.1.1504.9
fig|1428.368.peg.2741	2	99	TALKEEDFSRPLPFEK		missed K-E@4	0.000988194	1905.98	636.336	1905.98	636.335	3	25	1.1.1.1644.6
fig|1428.368.peg.2741	2	99	TALKEEDFSRPLPFEKR		missed K-E@4; missed K-R@16	0.00452951	2062.09	516.53	2062.08	516.528	4	16	2.1.1.1729.11
fig|1428.368.peg.2741	2	99	TDMVEYFGER			-0.00476913	1245.53	623.772	1245.53	623.774	2	17	1.1.1.1723.2
fig|1428.368.peg.2741	2	99	TEEVIPALEHMVQAAK			0.00319523	1764.91	589.311	1764.91	589.31	3	22	1.1.1.2198.2
fig|1428.368.peg.2741	2	99	TLAVGCIDGR	Carbamidomethyl(C)@6		-0.00259407	1060.53	531.273	1060.53	531.274	2	16	1.1.1.1529.9
fig|1428.368.peg.2741	2	99	TLEAFWSNK			-0.00403902	1094.54	548.275	1094.54	548.277	2	15	13.1.1.1745.2
fig|1428.368.peg.2741	2	99	TLEAFWSNKIDEEQFLTTMK		missed K-I@9	0.00863281	2430.19	811.069	2430.18	811.067	3	26	1.1.1.2348.2
fig|1428.368.peg.2741	2	99	TTIGSFPQTTEVR		cleaved T-T@N-term	-0.00364973	1435.73	718.871	1435.73	718.873	2	13	5.1.1.1788.25
fig|1428.368.peg.2741	2	99	VIQVDEPALR			-0.000144933	1138.63	380.552	1138.63	380.552	3	16	1.1.1.1575.2
fig|1428.368.peg.2741	2	99	VPSKDEMFEIVEQSLQVCDPK	Carbamidomethyl(C)@18	missed K-D@4	-0.00225834	2477.18	826.734	2477.18	826.735	3	20	13.1.1.2717.2
fig|1428.368.peg.2741	2	99	WFNTNYHYIVPEYEEGLQISLK			0.00390118	2742.34	915.12	2742.33	915.118	3	21	6.1.1.2164.4
fig|1428.368.peg.2741	2	99	YFWINPDCGLK	Carbamidomethyl(C)@8		-0.00200628	1411.66	706.836	1411.66	706.837	2	17	13.1.1.2152.3
fig|1428.368.peg.2741	2	99	YGFPADK			-0.000905241	796.375	399.195	796.376	399.195	2	9	4.1.1.1580.2
fig|1428.368.peg.2741	1.92082	99	LYEEAK			-0.00187926	751.373	376.694	751.375	376.695	2	7	13.1.1.1217.2
fig|1428.368.peg.2741	1.67778	99	EEDFSRPLPFEK			1.00135	1493.72	747.868	1492.72	747.367	2	12	5.1.1.1842.22
fig|1428.368.peg.2741	1.33724	99	TALKEEDFSR		cleaved R-P@C-term; missed K-E@4	-0.0111479	1194.58	598.296	1194.59	598.301	2	9	8.1.1.1431.20
fig|1428.368.peg.2741	1.19382	94.65	EGMPLKEK		missed K-E@6	0.000500038	930.485	466.25	930.484	466.25	2	6	13.1.1.1268.4
fig|1428.368.peg.2741	1.04576	98.86	RYELQQVALQLPLLPTTTIGSFPQTTEVR	Deamidated(Q)@10	missed R-Y@1	-0.0103595	3299.77	1100.93	3299.78	1100.93	3	24	4.1.1.2681.8
fig|1428.368.peg.2741	0.621602	79.44	EIYETIRK		missed R-K@7	0.00224507	1050.57	351.198	1050.57	351.198	3	6	13.1.1.1344.2
fig|1428.368.peg.2741	0.235077	46.45	EIYETIR			0.000238212	922.476	462.245	922.476	462.245	2	7	15.1.1.1649.9
fig|1428.368.peg.2741	0.163043	35.56	DNRPLR			-0.00163748	769.418	385.716	769.419	385.717	2	6	1.1.1.1175.2
fig|1428.368.peg.2741	0.0213631	93.81	NIWRADLDEILTLFTTLQK		missed R-A@4	4.0102	2293.25	1147.63	2289.24	1145.63	2	13	15.1.1.4217.3
fig|1428.368.peg.2741	0.00305075	16.09	EDIVDAIR		cleaved F-E@N-term	0.00214874	929.484	465.749	929.482	465.748	2	7	12.1.1.1330.6
fig|1428.368.peg.2741	0.00130484	73.03	IVEQSLQVCDPK	Deamidated(Q)@7; Carbamidomethyl(C)@9	cleaved E-I@N-term	-4.74157e-05	1415.7	708.856	1415.7	708.856	2	18	6.1.1.1514.23
fig|11428.3.peg.2174	2	99	ACEMLANAGVPVGNQAVILAGINDSVPIMK	Carbamidomethyl(C)@2		-0.00105178	3051.55	1018.19	3051.56	1018.19	3	24	6.1.1.2265.4
fig|11428.3.peg.2174	2	99	AEGYFKEIYPNYEEK		missed K-E@6	0.000660113	1878.87	940.441	1878.87	940.441	2	17	2.1.1.1797.22
fig|11428.3.peg.2174	2	99	AEGYFKEIYPNYEEKR		missed K-E@6; missed K-R@15	-0.00170308	2034.97	679.33	2034.97	679.33	3	20	1.1.1.1604.20
fig|11428.3.peg.2174	2	99	APVVFPQR			-0.00246153	912.516	457.265	912.518	457.266	2	13	16.1.1.1657.2
fig|11428.3.peg.2174	2	99	DIELWKDVTEEQWNDWVWQLTNTIK		missed K-D@6	0.0164789	3188.56	1063.86	3188.55	1063.86	3	19	2.1.1.4099.2
fig|11428.3.peg.2174	2	99	DVLISGGDGLLINDKILEYVLK		missed K-I@15	0.00376124	2386.34	796.454	2386.34	796.453	3	19	5.1.1.3376.3
fig|11428.3.peg.2174	2	99	DYEDNDTHASLK			0.00726645	1406.6	469.875	1406.59	469.872	3	13	4.1.1.1466.5
fig|11428.3.peg.2174	2	99	EIPHVEIIR			0.00140852	1104.63	553.323	1104.63	553.322	2	14	15.1.1.1763.3
fig|11428.3.peg.2174	2	99	EIYPNYEEK			7.1953e-05	1183.54	592.777	1183.54	592.777	2	12	2.1.1.1600.17
fig|11428.3.peg.2174	2	99	EIYPNYEEKR		missed K-R@9	0.000831426	1339.64	670.828	1339.64	670.828	2	10	6.1.1.1421.22
fig|11428.3.peg.2174	2	99	FNLVPDDLQR			0.00287754	1215.63	608.821	1215.62	608.82	2	13	5.1.1.1946.2
fig|11428.3.peg.2174	2	99	FSGQIGMGVPK			0.000977935	1119.58	560.795	1119.57	560.795	2	18	2.1.1.1717.19
fig|11428.3.peg.2174	2	99	FSGQIGMGVPKK		missed K-K@11	-0.00399135	1247.67	416.896	1247.67	416.897	3	13	7.1.1.1495.3
fig|11428.3.peg.2174	2	99	GHTSGYAVPTFVVDAPGGGGK			0.00441202	1972.97	658.663	1972.96	658.662	3	25	1.1.1.1682.3
fig|11428.3.peg.2174	2	99	GLEIIEGLR			-0.000532845	998.576	500.295	998.576	500.295	2	14	7.1.1.2031.2
fig|11428.3.peg.2174	2	99	IALQPNYLISQSADK			-0.000562418	1659.88	830.949	1659.88	830.949	2	22	4.1.1.1891.10
fig|11428.3.peg.2174	2	99	IALQPNYLISQSADKVVLR		missed K-V@15	-0.0012613	2127.2	710.075	2127.21	710.076	3	21	1.1.1.2073.2
fig|11428.3.peg.2174	2	99	ILEYVLK			-0.00346631	876.529	439.272	876.532	439.273	2	11	13.1.1.1622.2
fig|11428.3.peg.2174	2	99	ITENLCNIIK	Carbamidomethyl(C)@6		-0.00380505	1216.64	609.33	1216.65	609.332	2	16	1.1.1.1685.2
fig|11428.3.peg.2174	2	99	ITENLCNIIKK	Carbamidomethyl(C)@6	missed K-K@10	0.00160525	1344.75	673.38	1344.74	673.379	2	14	5.1.1.1772.23
fig|11428.3.peg.2174	2	99	KACEMLANAGVPVGNQAVILAGINDSVPIMK	Carbamidomethyl(C)@3	missed K-A@1	0.00429539	3179.65	1060.89	3179.65	1060.89	3	24	6.1.1.2173.12
fig|11428.3.peg.2174	2	99	KDYEDNDTHASLK		missed K-D@1	-0.00171232	1534.69	512.57	1534.69	512.571	3	12	5.1.1.1474.4
fig|11428.3.peg.2174	2	99	KFNLVPDDLQR		missed K-F@1	0.00179337	1343.72	672.868	1343.72	672.867	2	12	2.1.1.1787.17
fig|11428.3.peg.2174	2	99	KLMHDLVK		missed K-L@1	0.000367125	982.564	492.289	982.563	492.289	2	13	2.1.1.1468.2
fig|11428.3.peg.2174	2	99	KQLDDAIAYIR		missed K-Q@1	-0.000207566	1304.71	435.91	1304.71	435.91	3	16	1.1.1.1629.2
fig|11428.3.peg.2174	2	99	KVINLTPEEEEGVK		missed K-V@1	-0.0043756	1583.84	792.925	1583.84	792.928	2	21	6.1.1.1495.14
fig|11428.3.peg.2174	2	99	LEENDKKTEGDAV		missed K-K@6; missed K-T@7	-0.00095534	1446.68	724.349	1446.68	724.349	2	16	8.1.1.1299.6
fig|11428.3.peg.2174	2	99	LHDVYKPNR		cleaved M-L@N-term	0.00299198	1140.61	381.21	1140.6	381.209	3	8	1.1.1.1294.4
fig|11428.3.peg.2174	2	99	LMHDLVK			-0.00169749	854.467	428.241	854.468	428.241	2	11	3.1.1.1578.7
fig|11428.3.peg.2174	2	99	MLHDVYKPNR			0.00116392	1271.65	424.889	1271.64	424.889	3	15	2.1.1.1467.2
fig|11428.3.peg.2174	2	99	MQSVPISEELYK	Oxidation(M)@1		-0.00180724	1438.7	720.357	1438.7	720.358	2	17	1.1.1.1622.5
fig|11428.3.peg.2174	2	99	NFEGVITTYPEPESYIPGR			1.86444e-05	2168.04	723.688	2168.04	723.688	3	21	4.1.1.2037.5
fig|11428.3.peg.2174	2	99	QLDDAIAYIR			-0.000512702	1176.61	589.314	1176.61	589.314	2	15	2.1.1.1871.2
fig|11428.3.peg.2174	2	99	RFSGQIGMGVPK		missed R-F@1	0.000949361	1275.68	426.233	1275.68	426.233	3	14	4.1.1.1646.4
fig|11428.3.peg.2174	2	99	RKDYEDNDTHASLK		missed R-K@1; missed K-D@2	0.00207661	1690.79	564.605	1690.79	564.604	3	14	1.1.1.1273.6
fig|11428.3.peg.2174	2	99	RKDYEDNDTHASLKDK		missed R-K@1; missed K-D@2; missed K-D@14	0.00248364	1933.92	484.486	1933.91	484.486	4	8	5.1.1.1424.4
fig|11428.3.peg.2174	2	99	RKDYEDNDTHASLKDKR		missed R-K@1; missed K-D@2; missed K-D@14; missed K-R@16	0.00892391	2090.02	523.513	2090.01	523.511	4	21	1.1.1.1243.3
fig|11428.3.peg.2174	2	99	RSDVGIAGLMSDK		missed R-S@1	-0.00232285	1347.68	674.847	1347.68	674.848	2	22	1.1.1.1603.9
fig|11428.3.peg.2174	2	99	RSDVGIAGLMSDKK		missed R-S@1; missed K-K@13	9.2078e-05	1475.78	492.933	1475.78	492.933	3	15	2.1.1.1646.10
fig|11428.3.peg.2174	2	99	SDVGIAGLMSDK			0.00145251	1191.58	596.798	1191.58	596.798	2	17	2.1.1.1835.7
fig|11428.3.peg.2174	2	99	SDVGIAGLMSDKK		missed K-K@12	-0.00086498	1319.67	660.845	1319.68	660.845	2	18	5.1.1.1783.12
fig|11428.3.peg.2174	2	99	TIPLNITPYYAWLMNPDDPR			0.00532439	2389.18	797.402	2389.18	797.4	3	19	6.1.1.2415.2
fig|11428.3.peg.2174	2	99	TKYDLEDPLHEDEDSPVPGLTHR		missed K-Y@2	0.00433078	2662.26	888.426	2662.25	888.424	3	22	2.1.1.1810.15
fig|11428.3.peg.2174	2	99	TKYDLEDPLHEDEDSPVPGLTHRYPDR		missed K-Y@2; missed R-Y@23	0.0144328	3193.51	639.709	3193.5	639.706	5	21	2.1.1.1797.14
fig|11428.3.peg.2174	2	99	TLDDLRK		missed R-K@6	-0.00182256	859.474	430.745	859.476	430.745	2	6	7.1.1.1342.7
fig|11428.3.peg.2174	2	99	VINLTPEEEEGVK			0.00174559	1455.75	728.881	1455.75	728.88	2	14	4.1.1.1716.23
fig|11428.3.peg.2174	2	99	VINLTPEEEEGVKISTK		missed K-I@13	-0.000604563	1885	629.342	1885	629.342	3	17	1.1.1.1625.11
fig|11428.3.peg.2174	2	99	VLFLVTNQCSMYCR	Carbamidomethyl(C)@9; Carbamidomethyl(C)@13		-0.000644286	1789.83	597.617	1789.83	597.618	3	20	4.1.1.1970.3
fig|11428.3.peg.2174	2	99	VRPYYIYQCDLSEGIGHFR	Carbamidomethyl(C)@9		0.0124184	2372.15	594.045	2372.14	594.042	4	22	6.1.1.1914.2
fig|11428.3.peg.2174	1.31876	96.02	ETPQVR			-0.00173184	728.38	365.197	728.382	365.198	2	7	6.1.1.1217.2
fig|11428.3.peg.2174	1.20761	94.81	TIPLNITPYYAWLMNPDDPRCPIR	Carbamidomethyl(C)@21	missed R-C@20	0.00220632	2915.45	972.823	2915.45	972.823	3	11	6.1.1.2286.5
fig|11428.3.peg.2174	0.623423	79.54	MLHDVYKPNRHWK		missed R-H@10	-0.000758572	1722.88	431.726	1722.88	431.727	4	7	9.1.1.1369.6
fig|11428.3.peg.2174	0.517126	97.23	PHVEIIR		cleaved I-P@N-term	-0.00261701	862.5	432.257	862.503	432.259	2	10	6.1.1.1576.3
fig|11428.3.peg.2174	0.181774	38.71	DIELWK			-0.000332736	802.422	402.218	802.422	402.219	2	4	4.1.1.1857.2
fig|11428.3.peg.2174	0.0535477	64.14	PLHEDEDSPVPGLTHR		cleaved D-P@N-term	0.0218816	1797.89	600.303	1797.86	600.295	3	9	6.1.1.1473.16
fig|1428.368.peg.5202	2	99	AKDLGTSKEQAITIQSSSGLSDEEVDR		missed K-D@2; missed K-E@8	0.0106371	2863.42	716.861	2863.4	716.858	4	21	16.1.1.1707.11
fig|1428.368.peg.5202	2	99	AKFEELSAGLVER		missed K-F@2	-0.0014683	1447.77	724.89	1447.77	724.891	2	22	1.1.1.1633.12
fig|1428.368.peg.5202	2	99	AKFEELSAGLVERT		cleaved T-L@C-term; missed K-F@2; missed R-T@13	-0.000603306	1548.81	517.279	1548.81	517.279	3	14	5.1.1.1855.5
fig|1428.368.peg.5202	2	99	ASAEAYLGETVTK			-0.00500598	1338.66	670.338	1338.67	670.341	2	13	4.1.1.1713.20
fig|1428.368.peg.5202	2	99	AVITVPAYFNDAER			-0.00248735	1564.79	783.4	1564.79	783.402	2	15	7.1.1.2110.3
fig|1428.368.peg.5202	2	99	DAGFAPSELDK			0.000431362	1148.54	575.275	1148.53	575.275	2	14	16.1.1.1726.5
fig|1428.368.peg.5202	2	99	DAGFAPSELDKVILVGGSTR		missed K-V@11	0.00140576	2031.07	678.029	2031.06	678.029	3	27	17.1.1.2137.2
fig|1428.368.peg.5202	2	99	DALQEIVQQLSVK			0.0020975	1469.81	735.913	1469.81	735.912	2	21	17.1.1.2719.2
fig|1428.368.peg.5202	2	99	DFTPQEISAIILQNLK			0.00382952	1829	610.673	1828.99	610.672	3	23	17.1.1.3423.2
fig|1428.368.peg.5202	2	99	DLEGKVDAAEVAK		missed K-V@5	-0.00551514	1343.69	672.851	1343.69	672.854	2	22	1.1.1.1487.19
fig|1428.368.peg.5202	2	99	DLGTSKEQAITIQSSSGLSDEEVDR		missed K-E@6	0.0118996	2664.28	889.102	2664.27	889.098	3	15	17.1.1.1831.9
fig|1428.368.peg.5202	2	99	DNVVDAEFEEVKEDK		missed K-E@12	-0.00392253	1764.8	883.408	1764.81	883.41	2	15	17.1.1.1877.10
fig|1428.368.peg.5202	2	99	EALQAAIEK			0.000515613	971.529	486.772	971.529	486.772	2	8	17.1.1.1633.4
fig|1428.368.peg.5202	2	99	EALQAAIEKNDLDEIR		missed K-N@9	-0.000105127	1826.94	609.986	1826.94	609.986	3	22	13.1.1.1652.2
fig|1428.368.peg.5202	2	99	ENNIDLSQDK			-0.000607502	1174.55	588.28	1174.55	588.281	2	11	7.1.1.1409.17
fig|1428.368.peg.5202	2	99	ENNIDLSQDKMALQR		missed K-M@10	-0.0118162	1773.86	887.935	1773.87	887.941	2	14	7.1.1.1581.18
fig|1428.368.peg.5202	2	99	EQAITIQSSSGLSDEEVDR			0.00546801	2062.97	1032.49	2062.97	1032.49	2	20	13.1.1.1578.10
fig|1428.368.peg.5202	2	99	FEELSAGLVER			-0.000165093	1248.63	625.325	1248.64	625.325	2	13	17.1.1.1863.4
fig|1428.368.peg.5202	2	99	FQLTDLPPAPR			0.00187408	1253.68	627.847	1253.68	627.846	2	18	2.1.1.1870.3
fig|1428.368.peg.5202	2	99	HMGTDYKVEVEGK		missed K-V@7	0.00333051	1491.71	498.243	1491.7	498.242	3	13	7.1.1.1419.12
fig|1428.368.peg.5202	2	99	IAGLEVER			-0.00325754	885.489	443.752	885.492	443.753	2	11	16.1.1.1644.2
fig|1428.368.peg.5202	2	99	IINEPTAAALAYGLEK			-0.00118132	1672.9	837.458	1672.9	837.459	2	23	8.1.1.2199.3
fig|1428.368.peg.5202	2	99	IINEPTAAALAYGLEKQDEEQK		missed K-Q@16	-0.00456837	2430.22	811.082	2430.23	811.083	3	18	7.1.1.2092.3
fig|1428.368.peg.5202	2	99	IPAVQEAIKR	Deamidated(Q)@5	missed K-R@9	0.0143562	1124.67	563.342	1124.66	563.335	2	13	7.1.1.1469.8
fig|1428.368.peg.5202	2	99	KDNVVDAEFEEVKEDK		missed K-D@1; missed K-E@13	0.00118062	1892.9	631.974	1892.9	631.974	3	26	1.1.1.1570.18
fig|1428.368.peg.5202	2	99	KENNIDLSQDK		missed K-E@1	-4.07162e-05	1302.64	435.221	1302.64	435.221	3	9	17.1.1.1476.3
fig|1428.368.peg.5202	2	99	LGGDDFDQVIIDHLVAEFK			0.00580234	2130.07	711.03	2130.06	711.028	3	27	7.1.1.3555.2
fig|1428.368.peg.5202	2	99	LGGDDFDQVIIDHLVAEFKK		missed K-K@19	0.00835812	2258.17	753.73	2258.16	753.727	3	26	7.1.1.3130.2
fig|1428.368.peg.5202	2	99	LIERNTTIPTSK	Deamidated(N)@5	missed R-N@4	-0.000287523	1372.76	458.593	1372.76	458.593	3	11	7.1.1.1432.8
fig|1428.368.peg.5202	2	99	LYEQAQAAAGQAEGAQGAQDAGAK			0.00419245	2303.08	1152.55	2303.08	1152.55	2	22	1.1.1.1509.26
fig|1428.368.peg.5202	2	99	LYEQAQAAAGQAEGAQGAQDAGAKK		missed K-K@24	0.00105574	2431.17	811.399	2431.17	811.398	3	25	1.1.1.1475.25
fig|1428.368.peg.5202	2	99	MVQEAEANADADQK			0.00125645	1518.66	760.339	1518.66	760.338	2	12	1.1.1.1340.18
fig|1428.368.peg.5202	2	99	MVQEAEANADADQKR		missed K-R@14	-0.00239575	1674.76	559.261	1674.76	559.262	3	17	7.1.1.1333.5
fig|1428.368.peg.5202	2	99	NEADQLVFQTDK			-0.00619765	1406.66	704.338	1406.67	704.341	2	12	2.1.1.1749.14
fig|1428.368.peg.5202	2	99	NTTIPTSK			-0.00104138	860.459	431.237	860.46	431.237	2	9	7.1.1.1298.5
fig|1428.368.peg.5202	2	99	QAITNPNTIMSVK			-0.000179225	1415.74	708.879	1415.74	708.879	2	17	9.1.1.1587.17
fig|1428.368.peg.5202	2	99	QVGEVAKR		missed K-R@7	-0.00120326	885.502	443.758	885.503	443.759	2	8	7.1.1.1185.2
fig|1428.368.peg.5202	2	99	RHMGTDYKVEVEGK		missed R-H@1; missed K-V@8	0.00761856	1647.81	412.96	1647.8	412.958	4	11	16.1.1.1485.3
fig|1428.368.peg.5202	2	99	RKEEVELR		missed R-K@1; missed K-E@2	-1.81389e-05	1057.59	353.537	1057.59	353.537	3	7	17.1.1.1368.2
fig|1428.368.peg.5202	2	99	RKEEVELRNEADQLVFQTDK		missed R-K@1; missed K-E@2; missed R-N@8	-0.00263186	2446.24	612.568	2446.25	612.569	4	14	11.1.1.1911.4
fig|1428.368.peg.5202	2	99	RQAITNPNTIMSVK		missed R-Q@1	-0.00709208	1571.84	786.926	1571.85	786.93	2	11	9.1.1.1506.26
fig|1428.368.peg.5202	2	99	SCVAVMEGGEPK	Carbamidomethyl(C)@2	cleaved N-S@N-term	0.00459774	1262.57	632.291	1262.56	632.289	2	9	18.1.1.1624.22
fig|1428.368.peg.5202	2	99	SQVFSTAADNQPAVDIHVLQGERPMSADNK			0.00519777	3224.56	807.147	3224.55	807.145	4	19	17.1.1.1915.7
fig|1428.368.peg.5202	2	99	TLEPTRR		missed R-R@6	-0.00128235	871.486	436.75	871.488	436.751	2	6	7.1.1.1236.4
fig|1428.368.peg.5202	2	99	TTPSVVAFK			-0.00225039	948.526	475.27	948.528	475.271	2	8	18.1.1.1715.2
fig|1428.368.peg.5202	2	99	TTPSVVAFKNEER		missed K-N@9	-0.0119236	1476.75	739.38	1476.76	739.386	2	17	6.1.1.1476.8
fig|1428.368.peg.5202	2	99	VILVGGSTR			-0.00305091	900.536	451.275	900.539	451.277	2	9	16.1.1.1590.4
fig|1428.368.peg.5202	2	99	VVKDLEGKVDAAEVAK		missed K-D@3; missed K-V@8	-0.00754477	1669.92	835.966	1669.93	835.97	2	15	6.1.1.1464.24
fig|1428.368.peg.5202	1.74473	98.53	TLEPTR			0.000445465	715.387	358.701	715.386	358.701	2	5	7.1.1.1279.3
fig|1428.368.peg.5202	1.11351	93.65	VIPNPEGNR			-0.00276671	994.517	498.266	994.52	498.267	2	8	18.1.1.1543.8
fig|1428.368.peg.5202	0.688246	82.58	MVQEAEANADADQKRKEEVELR		missed K-R@14; missed R-K@15; missed K-E@16	-0.00284947	2558.24	640.566	2558.24	640.567	4	7	7.1.1.1440.17
fig|1428.368.peg.5202	0.489455	71.86	IPAVQEAIK			-0.00410573	967.566	484.79	967.57	484.792	2	6	18.1.1.1684.6
fig|1428.368.peg.5202	0.16877	97.72	KLYEQAQAAAGQAEGAQGAQDAGAK		cleaved V-K@N-term; missed K-L@1	-0.00139965	2431.17	811.398	2431.17	811.398	3	12	7.1.1.1506.15
fig|1428.368.peg.5202	0.0996329	24.01	LKDAAEK		missed K-D@2	0.000234271	773.429	387.722	773.428	387.721	2	5	9.1.1.1017.2
fig|1428.368.peg.3386	2	99	APEGYVISWDLK			0.00931734	1376.71	689.361	1376.7	689.356	2	16	10.1.1.2438.11
fig|1428.368.peg.3386	2	99	APEHYELDKTPILFEIEK		missed K-T@9	0.00838225	2171.12	724.715	2171.11	724.712	3	20	10.1.1.2288.8
fig|1428.368.peg.3386	2	99	APEHYNLNETPIK			0.000950883	1524.76	509.26	1524.76	509.26	3	18	14.1.1.1684.6
fig|1428.368.peg.3386	2	99	APEHYQLDSK			-0.00170546	1186.56	396.527	1186.56	396.528	3	12	12.1.1.1386.3
fig|1428.368.peg.3386	2	99	AYILEYR			1.42202e-05	926.486	464.25	926.486	464.25	2	11	10.1.1.1764.2
fig|1428.368.peg.3386	2	99	AYQIEYTTK			-0.000836308	1115.55	558.782	1115.55	558.782	2	14	10.1.1.1627.9
fig|1428.368.peg.3386	2	99	DAANFDPDAFTK			-0.00225934	1310.58	656.295	1310.58	656.296	2	14	11.1.1.1948.8
fig|1428.368.peg.3386	2	99	DATNHIIDEAK			0.0102377	1225.6	613.809	1225.59	613.804	2	9	2.1.1.1539.23
fig|1428.368.peg.3386	2	99	DLQGDLVADQK			0.00187896	1200.6	601.308	1200.6	601.307	2	14	10.1.1.1697.9
fig|1428.368.peg.3386	2	99	DTANELKQGTDYK		missed K-Q@7	0.00122983	1481.7	494.908	1481.7	494.907	3	12	14.1.1.1583.10
fig|1428.368.peg.3386	2	99	ELTTNNNGQIIIDK			-0.00236215	1571.81	786.914	1571.82	786.915	2	18	10.1.1.1704.10
fig|1428.368.peg.3386	2	99	ESQATAINVTAK			-0.00659038	1231.63	616.824	1231.64	616.828	2	16	11.1.1.1655.3
fig|1428.368.peg.3386	2	99	FTISEDQTTIVNR			0.00051746	1522.76	762.389	1522.76	762.389	2	23	10.1.1.1782.3
fig|1428.368.peg.3386	2	99	GAEADPADYK			-0.00375807	1035.45	518.731	1035.45	518.733	2	10	11.1.1.1595.10
fig|1428.368.peg.3386	2	99	HYDLNETPIK			0.00124975	1228.61	615.312	1228.61	615.312	2	16	10.1.1.1623.3
fig|1428.368.peg.3386	2	99	ISVSDLRPGNYQFIETTAPK			0.00101411	2235.15	746.059	2235.15	746.058	3	12	10.1.1.2288.10
fig|1428.368.peg.3386	2	99	ISVSHLRPGDYQFIETK			-0.000425049	1989.03	498.265	1989.03	498.265	4	14	11.1.1.1923.4
fig|1428.368.peg.3386	2	99	ITTDKDGIAK		missed K-D@5	-0.00653409	1060.57	531.292	1060.58	531.295	2	9	12.1.1.1321.9
fig|1428.368.peg.3386	2	99	IVDDKNNDVHTNLTTDNNGK		missed K-N@5	-0.0002683	2226.05	557.52	2226.05	557.52	4	9	15.1.1.1523.10
fig|1428.368.peg.3386	2	99	IVNDKNEDVR		missed K-N@5	0.00144592	1200.61	401.211	1200.61	401.211	3	7	12.1.1.1288.5
fig|1428.368.peg.3386	2	99	IVVENLRPGTYQFVETTAPK			-0.0108478	2261.19	754.739	2261.21	754.742	3	17	11.1.1.2008.11
fig|1428.368.peg.3386	2	99	KITTDKDGIAK		missed K-I@1; missed K-D@6	-0.00267655	1188.67	397.23	1188.67	397.231	3	13	10.1.1.1361.3
fig|1428.368.peg.3386	2	99	LKPGTYYLQETK			0.00357336	1439.77	480.93	1439.77	480.929	3	17	10.1.1.1651.3
fig|1428.368.peg.3386	2	99	LLFNDQVETSK			-0.00278676	1292.66	647.337	1292.66	647.338	2	12	10.1.1.1774.3
fig|1428.368.peg.3386	2	99	LTTNEHGQIEAK			-0.0093687	1339.66	670.839	1339.67	670.844	2	17	12.1.1.1350.12
fig|1428.368.peg.3386	2	99	LTVTNTETTETIEVR			-0.000681907	1705.87	853.944	1705.87	853.944	2	24	10.1.1.1752.4
fig|1428.368.peg.3386	2	99	LVTGDTVTNYTVSK			-0.00571124	1496.77	749.391	1496.77	749.393	2	19	10.1.1.1687.23
fig|1428.368.peg.3386	2	99	MDLTTDTNGTIK			-0.00341983	1308.62	655.317	1308.62	655.319	2	15	12.1.1.1592.4
fig|1428.368.peg.3386	2	99	NAIFKDNIPQGTSLNK		missed K-D@5	0.00138242	1758.93	587.317	1758.93	587.316	3	18	10.1.1.1729.7
fig|1428.368.peg.3386	2	99	NAPLAGAEFTLYDR			-0.000528197	1536.76	769.386	1536.76	769.386	2	16	11.1.1.2064.4
fig|1428.368.peg.3386	2	99	NTETTETIEVR		cleaved T-N@N-term	-0.000145232	1291.63	646.82	1291.63	646.82	2	16	1.1.1.1442.23
fig|1428.368.peg.3386	2	99	QITTNILTGVK			0.00034024	1186.69	594.354	1186.69	594.353	2	16	10.1.1.1818.5
fig|1428.368.peg.3386	2	99	QQNASSTVTVSR	Gln->pyro-Glu@N-term		-0.00319283	1259.61	630.811	1259.61	630.813	2	13	2.1.1.1521.23
fig|1428.368.peg.3386	2	99	QSINSPYYIIFK			-0.002185	1471.77	736.892	1471.77	736.893	2	19	10.1.1.2732.7
fig|1428.368.peg.3386	2	99	SGDYYIFDLPK			-0.00237771	1316.63	659.321	1316.63	659.322	2	19	11.1.1.2222.2
fig|1428.368.peg.3386	2	99	SLINADDKEK		missed K-E@8	0.000681916	1131.58	378.2	1131.58	378.2	3	11	10.1.1.1458.2
fig|1428.368.peg.3386	2	99	SQLAHVSVTAK			-0.00200638	1139.63	570.821	1139.63	570.822	2	14	10.1.1.1501.11
fig|1428.368.peg.3386	2	99	SQTSIIPITAK			-0.0013832	1157.66	579.839	1157.67	579.84	2	13	13.1.1.1547.4
fig|1428.368.peg.3386	2	99	TELVTNQEGK			-0.00324043	1117.56	559.786	1117.56	559.788	2	6	12.1.1.1374.13
fig|1428.368.peg.3386	2	99	TKPTGNVITDGK			0.010433	1229.67	410.898	1229.66	410.894	3	13	12.1.1.1350.4
fig|1428.368.peg.3386	2	99	TLAGAEFTVQDR			0.0138776	1306.67	654.34	1306.65	654.333	2	11	13.1.1.1539.14
fig|1428.368.peg.3386	2	99	VIHKDLVTNSDGK		missed K-D@4	-0.00541922	1424.76	475.926	1424.76	475.928	3	12	12.1.1.1338.8
fig|1428.368.peg.3386	2	99	VISEHKELTTNNNGQIIIDK		missed K-E@6	0.00292363	2265.2	567.307	2265.2	567.306	4	15	12.1.1.1553.19
fig|1428.368.peg.3386	2	99	YQFVETK			-0.000613467	913.454	457.734	913.455	457.735	2	9	14.1.1.1653.5
fig|1428.368.peg.3386	2	99	YTTDFDYTKLESGK		missed K-L@9	0.00238571	1666.77	556.599	1666.77	556.598	3	14	3.1.1.1820.6
fig|1428.368.peg.3386	1.92082	99	DNIPQGTSLNK			-0.00597323	1185.59	593.804	1185.6	593.807	2	9	12.1.1.1454.3
fig|1428.368.peg.3386	1.88606	99	IVNEKNEDVR		missed K-N@5	-0.0073518	1214.62	405.88	1214.63	405.882	3	10	12.1.1.1298.2
fig|1428.368.peg.3386	1.48149	98.7	LVPGSIEVR			1.17485e-05	968.565	485.29	968.565	485.29	2	11	12.1.1.1599.4
fig|1428.368.peg.3386	1.23657	97.69	IIATGLRPGNYK			-0.00594456	1301.74	434.921	1301.75	434.922	3	10	13.1.1.1441.7
fig|1428.368.peg.3386	1.00436	99	TSLDGELIQGTYK			-0.0287109	1423.69	712.853	1423.72	712.867	2	15	14.1.1.1858.12
fig|1428.368.peg.3386	0.958607	95.43	TEFNKAEIK		missed K-A@5	0.00209282	1078.57	360.53	1078.57	360.529	3	6	2.1.1.1476.2
fig|1428.368.peg.3386	0.575118	87.69	STPIEFTIEK			0.000207312	1163.61	582.811	1163.61	582.811	2	9	14.1.1.1872.4
fig|1428.368.peg.3386	0.481486	83.96	KGSKEDLPIPVTVK		missed K-G@1; missed K-E@4	0.00215875	1509.88	504.3	1509.88	504.299	3	8	3.1.1.1706.8
fig|1428.368.peg.3386	0.232102	64.6	NIGQYFITAK			-0.00131645	1153.61	577.813	1153.61	577.814	2	8	4.1.1.1855.4
fig|1428.368.peg.3386	0.126679	46.64	IIREGLK		missed R-E@3	-0.0124992	827.51	414.762	827.523	414.769	2	5	2.1.1.1659.6
fig|1428.368.peg.3386	0.0925886	38.07	YTTDFDYTK			-0.0011583	1152.5	577.255	1152.5	577.256	2	9	10.1.1.1675.3
fig|1428.368.peg.3386	0.0710923	31.54	IVDMNGTVIR			0.010781	1116.61	559.311	1116.6	559.305	2	7	3.1.1.1736.12
fig|1428.368.peg.3386	0.069051	30.87	LEIAFK			0.00157884	719.423	360.719	719.422	360.718	2	6	15.1.1.1746.2
fig|1428.368.peg.3386	0.051587	24.54	TPISFTIEK		cleaved E-T@N-term	-0.00204191	1034.56	518.289	1034.56	518.29	2	6	11.1.1.1925.6
fig|1428.368.peg.3386	0.0486625	23.37	LEGAVFK		cleaved T-L@N-term	-0.000194713	762.427	382.221	762.428	382.221	2	4	12.1.1.1527.3
fig|1428.368.peg.3386	0.0150229	61.94	KDLVTNEQGK		cleaved H-K@N-term; missed K-D@1	0.0286232	1130.62	377.881	1130.59	377.872	3	5	1.1.1.1331.2
fig|1428.368.peg.3386	0.0123337	85.3	KGGIELTK		cleaved T-K@N-term; missed K-G@1	0.000423061	844.502	423.258	844.502	423.258	2	10	7.1.1.1286.3
fig|1428.368.peg.3386	0.00833099	71.5	HYVLNQTPIK	Deamidated(N)@5; Deamidated(Q)@6		-0.00193364	1213.63	405.551	1213.63	405.552	3	13	3.1.1.1704.4
fig|1428.368.peg.3386	0.00305075	30.99	EIAFLK		cleaved F-E@N-term	0.00157885	719.423	360.719	719.422	360.718	2	7	15.1.1.1746.2
fig|11428.3.peg.2069	2	99	AAFLQNEGTETPVFVR			-0.00643077	1777.89	889.954	1777.9	889.957	2	26	1.1.1.1925.4
fig|11428.3.peg.2069	2	99	ADQEYGMR			-0.00365415	968.398	485.207	968.402	485.208	2	7	2.1.1.1459.11
fig|11428.3.peg.2069	2	99	AYRDSTMKVEGYVSR	Oxidation(M)@7	missed R-D@3; missed K-V@8	0.00139162	1776.85	593.29	1776.85	593.289	3	10	1.1.1.1427.16
fig|11428.3.peg.2069	2	99	DAIKFPDMVHSLKPAPDTNIQTPDR		missed K-F@4	0.0121608	2805.42	702.363	2805.41	702.36	4	30	2.1.1.1860.13
fig|11428.3.peg.2069	2	99	DFNHATR			0.000843336	859.394	430.704	859.394	430.704	2	10	13.1.1.1173.3
fig|11428.3.peg.2069	2	99	DGAMQVNQNPSTINYEPSR			-0.000802682	2119.96	1060.99	2119.96	1060.99	2	19	1.1.1.1576.20
fig|11428.3.peg.2069	2	99	DGAMQVNQNPSTINYEPSRHAENPVEDK		missed R-H@19	0.0105556	3139.44	785.866	3139.43	785.864	4	19	1.1.1.1541.24
fig|11428.3.peg.2069	2	99	DLFDAIEK			-0.0041628	949.471	475.743	949.476	475.745	2	13	13.1.1.1913.2
fig|11428.3.peg.2069	2	99	DSTMKVEGYVSR	Oxidation(M)@4	missed K-V@5	0.0120988	1386.66	463.226	1386.64	463.222	3	15	1.1.1.1427.9
fig|11428.3.peg.2069	2	99	EEQNNLIANLTNDLKDVNER		missed K-D@15	0.00390111	2341.15	781.392	2341.15	781.391	3	19	5.1.1.2592.3
fig|11428.3.peg.2069	2	99	EKIEKPNDFK	Deamidated(N)@7	missed K-I@2	0.00223331	1247.64	624.828	1247.64	624.827	2	15	2.1.1.1446.4
fig|11428.3.peg.2069	2	99	EKIEKPNDFKQAGER	Deamidated(N)@7	missed K-I@2; missed K-Q@10	0.00347438	1788.9	597.309	1788.9	597.307	3	13	1.1.1.1366.14
fig|11428.3.peg.2069	2	99	EMEGFGVHSFK			0.00204998	1266.57	634.293	1266.57	634.292	2	15	5.1.1.1769.14
fig|11428.3.peg.2069	2	99	EVQEVQGK			-0.00170845	915.464	458.74	915.466	458.74	2	13	13.1.1.1150.4
fig|11428.3.peg.2069	2	99	EVQEVQGKDFNHATR		missed K-D@8	0.00453524	1756.85	586.625	1756.85	586.624	3	17	6.1.1.1343.20
fig|11428.3.peg.2069	2	99	FPDMVHSLKPAPDTNIQTPDR			0.00295373	2378.17	595.55	2378.17	595.549	4	25	13.1.1.1613.10
fig|11428.3.peg.2069	2	99	FSTVIHGQGSPETAR			8.65484e-05	1585.79	793.9	1585.78	793.9	2	23	1.1.1.1442.26
fig|11428.3.peg.2069	2	99	FSTVIHGQGSPETARD		cleaved D-P@C-term; missed R-D@15	-0.0010894	1700.81	567.944	1700.81	567.945	3	19	3.1.1.1615.13
fig|11428.3.peg.2069	2	99	FSTVIHGQGSPETARDPR		missed R-D@15	0.0019952	1953.97	652.33	1953.97	652.329	3	19	13.1.1.1372.5
fig|11428.3.peg.2069	2	99	FYTEEGNYDIVGNHLPVFFIR			0.00212985	2529.23	844.086	2529.23	844.085	3	19	1.1.1.2415.2
fig|11428.3.peg.2069	2	99	GAGAHGVFVTK			0.000327366	1042.56	522.285	1042.56	522.285	2	14	1.1.1.1371.19
fig|11428.3.peg.2069	2	99	GAGAHGVFVTKNSMK	Deamidated(N)@12	missed K-N@11	0.00517085	1503.76	502.259	1503.75	502.257	3	19	1.1.1.1396.7
fig|11428.3.peg.2069	2	99	GAHGVFVTK		cleaved A-G@N-term	-0.00355078	914.494	458.254	914.497	458.256	2	7	2.1.1.1471.14
fig|11428.3.peg.2069	2	99	HAENPVEDK			-0.00342554	1037.47	519.744	1037.48	519.746	2	12	2.1.1.1294.2
fig|11428.3.peg.2069	2	99	HAENPVEDKAYR		missed K-A@9	-0.00115275	1427.68	476.9	1427.68	476.9	3	10	1.1.1.1325.7
fig|11428.3.peg.2069	2	99	HAENPVEDKAYRDSTMK		missed K-A@9; missed R-D@12	0.00442833	1989.93	664.316	1989.92	664.314	3	8	6.1.1.1368.15
fig|11428.3.peg.2069	2	99	IEKPNDFK			-0.00191467	989.516	495.765	989.518	495.766	2	8	2.1.1.1454.9
fig|11428.3.peg.2069	2	99	LAHFDR			0.00157629	757.389	379.702	757.387	379.701	2	8	13.1.1.1267.3
fig|11428.3.peg.2069	2	99	LAHFDRER		missed R-E@6	0.000412867	1042.53	522.273	1042.53	522.273	2	9	13.1.1.1246.5
fig|11428.3.peg.2069	2	99	LAQALNVDITQY		cleaved Y-V@C-term	-0.00406978	1347.7	674.857	1347.7	674.859	2	20	4.1.1.2003.4
fig|11428.3.peg.2069	2	99	LFSYPDTQR			-0.00146451	1125.54	563.779	1125.55	563.78	2	12	13.1.1.1502.7
fig|11428.3.peg.2069	2	99	LGANYLQIPVNCPYAAVQNQQR	Carbamidomethyl(C)@12		0.00604653	2516.27	839.763	2516.26	839.76	3	21	2.1.1.2137.2
fig|11428.3.peg.2069	2	99	LLAVCNFFR	Carbamidomethyl(C)@5		-0.000514196	1138.6	570.305	1138.6	570.305	2	15	2.1.1.2349.2
fig|11428.3.peg.2069	2	99	LTTNQGAPVGDNQNSR			0.00207131	1670.8	557.94	1670.8	557.94	3	13	1.1.1.1344.12
fig|11428.3.peg.2069	2	99	LTTNQGAPVGDNQNSRTAGR	Deamidated(N)@12	missed R-T@16	0.00264216	2056.99	686.671	2056.99	686.67	3	11	14.1.1.1525.11
fig|11428.3.peg.2069	2	99	MNPNNRLTTNQGAPVGDNQNSR	Oxidation(M)@1; Deamidated(N)@10	missed R-L@6	0.0187419	2414.12	805.713	2414.1	805.707	3	9	3.1.1.1593.25
fig|11428.3.peg.2069	2	99	NFFAEVEQVAFSPSATVNGIEPSEDKLLQGR	Deamidated(N)@18	missed K-L@26	-0.0069943	3379.65	1127.56	3379.66	1127.56	3	24	4.1.1.2681.9
fig|11428.3.peg.2069	2	99	NLNAKEVQEVQGK	Deamidated(N)@3	missed K-E@5	-0.00720293	1456.75	729.38	1456.75	729.383	2	14	3.1.1.1636.19
fig|11428.3.peg.2069	2	99	PSTINYEPSR		cleaved N-P@N-term	0.00473262	1162.57	582.291	1162.56	582.288	2	10	2.1.1.1547.16
fig|11428.3.peg.2069	2	99	RGPVLLEDYHLVEK		missed R-G@1	-0.00616434	1666.9	834.456	1666.9	834.459	2	20	1.1.1.1650.5
fig|11428.3.peg.2069	2	99	RLTTNQGAPVGDNQNSR		cleaved N-R@N-term; missed R-L@1	-0.00243144	1826.9	609.973	1826.9	609.973	3	15	5.1.1.1496.4
fig|11428.3.peg.2069	2	99	SFSKEEQNNLIANLTNDLKDVNER		missed K-E@4; missed K-D@19	0.00481828	2790.38	698.603	2790.38	698.602	4	25	6.1.1.2117.7
fig|11428.3.peg.2069	2	99	SLKPAPDTNIQTPDR		cleaved H-S@N-term	-0.000447557	1651.85	551.625	1651.85	551.625	3	18	15.1.1.1606.5
fig|11428.3.peg.2069	2	99	VEGYVSR			0.000597757	808.408	405.212	808.408	405.211	2	9	13.1.1.1263.8
fig|11428.3.peg.2069	2	99	WINEEGKIVYIK		missed K-I@7	-0.001303	1490.81	497.945	1490.81	497.945	3	18	1.1.1.1629.6
fig|11428.3.peg.2069	2	99	YHWKPQQGVR			0.000661098	1297.67	649.842	1297.67	649.841	2	13	14.1.1.1543.5
fig|11428.3.peg.2069	1.95861	99	LAQALNVDITQ		cleaved Q-Y@C-term	-0.00207032	1184.64	593.326	1184.64	593.327	2	15	4.1.1.1850.7
fig|11428.3.peg.2069	1.46852	99	SFSKEEQNNLIANLTNDLK	Deamidated(N)@8	missed K-E@4	-0.0026323	2178.08	727.033	2178.08	727.034	3	24	13.1.1.2412.2
fig|11428.3.peg.2069	1.26761	95.57	ERIPER		missed R-I@2	0.000915496	798.436	400.225	798.435	400.225	2	5	13.1.1.1200.2
fig|11428.3.peg.2069	1.05061	99	LEDYHLVEK		cleaved L-L@N-term	-0.00283918	1144.57	573.294	1144.58	573.295	2	14	14.1.1.1851.5
fig|11428.3.peg.2069	0.987163	97.87	EEQNNLIANLTNDLK	Deamidated(N)@4		0.00349456	1728.86	865.436	1728.85	865.434	2	23	15.1.1.2770.2
fig|11428.3.peg.2069	0.815309	87.25	LAHFDRERIPER		missed R-E@6; missed R-I@8	0.000212439	1537.81	385.46	1537.81	385.46	4	7	3.1.1.1590.3
fig|11428.3.peg.2069	0.156767	97.47	EDYHLVEK		cleaved L-E@N-term	-0.00480742	1031.49	516.751	1031.49	516.753	2	12	15.1.1.1828.4
fig|1428.368.peg.6270	2	99	ALELYQEAAADWNMNPNDADAKER		missed K-E@22	0.000687362	2734.23	912.417	2734.23	912.417	3	24	17.1.1.2049.3
fig|1428.368.peg.6270	2	99	CNHNEYEILDSGNVSCQPK	Carbamidomethyl(C)@1; Carbamidomethyl(C)@16	cleaved N-C@N-term	-0.000189876	2262.96	755.328	2262.96	755.328	3	23	17.1.1.1750.4
fig|1428.368.peg.6270	2	99	DMTLMVLDIVAVWPTYNPR			0.0105255	2233.14	745.387	2233.13	745.383	3	21	17.1.1.3960.2
fig|1428.368.peg.6270	2	99	EVYSTVYGR			-0.000246295	1072.52	537.267	1072.52	537.267	2	11	14.1.1.1654.16
fig|1428.368.peg.6270	2	99	FGAGWGLPSTEVEDNYTR			-0.00289199	1997.91	999.962	1997.91	999.963	2	24	16.1.1.2431.3
fig|1428.368.peg.6270	2	99	FGTDPQAQWK			-0.000785752	1176.56	589.285	1176.56	589.285	2	15	13.1.1.1483.5
fig|1428.368.peg.6270	2	99	GPGSTGGDLIQLASGYLQYSFPSTDNR			0.00363545	2800.33	934.452	2800.33	934.451	3	24	16.1.1.3920.2
fig|1428.368.peg.6270	2	99	GWTNNSSVDAIESTLVR			-0.00164654	1847.9	924.957	1847.9	924.958	2	26	17.1.1.2119.9
fig|1428.368.peg.6270	2	99	IRYASTNGSTLTLKK	Deamidated(N)@7	missed R-Y@2; missed K-K@14	-0.00308243	1652.91	414.234	1652.91	414.235	4	10	18.1.1.1619.3
fig|1428.368.peg.6270	2	99	ITNTLHYVGSSTTWEQSFSATPIGSIK			0.00058531	2924.46	975.826	2924.46	975.826	3	25	17.1.1.2114.6
fig|1428.368.peg.6270	2	99	IYNNPYGVQIQLSR			-0.00418285	1663.86	832.939	1663.87	832.941	2	24	16.1.1.2070.3
fig|1428.368.peg.6270	2	99	KITNTLHYVGSSTTWEQSFSATPIGSIK		missed K-I@1	0.0106217	3052.56	764.148	3052.55	764.145	4	25	17.1.1.2039.3
fig|1428.368.peg.6270	2	99	LEGVQR			-0.000542347	700.386	351.2	700.387	351.201	2	8	16.1.1.1391.2
fig|1428.368.peg.6270	2	99	LQARTAEYTNHCTNTYDK	Carbamidomethyl(C)@12	missed R-T@4	-0.00409296	2184.98	547.253	2184.99	547.254	4	12	18.1.1.1532.14
fig|1428.368.peg.6270	2	99	LTFDER			4.2078e-05	779.381	390.698	779.381	390.698	2	6	13.1.1.1411.4
fig|1428.368.peg.6270	2	99	MNQNCNHNEYEILDSGNVSCQPK	Carbamidomethyl(C)@5; Carbamidomethyl(C)@20		0.00472428	2750.15	917.725	2750.15	917.723	3	19	16.1.1.1725.9
fig|1428.368.peg.6270	2	99	NLYEAETVPIAFR			-0.000731038	1521.78	761.898	1521.78	761.899	2	22	16.1.1.2397.2
fig|1428.368.peg.6270	2	99	NLYEAETVPIAFRK		missed R-K@13	-0.00104735	1649.88	550.966	1649.88	550.966	3	19	16.1.1.1963.2
fig|1428.368.peg.6270	2	99	NNQHITTVGYSGGWWNGIPK			0.00411168	2228.08	743.701	2228.08	743.699	3	25	17.1.1.1987.3
fig|1428.368.peg.6270	2	99	NQNCNHNEYEILDSGNVSCQPK	Carbamidomethyl(C)@4; Carbamidomethyl(C)@19	cleaved M-N@N-term	0.0050666	2619.11	874.045	2619.11	874.043	3	22	16.1.1.1710.7
fig|1428.368.peg.6270	2	99	PYSKDPIYGK		cleaved D-P@N-term; missed K-D@4	0.000396417	1166.6	389.873	1166.6	389.873	3	12	16.1.1.1508.2
fig|1428.368.peg.6270	2	99	QAYDLAPNPTDYNK			-0.000492421	1608.74	805.378	1608.74	805.378	2	20	16.1.1.1742.8
fig|1428.368.peg.6270	2	99	QAYDLAPNPTDYNKYPYLDPYSK		missed K-Y@14	-0.00128755	2735.27	912.765	2735.28	912.766	3	18	17.1.1.2006.3
fig|1428.368.peg.6270	2	99	QAYDLAPNPTDYNKYPYLDPYSKDPIYGK		missed K-Y@14; missed K-D@23	0.0137324	3408.63	853.165	3408.62	853.162	4	20	16.1.1.2396.2
fig|1428.368.peg.6270	2	99	QFMDAVEYLVSQK	Gln->pyro-Glu@N-term		-0.000717491	1539.73	770.871	1539.73	770.871	2	21	14.1.1.3979.2
fig|1428.368.peg.6270	2	99	QFTSTNTVIEYAMPSFR	Gln->pyro-Glu@N-term		-0.00235056	1973.92	987.966	1973.92	987.967	2	24	16.1.1.3627.2
fig|1428.368.peg.6270	2	99	RFGTDPQAQWK		missed R-F@1	0.000797254	1332.66	667.336	1332.66	667.336	2	15	16.1.1.1613.3
fig|1428.368.peg.6270	2	99	RQFTSTNTVIEYAMPSFR		missed R-Q@1	0.00104938	2147.05	716.69	2147.05	716.69	3	25	17.1.1.2023.3
fig|1428.368.peg.6270	2	99	SEAVSRLEGVQR		missed R-L@6	-0.000196728	1329.7	444.241	1329.7	444.241	3	11	17.1.1.1550.10
fig|1428.368.peg.6270	2	99	SLTSTNTIATDK		cleaved N-S@N-term	-0.00205885	1250.63	626.324	1250.64	626.325	2	11	17.1.1.1565.9
fig|1428.368.peg.6270	2	99	SLTSTNTIATDKTTQIPAVK		cleaved N-S@N-term; missed K-T@12	0.00788171	2089.13	697.385	2089.13	697.383	3	17	16.1.1.1712.13
fig|1428.368.peg.6270	2	99	SPHLVTELTK			-0.00206832	1123.62	562.818	1123.62	562.819	2	14	13.1.1.1441.15
fig|1428.368.peg.6270	2	99	SSVDAIESTLVR		cleaved N-S@N-term	0.00017239	1275.67	638.841	1275.67	638.841	2	19	16.1.1.2025.2
fig|1428.368.peg.6270	2	99	TAEYTNHCTNTYDK	Carbamidomethyl(C)@8		0.00150873	1716.71	573.243	1716.7	573.242	3	14	16.1.1.1435.6
fig|1428.368.peg.6270	2	99	TIATDKTTQIPAVK		cleaved N-T@N-term; missed K-T@6	0.00162778	1485.84	496.288	1485.84	496.287	3	10	16.1.1.1600.5
fig|1428.368.peg.6270	2	99	TTQIPAVK			-0.00188639	856.5	429.257	856.502	429.258	2	12	16.1.1.1535.3
fig|1428.368.peg.6270	2	99	TVHNVSATDIGNLSLSLGAIPFGFSFYNK			0.00782101	3068.57	1023.86	3068.56	1023.86	3	27	16.1.1.3870.2
fig|1428.368.peg.6270	2	99	VGGFEVPLLTTFAQAANLHLLLLR			0.0122581	2592.49	865.171	2592.48	865.167	3	20	16.1.1.4883.2
fig|1428.368.peg.6270	2	99	YASTNGSTLTLK			0.00321898	1254.65	628.332	1254.65	628.33	2	11	13.1.1.1435.12
fig|1428.368.peg.6270	2	99	YASTNGSTLTLKK	Deamidated(N)@5	missed K-K@12	-0.00168257	1383.72	692.869	1383.72	692.87	2	20	16.1.1.1544.2
fig|1428.368.peg.6270	2	99	YPLAQAPGFELPSMNYQGVMNTSIGR			0.00774738	2840.37	947.797	2840.36	947.795	3	26	17.1.1.2472.2
fig|1428.368.peg.6270	2	99	YPYLDPYSKDPIYGK		missed K-D@9	0.00487751	1817.89	909.953	1817.89	909.951	2	16	17.1.1.1901.7
fig|1428.368.peg.6270	2	99	YQGVMNTSIGR		cleaved N-Y@N-term	-0.00182734	1224.59	613.302	1224.59	613.303	2	14	16.1.1.1661.4
fig|1428.368.peg.6270	2	99	YYTAPVDWNLFNDFR			0.00342999	1919.89	960.951	1919.88	960.949	2	20	17.1.1.2741.2
fig|1428.368.peg.6270	2	99	YYTAPVDWNLFNDFRR		missed R-R@15	-0.00242652	2075.98	693.002	2075.99	693.002	3	15	16.1.1.3073.2
fig|1428.368.peg.6270	1.82391	99	HLVTELTK		cleaved P-H@N-term	-0.00106903	939.538	470.776	939.539	470.777	2	11	16.1.1.1527.3
fig|1428.368.peg.6270	1.67778	98.32	ITDAVRSEAVSR		missed R-S@6	-0.000343894	1302.69	435.237	1302.69	435.237	3	16	18.1.1.1506.2
fig|1428.368.peg.6270	1.12494	99	ITNTLHYVGS		cleaved S-S@C-term	5.11001e-05	1103.56	552.788	1103.56	552.788	2	11	16.1.1.1646.7
fig|1428.368.peg.6270	1.09691	99	PTDYNKYPYLDPYSKDPIYGK		cleaved N-P@N-term; missed K-Y@6; missed K-D@15	0.00471729	2536.22	635.062	2536.22	635.061	4	22	17.1.1.1885.6
fig|1428.368.peg.6270	0.853872	97.02	LTPYNSNTKVIK	Deamidated(N)@5	missed K-V@9	0.00630722	1377.76	460.26	1377.75	460.257	3	10	16.1.1.1605.3
fig|1428.368.peg.6270	0.546682	98.64	GPGSTGGDLIQLASGYLQY		cleaved Y-S@C-term	0.00180305	1895.93	948.971	1895.93	948.971	2	17	17.1.1.2967.2
fig|1428.368.peg.6270	0.385103	94.86	TVIEYAMPSFR		cleaved N-T@N-term	-0.00104188	1312.65	657.331	1312.65	657.332	2	13	17.1.1.1996.2
fig|1428.368.peg.6270	0.341035	93.64	TFAIFDTGR		cleaved N-T@N-term	-0.000194704	1026.51	514.264	1026.51	514.264	2	12	17.1.1.1954.2
fig|1428.368.peg.6270	0.249492	80.39	LTPYNSNTK	Deamidated(N)@5		-0.00163696	1037.5	519.758	1037.5	519.759	2	7	16.1.1.1460.9
fig|1428.368.peg.6270	0.191789	95.54	NNQHITTVGY		cleaved Y-S@C-term	-0.00438778	1145.54	573.778	1145.55	573.781	2	10	17.1.1.1623.15
fig|1428.368.peg.6270	0.189767	85.57	AIFDTGR		cleaved F-A@N-term	-0.00013212	778.397	390.206	778.397	390.206	2	8	17.1.1.1639.4
fig|1428.368.peg.6270	0.170696	74.74	QFTSTNTVIEY		cleaved Y-A@C-term	0.0015388	1301.62	651.815	1301.61	651.814	2	10	17.1.1.1920.5
fig|1428.368.peg.6270	0.170053	37.37	TAEYTNHCTNTYDKGLK	Carbamidomethyl(C)@8	missed K-G@14	-0.00214446	2014.9	504.733	2014.91	504.734	4	6	18.1.1.1537.6
fig|1428.368.peg.6270	0.119758	95.21	NTFAIFDTGR		cleaved Y-N@N-term	0.00331653	1140.56	571.287	1140.56	571.285	2	13	17.1.1.1967.2
fig|1428.368.peg.6270	0.101275	89.57	PYGVQIQLSR		cleaved N-P@N-term	-0.00137418	1159.63	580.824	1159.64	580.825	2	9	17.1.1.1857.2
fig|1428.368.peg.6270	0.0736576	94.68	TVHNVSATDIGN		cleaved N-L@C-term	-0.0155381	1226.57	614.294	1226.59	614.302	2	10	17.1.1.1552.11
fig|1428.368.peg.6270	0.0670192	52.23	RQFTSTNTVIEY		cleaved Y-A@C-term; missed R-Q@1	0.000272655	1457.72	729.865	1457.72	729.865	2	7	17.1.1.1804.8
fig|1428.368.peg.6270	0.0472076	85.16	PHLVTELTK		cleaved S-P@N-term	-0.00278977	1036.59	519.302	1036.59	519.303	2	8	18.1.1.1657.6
fig|1428.368.peg.6270	0.00921731	95.38	ALELYQEAAADWNMNPNDADAK	Carbamidomethyl(D)@11		0.00793016	2506.12	836.379	2506.11	836.376	3	15	17.1.1.1964.4
fig|11428.3.peg.4925	2	99	ADILFR			-0.002205	733.41	367.712	733.412	367.713	2	9	4.1.1.1728.3
fig|11428.3.peg.4925	2	99	AGGPDYLALHMQAK			-0.00490746	1470.72	736.369	1470.73	736.372	2	21	1.1.1.1606.17
fig|11428.3.peg.4925	2	99	AKDFDHALAIANNTEYGLTGAVITNNRDHIEK		missed K-D@2; missed R-D@27	0.0104823	3510.76	703.159	3510.75	703.157	5	25	4.1.1.1912.5
fig|11428.3.peg.4925	2	99	AMQVADETFQTWR			-0.00359627	1581.72	791.868	1581.72	791.87	2	22	2.1.1.1874.5
fig|11428.3.peg.4925	2	99	AMQVADETFQTWRK		missed R-K@13	-0.000288645	1709.82	570.947	1709.82	570.947	3	15	2.1.1.1771.9
fig|11428.3.peg.4925	2	99	AREDFHVGNLYFNR		missed R-E@2	-0.00184639	1736.84	869.426	1736.84	869.426	2	23	2.1.1.1808.7
fig|11428.3.peg.4925	2	99	AVIHEDVYDHVLNR			-0.00178757	1678.84	560.621	1678.84	560.622	3	19	1.1.1.1568.9
fig|11428.3.peg.4925	2	99	AYKHEPFTDFSVEANK		cleaved V-A@N-term; missed K-H@3	-0.00455243	1881.89	941.95	1881.89	941.952	2	17	1.1.1.1566.26
fig|11428.3.peg.4925	2	99	DGIPVESRPIEYNR			0.00298098	1643.83	548.951	1643.83	548.95	3	15	6.1.1.1527.12
fig|11428.3.peg.4925	2	99	EADLELAAK			0.0011975	958.498	480.256	958.497	480.256	2	10	5.1.1.1663.11
fig|11428.3.peg.4925	2	99	EAGKPWNEADADTAEAIDFMEYYGR			0.0103502	2848.24	950.42	2848.23	950.417	3	24	1.1.1.2451.4
fig|11428.3.peg.4925	2	99	EDFHVGNLYFNR			0.00079559	1509.7	504.241	1509.7	504.241	3	18	4.1.1.1908.3
fig|11428.3.peg.4925	2	99	FMEVLEEAGLPAGVVNFVPGNGSEVGDYLVDHPR	Deamidated(N)@21		0.0189134	3613.76	1205.59	3613.74	1205.59	3	22	6.1.1.2396.2
fig|11428.3.peg.4925	2	99	FVSFTGSR			0.0051197	899.455	450.735	899.45	450.732	2	7	18.1.1.1701.9
fig|11428.3.peg.4925	2	99	FVSFTGSRDVGIR		missed R-D@8	0.00307524	1439.76	480.926	1439.75	480.925	3	9	2.1.1.1750.4
fig|11428.3.peg.4925	2	99	GCTGAIVGYQPFGGFNMSGTDSK	Carbamidomethyl(C)@2		0.00388345	2350.04	784.354	2350.04	784.353	3	24	4.1.1.2036.4
fig|11428.3.peg.4925	2	99	GWFIQPTIVADVAEDAR			0.00209943	1886.95	944.485	1886.95	944.484	2	22	1.1.1.2538.2
fig|11428.3.peg.4925	2	99	HEFSAILVK			-0.00187562	1042.58	522.297	1042.58	522.298	2	13	5.1.1.1737.13
fig|11428.3.peg.4925	2	99	HEPFTDFSVEANK			-0.00307461	1519.69	760.853	1519.69	760.854	2	23	1.1.1.1601.9
fig|11428.3.peg.4925	2	99	HEPFTDFSVEANKLAFEEGLK		missed K-L@13	0.00273127	2407.17	803.398	2407.17	803.397	3	27	6.1.1.2033.8
fig|11428.3.peg.4925	2	99	ILAGGEGDDSK			0.000654941	1060.5	531.26	1060.5	531.259	2	14	1.1.1.1294.11
fig|11428.3.peg.4925	2	99	ILAGGEGDDSKGWFIQPTIVADVAEDAR		missed K-G@11	0.00298194	2929.45	977.49	2929.45	977.489	3	25	1.1.1.2394.2
fig|11428.3.peg.4925	2	99	ITTEDKIVSVNPANK		missed K-I@6	-0.00263988	1627.88	814.945	1627.88	814.946	2	18	1.1.1.1487.24
fig|11428.3.peg.4925	2	99	ITTEDKIVSVNPANKEELVGR		missed K-I@6; missed K-E@15	-0.00219133	2311.24	578.816	2311.24	578.817	4	19	1.1.1.1553.8
fig|11428.3.peg.4925	2	99	IVSVNPANKEELVGR		missed K-E@9	0.00191747	1623.9	812.955	1623.89	812.954	2	19	2.1.1.1642.19
fig|11428.3.peg.4925	2	99	KHEFSAILVK		missed K-H@1	-0.000752033	1170.68	586.345	1170.68	586.345	2	15	1.1.1.1491.12
fig|11428.3.peg.4925	2	99	KVESYLGQDYPLIIGGEK		missed K-V@1	0.0047536	2008.06	670.359	2008.05	670.358	3	24	4.1.1.1933.3
fig|11428.3.peg.4925	2	99	LAFEEGLK			3.10141e-05	905.486	453.75	905.486	453.75	2	13	4.1.1.1724.3
fig|11428.3.peg.4925	2	99	LKDGIPVESR		cleaved R-P@C-term; missed K-D@2	-0.00249034	1112.62	371.879	1112.62	371.88	3	7	14.1.1.1583.3
fig|11428.3.peg.4925	2	99	LKDGIPVESRPIEYNR		missed K-D@2	0.00558505	1885.01	472.26	1885.01	472.259	4	18	4.1.1.1640.5
fig|11428.3.peg.4925	2	99	LMKEEIFGPVVAFCK	Carbamidomethyl(C)@14	missed K-E@3	0.00354149	1766.91	589.979	1766.91	589.977	3	26	1.1.1.2058.4
fig|11428.3.peg.4925	2	99	PASTTPVVAAK		cleaved K-P@N-term	-0.00267172	1040.58	521.299	1040.59	521.301	2	9	2.1.1.1449.13
fig|11428.3.peg.4925	2	99	RKHEFSAILVK		missed R-K@1; missed K-H@2	0.000554612	1326.78	443.267	1326.78	443.266	3	14	4.1.1.1552.12
fig|11428.3.peg.4925	2	99	SIVASAFGFSGQK			-0.00105415	1297.67	649.84	1297.67	649.841	2	21	1.1.1.1815.2
fig|11428.3.peg.4925	2	99	TVLLKPASTTPVVAAK		cleaved N-T@N-term	-0.0026391	1594.96	532.662	1594.97	532.663	3	18	1.1.1.1533.13
fig|11428.3.peg.4925	2	99	VANPAVLGTNMGPVNDQAAFDK			0.00545587	2228.09	743.706	2228.09	743.704	3	26	4.1.1.1887.3
fig|11428.3.peg.4925	2	99	VANPAVLGTNMGPVNDQAAFDKVMSYVAIGKEEGR		missed K-V@22; missed K-E@31	-2.63175e-05	3647.81	912.959	3647.81	912.959	4	22	6.1.1.2209.3
fig|11428.3.peg.4925	2	99	VAYKHEPFTDFSVEANK		cleaved V-V@N-term; missed K-H@4	-1.02978	1979.93	660.983	1980.96	661.327	3	20	1.1.1.1586.9
fig|11428.3.peg.4925	2	99	VESYLGQDYPLIIGGEK			-0.00375688	1879.95	940.984	1879.96	940.986	2	24	6.1.1.2035.6
fig|11428.3.peg.4925	2	99	VIAEMGGKDTIVVDKEADLELAAK		missed K-D@8; missed K-E@15	-0.000147906	2514.32	839.116	2514.33	839.116	3	27	2.1.1.1843.10
fig|11428.3.peg.4925	2	99	VMSYVAIGKEEGR		missed K-E@9	-0.00109329	1437.73	719.871	1437.73	719.872	2	17	2.1.1.1645.23
fig|11428.3.peg.4925	2	99	VNPGQIWLK			0.000218236	1053.6	527.806	1053.6	527.806	2	13	1.1.1.1683.2
fig|11428.3.peg.4925	2	99	VNPGQIWLKR		missed K-R@9	0.00171839	1209.7	605.857	1209.7	605.856	2	11	5.1.1.1779.13
fig|11428.3.peg.4925	2	99	VVAYKHEPFTDFSVEANK		cleaved M-V@N-term; missed K-H@5	0.000558718	2080.03	694.35	2080.03	694.349	3	27	1.1.1.1609.18
fig|11428.3.peg.4925	1.95861	99	AAAIVRR		missed R-R@6	-0.000442493	755.476	378.745	755.477	378.746	2	6	6.1.1.1205.2
fig|11428.3.peg.4925	1.85387	98.89	RRKHEFSAILVK		missed R-R@1; missed R-K@2; missed K-H@3	0.00320899	1482.88	371.728	1482.88	371.727	4	8	6.1.1.1406.3
fig|11428.3.peg.4925	1.3098	96.02	VIAEMGGKDTIVVDK		missed K-D@8	0.00333545	1573.84	525.621	1573.84	525.62	3	8	4.1.1.1676.13
fig|11428.3.peg.4925	1.30103	95.96	VMSYVAIGK			-0.00574688	966.515	484.265	966.521	484.268	2	9	2.1.1.1688.10
fig|11428.3.peg.4925	1.02687	92.31	VIAEMGGK			-0.00156669	803.419	402.717	803.421	402.718	2	5	5.1.1.1531.5
fig|11428.3.peg.4925	0.863279	99	VNPANKEELVGR		cleaved S-V@N-term; missed K-E@6	-0.00177335	1324.71	663.361	1324.71	663.362	2	11	5.1.1.1554.21
fig|11428.3.peg.4925	0.567031	98.69	LKPASTTPVVAAK		cleaved L-L@N-term	-0.000912482	1281.76	428.262	1281.77	428.262	3	9	4.1.1.1474.11
fig|11428.3.peg.4925	0.0329203	72.25	PGQIWLKR		cleaved N-P@N-term; missed K-R@7	-0.00157464	996.585	499.3	996.587	499.301	2	7	1.1.1.1591.7
fig|11428.3.peg.1959	2	99	DRYGSTFQAAMGAEAIKK	Oxidation(M)@11	missed R-Y@2; missed K-K@17	0.00155932	1958.95	653.992	1958.95	653.991	3	12	6.1.1.1487.22
fig|11428.3.peg.1959	2	99	EGLTVLEYFISTHGAR			0.0103455	1791.93	598.316	1791.92	598.312	3	19	1.1.1.2409.2
fig|11428.3.peg.1959	2	99	EGNEVIESLYDR			-0.0054365	1422.66	712.336	1422.66	712.339	2	17	8.1.1.1811.7
fig|11428.3.peg.1959	2	99	EIIASREEVAPFSK		missed R-E@6	-0.00470842	1574.83	788.42	1574.83	788.422	2	14	1.1.1.1570.24
fig|11428.3.peg.1959	2	99	ELTEGSIDPK			-0.00161674	1087.54	544.776	1087.54	544.777	2	12	9.1.1.1426.17
fig|11428.3.peg.1959	2	99	EMALELFKPFVMK			-0.00160432	1581.83	528.283	1581.83	528.284	3	16	6.1.1.2177.2
fig|11428.3.peg.1959	2	99	FATSDLNDLYR			-0.00112571	1313.62	657.819	1313.63	657.82	2	16	2.1.1.1853.5
fig|11428.3.peg.1959	2	99	GLITEEERYDR		missed R-Y@8	-0.00134828	1379.67	690.841	1379.67	690.841	2	18	8.1.1.1513.21
fig|11428.3.peg.1959	2	99	GLLIGAIK			-0.000744477	783.521	392.768	783.522	392.768	2	10	4.1.1.1816.2
fig|11428.3.peg.1959	2	99	GLMANPSGR			0.00224421	901.446	451.73	901.444	451.729	2	10	8.1.1.1403.2
fig|11428.3.peg.1959	2	99	GNASNFTQLAGMR			-0.00421426	1365.64	683.828	1365.65	683.83	2	19	9.1.1.1645.9
fig|11428.3.peg.1959	2	99	GRPVTGPGNRPLK			-0.00120632	1347.77	450.265	1347.77	450.265	3	15	2.1.1.1381.4
fig|11428.3.peg.1959	2	99	IGLASPDK			0.000452141	799.444	400.729	799.444	400.729	2	8	4.1.1.1514.4
fig|11428.3.peg.1959	2	99	IGLASPDKIR		missed K-I@8	0.0007577	1068.63	357.217	1068.63	357.217	3	12	7.1.1.1476.2
fig|11428.3.peg.1959	2	99	IIELPIK			-0.00070733	824.536	413.276	824.537	413.276	2	9	2.1.1.1832.2
fig|11428.3.peg.1959	2	99	IQEIFEAR			-0.00102735	1004.53	503.271	1004.53	503.272	2	12	9.1.1.1550.5
fig|11428.3.peg.1959	2	99	LGIQAFEPTLVEGR			0.000105146	1528.83	765.42	1528.82	765.42	2	24	1.1.1.2118.2
fig|11428.3.peg.1959	2	99	LKVTPGQPISHGK		missed K-V@2	-0.00135898	1360.78	454.601	1360.78	454.602	3	11	2.1.1.1451.10
fig|11428.3.peg.1959	2	99	LLDLGAPSIIVQNEKR		missed K-R@15	0.00193997	1765.01	589.345	1765.01	589.344	3	17	4.1.1.1919.3
fig|11428.3.peg.1959	2	99	LLMLAAQNILNPK			0.00207619	1437.84	719.927	1437.84	719.926	2	17	1.1.1.2198.3
fig|11428.3.peg.1959	2	99	LLQDIDLDKEVDFLKEELK		missed K-E@9; missed K-E@15	-0.00123778	2302.23	576.565	2302.23	576.565	4	19	6.1.1.2230.2
fig|11428.3.peg.1959	2	99	MGLVLDMSPR			-0.00154001	1117.56	559.788	1117.56	559.788	2	14	4.1.1.1910.3
fig|11428.3.peg.1959	2	99	MQGVEIGDKHVEVMVR		missed K-H@9	-0.00742976	1825.91	913.962	1825.92	913.966	2	24	7.1.1.1609.26
fig|11428.3.peg.1959	2	99	NPIFMMSDSGAR			0.00124227	1324.59	663.303	1324.59	663.302	2	15	2.1.1.1828.10
fig|11428.3.peg.1959	2	99	PVLLGITK		cleaved R-P@N-term	0.00130993	839.549	420.782	839.548	420.781	2	12	9.1.1.1605.3
fig|11428.3.peg.1959	2	99	QLLSEKEYR		missed K-E@6	-8.13714e-05	1164.61	389.212	1164.61	389.212	3	8	4.1.1.1534.7
fig|11428.3.peg.1959	2	99	QPATARPVLLGITK			0.000359027	1463.88	488.968	1463.88	488.968	3	14	7.1.1.1602.4
fig|11428.3.peg.1959	2	99	RGLITEEERYDR		missed R-G@1; missed R-Y@9	0.00826535	1535.78	384.952	1535.77	384.95	4	9	9.1.1.1397.4
fig|11428.3.peg.1959	2	99	RLEVLEAFR		missed R-L@1	-0.00154997	1131.64	566.827	1131.64	566.827	2	15	6.1.1.1703.2
fig|11428.3.peg.1959	2	99	SMLLLTTVGK			-0.00158846	1061.61	531.814	1061.62	531.815	2	17	5.1.1.1961.2
fig|11428.3.peg.1959	2	99	SVIVVGPNLK			-0.00149976	1024.63	513.321	1024.63	513.321	2	13	6.1.1.1584.3
fig|11428.3.peg.1959	2	99	TFHTGGVAGDDITQGLPR			-0.00730344	1840.9	921.457	1840.91	921.461	2	25	7.1.1.1634.11
fig|11428.3.peg.1959	2	99	TYAIPYGAR			-0.000753558	1010.52	506.266	1010.52	506.267	2	9	18.1.1.1735.6
fig|11428.3.peg.1959	2	99	VAVAASAVNNATFTEEQK			-0.00708393	1848.91	925.465	1848.92	925.468	2	20	7.1.1.1589.24
fig|11428.3.peg.1959	2	99	VISIWSNAK			0.000343085	1016.57	509.29	1016.57	509.29	2	13	8.1.1.1672.5
fig|11428.3.peg.1959	2	99	VQPEVWDVLESVIK			-0.00347414	1639.88	820.947	1639.88	820.948	2	18	1.1.1.2975.2
fig|11428.3.peg.1959	2	99	VSDAGETDVLPGTLLDIHQFTDANAK			-2.66836e-05	2726.34	909.787	2726.34	909.787	3	18	7.1.1.2551.15
fig|11428.3.peg.1959	2	99	VTDITAVQEYLLR			-0.000914056	1519.82	760.919	1519.82	760.92	2	23	1.1.1.2257.4
fig|11428.3.peg.1959	2	99	YGSTFQAAMGAEAIKK		missed K-K@15	-0.000692229	1671.83	558.283	1671.83	558.284	3	22	1.1.1.1589.11
fig|11428.3.peg.1959	1.95861	99	VLTDAAIK			-0.00220665	829.489	415.752	829.491	415.753	2	9	9.1.1.1402.6
fig|11428.3.peg.1959	1.88606	98.94	FQITETSR			-0.00188862	980.491	491.253	980.493	491.254	2	9	9.1.1.1445.8
fig|11428.3.peg.1959	1.88606	98.93	TADSGYLTR			0.000847723	982.473	492.244	982.472	492.243	2	7	9.1.1.1380.9
fig|11428.3.peg.1959	1.76955	98.61	FRQNLLGK		missed R-Q@2	-0.00259316	974.564	488.289	974.566	488.29	2	8	9.1.1.1406.12
fig|11428.3.peg.1959	1.69897	98.4	FATSDLNDLYRR		missed R-R@11	0.0047363	1469.73	735.873	1469.73	735.87	2	12	6.1.1.1632.19
fig|11428.3.peg.1959	1.284	95.85	LVPAGTGMNR			0.00361337	1014.53	508.273	1014.53	508.271	2	7	8.1.1.1415.12
fig|11428.3.peg.1959	1.19382	94.81	SWSYGEVK			0.00223647	954.447	478.231	954.445	478.23	2	7	5.1.1.1705.9
fig|11428.3.peg.1959	1.11919	93.87	GLAHNIK			-0.00298644	751.431	376.723	751.434	376.724	2	7	7.1.1.1253.2
fig|11428.3.peg.1959	0.779892	86.36	SWSYGEVKKPETINYR		missed K-K@8	0.00403411	1955.98	490.002	1955.97	490.001	4	10	6.1.1.1540.7
fig|11428.3.peg.1959	0.709965	83.87	DGLFCER	Carbamidomethyl(C)@5		0.00575624	895.392	448.703	895.386	448.7	2	8	9.1.1.1519.2
fig|11428.3.peg.1959	0.628932	80.39	GLADTALK			-0.00176504	787.442	394.728	787.444	394.729	2	5	9.1.1.1420.7
fig|11428.3.peg.1959	0.559091	80.37	SLSHMLK			0.0282556	814.465	408.24	814.437	408.226	2	7	6.1.1.1376.3
fig|11428.3.peg.1959	0.413413	66.61	RNPIFMMSDSGAR		missed R-N@1	-0.000175515	1480.69	741.353	1480.69	741.353	2	9	9.1.1.1592.13
fig|11428.3.peg.1959	0.203426	72.84	LMKSLNK		missed K-S@3	-0.0167131	832.467	417.241	832.484	417.249	2	6	2.1.1.1695.6
fig|11428.3.peg.1959	0.0700704	17.97	EHPVLLNR			-0.00185931	976.544	489.279	976.545	489.28	2	5	4.1.1.1502.6
fig|11428.3.peg.1959	0.0136762	16.14	ALELFK		cleaved M-A@N-term; cleaved K-P@C-term	0.00157885	719.423	360.719	719.422	360.718	2	6	15.1.1.1746.2
fig|11428.3.peg.1959	0.00568285	24.48	IAEVFK		cleaved I-I@N-term	-0.000152063	705.406	353.71	705.406	353.71	2	6	4.1.1.1567.2
fig|11428.3.peg.1938	2	99	AFRPEFLNR			-0.00248767	1148.61	383.876	1148.61	383.877	3	12	2.1.1.1726.3
fig|11428.3.peg.1938	2	99	AIDLIDEAASK			-0.00134425	1144.6	573.305	1144.6	573.306	2	15	5.1.1.1843.6
fig|11428.3.peg.1938	2	99	ALAESMFGDEDAMIR			-0.00392464	1654.73	828.372	1654.73	828.374	2	26	7.1.1.2182.2
fig|11428.3.peg.1938	2	99	ALIALGLSPEK			-5.13636e-05	1110.66	556.34	1110.66	556.34	2	17	4.1.1.1894.5
fig|11428.3.peg.1938	2	99	DAAVQSQEFEK			-0.00297515	1250.57	626.295	1250.58	626.296	2	14	7.1.1.1431.21
fig|11428.3.peg.1938	2	99	DLTVVAR			0.000710901	772.445	387.23	772.444	387.229	2	7	7.1.1.1463.2
fig|11428.3.peg.1938	2	99	EGEGIAAK			0.00107386	773.393	387.704	773.392	387.703	2	8	7.1.1.1240.2
fig|11428.3.peg.1938	2	99	EGEGVAAR			0.00110206	787.383	394.699	787.382	394.698	2	8	7.1.1.1200.3
fig|11428.3.peg.1938	2	99	EKDAAVQSQEFEK		missed K-D@2	-0.00435029	1507.71	754.863	1507.72	754.865	2	11	8.1.1.1379.25
fig|11428.3.peg.1938	2	99	ENRLDPVIGR		missed R-L@3	-0.00478286	1167.63	584.823	1167.64	584.825	2	10	7.1.1.1477.18
fig|11428.3.peg.1938	2	99	EVEALIGR			-0.00112125	885.491	443.753	885.492	443.753	2	12	4.1.1.1650.3
fig|11428.3.peg.1938	2	99	FQPIHVDEPSLEESTQILK			0.00155914	2209.13	737.383	2209.13	737.383	3	25	8.1.1.2158.2
fig|11428.3.peg.1938	2	99	GELQCIGATTLDEYRK	Carbamidomethyl(C)@5	missed R-K@15	-0.00158645	1852.9	927.456	1852.9	927.457	2	18	2.1.1.1812.18
fig|11428.3.peg.1938	2	99	GLRDRYEAHHR		missed R-D@3; missed R-Y@5	0.00662336	1408.71	353.186	1408.71	353.184	4	9	7.1.1.1246.2
fig|11428.3.peg.1938	2	99	GTEASQTVHYTPR			-0.000454948	1445.69	723.852	1445.69	723.852	2	12	1.1.1.1356.15
fig|11428.3.peg.1938	2	99	HLGFNVQDESR			-0.00187803	1300.61	434.545	1300.62	434.546	3	12	7.1.1.1493.6
fig|11428.3.peg.1938	2	99	HLGFNVQDESRDYSDMK		missed R-D@11	0.00387606	2039.9	680.976	2039.9	680.974	3	21	7.1.1.1593.7
fig|11428.3.peg.1938	2	99	HSTSRLVGSPPGYVGYEEGGQLTEK		missed R-L@5	-0.00751772	2647.28	662.827	2647.29	662.829	4	18	8.1.1.1588.22
fig|11428.3.peg.1938	2	99	HVEDRLSEELLK		missed R-L@5	-0.00581811	1466.77	734.391	1466.77	734.394	2	17	7.1.1.1568.25
fig|11428.3.peg.1938	2	99	IDMSEYMEK			-0.00213316	1144.48	573.245	1144.48	573.246	2	14	9.1.1.1619.6
fig|11428.3.peg.1938	2	99	IGHNNIGTEHILLGLVR			0.00553433	1855.05	619.357	1855.04	619.355	3	27	5.1.1.1941.8
fig|11428.3.peg.1938	2	99	KVIELSMDEAR		missed K-V@1	0.0117055	1289.68	430.899	1289.66	430.896	3	11	4.1.1.1659.4
fig|11428.3.peg.1938	2	99	KVIELSMDEARK		missed K-V@1; missed R-K@11	0.00517527	1417.76	355.449	1417.76	355.447	4	7	7.1.1.1471.2
fig|11428.3.peg.1938	2	99	LDPVIGR			-0.00119631	768.448	385.231	768.449	385.232	2	8	9.1.1.1442.3
fig|11428.3.peg.1938	2	99	LSDRYITDR		missed R-Y@4	0.000989318	1137.58	380.2	1137.58	380.2	3	10	7.1.1.1432.2
fig|11428.3.peg.1938	2	99	LSEELLK			-0.0013639	830.473	416.244	830.475	416.245	2	9	5.1.1.1705.3
fig|11428.3.peg.1938	2	99	LVGSPPGYVGYEEGGQLTEK			0.00840911	2079.03	1040.52	2079.02	1040.52	2	21	5.1.1.1860.20
fig|11428.3.peg.1938	2	99	NKHLGFNVQDESR		missed K-H@2	-0.0107128	1542.74	772.379	1542.75	772.384	2	17	9.1.1.1388.7
fig|11428.3.peg.1938	2	99	NNPVLIGEPGVGK			-0.000778526	1292.71	647.361	1292.71	647.362	2	17	1.1.1.1578.11
fig|11428.3.peg.1938	2	99	RPIGSFIFLGPTGVGK			-0.000950089	1644.93	549.319	1644.94	549.319	3	19	17.1.1.2054.2
fig|11428.3.peg.1938	2	99	TAIAEGLAQQIVNNEVPETLR			0.00181912	2265.2	756.073	2265.2	756.073	3	24	6.1.1.2166.4
fig|11428.3.peg.1938	2	99	TKNNPVLIGEPGVGK		missed K-N@2	-0.000939624	1521.85	761.933	1521.85	761.933	2	15	1.1.1.1503.23
fig|11428.3.peg.1938	2	99	VIELSMDEAR			-0.00133151	1161.57	581.792	1161.57	581.792	2	15	1.1.1.1614.6
fig|11428.3.peg.1938	2	99	VIELSMDEARK		missed R-K@10	0.000992839	1289.67	645.84	1289.66	645.84	2	13	6.1.1.1510.6
fig|11428.3.peg.1938	2	99	VIEVLSR			-0.0236365	814.468	408.241	814.491	408.253	2	10	3.1.1.1682.2
fig|11428.3.peg.1938	2	99	VIGQDEAVVAVAK			-0.00355609	1297.72	649.868	1297.72	649.869	2	22	7.1.1.1567.19
fig|11428.3.peg.1938	2	99	VLALSQEEAIR			-0.0014028	1227.68	614.848	1227.68	614.848	2	19	1.1.1.1602.8
fig|11428.3.peg.1938	2	99	VLNNLGVSLNK			-0.00294627	1169.67	585.844	1169.68	585.846	2	17	1.1.1.1614.7
fig|11428.3.peg.1938	2	99	VMDELKK		missed K-K@6	-0.00149226	861.461	431.738	861.463	431.739	2	6	7.1.1.1322.2
fig|11428.3.peg.1938	2	99	VMTLDMGTVVAGTK			0.00176256	1421.73	711.871	1421.73	711.87	2	21	5.1.1.1952.5
fig|11428.3.peg.1938	2	99	VQKEVEALIGR		missed K-E@3	-0.004418	1240.71	621.362	1240.71	621.364	2	12	9.1.1.1529.17
fig|11428.3.peg.1938	2	99	VSITDDAIDAAVK			-0.014816	1316.67	659.341	1316.68	659.348	2	17	4.1.1.1809.5
fig|11428.3.peg.1938	2	99	YIEKDAALER		missed K-D@4	0.00475361	1206.63	403.217	1206.62	403.215	3	13	4.1.1.1498.2
fig|11428.3.peg.1938	1.88606	98.96	SYTTPPNLK			-0.0024569	1019.53	510.77	1019.53	510.772	2	7	17.1.1.1621.11
fig|11428.3.peg.1938	1.79588	98.76	GFDREYGARPLRR		missed R-E@4; missed R-R@12	-0.00317028	1591.83	398.965	1591.83	398.966	4	7	16.1.1.1514.3
fig|11428.3.peg.1938	1.38722	96.73	VMDEIR			0.00106318	761.375	381.695	761.374	381.694	2	6	1.1.1.1393.3
fig|11428.3.peg.1938	0.90309	89.83	YRGEFEDR		missed R-G@2	0.0086694	1070.49	357.836	1070.48	357.833	3	6	8.1.1.1349.2
fig|11428.3.peg.1938	0.821023	87.6	LRSYTTPPNLK		missed R-S@2	0.00539895	1288.72	430.58	1288.71	430.579	3	8	8.1.1.1488.3
fig|11428.3.peg.1938	0.325139	58.38	GFDREYGARPLR		missed R-E@4	0.00666989	1435.74	479.587	1435.73	479.585	3	8	9.1.1.1398.13
fig|11428.3.peg.1938	0.00305075	23.41	EGGQLTEK		cleaved E-E@N-term	0.0146715	860.439	431.227	860.424	431.219	2	7	9.1.1.1449.4
fig|11428.3.peg.5200	2	99	ADKSEFDVIVPAEPK		missed K-S@3	0.00487293	1643.85	548.956	1643.84	548.954	3	18	9.1.1.1636.3
fig|11428.3.peg.5200	2	99	ALSEVFNSNEK	Deamidated(N)@7		0.0110155	1237.59	619.804	1237.58	619.799	2	13	9.1.1.1517.20
fig|11428.3.peg.5200	2	99	ALVCSSTQEGIEQLNQPEGR	Carbamidomethyl(C)@4		0.00374238	2215.06	739.36	2215.05	739.359	3	16	2.1.1.1769.14
fig|11428.3.peg.5200	2	99	ANVGHLNAASGVAGLIK			0.00303265	1590.89	531.303	1590.88	531.302	3	30	9.1.1.1642.2
fig|11428.3.peg.5200	2	99	DIDSAIDNLK			0.000717368	1102.55	552.283	1102.55	552.283	2	15	9.1.1.1692.3
fig|11428.3.peg.5200	2	99	EPLFLQVFER			-0.00158229	1276.68	639.347	1276.68	639.348	2	15	6.1.1.2231.2
fig|11428.3.peg.5200	2	99	EQVLQAFEHQK			0.00057627	1355.68	678.849	1355.68	678.849	2	12	5.1.1.1751.20
fig|11428.3.peg.5200	2	99	EVLYPTTFSIDEATGK			-0.00188161	1769.87	885.942	1769.87	885.943	2	16	4.1.1.1974.11
fig|11428.3.peg.5200	2	99	FIINPEER			-0.0015993	1016.53	509.271	1016.53	509.272	2	11	9.1.1.1582.3
fig|11428.3.peg.5200	2	99	IALPTYPFEK			-0.00249542	1177.64	589.825	1177.64	589.826	2	15	9.1.1.2039.3
fig|11428.3.peg.5200	2	99	IECEEQFLPK	Carbamidomethyl(C)@3		-0.00390179	1291.61	646.811	1291.61	646.813	2	13	4.1.1.1750.7
fig|11428.3.peg.5200	2	99	IGYTAPSVEGQVEVIK			0.000269042	1688.9	845.457	1688.9	845.457	2	16	2.1.1.1831.17
fig|11428.3.peg.5200	2	99	IIHMWGITNEER			0.0035899	1497.74	500.255	1497.74	500.254	3	13	5.1.1.1856.5
fig|11428.3.peg.5200	2	99	IMDPQIR			-0.00129121	871.457	436.736	871.459	436.737	2	9	9.1.1.1439.6
fig|11428.3.peg.5200	2	99	INGVIHGAGILGGK	Deamidated(N)@2		0.00356902	1305.74	436.255	1305.74	436.254	3	19	9.1.1.1601.3
fig|11428.3.peg.5200	2	99	INHIQKLESLGAK		missed K-L@6	-0.00456684	1449.83	484.283	1449.83	484.284	3	15	9.1.1.1445.7
fig|11428.3.peg.5200	2	99	IPYLSNLTGTWIRPEEATNPVYWVK			0.00859753	2946.54	983.186	2946.53	983.183	3	20	6.1.1.2273.4
fig|11428.3.peg.5200	2	99	KVLEIEETGSK		missed K-V@1	0.000703527	1231.67	411.563	1231.67	411.563	3	11	9.1.1.1384.7
fig|11428.3.peg.5200	2	99	LANYISR			-0.00144546	835.454	418.734	835.455	418.735	2	10	9.1.1.1405.4
fig|11428.3.peg.5200	2	99	LEATSNSRPYQMLMISAK			-0.00056538	2039.02	680.68	2039.02	680.68	3	14	4.1.1.1856.12
fig|11428.3.peg.5200	2	99	LGDTIEIK			-0.00330151	887.493	444.754	887.496	444.755	2	11	9.1.1.1494.6
fig|11428.3.peg.5200	2	99	LLDEVQEIYGLPTR			0.00360765	1644.88	823.445	1644.87	823.443	2	21	9.1.1.2244.3
fig|11428.3.peg.5200	2	99	LLDYENGNER	Deamidated(N)@6		0.00221509	1222.55	612.282	1222.55	612.281	2	14	9.1.1.1456.18
fig|11428.3.peg.5200	2	99	LPWISVNWSDWK			0.00476322	1529.77	765.893	1529.77	765.891	2	20	9.1.1.3053.3
fig|11428.3.peg.5200	2	99	MAQHEANVEPESISYIETHGTATK			-0.98844	2641.24	661.317	2642.23	661.564	4	15	2.1.1.1718.19
fig|11428.3.peg.5200	2	99	NMTDAQMYTGK			-0.00268227	1258.53	630.272	1258.53	630.273	2	13	9.1.1.1439.17
fig|11428.3.peg.5200	2	99	QGEVLIHSPGELQAR			-0.000463037	1632.86	817.436	1632.86	817.436	2	16	9.1.1.1523.26
fig|11428.3.peg.5200	2	99	RVQYANVKEEHPK		missed R-V@1; missed K-E@8	0.00212269	1596.84	533.287	1596.84	533.286	3	14	6.1.1.1274.4
fig|11428.3.peg.5200	2	99	SHYQLSSAQK			0.000703042	1147.56	383.528	1147.56	383.528	3	8	4.1.1.1398.3
fig|11428.3.peg.5200	2	99	SVQQDVSDMYFLFSHITR			0.00433451	2172.04	725.019	2172.03	725.018	3	21	6.1.1.2479.2
fig|11428.3.peg.5200	2	99	TGLPNRDEWDMHLK		missed R-D@6	0.00482953	1710.82	428.712	1710.81	428.711	4	13	9.1.1.1587.3
fig|11428.3.peg.5200	2	99	TYDHDFKR		missed K-R@7	0.00179255	1080.5	361.174	1080.5	361.174	3	8	6.1.1.1287.2
fig|11428.3.peg.5200	2	99	VFPQEYPNIR			-0.00172757	1261.64	631.829	1261.65	631.83	2	15	9.1.1.1613.8
fig|11428.3.peg.5200	2	99	VITVGVGPSYK			0.00154555	1118.64	560.325	1118.63	560.324	2	13	5.1.1.1744.15
fig|11428.3.peg.5200	2	99	VITVGVGPSYKK		missed K-K@11	0.000180391	1246.73	624.372	1246.73	624.372	2	11	9.1.1.1445.18
fig|11428.3.peg.5200	2	99	VQYANVKEEHPK		missed K-E@7	-0.00100045	1440.74	721.375	1440.74	721.375	2	16	9.1.1.1284.7
fig|11428.3.peg.5200	2	99	VVGDESIIAEK			-0.00507319	1158.61	580.311	1158.61	580.314	2	13	2.1.1.1641.13
fig|11428.3.peg.5200	2	99	VVTVEPGFAFNKENNDR		missed K-E@12	0.00517565	1934.95	645.992	1934.95	645.99	3	16	9.1.1.1605.15
fig|11428.3.peg.5200	2	99	YHEGMTSSPDGK			-0.000748332	1307.54	654.779	1307.55	654.78	2	7	9.1.1.1269.16
fig|11428.3.peg.5200	1.79588	99	NISDSISIR			-0.0044343	1003.53	502.77	1003.53	502.772	2	8	5.1.1.1747.5
fig|11428.3.peg.5200	1.69897	99	ISELETQTK			-0.000973494	1047.54	524.779	1047.54	524.78	2	8	9.1.1.1341.14
fig|11428.3.peg.5200	1.4437	98.69	SFCAIGSVK	Carbamidomethyl(C)@3		-0.00271607	967.477	484.746	967.48	484.747	2	10	9.1.1.1490.5
fig|11428.3.peg.5200	1.39794	98.55	LILVSR			-0.00330776	699.461	350.738	699.464	350.739	2	8	9.1.1.1491.2
fig|11428.3.peg.5200	0.829738	96.52	QSVPIGSVK	Gln->pyro-Glu@N-term		-7.46238e-06	896.497	449.256	896.497	449.256	2	7	9.1.1.1537.6
fig|11428.3.peg.5200	0.826814	94.18	AFTQLIK			-0.000540799	819.485	410.75	819.485	410.75	2	8	9.1.1.1565.3
fig|11428.3.peg.5200	0.774691	93.31	ISFTIDSNVTKK		missed K-K@11	0.0001785	1351.74	676.875	1351.73	676.875	2	10	6.1.1.1564.13
fig|11428.3.peg.5200	0.716699	92.23	QEIQELQPVK			-0.000170663	1210.66	606.335	1210.66	606.335	2	7	9.1.1.1480.17
fig|11428.3.peg.5200	0.69897	91.89	LMVLSAR			-0.00924135	788.449	395.232	788.458	395.236	2	6	4.1.1.1664.5
fig|11428.3.peg.5200	0.665546	91.09	IQYKDYSEWQQSEKEK		missed K-D@4; missed K-E@14	-0.00149089	2087.98	523.002	2087.98	523.002	4	9	9.1.1.1482.14
fig|11428.3.peg.5200	0.575118	88.63	LQGNPYDLGQK			-0.00164525	1231.62	616.816	1231.62	616.817	2	9	9.1.1.1477.15
fig|11428.3.peg.5200	0.378824	85.69	YTGQEDVVIGSPITGR		cleaved R-P@C-term	0.0058135	1690.86	846.437	1690.85	846.434	2	8	4.1.1.1795.22
fig|11428.3.peg.5200	0.295849	73.38	YHEGMTSSPDGKVR		missed K-V@12	0.00838824	1562.72	521.915	1562.71	521.912	3	6	9.1.1.1288.16
fig|11428.3.peg.5200	0.264401	70.34	IFNTVR			-0.00717911	748.416	375.215	748.423	375.219	2	4	2.1.1.1534.4
fig|11428.3.peg.5200	0.131356	49.9	VLEIEETGSK			-0.0131723	1103.56	552.786	1103.57	552.793	2	7	5.1.1.1656.12
fig|11428.3.peg.5200	0.0710923	33.42	QASIEYVNCK	Carbamidomethyl(C)@9		0.00342717	1210.57	606.292	1210.57	606.29	2	5	4.1.1.1571.19
fig|11428.3.peg.5200	0.0675262	66.83	KNGYKYHEGMTSSPDGK	Deamidated(N)@2	missed K-N@1; missed K-Y@5	0.0015272	1898.85	633.957	1898.85	633.956	3	6	9.1.1.1303.21
fig|11428.3.peg.5200	0.0315171	96.77	HIVLEEAPK		cleaved V-H@N-term	-0.00413578	1034.57	518.293	1034.58	518.295	2	10	5.1.1.1590.6
fig|11428.3.peg.5200	0.0305841	17.15	LAEYLAR			0.0207621	834.481	418.248	834.46	418.237	2	6	1.1.1.1555.5
fig|11428.3.peg.5200	0.0101054	25.63	SEAGTLSYK		cleaved F-S@N-term	0.0162977	954.482	478.248	954.466	478.24	2	6	17.1.1.1793.5
fig|11428.3.peg.5200	0.00217692	25.76	LIQELEK		cleaved N-L@N-term	-0.000836024	871.501	436.758	871.501	436.758	2	8	4.1.1.1605.8
fig|11428.3.peg.1964	2	99	AEVFVLSK			-0.000196758	891.506	446.76	891.507	446.761	2	12	7.1.1.1614.2
fig|11428.3.peg.1964	2	99	AEVFVLSKEEGGR		missed K-E@8	-0.00100304	1419.73	474.252	1419.74	474.253	3	15	1.1.1.1544.4
fig|11428.3.peg.1964	2	99	AGGAEARGYDQIDAAPEERER	Oxidation(P)@16	missed R-G@7; missed R-E@19	0.00962912	2276.05	570.02	2276.04	570.018	4	18	9.1.1.1386.12
fig|11428.3.peg.1964	2	99	AKFERSKPHVNIGTIGHVDHGK		missed K-F@2; missed R-S@5	0.00317809	2426.3	607.581	2426.29	607.581	4	18	9.1.1.1376.17
fig|11428.3.peg.1964	2	99	ALQGEADWEAK			-0.00041719	1216.57	609.293	1216.57	609.293	2	16	1.1.1.1510.16
fig|11428.3.peg.1964	2	99	ASTTVTGVEMFR		cleaved N-A@N-term	0.000561071	1297.63	649.824	1297.63	649.824	2	18	8.1.1.1680.3
fig|11428.3.peg.1964	2	99	CDMVDDEELLELVEMEVR	Carbamidomethyl(C)@1		0.00556345	2222.98	1112.5	2222.97	1112.49	2	23	6.1.1.2694.5
fig|11428.3.peg.1964	2	99	DLLSEYGFPGDDIPVIK			0.0020676	1876.95	939.481	1876.95	939.48	2	20	1.1.1.2620.2
fig|11428.3.peg.1964	2	99	EDIQRGQVLAK		missed R-G@5	0.00348423	1255.69	419.571	1255.69	419.57	3	9	9.1.1.1346.9
fig|11428.3.peg.1964	2	99	EHILLSR			0.000688999	866.498	434.256	866.497	434.256	2	8	7.1.1.1419.8
fig|11428.3.peg.1964	2	99	ERGITISTAHVEYETETR		missed R-G@2	0.00141042	2091.02	698.015	2091.02	698.015	3	16	6.1.1.1520.20
fig|11428.3.peg.1964	2	99	ETDKPFLMPVEDVFSITGR			0.00267628	2180.08	727.702	2180.08	727.701	3	25	1.1.1.2478.2
fig|11428.3.peg.1964	2	99	FANYRPQFYFR		cleaved F-F@N-term	-0.00179259	1507.73	503.585	1507.74	503.586	3	16	5.1.1.1913.2
fig|11428.3.peg.1964	2	99	FERSKPHVNIGTIGHVDHGK		missed R-S@3	0.00982731	2227.17	557.8	2227.16	557.798	4	19	9.1.1.1385.16
fig|11428.3.peg.1964	2	99	FKAEVFVLSK		missed K-A@2	-0.001105	1166.67	584.342	1166.67	584.342	2	14	7.1.1.1668.3
fig|11428.3.peg.1964	2	99	FKAEVFVLSKEEGGR		missed K-A@2; missed K-E@10	-0.00115438	1694.9	565.973	1694.9	565.974	3	19	1.1.1.1604.12
fig|11428.3.peg.1964	2	99	GITISTAHVEYETETR			0.000273807	1805.88	903.947	1805.88	903.947	2	23	1.1.1.1577.22
fig|11428.3.peg.1964	2	99	GITISTAHVEYETETRHYAHVDCPGHADYVK	Carbamidomethyl(C)@23	missed R-H@16	0.00823321	3555.66	712.139	3555.65	712.137	5	15	7.1.1.1585.11
fig|11428.3.peg.1964	2	99	GQVLAKSGSVK		missed K-S@6	-0.00358267	1072.62	537.317	1072.62	537.319	2	12	7.1.1.1265.4
fig|11428.3.peg.1964	2	99	GVAREDIQR		missed R-E@4	-0.00173184	1042.55	522.282	1042.55	522.283	2	10	7.1.1.1283.7
fig|11428.3.peg.1964	2	99	GYDQIDAAPEER	Oxidation(P)@9		0.000295153	1378.6	690.308	1378.6	690.307	2	15	1.1.1.1436.19
[truncated: 15,300 more rows]

## Sheet: Areas without norm
Table S4.3 Peak areas values of the of the global search with the supernatants and solubilized proteins from spore/crystal mixtures with MarkerView
		O-V84.2
		Supernatant						Crystal				Supernatant						Crystal
		24 h			48 h			72 h				24 h			48 h			72 h
Row	Peak Name	R1	R2	R3	R1	R2	R3	R1	R2	R3		R1	R2	R3	R1	R2	R3	R1	R2	R3
1	fig|1428.368.peg.2788	5237.85	7806.95	4173.26	2679.4	8173.93	4134.63	17196.9	17880.6	7047.69		3272.02	20928	9860.05	216675	141075	3396.58	47662.2	3632.98	324076
[truncated: 1,815 more rows]

## Sheet: Areas norm totalareasum
Table S5.4 Peak areas values of the of the global search with the supernatants and solubilized proteins from spore/crystal mixtures corrected by totalareasum.
[truncated: 1,820 more rows]

[truncated: 2 more sheets: PCA norm, DistAreas norm]
